# Supplementary material for: Virtual Screening for FDA-Approved Drugs That Selectively Inhibit Arginase Type 1 and 2
Source: MDPI journal article supplement (doi:10.3390/molecules27165134), 2022-08-12
Supplement: s1 [file s1]

Supplementary Table S1. Human arginase structures found in the PDB.

| PDB ID    |                                                                                                                                                                                                                                                                  |
|-----------|------------------------------------------------------------------------------------------------------------------------------------------------------------------------------------------------------------------------------------------------------------------|
| Arginase1 | 1WVA, 1WVB, 2AEB, 2PHA, 2PHO, 2PLL, 2ZAV, 3DJ8, 3E6K, 3E6V, 3F80, 3GMZ, 3GN0, 3KV2, 3LP4, 3LP7, 3MFV, 3MFW, 3MJL, 3SJT, 3SKK, 3TF3, 3TH7, 3THE, 3THH, 3THJ, 4FCI, 4FCK, 4GSM, 4GSV, 4GSZ, 4GWC, 4GWD, 4HWW, 4HXQ, 4IE1, 6Q92, 6Q9P, 6QAF, 6V7C, 6V7D, 6V7E, 6V7F |
| Arginase2 | 1PQ3, 4HZE, 4I06, 4IE2, 4IE3, 4IXU, 4IXV, 6Q37, 6Q39, 6SS2, 6SS4, 6SS6, 6SRV, 6SRX, 6SS0, 6SS5, 6TUL                                                                                                                                                             |
