# Supplementary material for: Virtual Screening for FDA-Approved Drugs That Selectively Inhibit Arginase Type 1 and 2
Source: Molecules. 2022 Aug 12;27(16):5134. doi: 10.3390/molecules27165134 (PMC9416497; doi:10.3390/molecules27165134)
Supplement: Supplementary file 1 [file molecules-27-05134-s001.zip]

Archive with 15 entries (15 files):
- Figure S1.png
- Figure S2.png
- Figure S3.png
- Supplementary_information_legends.pdf
- Table S1.pdf
- Table S10.xlsx
- Table S11.xlsx
- Table S2.xlsx
- Table S3.xlsx
- Table S4.xlsx
- Table S5.xlsx
- Table S6.xlsx
- Table S7.xlsx
- Table S8.xlsx
- Table S9.xlsx
