# Supplementary material for: Virtual Screening for FDA-Approved Drugs That Selectively Inhibit Arginase Type 1 and 2
Source: Molecules. 2022 Aug 12;27(16):5134. doi: 10.3390/molecules27165134 (PMC9416497; doi:10.3390/molecules27165134)
Supplement: Supplementary file 1 [file molecules-27-05134-s001.zip › Table S2.xlsx]

## Sheet: kd_calculation
LIGAND	kd arg1	exp. (nm)	4HWW	4HXQ	3SJT	Average deltaG Arg1	Pred. Kd arg1	pred. (um) arg1	ki arg2	exp.(nm)	4HZE	4I06	4IXU	Average deltaG Arg2	Pred. Kd arg2	pred. (um) arg2
ABH	5 nM	5	-6.1	-6.3	-6.1	-6.16667	28.9 um 2.89x10^-5	28	Ph 7.5- 0.25 μM, Ph 9.5 – 8.5 nM	129.25	-6.1	-6.4	-6.3	-6.26667	24.4 um 2.44x10^-5	24.4
nor NOHA	0.047 μM (itc). 517 nM (spr)	282	-6.1	-6.2	-6.3	-6.2	27.5 um 2.75x10^-5	27.5	51 nM	51	-6.3	-6.5	-6.3	-6.36667	20.6 um 2.06x10^-5	20.6
NOHA	K d (pH 8.5) = 3.6 μM	3600	-5.8	-5.9	-6.1	-5.93333	43.6 um 4.36x10^-5	43.6	K i (pH 7.5) = 1.6 μM K i (pH 9.5) = 2 μM	1800	-6.3	-6.6	-6.7	-6.53333	15.7 um 1.57x10^-5	15.7
S-(2-Boronoethyl)-l-Cysteine (BEC)	Ki 0.4–0.6 μM	500	-6	-6.2	-5.9	-6.03333	36.8 um 3.68x10^-5	36.8	0.31 μM	310	-6	-6.3	-6.4	-6.23333	26.1 um 2.61x10^-5	26.1
6-nitro-L-norleucine	60uM	60000	-5.9	-5.9	-5.8	-5.86667	48.2 um 4.82x10^-5	48.2	6mM	6000000	-6.1	-6.1	-6.1	-6.1	32.5 um 3.25x10^-5	32.5
													—

## Sheet: exp_vs_prd_Kd
	Ligand	experimental (nM)	predicted (nM)
	ABH	5	28000
	Nor-NOHA	282	27500
Arg1	NOHA	3600	43600
	S-(2-Boronoethyl)-l-Cysteine (BEC)	500	36800
	Nitro	60000	48200
		experimental	predicted
	ABH	129.25	24400
	Nor-NOHA	51	20600
Arg2	NOHA	1800	15700
	S-(2-Boronoethyl)-l-Cysteine (BEC)	310	26100
	Nitro	6000000	32500

## Sheet: arg1_vs_arg2_selectivity
	Ligand	Arg1_Kd (nM)	Arg2_Kd (nM)	selectivity		exp_selectivity	pred_selectivity
	ABH	5	129.25	0.0386847		0.0386847	1.14754
	Nor-NOHA	282	51	5.52941		5.52941	1.33495
experimental	NOHA	3600	1800	2		2	2.77707
	S-(2-Boronoethyl)-l-Cysteine (BEC)	500	310	1.6129		1.6129	1.40996
	Nitro	60000	6000000	0.01		0.01	1.48308
	ABH	28000	24400	1.14754
	Nor-NOHA	27500	20600	1.33495
	NOHA	43600	15700	2.77707
predicted	S-(2-Boronoethyl)-l-Cysteine (BEC)	36800	26100	1.40996
	Nitro	48200	32500	1.48308

## Sheet: RMSD_redocking
4hze	1.477
4ixu	2.849
4i06	2.411
4hww	2.121
3sjt	2.144
4hxq	2.091
