# Supplementary material for: Virtual Screening for FDA-Approved Drugs That Selectively Inhibit Arginase Type 1 and 2
Source: Molecules. 2022 Aug 12;27(16):5134. doi: 10.3390/molecules27165134 (PMC9416497; doi:10.3390/molecules27165134)
Supplement: Supplementary file 1 [file molecules-27-05134-s001.zip › Table S3.xlsx]

## Sheet: energy_average_arg1_structures
LIGAND_NAME	ZINC_ID	Drug_name	4hww	4hxq	3sjt	Average	Standard_deviation
fda_ligand_0001.pdbqt	ZINC000001530427	fosfomycin	-4.5	-4.5	-5.1	-4.7	0.34641
fda_ligand_0002.pdbqt	ZINC000001530427	fosfomycin	-4.5	-4.5	-4.5	-4.5	0
fda_ligand_0003.pdbqt	ZINC000001530427	fosfomycin	-4.5	-4.5	-4.5	-4.5	0
fda_ligand_0004.pdbqt	ZINC000003807804	mycelex	-5.9	-5.7	-6.7	-6.1	0.52915
fda_ligand_0005.pdbqt	ZINC000003807804	mycelex	-5.9	-5.6	-7.9	-6.46667	1.25033
fda_ligand_0006.pdbqt	ZINC000000120286	triamteril	-7.5	-7.3	-7.5	-7.43333	0.11547
fda_ligand_0007.pdbqt	ZINC000000008492	oxyquinoline	-5.4	-5.5	-5.9	-5.6	0.264575
fda_ligand_0008.pdbqt	ZINC000003607120	zymar	-6.4	-6.2	-6.4	-6.33333	0.11547
fda_ligand_0009.pdbqt	ZINC000003607120	zymar	-6.7	-6.3	-6.4	-6.46667	0.208167
fda_ligand_0010.pdbqt	ZINC000001612996	irinotecan	-7.9	-8.5	-8.3	-8.23333	0.305505
fda_ligand_0011.pdbqt	ZINC000000001673	melphalan	-5.2	-5.2	-5.5	-5.3	0.173205
fda_ligand_0012.pdbqt	ZINC000000896546	5-fc	-5.8	-5.7	-6	-5.83333	0.152753
fda_ligand_0013.pdbqt	ZINC000000896546	5-fc	-5.8	-5.7	-6.1	-5.86667	0.208167
fda_ligand_0014.pdbqt	ZINC000051133897	piroxicam	-6.9	-6.9	-8.1	-7.3	0.69282
fda_ligand_0015.pdbqt	ZINC000004658290	mercaptopurine	-5.7	-5.9	-5.7	-5.76667	0.11547
fda_ligand_0016.pdbqt	ZINC000004658290	mercaptopurine	-5.7	-5.7	-5.7	-5.7	0
fda_ligand_0017.pdbqt	ZINC000001529323	methotrexate	-7.7	-7.8	-7.6	-7.7	0.1
fda_ligand_0018.pdbqt	ZINC000095616601	prazosin	-6.5	-6.5	-6.7	-6.56667	0.11547
fda_ligand_0019.pdbqt	ZINC000095616601	prazosin	-6.4	-6.3	-6.9	-6.53333	0.321455
fda_ligand_0020.pdbqt	ZINC000014961096	alogliptin	-6.6	-6.4	-7.1	-6.7	0.360555
fda_ligand_0021.pdbqt	ZINC000001633887	octinoxate	-5.4	-5.3	-5.8	-5.5	0.264575
fda_ligand_0022.pdbqt	ZINC000002005305	5-methyltetrahydrofolate	-7.4	-7.9	-7.6	-7.63333	0.251661
fda_ligand_0023.pdbqt	ZINC000002005305	5-methyltetrahydrofolate	-7.9	-8.4	-8.2	-8.16667	0.251661
fda_ligand_0024.pdbqt	ZINC000002005305	5-methyltetrahydrofolate	-7.9	-8.3	-8	-8.06667	0.208167
fda_ligand_0025.pdbqt	ZINC000003861806	podofilox	-7.4	-7.9	-7.7	-7.66667	0.251661
fda_ligand_0026.pdbqt	ZINC000100009383	ZINC100009383	-5.4	-5.8	-5.7	-5.63333	0.208167
fda_ligand_0027.pdbqt	ZINC000000018635	frovatriptan	-7.2	-7.3	-7.4	-7.3	0.1
fda_ligand_0028.pdbqt	ZINC000002548959	ZINC2548959	-6.9	-6.8	-7.4	-7.03333	0.321455
fda_ligand_0029.pdbqt	ZINC000003831405	quinidine	-6.3	-6.4	-6.9	-6.53333	0.321455
fda_ligand_0030.pdbqt	ZINC000003831405	quinidine	-6.3	-6.4	-6.9	-6.53333	0.321455
fda_ligand_0031.pdbqt	ZINC000003831404	quinine	-6.7	-6.9	-6.7	-6.76667	0.11547
fda_ligand_0032.pdbqt	ZINC000003831404	quinine	-6.7	-6.9	-6.7	-6.76667	0.11547
fda_ligand_0033.pdbqt	ZINC000000389747	naloxone	-7.3	-7.4	-8	-7.56667	0.378594
fda_ligand_0034.pdbqt	ZINC000000389747	naloxone	-6.7	-6.9	-7.3	-6.96667	0.305505
fda_ligand_0035.pdbqt	ZINC000000389747	naloxone	-6.9	-6.8	-7.6	-7.1	0.43589
fda_ligand_0036.pdbqt	ZINC000085205448	ZINC85205448	-6.5	-6.5	-6.9	-6.63333	0.23094
fda_ligand_0037.pdbqt	ZINC000000967520	camphor	-5.3	-5.3	-5.5	-5.36667	0.11547
fda_ligand_0038.pdbqt	ZINC000001633889	octinoxate	-5.1	-5.3	-5.6	-5.33333	0.251661
fda_ligand_0039.pdbqt	ZINC000003830635	dfo	-4.8	-5.3	-6.1	-5.4	0.655744
fda_ligand_0040.pdbqt	ZINC000026011099	omacetaxine mepesuccinate	-6.7	-6.5	-6.7	-6.63333	0.11547
fda_ligand_0041.pdbqt	ZINC000026011099	omacetaxine mepesuccinate	-7	-7	-8.1	-7.36667	0.635085
fda_ligand_0042.pdbqt	ZINC000000005560	ketoprofen	-6.4	-6.1	-7.1	-6.53333	0.51316
fda_ligand_0043.pdbqt	ZINC000000005823	demadex	-6.3	-6.8	-8	-7.03333	0.873689
fda_ligand_0044.pdbqt	ZINC000000005823	demadex	-6.4	-6.6	-8.5	-7.16667	1.15902
fda_ligand_0045.pdbqt	ZINC000000005823	demadex	-6.4	-6.7	-8.3	-7.13333	1.02144
fda_ligand_0046.pdbqt	ZINC000000005823	demadex	-6.3	-6.6	-8	-6.96667	0.907377
fda_ligand_0047.pdbqt	ZINC000000005895	rizatriptan	-5.9	-5.8	-6.5	-6.06667	0.378594
fda_ligand_0048.pdbqt	ZINC000000006016	effexor	-5.4	-6	-6.3	-5.9	0.458258
fda_ligand_0049.pdbqt	ZINC000000006016	effexor	-5.8	-6	-6.3	-6.03333	0.251661
fda_ligand_0050.pdbqt	ZINC000000602128	bepotastine	-6.4	-6.2	-7.1	-6.56667	0.472582
fda_ligand_0051.pdbqt	ZINC000000607939	isradipin	-7.5	-7	-7.5	-7.33333	0.288675
fda_ligand_0052.pdbqt	ZINC000000608382	flavoxate	-5.9	-6.1	-7	-6.33333	0.585947
fda_ligand_0053.pdbqt	ZINC000000608382	flavoxate	-6.1	-6.1	-6	-6.06667	0.057735
fda_ligand_0054.pdbqt	ZINC000002568036	dantrolene	-6.5	-6.5	-6.8	-6.6	0.173205
fda_ligand_0055.pdbqt	ZINC000002568036	dantrolene	-6.5	-6.5	-6.6	-6.53333	0.057735
fda_ligand_0056.pdbqt	ZINC000002570817	bromfenac	-7	-6.8	-7.1	-6.96667	0.152753
fda_ligand_0057.pdbqt	ZINC000002599970	formoterol	-5.6	-6.7	-6.3	-6.2	0.556776
fda_ligand_0058.pdbqt	ZINC000002599970	formoterol	-6.5	-6.4	-6.4	-6.43333	0.057735
fda_ligand_0059.pdbqt	ZINC000003956788	alinia	-6.7	-6.7	-6.7	-6.7	0
fda_ligand_0060.pdbqt	ZINC000100003902	maraviroc	-7.3	-7.4	-7.4	-7.36667	0.057735
fda_ligand_0061.pdbqt	ZINC000100003902	maraviroc	-7.3	-7.3	-7.2	-7.26667	0.057735
fda_ligand_0062.pdbqt	ZINC000000025958	rucaparib	-7.1	-7	-7.2	-7.1	0.1
fda_ligand_0063.pdbqt	ZINC000000607986	ZINC607986	-6.8	-7.3	-7.8	-7.3	0.5
fda_ligand_0064.pdbqt	ZINC000000607986	ZINC607986	-5.9	-6.1	-6.7	-6.23333	0.416333
fda_ligand_0065.pdbqt	ZINC000001530737	ZINC1530737	-5.2	-5.5	-5.6	-5.43333	0.208167
fda_ligand_0066.pdbqt	ZINC000001530737	ZINC1530737	-5.5	-5.5	-5.5	-5.5	0
fda_ligand_0067.pdbqt	ZINC000001690604	hydroxyamphetamine	-5	-5.5	-5.7	-5.4	0.360555
fda_ligand_0068.pdbqt	ZINC000003816287	axitinib	-7.7	-7.9	-7.7	-7.76667	0.11547
fda_ligand_0069.pdbqt	ZINC000003831551	tiopronin	-5.4	-5.3	-5.3	-5.33333	0.057735
fda_ligand_0070.pdbqt	ZINC000003991624	vilanterol	-6	-5.9	-6.2	-6.03333	0.152753
fda_ligand_0071.pdbqt	ZINC000004216238	ZINC4216238	-6.8	-6.8	-7.8	-7.13333	0.57735
fda_ligand_0072.pdbqt	ZINC000008466459	levmetamfetamine	-5	-5.1	-5.3	-5.13333	0.152753
fda_ligand_0073.pdbqt	ZINC000014881137	didecyl-dimethyl-ammonium	-3.9	-3.6	-3.4	-3.63333	0.251661
fda_ligand_0074.pdbqt	ZINC000034089131	ZINC34089131	-7.6	-6.9	-6.9	-7.13333	0.404145
fda_ligand_0075.pdbqt	ZINC000053084692	safinamide	-6.1	-5.9	-6.4	-6.13333	0.251661
fda_ligand_0076.pdbqt	ZINC000053084692	safinamide	-6.1	-6.4	-6.3	-6.26667	0.152753
fda_ligand_0077.pdbqt	ZINC000100070954	ZINC100070954	-6.8	-6.7	-7.2	-6.9	0.264575
fda_ligand_0078.pdbqt	ZINC000100014475	orfadin	-7.1	-7	-7.6	-7.23333	0.321455
fda_ligand_0079.pdbqt	ZINC000000002299	ZINC2299	-6.5	-6.3	-6.6	-6.46667	0.152753
fda_ligand_0080.pdbqt	ZINC000000002299	ZINC2299	-6.3	-6.1	-6.9	-6.43333	0.416333
fda_ligand_0081.pdbqt	ZINC000000002299	ZINC2299	-6.2	-6.1	-6.5	-6.26667	0.208167
fda_ligand_0082.pdbqt	ZINC000000896666	tranylcypromine	-4.6	-4.6	-5	-4.73333	0.23094
fda_ligand_0083.pdbqt	ZINC000001554010	gabapentin	-5.6	-6.2	-6.4	-6.06667	0.416333
fda_ligand_0084.pdbqt	ZINC000003830960	iopromide	-4.9	-4.8	-5.8	-5.16667	0.550757
fda_ligand_0085.pdbqt	ZINC000004212809	deflazacort	-8.5	-8.8	-8.7	-8.66667	0.152753
fda_ligand_0086.pdbqt	ZINC000004658603	aha	-5	-5	-4.6	-4.86667	0.23094
fda_ligand_0087.pdbqt	ZINC000004658603	aha	-4.6	-4.5	-4.2	-4.43333	0.208167
fda_ligand_0088.pdbqt	ZINC000008101127	indocyanine green	-7	-7.3	-7.5	-7.26667	0.251661
fda_ligand_0089.pdbqt	ZINC000013587680	iloprost	-6.6	-6.6	-6.6	-6.6	0
fda_ligand_0090.pdbqt	ZINC000028108825	gadofosveset	-6.6	-6.5	-7.2	-6.76667	0.378594
fda_ligand_0091.pdbqt	ZINC000028108825	gadofosveset	-6.8	-6.5	-7.2	-6.83333	0.351188
fda_ligand_0092.pdbqt	ZINC000028108825	gadofosveset	-6.8	-6.8	-7.4	-7	0.34641
fda_ligand_0093.pdbqt	ZINC000100013500	ZINC100013500	-6.5	-6.2	-6.3	-6.33333	0.152753
fda_ligand_0094.pdbqt	ZINC000100013500	ZINC100013500	-6.4	-6.1	-6.2	-6.23333	0.152753
fda_ligand_0095.pdbqt	ZINC000003833846	nelfinavir	-6.5	-6.7	-7.1	-6.76667	0.305505
fda_ligand_0096.pdbqt	ZINC000003833846	nelfinavir	-6.8	-6.9	-6.6	-6.76667	0.152753
fda_ligand_0097.pdbqt	ZINC000003833846	nelfinavir	-6.5	-6.8	-6.7	-6.66667	0.152753
fda_ligand_0098.pdbqt	ZINC000003927200	yaz	-8.1	-8.2	-7.8	-8.03333	0.208167
fda_ligand_0099.pdbqt	ZINC000008214635	alli	-4.8	-5.3	-4.9	-5	0.264575
fda_ligand_0100.pdbqt	ZINC000012360535	hydralazine	-6.2	-6.4	-6.8	-6.46667	0.305505
fda_ligand_0101.pdbqt	ZINC000012360535	hydralazine	-6.3	-6.4	-6.4	-6.36667	0.057735
fda_ligand_0102.pdbqt	ZINC000012360535	hydralazine	-6.6	-6.6	-7	-6.73333	0.23094
fda_ligand_0103.pdbqt	ZINC000019364219	ethambutol	-4.2	-5.1	-5.4	-4.9	0.6245
fda_ligand_0104.pdbqt	ZINC000019364219	ethambutol	-4.4	-5.1	-5.4	-4.96667	0.51316
fda_ligand_0105.pdbqt	ZINC000003813010	fluorodeoxyuridine	-6.3	-6.5	-7.5	-6.76667	0.64291
fda_ligand_0106.pdbqt	ZINC000003813010	fluorodeoxyuridine	-6.5	-6.8	-7.6	-6.96667	0.568624
fda_ligand_0107.pdbqt	ZINC000003806063	rapaflo	-6.1	-5.4	-6.7	-6.06667	0.650641
fda_ligand_0108.pdbqt	ZINC000000004448	zofran	-6.9	-7.1	-6.6	-6.86667	0.251661
fda_ligand_0109.pdbqt	ZINC000000004448	zofran	-6.8	-6.9	-6.6	-6.76667	0.152753
fda_ligand_0110.pdbqt	ZINC000009212654	retin-a	-6	-5.8	-6.3	-6.03333	0.251661
fda_ligand_0111.pdbqt	ZINC000000538564	casodex	-6.8	-6.7	-6.6	-6.7	0.1
fda_ligand_0112.pdbqt	ZINC000019632718	nimotop	-7.1	-7.2	-6.5	-6.93333	0.378594
fda_ligand_0113.pdbqt	ZINC000000897251	donepezil	-6.7	-6.9	-6.6	-6.73333	0.152753
fda_ligand_0114.pdbqt	ZINC000000897251	donepezil	-6.7	-6.8	-6.6	-6.7	0.1
fda_ligand_0115.pdbqt	ZINC000000968326	pioglitazone	-6.6	-6.4	-6.3	-6.43333	0.152753
fda_ligand_0116.pdbqt	ZINC000000968326	pioglitazone	-6.4	-6.4	-6.6	-6.46667	0.11547
fda_ligand_0117.pdbqt	ZINC000000968345	butabarbital	-6.5	-6.7	-6.7	-6.63333	0.11547
fda_ligand_0118.pdbqt	ZINC000000968345	butabarbital	-6.5	-6.7	-6.7	-6.63333	0.11547
fda_ligand_0119.pdbqt	ZINC000001554588	acamprosate	-6	-6	-5.8	-5.93333	0.11547
fda_ligand_0120.pdbqt	ZINC000003830569	clavulanate	-6.7	-6.7	-7.2	-6.86667	0.288675
fda_ligand_0121.pdbqt	ZINC000000592419	daxas	-6.6	-6.8	-6.8	-6.73333	0.11547
fda_ligand_0122.pdbqt	ZINC000021297660	cellcept	-5.9	-6.2	-6.5	-6.2	0.3
fda_ligand_0123.pdbqt	ZINC000021297660	cellcept	-6.1	-6	-6.2	-6.1	0.1
fda_ligand_0124.pdbqt	ZINC000001530555	acyclovir	-6.8	-7.1	-7.4	-7.1	0.3
fda_ligand_0125.pdbqt	ZINC000009224016	milrinone	-5.7	-6	-6.1	-5.93333	0.208167
fda_ligand_0126.pdbqt	ZINC000009224016	milrinone	-5.7	-5.9	-6.5	-6.03333	0.416333
fda_ligand_0127.pdbqt	ZINC000019632713	nimotop	-7.2	-7.1	-7.3	-7.2	0.1
fda_ligand_0128.pdbqt	ZINC000003944422	norvir	-5.8	-6.2	-6.7	-6.23333	0.450925
fda_ligand_0129.pdbqt	ZINC000008403947	phentermine	-5	-5	-5	-5	0
fda_ligand_0130.pdbqt	ZINC000052955754	ergotamine	-8.6	-7.9	-8.1	-8.2	0.360555
fda_ligand_0131.pdbqt	ZINC000052955754	ergotamine	-8.7	-8.4	-8.4	-8.5	0.173205
fda_ligand_0132.pdbqt	ZINC000052955754	ergotamine	-8.7	-8.4	-8.5	-8.53333	0.152753
fda_ligand_0133.pdbqt	ZINC000003815424	mestranol	-6	-6.2	-6.7	-6.3	0.360555
fda_ligand_0134.pdbqt	ZINC000004097383	pancuronium	-6.6	-6.9	-6.2	-6.56667	0.351188
fda_ligand_0135.pdbqt	ZINC000003960338	rozerem	-6.2	-6.5	-7.1	-6.6	0.458258
fda_ligand_0136.pdbqt	ZINC000003861768	ZINC3861768	-6.5	-7.5	-8.7	-7.56667	1.10151
fda_ligand_0137.pdbqt	ZINC000000538266	quazepam	-6.7	-6.2	-6.4	-6.43333	0.251661
fda_ligand_0138.pdbqt	ZINC000012503291	spiriva	-6.4	-6.4	-6.7	-6.5	0.173205
fda_ligand_0139.pdbqt	ZINC000000113442	metronidazole	-5.9	-6	-6	-5.96667	0.057735
fda_ligand_0140.pdbqt	ZINC000001538857	bosentan	-6.5	-7.3	-7.6	-7.13333	0.568624
fda_ligand_0141.pdbqt	ZINC000001542392	alfuzosin	-5.7	-6	-6.1	-5.93333	0.208167
fda_ligand_0142.pdbqt	ZINC000001542392	alfuzosin	-6.4	-6.2	-6.1	-6.23333	0.152753
fda_ligand_0143.pdbqt	ZINC000001542392	alfuzosin	-6.5	-6.1	-7.3	-6.63333	0.61101
fda_ligand_0144.pdbqt	ZINC000003820029	trajenta	-6.8	-6.9	-7.3	-7	0.264575
fda_ligand_0145.pdbqt	ZINC000011616925	folotyn	-7.4	-7.3	-7.1	-7.26667	0.152753
fda_ligand_0146.pdbqt	ZINC000022056030	emsam	-4.9	-4.9	-5.5	-5.1	0.34641
fda_ligand_0147.pdbqt	ZINC000022056030	emsam	-4.7	-4.7	-5.4	-4.93333	0.404145
fda_ligand_0148.pdbqt	ZINC000022056030	emsam	-4.7	-4.7	-5.4	-4.93333	0.404145
fda_ligand_0149.pdbqt	ZINC000000004778	nev	-6.6	-6.7	-6.6	-6.63333	0.057735
fda_ligand_0150.pdbqt	ZINC000000000746	terbutaline	-5.9	-5.9	-6	-5.93333	0.057735
fda_ligand_0151.pdbqt	ZINC000000136138	oxybenzone	-6.5	-6.4	-7.2	-6.7	0.43589
fda_ligand_0152.pdbqt	ZINC000000136138	oxybenzone	-6.3	-6.4	-6.9	-6.53333	0.321455
fda_ligand_0153.pdbqt	ZINC000001530752	oxybutynin	-5.1	-5.1	-5.5	-5.23333	0.23094
fda_ligand_0154.pdbqt	ZINC000001530752	oxybutynin	-5.1	-5.3	-5.6	-5.33333	0.251661
fda_ligand_0155.pdbqt	ZINC000002005550	secobarbital	-6.5	-6.8	-6.7	-6.66667	0.152753
fda_ligand_0156.pdbqt	ZINC000002005550	secobarbital	-6.5	-6.8	-7	-6.76667	0.251661
fda_ligand_0157.pdbqt	ZINC000003938704	ellence	-6.9	-6.9	-7.3	-7.03333	0.23094
fda_ligand_0158.pdbqt	ZINC000003938704	ellence	-7	-7	-7.4	-7.13333	0.23094
fda_ligand_0159.pdbqt	ZINC000029416466	sqv	-7.6	-7.7	-7.4	-7.56667	0.152753
fda_ligand_0160.pdbqt	ZINC000029416466	sqv	-6.5	-7.5	-7.2	-7.06667	0.51316
fda_ligand_0161.pdbqt	ZINC000029416466	sqv	-6	-6.8	-6	-6.26667	0.46188
fda_ligand_0162.pdbqt	ZINC000003812944	flutamide	-6.2	-6.3	-6.5	-6.33333	0.152753
fda_ligand_0163.pdbqt	ZINC000000538509	trimethobenzamide	-6.2	-6.4	-6.3	-6.3	0.1
fda_ligand_0164.pdbqt	ZINC000000538509	trimethobenzamide	-6.3	-6.2	-6.2	-6.23333	0.057735
fda_ligand_0165.pdbqt	ZINC000001482049	droxidopa	-6.4	-6.5	-7.1	-6.66667	0.378594
fda_ligand_0166.pdbqt	ZINC000001482049	droxidopa	-6.4	-6.5	-7.1	-6.66667	0.378594
fda_ligand_0167.pdbqt	ZINC000242437513	ZINC242437513	-5.5	-5.7	-5.9	-5.7	0.2
fda_ligand_0168.pdbqt	ZINC000003784120	iloprost	-6.1	-6.3	-6	-6.13333	0.152753
fda_ligand_0169.pdbqt	ZINC000003830958	iopromide	-5.3	-5.2	-5.2	-5.23333	0.057735
fda_ligand_0170.pdbqt	ZINC000016159083	pimavanserin	-6.3	-6	-6.3	-6.2	0.173205
fda_ligand_0171.pdbqt	ZINC000016159083	pimavanserin	-6.3	-6.1	-6.2	-6.2	0.1
fda_ligand_0172.pdbqt	ZINC000022851765	eovist	-6.5	-6.6	-6.2	-6.43333	0.208167
fda_ligand_0173.pdbqt	ZINC000022851765	eovist	-7	-6.4	-6.3	-6.56667	0.378594
fda_ligand_0174.pdbqt	ZINC000022851765	eovist	-7	-6.5	-6.5	-6.66667	0.288675
fda_ligand_0175.pdbqt	ZINC000028232750	valstar	-7.3	-7	-8.4	-7.56667	0.737111
fda_ligand_0176.pdbqt	ZINC000028232750	valstar	-7.3	-7.1	-8.1	-7.5	0.52915
fda_ligand_0177.pdbqt	ZINC000028232750	valstar	-7.7	-7	-8.6	-7.76667	0.802081
fda_ligand_0178.pdbqt	ZINC000028639340	noxafil	-6.4	-6.9	-7.4	-6.9	0.5
fda_ligand_0179.pdbqt	ZINC000003794601	citalopram	-6.4	-5.9	-6.6	-6.3	0.360555
fda_ligand_0180.pdbqt	ZINC000003813003	klonopin	-7	-7.1	-7.7	-7.26667	0.378594
fda_ligand_0181.pdbqt	ZINC000004258316	azathioprine	-7.6	-7.7	-7.8	-7.7	0.1
fda_ligand_0182.pdbqt	ZINC000001543873	shh	-6.7	-6.3	-6.6	-6.53333	0.208167
fda_ligand_0183.pdbqt	ZINC000001543873	shh	-6.3	-5.9	-6.4	-6.2	0.264575
fda_ligand_0184.pdbqt	ZINC000001846431	ZINC1846431	-5.4	-5.7	-5.8	-5.63333	0.208167
fda_ligand_0185.pdbqt	ZINC000003818726	belinostat	-8.1	-8.1	-8.1	-8.1	0
fda_ligand_0186.pdbqt	ZINC000003818726	belinostat	-8.2	-8.1	-8.1	-8.13333	0.057735
fda_ligand_0187.pdbqt	ZINC000003843378	tecfidera	-5.4	-5.4	-5.3	-5.36667	0.057735
fda_ligand_0188.pdbqt	ZINC000005844788	ZINC5844788	-6.4	-6.4	-8.1	-6.96667	0.981495
fda_ligand_0189.pdbqt	ZINC000005844788	ZINC5844788	-6.5	-7.4	-7.6	-7.16667	0.585947
fda_ligand_0190.pdbqt	ZINC000253498282	ZINC253498282	-6.3	-6.4	-6.9	-6.53333	0.321455
fda_ligand_0191.pdbqt	ZINC000014164617	obeticholic acid	-6.6	-6.9	-6.7	-6.73333	0.152753
fda_ligand_0192.pdbqt	ZINC000100008319	ZINC100008319	-6.5	-6.6	-6.3	-6.46667	0.152753
fda_ligand_0193.pdbqt	ZINC000100061056	ZINC100061056	-5.2	-5.2	-5.3	-5.23333	0.057735
fda_ligand_0194.pdbqt	ZINC000003800008	dostinex	-6	-6.1	-6.3	-6.13333	0.152753
fda_ligand_0195.pdbqt	ZINC000003800008	dostinex	-6	-6.1	-6.3	-6.13333	0.152753
fda_ligand_0196.pdbqt	ZINC000003800008	dostinex	-6.5	-6.6	-6.3	-6.46667	0.152753
fda_ligand_0197.pdbqt	ZINC000003830347	butalbital	-6.9	-6.8	-6.7	-6.8	0.1
fda_ligand_0198.pdbqt	ZINC000003830347	butalbital	-6.8	-6.8	-6.7	-6.76667	0.057735
fda_ligand_0199.pdbqt	ZINC000003921872	dovonex	-6.6	-6.7	-6.5	-6.6	0.1
fda_ligand_0200.pdbqt	ZINC000012404516	toremifene	-5	-5.2	-6	-5.4	0.52915
fda_ligand_0201.pdbqt	ZINC000012404516	toremifene	-5	-5.3	-6.2	-5.5	0.6245
fda_ligand_0202.pdbqt	ZINC000000002101	avc	-5.6	-5.8	-6.2	-5.86667	0.305505
fda_ligand_0203.pdbqt	ZINC000001530751	oxybutynin	-5.6	-5.5	-6.1	-5.73333	0.321455
fda_ligand_0204.pdbqt	ZINC000001530751	oxybutynin	-5.6	-5.3	-6	-5.63333	0.351188
fda_ligand_0205.pdbqt	ZINC000001530981	terbinafine	-5.5	-5.7	-5.9	-5.7	0.2
fda_ligand_0206.pdbqt	ZINC000001530981	terbinafine	-5.3	-5.4	-5.7	-5.46667	0.208167
fda_ligand_0207.pdbqt	ZINC000001530981	terbinafine	-5.5	-5	-5.6	-5.36667	0.321455
fda_ligand_0208.pdbqt	ZINC000001530862	primaquine	-6.1	-5.5	-5.8	-5.8	0.3
fda_ligand_0209.pdbqt	ZINC000003824921	fexofenadine	-5.6	-5.8	-5.9	-5.76667	0.152753
fda_ligand_0210.pdbqt	ZINC000053229445	rocuronium	-5.9	-5.8	-5.9	-5.86667	0.057735
fda_ligand_0211.pdbqt	ZINC000053229445	rocuronium	-5.9	-5.6	-5.8	-5.76667	0.152753
fda_ligand_0212.pdbqt	ZINC000000002041	ropinirole	-5.8	-5.9	-5.9	-5.86667	0.057735
fda_ligand_0213.pdbqt	ZINC000068153186	dabrafenib	-7.7	-8	-7.8	-7.83333	0.152753
fda_ligand_0214.pdbqt	ZINC000068153186	dabrafenib	-7.5	-7.9	-7.9	-7.76667	0.23094
fda_ligand_0215.pdbqt	ZINC000068202099	erismodegib	-7.1	-7	-7.5	-7.2	0.264575
fda_ligand_0216.pdbqt	ZINC000068204830	daclatasvir	-7.9	-6.8	-7.9	-7.53333	0.635085
fda_ligand_0217.pdbqt	ZINC000003872566	fexofenadine	-6.1	-6	-7.2	-6.43333	0.665833
fda_ligand_0218.pdbqt	ZINC000003872994	nizoral	-6.9	-6.7	-7.1	-6.9	0.2
fda_ligand_0219.pdbqt	ZINC000003872994	nizoral	-6.8	-7.1	-7.1	-7	0.173205
fda_ligand_0220.pdbqt	ZINC000000000061	baclofen	-5.6	-5.8	-6.2	-5.86667	0.305505
fda_ligand_0221.pdbqt	ZINC000000085733	baclofen	-5.8	-5.9	-6.2	-5.96667	0.208167
fda_ligand_0222.pdbqt	ZINC000001536109	folotyn	-7.3	-7.2	-7.4	-7.3	0.1
fda_ligand_0223.pdbqt	ZINC000001546066	erlotinib	-6.4	-6.9	-6.6	-6.63333	0.251661
fda_ligand_0224.pdbqt	ZINC000001530863	primaquine	-5.7	-5.3	-5.9	-5.63333	0.305505
fda_ligand_0225.pdbqt	ZINC000019632633	selegiline	-5	-5.1	-4.7	-4.93333	0.208167
fda_ligand_0226.pdbqt	ZINC000019632633	selegiline	-5.1	-4.7	-4.9	-4.9	0.2
fda_ligand_0227.pdbqt	ZINC000019632633	selegiline	-5	-5	-4.7	-4.9	0.173205
fda_ligand_0228.pdbqt	ZINC000003802690	baraclude	-7.4	-7.3	-8.2	-7.63333	0.493288
fda_ligand_0229.pdbqt	ZINC000003798750	sabril	-5	-5	-4.9	-4.96667	0.057735
fda_ligand_0230.pdbqt	ZINC000003874950	secobarbital	-6.5	-6.5	-6.5	-6.5	0
fda_ligand_0231.pdbqt	ZINC000003874950	secobarbital	-6.5	-6.7	-6.8	-6.66667	0.152753
fda_ligand_0232.pdbqt	ZINC000000895042	cysteine	-4.1	-4.2	-4.2	-4.16667	0.057735
fda_ligand_0233.pdbqt	ZINC000000895048	ifp	-4.1	-4.2	-4.5	-4.26667	0.208167
fda_ligand_0234.pdbqt	ZINC000000895316	glycol	-3.7	-3.9	-4.4	-4	0.360555
fda_ligand_0235.pdbqt	ZINC000000901791	oxyproline	-5.4	-5.4	-5.5	-5.43333	0.057735
fda_ligand_0236.pdbqt	ZINC000001531008	gluconate	-5.8	-5.7	-6.3	-5.93333	0.321455
fda_ligand_0237.pdbqt	ZINC000001532522	lysine	-5.1	-5.1	-5.1	-5.1	0
fda_ligand_0238.pdbqt	ZINC000002539702	fujiglucon	-6	-6.1	-6.1	-6.06667	0.057735
fda_ligand_0239.pdbqt	ZINC000003809490	taurine	-4.3	-4.3	-4.5	-4.36667	0.11547
fda_ligand_0240.pdbqt	ZINC000003830891	glutathione	-6	-6.4	-6.6	-6.33333	0.305505
fda_ligand_0241.pdbqt	ZINC000004474414	calderol	-6.4	-6.4	-7	-6.6	0.34641
fda_ligand_0242.pdbqt	ZINC000008214573	ZINC8214573	-4.5	-4.7	-4.7	-4.63333	0.11547
fda_ligand_0243.pdbqt	ZINC000008214573	ZINC8214573	-3.5	-3.7	-3.8	-3.66667	0.152753
fda_ligand_0244.pdbqt	ZINC000033943508	dcva	-6.2	-6	-5.7	-5.96667	0.251661
fda_ligand_0245.pdbqt	ZINC000000001011	benzoate	-5.3	-5.3	-5.2	-5.26667	0.057735
fda_ligand_0246.pdbqt	ZINC000000001411	eugenol	-5.7	-5.8	-5.7	-5.73333	0.057735
fda_ligand_0247.pdbqt	ZINC000000895318	glycol	-4	-4.1	-4.1	-4.06667	0.057735
fda_ligand_0248.pdbqt	ZINC000001530575	capsaicin	-5.6	-6.1	-6.1	-5.93333	0.288675
fda_ligand_0249.pdbqt	ZINC000003780893	simvastatin	-5.9	-5.8	-6.2	-5.96667	0.208167
fda_ligand_0250.pdbqt	ZINC000003875332	dexamethasone	-7.6	-7.7	-7.8	-7.7	0.1
fda_ligand_0251.pdbqt	ZINC000004095858	eprolin	-4.2	-5.1	-5	-4.76667	0.493288
fda_ligand_0252.pdbqt	ZINC000008577218	pga	-7.9	-7.7	-7.7	-7.76667	0.11547
fda_ligand_0253.pdbqt	ZINC000000643143	nizoral	-7.2	-6.8	-7.6	-7.2	0.4
fda_ligand_0254.pdbqt	ZINC000000643143	nizoral	-6.7	-6.5	-7.8	-7	0.7
fda_ligand_0255.pdbqt	ZINC000100015048	dn-101	-6.2	-6.4	-7.1	-6.56667	0.472582
fda_ligand_0256.pdbqt	ZINC000004474460	ZINC4474460	-5.9	-6.1	-6.2	-6.06667	0.152753
fda_ligand_0257.pdbqt	ZINC000004629876	daral	-6.5	-6.5	-6.3	-6.43333	0.11547
fda_ligand_0258.pdbqt	ZINC000004228257	kuvan	-6.4	-6.5	-8.2	-7.03333	1.0116
fda_ligand_0259.pdbqt	ZINC000004228257	kuvan	-6.7	-6.6	-7.3	-6.86667	0.378594
fda_ligand_0260.pdbqt	ZINC000004228257	kuvan	-6.4	-6.5	-7.7	-6.86667	0.723418
fda_ligand_0261.pdbqt	ZINC000003800706	citalopram	-5.9	-5.3	-6.5	-5.9	0.6
fda_ligand_0262.pdbqt	ZINC000001530303	ilopan	-5.8	-5.9	-6.3	-6	0.264575
fda_ligand_0263.pdbqt	ZINC000001532517	pyruvate	-4.3	-4.4	-4.2	-4.3	0.1
fda_ligand_0264.pdbqt	ZINC000001532805	ghb	-4.5	-4.6	-4.7	-4.6	0.1
fda_ligand_0265.pdbqt	ZINC000003807917	astenile	-6.9	-7.1	-7.2	-7.06667	0.152753
fda_ligand_0266.pdbqt	ZINC000003812851	enalaprilat	-6.8	-7	-7.9	-7.23333	0.585947
fda_ligand_0267.pdbqt	ZINC000003812851	enalaprilat	-6.8	-7.1	-6.9	-6.93333	0.152753
fda_ligand_0268.pdbqt	ZINC000003914810	degalol	-6.9	-7	-6.8	-6.9	0.1
fda_ligand_0269.pdbqt	ZINC000004658557	glypure	-4.5	-4.5	-4.2	-4.4	0.173205
fda_ligand_0270.pdbqt	ZINC000009212428	leucal	-7.9	-8	-7.9	-7.93333	0.057735
fda_ligand_0271.pdbqt	ZINC000009212428	leucal	-7.9	-7.7	-8.1	-7.9	0.2
fda_ligand_0272.pdbqt	ZINC000009212428	leucal	-7.9	-7.6	-7.9	-7.8	0.173205
fda_ligand_0273.pdbqt	ZINC000013585233	sapropterin	-6.7	-6.9	-7.9	-7.16667	0.64291
fda_ligand_0274.pdbqt	ZINC000013585233	sapropterin	-7	-7.6	-7.3	-7.3	0.3
fda_ligand_0275.pdbqt	ZINC000013585233	sapropterin	-6.9	-7.1	-7.6	-7.2	0.360555
fda_ligand_0276.pdbqt	ZINC000169621220	ZINC169621220	-7	-7.1	-7.1	-7.06667	0.057735
fda_ligand_0277.pdbqt	ZINC000000001084	caffeine	-5.6	-5.9	-6	-5.83333	0.208167
fda_ligand_0278.pdbqt	ZINC000000049153	thiamine	-6	-6.2	-6.6	-6.26667	0.305505
fda_ligand_0279.pdbqt	ZINC000100006770	vasc	-6	-6	-6.5	-6.16667	0.288675
fda_ligand_0280.pdbqt	ZINC000002036848	riboflavin	-7.6	-9	-7.8	-8.13333	0.757188
fda_ligand_0281.pdbqt	ZINC000002036848	riboflavin	-7.4	-8.7	-7.7	-7.93333	0.680686
fda_ligand_0282.pdbqt	ZINC000003830218	ampicillin	-6.8	-6.8	-7.1	-6.9	0.173205
fda_ligand_0283.pdbqt	ZINC000003830218	ampicillin	-6.8	-6.8	-6.9	-6.83333	0.057735
fda_ligand_0284.pdbqt	ZINC000003881958	danol	-6.7	-7	-7.3	-7	0.3
fda_ligand_0285.pdbqt	ZINC000018043251	theophylline	-6.3	-6.4	-7	-6.56667	0.378594
fda_ligand_0286.pdbqt	ZINC000034676245	d-cycloserine	-4.4	-4.4	-4.8	-4.53333	0.23094
fda_ligand_0287.pdbqt	ZINC000034676245	d-cycloserine	-4.4	-4.7	-5.3	-4.8	0.458258
fda_ligand_0288.pdbqt	ZINC000034676245	d-cycloserine	-4.4	-4.7	-5.3	-4.8	0.458258
fda_ligand_0289.pdbqt	ZINC000000002005	pza	-5.6	-5.6	-5.7	-5.63333	0.057735
fda_ligand_0290.pdbqt	ZINC000000000346	cuvposa	-6.1	-5.8	-6.9	-6.26667	0.568624
fda_ligand_0291.pdbqt	ZINC000000000506	milnacipran	-5.3	-5.7	-6	-5.66667	0.351188
fda_ligand_0292.pdbqt	ZINC000000004076	naratriptan	-6.4	-6.9	-7.4	-6.9	0.5
fda_ligand_0293.pdbqt	ZINC000000001899	penciclovir	-6.5	-6.8	-7.5	-6.93333	0.51316
fda_ligand_0294.pdbqt	ZINC000000020231	apraclonidine	-6.1	-6.1	-6.1	-6.1	0
fda_ligand_0295.pdbqt	ZINC000000020231	apraclonidine	-6.1	-6	-6.2	-6.1	0.1
fda_ligand_0296.pdbqt	ZINC000000004840	arava	-6.6	-6.9	-6.6	-6.7	0.173205
fda_ligand_0297.pdbqt	ZINC000000596731	tikosyn	-5.5	-4.8	-6.5	-5.6	0.8544
fda_ligand_0298.pdbqt	ZINC000000596731	tikosyn	-5.3	-6.1	-5.5	-5.63333	0.416333
fda_ligand_0299.pdbqt	ZINC000000896484	nexiclon	-5.8	-5.9	-6.1	-5.93333	0.152753
fda_ligand_0300.pdbqt	ZINC000000896484	nexiclon	-5.8	-5.7	-6.1	-5.86667	0.208167
fda_ligand_0301.pdbqt	ZINC000002570895	celebrex	-6.8	-6.8	-6.3	-6.63333	0.288675
fda_ligand_0302.pdbqt	ZINC000000602632	intelence	-6.3	-6.5	-6.5	-6.43333	0.11547
fda_ligand_0303.pdbqt	ZINC000084400879	nicardipine	-7.3	-5.9	-7	-6.73333	0.737111
fda_ligand_0304.pdbqt	ZINC000084400879	nicardipine	-7.1	-6.9	-6.6	-6.86667	0.251661
fda_ligand_0305.pdbqt	ZINC000084400879	nicardipine	-7.3	-6.9	-6.8	-7	0.264575
fda_ligand_0306.pdbqt	ZINC000019796087	nicardipine	-5.9	-6.1	-6.2	-6.06667	0.152753
fda_ligand_0307.pdbqt	ZINC000019796087	nicardipine	-6.2	-7.1	-7	-6.76667	0.493288
fda_ligand_0308.pdbqt	ZINC000019796087	nicardipine	-6	-7	-7.4	-6.8	0.72111
fda_ligand_0309.pdbqt	ZINC000000538275	raloxifene	-7.2	-7	-7	-7.06667	0.11547
fda_ligand_0310.pdbqt	ZINC000000538275	raloxifene	-7.1	-7.1	-7	-7.06667	0.057735
fda_ligand_0311.pdbqt	ZINC000000596881	econazole	-6.2	-5.7	-7.3	-6.4	0.818535
fda_ligand_0312.pdbqt	ZINC000000596881	econazole	-6.2	-5.7	-7.5	-6.46667	0.929157
fda_ligand_0313.pdbqt	ZINC000012414057	methylene blue	-5.4	-5.5	-6	-5.63333	0.321455
fda_ligand_0314.pdbqt	ZINC000000003876	ambien	-6	-6	-6.6	-6.2	0.34641
fda_ligand_0315.pdbqt	ZINC000000009342	desvenlafaxine	-5.9	-5.9	-6.8	-6.2	0.519615
fda_ligand_0316.pdbqt	ZINC000000009342	desvenlafaxine	-5.7	-5.9	-7	-6.2	0.7
fda_ligand_0317.pdbqt	ZINC000003079342	carbachol	-5.8	-5.7	-5.4	-5.63333	0.208167
fda_ligand_0318.pdbqt	ZINC000000004319	dilevalol	-6	-5.7	-7.5	-6.4	0.964365
fda_ligand_0319.pdbqt	ZINC000000004319	dilevalol	-6.4	-6.1	-7.4	-6.63333	0.680686
fda_ligand_0320.pdbqt	ZINC000000074836	ephedrine	-4.8	-4.9	-6	-5.23333	0.665833
fda_ligand_0321.pdbqt	ZINC000000601301	bhft	-7.7	-7.9	-8	-7.86667	0.152753
fda_ligand_0322.pdbqt	ZINC000004468778	cefixime	-7.5	-7.6	-8.3	-7.8	0.43589
fda_ligand_0323.pdbqt	ZINC000004474405	latisse	-5.7	-5.6	-6.4	-5.9	0.43589
fda_ligand_0324.pdbqt	ZINC000004693575	omeprazole	-6.6	-6.6	-6.6	-6.6	0
fda_ligand_0325.pdbqt	ZINC000004693575	omeprazole	-6.2	-6.1	-6.8	-6.36667	0.378594
fda_ligand_0326.pdbqt	ZINC000000020228	bupropion	-5.3	-5.2	-5.3	-5.26667	0.057735
fda_ligand_0327.pdbqt	ZINC000000020228	bupropion	-5.4	-5.6	-5.5	-5.5	0.1
fda_ligand_0328.pdbqt	ZINC000001542930	cesamet	-6.6	-6.4	-7	-6.66667	0.305505
fda_ligand_0329.pdbqt	ZINC000001550477	lapatinib	-7	-7.4	-7.6	-7.33333	0.305505
fda_ligand_0330.pdbqt	ZINC000001542113	vilazodone	-6.9	-7.3	-7.7	-7.3	0.4
fda_ligand_0331.pdbqt	ZINC000001542113	vilazodone	-8	-7.2	-7.6	-7.6	0.4
fda_ligand_0332.pdbqt	ZINC000000968310	esmirtazapine	-5.9	-6.5	-6.5	-6.3	0.34641
fda_ligand_0333.pdbqt	ZINC000000968310	esmirtazapine	-6.1	-6.2	-6.1	-6.13333	0.057735
fda_ligand_0334.pdbqt	ZINC000000968310	esmirtazapine	-5.9	-6.5	-6.5	-6.3	0.34641
fda_ligand_0335.pdbqt	ZINC000242437511	ZINC242437511	-5.4	-5.7	-6.1	-5.73333	0.351188
fda_ligand_0336.pdbqt	ZINC000245204949	ZINC245204949	-6.9	-7.2	-7.5	-7.2	0.3
fda_ligand_0337.pdbqt	ZINC000003875368	nitrofurantoin	-6.6	-6.7	-7.8	-7.03333	0.665833
fda_ligand_0338.pdbqt	ZINC000003875368	nitrofurantoin	-6.5	-7.1	-7.9	-7.16667	0.702377
fda_ligand_0339.pdbqt	ZINC000148723177	ZINC148723177	-6.4	-6.7	-6.3	-6.46667	0.208167
fda_ligand_0340.pdbqt	ZINC000148723177	ZINC148723177	-6.2	-6.5	-6.2	-6.3	0.173205
fda_ligand_0341.pdbqt	ZINC000004641374	doxercalciferol	-6.6	-6.7	-6.7	-6.66667	0.057735
fda_ligand_0342.pdbqt	ZINC000252679615	ZINC252679615	-6.5	-6.5	-6.6	-6.53333	0.057735
fda_ligand_0343.pdbqt	ZINC000252679615	ZINC252679615	-6.5	-6.5	-6.7	-6.56667	0.11547
fda_ligand_0344.pdbqt	ZINC000253530025	ZINC253530025	-6	-6.2	-6.6	-6.26667	0.305505
fda_ligand_0345.pdbqt	ZINC000013512456	teriflunomide	-5.7	-6.6	-6.3	-6.2	0.458258
fda_ligand_0346.pdbqt	ZINC000013512456	teriflunomide	-6.6	-6.8	-7.1	-6.83333	0.251661
fda_ligand_0347.pdbqt	ZINC000022065398	ZINC22065398	-6.7	-6.6	-6.7	-6.66667	0.057735
fda_ligand_0348.pdbqt	ZINC000031274852	ZINC31274852	-7.2	-7	-6.8	-7	0.2
fda_ligand_0349.pdbqt	ZINC000031274852	ZINC31274852	-7.2	-7.1	-6.9	-7.06667	0.152753
fda_ligand_0350.pdbqt	ZINC000040430143	olaparib	-8	-8.2	-7.8	-8	0.2
fda_ligand_0351.pdbqt	ZINC000100013130	midostaurin	-7.1	-7.3	-7.5	-7.3	0.2
fda_ligand_0352.pdbqt	ZINC000026664090	sqv	-7.4	-7.5	-7.5	-7.46667	0.057735
fda_ligand_0353.pdbqt	ZINC000026664090	sqv	-6.1	-6.2	-7	-6.43333	0.493288
fda_ligand_0354.pdbqt	ZINC000026664090	sqv	-6	-6	-6	-6	0
fda_ligand_0355.pdbqt	ZINC000002000707	lodoxamide	-7.2	-7.3	-7.9	-7.46667	0.378594
fda_ligand_0356.pdbqt	ZINC000026985532	sqv	-8	-7.5	-7.5	-7.66667	0.288675
fda_ligand_0357.pdbqt	ZINC000026985532	sqv	-6.6	-6	-8	-6.86667	1.02632
fda_ligand_0358.pdbqt	ZINC000026985532	sqv	-6.8	-7.2	-7.8	-7.26667	0.503322
fda_ligand_0359.pdbqt	ZINC000003874498	anandron	-7	-6.6	-6.4	-6.66667	0.305505
fda_ligand_0360.pdbqt	ZINC000001530639	fluvastatin	-6.1	-5.8	-5.9	-5.93333	0.152753
fda_ligand_0361.pdbqt	ZINC000242437514	ZINC242437514	-5.8	-6	-5.9	-5.9	0.1
fda_ligand_0362.pdbqt	ZINC000003830391	cefadroxil	-7.1	-7.2	-7.9	-7.4	0.43589
fda_ligand_0363.pdbqt	ZINC000003830391	cefadroxil	-7.1	-7.2	-7.9	-7.4	0.43589
fda_ligand_0364.pdbqt	ZINC000003873921	picosulfuric acid	-7.3	-6.3	-7.4	-7	0.608276
fda_ligand_0365.pdbqt	ZINC000004217732	lubiprostone	-6.1	-6.3	-6.5	-6.3	0.2
fda_ligand_0366.pdbqt	ZINC000006745272	stivarga	-8.2	-8.2	-7.9	-8.1	0.173205
fda_ligand_0367.pdbqt	ZINC000253476025	ZINC253476025	-5.9	-5.6	-6.6	-6.03333	0.51316
fda_ligand_0368.pdbqt	ZINC000018203737	edaravone	-5.3	-5.5	-6.9	-5.9	0.87178
fda_ligand_0369.pdbqt	ZINC000018203737	edaravone	-5.4	-5.5	-6.4	-5.76667	0.550757
fda_ligand_0370.pdbqt	ZINC000000020220	ciprofloxacin	-6.9	-6.9	-6.6	-6.8	0.173205
fda_ligand_0371.pdbqt	ZINC000000020220	ciprofloxacin	-6.9	-6.9	-7	-6.93333	0.057735
fda_ligand_0372.pdbqt	ZINC000000057435	oxymetazoline	-5.7	-5.7	-6.2	-5.86667	0.288675
fda_ligand_0373.pdbqt	ZINC000000057534	xylometazoline	-5.5	-5.7	-6.2	-5.8	0.360555
fda_ligand_0374.pdbqt	ZINC000000968273	trihexyphenidyl	-5.8	-5.9	-6.2	-5.96667	0.208167
fda_ligand_0375.pdbqt	ZINC000003831490	azulfidine	-6.8	-7.5	-7.3	-7.2	0.360555
fda_ligand_0376.pdbqt	ZINC000003831490	azulfidine	-7.2	-7.3	-7.1	-7.2	0.1
fda_ligand_0377.pdbqt	ZINC000118912450	oxymetholone	-7	-6.9	-7.3	-7.06667	0.208167
fda_ligand_0378.pdbqt	ZINC000003806413	r340	-6.9	-7	-6.6	-6.83333	0.208167
fda_ligand_0379.pdbqt	ZINC000003806413	r340	-6.1	-6.4	-6.3	-6.26667	0.152753
fda_ligand_0380.pdbqt	ZINC000000010164	cevimeline	-5.1	-5.2	-5.4	-5.23333	0.152753
fda_ligand_0381.pdbqt	ZINC000000010164	cevimeline	-5	-5.2	-5.4	-5.2	0.2
fda_ligand_0382.pdbqt	ZINC000012484958	retin-a	-6.2	-6.1	-6.2	-6.16667	0.057735
fda_ligand_0383.pdbqt	ZINC000019632706	sular	-6.4	-6.2	-6.6	-6.4	0.2
fda_ligand_0384.pdbqt	ZINC000000591993	sular	-6.8	-6.8	-7.4	-7	0.34641
fda_ligand_0385.pdbqt	ZINC000003920719	atorvastatin	-7.3	-7.4	-6.4	-7.03333	0.550757
fda_ligand_0386.pdbqt	ZINC000004083606	hydroxyprogesterone	-6.3	-6.3	-7	-6.53333	0.404145
fda_ligand_0387.pdbqt	ZINC000005224188	dmso	-2.6	-2.6	-2.9	-2.7	0.173205
fda_ligand_0388.pdbqt	ZINC000013545636	pentobarbital	-6.7	-6.9	-6.7	-6.76667	0.11547
fda_ligand_0389.pdbqt	ZINC000013545636	pentobarbital	-6.7	-6.9	-6.7	-6.76667	0.11547
fda_ligand_0390.pdbqt	ZINC000019796168	sildenafil	-6.9	-7.4	-7	-7.1	0.264575
fda_ligand_0391.pdbqt	ZINC000019796168	sildenafil	-7.3	-7.4	-7	-7.23333	0.208167
fda_ligand_0392.pdbqt	ZINC000019796168	sildenafil	-7.2	-7.5	-7.4	-7.36667	0.152753
fda_ligand_0393.pdbqt	ZINC000003782599	proscar	-6.8	-6.8	-6.9	-6.83333	0.057735
fda_ligand_0394.pdbqt	ZINC000000075126	zofran	-6.9	-7	-6.9	-6.93333	0.057735
fda_ligand_0395.pdbqt	ZINC000000075126	zofran	-6.9	-6.8	-6.8	-6.83333	0.057735
fda_ligand_0396.pdbqt	ZINC000003931840	altabax	-6.3	-6.3	-6.1	-6.23333	0.11547
fda_ligand_0397.pdbqt	ZINC000003931840	altabax	-6.6	-6.3	-6.4	-6.43333	0.152753
fda_ligand_0398.pdbqt	ZINC000009302201	retin-a	-6	-6.1	-6.2	-6.1	0.1
fda_ligand_0399.pdbqt	ZINC000013818943	lexiscan	-8	-8.2	-7.6	-7.93333	0.305505
fda_ligand_0400.pdbqt	ZINC000022448983	bosulif	-6.1	-6.6	-6.5	-6.4	0.264575
fda_ligand_0401.pdbqt	ZINC000022448983	bosulif	-5.8	-6.2	-6.6	-6.2	0.4
fda_ligand_0402.pdbqt	ZINC000022448983	bosulif	-5.7	-6.5	-6	-6.06667	0.404145
fda_ligand_0403.pdbqt	ZINC000000968328	rosiglitazone	-6.3	-6.2	-6.1	-6.2	0.1
fda_ligand_0404.pdbqt	ZINC000000968328	rosiglitazone	-5.9	-6.3	-7.5	-6.56667	0.832666
fda_ligand_0405.pdbqt	ZINC000001530886	ZINC1530886	-7.4	-7.6	-7.4	-7.46667	0.11547
fda_ligand_0406.pdbqt	ZINC000001530886	ZINC1530886	-7.1	-7.4	-7.3	-7.26667	0.152753
fda_ligand_0407.pdbqt	ZINC000002020233	efv	-7.5	-7.7	-7.7	-7.63333	0.11547
fda_ligand_0408.pdbqt	ZINC000003794711	zavesca	-6.3	-6.5	-6.8	-6.53333	0.251661
fda_ligand_0409.pdbqt	ZINC000003794711	zavesca	-6.3	-6.5	-6.7	-6.5	0.2
fda_ligand_0410.pdbqt	ZINC000003794711	zavesca	-6.3	-6.5	-6.7	-6.5	0.2
fda_ligand_0411.pdbqt	ZINC000003806262	ZINC3806262	-6.7	-6.8	-8	-7.16667	0.723418
fda_ligand_0412.pdbqt	ZINC000003806262	ZINC3806262	-6.7	-6.8	-8	-7.16667	0.723418
fda_ligand_0413.pdbqt	ZINC000001280665	hydrocodone	-6.6	-6.4	-7	-6.66667	0.305505
fda_ligand_0414.pdbqt	ZINC000001280665	hydrocodone	-6.8	-6.8	-7.2	-6.93333	0.23094
fda_ligand_0415.pdbqt	ZINC000001280665	hydrocodone	-6.6	-6.3	-7.1	-6.66667	0.404145
fda_ligand_0416.pdbqt	ZINC000003977978	fluocinonide	-7.8	-8	-7.8	-7.86667	0.11547
fda_ligand_0417.pdbqt	ZINC000003875357	prednisone	-7.6	-7.4	-7.1	-7.36667	0.251661
fda_ligand_0418.pdbqt	ZINC000013648755	saxagliptin	-6.6	-6.3	-6.4	-6.43333	0.152753
fda_ligand_0419.pdbqt	ZINC000013648755	saxagliptin	-6.6	-6.3	-6.7	-6.53333	0.208167
fda_ligand_0420.pdbqt	ZINC000000113446	tindamax	-6.1	-6.3	-7.2	-6.53333	0.585947
fda_ligand_0421.pdbqt	ZINC000003941496	atazanavir	-7.1	-7.5	-6.3	-6.96667	0.61101
fda_ligand_0422.pdbqt	ZINC000004215736	dihydrocodeine	-6.3	-6.4	-6.9	-6.53333	0.321455
fda_ligand_0423.pdbqt	ZINC000004215736	dihydrocodeine	-6.3	-6.4	-6.9	-6.53333	0.321455
fda_ligand_0424.pdbqt	ZINC000008101109	foscarnet	-4.7	-4.8	-4.5	-4.66667	0.152753
fda_ligand_0425.pdbqt	ZINC000008101109	foscarnet	-5.5	-5	-5.2	-5.23333	0.251661
fda_ligand_0426.pdbqt	ZINC000008101109	foscarnet	-4.8	-5.6	-5.2	-5.2	0.4
fda_ligand_0427.pdbqt	ZINC000012358719	opahl	-5.8	-5.8	-5.8	-5.8	0
fda_ligand_0428.pdbqt	ZINC000018516586	delavirdine	-6.8	-6.9	-6.8	-6.83333	0.057735
fda_ligand_0429.pdbqt	ZINC000018516586	delavirdine	-6.9	-6.9	-7.4	-7.06667	0.288675
fda_ligand_0430.pdbqt	ZINC000003812862	pamidronate	-5.9	-5.8	-5.5	-5.73333	0.208167
fda_ligand_0431.pdbqt	ZINC000003812862	pamidronate	-5.4	-5.5	-5.6	-5.5	0.1
fda_ligand_0432.pdbqt	ZINC000003812862	pamidronate	-5.7	-5.5	-5.6	-5.6	0.1
fda_ligand_0433.pdbqt	ZINC000000005152	pregabalin	-5.3	-5.2	-5.4	-5.3	0.1
fda_ligand_0434.pdbqt	ZINC000000006300	sonata	-6.4	-6.4	-6.9	-6.56667	0.288675
fda_ligand_0435.pdbqt	ZINC000001485935	isavuconazole	-6	-6.3	-7.1	-6.46667	0.568624
fda_ligand_0436.pdbqt	ZINC000000113428	tetrahydrozoline	-6.5	-6.7	-7.7	-6.96667	0.64291
fda_ligand_0437.pdbqt	ZINC000000119717	naphazoline	-5.6	-6.4	-6.7	-6.23333	0.568624
fda_ligand_0438.pdbqt	ZINC000000537822	haloperidol	-5.8	-6.8	-6.1	-6.23333	0.51316
fda_ligand_0439.pdbqt	ZINC000000537822	haloperidol	-5.8	-5.8	-6.1	-5.9	0.173205
fda_ligand_0440.pdbqt	ZINC000003798763	pravastatin	-5.9	-5.6	-6.5	-6	0.458258
fda_ligand_0441.pdbqt	ZINC000001530611	desipramine	-6.1	-6.5	-6.8	-6.46667	0.351188
fda_ligand_0442.pdbqt	ZINC000003882036	kenalog	-7.6	-7.4	-7.6	-7.53333	0.11547
fda_ligand_0443.pdbqt	ZINC000000005423	febuxostat	-5.6	-5.7	-6.3	-5.86667	0.378594
fda_ligand_0444.pdbqt	ZINC000066166864	alectinib	-6.5	-6.6	-6.2	-6.43333	0.208167
fda_ligand_0445.pdbqt	ZINC000066166864	alectinib	-6.5	-6.6	-6.2	-6.43333	0.208167
fda_ligand_0446.pdbqt	ZINC000000897408	casodex	-6.5	-6.6	-7	-6.7	0.264575
fda_ligand_0447.pdbqt	ZINC000000001792	neostigmine	-5.1	-5.3	-6.1	-5.5	0.52915
fda_ligand_0448.pdbqt	ZINC000000000196	cyclopentolate	-5.6	-5.7	-6.3	-5.86667	0.378594
fda_ligand_0449.pdbqt	ZINC000000000196	cyclopentolate	-5.5	-5.7	-6.5	-5.9	0.52915
fda_ligand_0450.pdbqt	ZINC000000004166	sotalol	-5.8	-5.8	-7	-6.2	0.69282
fda_ligand_0451.pdbqt	ZINC000000014257	celontin	-5.8	-6	-6.5	-6.1	0.360555
fda_ligand_0452.pdbqt	ZINC000000014864	vcz	-7	-6.8	-7	-6.93333	0.11547
fda_ligand_0453.pdbqt	ZINC000000016154	potiga	-6.6	-6.7	-7.2	-6.83333	0.321455
fda_ligand_0454.pdbqt	ZINC000000089763	gantanol	-7	-7	-7.2	-7.06667	0.11547
fda_ligand_0455.pdbqt	ZINC000000089763	gantanol	-6.8	-6.6	-7.1	-6.83333	0.251661
fda_ligand_0456.pdbqt	ZINC000001482094	propylhexedrine	-5.1	-5.1	-5.5	-5.23333	0.23094
fda_ligand_0457.pdbqt	ZINC000001482197	tranylcypromine	-4.7	-4.8	-5.1	-4.86667	0.208167
fda_ligand_0458.pdbqt	ZINC000001489478	sitagliptin	-6.8	-6.7	-7.4	-6.96667	0.378594
fda_ligand_0459.pdbqt	ZINC000001489478	sitagliptin	-7.2	-7.5	-7.1	-7.26667	0.208167
fda_ligand_0460.pdbqt	ZINC000001530652	hydroxychloroquine	-5.8	-5.6	-5.7	-5.7	0.1
fda_ligand_0461.pdbqt	ZINC000001530652	hydroxychloroquine	-5.6	-5.6	-5.8	-5.66667	0.11547
fda_ligand_0462.pdbqt	ZINC000001530652	hydroxychloroquine	-5.6	-5.8	-6.5	-5.96667	0.472582
fda_ligand_0463.pdbqt	ZINC000001530652	hydroxychloroquine	-5.6	-5.6	-5.9	-5.7	0.173205
fda_ligand_0464.pdbqt	ZINC000001530820	suxamethonium	-4.9	-4.9	-5.1	-4.96667	0.11547
fda_ligand_0465.pdbqt	ZINC000001530694	tamsulosin	-5.2	-5.1	-6.2	-5.5	0.608276
fda_ligand_0466.pdbqt	ZINC000000006156	modafinil	-6.3	-6.6	-7.4	-6.76667	0.568624
fda_ligand_0467.pdbqt	ZINC000000006310	aczone	-5.8	-6	-6.5	-6.1	0.360555
fda_ligand_0468.pdbqt	ZINC000000006481	rilutek	-6.8	-6.8	-7.5	-7.03333	0.404145
fda_ligand_0469.pdbqt	ZINC000011679756	eltrombopag	-8.3	-8.4	-8	-8.23333	0.208167
fda_ligand_0470.pdbqt	ZINC000011679756	eltrombopag	-8.5	-8.6	-8.3	-8.46667	0.152753
fda_ligand_0471.pdbqt	ZINC000011680943	lisdexamfetamine	-5.7	-5.7	-5.8	-5.73333	0.057735
fda_ligand_0472.pdbqt	ZINC000011680943	lisdexamfetamine	-6	-5.7	-5.9	-5.86667	0.152753
fda_ligand_0473.pdbqt	ZINC000011681563	netupitant	-7.5	-7.7	-7.6	-7.6	0.1
fda_ligand_0474.pdbqt	ZINC000011681563	netupitant	-7.5	-7.7	-7.6	-7.6	0.1
fda_ligand_0475.pdbqt	ZINC000000000973	avobenzone	-6.2	-6.1	-6.3	-6.2	0.1
fda_ligand_0476.pdbqt	ZINC000000000973	avobenzone	-6.1	-6.1	-6.2	-6.13333	0.057735
fda_ligand_0477.pdbqt	ZINC000000002272	ketoprofen	-6.5	-6.5	-7.3	-6.76667	0.46188
fda_ligand_0478.pdbqt	ZINC000000002279	ketorolac	-6.1	-6.3	-7.7	-6.7	0.87178
fda_ligand_0479.pdbqt	ZINC000011615926	lipitor	-6.8	-7	-7	-6.93333	0.11547
fda_ligand_0480.pdbqt	ZINC000011677857	stendra	-7.1	-6.8	-7.3	-7.06667	0.251661
fda_ligand_0481.pdbqt	ZINC000011615927	lipitor	-7.3	-7.4	-6.2	-6.96667	0.665833
fda_ligand_0482.pdbqt	ZINC000011615928	lipitor	-6.9	-7.4	-6.3	-6.86667	0.550757
fda_ligand_0483.pdbqt	ZINC000011617039	pazopanib	-7.2	-7.3	-7.4	-7.3	0.1
fda_ligand_0484.pdbqt	ZINC000011677837	eliquis	-7.3	-7.4	-6.8	-7.16667	0.321455
fda_ligand_0485.pdbqt	ZINC000034806477	xtandi	-6.7	-6.5	-6.2	-6.46667	0.251661
fda_ligand_0486.pdbqt	ZINC000022010649	panobinostat	-7.5	-7.6	-7.1	-7.4	0.264575
fda_ligand_0487.pdbqt	ZINC000000001317	disofenin	-6.2	-6.2	-5.9	-6.1	0.173205
fda_ligand_0488.pdbqt	ZINC000000896663	tranylcypromine	-5	-5	-5.4	-5.13333	0.23094
fda_ligand_0489.pdbqt	ZINC000001547851	etiracetam	-5.5	-5.6	-5.7	-5.6	0.1
fda_ligand_0490.pdbqt	ZINC000001999441	ZINC1999441	-6.1	-6	-7.7	-6.6	0.953939
fda_ligand_0491.pdbqt	ZINC000001999441	ZINC1999441	-7	-6.7	-7.7	-7.13333	0.51316
fda_ligand_0492.pdbqt	ZINC000003818808	tofacitinib	-6.7	-6.9	-6.7	-6.76667	0.11547
fda_ligand_0493.pdbqt	ZINC000003818808	tofacitinib	-7.5	-7.3	-7.4	-7.4	0.1
fda_ligand_0494.pdbqt	ZINC000003873295	oxiconazole	-5.9	-5.9	-7	-6.26667	0.635085
fda_ligand_0495.pdbqt	ZINC000003873295	oxiconazole	-5.7	-6.4	-6.7	-6.26667	0.51316
fda_ligand_0496.pdbqt	ZINC000004392649	tasimelteon	-5.8	-5.9	-6	-5.9	0.1
fda_ligand_0497.pdbqt	ZINC000008035268	thonzonium	-4.9	-5	-4.4	-4.76667	0.321455
fda_ligand_0498.pdbqt	ZINC000253476027	ZINC253476027	-6.1	-5.8	-6.1	-6	0.173205
fda_ligand_0499.pdbqt	ZINC000013973998	gabapentin	-6	-6.2	-6.8	-6.33333	0.416333
fda_ligand_0500.pdbqt	ZINC000100018854	ZINC100018854	-6.8	-6.8	-6.7	-6.76667	0.057735
fda_ligand_0501.pdbqt	ZINC000100018854	ZINC100018854	-6.6	-6.7	-6.7	-6.66667	0.057735
fda_ligand_0502.pdbqt	ZINC000100018854	ZINC100018854	-6.8	-6.8	-6.7	-6.76667	0.057735
fda_ligand_0503.pdbqt	ZINC000009302239	avibactam	-7.5	-7.5	-7.9	-7.63333	0.23094
fda_ligand_0504.pdbqt	ZINC000095551509	grazoprevir	-7.8	-7.8	-7.5	-7.7	0.173205
fda_ligand_0505.pdbqt	ZINC000000000373	hydroxyamphetamine	-5	-5	-5.6	-5.2	0.34641
fda_ligand_0506.pdbqt	ZINC000000155905	tiopronin	-5.4	-5.4	-5.4	-5.4	0
fda_ligand_0507.pdbqt	ZINC000000968375	ZINC968375	-6.1	-6.1	-6.3	-6.16667	0.11547
fda_ligand_0508.pdbqt	ZINC000242437512	ZINC242437512	-5.4	-5.4	-5.9	-5.56667	0.288675
fda_ligand_0509.pdbqt	ZINC000003929022	tenofovir disoproxil	-5.9	-6.5	-7.5	-6.63333	0.80829
fda_ligand_0510.pdbqt	ZINC000004474443	cefprozil	-7.6	-7.7	-7.7	-7.66667	0.057735
fda_ligand_0511.pdbqt	ZINC000004474443	cefprozil	-7.4	-7.7	-7.7	-7.6	0.173205
fda_ligand_0512.pdbqt	ZINC000008214703	unoprostone	-5.6	-5.7	-6.2	-5.83333	0.321455
fda_ligand_0513.pdbqt	ZINC000012503156	ZINC12503156	-5.5	-5.5	-5.5	-5.5	0
fda_ligand_0514.pdbqt	ZINC000030691797	perampanel	-6.9	-6.9	-6.6	-6.8	0.173205
fda_ligand_0515.pdbqt	ZINC000043206370	niraparib	-7.5	-7.5	-7.2	-7.4	0.173205
fda_ligand_0516.pdbqt	ZINC000100016084	trospium	-6.4	-6.3	-7.4	-6.7	0.608276
fda_ligand_0517.pdbqt	ZINC000000403618	sabril	-5	-4.9	-4.8	-4.9	0.1
fda_ligand_0518.pdbqt	ZINC000001542199	avage	-6.4	-6.7	-6.2	-6.43333	0.251661
fda_ligand_0519.pdbqt	ZINC000003604264	imid3	-7.1	-7.2	-7.1	-7.13333	0.057735
fda_ligand_0520.pdbqt	ZINC000036701290	ponatinib	-7.4	-7.5	-7.7	-7.53333	0.152753
fda_ligand_0521.pdbqt	ZINC000036701290	ponatinib	-7.5	-7.5	-7.7	-7.56667	0.11547
fda_ligand_0522.pdbqt	ZINC000000004949	gabapentin	-5.5	-5.7	-5.8	-5.66667	0.152753
fda_ligand_0523.pdbqt	ZINC000000004413	rivastigmine	-5.2	-5.2	-5.6	-5.33333	0.23094
fda_ligand_0524.pdbqt	ZINC000000004413	rivastigmine	-5.3	-5.2	-6	-5.5	0.43589
fda_ligand_0525.pdbqt	ZINC000000010163	evoxac	-5.2	-5.2	-6	-5.46667	0.46188
fda_ligand_0526.pdbqt	ZINC000000010163	evoxac	-5.1	-5.2	-6	-5.43333	0.493288
fda_ligand_0527.pdbqt	ZINC000100296828	ZINC100296828	-6.6	-6.4	-7.1	-6.7	0.360555
fda_ligand_0528.pdbqt	ZINC000100296828	ZINC100296828	-6.3	-6.3	-7.3	-6.63333	0.57735
fda_ligand_0529.pdbqt	ZINC000100296832	ZINC100296832	-6.6	-6.6	-6.3	-6.5	0.173205
fda_ligand_0530.pdbqt	ZINC000100296832	ZINC100296832	-6.5	-6.3	-6.1	-6.3	0.2
fda_ligand_0531.pdbqt	ZINC000100378061	naldemedine	-7.5	-7.5	-8.3	-7.76667	0.46188
fda_ligand_0532.pdbqt	ZINC000100378061	naldemedine	-8	-8.4	-7.9	-8.1	0.264575
fda_ligand_0533.pdbqt	ZINC000100378061	naldemedine	-7.7	-7.6	-8.3	-7.86667	0.378594
fda_ligand_0534.pdbqt	ZINC000084668739	lifitegrast	-7.2	-7.3	-7.1	-7.2	0.1
fda_ligand_0535.pdbqt	ZINC000000395010	ZINC395010	-5.7	-6	-5.8	-5.83333	0.152753
fda_ligand_0536.pdbqt	ZINC000100070937	ZINC100070937	-4.8	-4.8	-4.8	-4.8	0
fda_ligand_0537.pdbqt	ZINC000070466416	cabozantinib	-7.5	-7.5	-7.2	-7.4	0.173205
fda_ligand_0538.pdbqt	ZINC000070466416	cabozantinib	-7.8	-7.4	-7.6	-7.6	0.2
fda_ligand_0539.pdbqt	ZINC000116473771	ZINC116473771	-7.5	-8	-8.1	-7.86667	0.321455
fda_ligand_0540.pdbqt	ZINC000116473771	ZINC116473771	-6.8	-6.9	-6.8	-6.83333	0.057735
fda_ligand_0541.pdbqt	ZINC000084757007	lesinurad	-7.6	-7.3	-7	-7.3	0.3
fda_ligand_0542.pdbqt	ZINC000013986658	idelalisib	-7.5	-7.4	-7.4	-7.43333	0.057735
fda_ligand_0543.pdbqt	ZINC000013986658	idelalisib	-7.2	-6.7	-7.4	-7.1	0.360555
fda_ligand_0544.pdbqt	ZINC000001530728	rnd	-5.4	-5.7	-5.6	-5.56667	0.152753
fda_ligand_0545.pdbqt	ZINC000001530728	rnd	-5.5	-5.9	-6.1	-5.83333	0.305505
fda_ligand_0546.pdbqt	ZINC000003876023	ZINC3876023	-6.7	-6.8	-6.8	-6.76667	0.057735
fda_ligand_0547.pdbqt	ZINC000003872931	avapro	-6.9	-7.4	-7.2	-7.16667	0.251661
fda_ligand_0548.pdbqt	ZINC000003872931	avapro	-6.9	-7.4	-7.2	-7.16667	0.251661
fda_ligand_0549.pdbqt	ZINC000003875483	opana	-6.8	-7.2	-7.4	-7.13333	0.305505
fda_ligand_0550.pdbqt	ZINC000003875483	opana	-7.7	-7.8	-8.4	-7.96667	0.378594
fda_ligand_0551.pdbqt	ZINC000003875483	opana	-7.2	-7.2	-7.9	-7.43333	0.404145
fda_ligand_0552.pdbqt	ZINC000003914596	saquinavir	-7	-7.5	-7.6	-7.36667	0.321455
fda_ligand_0553.pdbqt	ZINC000003914596	saquinavir	-7.5	-7.6	-6.5	-7.2	0.608276
fda_ligand_0554.pdbqt	ZINC000003914596	saquinavir	-7.7	-6.7	-6.6	-7	0.608276
fda_ligand_0555.pdbqt	ZINC000003922770	doripenem	-8.3	-7.3	-7.8	-7.8	0.5
fda_ligand_0556.pdbqt	ZINC000003787097	besifloxacin	-6.8	-6.9	-6.6	-6.76667	0.152753
fda_ligand_0557.pdbqt	ZINC000003819392	riociguat	-7.3	-7.2	-6.9	-7.13333	0.208167
fda_ligand_0558.pdbqt	ZINC000003792417	sacubitril	-7.5	-7.1	-7	-7.2	0.264575
fda_ligand_0559.pdbqt	ZINC000003823475	eletriptan	-6.2	-6	-6.9	-6.36667	0.472582
fda_ligand_0560.pdbqt	ZINC000003823475	eletriptan	-6	-6	-6.8	-6.26667	0.46188
fda_ligand_0561.pdbqt	ZINC000003823475	eletriptan	-5.9	-6	-6.6	-6.16667	0.378594
fda_ligand_0562.pdbqt	ZINC000003830842	flecainide	-6.5	-6.7	-6.6	-6.6	0.1
fda_ligand_0563.pdbqt	ZINC000003875392	tbz	-6.3	-5.9	-6.2	-6.13333	0.208167
fda_ligand_0564.pdbqt	ZINC000003875392	tbz	-6.6	-6.5	-6	-6.36667	0.321455
fda_ligand_0565.pdbqt	ZINC000003875392	tbz	-6.6	-6.5	-6.2	-6.43333	0.208167
fda_ligand_0566.pdbqt	ZINC000003876136	luxiq	-7	-7.1	-7.8	-7.3	0.43589
fda_ligand_0567.pdbqt	ZINC000012503151	neptazane	-7.3	-7.6	-7.3	-7.4	0.173205
fda_ligand_0568.pdbqt	ZINC000012503187	conivaptan	-8.6	-8.1	-7.5	-8.06667	0.550757
fda_ligand_0569.pdbqt	ZINC000012503187	conivaptan	-8.4	-7.7	-7.6	-7.9	0.43589
fda_ligand_0570.pdbqt	ZINC000000002216	hand	-5.8	-5.8	-6.5	-6.03333	0.404145
fda_ligand_0571.pdbqt	ZINC000000002216	hand	-5.8	-6	-6.6	-6.13333	0.416333
fda_ligand_0572.pdbqt	ZINC000003941829	fosamprenavir	-6.4	-6.3	-6.9	-6.53333	0.321455
fda_ligand_0573.pdbqt	ZINC000003941829	fosamprenavir	-6.5	-6.2	-6.9	-6.53333	0.351188
fda_ligand_0574.pdbqt	ZINC000003941829	fosamprenavir	-6.4	-6	-7.1	-6.5	0.556776
fda_ligand_0575.pdbqt	ZINC000012503068	trosec	-6.4	-6.3	-7.4	-6.7	0.608276
fda_ligand_0576.pdbqt	ZINC000012503076	eurax	-5.2	-5.3	-6	-5.5	0.43589
fda_ligand_0577.pdbqt	ZINC000012503099	triprolidine	-5.7	-5.6	-7.3	-6.2	0.953939
fda_ligand_0578.pdbqt	ZINC000012503099	triprolidine	-5.8	-5.6	-7.3	-6.23333	0.929157
fda_ligand_0579.pdbqt	ZINC000000538386	sufentanil	-6.3	-6.1	-6.4	-6.26667	0.152753
fda_ligand_0580.pdbqt	ZINC000000538386	sufentanil	-5.9	-5.9	-6.4	-6.06667	0.288675
fda_ligand_0581.pdbqt	ZINC000000537805	diabeta	-7.1	-7.1	-7.3	-7.16667	0.11547
fda_ligand_0582.pdbqt	ZINC000000537805	diabeta	-7	-7.1	-7.6	-7.23333	0.321455
fda_ligand_0583.pdbqt	ZINC000000537805	diabeta	-6.9	-7.3	-7.1	-7.1	0.2
fda_ligand_0584.pdbqt	ZINC000000537805	diabeta	-6.9	-6.9	-6.8	-6.86667	0.057735
fda_ligand_0585.pdbqt	ZINC000000113415	altol	-6.3	-6.2	-6.6	-6.36667	0.208167
fda_ligand_0586.pdbqt	ZINC000001611274	topotecan	-6.7	-6.9	-6.7	-6.76667	0.11547
fda_ligand_0587.pdbqt	ZINC000001611274	topotecan	-6.8	-7.1	-6.9	-6.93333	0.152753
fda_ligand_0588.pdbqt	ZINC000000001958	esbriet	-5.5	-5.7	-6.4	-5.86667	0.472582
fda_ligand_0589.pdbqt	ZINC000000020783	tapentadol	-5.8	-5.9	-6.1	-5.93333	0.152753
fda_ligand_0590.pdbqt	ZINC000000114124	depen	-4.3	-4.3	-4.5	-4.36667	0.11547
fda_ligand_0591.pdbqt	ZINC000000114127	depen	-4.6	-4.4	-4.5	-4.5	0.1
fda_ligand_0592.pdbqt	ZINC000011726211	lastacaft	-6.5	-6.4	-6.4	-6.43333	0.057735
fda_ligand_0593.pdbqt	ZINC000011726211	lastacaft	-6.5	-6.5	-6.1	-6.36667	0.23094
fda_ligand_0594.pdbqt	ZINC000013298313	allopurinol	-5.8	-5.9	-5.9	-5.86667	0.057735
fda_ligand_0595.pdbqt	ZINC000013298313	allopurinol	-5.9	-5.9	-5.9	-5.9	0
fda_ligand_0596.pdbqt	ZINC000003830500	cephalexin	-7.2	-7.3	-7.4	-7.3	0.1
fda_ligand_0597.pdbqt	ZINC000003830500	cephalexin	-7.2	-7.3	-7.4	-7.3	0.1
fda_ligand_0598.pdbqt	ZINC000003871701	pfizerpen	-6.9	-7	-7.1	-7	0.1
fda_ligand_0599.pdbqt	ZINC000001187543	metazolo	-4.2	-4.2	-4.1	-4.16667	0.057735
fda_ligand_0600.pdbqt	ZINC000000621853	colcrys	-6.7	-6.6	-6.8	-6.7	0.1
fda_ligand_0601.pdbqt	ZINC000040899447	erivedge	-6.5	-6.7	-6.9	-6.7	0.2
fda_ligand_0602.pdbqt	ZINC000001534965	pitavastatin	-6.2	-6.1	-6.1	-6.13333	0.057735
fda_ligand_0603.pdbqt	ZINC000003792789	isotretinoin	-5.8	-5.8	-5.5	-5.7	0.173205
fda_ligand_0604.pdbqt	ZINC000003813078	epoprostenol	-6.6	-6.3	-6.4	-6.43333	0.152753
fda_ligand_0605.pdbqt	ZINC000003830999	liothyronine	-5.7	-5.4	-5.9	-5.66667	0.251661
fda_ligand_0606.pdbqt	ZINC000003830999	liothyronine	-5.6	-5.4	-5.4	-5.46667	0.11547
fda_ligand_0607.pdbqt	ZINC000003914808	chenodal	-6.8	-7.2	-7.2	-7.06667	0.23094
fda_ligand_0608.pdbqt	ZINC000003927822	lurasidone	-7.8	-8.1	-7.8	-7.9	0.173205
fda_ligand_0609.pdbqt	ZINC000003927822	lurasidone	-7.8	-8.1	-7.7	-7.86667	0.208167
fda_ligand_0610.pdbqt	ZINC000000901736	oxyproline	-5.5	-5.5	-5.3	-5.43333	0.11547
fda_ligand_0611.pdbqt	ZINC000000105196	phe	-5.6	-5.6	-5.7	-5.63333	0.057735
fda_ligand_0612.pdbqt	ZINC000000968233	benzophenone	-5.5	-5.5	-5.7	-5.56667	0.11547
fda_ligand_0613.pdbqt	ZINC000000895099	valine	-4.3	-4.4	-4.5	-4.4	0.1
fda_ligand_0614.pdbqt	ZINC000000895103	threonin	-4.4	-4.4	-4.8	-4.53333	0.23094
fda_ligand_0615.pdbqt	ZINC000000895457	oxyproline	-5.5	-5.5	-5.6	-5.53333	0.057735
fda_ligand_0616.pdbqt	ZINC000001482164	ice	-5.1	-5.1	-5.2	-5.13333	0.057735
fda_ligand_0617.pdbqt	ZINC000001532525	arginine	-6.8	-6.6	-6.6	-6.66667	0.11547
fda_ligand_0618.pdbqt	ZINC000001532529	methionine	-4.6	-4.6	-4.7	-4.63333	0.057735
fda_ligand_0619.pdbqt	ZINC000000901159	lavaco	-3.5	-3.7	-3.7	-3.63333	0.11547
fda_ligand_0620.pdbqt	ZINC000012661824	airol	-6	-5.5	-6.1	-5.86667	0.321455
fda_ligand_0621.pdbqt	ZINC000001532526	glumin	-5.7	-5.7	-5.6	-5.66667	0.057735
fda_ligand_0622.pdbqt	ZINC000003831040	com	-3.9	-4.3	-4.3	-4.16667	0.23094
fda_ligand_0623.pdbqt	ZINC000004658562	dla	-4.8	-4.9	-4.7	-4.8	0.1
fda_ligand_0624.pdbqt	ZINC000004658552	padil	-4.1	-4.1	-3.7	-3.96667	0.23094
fda_ligand_0625.pdbqt	ZINC000003589203	acetadote	-5.3	-5.2	-5.1	-5.2	0.1
fda_ligand_0626.pdbqt	ZINC000003795098	arac	-6.7	-6.7	-7.9	-7.1	0.69282
fda_ligand_0627.pdbqt	ZINC000003831050	methacholine	-4.6	-4.6	-5	-4.73333	0.23094
fda_ligand_0628.pdbqt	ZINC000003831051	methacholine	-4.9	-4.7	-4.8	-4.8	0.1
fda_ligand_0629.pdbqt	ZINC000003830959	iopromide	-5.4	-5.3	-5.9	-5.53333	0.321455
fda_ligand_0630.pdbqt	ZINC000000002212	halcion	-6.7	-6.7	-7.1	-6.83333	0.23094
fda_ligand_0631.pdbqt	ZINC000000057624	adrenor	-6	-6.1	-6.3	-6.13333	0.152753
fda_ligand_0632.pdbqt	ZINC000022002214	molindone	-6.3	-6.3	-6.3	-6.3	0
fda_ligand_0633.pdbqt	ZINC000022002214	molindone	-6	-6.1	-6.6	-6.23333	0.321455
fda_ligand_0634.pdbqt	ZINC000022002218	molindone	-6.3	-6.5	-6.3	-6.36667	0.11547
fda_ligand_0635.pdbqt	ZINC000022002218	molindone	-6.2	-6.5	-6.3	-6.33333	0.152753
fda_ligand_0636.pdbqt	ZINC000000034157	nordefrin	-5.5	-5.7	-6.4	-5.86667	0.472582
fda_ligand_0637.pdbqt	ZINC000022010379	phendimetrazine	-5.1	-5.2	-5.7	-5.33333	0.321455
fda_ligand_0638.pdbqt	ZINC000022010379	phendimetrazine	-5	-5.2	-6.3	-5.5	0.7
fda_ligand_0639.pdbqt	ZINC000022010379	phendimetrazine	-5.4	-5.3	-5.7	-5.46667	0.208167
fda_ligand_0640.pdbqt	ZINC000022010382	phendimetrazine	-5.4	-5.5	-5.6	-5.5	0.1
fda_ligand_0641.pdbqt	ZINC000022010382	phendimetrazine	-5.4	-5.5	-5.8	-5.56667	0.208167
fda_ligand_0642.pdbqt	ZINC000022010382	phendimetrazine	-5.5	-5.4	-5.9	-5.6	0.264575
fda_ligand_0643.pdbqt	ZINC000000000882	ade	-6.1	-6.1	-5.9	-6.03333	0.11547
fda_ligand_0644.pdbqt	ZINC000000000882	ade	-6	-5.9	-5.9	-5.93333	0.057735
fda_ligand_0645.pdbqt	ZINC000000049154	pyridoxine	-5.9	-5.8	-6	-5.9	0.1
fda_ligand_0646.pdbqt	ZINC000022059926	gemifloxacin	-6.9	-7.2	-6.7	-6.93333	0.251661
fda_ligand_0647.pdbqt	ZINC000022116608	fenoldopam	-6.7	-7.3	-7.6	-7.2	0.458258
fda_ligand_0648.pdbqt	ZINC000022116608	fenoldopam	-6.7	-7.5	-7.8	-7.33333	0.568624
fda_ligand_0649.pdbqt	ZINC000000002176	timolol	-5.4	-5.6	-5.8	-5.6	0.2
fda_ligand_0650.pdbqt	ZINC000003952881	balsalazide	-6.6	-6.9	-6.6	-6.7	0.173205
fda_ligand_0651.pdbqt	ZINC000003955219	darunavir	-7.1	-6.8	-7.5	-7.13333	0.351188
fda_ligand_0652.pdbqt	ZINC000003964126	xarelto	-6.6	-6.9	-6.6	-6.7	0.173205
fda_ligand_0653.pdbqt	ZINC000003973334	aromasin	-7.2	-6.7	-6.9	-6.93333	0.251661
fda_ligand_0654.pdbqt	ZINC000003977764	fosinopril	-5.9	-5.9	-5.8	-5.86667	0.057735
fda_ligand_0655.pdbqt	ZINC000002008866	zyvox	-7.3	-7.3	-7.7	-7.43333	0.23094
fda_ligand_0656.pdbqt	ZINC000002016037	sertaconazole	-6.8	-6.9	-7.2	-6.96667	0.208167
fda_ligand_0657.pdbqt	ZINC000002016037	sertaconazole	-6.8	-6.9	-7.1	-6.93333	0.152753
fda_ligand_0658.pdbqt	ZINC000019362735	chlorcyclizine	-5.6	-5.4	-5.8	-5.6	0.2
fda_ligand_0659.pdbqt	ZINC000019362735	chlorcyclizine	-5.5	-5.6	-5.8	-5.63333	0.152753
fda_ligand_0660.pdbqt	ZINC000019362735	chlorcyclizine	-5.5	-5.5	-5.7	-5.56667	0.11547
fda_ligand_0661.pdbqt	ZINC000019362737	chlorcyclizine	-5.4	-5.3	-6.3	-5.66667	0.550757
fda_ligand_0662.pdbqt	ZINC000019362737	chlorcyclizine	-5.4	-5.3	-6.1	-5.6	0.43589
fda_ligand_0663.pdbqt	ZINC000019362737	chlorcyclizine	-5.4	-5.3	-6.6	-5.76667	0.723418
fda_ligand_0664.pdbqt	ZINC000019364222	hydroxyzine	-6	-6.1	-6	-6.03333	0.057735
fda_ligand_0665.pdbqt	ZINC000019364222	hydroxyzine	-6.2	-6.1	-6.2	-6.16667	0.057735
fda_ligand_0666.pdbqt	ZINC000019364222	hydroxyzine	-6.1	-6.2	-6.1	-6.13333	0.057735
fda_ligand_0667.pdbqt	ZINC000019364224	hydroxyzine	-5.9	-5.9	-6	-5.93333	0.057735
fda_ligand_0668.pdbqt	ZINC000019364224	hydroxyzine	-6.1	-6.1	-6.3	-6.16667	0.11547
fda_ligand_0669.pdbqt	ZINC000019364224	hydroxyzine	-6.1	-6.2	-6.2	-6.16667	0.057735
fda_ligand_0670.pdbqt	ZINC000019364229	cetirizine	-6	-6.4	-5.9	-6.1	0.264575
fda_ligand_0671.pdbqt	ZINC000019364229	cetirizine	-6.5	-6.5	-6.4	-6.46667	0.057735
fda_ligand_0672.pdbqt	ZINC000019364229	cetirizine	-6.3	-6.3	-6.2	-6.26667	0.057735
fda_ligand_0673.pdbqt	ZINC000002015928	abacavir	-6.7	-6.8	-7	-6.83333	0.152753
fda_ligand_0674.pdbqt	ZINC000003951740	lpv	-6.8	-6.2	-6.7	-6.56667	0.321455
fda_ligand_0675.pdbqt	ZINC000000075008	pilocarpine	-5.7	-5.9	-6	-5.86667	0.152753
fda_ligand_0676.pdbqt	ZINC000000075008	pilocarpine	-5.9	-5.7	-6	-5.86667	0.152753
fda_ligand_0677.pdbqt	ZINC000001530816	prilocaine	-5.3	-5.2	-5.6	-5.36667	0.208167
fda_ligand_0678.pdbqt	ZINC000001530816	prilocaine	-5.3	-5.5	-5.6	-5.46667	0.152753
fda_ligand_0679.pdbqt	ZINC000036294079	ketamine	-5.6	-5.5	-5.8	-5.63333	0.152753
fda_ligand_0680.pdbqt	ZINC000036294079	ketamine	-5.6	-5.5	-5.8	-5.63333	0.152753
fda_ligand_0681.pdbqt	ZINC000001482184	temodal	-6.7	-6.7	-7	-6.8	0.173205
fda_ligand_0682.pdbqt	ZINC000001530635	fcv	-6.1	-6.4	-7.6	-6.7	0.793725
fda_ligand_0683.pdbqt	ZINC000001530935	rabeprazole	-5.9	-5.9	-7.1	-6.3	0.69282
fda_ligand_0684.pdbqt	ZINC000001530688	maprotiline	-6.4	-6.6	-6.5	-6.5	0.1
fda_ligand_0685.pdbqt	ZINC000000000242	doxylamine	-5.4	-5.2	-6.5	-5.7	0.7
fda_ligand_0686.pdbqt	ZINC000000000242	doxylamine	-5.5	-5.2	-6.5	-5.73333	0.680686
fda_ligand_0687.pdbqt	ZINC000000000565	orphenadrine	-5.2	-5.3	-6.2	-5.56667	0.550757
fda_ligand_0688.pdbqt	ZINC000000000565	orphenadrine	-5.2	-4.8	-6.2	-5.4	0.72111
fda_ligand_0689.pdbqt	ZINC000000000128	carteolol	-5.9	-5.5	-6.5	-5.96667	0.503322
fda_ligand_0690.pdbqt	ZINC000001530974	butoconazole	-5.6	-5.8	-6.6	-6	0.52915
fda_ligand_0691.pdbqt	ZINC000001530974	butoconazole	-5.5	-5.8	-6.9	-6.06667	0.737111
fda_ligand_0692.pdbqt	ZINC000001530697	thioridazine	-5.8	-5.9	-6.3	-6	0.264575
fda_ligand_0693.pdbqt	ZINC000001530697	thioridazine	-5.8	-5.6	-6.1	-5.83333	0.251661
fda_ligand_0694.pdbqt	ZINC000001530697	thioridazine	-5.9	-5.8	-6.1	-5.93333	0.152753
fda_ligand_0695.pdbqt	ZINC000001530703	tolbutamide	-5.8	-5.8	-5.9	-5.83333	0.057735
fda_ligand_0696.pdbqt	ZINC000001530703	tolbutamide	-6.4	-6.6	-6.5	-6.5	0.1
fda_ligand_0697.pdbqt	ZINC000001530703	tolbutamide	-5.5	-5.7	-6.1	-5.76667	0.305505
fda_ligand_0698.pdbqt	ZINC000001530703	tolbutamide	-5.5	-5.5	-6.2	-5.73333	0.404145
fda_ligand_0699.pdbqt	ZINC000001530707	diskets	-5.4	-5.4	-6.2	-5.66667	0.46188
fda_ligand_0700.pdbqt	ZINC000001530948	thalomid	-7.2	-7.4	-7.3	-7.3	0.1
fda_ligand_0701.pdbqt	ZINC000018324776	vardenafil	-6.8	-7.1	-7	-6.96667	0.152753
fda_ligand_0702.pdbqt	ZINC000018324776	vardenafil	-7.2	-7.2	-6.9	-7.1	0.173205
fda_ligand_0703.pdbqt	ZINC000018324776	vardenafil	-6.8	-7.5	-7.5	-7.26667	0.404145
fda_ligand_0704.pdbqt	ZINC000013545634	pentobarbital	-6.5	-6.6	-6.6	-6.56667	0.057735
fda_ligand_0705.pdbqt	ZINC000013545634	pentobarbital	-6.2	-6.2	-6.6	-6.33333	0.23094
fda_ligand_0706.pdbqt	ZINC000000000353	tussin	-6.4	-6.2	-6.6	-6.4	0.2
fda_ligand_0707.pdbqt	ZINC000000020259	pseudoephedrine	-5.3	-5.3	-5.5	-5.36667	0.11547
fda_ligand_0708.pdbqt	ZINC000019632668	doxapram	-5.9	-5.7	-7.5	-6.36667	0.986577
fda_ligand_0709.pdbqt	ZINC000019632668	doxapram	-6.5	-6.1	-7.5	-6.7	0.72111
fda_ligand_0710.pdbqt	ZINC000019632917	chlordiazepoxide	-6.5	-6.6	-6.7	-6.6	0.1
fda_ligand_0711.pdbqt	ZINC000019632917	chlordiazepoxide	-6.4	-6.6	-7.5	-6.83333	0.585947
fda_ligand_0712.pdbqt	ZINC000019796155	clozapine	-7.2	-7.3	-6.5	-7	0.43589
fda_ligand_0713.pdbqt	ZINC000019796155	clozapine	-7.2	-7.3	-6.3	-6.93333	0.550757
fda_ligand_0714.pdbqt	ZINC000019632912	imiquimod	-6.2	-6.1	-6.2	-6.16667	0.057735
fda_ligand_0715.pdbqt	ZINC000019796080	inapsine	-7	-7	-6.3	-6.76667	0.404145
fda_ligand_0716.pdbqt	ZINC000019796080	inapsine	-6.9	-7.1	-6.7	-6.9	0.2
fda_ligand_0717.pdbqt	ZINC000019796080	inapsine	-6.9	-7.3	-7	-7.06667	0.208167
fda_ligand_0718.pdbqt	ZINC000017146904	albenza	-6	-6.1	-6.3	-6.13333	0.152753
fda_ligand_0719.pdbqt	ZINC000017146904	albenza	-5.9	-6.1	-6.5	-6.16667	0.305505
fda_ligand_0720.pdbqt	ZINC000018089317	dilatrate sr	-7.7	-7.8	-7.8	-7.76667	0.057735
fda_ligand_0721.pdbqt	ZINC000018099446	dtic	-5.8	-5.7	-6.2	-5.9	0.264575
fda_ligand_0722.pdbqt	ZINC000014263142	artemether	-6.4	-6.3	-7.5	-6.73333	0.665833
fda_ligand_0723.pdbqt	ZINC000018115268	cimetidine	-5.9	-5.7	-6	-5.86667	0.152753
fda_ligand_0724.pdbqt	ZINC000018115268	cimetidine	-5.8	-6.1	-6.3	-6.06667	0.251661
fda_ligand_0725.pdbqt	ZINC000019702309	tizanidine	-6.2	-7	-7.9	-7.03333	0.85049
fda_ligand_0726.pdbqt	ZINC000019702309	tizanidine	-6.8	-6.9	-7.7	-7.13333	0.493288
fda_ligand_0727.pdbqt	ZINC000019796158	loxapine	-6.6	-6.8	-6.6	-6.66667	0.11547
fda_ligand_0728.pdbqt	ZINC000019796158	loxapine	-6.6	-6.8	-6.6	-6.66667	0.11547
fda_ligand_0729.pdbqt	ZINC000013831130	raltegravir	-8.1	-8.2	-8.3	-8.2	0.1
fda_ligand_0730.pdbqt	ZINC000013831130	raltegravir	-8.1	-8.2	-8.5	-8.26667	0.208167
fda_ligand_0731.pdbqt	ZINC000014210457	victrelis	-6.5	-6.7	-6.7	-6.63333	0.11547
fda_ligand_0732.pdbqt	ZINC000014879972	gar-936	-7.2	-7.6	-7.1	-7.3	0.264575
fda_ligand_0733.pdbqt	ZINC000014879992	minocycline	-7.5	-8	-7.4	-7.63333	0.321455
fda_ligand_0734.pdbqt	ZINC000014879992	minocycline	-7.3	-7.8	-7.3	-7.46667	0.288675
fda_ligand_0735.pdbqt	ZINC000014879992	minocycline	-7.5	-8	-7.4	-7.63333	0.321455
fda_ligand_0736.pdbqt	ZINC000014879992	minocycline	-7.3	-7.8	-7.2	-7.43333	0.321455
fda_ligand_0737.pdbqt	ZINC000014210455	victrelis	-6.4	-6.6	-6.5	-6.5	0.1
fda_ligand_0738.pdbqt	ZINC000019632670	doxapram	-5.8	-6.3	-6.4	-6.16667	0.321455
fda_ligand_0739.pdbqt	ZINC000019632670	doxapram	-5.7	-6.6	-7.1	-6.46667	0.70946
fda_ligand_0740.pdbqt	ZINC000019632834	zopiclone	-7.1	-7.4	-7	-7.16667	0.208167
fda_ligand_0741.pdbqt	ZINC000019632834	zopiclone	-7.1	-7.4	-7	-7.16667	0.208167
fda_ligand_0742.pdbqt	ZINC000019632834	zopiclone	-7.1	-7.4	-7	-7.16667	0.208167
fda_ligand_0743.pdbqt	ZINC000019796018	prochlorperazine	-5.9	-6	-6	-5.96667	0.057735
fda_ligand_0744.pdbqt	ZINC000019796018	prochlorperazine	-6	-6.1	-5.7	-5.93333	0.208167
fda_ligand_0745.pdbqt	ZINC000019796018	prochlorperazine	-5.9	-6	-6	-5.96667	0.057735
fda_ligand_0746.pdbqt	ZINC000035999642	ketamine	-6.1	-5.9	-6	-6	0.1
fda_ligand_0747.pdbqt	ZINC000035999642	ketamine	-6.1	-5.9	-6.1	-6.03333	0.11547
fda_ligand_0748.pdbqt	ZINC000018279854	gemcitabine	-7	-7	-7.9	-7.3	0.519615
fda_ligand_0749.pdbqt	ZINC000013537284	alosetron	-6.9	-7	-6.6	-6.83333	0.208167
fda_ligand_0750.pdbqt	ZINC000013537284	alosetron	-6.9	-7	-6.6	-6.83333	0.208167
fda_ligand_0751.pdbqt	ZINC000013597823	videx	-6.9	-7.1	-7.5	-7.16667	0.305505
fda_ligand_0752.pdbqt	ZINC000013597823	videx	-6.7	-6.9	-7.3	-6.96667	0.305505
fda_ligand_0753.pdbqt	ZINC000013682481	elvitegravir	-6.3	-6.4	-6.5	-6.4	0.1
fda_ligand_0754.pdbqt	ZINC000013682481	elvitegravir	-6.3	-6.3	-6.3	-6.3	0
fda_ligand_0755.pdbqt	ZINC000000000083	ZINC83	-5	-5.1	-5.8	-5.3	0.43589
fda_ligand_0756.pdbqt	ZINC000019594557	meclizine	-6	-6.3	-6.5	-6.26667	0.251661
fda_ligand_0757.pdbqt	ZINC000019594557	meclizine	-6.6	-6.2	-6.4	-6.4	0.2
fda_ligand_0758.pdbqt	ZINC000019632618	imatinib	-7.6	-7.5	-7.7	-7.6	0.1
fda_ligand_0759.pdbqt	ZINC000019632618	imatinib	-7.3	-7.4	-7.8	-7.5	0.264575
fda_ligand_0760.pdbqt	ZINC000019632618	imatinib	-7.5	-7.4	-7.8	-7.56667	0.208167
fda_ligand_0761.pdbqt	ZINC000014768621	chlorhexidine	-6.8	-6.7	-7.5	-7	0.43589
fda_ligand_0762.pdbqt	ZINC000014768621	chlorhexidine	-7.6	-7	-6.8	-7.13333	0.416333
fda_ligand_0763.pdbqt	ZINC000019361042	meclizine	-6.4	-6.2	-7.1	-6.56667	0.472582
fda_ligand_0764.pdbqt	ZINC000019361042	meclizine	-6.3	-6.3	-7.2	-6.6	0.519615
fda_ligand_0765.pdbqt	ZINC000006021043	ice	-4.7	-4.8	-5.4	-4.96667	0.378594
fda_ligand_0766.pdbqt	ZINC000006094354	aloxi	-6.9	-7.2	-7.2	-7.1	0.173205
fda_ligand_0767.pdbqt	ZINC000006094354	aloxi	-6.7	-6.9	-7	-6.86667	0.152753
fda_ligand_0768.pdbqt	ZINC000000004785	tegretol	-7.2	-7.5	-7	-7.23333	0.251661
fda_ligand_0769.pdbqt	ZINC000019364242	edt	-6.5	-6.9	-6.7	-6.7	0.2
fda_ligand_0770.pdbqt	ZINC000019364242	edt	-6.6	-6.7	-6.9	-6.73333	0.152753
fda_ligand_0771.pdbqt	ZINC000019419017	magnevist	-6.6	-6.7	-6.7	-6.66667	0.057735
fda_ligand_0772.pdbqt	ZINC000019419017	magnevist	-6.7	-6.4	-6.6	-6.56667	0.152753
fda_ligand_0773.pdbqt	ZINC000019419017	magnevist	-6.6	-6.7	-7.3	-6.86667	0.378594
fda_ligand_0774.pdbqt	ZINC000019594599	ticlopidine	-5.6	-5.3	-5.4	-5.43333	0.152753
fda_ligand_0775.pdbqt	ZINC000019594599	ticlopidine	-5.5	-5.3	-5.4	-5.4	0.1
fda_ligand_0776.pdbqt	ZINC000019594599	ticlopidine	-5.5	-5.4	-5.4	-5.43333	0.057735
fda_ligand_0777.pdbqt	ZINC000019364230	cetirizine	-6.1	-6.1	-5.9	-6.03333	0.11547
fda_ligand_0778.pdbqt	ZINC000019364230	cetirizine	-6.4	-6.6	-6.3	-6.43333	0.152753
fda_ligand_0779.pdbqt	ZINC000019364230	cetirizine	-6.3	-6.3	-6.2	-6.26667	0.057735
fda_ligand_0780.pdbqt	ZINC000019418959	trifluoperazine	-6.2	-6.1	-6.6	-6.3	0.264575
fda_ligand_0781.pdbqt	ZINC000019418959	trifluoperazine	-6.3	-6.4	-6.3	-6.33333	0.057735
fda_ligand_0782.pdbqt	ZINC000019418959	trifluoperazine	-6.5	-6.1	-6.6	-6.4	0.264575
fda_ligand_0783.pdbqt	ZINC000019594594	pramoxine	-5.1	-5.2	-5.8	-5.36667	0.378594
fda_ligand_0784.pdbqt	ZINC000019594594	pramoxine	-4.8	-5.1	-5.4	-5.1	0.3
fda_ligand_0785.pdbqt	ZINC000014210642	edarbi	-7.4	-7.2	-7.7	-7.43333	0.251661
fda_ligand_0786.pdbqt	ZINC000014210642	edarbi	-7.4	-7.6	-7.7	-7.56667	0.152753
fda_ligand_0787.pdbqt	ZINC000001530706	diskets	-5.2	-5.1	-6.2	-5.5	0.608276
fda_ligand_0788.pdbqt	ZINC000001530710	tridione	-5.4	-5.5	-5.5	-5.46667	0.057735
fda_ligand_0789.pdbqt	ZINC000001530713	valacyclovir	-6.5	-6.2	-7.3	-6.66667	0.568624
fda_ligand_0790.pdbqt	ZINC000001530713	valacyclovir	-6.5	-6.5	-7.2	-6.73333	0.404145
fda_ligand_0791.pdbqt	ZINC000001530716	metoclopramide	-4.9	-5.6	-5.9	-5.46667	0.51316
fda_ligand_0792.pdbqt	ZINC000001481815	exjade	-6.8	-6.8	-6.5	-6.7	0.173205
fda_ligand_0793.pdbqt	ZINC000001481815	exjade	-6.8	-6.8	-6.8	-6.8	0
fda_ligand_0794.pdbqt	ZINC000001481833	varenicline	-6.1	-6.4	-7.9	-6.8	0.964365
fda_ligand_0795.pdbqt	ZINC000001481910	propylhexedrine	-4.8	-4.8	-5.5	-5.03333	0.404145
fda_ligand_0796.pdbqt	ZINC000001481956	paliperidone	-7.2	-7.4	-7.4	-7.33333	0.11547
fda_ligand_0797.pdbqt	ZINC000001481956	paliperidone	-7.2	-7.4	-7.2	-7.26667	0.11547
fda_ligand_0798.pdbqt	ZINC000001536779	duloxetine	-5.9	-6	-6.6	-6.16667	0.378594
fda_ligand_0799.pdbqt	ZINC000001530814	bupivacaine	-6.2	-6.2	-6.4	-6.26667	0.11547
fda_ligand_0800.pdbqt	ZINC000001530814	bupivacaine	-6.1	-6.3	-6.1	-6.16667	0.11547
fda_ligand_0801.pdbqt	ZINC000001530814	bupivacaine	-6.1	-6.3	-6.1	-6.16667	0.11547
fda_ligand_0802.pdbqt	ZINC000001530817	prilocaine	-5.1	-5.5	-5.4	-5.33333	0.208167
fda_ligand_0803.pdbqt	ZINC000001530817	prilocaine	-5.4	-5.3	-5.4	-5.36667	0.057735
fda_ligand_0804.pdbqt	ZINC000000001145	ciclopirox	-6.1	-6.2	-5.9	-6.06667	0.152753
fda_ligand_0805.pdbqt	ZINC000000001145	ciclopirox	-6.2	-6	-6.1	-6.1	0.1
fda_ligand_0806.pdbqt	ZINC000000389149	metipranolol	-6.1	-6.2	-5.9	-6.06667	0.152753
fda_ligand_0807.pdbqt	ZINC000001530736	axid	-5.2	-5.5	-5.2	-5.3	0.173205
fda_ligand_0808.pdbqt	ZINC000001530736	axid	-5.6	-5.6	-5.4	-5.53333	0.11547
fda_ligand_0809.pdbqt	ZINC000001530760	rythmol	-6	-5.7	-6.7	-6.13333	0.51316
fda_ligand_0810.pdbqt	ZINC000001530912	emedastine	-6	-6.1	-6.7	-6.26667	0.378594
fda_ligand_0811.pdbqt	ZINC000001530912	emedastine	-5.9	-6.2	-6.6	-6.23333	0.351188
fda_ligand_0812.pdbqt	ZINC000001530912	emedastine	-5.8	-6.1	-6.6	-6.16667	0.404145
fda_ligand_0813.pdbqt	ZINC000001530621	dorzolamide	-7.3	-7.4	-7.8	-7.5	0.264575
fda_ligand_0814.pdbqt	ZINC000001530621	dorzolamide	-7	-7.2	-7.8	-7.33333	0.416333
fda_ligand_0815.pdbqt	ZINC000000006157	epinastine	-7.3	-7.6	-7.2	-7.36667	0.208167
fda_ligand_0816.pdbqt	ZINC000000006427	diazepam	-5.9	-6.2	-8.4	-6.83333	1.36504
fda_ligand_0817.pdbqt	ZINC000000007295	eslicarbazepine acetate	-7	-6.9	-7.8	-7.23333	0.493288
fda_ligand_0818.pdbqt	ZINC000000007673	vimpat	-6.1	-6.4	-6.4	-6.3	0.173205
fda_ligand_0819.pdbqt	ZINC000001533877	ibandronate	-5.2	-5.2	-5.9	-5.43333	0.404145
fda_ligand_0820.pdbqt	ZINC000001533877	ibandronate	-5	-5.2	-5.5	-5.23333	0.251661
fda_ligand_0821.pdbqt	ZINC000001533877	ibandronate	-5.2	-5.3	-5.6	-5.36667	0.208167
fda_ligand_0822.pdbqt	ZINC000001533877	ibandronate	-5.1	-5.2	-5.7	-5.33333	0.321455
fda_ligand_0823.pdbqt	ZINC000001533877	ibandronate	-5.3	-5.2	-5	-5.16667	0.152753
fda_ligand_0824.pdbqt	ZINC000001533877	ibandronate	-5.2	-4.9	-5.7	-5.26667	0.404145
fda_ligand_0825.pdbqt	ZINC000003831128	ZINC3831128	-7.4	-6.7	-7	-7.03333	0.351188
fda_ligand_0826.pdbqt	ZINC000003920657	ZINC3920657	-8	-7.4	-7.5	-7.63333	0.321455
fda_ligand_0827.pdbqt	ZINC000003938695	ZINC3938695	-6.6	-6.9	-6.3	-6.6	0.3
fda_ligand_0828.pdbqt	ZINC000008214619	ZINC8214619	-6.4	-5.4	-5.2	-5.66667	0.64291
fda_ligand_0829.pdbqt	ZINC000084758235	telotristat	-6.7	-7	-6.6	-6.76667	0.208167
fda_ligand_0830.pdbqt	ZINC000410428674	ZINC410428674	-6.5	-6.4	-6.7	-6.53333	0.152753
fda_ligand_0831.pdbqt	ZINC000003803652	zoledronate	-5.8	-6.1	-6.5	-6.13333	0.351188
fda_ligand_0832.pdbqt	ZINC000003812865	olsalazine	-7.2	-7.2	-7.6	-7.33333	0.23094
fda_ligand_0833.pdbqt	ZINC000003812974	corgard	-5.6	-5.7	-6	-5.76667	0.208167
fda_ligand_0834.pdbqt	ZINC000004212854	topicort	-7.2	-7.2	-7.4	-7.26667	0.11547
fda_ligand_0835.pdbqt	ZINC000004097476	diatrizoate	-4.4	-4.6	-5.6	-4.86667	0.64291
fda_ligand_0836.pdbqt	ZINC000004099200	pantoprazole	-6.6	-6.7	-6.5	-6.6	0.1
fda_ligand_0837.pdbqt	ZINC000004099200	pantoprazole	-6.6	-6.9	-6.6	-6.7	0.173205
fda_ligand_0838.pdbqt	ZINC000004212945	dfba	-7.7	-7.4	-7.8	-7.63333	0.208167
fda_ligand_0839.pdbqt	ZINC000000538065	nefazodone	-6.8	-6.7	-6.6	-6.7	0.1
fda_ligand_0840.pdbqt	ZINC000000538065	nefazodone	-6.7	-6.5	-6.6	-6.6	0.1
fda_ligand_0841.pdbqt	ZINC000000538312	risperdal	-6.9	-7.3	-7	-7.06667	0.208167
fda_ligand_0842.pdbqt	ZINC000000538312	risperdal	-7	-7.1	-7	-7.03333	0.057735
fda_ligand_0843.pdbqt	ZINC000000020253	thalitone	-7.1	-7.3	-7.5	-7.3	0.2
fda_ligand_0844.pdbqt	ZINC000000020221	nabumetona	-5.9	-6	-6.7	-6.2	0.43589
fda_ligand_0845.pdbqt	ZINC000004393164	aliskiren	-5.3	-5.5	-5.1	-5.3	0.2
fda_ligand_0846.pdbqt	ZINC000000537752	flurazepam	-6.1	-6.2	-6.1	-6.13333	0.057735
fda_ligand_0847.pdbqt	ZINC000000537752	flurazepam	-6.2	-6.1	-6	-6.1	0.1
fda_ligand_0848.pdbqt	ZINC000000537795	glipizide	-7	-7	-7.3	-7.1	0.173205
fda_ligand_0849.pdbqt	ZINC000000537795	glipizide	-6.8	-7	-7.4	-7.06667	0.305505
fda_ligand_0850.pdbqt	ZINC000000537795	glipizide	-7.1	-6.9	-7.3	-7.1	0.2
fda_ligand_0851.pdbqt	ZINC000000537795	glipizide	-6.9	-6.8	-7.1	-6.93333	0.152753
fda_ligand_0852.pdbqt	ZINC000000537928	loperamide	-6.6	-6.7	-6.6	-6.63333	0.057735
fda_ligand_0853.pdbqt	ZINC000000537957	mebrofenin	-6.6	-6.4	-6.6	-6.53333	0.11547
fda_ligand_0854.pdbqt	ZINC000000538621	olmesartan	-7.7	-7.8	-8.1	-7.86667	0.208167
fda_ligand_0855.pdbqt	ZINC000000538621	olmesartan	-7.7	-8	-8	-7.9	0.173205
fda_ligand_0856.pdbqt	ZINC000000001267	methylphenidate	-5.3	-5.3	-6.1	-5.56667	0.46188
fda_ligand_0857.pdbqt	ZINC000000001331	doxepin	-6.1	-6	-6.5	-6.2	0.264575
fda_ligand_0858.pdbqt	ZINC000000001370	estazolam	-6.4	-6.5	-6.7	-6.53333	0.152753
fda_ligand_0859.pdbqt	ZINC000012466082	luvox	-5.8	-5.6	-6.2	-5.86667	0.305505
fda_ligand_0860.pdbqt	ZINC000012466082	luvox	-6.1	-6.2	-6.6	-6.3	0.264575
fda_ligand_0861.pdbqt	ZINC000000007782	banzel	-7.7	-7.8	-7.6	-7.7	0.1
fda_ligand_0862.pdbqt	ZINC000000013156	lamictal	-6.8	-6.9	-7	-6.9	0.1
fda_ligand_0863.pdbqt	ZINC000000013156	lamictal	-6.6	-6.6	-6.9	-6.7	0.173205
fda_ligand_0864.pdbqt	ZINC000000538627	ambrisentan	-6.9	-7.1	-7.2	-7.06667	0.152753
fda_ligand_0865.pdbqt	ZINC000000538658	samsca	-6.7	-6.7	-7	-6.8	0.173205
fda_ligand_0866.pdbqt	ZINC000000001464	romazicon	-6.6	-6.7	-7.8	-7.03333	0.665833
fda_ligand_0867.pdbqt	ZINC000000601254	zaroxolyn	-6.7	-7	-6.8	-6.83333	0.152753
fda_ligand_0868.pdbqt	ZINC000000601281	alfentanil	-6.6	-6.8	-6.9	-6.76667	0.152753
fda_ligand_0869.pdbqt	ZINC000000601281	alfentanil	-6.4	-6.1	-6.8	-6.43333	0.351188
fda_ligand_0870.pdbqt	ZINC000000601283	indomethacin	-6.9	-7.1	-7.3	-7.1	0.2
fda_ligand_0871.pdbqt	ZINC000006716957	nilotinib	-8.1	-8.3	-8.2	-8.2	0.1
fda_ligand_0872.pdbqt	ZINC000006716957	nilotinib	-8.2	-8.3	-8.5	-8.33333	0.152753
fda_ligand_0873.pdbqt	ZINC000004475353	sulindac	-6.5	-6.9	-6.8	-6.73333	0.208167
fda_ligand_0874.pdbqt	ZINC000004618208	rabeprazole	-5.7	-6.2	-6.5	-6.13333	0.404145
fda_ligand_0875.pdbqt	ZINC000004640636	procasil	-5.7	-5.7	-5.6	-5.66667	0.057735
fda_ligand_0876.pdbqt	ZINC000004640636	procasil	-5.5	-5.5	-5.5	-5.5	0
fda_ligand_0877.pdbqt	ZINC000004655029	bedaquiline	-6.4	-6.5	-6.2	-6.36667	0.152753
fda_ligand_0878.pdbqt	ZINC000004655029	bedaquiline	-6.5	-6.7	-5.9	-6.36667	0.416333
fda_ligand_0879.pdbqt	ZINC000002525885	desvenlafaxine	-5.6	-5.8	-6.9	-6.1	0.7
fda_ligand_0880.pdbqt	ZINC000002525885	desvenlafaxine	-5.5	-5.5	-6.9	-5.96667	0.80829
fda_ligand_0881.pdbqt	ZINC000004676424	pantoprazole	-6.8	-6.7	-7	-6.83333	0.152753
fda_ligand_0882.pdbqt	ZINC000004676424	pantoprazole	-6.4	-6.3	-7.2	-6.63333	0.493288
fda_ligand_0883.pdbqt	ZINC000001530718	metoprolol	-5.6	-5.5	-6.2	-5.76667	0.378594
fda_ligand_0884.pdbqt	ZINC000001530973	butoconazole	-5.6	-5.8	-6.8	-6.06667	0.64291
fda_ligand_0885.pdbqt	ZINC000001530973	butoconazole	-6	-6.1	-7	-6.36667	0.550757
fda_ligand_0886.pdbqt	ZINC000001530947	thalomid	-6.9	-6.9	-7.4	-7.06667	0.288675
fda_ligand_0887.pdbqt	ZINC000001530725	lysodren	-5.5	-5	-5.6	-5.36667	0.321455
fda_ligand_0888.pdbqt	ZINC000001530775	pentamidine	-6.2	-6.5	-6.1	-6.26667	0.208167
fda_ligand_0889.pdbqt	ZINC000001530975	butenafine	-5.2	-5.3	-5.8	-5.43333	0.321455
fda_ligand_0890.pdbqt	ZINC000001530975	butenafine	-5.5	-6.2	-5.8	-5.83333	0.351188
fda_ligand_0891.pdbqt	ZINC000001530977	naftifine	-5.4	-5.3	-5.8	-5.5	0.264575
fda_ligand_0892.pdbqt	ZINC000001530977	naftifine	-5.4	-5.4	-6.8	-5.86667	0.80829
fda_ligand_0893.pdbqt	ZINC000001530977	naftifine	-5.6	-6	-5.2	-5.6	0.4
fda_ligand_0894.pdbqt	ZINC000001530950	soma	-6.5	-6.7	-6.5	-6.56667	0.11547
fda_ligand_0895.pdbqt	ZINC000001530759	rythmol	-5.6	-5.7	-6.7	-6	0.608276
fda_ligand_0896.pdbqt	ZINC000001530764	protriptyline	-6.3	-6.9	-7.3	-6.83333	0.503322
fda_ligand_0897.pdbqt	ZINC000001530811	tetracaine	-4.9	-4.8	-6	-5.23333	0.665833
fda_ligand_0898.pdbqt	ZINC000001530811	tetracaine	-4.8	-4.9	-5.6	-5.1	0.43589
fda_ligand_0899.pdbqt	ZINC000001530641	lopid	-5.2	-5.4	-5.7	-5.43333	0.251661
fda_ligand_0900.pdbqt	ZINC000004097308	cordran	-7.7	-7.6	-7.9	-7.73333	0.152753
fda_ligand_0901.pdbqt	ZINC000004097309	ZINC4097309	-5.6	-5.8	-6.4	-5.93333	0.416333
fda_ligand_0902.pdbqt	ZINC000004097310	ZINC4097310	-5.8	-5.8	-6.3	-5.96667	0.288675
fda_ligand_0903.pdbqt	ZINC000002019953	articaine	-5.7	-5.6	-5.7	-5.66667	0.057735
fda_ligand_0904.pdbqt	ZINC000002019953	articaine	-5.9	-6	-6	-5.96667	0.057735
fda_ligand_0905.pdbqt	ZINC000085537053	docetaxel	-5.4	-5.7	-5.9	-5.66667	0.251661
fda_ligand_0906.pdbqt	ZINC000000156792	acebutolol	-5.8	-5.6	-6.4	-5.93333	0.416333
fda_ligand_0907.pdbqt	ZINC000085537014	cobicistat	-6.6	-6.9	-7.1	-6.86667	0.251661
fda_ligand_0908.pdbqt	ZINC000085537014	cobicistat	-6	-5.5	-7.2	-6.23333	0.873689
fda_ligand_0909.pdbqt	ZINC000000607790	colcrys	-7.1	-6.6	-6.1	-6.6	0.5
fda_ligand_0910.pdbqt	ZINC000002522648	methylphenidate	-5.8	-5.4	-6.2	-5.8	0.4
fda_ligand_0911.pdbqt	ZINC000002522669	fentanyl	-6	-6.2	-6.4	-6.2	0.2
fda_ligand_0912.pdbqt	ZINC000002522669	fentanyl	-5.8	-6	-6.4	-6.06667	0.305505
fda_ligand_0913.pdbqt	ZINC000002510358	phenytoin	-6.6	-6.8	-7.8	-7.06667	0.64291
fda_ligand_0914.pdbqt	ZINC000002510358	phenytoin	-6.6	-7.2	-7.8	-7.2	0.6
fda_ligand_0915.pdbqt	ZINC000001530572	myleran	-4.9	-5.2	-6.2	-5.43333	0.680686
fda_ligand_0916.pdbqt	ZINC000001530613	dicyclomine	-5.3	-5.4	-5.3	-5.33333	0.057735
fda_ligand_0917.pdbqt	ZINC000001530613	dicyclomine	-5.4	-5.3	-5.3	-5.33333	0.057735
fda_ligand_0918.pdbqt	ZINC000000155531	cyclopentolate	-5.6	-5.5	-6.5	-5.86667	0.550757
fda_ligand_0919.pdbqt	ZINC000000155531	cyclopentolate	-5.8	-5.8	-6.5	-6.03333	0.404145
fda_ligand_0920.pdbqt	ZINC000001530599	chlorporpamide	-5.7	-5.7	-5.7	-5.7	0
fda_ligand_0921.pdbqt	ZINC000001530599	chlorporpamide	-6.2	-6.2	-6.1	-6.16667	0.057735
fda_ligand_0922.pdbqt	ZINC000001530599	chlorporpamide	-6.2	-5.7	-6.5	-6.13333	0.404145
fda_ligand_0923.pdbqt	ZINC000001530599	chlorporpamide	-5.5	-5.6	-6.4	-5.83333	0.493288
fda_ligand_0924.pdbqt	ZINC000001530601	clomifene	-5.2	-5.8	-5.8	-5.6	0.34641
fda_ligand_0925.pdbqt	ZINC000001530812	bupivacaine	-6.1	-6.4	-6.6	-6.36667	0.251661
fda_ligand_0926.pdbqt	ZINC000001530812	bupivacaine	-5.9	-6	-6.7	-6.2	0.43589
fda_ligand_0927.pdbqt	ZINC000001530812	bupivacaine	-5.9	-6.3	-6.5	-6.23333	0.305505
fda_ligand_0928.pdbqt	ZINC000001530939	dibucaine	-5.7	-5.7	-6.1	-5.83333	0.23094
fda_ligand_0929.pdbqt	ZINC000001529425	hepin	-5.1	-5.2	-4.9	-5.06667	0.152753
fda_ligand_0930.pdbqt	ZINC000001530618	disopyramide	-5.6	-5.4	-6.6	-5.86667	0.64291
fda_ligand_0931.pdbqt	ZINC000001531009	risedronate	-6	-5.8	-7.1	-6.3	0.7
fda_ligand_0932.pdbqt	ZINC000001531009	risedronate	-5.9	-5.9	-6.8	-6.2	0.519615
fda_ligand_0933.pdbqt	ZINC000001531009	risedronate	-5.9	-5.9	-6.8	-6.2	0.519615
fda_ligand_0934.pdbqt	ZINC000001532179	sensible	-4.6	-4.2	-5.5	-4.76667	0.665833
fda_ligand_0935.pdbqt	ZINC000001530571	buspirone	-6.7	-6.8	-7.2	-6.9	0.264575
fda_ligand_0936.pdbqt	ZINC000001530571	buspirone	-6.8	-6.7	-6.8	-6.76667	0.057735
fda_ligand_0937.pdbqt	ZINC000002019954	articaine	-5.6	-5.6	-5.9	-5.7	0.173205
fda_ligand_0938.pdbqt	ZINC000002019954	articaine	-5.5	-5.6	-5.9	-5.66667	0.208167
fda_ligand_0939.pdbqt	ZINC000000002273	orciprenaline	-5.8	-5.7	-6.5	-6	0.43589
fda_ligand_0940.pdbqt	ZINC000000002647	ibuprofen	-5.1	-5.2	-6.3	-5.53333	0.665833
fda_ligand_0941.pdbqt	ZINC000004097404	vecuronium	-6.3	-6.2	-6	-6.16667	0.152753
fda_ligand_0942.pdbqt	ZINC000000538550	ziprasidone	-7.2	-7.7	-8.5	-7.8	0.655744
fda_ligand_0943.pdbqt	ZINC000000538550	ziprasidone	-7.6	-7.6	-8.3	-7.83333	0.404145
fda_ligand_0944.pdbqt	ZINC000002032615	nix	-6	-6.1	-6.4	-6.16667	0.208167
fda_ligand_0945.pdbqt	ZINC000004097286	budesonide	-8.2	-8.6	-8.5	-8.43333	0.208167
fda_ligand_0946.pdbqt	ZINC000004097305	flunisolide	-7.7	-7.6	-7.9	-7.73333	0.152753
fda_ligand_0947.pdbqt	ZINC000000000096	dexbrompheniramine	-5.3	-5.8	-6.6	-5.9	0.655744
fda_ligand_0948.pdbqt	ZINC000000004321	zonegran	-7.4	-7.4	-8	-7.6	0.34641
fda_ligand_0949.pdbqt	ZINC000004175630	orap	-6.6	-6.8	-6.4	-6.6	0.2
fda_ligand_0950.pdbqt	ZINC000004175630	orap	-6.6	-7.1	-7.7	-7.13333	0.550757
fda_ligand_0951.pdbqt	ZINC000004213946	nebivolol	-6.1	-6	-7.5	-6.53333	0.83865
fda_ligand_0952.pdbqt	ZINC000004213946	nebivolol	-6.2	-6	-6.6	-6.26667	0.305505
fda_ligand_0953.pdbqt	ZINC000000538273	ofloxacin	-7.2	-7.6	-7.6	-7.46667	0.23094
fda_ligand_0954.pdbqt	ZINC000000538273	ofloxacin	-7.3	-7.6	-7.6	-7.5	0.173205
fda_ligand_0955.pdbqt	ZINC000004097392	suprane	-5.1	-5	-5	-5.03333	0.057735
fda_ligand_0956.pdbqt	ZINC000004097343	itc	-6.7	-6.6	-7.2	-6.83333	0.321455
fda_ligand_0957.pdbqt	ZINC000004097225	imipenem	-7.2	-7.1	-7.1	-7.13333	0.057735
fda_ligand_0958.pdbqt	ZINC000004097426	glyset	-6.5	-6.5	-6.7	-6.56667	0.11547
fda_ligand_0959.pdbqt	ZINC000004097426	glyset	-6.3	-6.3	-6.7	-6.43333	0.23094
fda_ligand_0960.pdbqt	ZINC000004097426	glyset	-6.4	-6.5	-6.7	-6.53333	0.152753
fda_ligand_0961.pdbqt	ZINC000003860453	ak-fluor	-8.5	-8.2	-8.3	-8.33333	0.152753
fda_ligand_0962.pdbqt	ZINC000003875259	diovan	-6.3	-7.1	-6.4	-6.6	0.43589
fda_ligand_0963.pdbqt	ZINC000003875259	diovan	-6.3	-7.1	-6.3	-6.56667	0.46188
fda_ligand_0964.pdbqt	ZINC000003875980	nafcillin	-6.6	-6.8	-7	-6.8	0.2
fda_ligand_0965.pdbqt	ZINC000003918138	zanamivir	-7.2	-7.3	-8.2	-7.56667	0.550757
fda_ligand_0966.pdbqt	ZINC000000402954	hydromorphone	-6.9	-7.5	-7.2	-7.2	0.3
fda_ligand_0967.pdbqt	ZINC000000402954	hydromorphone	-7.4	-7.6	-7.9	-7.63333	0.251661
fda_ligand_0968.pdbqt	ZINC000000402954	hydromorphone	-6.9	-7.5	-7.6	-7.33333	0.378594
fda_ligand_0969.pdbqt	ZINC000001895505	bazedoxifene	-6.3	-5.6	-5.9	-5.93333	0.351188
fda_ligand_0970.pdbqt	ZINC000003775644	proflavine	-6.1	-6.1	-7.2	-6.46667	0.635085
fda_ligand_0971.pdbqt	ZINC000003775644	proflavine	-6	-6	-7.2	-6.4	0.69282
fda_ligand_0972.pdbqt	ZINC000003782807	nedocromil	-7	-7.2	-7.2	-7.13333	0.11547
fda_ligand_0973.pdbqt	ZINC000003798064	ZINC3798064	-6.7	-6.7	-7.3	-6.9	0.34641
fda_ligand_0974.pdbqt	ZINC000003800475	treprostinil	-6.3	-6.6	-6.9	-6.6	0.3
fda_ligand_0975.pdbqt	ZINC000003808779	meropenem	-6.6	-6.4	-6.8	-6.6	0.2
fda_ligand_0976.pdbqt	ZINC000003812913	apl-202	-5.1	-4.9	-6.4	-5.46667	0.814453
fda_ligand_0977.pdbqt	ZINC000000508068	pheniramine	-5.3	-5.2	-6.5	-5.66667	0.723418
fda_ligand_0978.pdbqt	ZINC000000491073	galantamine	-6.4	-6.3	-6.6	-6.43333	0.152753
fda_ligand_0979.pdbqt	ZINC000000491073	galantamine	-6.3	-6.4	-7.3	-6.66667	0.550757
fda_ligand_0980.pdbqt	ZINC000000491073	galantamine	-6.3	-6.3	-6.6	-6.4	0.173205
fda_ligand_0981.pdbqt	ZINC000001996117	darifenacin	-6.5	-6.5	-7	-6.66667	0.288675
fda_ligand_0982.pdbqt	ZINC000001996117	darifenacin	-6.7	-6.8	-6.9	-6.8	0.1
fda_ligand_0983.pdbqt	ZINC000001996784	myrbetriq	-5.8	-5.5	-6.4	-5.9	0.458258
fda_ligand_0984.pdbqt	ZINC000001997125	pomalyst	-7.3	-7.7	-7.3	-7.43333	0.23094
fda_ligand_0985.pdbqt	ZINC000001997127	imid3	-6.6	-6.7	-7.1	-6.8	0.264575
fda_ligand_0986.pdbqt	ZINC000000057533	mydriacyl	-5.5	-5.6	-6.5	-5.86667	0.550757
fda_ligand_0987.pdbqt	ZINC000000056646	pindolol	-5.7	-6.2	-6.1	-6	0.264575
fda_ligand_0988.pdbqt	ZINC000000057206	bupropion	-5.5	-5.4	-5.5	-5.46667	0.057735
fda_ligand_0989.pdbqt	ZINC000000057206	bupropion	-5.6	-5.5	-6.2	-5.76667	0.378594
fda_ligand_0990.pdbqt	ZINC000000057278	dobutamine	-5.7	-5.9	-7.4	-6.33333	0.929157
fda_ligand_0991.pdbqt	ZINC000003986735	sprycel	-6.9	-7.1	-6.7	-6.9	0.2
fda_ligand_0992.pdbqt	ZINC000003986735	sprycel	-7.1	-7.4	-6.7	-7.06667	0.351188
fda_ligand_0993.pdbqt	ZINC000003986735	sprycel	-7	-7.3	-7.4	-7.23333	0.208167
fda_ligand_0994.pdbqt	ZINC000004099009	vumon	-7.4	-7	-7.7	-7.36667	0.351188
fda_ligand_0995.pdbqt	ZINC000004212851	lokara	-7.5	-7.5	-7.8	-7.6	0.173205
fda_ligand_0996.pdbqt	ZINC000004214700	paliperidone	-7.3	-7.6	-7.4	-7.43333	0.152753
fda_ligand_0997.pdbqt	ZINC000004214700	paliperidone	-7	-7.6	-7.4	-7.33333	0.305505
fda_ligand_0998.pdbqt	ZINC000004340269	amiloride	-8	-8.1	-7.8	-7.96667	0.152753
fda_ligand_0999.pdbqt	ZINC000004340269	amiloride	-7.9	-8	-7.5	-7.8	0.264575
fda_ligand_1000.pdbqt	ZINC000000527386	paroxetine	-6.6	-6.4	-8	-7	0.87178
fda_ligand_1001.pdbqt	ZINC000000001382	ethacrynate	-6.2	-6	-6	-6.06667	0.11547
fda_ligand_1002.pdbqt	ZINC000003981610	rapivab	-6	-6.8	-6.3	-6.36667	0.404145
fda_ligand_1003.pdbqt	ZINC000003843198	uridine triacetate	-7.8	-7.6	-7.3	-7.56667	0.251661
fda_ligand_1004.pdbqt	ZINC000003875484	androxy	-7	-7.1	-7.1	-7.06667	0.057735
fda_ligand_1005.pdbqt	ZINC000003915154	alvesco	-7.7	-7.6	-7.4	-7.56667	0.152753
fda_ligand_1006.pdbqt	ZINC000000402909	fenoprofen	-6.1	-6.1	-6.8	-6.33333	0.404145
fda_ligand_1007.pdbqt	ZINC000000113426	tetrahydrozoline	-6.3	-6.5	-7.3	-6.7	0.52915
fda_ligand_1008.pdbqt	ZINC000003831138	apl-202	-5.3	-5.3	-6.2	-5.6	0.519615
fda_ligand_1009.pdbqt	ZINC000003831430	rimantadine	-5.6	-5.6	-6	-5.73333	0.23094
fda_ligand_1010.pdbqt	ZINC000003831475	dmsa	-4.7	-4.6	-4.5	-4.6	0.1
fda_ligand_1011.pdbqt	ZINC000003831531	tiagabine	-6.4	-6.4	-6.2	-6.33333	0.11547
fda_ligand_1012.pdbqt	ZINC000003831531	tiagabine	-6.5	-6.2	-6.2	-6.3	0.173205
fda_ligand_1013.pdbqt	ZINC000003830986	lansoprazole	-7.3	-7.5	-7.8	-7.53333	0.251661
fda_ligand_1014.pdbqt	ZINC000003977981	capex	-7.4	-7.7	-8	-7.7	0.3
fda_ligand_1015.pdbqt	ZINC000000057512	tolazamide	-5.8	-5.9	-7	-6.23333	0.665833
fda_ligand_1016.pdbqt	ZINC000000057512	tolazamide	-6.1	-6	-6.9	-6.33333	0.493288
fda_ligand_1017.pdbqt	ZINC000000057512	tolazamide	-6.2	-6.3	-6.9	-6.46667	0.378594
fda_ligand_1018.pdbqt	ZINC000000057512	tolazamide	-6	-6.1	-6.7	-6.26667	0.378594
fda_ligand_1019.pdbqt	ZINC000000057532	mydriacyl	-5.6	-5.7	-6.4	-5.9	0.43589
fda_ligand_1020.pdbqt	ZINC000038197764	zymar	-6.1	-6.7	-6.4	-6.4	0.3
fda_ligand_1021.pdbqt	ZINC000038197764	zymar	-6.1	-6.7	-6.4	-6.4	0.3
fda_ligand_1022.pdbqt	ZINC000006021033	amphetamine	-4.9	-5	-5.1	-5	0.1
fda_ligand_1023.pdbqt	ZINC000006036847	amphetamine	-4.5	-4.5	-5.1	-4.7	0.34641
fda_ligand_1024.pdbqt	ZINC000006382803	ZINC6382803	-6	-6.3	-6.1	-6.13333	0.152753
fda_ligand_1025.pdbqt	ZINC000006382803	ZINC6382803	-6.2	-6.3	-6.5	-6.33333	0.152753
fda_ligand_1026.pdbqt	ZINC000000000053	aspirin	-6.4	-6.3	-6.3	-6.33333	0.057735
fda_ligand_1027.pdbqt	ZINC000000643114	indapamide	-6.7	-6.7	-6.7	-6.7	0
fda_ligand_1028.pdbqt	ZINC000000643138	nizoral	-7	-6.6	-7.9	-7.16667	0.665833
fda_ligand_1029.pdbqt	ZINC000000643138	nizoral	-6.7	-7	-7.2	-6.96667	0.251661
fda_ligand_1030.pdbqt	ZINC000000002281	terbutaline	-5.7	-5.7	-6	-5.8	0.173205
fda_ligand_1031.pdbqt	ZINC000005162311	ilevro	-6.6	-6.5	-7.7	-6.93333	0.665833
fda_ligand_1032.pdbqt	ZINC000005179119	sulfacetamide	-6.1	-5.9	-6.5	-6.16667	0.305505
fda_ligand_1033.pdbqt	ZINC000005752191	psorcon	-7.1	-7.1	-7.2	-7.13333	0.057735
fda_ligand_1034.pdbqt	ZINC000000001735	minoxidil	-6	-6.5	-7.1	-6.53333	0.550757
fda_ligand_1035.pdbqt	ZINC000001552908	fesoterodine	-6.1	-5.6	-6.2	-5.96667	0.321455
fda_ligand_1036.pdbqt	ZINC000000000922	pas	-6	-6	-6	-6	0
fda_ligand_1037.pdbqt	ZINC000000009073	apomorphine	-6.7	-6.8	-7	-6.83333	0.152753
fda_ligand_1038.pdbqt	ZINC000000009073	apomorphine	-6.9	-7	-7.2	-7.03333	0.152753
fda_ligand_1039.pdbqt	ZINC000000009073	apomorphine	-6.7	-6.8	-7	-6.83333	0.152753
fda_ligand_1040.pdbqt	ZINC000150338698	capastat	-7.5	-7.9	-7.3	-7.56667	0.305505
fda_ligand_1041.pdbqt	ZINC000150338698	capastat	-7.5	-7.7	-7.4	-7.53333	0.152753
fda_ligand_1042.pdbqt	ZINC000001482113	ZINC1482113	-5.4	-5.5	-5.2	-5.36667	0.152753
fda_ligand_1043.pdbqt	ZINC000001531036	azelex	-5.9	-6.1	-5.9	-5.96667	0.11547
fda_ligand_1044.pdbqt	ZINC000000895081	citrate	-5.8	-5.8	-5.8	-5.8	0
fda_ligand_1045.pdbqt	ZINC000000895199	dopal	-6.8	-6.9	-7	-6.9	0.1
fda_ligand_1046.pdbqt	ZINC000000001554	acne	-5.6	-5.7	-5.6	-5.63333	0.057735
fda_ligand_1047.pdbqt	ZINC000000002055	salicylamide	-5.9	-5.8	-5.9	-5.86667	0.057735
fda_ligand_1048.pdbqt	ZINC000000002055	salicylamide	-5.8	-5.9	-6	-5.9	0.1
fda_ligand_1049.pdbqt	ZINC000000002159	ldt	-6.8	-7	-7.6	-7.13333	0.416333
fda_ligand_1050.pdbqt	ZINC000000020244	diphenhydramine	-4.8	-5.1	-6	-5.3	0.6245
fda_ligand_1051.pdbqt	ZINC000000020244	diphenhydramine	-5	-5	-6.2	-5.4	0.69282
fda_ligand_1052.pdbqt	ZINC000000056652	isoproterenol	-5.5	-5.8	-6.7	-6	0.6245
fda_ligand_1053.pdbqt	ZINC000000056653	isoproterenol	-5.7	-6.3	-6.6	-6.2	0.458258
fda_ligand_1054.pdbqt	ZINC000000113355	phenylephrine	-6	-6.1	-6	-6.03333	0.057735
fda_ligand_1055.pdbqt	ZINC000000391812	nicotine	-5.1	-5.2	-6.2	-5.5	0.608276
fda_ligand_1056.pdbqt	ZINC000000391812	nicotine	-5.2	-5.4	-5.8	-5.46667	0.305505
fda_ligand_1057.pdbqt	ZINC000000391812	nicotine	-5.2	-5.2	-6.3	-5.56667	0.635085
fda_ligand_1058.pdbqt	ZINC000000895302	mbn	-4.8	-4.8	-5.2	-4.93333	0.23094
fda_ligand_1059.pdbqt	ZINC000000901061	ZINC901061	-4.8	-4.8	-5.5	-5.03333	0.404145
fda_ligand_1060.pdbqt	ZINC000003812897	primogyn	-6.3	-6.3	-6.7	-6.43333	0.23094
fda_ligand_1061.pdbqt	ZINC000003875334	cortisone	-7.7	-7.8	-7.9	-7.8	0.1
fda_ligand_1062.pdbqt	ZINC000004228258	kuvan	-6.4	-6.5	-7.5	-6.8	0.608276
fda_ligand_1063.pdbqt	ZINC000004228258	kuvan	-6.6	-6.7	-7.9	-7.06667	0.723418
fda_ligand_1064.pdbqt	ZINC000004228258	kuvan	-6.4	-6.5	-7.5	-6.8	0.608276
fda_ligand_1065.pdbqt	ZINC000005029557	provera	-7.4	-7.5	-7.4	-7.43333	0.057735
fda_ligand_1066.pdbqt	ZINC000005133378	hydroquinone	-4.5	-4.6	-4.8	-4.63333	0.152753
fda_ligand_1067.pdbqt	ZINC000013540519	hydrocortisone	-7.3	-7.6	-7	-7.3	0.3
fda_ligand_1068.pdbqt	ZINC000000033882	dopamine	-6.1	-6	-6.1	-6.06667	0.057735
fda_ligand_1069.pdbqt	ZINC000000057522	ting	-6.1	-6.1	-6	-6.06667	0.057735
fda_ligand_1070.pdbqt	ZINC000000056427	eurax	-6.1	-6.2	-6	-6.1	0.1
fda_ligand_1071.pdbqt	ZINC000000057001	captopril	-5.5	-5.5	-5.4	-5.46667	0.057735
fda_ligand_1072.pdbqt	ZINC000000057254	chlophedianol	-5.5	-5.8	-6.4	-5.9	0.458258
fda_ligand_1073.pdbqt	ZINC000000057254	chlophedianol	-5.1	-5.2	-6.3	-5.53333	0.665833
fda_ligand_1074.pdbqt	ZINC000001886617	lescol	-6.2	-6.3	-6.4	-6.3	0.1
fda_ligand_1075.pdbqt	ZINC000000057340	robaxin	-6.4	-6.4	-7.8	-6.86667	0.80829
fda_ligand_1076.pdbqt	ZINC000000057464	ZINC57464	-6.9	-7	-7.1	-7	0.1
fda_ligand_1077.pdbqt	ZINC000000057464	ZINC57464	-7	-7.1	-6.8	-6.96667	0.152753
fda_ligand_1078.pdbqt	ZINC000000896463	carteolol	-6	-6.1	-6.5	-6.2	0.264575
fda_ligand_1079.pdbqt	ZINC000000896543	flecainide	-6.8	-6.7	-6.8	-6.76667	0.057735
fda_ligand_1080.pdbqt	ZINC000000896634	restoril	-6.5	-6.5	-8.9	-7.3	1.38564
fda_ligand_1081.pdbqt	ZINC000000896711	focalin	-5.6	-5.5	-6.5	-5.86667	0.550757
fda_ligand_1082.pdbqt	ZINC000000896819	sotalol	-5.4	-5.5	-7	-5.96667	0.896289
fda_ligand_1083.pdbqt	ZINC000000897002	ropivacaine	-5.9	-6.1	-6.5	-6.16667	0.305505
fda_ligand_1084.pdbqt	ZINC000000897002	ropivacaine	-6.2	-6.2	-6.5	-6.3	0.173205
fda_ligand_1085.pdbqt	ZINC000000897002	ropivacaine	-6	-6.1	-6.5	-6.2	0.264575
fda_ligand_1086.pdbqt	ZINC000003939013	fosaprepitant	-6.7	-6.9	-8.3	-7.3	0.87178
fda_ligand_1087.pdbqt	ZINC000001530579	coreg	-6.2	-6	-5.8	-6	0.2
fda_ligand_1088.pdbqt	ZINC000001530579	coreg	-6	-5.9	-5.4	-5.76667	0.321455
fda_ligand_1089.pdbqt	ZINC000001530580	coreg	-6.1	-5.8	-5.3	-5.73333	0.404145
fda_ligand_1090.pdbqt	ZINC000001530580	coreg	-6.7	-5.8	-6.1	-6.2	0.458258
fda_ligand_1091.pdbqt	ZINC000051951647	ZINC51951647	-5.5	-5.6	-5.8	-5.63333	0.152753
fda_ligand_1092.pdbqt	ZINC000164760756	olysio	-8	-7.8	-7.8	-7.86667	0.11547
fda_ligand_1093.pdbqt	ZINC000003873371	sulconazole	-6.6	-6.5	-7	-6.7	0.264575
fda_ligand_1094.pdbqt	ZINC000003873371	sulconazole	-6.6	-6.5	-7	-6.7	0.264575
fda_ligand_1095.pdbqt	ZINC000004097344	itc	-6.9	-7	-7	-6.96667	0.057735
fda_ligand_1096.pdbqt	ZINC000006627681	trimethoprim	-6.5	-6.7	-6.7	-6.63333	0.11547
fda_ligand_1097.pdbqt	ZINC000006627681	trimethoprim	-6.4	-6.7	-6.5	-6.53333	0.152753
fda_ligand_1098.pdbqt	ZINC000001530810	ultane	-4.9	-4.9	-4.9	-4.9	0
fda_ligand_1099.pdbqt	ZINC000001530637	fluoxetine	-5.8	-6.2	-6.2	-6.06667	0.23094
fda_ligand_1100.pdbqt	ZINC000000057146	ZINC57146	-6.6	-6.7	-6.9	-6.73333	0.152753
fda_ligand_1101.pdbqt	ZINC000000057147	ZINC57147	-6.3	-6.5	-7.1	-6.63333	0.416333
fda_ligand_1102.pdbqt	ZINC000000113382	chloramphenicol	-6.6	-6.6	-6.7	-6.63333	0.057735
fda_ligand_1103.pdbqt	ZINC000000113382	chloramphenicol	-6.2	-6.6	-6.6	-6.46667	0.23094
fda_ligand_1104.pdbqt	ZINC000001530776	eht0201	-6.4	-6.6	-6.5	-6.5	0.1
fda_ligand_1105.pdbqt	ZINC000003008621	valproic	-4.6	-4.8	-4.8	-4.73333	0.11547
fda_ligand_1106.pdbqt	ZINC000100036924	demeclocycline	-7.6	-8.1	-8.1	-7.93333	0.288675
fda_ligand_1107.pdbqt	ZINC000003814395	ZINC3814395	-6.3	-6.3	-6.6	-6.4	0.173205
fda_ligand_1108.pdbqt	ZINC000003830264	azt	-7.3	-7.4	-7.9	-7.53333	0.321455
fda_ligand_1109.pdbqt	ZINC000003831282	bicillin v2	-6.9	-6.6	-7	-6.83333	0.208167
fda_ligand_1110.pdbqt	ZINC000004102194	centany	-5.6	-6.5	-6.1	-6.06667	0.450925
fda_ligand_1111.pdbqt	ZINC000006920384	abreva	-4.5	-3.6	-4.2	-4.1	0.458258
fda_ligand_1112.pdbqt	ZINC000008214692	tobramycin	-6.1	-6.6	-6.3	-6.33333	0.251661
fda_ligand_1113.pdbqt	ZINC000013550868	acetaminophen	-6.1	-6.1	-5.8	-6	0.173205
fda_ligand_1114.pdbqt	ZINC000016929327	azadc	-6.5	-6.4	-8.3	-7.06667	1.06927
fda_ligand_1115.pdbqt	ZINC000019632614	iressa	-6.6	-6.6	-6.9	-6.7	0.173205
fda_ligand_1116.pdbqt	ZINC000019632614	iressa	-6.5	-6.7	-7	-6.73333	0.251661
fda_ligand_1117.pdbqt	ZINC000001530717	metoprolol	-5.8	-5.8	-5.9	-5.83333	0.057735
fda_ligand_1118.pdbqt	ZINC000001530741	nortriptyline	-6.4	-6.7	-6.8	-6.63333	0.208167
fda_ligand_1119.pdbqt	ZINC000001530761	propantheline	-6.7	-6.5	-6.9	-6.7	0.2
fda_ligand_1120.pdbqt	ZINC000001530922	fosphenytoin	-7.3	-7.1	-7.5	-7.3	0.2
fda_ligand_1121.pdbqt	ZINC000001530922	fosphenytoin	-7.5	-7.4	-7.5	-7.46667	0.057735
fda_ligand_1122.pdbqt	ZINC000001530922	fosphenytoin	-7.2	-7.3	-7.3	-7.26667	0.057735
fda_ligand_1123.pdbqt	ZINC000000000122	carbinoxamine	-5.2	-5.2	-6.6	-5.66667	0.80829
fda_ligand_1124.pdbqt	ZINC000000000122	carbinoxamine	-4.9	-4.8	-6.5	-5.4	0.953939
fda_ligand_1125.pdbqt	ZINC000002519740	fospropofol	-6.8	-6.9	-7.2	-6.96667	0.208167
fda_ligand_1126.pdbqt	ZINC000002519740	fospropofol	-6.7	-6.8	-7.2	-6.9	0.264575
fda_ligand_1127.pdbqt	ZINC000002519740	fospropofol	-6.8	-6.8	-7.1	-6.9	0.173205
fda_ligand_1128.pdbqt	ZINC000005456939	retin-a	-6.3	-6	-6.1	-6.13333	0.152753
fda_ligand_1129.pdbqt	ZINC000007997897	naftin	-4.9	-5	-4.9	-4.93333	0.057735
fda_ligand_1130.pdbqt	ZINC000007997897	naftin	-5.2	-5.2	-6.1	-5.5	0.519615
fda_ligand_1131.pdbqt	ZINC000007997897	naftin	-5.1	-5.3	-4.9	-5.1	0.2
fda_ligand_1132.pdbqt	ZINC000008214651	definity	-4.7	-4.7	-4.9	-4.76667	0.11547
fda_ligand_1133.pdbqt	ZINC000011616882	ZINC11616882	-7.6	-7.9	-7.6	-7.7	0.173205
fda_ligand_1134.pdbqt	ZINC000001530689	tamoxifen	-5.5	-5.5	-5.8	-5.6	0.173205
fda_ligand_1135.pdbqt	ZINC000001530689	tamoxifen	-5.3	-5.5	-5.7	-5.5	0.2
fda_ligand_1136.pdbqt	ZINC000000001798	nicotrol	-5.2	-5.2	-6	-5.46667	0.46188
fda_ligand_1137.pdbqt	ZINC000000001798	nicotrol	-5	-5.2	-6.1	-5.43333	0.585947
fda_ligand_1138.pdbqt	ZINC000000001798	nicotrol	-5.2	-5.3	-5.9	-5.46667	0.378594
fda_ligand_1139.pdbqt	ZINC000001530617	disopyramide	-5.6	-5.7	-6.3	-5.86667	0.378594
fda_ligand_1140.pdbqt	ZINC000001530567	betaxolol	-5.5	-5.7	-5.4	-5.53333	0.152753
fda_ligand_1141.pdbqt	ZINC000001530568	betaxolol	-5.5	-5.7	-5.2	-5.46667	0.251661
fda_ligand_1142.pdbqt	ZINC000001530569	bisoprolol	-5.9	-5.2	-5.2	-5.43333	0.404145
fda_ligand_1143.pdbqt	ZINC000001530570	bisoprolol	-5.4	-5.3	-5.6	-5.43333	0.152753
fda_ligand_1144.pdbqt	ZINC000001530600	cidofovir	-7.3	-7.4	-7.8	-7.5	0.264575
fda_ligand_1145.pdbqt	ZINC000001530600	cidofovir	-7.5	-8.2	-7.5	-7.73333	0.404145
fda_ligand_1146.pdbqt	ZINC000001530600	cidofovir	-7.1	-7	-7.3	-7.13333	0.152753
fda_ligand_1147.pdbqt	ZINC000000000850	zyflo	-5.7	-5.9	-7.7	-6.43333	1.10151
fda_ligand_1148.pdbqt	ZINC000000000850	zyflo	-5.9	-6.1	-7.6	-6.53333	0.929157
fda_ligand_1149.pdbqt	ZINC000000000853	tramadol	-6.2	-6.3	-6.3	-6.26667	0.057735
fda_ligand_1150.pdbqt	ZINC000000001688	asacol	-5.9	-5.9	-6.1	-5.96667	0.11547
fda_ligand_1151.pdbqt	ZINC000000001688	asacol	-6.1	-6.1	-6.2	-6.13333	0.057735
fda_ligand_1152.pdbqt	ZINC000000001728	metyrapone	-6.6	-6.7	-7.3	-6.86667	0.378594
fda_ligand_1153.pdbqt	ZINC000000000856	formoterol	-6.5	-6.6	-7.3	-6.8	0.43589
fda_ligand_1154.pdbqt	ZINC000000000856	formoterol	-6.3	-5.5	-5.6	-5.8	0.43589
fda_ligand_1155.pdbqt	ZINC000000000905	hmm	-4.2	-4.4	-5.6	-4.73333	0.757188
fda_ligand_1156.pdbqt	ZINC000000000905	hmm	-4.6	-4.7	-5.9	-5.06667	0.723418
fda_ligand_1157.pdbqt	ZINC000000003642	lodine	-6.2	-6.2	-6.4	-6.26667	0.11547
fda_ligand_1158.pdbqt	ZINC000000039089	epinephrine	-6.3	-6.4	-6.4	-6.36667	0.057735
fda_ligand_1159.pdbqt	ZINC000022016976	calteridol	-5.5	-5.6	-5.7	-5.6	0.1
fda_ligand_1160.pdbqt	ZINC000022016976	calteridol	-5.7	-6.3	-6.8	-6.26667	0.550757
fda_ligand_1161.pdbqt	ZINC000022016976	calteridol	-5.4	-5.9	-6.5	-5.93333	0.550757
fda_ligand_1162.pdbqt	ZINC000022016981	calteridol	-5.7	-6.2	-6	-5.96667	0.251661
fda_ligand_1163.pdbqt	ZINC000022016981	calteridol	-6	-6.3	-6.6	-6.3	0.3
fda_ligand_1164.pdbqt	ZINC000022016981	calteridol	-5.8	-6.3	-6.5	-6.2	0.360555
fda_ligand_1165.pdbqt	ZINC000022059268	tetraxetan	-5.7	-5.8	-5.9	-5.8	0.1
fda_ligand_1166.pdbqt	ZINC000022059930	gemifloxacin	-6.5	-6.7	-6.1	-6.43333	0.305505
fda_ligand_1167.pdbqt	ZINC000022116612	fenoldopam	-7.1	-7	-7.9	-7.33333	0.493288
fda_ligand_1168.pdbqt	ZINC000022116612	fenoldopam	-7.3	-7.2	-8.1	-7.53333	0.493288
fda_ligand_1169.pdbqt	ZINC000000896717	accolate	-7.3	-7.1	-7.4	-7.26667	0.152753
fda_ligand_1170.pdbqt	ZINC000000896918	daranide	-7.4	-6.7	-8.2	-7.43333	0.750555
fda_ligand_1171.pdbqt	ZINC000000897085	mefloquine	-6.8	-6.8	-7.4	-7	0.34641
fda_ligand_1172.pdbqt	ZINC000000968263	cyclobenzaprine	-5.9	-6.3	-6.2	-6.13333	0.208167
fda_ligand_1173.pdbqt	ZINC000000968330	rosiglitazone	-6.7	-6.5	-6.5	-6.56667	0.11547
fda_ligand_1174.pdbqt	ZINC000000968330	rosiglitazone	-5.7	-5.8	-5.9	-5.8	0.1
fda_ligand_1175.pdbqt	ZINC000000402830	clemastine	-5.4	-5.6	-5.6	-5.53333	0.11547
fda_ligand_1176.pdbqt	ZINC000000402830	clemastine	-5.6	-5.6	-6.3	-5.83333	0.404145
fda_ligand_1177.pdbqt	ZINC000000403533	oxycodone	-6.5	-7.1	-7.1	-6.9	0.34641
fda_ligand_1178.pdbqt	ZINC000000403533	oxycodone	-7.1	-6.9	-7	-7	0.1
fda_ligand_1179.pdbqt	ZINC000000403533	oxycodone	-6.7	-6.7	-7.2	-6.86667	0.288675
fda_ligand_1180.pdbqt	ZINC000000403609	betimol	-5.5	-5.4	-6.1	-5.66667	0.378594
fda_ligand_1181.pdbqt	ZINC000000005878	nam	-5.6	-5.6	-5.5	-5.56667	0.057735
fda_ligand_1182.pdbqt	ZINC000000394284	tussin	-6.5	-6.3	-6.7	-6.5	0.2
fda_ligand_1183.pdbqt	ZINC000000000693	demser	-6.1	-6.1	-6.4	-6.2	0.173205
fda_ligand_1184.pdbqt	ZINC000053683345	caprelsa	-6.5	-6.4	-6.4	-6.43333	0.057735
fda_ligand_1185.pdbqt	ZINC000049643479	oxaprozin	-6.8	-6.8	-6.6	-6.73333	0.11547
fda_ligand_1186.pdbqt	ZINC000052716421	flibanserin	-6.7	-6.8	-7.1	-6.86667	0.208167
fda_ligand_1187.pdbqt	ZINC000052716421	flibanserin	-6.7	-6.8	-6.8	-6.76667	0.057735
fda_ligand_1188.pdbqt	ZINC000052971887	eflornithine	-5.6	-5.4	-5.4	-5.46667	0.11547
fda_ligand_1189.pdbqt	ZINC000052971887	eflornithine	-5.3	-5.1	-5.3	-5.23333	0.11547
fda_ligand_1190.pdbqt	ZINC000053683151	bromocriptine	-7.7	-7.8	-8.3	-7.93333	0.321455
fda_ligand_1191.pdbqt	ZINC000053683151	bromocriptine	-7.7	-7.9	-8.4	-8	0.360555
fda_ligand_1192.pdbqt	ZINC000053683151	bromocriptine	-6.9	-7.8	-7.6	-7.43333	0.472582
fda_ligand_1193.pdbqt	ZINC000034781704	clopidogrel	-5.8	-6	-6.3	-6.03333	0.251661
fda_ligand_1194.pdbqt	ZINC000095619105	methylergonovine	-6.4	-6.8	-6.8	-6.66667	0.23094
fda_ligand_1195.pdbqt	ZINC000095619105	methylergonovine	-6.6	-6.4	-6.8	-6.6	0.2
fda_ligand_1196.pdbqt	ZINC000095619105	methylergonovine	-6.6	-6.4	-6.8	-6.6	0.2
fda_ligand_1197.pdbqt	ZINC000006661227	histidine	-5.5	-5.5	-5.8	-5.6	0.173205
fda_ligand_1198.pdbqt	ZINC000006661227	histidine	-5.9	-6	-6.1	-6	0.1
fda_ligand_1199.pdbqt	ZINC000006661227	histidine	-5.7	-5.7	-5.9	-5.76667	0.11547
fda_ligand_1200.pdbqt	ZINC000058581064	dolutegravir	-7.8	-7.9	-8.3	-8	0.264575
fda_ligand_1201.pdbqt	ZINC000060325170	cobimetinib	-7.1	-7.2	-7.3	-7.2	0.1
fda_ligand_1202.pdbqt	ZINC000064033452	lumacaftor	-8.2	-8.6	-8.5	-8.43333	0.208167
fda_ligand_1203.pdbqt	ZINC000049036447	suvorexant	-7.5	-7.3	-7.9	-7.56667	0.305505
fda_ligand_1204.pdbqt	ZINC000049841054	kyprolis	-6.3	-5.6	-5.3	-5.73333	0.51316
fda_ligand_1205.pdbqt	ZINC000052509463	vx-770	-6.4	-6.3	-6.2	-6.3	0.1
fda_ligand_1206.pdbqt	ZINC000052509463	vx-770	-6.5	-6.5	-6.3	-6.43333	0.11547
fda_ligand_1207.pdbqt	ZINC000052509463	vx-770	-6.5	-6.6	-6.4	-6.5	0.1
fda_ligand_1208.pdbqt	ZINC000052957434	zyprexa	-6.1	-6	-6.4	-6.16667	0.208167
fda_ligand_1209.pdbqt	ZINC000052957434	zyprexa	-6.1	-6	-6.2	-6.1	0.1
fda_ligand_1210.pdbqt	ZINC000053022902	eflornithine	-5.4	-5.3	-5.3	-5.33333	0.057735
fda_ligand_1211.pdbqt	ZINC000053022902	eflornithine	-5.4	-5.3	-5.3	-5.33333	0.057735
fda_ligand_1212.pdbqt	ZINC000052509366	zelboraf	-7.1	-7.2	-8.1	-7.46667	0.550757
fda_ligand_1213.pdbqt	ZINC000052509366	zelboraf	-7.2	-7.6	-7.2	-7.33333	0.23094
fda_ligand_1214.pdbqt	ZINC000004074875	candesartan	-7.7	-8.1	-6.7	-7.5	0.72111
fda_ligand_1215.pdbqt	ZINC000004074875	candesartan	-7.7	-7.6	-7.7	-7.66667	0.057735
fda_ligand_1216.pdbqt	ZINC000004097427	candesartan	-7.7	-7.4	-8	-7.7	0.3
fda_ligand_1217.pdbqt	ZINC000004097427	candesartan	-7.4	-7.5	-7.9	-7.6	0.264575
fda_ligand_1218.pdbqt	ZINC000004693574	omeprazole	-6.6	-6.7	-6.6	-6.63333	0.057735
fda_ligand_1219.pdbqt	ZINC000004693574	omeprazole	-6	-6	-6.5	-6.16667	0.288675
fda_ligand_1220.pdbqt	ZINC000000000655	biltricide	-6.6	-6.7	-6.4	-6.56667	0.152753
fda_ligand_1221.pdbqt	ZINC000000000456	mepivacaine	-5.5	-5.5	-6	-5.66667	0.288675
fda_ligand_1222.pdbqt	ZINC000000000456	mepivacaine	-5.8	-5.7	-6	-5.83333	0.152753
fda_ligand_1223.pdbqt	ZINC000000000456	mepivacaine	-5.5	-5.4	-6	-5.63333	0.321455
fda_ligand_1224.pdbqt	ZINC000034051848	vortioxetine	-5.9	-6.3	-7	-6.4	0.556776
fda_ligand_1225.pdbqt	ZINC000034051848	vortioxetine	-6	-6.3	-7.1	-6.46667	0.568624
fda_ligand_1226.pdbqt	ZINC000000601316	clidinium	-6.1	-6.9	-7	-6.66667	0.493288
fda_ligand_1227.pdbqt	ZINC000000606383	sertaconazole	-5.9	-5.8	-7.6	-6.43333	1.0116
fda_ligand_1228.pdbqt	ZINC000000606383	sertaconazole	-6	-6	-7.9	-6.63333	1.09697
fda_ligand_1229.pdbqt	ZINC000000608101	vagistat-1	-5.6	-5.6	-7.1	-6.1	0.866025
fda_ligand_1230.pdbqt	ZINC000000608101	vagistat-1	-5.8	-6.5	-7.4	-6.56667	0.802081
fda_ligand_1231.pdbqt	ZINC000004474682	travoprost	-6	-5.5	-5.9	-5.8	0.264575
fda_ligand_1232.pdbqt	ZINC000004577910	pralidoxime	-5.9	-5.7	-5.9	-5.83333	0.11547
fda_ligand_1233.pdbqt	ZINC000004632106	medetomidine	-6.2	-6.2	-6	-6.13333	0.11547
fda_ligand_1234.pdbqt	ZINC000004632106	medetomidine	-6.4	-6.4	-6.5	-6.43333	0.057735
fda_ligand_1235.pdbqt	ZINC000006733300	lorcaserin	-5.3	-5.5	-6.5	-5.76667	0.64291
fda_ligand_1236.pdbqt	ZINC000003978005	dihydroergotamine	-8.2	-8.6	-8.4	-8.4	0.2
fda_ligand_1237.pdbqt	ZINC000003978005	dihydroergotamine	-8.3	-8.5	-8.4	-8.4	0.1
fda_ligand_1238.pdbqt	ZINC000003978005	dihydroergotamine	-8	-8.5	-8.4	-8.3	0.264575
fda_ligand_1239.pdbqt	ZINC000003990451	selexipag	-5.8	-6.2	-6.3	-6.1	0.264575
fda_ligand_1240.pdbqt	ZINC000003995809	faslodex	-5.4	-5.4	-5.7	-5.5	0.173205
fda_ligand_1241.pdbqt	ZINC000086040406	hexamine	-4.5	-4.5	-4.5	-4.5	0
fda_ligand_1242.pdbqt	ZINC000100009278	atropine	-6.2	-6.2	-6.2	-6.2	0
fda_ligand_1243.pdbqt	ZINC000100009278	atropine	-5.9	-6	-6.5	-6.13333	0.321455
fda_ligand_1244.pdbqt	ZINC000100009280	hyoscyamine	-6	-6	-6.4	-6.13333	0.23094
fda_ligand_1245.pdbqt	ZINC000100009280	hyoscyamine	-5.9	-5.9	-6.4	-6.06667	0.288675
fda_ligand_1246.pdbqt	ZINC000003830215	amoxicillin	-6.7	-6.7	-7.3	-6.9	0.34641
fda_ligand_1247.pdbqt	ZINC000003830215	amoxicillin	-6.7	-6.7	-7.3	-6.9	0.34641
fda_ligand_1248.pdbqt	ZINC000005133329	iph	-4.2	-4.2	-4.3	-4.23333	0.057735
fda_ligand_1249.pdbqt	ZINC000118912393	testosterone	-6.8	-6.7	-7	-6.83333	0.152753
fda_ligand_1250.pdbqt	ZINC000003079337	choline	-4.1	-4	-4.2	-4.1	0.1
fda_ligand_1251.pdbqt	ZINC000003581355	ile	-4.5	-4.5	-4.7	-4.56667	0.11547
fda_ligand_1252.pdbqt	ZINC000003645145	leu	-4.8	-4.9	-4.9	-4.86667	0.057735
fda_ligand_1253.pdbqt	ZINC000035024346	ZINC35024346	-6.8	-7.1	-7	-6.96667	0.152753
fda_ligand_1254.pdbqt	ZINC000000000490	ZINC490	-5.9	-5.9	-5.7	-5.83333	0.11547
fda_ligand_1255.pdbqt	ZINC000000001706	nikomet	-5.5	-5.6	-5.3	-5.46667	0.152753
fda_ligand_1256.pdbqt	ZINC000000002028	resorcin	-4.8	-4.8	-4.8	-4.8	0
fda_ligand_1257.pdbqt	ZINC000000156395	acetyl tyrosine	-6.4	-6.4	-6.8	-6.53333	0.23094
fda_ligand_1258.pdbqt	ZINC000000896409	triethanolamine	-5	-5.2	-5.3	-5.16667	0.152753
fda_ligand_1259.pdbqt	ZINC000000896409	triethanolamine	-5.1	-5.1	-5.3	-5.16667	0.11547
fda_ligand_1260.pdbqt	ZINC000001576892	oxana	-5.1	-5.1	-6.1	-5.43333	0.57735
fda_ligand_1261.pdbqt	ZINC000002561203	butyl vanillyl ether	-4.8	-5.2	-5.7	-5.23333	0.450925
fda_ligand_1262.pdbqt	ZINC000004474564	cervonate	-4.2	-5.2	-5	-4.8	0.52915
fda_ligand_1263.pdbqt	ZINC000004474603	epa	-5.3	-5.5	-4.9	-5.23333	0.305505
fda_ligand_1264.pdbqt	ZINC000008214514	urea	-4.3	-4.2	-4.1	-4.2	0.1
fda_ligand_1265.pdbqt	ZINC000012503177	caverject	-6	-5.9	-6.1	-6	0.1
fda_ligand_1266.pdbqt	ZINC000005733652	diosmetin	-6.9	-6.9	-7.7	-7.16667	0.46188
fda_ligand_1267.pdbqt	ZINC000005733652	diosmetin	-6.8	-6.8	-7.9	-7.16667	0.635085
fda_ligand_1268.pdbqt	ZINC000005733652	diosmetin	-6.9	-6.8	-7.9	-7.2	0.608276
fda_ligand_1269.pdbqt	ZINC000005733652	diosmetin	-6.9	-6.9	-7.7	-7.16667	0.46188
fda_ligand_1270.pdbqt	ZINC000012495062	pgx	-6.1	-6.2	-5.7	-6	0.264575
fda_ligand_1271.pdbqt	ZINC000000056645	pindolol	-5.7	-6.2	-6.2	-6.03333	0.288675
fda_ligand_1272.pdbqt	ZINC000000056647	promethazine	-5.6	-5.6	-5.8	-5.66667	0.11547
fda_ligand_1273.pdbqt	ZINC000000057253	chlophedianol	-5.6	-5.8	-6	-5.8	0.2
fda_ligand_1274.pdbqt	ZINC000000057253	chlophedianol	-5.3	-5.5	-6.2	-5.66667	0.472582
fda_ligand_1275.pdbqt	ZINC000000057313	lodine	-6.7	-6.5	-6.4	-6.53333	0.152753
fda_ligand_1276.pdbqt	ZINC000001995484	valganciclovir	-6.5	-6.8	-7.9	-7.06667	0.737111
fda_ligand_1277.pdbqt	ZINC000001995484	valganciclovir	-6.7	-6.8	-7	-6.83333	0.152753
fda_ligand_1278.pdbqt	ZINC000003977777	cyclocort	-7.9	-8.1	-8.2	-8.06667	0.152753
fda_ligand_1279.pdbqt	ZINC000003985982	inspra	-8	-8.4	-7.8	-8.06667	0.305505
fda_ligand_1280.pdbqt	ZINC000003993855	cialis	-7.8	-7.8	-7.6	-7.73333	0.11547
fda_ligand_1281.pdbqt	ZINC000100014909	nintedanib	-7.5	-7.4	-7.5	-7.46667	0.057735
fda_ligand_1282.pdbqt	ZINC000100014909	nintedanib	-7.5	-7.4	-7.5	-7.46667	0.057735
fda_ligand_1283.pdbqt	ZINC000100015775	ipratropium	-6.1	-5.8	-6.2	-6.03333	0.208167
fda_ligand_1284.pdbqt	ZINC000100015780	ipratropium	-5.9	-5.6	-6.6	-6.03333	0.51316
fda_ligand_1285.pdbqt	ZINC000029319828	eprosartan	-6	-6	-6.6	-6.2	0.34641
fda_ligand_1286.pdbqt	ZINC000029319828	eprosartan	-5.6	-6	-6.2	-5.93333	0.305505
fda_ligand_1287.pdbqt	ZINC000100001964	amlodipine	-6.1	-6.6	-6.6	-6.43333	0.288675
fda_ligand_1288.pdbqt	ZINC000087515509	dexrazoxane	-7.5	-7.5	-7.7	-7.56667	0.11547
fda_ligand_1289.pdbqt	ZINC000095616599	terazosin	-6.3	-6.3	-6.3	-6.3	0
fda_ligand_1290.pdbqt	ZINC000095616599	terazosin	-6.4	-6.3	-6.3	-6.33333	0.057735
fda_ligand_1291.pdbqt	ZINC000096006009	sulfisoxazole	-6.5	-6.8	-7.3	-6.86667	0.404145
fda_ligand_1292.pdbqt	ZINC000096006009	sulfisoxazole	-6.7	-6.8	-7.4	-6.96667	0.378594
fda_ligand_1293.pdbqt	ZINC000100022637	tpv	-7.3	-7.2	-7.6	-7.36667	0.208167
fda_ligand_1294.pdbqt	ZINC000100022637	tpv	-7.3	-7.3	-7.8	-7.46667	0.288675
fda_ligand_1295.pdbqt	ZINC000100032379	tipiracil	-6.9	-6.9	-6.9	-6.9	0
fda_ligand_1296.pdbqt	ZINC000100032379	tipiracil	-6.9	-6.8	-7.1	-6.93333	0.152753
fda_ligand_1297.pdbqt	ZINC000100036536	benztropine	-5.6	-5.6	-5.8	-5.66667	0.11547
fda_ligand_1298.pdbqt	ZINC000100036536	benztropine	-5.7	-5.9	-6.3	-5.96667	0.305505
fda_ligand_1299.pdbqt	ZINC000000009689	starlix	-6.1	-6.2	-6.7	-6.33333	0.321455
fda_ligand_1300.pdbqt	ZINC000005819214	rapivab	-7.1	-7.3	-7.5	-7.3	0.2
fda_ligand_1301.pdbqt	ZINC000100074252	sofosbuvir	-6.7	-6.7	-7.4	-6.93333	0.404145
fda_ligand_1302.pdbqt	ZINC000027428713	emend	-7	-7.6	-8.2	-7.6	0.6
fda_ligand_1303.pdbqt	ZINC000027428713	emend	-6.9	-7.4	-8.2	-7.5	0.655744
fda_ligand_1304.pdbqt	ZINC000094566093	doxazosin	-6.9	-6.8	-6.5	-6.73333	0.208167
fda_ligand_1305.pdbqt	ZINC000094566093	doxazosin	-6.7	-6.7	-6.3	-6.56667	0.23094
fda_ligand_1306.pdbqt	ZINC000095619101	ranolazine	-6.5	-6.6	-6.5	-6.53333	0.057735
fda_ligand_1307.pdbqt	ZINC000095619101	ranolazine	-6.5	-6.7	-6.3	-6.5	0.2
fda_ligand_1308.pdbqt	ZINC000096942202	felodipine	-6.1	-6	-6.4	-6.16667	0.208167
fda_ligand_1309.pdbqt	ZINC000003830716	diphenoxylate	-5.9	-6.3	-7	-6.4	0.556776
fda_ligand_1310.pdbqt	ZINC000003830716	diphenoxylate	-5.7	-6.2	-7	-6.3	0.655744
fda_ligand_1311.pdbqt	ZINC000005844792	nebivolol	-6.2	-7	-7.8	-7	0.8
fda_ligand_1312.pdbqt	ZINC000005844792	nebivolol	-5.9	-5.8	-7.8	-6.5	1.12694
fda_ligand_1313.pdbqt	ZINC000100019007	dtic	-5.8	-6.1	-6.2	-6.03333	0.208167
fda_ligand_1314.pdbqt	ZINC000100055899	tenofovir alafenamide	-6.7	-6.3	-7.3	-6.76667	0.503322
fda_ligand_1315.pdbqt	ZINC000118912517	fml	-7.1	-7	-7.3	-7.13333	0.152753
fda_ligand_1316.pdbqt	ZINC000094566092	doxazosin	-6.9	-6.8	-7.1	-6.93333	0.152753
fda_ligand_1317.pdbqt	ZINC000094566092	doxazosin	-6.7	-6.7	-6.9	-6.76667	0.11547
fda_ligand_1318.pdbqt	ZINC000095626706	midazolam	-6.3	-6.6	-6.4	-6.43333	0.152753
fda_ligand_1319.pdbqt	ZINC000095626706	midazolam	-6.5	-6.4	-6.4	-6.43333	0.057735
fda_ligand_1320.pdbqt	ZINC000100001918	isradipin	-6.9	-7	-7.4	-7.1	0.264575
fda_ligand_1321.pdbqt	ZINC000027990463	lomitapide	-8	-8.1	-7.3	-7.8	0.43589
fda_ligand_1322.pdbqt	ZINC000100004343	coartem	-6.1	-6	-5.2	-5.76667	0.493288
fda_ligand_1323.pdbqt	ZINC000100004345	coartem	-6.1	-6.5	-6.2	-6.26667	0.208167
fda_ligand_1324.pdbqt	ZINC000095452610	chloroguanide	-6.3	-6.3	-6.1	-6.23333	0.11547
fda_ligand_1325.pdbqt	ZINC000095452610	chloroguanide	-6.3	-6.3	-6.2	-6.26667	0.057735
fda_ligand_1326.pdbqt	ZINC000095616600	terazosin	-6.4	-6.3	-6.5	-6.4	0.1
fda_ligand_1327.pdbqt	ZINC000095616600	terazosin	-6.4	-6.3	-6.8	-6.5	0.264575
fda_ligand_1328.pdbqt	ZINC000095619100	ranolazine	-6.8	-7	-6.9	-6.9	0.1
fda_ligand_1329.pdbqt	ZINC000095619100	ranolazine	-6.9	-6.6	-6.8	-6.76667	0.152753
fda_ligand_1330.pdbqt	ZINC000096942201	felodipine	-6.7	-6.9	-6.4	-6.66667	0.251661
fda_ligand_1331.pdbqt	ZINC000100001965	amlodipine	-6.6	-6.4	-5.6	-6.2	0.52915
fda_ligand_1332.pdbqt	ZINC000005764759	methylnaltrexone	-6.8	-7	-7.1	-6.96667	0.152753
fda_ligand_1333.pdbqt	ZINC000028957444	brilinta	-7.3	-7.7	-7.1	-7.36667	0.305505
fda_ligand_1334.pdbqt	ZINC000030690433	thiothixene	-6.9	-6.7	-6.6	-6.73333	0.152753
fda_ligand_1335.pdbqt	ZINC000030690433	thiothixene	-6.8	-6.6	-6.7	-6.7	0.1
fda_ligand_1336.pdbqt	ZINC000030690433	thiothixene	-6.9	-6.7	-6.4	-6.66667	0.251661
fda_ligand_1337.pdbqt	ZINC000019364225	trientine	-5	-5	-5.2	-5.06667	0.11547
fda_ligand_1338.pdbqt	ZINC000019364225	trientine	-5	-4.9	-5.1	-5	0.1
fda_ligand_1339.pdbqt	ZINC000013520815	alora	-7	-6.6	-6.9	-6.83333	0.208167
fda_ligand_1340.pdbqt	ZINC000030691763	cleviprex	-6.3	-6.1	-6.4	-6.26667	0.152753
fda_ligand_1341.pdbqt	ZINC000030691727	aclidinium	-5.7	-6.2	-6.8	-6.23333	0.550757
fda_ligand_1342.pdbqt	ZINC000030691736	apremilast	-6.9	-7	-6.6	-6.83333	0.208167
fda_ligand_1343.pdbqt	ZINC000030691760	cleviprex	-6.3	-6.2	-7	-6.5	0.43589
fda_ligand_1344.pdbqt	ZINC000019363537	tetraethylenepentamine	-5.1	-5.1	-5.4	-5.2	0.173205
fda_ligand_1345.pdbqt	ZINC000019363537	tetraethylenepentamine	-5.3	-5.7	-5.3	-5.43333	0.23094
fda_ligand_1346.pdbqt	ZINC000000897089	mefloquine	-7.4	-7.6	-7.4	-7.46667	0.11547
fda_ligand_1347.pdbqt	ZINC000008101126	guanidine	-4.1	-3.9	-3.8	-3.93333	0.152753
fda_ligand_1348.pdbqt	ZINC000008220909	ZINC8220909	-7.4	-7.6	-6.7	-7.23333	0.472582
fda_ligand_1349.pdbqt	ZINC000008855117	hxr	-7.2	-7.2	-8.4	-7.6	0.69282
fda_ligand_1350.pdbqt	ZINC000008855117	hxr	-7.2	-7.2	-8.2	-7.53333	0.57735
fda_ligand_1351.pdbqt	ZINC000009212427	leucal	-7.6	-8.2	-7.7	-7.83333	0.321455
fda_ligand_1352.pdbqt	ZINC000009212427	leucal	-8.2	-8.7	-8.2	-8.36667	0.288675
fda_ligand_1353.pdbqt	ZINC000009212427	leucal	-8	-8.6	-8	-8.2	0.34641
fda_ligand_1354.pdbqt	ZINC000000896569	hydrochlorothiazide	-6.5	-6.5	-6.7	-6.56667	0.11547
fda_ligand_1355.pdbqt	ZINC000000896703	celontin	-5.5	-5.7	-7.6	-6.26667	1.15902
fda_ligand_1356.pdbqt	ZINC000000896731	zyflo	-5.9	-5.9	-7.4	-6.4	0.866025
fda_ligand_1357.pdbqt	ZINC000000896731	zyflo	-5.9	-6.1	-7.4	-6.46667	0.814453
fda_ligand_1358.pdbqt	ZINC000000896958	cuvposa	-5.8	-5.8	-6	-5.86667	0.11547
fda_ligand_1359.pdbqt	ZINC000008034121	cysteamine	-3	-3	-2.9	-2.96667	0.057735
fda_ligand_1360.pdbqt	ZINC000000968336	tolterodine	-5.8	-5.7	-5.7	-5.73333	0.057735
fda_ligand_1361.pdbqt	ZINC000000004724	trileptal	-7.5	-7.9	-7.3	-7.56667	0.305505
fda_ligand_1362.pdbqt	ZINC000000001148	doxepin	-6	-6.1	-6.4	-6.16667	0.208167
fda_ligand_1363.pdbqt	ZINC000000897240	azelastine	-6.7	-6.8	-6.2	-6.56667	0.321455
fda_ligand_1364.pdbqt	ZINC000000897240	azelastine	-7.1	-7	-6.4	-6.83333	0.378594
fda_ligand_1365.pdbqt	ZINC000000897240	azelastine	-7.1	-6.9	-6.4	-6.8	0.360555
fda_ligand_1366.pdbqt	ZINC000222731806	ZINC222731806	-7.3	-7.3	-7.2	-7.26667	0.057735
fda_ligand_1367.pdbqt	ZINC000034220093	flutemetamol	-6.3	-6.2	-7.2	-6.56667	0.550757
fda_ligand_1368.pdbqt	ZINC000000538483	trazodone	-6.1	-6.4	-6.6	-6.36667	0.251661
fda_ligand_1369.pdbqt	ZINC000000538483	trazodone	-7	-6.9	-6.5	-6.8	0.264575
fda_ligand_1370.pdbqt	ZINC000000537791	amaryl	-7.4	-7.3	-7.4	-7.36667	0.057735
fda_ligand_1371.pdbqt	ZINC000000537791	amaryl	-6.8	-6.8	-6.9	-6.83333	0.057735
fda_ligand_1372.pdbqt	ZINC000000537791	amaryl	-7.5	-7.4	-7.7	-7.53333	0.152753
fda_ligand_1373.pdbqt	ZINC000000537791	amaryl	-7.4	-7.2	-7.5	-7.36667	0.152753
fda_ligand_1374.pdbqt	ZINC000000537891	ofloxacin	-6.8	-6.8	-8	-7.2	0.69282
fda_ligand_1375.pdbqt	ZINC000000537891	ofloxacin	-6.8	-6.8	-8.3	-7.3	0.866025
fda_ligand_1376.pdbqt	ZINC000000537931	loratadine	-7	-6.9	-7.1	-7	0.1
fda_ligand_1377.pdbqt	ZINC000095616603	topamax	-7.6	-8	-7.9	-7.83333	0.208167
fda_ligand_1378.pdbqt	ZINC000100007011	lysteda	-5.7	-5.8	-5.5	-5.66667	0.152753
fda_ligand_1379.pdbqt	ZINC000000895360	proline	-4.9	-4.9	-5.2	-5	0.173205
fda_ligand_1380.pdbqt	ZINC000000895034	l-ser	-4	-4.3	-4.6	-4.3	0.3
fda_ligand_1381.pdbqt	ZINC000000895034	l-ser	-4.2	-4.2	-4.9	-4.43333	0.404145
fda_ligand_1382.pdbqt	ZINC000000895032	aspartate	-4.8	-5.5	-5.1	-5.13333	0.351188
fda_ligand_1383.pdbqt	ZINC000004428529	gesterol	-7.2	-6.9	-7.3	-7.13333	0.208167
fda_ligand_1384.pdbqt	ZINC000002539827	kuvan	-7.3	-7.2	-7.5	-7.33333	0.152753
fda_ligand_1385.pdbqt	ZINC000002539827	kuvan	-7.7	-7.6	-7.4	-7.56667	0.152753
fda_ligand_1386.pdbqt	ZINC000002539827	kuvan	-7.4	-7.2	-7.6	-7.4	0.2
fda_ligand_1387.pdbqt	ZINC000003874715	wartec	-7.6	-7.7	-7.4	-7.56667	0.152753
fda_ligand_1388.pdbqt	ZINC000003782550	kerastick	-5.1	-5.2	-5.2	-5.16667	0.057735
fda_ligand_1389.pdbqt	ZINC000003782550	kerastick	-5.6	-5.4	-5.4	-5.46667	0.11547
fda_ligand_1390.pdbqt	ZINC000003830713	pge2	-6.2	-6.2	-6.2	-6.2	0
fda_ligand_1391.pdbqt	ZINC000003876186	enjuvia	-6.7	-6.7	-8.2	-7.2	0.866025
fda_ligand_1392.pdbqt	ZINC000003914809	urso	-7.1	-7.3	-6.8	-7.06667	0.251661
fda_ligand_1393.pdbqt	ZINC000003875560	methylprednisolone	-7.4	-7.9	-7.1	-7.46667	0.404145
fda_ligand_1394.pdbqt	ZINC000001530283	carbaglu	-6.6	-6.6	-6.5	-6.56667	0.057735
fda_ligand_1395.pdbqt	ZINC000003920355	ZINC3920355	-6.3	-6	-6.2	-6.16667	0.152753
fda_ligand_1396.pdbqt	ZINC000003871967	cedax	-7.1	-7.2	-8.6	-7.63333	0.83865
fda_ligand_1397.pdbqt	ZINC000003872520	trecator	-5.2	-5.4	-5.7	-5.43333	0.251661
fda_ligand_1398.pdbqt	ZINC000003871923	cefepime	-6.9	-7.3	-7.6	-7.26667	0.351188
fda_ligand_1399.pdbqt	ZINC000003872055	chlorothiazide	-6.3	-6.3	-6.5	-6.36667	0.11547
fda_ligand_1400.pdbqt	ZINC000003830947	isovue-m	-4.9	-4.9	-4.9	-4.9	0
fda_ligand_1401.pdbqt	ZINC000002169830	myocol	-6.7	-6.7	-8.2	-7.2	0.866025
fda_ligand_1402.pdbqt	ZINC000004978673	stearate	-4.2	-3.8	-4.6	-4.2	0.4
fda_ligand_1403.pdbqt	ZINC000006827693	carbonate	-4.2	-4.3	-4	-4.16667	0.152753
fda_ligand_1404.pdbqt	ZINC000006827693	carbonate	-4.3	-4.3	-4.2	-4.26667	0.057735
fda_ligand_1405.pdbqt	ZINC000006845860	oleate	-5	-4.1	-4.3	-4.46667	0.472582
fda_ligand_1406.pdbqt	ZINC000006858022	cholic acid	-7	-6.8	-7.4	-7.06667	0.305505
fda_ligand_1407.pdbqt	ZINC000000895154	kuvan	-7.1	-7	-7.3	-7.13333	0.152753
fda_ligand_1408.pdbqt	ZINC000000895154	kuvan	-7.3	-7.5	-8.1	-7.63333	0.416333
fda_ligand_1409.pdbqt	ZINC000000895154	kuvan	-7.3	-7	-7.4	-7.23333	0.208167
fda_ligand_1410.pdbqt	ZINC000006827695	ZINC6827695	-6.4	-6.4	-6.2	-6.33333	0.11547
fda_ligand_1411.pdbqt	ZINC000006827695	ZINC6827695	-6.4	-6.4	-6.2	-6.33333	0.11547
fda_ligand_1412.pdbqt	ZINC000006827695	ZINC6827695	-5.8	-5.9	-5.5	-5.73333	0.208167
fda_ligand_1413.pdbqt	ZINC000000001644	mafenide	-5.5	-6.1	-6.5	-6.03333	0.503322
fda_ligand_1414.pdbqt	ZINC000000001587	isocarboxazide	-6.4	-6.5	-7	-6.63333	0.321455
fda_ligand_1415.pdbqt	ZINC000000000740	restoril	-6.3	-6.3	-8.6	-7.06667	1.32791
fda_ligand_1416.pdbqt	ZINC000000000751	tbz	-6.6	-6.5	-6.5	-6.53333	0.057735
fda_ligand_1417.pdbqt	ZINC000000000751	tbz	-6.3	-6.2	-6.5	-6.33333	0.152753
fda_ligand_1418.pdbqt	ZINC000000000751	tbz	-6.2	-6.3	-6.4	-6.3	0.1
fda_ligand_1419.pdbqt	ZINC000000001016	benzoyl	-6.4	-6.6	-7	-6.66667	0.305505
fda_ligand_1420.pdbqt	ZINC000000056568	benzenebutyrate	-5.8	-5.9	-5.8	-5.83333	0.057735
fda_ligand_1421.pdbqt	ZINC000000005151	neupro	-5.7	-5.6	-6	-5.76667	0.208167
fda_ligand_1422.pdbqt	ZINC000000005151	neupro	-5.7	-5.6	-6	-5.76667	0.208167
fda_ligand_1423.pdbqt	ZINC000003943279	pradaxa	-6.7	-7.1	-6.7	-6.83333	0.23094
fda_ligand_1424.pdbqt	ZINC000001532728	betaine	-4.2	-4.2	-4.3	-4.23333	0.057735
fda_ligand_1425.pdbqt	ZINC000000020255	amd	-6.5	-6.6	-7.1	-6.73333	0.321455
fda_ligand_1426.pdbqt	ZINC000000001795	niaspan	-5.2	-5.2	-5.2	-5.2	0
fda_ligand_1427.pdbqt	ZINC000000896698	effexor	-5.8	-5.8	-6.2	-5.93333	0.23094
fda_ligand_1428.pdbqt	ZINC000000896698	effexor	-5.5	-5.5	-6.4	-5.8	0.519615
fda_ligand_1429.pdbqt	ZINC000000897385	vagistat-1	-6.3	-6.5	-6.7	-6.5	0.2
fda_ligand_1430.pdbqt	ZINC000000897385	vagistat-1	-6.1	-6.2	-6.7	-6.33333	0.321455
fda_ligand_1431.pdbqt	ZINC000000968275	trimipramine	-5.8	-5.9	-5.5	-5.73333	0.208167
fda_ligand_1432.pdbqt	ZINC000001842633	tomoxetine	-5.5	-5.8	-6.4	-5.9	0.458258
fda_ligand_1433.pdbqt	ZINC000001850377	nix	-5.8	-6	-6	-5.93333	0.11547
fda_ligand_1434.pdbqt	ZINC000000968256	amantadine	-5.4	-5.4	-5.5	-5.43333	0.057735
fda_ligand_1435.pdbqt	ZINC000000968305	benzphetamine	-5	-4.9	-6	-5.3	0.608276
fda_ligand_1436.pdbqt	ZINC000000968305	benzphetamine	-4.9	-5.1	-5.4	-5.13333	0.251661
fda_ligand_1437.pdbqt	ZINC000000897322	skelaxin	-6.3	-6.5	-6.6	-6.46667	0.152753
fda_ligand_1438.pdbqt	ZINC000000968274	trihexyphenidyl	-5.5	-5.4	-6.1	-5.66667	0.378594
fda_ligand_1439.pdbqt	ZINC000003929508	oseltamivir	-5.9	-6.7	-6.7	-6.43333	0.46188
fda_ligand_1440.pdbqt	ZINC000003936683	solifenacin	-7.3	-6.9	-7.1	-7.1	0.2
fda_ligand_1441.pdbqt	ZINC000003936683	solifenacin	-7.3	-6.9	-7.1	-7.1	0.2
fda_ligand_1442.pdbqt	ZINC000000001505	ganciclovir	-6.6	-6.8	-7.7	-7.03333	0.585947
fda_ligand_1443.pdbqt	ZINC000000000941	arimidex	-6.1	-6.2	-6.6	-6.3	0.264575
fda_ligand_1444.pdbqt	ZINC000000000596	pentazocine	-6.8	-6.7	-8.1	-7.2	0.781025
fda_ligand_1445.pdbqt	ZINC000000000596	pentazocine	-6.6	-6.7	-7.5	-6.93333	0.493288
fda_ligand_1446.pdbqt	ZINC000000001655	meclofenamate	-6.7	-6.6	-6.7	-6.66667	0.057735
fda_ligand_1447.pdbqt	ZINC000000119344	aminohippurate	-6.5	-6.5	-7.3	-6.76667	0.46188
fda_ligand_1448.pdbqt	ZINC000012468792	xalatan	-5.4	-5.1	-6.1	-5.53333	0.51316
fda_ligand_1449.pdbqt	ZINC000012402836	clomifeno	-5.4	-5.7	-5.7	-5.6	0.173205
fda_ligand_1450.pdbqt	ZINC000021303210	brimonidine	-6	-6.2	-7.1	-6.43333	0.585947
fda_ligand_1451.pdbqt	ZINC000021303210	brimonidine	-5.7	-6.8	-7.2	-6.56667	0.776745
fda_ligand_1452.pdbqt	ZINC000000538283	remifentanil	-6	-5.9	-6.3	-6.06667	0.208167
fda_ligand_1453.pdbqt	ZINC000000538283	remifentanil	-6.2	-6.4	-6.7	-6.43333	0.251661
fda_ligand_1454.pdbqt	ZINC000003871703	bepreve	-6.2	-6.1	-6.9	-6.4	0.43589
fda_ligand_1455.pdbqt	ZINC000000896455	brompheniramine	-5.3	-5.3	-6.6	-5.73333	0.750555
fda_ligand_1456.pdbqt	ZINC000000896523	esmolol	-5.3	-5.3	-5.9	-5.5	0.34641
fda_ligand_1457.pdbqt	ZINC000003873160	losartan	-7.2	-7.4	-6.7	-7.1	0.360555
fda_ligand_1458.pdbqt	ZINC000003873160	losartan	-7.1	-7.3	-7.4	-7.26667	0.152753
fda_ligand_1459.pdbqt	ZINC000003918453	ertapenem	-7.7	-7.8	-7.4	-7.63333	0.208167
fda_ligand_1460.pdbqt	ZINC000000403010	labetalol	-6	-6.2	-7.4	-6.53333	0.757188
fda_ligand_1461.pdbqt	ZINC000000403010	labetalol	-5.9	-6.1	-7.1	-6.36667	0.64291
fda_ligand_1462.pdbqt	ZINC000003079336	acetylcholine	-5.1	-5	-4.9	-5	0.1
fda_ligand_1463.pdbqt	ZINC000003813088	edex	-5.4	-6.1	-6.8	-6.1	0.7
fda_ligand_1464.pdbqt	ZINC000003830993	thyroxine	-5.4	-5.4	-5.3	-5.36667	0.057735
fda_ligand_1465.pdbqt	ZINC000003830993	thyroxine	-5.5	-5.3	-5.5	-5.43333	0.11547
fda_ligand_1466.pdbqt	ZINC000003785276	epa-e	-4.5	-4.3	-5.4	-4.73333	0.585947
fda_ligand_1467.pdbqt	ZINC000004658560	lactate	-4.4	-4.4	-4.7	-4.5	0.173205
fda_ligand_1468.pdbqt	ZINC000003831417	retinol	-5.5	-5.3	-5.6	-5.46667	0.152753
fda_ligand_1469.pdbqt	ZINC000003801919	alendronate	-6.4	-6.3	-6.3	-6.33333	0.057735
fda_ligand_1470.pdbqt	ZINC000003801919	alendronate	-6.3	-6.2	-6.4	-6.3	0.1
fda_ligand_1471.pdbqt	ZINC000003801919	alendronate	-6.3	-6.2	-6.4	-6.3	0.1
fda_ligand_1472.pdbqt	ZINC000004658553	ala	-4.2	-4.2	-4.1	-4.16667	0.057735
fda_ligand_1473.pdbqt	ZINC000003079340	carnitor	-5.6	-5.7	-5.4	-5.56667	0.152753
fda_ligand_1474.pdbqt	ZINC000003920027	flovent	-6.8	-6.8	-6.9	-6.83333	0.057735
fda_ligand_1475.pdbqt	ZINC000003831332	k-ject	-4.7	-5.1	-4.6	-4.8	0.264575
fda_ligand_1476.pdbqt	ZINC000000083315	tryptophan	-6.4	-6.4	-6.7	-6.5	0.173205
fda_ligand_1477.pdbqt	ZINC000000388081	histamine	-4.5	-4.5	-4.8	-4.6	0.173205
fda_ligand_1478.pdbqt	ZINC000000388081	histamine	-4.7	-4.9	-5	-4.86667	0.152753
fda_ligand_1479.pdbqt	ZINC000000388081	histamine	-4.8	-4.8	-5.1	-4.9	0.173205
fda_ligand_1480.pdbqt	ZINC000000509440	oxazepam	-6.9	-6.3	-7.1	-6.76667	0.416333
fda_ligand_1481.pdbqt	ZINC000000388462	phenylacetate	-5.7	-5.7	-5.6	-5.66667	0.057735
fda_ligand_1482.pdbqt	ZINC000000266964	tyr	-5.7	-5.9	-6.1	-5.9	0.2
fda_ligand_1483.pdbqt	ZINC000036766734	ZINC36766734	-5.5	-5.8	-6.2	-5.83333	0.351188
fda_ligand_1484.pdbqt	ZINC000096014710	ZINC96014710	-6	-6	-6.4	-6.13333	0.23094
fda_ligand_1485.pdbqt	ZINC000003812983	morphine	-7	-7	-7	-7	0
fda_ligand_1486.pdbqt	ZINC000003812983	morphine	-6.9	-7.4	-7.5	-7.26667	0.321455
fda_ligand_1487.pdbqt	ZINC000000000471	skelaxin	-6.1	-6.7	-7.3	-6.7	0.6
fda_ligand_1488.pdbqt	ZINC000000000494	metipranolol	-5.4	-5.7	-5.6	-5.56667	0.152753
fda_ligand_1489.pdbqt	ZINC000000000449	cantil	-6	-6.1	-6.9	-6.33333	0.493288
fda_ligand_1490.pdbqt	ZINC000000000416	labetalol	-6.1	-6.3	-7.3	-6.56667	0.64291
fda_ligand_1491.pdbqt	ZINC000000000416	labetalol	-6.2	-6.2	-6.5	-6.3	0.173205
fda_ligand_1492.pdbqt	ZINC000003927198	cfdn	-7.6	-7.6	-8.3	-7.83333	0.404145
fda_ligand_1493.pdbqt	ZINC000003927198	cfdn	-7.3	-7.3	-7.8	-7.46667	0.288675
fda_ligand_1494.pdbqt	ZINC000003927870	fludarabine	-7.8	-8	-8.2	-8	0.2
fda_ligand_1495.pdbqt	ZINC000003927870	fludarabine	-8.5	-8.6	-8.4	-8.5	0.1
fda_ligand_1496.pdbqt	ZINC000003927870	fludarabine	-8.5	-8.6	-8.4	-8.5	0.1
fda_ligand_1497.pdbqt	ZINC000000599985	ampyra	-4.1	-4.1	-4.2	-4.13333	0.057735
fda_ligand_1498.pdbqt	ZINC000000599985	ampyra	-4.1	-4.1	-4.2	-4.13333	0.057735
fda_ligand_1499.pdbqt	ZINC000000599734	lansoprazole	-7.4	-7.4	-7.3	-7.36667	0.057735
fda_ligand_1500.pdbqt	ZINC000000896740	miconazole	-6.7	-6.9	-7.2	-6.93333	0.251661
fda_ligand_1501.pdbqt	ZINC000000896740	miconazole	-6.6	-6.7	-6.8	-6.7	0.1
fda_ligand_1502.pdbqt	ZINC000000643055	econazole	-6.7	-6.5	-6.8	-6.66667	0.152753
fda_ligand_1503.pdbqt	ZINC000000643055	econazole	-6.5	-6.7	-7.1	-6.76667	0.305505
fda_ligand_1504.pdbqt	ZINC000000044027	chlorpromazine	-5.5	-5.3	-6	-5.6	0.360555
fda_ligand_1505.pdbqt	ZINC000003830212	amiodarone	-5.2	-5.4	-5.3	-5.3	0.1
fda_ligand_1506.pdbqt	ZINC000003830212	amiodarone	-5.1	-5.4	-5.1	-5.2	0.173205
fda_ligand_1507.pdbqt	ZINC000000601250	sulconazole	-6.1	-5.9	-7.1	-6.36667	0.64291
fda_ligand_1508.pdbqt	ZINC000000601250	sulconazole	-6.2	-6.4	-7.4	-6.66667	0.64291
fda_ligand_1509.pdbqt	ZINC000000607971	miconazole	-5.8	-5.9	-7.2	-6.3	0.781025
fda_ligand_1510.pdbqt	ZINC000000607971	miconazole	-6	-5.7	-7.5	-6.4	0.964365
fda_ligand_1511.pdbqt	ZINC000038212689	carac	-5.4	-5.3	-5.4	-5.36667	0.057735
fda_ligand_1512.pdbqt	ZINC000038212689	carac	-5.1	-5.2	-6	-5.43333	0.493288
fda_ligand_1513.pdbqt	ZINC000000597013	donepezil	-6.4	-6.8	-6.6	-6.6	0.2
fda_ligand_1514.pdbqt	ZINC000000597013	donepezil	-6.3	-6.8	-6.7	-6.6	0.264575
fda_ligand_1515.pdbqt	ZINC000006409735	clioquinol	-5.4	-5.7	-6	-5.7	0.3
fda_ligand_1516.pdbqt	ZINC000006409735	clioquinol	-5.4	-5.6	-5.9	-5.63333	0.251661
fda_ligand_1517.pdbqt	ZINC000000000469	orciprenaline	-5.6	-5.6	-6.5	-5.9	0.519615
fda_ligand_1518.pdbqt	ZINC000000120319	sda	-6	-6.3	-7.5	-6.6	0.793725
fda_ligand_1519.pdbqt	ZINC000000120319	sda	-6.2	-6.5	-6.9	-6.53333	0.351188
fda_ligand_1520.pdbqt	ZINC000000121541	mebendazole	-7.1	-7.3	-7.6	-7.33333	0.251661
fda_ligand_1521.pdbqt	ZINC000000000431	ativan	-6.6	-6.4	-7	-6.66667	0.305505
fda_ligand_1522.pdbqt	ZINC000014261579	alvesco	-7.8	-7.6	-7.3	-7.56667	0.251661
fda_ligand_1523.pdbqt	ZINC000001530968	phisohex	-6.1	-6.2	-6.7	-6.33333	0.321455
fda_ligand_1524.pdbqt	ZINC000001530968	phisohex	-6	-6.4	-6.8	-6.4	0.4
fda_ligand_1525.pdbqt	ZINC000001539579	targretin	-6.7	-7.1	-7.6	-7.13333	0.450925
fda_ligand_1526.pdbqt	ZINC000001554274	rilpivirine	-6.9	-7.1	-7	-7	0.1
fda_ligand_1527.pdbqt	ZINC000001530636	famotidine	-7.8	-8	-8.3	-8.03333	0.251661
fda_ligand_1528.pdbqt	ZINC000001530636	famotidine	-7.8	-8.2	-8.3	-8.1	0.264575
fda_ligand_1529.pdbqt	ZINC000000584092	fnf	-5.8	-6	-6.2	-6	0.2
fda_ligand_1530.pdbqt	ZINC000001493878	sorafenib	-8	-8.1	-7.8	-7.96667	0.152753
fda_ligand_1531.pdbqt	ZINC000002847375	diethylpropion	-5.2	-4.9	-5.9	-5.33333	0.51316
fda_ligand_1532.pdbqt	ZINC000002847375	diethylpropion	-4.8	-4.9	-5.8	-5.16667	0.550757
fda_ligand_1533.pdbqt	ZINC000000896695	trometamol	-4.3	-4.3	-4.3	-4.3	0
fda_ligand_1534.pdbqt	ZINC000000896695	trometamol	-4.3	-4.3	-4.3	-4.3	0
fda_ligand_1535.pdbqt	ZINC000000901552	bal	-3.3	-3.3	-3.4	-3.33333	0.057735
fda_ligand_1536.pdbqt	ZINC000000901555	bal	-3.4	-3.3	-3.4	-3.36667	0.057735
fda_ligand_1537.pdbqt	ZINC000100037020	see	-6.2	-6.4	-6.7	-6.43333	0.251661
fda_ligand_1538.pdbqt	ZINC000100037020	see	-6.3	-6.3	-6.7	-6.43333	0.23094
fda_ligand_1539.pdbqt	ZINC000100037020	see	-6.5	-6.6	-6.9	-6.66667	0.208167
fda_ligand_1540.pdbqt	ZINC000000518554	arbutin	-6.5	-6.5	-8.1	-7.03333	0.92376
fda_ligand_1541.pdbqt	ZINC000035902489	xalkori	-6.6	-6.6	-7.3	-6.83333	0.404145
fda_ligand_1542.pdbqt	ZINC000035902489	xalkori	-6.7	-6.7	-7	-6.8	0.173205
fda_ligand_1543.pdbqt	ZINC000000020237	emla	-5.2	-5.2	-5.2	-5.2	0
fda_ligand_1544.pdbqt	ZINC000000020237	emla	-5.2	-5.2	-5.2	-5.2	0
fda_ligand_1545.pdbqt	ZINC000000020251	phentolamine	-6	-6.5	-7.1	-6.53333	0.550757
fda_ligand_1546.pdbqt	ZINC000000020240	propranolol	-6.2	-6.3	-6.3	-6.26667	0.057735
fda_ligand_1547.pdbqt	ZINC000000020241	mefenamic	-6.4	-6.6	-6.6	-6.53333	0.11547
fda_ligand_1548.pdbqt	ZINC000035342789	tasmar	-7.2	-7	-7.3	-7.16667	0.152753
fda_ligand_1549.pdbqt	ZINC000035653007	prasugrel	-6.6	-6.9	-6.7	-6.73333	0.152753
fda_ligand_1550.pdbqt	ZINC000035653009	prasugrel	-6.5	-6.8	-6.8	-6.7	0.173205
fda_ligand_1551.pdbqt	ZINC000035801098	indacaterol	-7.3	-7.4	-7.7	-7.46667	0.208167
fda_ligand_1552.pdbqt	ZINC000035801098	indacaterol	-6.6	-7.5	-7.1	-7.06667	0.450925
fda_ligand_1553.pdbqt	ZINC000000000509	mirtazapine	-6.2	-6.2	-6	-6.13333	0.11547
fda_ligand_1554.pdbqt	ZINC000000000509	mirtazapine	-6.2	-6.2	-6	-6.13333	0.11547
fda_ligand_1555.pdbqt	ZINC000000000509	mirtazapine	-6.2	-6.2	-6.1	-6.16667	0.057735
fda_ligand_1556.pdbqt	ZINC000001554392	hexaminolevulinate	-5.1	-5	-5.6	-5.23333	0.321455
fda_ligand_1557.pdbqt	ZINC000001554392	hexaminolevulinate	-5.3	-5.3	-5.9	-5.5	0.34641
fda_ligand_1558.pdbqt	ZINC000035328014	ibrutinib	-7.1	-7.5	-7.1	-7.23333	0.23094
fda_ligand_1559.pdbqt	ZINC000035328014	ibrutinib	-7.1	-7.4	-7	-7.16667	0.208167
fda_ligand_1560.pdbqt	ZINC000000001261	aerius	-6.5	-6.3	-6.7	-6.5	0.2
fda_ligand_1561.pdbqt	ZINC000000001281	diclofenac	-6.4	-6.6	-6.8	-6.6	0.2
fda_ligand_1562.pdbqt	ZINC000000001341	edrophonium	-5.1	-5.3	-5.8	-5.4	0.360555
fda_ligand_1563.pdbqt	ZINC000000001341	edrophonium	-4.9	-5	-5.6	-5.16667	0.378594
fda_ligand_1564.pdbqt	ZINC000000001408	amidate	-6	-6.2	-6.1	-6.1	0.1
fda_ligand_1565.pdbqt	ZINC000008214614	miltefosine	-4.3	-4.8	-4.6	-4.56667	0.251661
fda_ligand_1566.pdbqt	ZINC000008214614	miltefosine	-4.9	-4.1	-4.6	-4.53333	0.404145
fda_ligand_1567.pdbqt	ZINC000000000507	midodrine	-6.6	-6.4	-6.7	-6.56667	0.152753
fda_ligand_1568.pdbqt	ZINC000000000507	midodrine	-6.9	-6.7	-7.2	-6.93333	0.251661
fda_ligand_1569.pdbqt	ZINC000008034120	ZINC8034120	-5	-4.9	-4.8	-4.9	0.1
fda_ligand_1570.pdbqt	ZINC000008214625	nitroglycerin	-6.9	-6.9	-6.8	-6.86667	0.057735
fda_ligand_1571.pdbqt	ZINC000008552123	tbz	-6.5	-6.2	-6.4	-6.36667	0.152753
fda_ligand_1572.pdbqt	ZINC000008552123	tbz	-6.5	-6.2	-6.5	-6.4	0.173205
fda_ligand_1573.pdbqt	ZINC000008552123	tbz	-6.5	-6.3	-6.4	-6.4	0.1
fda_ligand_1574.pdbqt	ZINC000007997568	macrobid	-8.1	-8.4	-7.9	-8.13333	0.251661
fda_ligand_1575.pdbqt	ZINC000007997568	macrobid	-7	-8.3	-7.7	-7.66667	0.650641
fda_ligand_1576.pdbqt	ZINC000007997952	doxylamine	-5.2	-5.1	-6.8	-5.7	0.953939
fda_ligand_1577.pdbqt	ZINC000007997952	doxylamine	-5.2	-5.2	-6.5	-5.63333	0.750555
fda_ligand_1578.pdbqt	ZINC000019166988	procarbazin	-6.5	-6.4	-6.5	-6.46667	0.057735
fda_ligand_1579.pdbqt	ZINC000019228902	pzc	-6.2	-6.9	-6.7	-6.6	0.360555
fda_ligand_1580.pdbqt	ZINC000019228902	pzc	-6.2	-6.2	-6.7	-6.36667	0.288675
fda_ligand_1581.pdbqt	ZINC000019228902	pzc	-6.3	-6.7	-6.8	-6.6	0.264575
fda_ligand_1582.pdbqt	ZINC000019166991	phenelzine	-6.3	-6.3	-6.3	-6.3	0
fda_ligand_1583.pdbqt	ZINC000008437287	asclera	-4.4	-4.6	-4.6	-4.53333	0.11547
fda_ligand_1584.pdbqt	ZINC000019156872	cyclizine	-5.4	-5.3	-6.7	-5.8	0.781025
fda_ligand_1585.pdbqt	ZINC000019156872	cyclizine	-5.4	-5.3	-6.6	-5.76667	0.723418
fda_ligand_1586.pdbqt	ZINC000019156872	cyclizine	-5.4	-5.4	-6.6	-5.8	0.69282
fda_ligand_1587.pdbqt	ZINC000019203912	fluphenazine	-6.4	-7.1	-7.2	-6.9	0.43589
fda_ligand_1588.pdbqt	ZINC000019203912	fluphenazine	-6.5	-7	-7.2	-6.9	0.360555
fda_ligand_1589.pdbqt	ZINC000019203912	fluphenazine	-6.6	-6.5	-7.3	-6.8	0.43589
fda_ligand_1590.pdbqt	ZINC000008220878	ibutilide	-5.1	-4.7	-5.2	-5	0.264575
fda_ligand_1591.pdbqt	ZINC000008220878	ibutilide	-5	-4.3	-6	-5.1	0.8544
fda_ligand_1592.pdbqt	ZINC000019144226	chloroquine	-5	-5.2	-5.6	-5.26667	0.305505
fda_ligand_1593.pdbqt	ZINC000019144226	chloroquine	-5.3	-5	-5.6	-5.3	0.3
fda_ligand_1594.pdbqt	ZINC000019168887	carbidopa	-6.6	-6.8	-7.3	-6.9	0.360555
fda_ligand_1595.pdbqt	ZINC000000007601	salbutamol	-5.9	-5.6	-6.6	-6.03333	0.51316
fda_ligand_1596.pdbqt	ZINC000000012346	epivir	-6.3	-6.3	-7.5	-6.7	0.69282
fda_ligand_1597.pdbqt	ZINC000000014007	altol	-5.9	-6.1	-6.2	-6.06667	0.152753
fda_ligand_1598.pdbqt	ZINC000036520252	empagliflozin	-7.4	-7.3	-7.1	-7.26667	0.152753
fda_ligand_1599.pdbqt	ZINC000008015016	medronic acid	-5.1	-5.1	-4.9	-5.03333	0.11547
fda_ligand_1600.pdbqt	ZINC000008015016	medronic acid	-5	-4.9	-5.8	-5.23333	0.493288
fda_ligand_1601.pdbqt	ZINC000008015016	medronic acid	-5	-4.9	-5.5	-5.13333	0.321455
fda_ligand_1602.pdbqt	ZINC000008214402	ibutilide	-5	-5	-5	-5	0
fda_ligand_1603.pdbqt	ZINC000008214402	ibutilide	-4.9	-5	-5	-4.96667	0.057735
fda_ligand_1604.pdbqt	ZINC000019144216	pyrilamine	-5.4	-5.6	-6.5	-5.83333	0.585947
fda_ligand_1605.pdbqt	ZINC000019144216	pyrilamine	-5.5	-6.1	-6.3	-5.96667	0.416333
fda_ligand_1606.pdbqt	ZINC000000014037	milnacipran	-5.6	-5.4	-6.2	-5.73333	0.416333
fda_ligand_1607.pdbqt	ZINC000000014360	imigran	-6.5	-6.4	-7.1	-6.66667	0.378594
fda_ligand_1608.pdbqt	ZINC000000015515	zmt	-7.5	-7.6	-7.5	-7.53333	0.057735
fda_ligand_1609.pdbqt	ZINC000000035804	furosemide	-6.9	-7.1	-7.2	-7.06667	0.152753
fda_ligand_1610.pdbqt	ZINC000000643046	persantine	-5.3	-5.1	-5.5	-5.3	0.2
fda_ligand_1611.pdbqt	ZINC000000020257	mexiletine	-5	-5.1	-5.9	-5.33333	0.493288
fda_ligand_1612.pdbqt	ZINC000000020230	salbutamol	-5.8	-5.6	-6.6	-6	0.52915
fda_ligand_1613.pdbqt	ZINC000000020250	promethazine	-5.3	-5.4	-6	-5.56667	0.378594
fda_ligand_1614.pdbqt	ZINC000000601229	azelastine	-6.6	-6.9	-6.8	-6.76667	0.152753
fda_ligand_1615.pdbqt	ZINC000000601229	azelastine	-6.3	-6.9	-6.3	-6.5	0.34641
fda_ligand_1616.pdbqt	ZINC000000601229	azelastine	-6.5	-6.4	-6.8	-6.56667	0.208167
fda_ligand_1617.pdbqt	ZINC000000601305	indapamide	-6.4	-6.8	-6.5	-6.56667	0.208167
fda_ligand_1618.pdbqt	ZINC000000004009	diflucan	-6.4	-6.7	-7.6	-6.9	0.6245
fda_ligand_1619.pdbqt	ZINC000000004028	neupro	-5.7	-5.6	-5.6	-5.63333	0.057735
fda_ligand_1620.pdbqt	ZINC000000004028	neupro	-5.5	-5.5	-6.1	-5.7	0.34641
fda_ligand_1621.pdbqt	ZINC000001530803	felbatol	-7.3	-7.3	-7.4	-7.33333	0.057735
fda_ligand_1622.pdbqt	ZINC000004097416	ZINC4097416	-6.3	-6.4	-6.7	-6.46667	0.208167
fda_ligand_1623.pdbqt	ZINC000011680067	ZINC11680067	-6.4	-6.5	-6.8	-6.56667	0.208167
fda_ligand_1624.pdbqt	ZINC000001530806	zarontin	-5.4	-5.5	-5.6	-5.5	0.1
fda_ligand_1625.pdbqt	ZINC000001530638	fluoxetine	-6	-5.8	-6.3	-6.03333	0.251661
fda_ligand_1626.pdbqt	ZINC000001530654	hydroxychloroquine	-5.5	-5.9	-5.9	-5.76667	0.23094
fda_ligand_1627.pdbqt	ZINC000001530654	hydroxychloroquine	-5.9	-6	-5.6	-5.83333	0.208167
fda_ligand_1628.pdbqt	ZINC000001530654	hydroxychloroquine	-5.4	-5.7	-6	-5.7	0.3
fda_ligand_1629.pdbqt	ZINC000001530654	hydroxychloroquine	-5.5	-5.6	-5.9	-5.66667	0.208167
fda_ligand_1630.pdbqt	ZINC000001530695	thioridazine	-5.9	-5.9	-6.2	-6	0.173205
fda_ligand_1631.pdbqt	ZINC000001530695	thioridazine	-5.6	-5.8	-6.3	-5.9	0.360555
fda_ligand_1632.pdbqt	ZINC000001530695	thioridazine	-5.7	-5.8	-6.1	-5.86667	0.208167
fda_ligand_1633.pdbqt	ZINC000001530701	meprobamate	-6.5	-6.6	-6.6	-6.56667	0.057735
fda_ligand_1634.pdbqt	ZINC000001530940	dyclonine	-5	-5.5	-6.2	-5.56667	0.602771
fda_ligand_1635.pdbqt	ZINC000001530940	dyclonine	-5.4	-5.6	-5.9	-5.63333	0.251661
fda_ligand_1636.pdbqt	ZINC000001530805	zarontin	-5.5	-5.5	-5.5	-5.5	0
fda_ligand_1637.pdbqt	ZINC000001530951	soma	-6.2	-6.3	-6	-6.16667	0.152753
fda_ligand_1638.pdbqt	ZINC000001530756	procainamide	-5.2	-5.1	-5.5	-5.26667	0.208167
fda_ligand_1639.pdbqt	ZINC000001530762	proparacaine	-5.7	-6	-5.9	-5.86667	0.152753
fda_ligand_1640.pdbqt	ZINC000001530762	proparacaine	-5.7	-6.1	-5.9	-5.9	0.2
fda_ligand_1641.pdbqt	ZINC000001530769	propoxyphene	-5.6	-5.4	-6.1	-5.7	0.360555
fda_ligand_1642.pdbqt	ZINC000003813061	bumetanide	-7	-6.7	-7.3	-7	0.3
fda_ligand_1643.pdbqt	ZINC000003830339	bunolol	-5.2	-5.3	-5.6	-5.36667	0.208167
fda_ligand_1644.pdbqt	ZINC000003812984	levorphanol	-6.6	-6.5	-7.8	-6.96667	0.723418
fda_ligand_1645.pdbqt	ZINC000003812984	levorphanol	-6.3	-6.4	-8.3	-7	1.12694
fda_ligand_1646.pdbqt	ZINC000003823492	arranon	-7.2	-7.2	-7.3	-7.23333	0.057735
fda_ligand_1647.pdbqt	ZINC000000896595	ativan	-7	-6.1	-7.7	-6.93333	0.802081
fda_ligand_1648.pdbqt	ZINC000000968264	cyproheptadine	-6.7	-6.5	-6	-6.4	0.360555
fda_ligand_1649.pdbqt	ZINC000000968264	cyproheptadine	-6.4	-6.3	-6.2	-6.3	0.1
fda_ligand_1650.pdbqt	ZINC000001639567	tranylcypromine	-4.5	-4.7	-5	-4.73333	0.251661
fda_ligand_1651.pdbqt	ZINC000003798734	acetretin	-5.7	-5.7	-5.4	-5.6	0.173205
fda_ligand_1652.pdbqt	ZINC000003812863	lisinopril	-6.4	-6.3	-7.9	-6.86667	0.896289
fda_ligand_1653.pdbqt	ZINC000003812863	lisinopril	-7	-6.3	-6.2	-6.5	0.43589
fda_ligand_1654.pdbqt	ZINC000043763856	mecamylamine	-5.5	-5.4	-5.6	-5.5	0.1
fda_ligand_1655.pdbqt	ZINC000003791297	enalapril	-6.5	-6.3	-7.4	-6.73333	0.585947
fda_ligand_1656.pdbqt	ZINC000003830813	etidronate	-5.4	-5.4	-5.5	-5.43333	0.057735
fda_ligand_1657.pdbqt	ZINC000003830813	etidronate	-5.3	-5.4	-5.4	-5.36667	0.057735
fda_ligand_1658.pdbqt	ZINC000003830813	etidronate	-5.4	-5.4	-5.5	-5.43333	0.057735
fda_ligand_1659.pdbqt	ZINC000000896709	methylphenidate	-5.5	-5.8	-6.3	-5.86667	0.404145
fda_ligand_1660.pdbqt	ZINC000000896755	zaroxolyn	-6.5	-6.9	-6.8	-6.73333	0.208167
fda_ligand_1661.pdbqt	ZINC000000896968	cuvposa	-6	-5.8	-6.2	-6	0.2
fda_ligand_1662.pdbqt	ZINC000000897222	bhft	-7.2	-7.1	-8	-7.43333	0.493288
fda_ligand_1663.pdbqt	ZINC000004095696	cilastatin	-5.9	-6.2	-6.3	-6.13333	0.208167
fda_ligand_1664.pdbqt	ZINC000000002191	tolmetin	-6.6	-6.9	-7	-6.83333	0.208167
fda_ligand_1665.pdbqt	ZINC000013129998	meloxicam	-6.8	-7.2	-7	-7	0.2
fda_ligand_1666.pdbqt	ZINC000169289767	trypan blue	-8.2	-9	-8.3	-8.5	0.43589
fda_ligand_1667.pdbqt	ZINC000169621200	ZINC169621200	-7.2	-7.2	-7.5	-7.3	0.173205
fda_ligand_1668.pdbqt	ZINC000169621223	ZINC169621223	-6.8	-7	-6.9	-6.9	0.1
fda_ligand_1669.pdbqt	ZINC000169621223	ZINC169621223	-6.8	-7	-7	-6.93333	0.11547
fda_ligand_1670.pdbqt	ZINC000169621223	ZINC169621223	-6.7	-7.1	-6.7	-6.83333	0.23094
fda_ligand_1671.pdbqt	ZINC000001535101	rosuvastatin	-6	-6.1	-6.4	-6.16667	0.208167
fda_ligand_1672.pdbqt	ZINC000000001681	pethidine	-6.3	-6.5	-6.5	-6.43333	0.11547
fda_ligand_1673.pdbqt	ZINC000000001681	pethidine	-6.3	-6.6	-6.5	-6.46667	0.152753
fda_ligand_1674.pdbqt	ZINC000000000931	amoxapine	-6.2	-6.2	-6.5	-6.3	0.173205
fda_ligand_1675.pdbqt	ZINC000000000931	amoxapine	-6.2	-6.4	-6.7	-6.43333	0.251661
fda_ligand_1676.pdbqt	ZINC000000001758	myfortic	-7.1	-7.1	-7.1	-7.1	0
fda_ligand_1677.pdbqt	ZINC000003938746	reserpine	-7.6	-8.1	-7.4	-7.7	0.360555
fda_ligand_1678.pdbqt	ZINC000003938746	reserpine	-7.7	-7.9	-7.4	-7.66667	0.251661
fda_ligand_1679.pdbqt	ZINC000003938746	reserpine	-7.7	-7.9	-7.4	-7.66667	0.251661
fda_ligand_1680.pdbqt	ZINC000003938684	toposar	-7.2	-7.2	-7.8	-7.4	0.34641
fda_ligand_1681.pdbqt	ZINC000000403079	midodrine	-6.5	-6.6	-6.7	-6.6	0.1
fda_ligand_1682.pdbqt	ZINC000000403079	midodrine	-6.8	-6.9	-6.8	-6.83333	0.057735
fda_ligand_1683.pdbqt	ZINC000000403566	biltricide	-6.3	-6.6	-6.6	-6.5	0.173205
fda_ligand_1684.pdbqt	ZINC000000003911	dobutamine	-5.8	-5.8	-8	-6.53333	1.27017
fda_ligand_1685.pdbqt	ZINC000003797541	zytiga	-7	-6.9	-8.3	-7.4	0.781025
fda_ligand_1686.pdbqt	ZINC000003807172	argatroban	-8.6	-7.7	-8	-8.1	0.458258
fda_ligand_1687.pdbqt	ZINC000003812888	verapamil	-5.7	-5.5	-5.3	-5.5	0.2
fda_ligand_1688.pdbqt	ZINC000003812888	verapamil	-5.2	-5.5	-5.5	-5.4	0.173205
fda_ligand_1689.pdbqt	ZINC000003786192	sulindac	-6.3	-6.9	-6.6	-6.6	0.3
fda_ligand_1690.pdbqt	ZINC000003819138	dapagliflozin	-6.8	-7.2	-6.8	-6.93333	0.23094
fda_ligand_1691.pdbqt	ZINC000003830579	clidinium	-6.2	-6.3	-7.1	-6.53333	0.493288
fda_ligand_1692.pdbqt	ZINC000001853550	sertraline	-5.8	-6.7	-7	-6.5	0.6245
fda_ligand_1693.pdbqt	ZINC000003651680	butabarbital	-6.4	-6.4	-6.5	-6.43333	0.057735
fda_ligand_1694.pdbqt	ZINC000003651680	butabarbital	-6.4	-6.4	-6.5	-6.43333	0.057735
fda_ligand_1695.pdbqt	ZINC000003776970	cefprozil anhydrous	-7.5	-7.6	-7.8	-7.63333	0.152753
fda_ligand_1696.pdbqt	ZINC000003776970	cefprozil anhydrous	-7.5	-7.6	-7.8	-7.63333	0.152753
fda_ligand_1697.pdbqt	ZINC000003781943	benazepril	-7	-6.4	-7.6	-7	0.6
fda_ligand_1698.pdbqt	ZINC000003785268	salmeterol	-5.1	-5.2	-5.4	-5.23333	0.152753
fda_ligand_1699.pdbqt	ZINC000003830453	vantin	-7.3	-7.4	-7.7	-7.46667	0.208167
fda_ligand_1700.pdbqt	ZINC000003784182	differin	-7.2	-7.2	-7.3	-7.23333	0.057735
fda_ligand_1701.pdbqt	ZINC000003816514	rolapitant	-6.1	-6.8	-8.4	-7.1	1.17898
fda_ligand_1702.pdbqt	ZINC000003816514	rolapitant	-8.1	-6.4	-8.4	-7.63333	1.07858
fda_ligand_1703.pdbqt	ZINC000003830449	cefoxitin	-8.2	-8.3	-8.1	-8.2	0.1
fda_ligand_1704.pdbqt	ZINC000003831139	modafinil	-6.3	-6.6	-6.8	-6.56667	0.251661
fda_ligand_1705.pdbqt	ZINC000003831151	montelukast	-6.5	-6.9	-8.2	-7.2	0.888819
fda_ligand_1706.pdbqt	ZINC000003831165	corgard	-5.6	-5.6	-6.2	-5.8	0.34641
fda_ligand_1707.pdbqt	ZINC000072267023	eliglustat	-5.3	-5.6	-6.4	-5.76667	0.568624
fda_ligand_1708.pdbqt	ZINC000072267023	eliglustat	-5.3	-5.7	-6.3	-5.76667	0.503322
fda_ligand_1709.pdbqt	ZINC000003629271	emtriva	-6.5	-6.6	-8	-7.03333	0.83865
fda_ligand_1710.pdbqt	ZINC000003776875	suprane	-4.9	-5	-4.9	-4.93333	0.057735
fda_ligand_1711.pdbqt	ZINC000003781664	pramipexole	-6	-6.2	-6.5	-6.23333	0.251661
fda_ligand_1712.pdbqt	ZINC000003798247	clolar	-6.7	-6.9	-7	-6.86667	0.152753
fda_ligand_1713.pdbqt	ZINC000003801163	quinapril	-6.8	-7.1	-7.5	-7.13333	0.351188
fda_ligand_1714.pdbqt	ZINC000003810860	zetia	-6.3	-6.5	-7.6	-6.8	0.7
fda_ligand_1715.pdbqt	ZINC000003812933	memantine	-6.1	-6.2	-6.4	-6.23333	0.152753
fda_ligand_1716.pdbqt	ZINC000003812989	nalbuphine	-7.4	-7.4	-8	-7.6	0.34641
fda_ligand_1717.pdbqt	ZINC000003812989	nalbuphine	-7.1	-6.3	-7.5	-6.96667	0.61101
fda_ligand_1718.pdbqt	ZINC000003806721	codeine	-6.6	-6.5	-6.7	-6.6	0.1
fda_ligand_1719.pdbqt	ZINC000003806721	codeine	-6.8	-6.5	-7	-6.76667	0.251661
fda_ligand_1720.pdbqt	ZINC000003812841	mevacor	-6.2	-6.2	-6.3	-6.23333	0.057735
fda_ligand_1721.pdbqt	ZINC000003872738	guanfacine	-7.6	-7.6	-7.5	-7.56667	0.057735
fda_ligand_1722.pdbqt	ZINC000003875393	tbz	-6.5	-6.5	-6.4	-6.46667	0.057735
fda_ligand_1723.pdbqt	ZINC000003875393	tbz	-6.2	-6.6	-6.3	-6.36667	0.208167
fda_ligand_1724.pdbqt	ZINC000003875393	tbz	-6.5	-6.6	-6.3	-6.46667	0.152753
fda_ligand_1725.pdbqt	ZINC000000011012	ketorolac	-6.9	-6.6	-7.1	-6.86667	0.251661
fda_ligand_1726.pdbqt	ZINC000000056556	propranolol	-6.1	-6.4	-6.5	-6.33333	0.208167
fda_ligand_1727.pdbqt	ZINC000000004351	alaway	-6.1	-6	-6.3	-6.13333	0.152753
fda_ligand_1728.pdbqt	ZINC000000004351	alaway	-6.3	-6	-6.3	-6.2	0.173205
fda_ligand_1729.pdbqt	ZINC000000001979	mysoline	-6.3	-6.4	-7	-6.56667	0.378594
fda_ligand_1730.pdbqt	ZINC000000002009	pyridostigmine	-5.5	-5.6	-5.6	-5.56667	0.057735
fda_ligand_1731.pdbqt	ZINC000003871832	verapamil	-5.3	-5.3	-5.4	-5.33333	0.057735
fda_ligand_1732.pdbqt	ZINC000003871832	verapamil	-5.9	-5.5	-5.3	-5.56667	0.305505
fda_ligand_1733.pdbqt	ZINC000003871978	cefuroxime	-8	-8.1	-8.1	-8.06667	0.057735
fda_ligand_1734.pdbqt	ZINC000003872605	fluvoxamine	-6	-6	-6.1	-6.03333	0.057735
fda_ligand_1735.pdbqt	ZINC000003872605	fluvoxamine	-6.3	-6.6	-6.2	-6.36667	0.208167
fda_ligand_1736.pdbqt	ZINC000003873936	zazole	-7.1	-6.6	-7.2	-6.96667	0.321455
fda_ligand_1737.pdbqt	ZINC000003873936	zazole	-6.9	-6.6	-7.3	-6.93333	0.351188
fda_ligand_1738.pdbqt	ZINC000003842753	viroptic	-6.5	-6.7	-7.6	-6.93333	0.585947
fda_ligand_1739.pdbqt	ZINC000003842753	viroptic	-6.7	-6.7	-7.7	-7.03333	0.57735
fda_ligand_1740.pdbqt	ZINC000003871541	anagrelide	-6.3	-6.6	-7.3	-6.73333	0.51316
fda_ligand_1741.pdbqt	ZINC000003871960	ceftazidime	-6.6	-6.6	-7.9	-7.03333	0.750555
fda_ligand_1742.pdbqt	ZINC000003872277	diazoxide	-6.2	-6.5	-6.8	-6.5	0.3
fda_ligand_1743.pdbqt	ZINC000003830957	iopromide	-5.6	-5.4	-5.6	-5.53333	0.11547
fda_ligand_1744.pdbqt	ZINC000003798757	altace	-6.5	-6.2	-6.8	-6.5	0.3
fda_ligand_1745.pdbqt	ZINC000003805768	ivabradine	-4.8	-5.3	-5.1	-5.06667	0.251661
fda_ligand_1746.pdbqt	ZINC000003805768	ivabradine	-5.1	-5.4	-6.3	-5.6	0.6245
fda_ligand_1747.pdbqt	ZINC000003812867	perindopril	-5.8	-5.9	-6.4	-6.03333	0.321455
fda_ligand_1748.pdbqt	ZINC000003813083	cantil	-6	-6.1	-7.1	-6.4	0.608276
fda_ligand_1749.pdbqt	ZINC000000897288	fomepizole	-4	-4	-4.5	-4.16667	0.288675
fda_ligand_1750.pdbqt	ZINC000000968257	amitriptyline	-6	-6.2	-6.3	-6.16667	0.152753
fda_ligand_1751.pdbqt	ZINC000000968327	pioglitazone	-6.4	-6.4	-6.7	-6.5	0.173205
fda_ligand_1752.pdbqt	ZINC000000968327	pioglitazone	-6.2	-6.4	-6.3	-6.3	0.1
fda_ligand_1753.pdbqt	ZINC000001849548	ihd	-6.6	-6.5	-6.5	-6.53333	0.057735
fda_ligand_1754.pdbqt	ZINC000001853205	mavik	-5.7	-6.1	-7.6	-6.46667	1.00167
fda_ligand_1755.pdbqt	ZINC000003932831	avodart	-7.4	-7.6	-7.8	-7.6	0.2
fda_ligand_1756.pdbqt	ZINC000003938686	palbociclib	-7.1	-6.7	-6.9	-6.9	0.2
fda_ligand_1757.pdbqt	ZINC000003938686	palbociclib	-7.1	-7.1	-6.9	-7.03333	0.11547
fda_ligand_1758.pdbqt	ZINC000003930376	pmea	-6.2	-6.1	-6.4	-6.23333	0.152753
fda_ligand_1759.pdbqt	ZINC000003938482	noxafil	-6.4	-7	-7.2	-6.86667	0.416333
fda_ligand_1760.pdbqt	ZINC000003938751	budesonide	-8.1	-8.2	-8.3	-8.2	0.1
fda_ligand_1761.pdbqt	ZINC000001999487	epinastine	-6.7	-6.6	-8.1	-7.13333	0.83865
fda_ligand_1762.pdbqt	ZINC000003953037	azopt	-6.6	-6.5	-7.3	-6.8	0.43589
fda_ligand_1763.pdbqt	ZINC000003953037	azopt	-6.1	-6.3	-7.2	-6.53333	0.585947
fda_ligand_1764.pdbqt	ZINC000003964325	sunitinib	-6.3	-6.4	-5.9	-6.2	0.264575
fda_ligand_1765.pdbqt	ZINC000003976838	afatinib	-6.7	-6.8	-7.2	-6.9	0.264575
fda_ligand_1766.pdbqt	ZINC000003976838	afatinib	-6.8	-6.8	-7.1	-6.9	0.173205
fda_ligand_1767.pdbqt	ZINC000000001115	leukeran	-5.5	-5.3	-5.8	-5.53333	0.251661
fda_ligand_1768.pdbqt	ZINC000000057341	robaxin	-6.2	-6.5	-7.4	-6.7	0.6245
fda_ligand_1769.pdbqt	ZINC000000057062	mexiletine	-5.1	-5.2	-6	-5.43333	0.493288
fda_ligand_1770.pdbqt	ZINC000000057255	thalitone	-7.3	-8.1	-8.5	-7.96667	0.61101
fda_ligand_1771.pdbqt	ZINC000003926298	faslodex	-6	-5.5	-6.2	-5.9	0.360555
fda_ligand_1772.pdbqt	ZINC000003873296	oxistat	-6	-6.3	-7.3	-6.53333	0.680686
fda_ligand_1773.pdbqt	ZINC000003873296	oxistat	-5.8	-6.1	-7.6	-6.5	0.964365
fda_ligand_1774.pdbqt	ZINC000003875342	piperonyl butoxide	-4.7	-4.8	-5.2	-4.9	0.264575
fda_ligand_1775.pdbqt	ZINC000000403011	labetalol	-6.2	-6.3	-6.4	-6.3	0.1
fda_ligand_1776.pdbqt	ZINC000000403011	labetalol	-6.1	-6.3	-6.2	-6.2	0.1
fda_ligand_1777.pdbqt	ZINC000003830387	bcnu	-5	-5.1	-5.1	-5.06667	0.057735
fda_ligand_1778.pdbqt	ZINC000000113404	teldrin	-5.2	-5.1	-6.6	-5.63333	0.83865
fda_ligand_1779.pdbqt	ZINC000000113410	teldrin	-5.3	-5.4	-6.6	-5.76667	0.723418
fda_ligand_1780.pdbqt	ZINC000000000257	esmolol	-5.7	-5.6	-5.8	-5.7	0.1
fda_ligand_1781.pdbqt	ZINC000000113398	ibuprofen	-5.4	-5.2	-5.8	-5.46667	0.305505
fda_ligand_1782.pdbqt	ZINC000001850376	nix	-6.5	-6.2	-6.6	-6.43333	0.208167
fda_ligand_1783.pdbqt	ZINC000003925861	vorapaxar	-7.7	-7.7	-6.9	-7.43333	0.46188
fda_ligand_1784.pdbqt	ZINC000000968255	acebutolol	-6.1	-6	-6.2	-6.1	0.1
fda_ligand_1785.pdbqt	ZINC000000968303	propofol	-4.8	-4.9	-5	-4.9	0.1
fda_ligand_1786.pdbqt	ZINC000001843099	alfuzosin	-5.9	-5.8	-6.5	-6.06667	0.378594
fda_ligand_1787.pdbqt	ZINC000001843099	alfuzosin	-5.8	-5.8	-6.9	-6.16667	0.635085
fda_ligand_1788.pdbqt	ZINC000001843099	alfuzosin	-6.5	-6.1	-6.9	-6.5	0.4
fda_ligand_1789.pdbqt	ZINC000001851149	abilify	-6.5	-6.5	-6.5	-6.5	0
fda_ligand_1790.pdbqt	ZINC000001851149	abilify	-6.6	-6.2	-6.7	-6.5	0.264575
fda_ligand_1791.pdbqt	ZINC000000622123	gris-peg	-6.8	-6.8	-7.2	-6.93333	0.23094
fda_ligand_1792.pdbqt	ZINC000085540215	ioxilan	-5.3	-5.3	-5.7	-5.43333	0.23094
fda_ligand_1793.pdbqt	ZINC000085540219	ioxilan	-5.4	-5.4	-5.2	-5.33333	0.11547
fda_ligand_1794.pdbqt	ZINC000085540223	ioxilan	-5.6	-5.2	-5.7	-5.5	0.264575
fda_ligand_1795.pdbqt	ZINC000001319780	butrans	-6.3	-6.7	-6.3	-6.43333	0.23094
fda_ligand_1796.pdbqt	ZINC000001319780	butrans	-6.2	-6.5	-6.4	-6.36667	0.152753
fda_ligand_1797.pdbqt	ZINC000085555528	ZINC85555528	-6.2	-6.3	-6	-6.16667	0.152753
fda_ligand_1798.pdbqt	ZINC000085555528	ZINC85555528	-5.6	-5.5	-6	-5.7	0.264575
fda_ligand_1799.pdbqt	ZINC000085555528	ZINC85555528	-5.5	-5.7	-6.5	-5.9	0.52915
fda_ligand_1800.pdbqt	ZINC000085555528	ZINC85555528	-5.6	-5.5	-6.3	-5.8	0.43589
fda_ligand_1801.pdbqt	ZINC000001530625	thc	-6.3	-6.8	-6.5	-6.53333	0.251661
fda_ligand_1802.pdbqt	ZINC000014210876	eluxadoline	-8.7	-8.8	-8.6	-8.7	0.1
fda_ligand_1803.pdbqt	ZINC000014210876	eluxadoline	-8.7	-8.8	-8.6	-8.7	0.1
fda_ligand_1804.pdbqt	ZINC000000002043	rotoxamine	-5.2	-5.3	-6.8	-5.76667	0.896289
fda_ligand_1805.pdbqt	ZINC000000002043	rotoxamine	-5.2	-5.2	-6.8	-5.73333	0.92376
fda_ligand_1806.pdbqt	ZINC000000000607	pheniramine	-5.4	-5.5	-6.8	-5.9	0.781025
fda_ligand_1807.pdbqt	ZINC000000001982	probenecid	-5.9	-5.7	-6.5	-6.03333	0.416333
fda_ligand_1808.pdbqt	ZINC000043100709	trametinib	-8.3	-8.6	-7.1	-8	0.793725
fda_ligand_1809.pdbqt	ZINC000043100953	tedizolid phosphate	-7	-7.2	-7.3	-7.16667	0.152753
fda_ligand_1810.pdbqt	ZINC000043100953	tedizolid phosphate	-7.8	-7.8	-7.7	-7.76667	0.057735
fda_ligand_1811.pdbqt	ZINC000043100953	tedizolid phosphate	-7.6	-7.7	-7.5	-7.6	0.1
fda_ligand_1812.pdbqt	ZINC000084758479	brexpiprazole	-6.5	-6.6	-6.8	-6.63333	0.152753
fda_ligand_1813.pdbqt	ZINC000084758479	brexpiprazole	-6.8	-6.5	-7.1	-6.8	0.3
fda_ligand_1814.pdbqt	ZINC000084843283	lorzone	-6.4	-6.5	-6.5	-6.46667	0.057735
fda_ligand_1815.pdbqt	ZINC000000001850	olopatadine	-6.8	-6.5	-6.6	-6.63333	0.152753
fda_ligand_1816.pdbqt	ZINC000000020243	diflunisal	-7.1	-7.1	-7.1	-7.1	0
fda_ligand_1817.pdbqt	ZINC000000020245	tofranil	-6	-5.8	-6.7	-6.16667	0.472582
fda_ligand_1818.pdbqt	ZINC000000020248	clomipramine	-5.7	-5.4	-6.7	-5.93333	0.680686
fda_ligand_1819.pdbqt	ZINC000003813042	acetazolamide	-6.8	-7	-7.1	-6.96667	0.152753
fda_ligand_1820.pdbqt	ZINC000003830314	btc	-5.3	-5.3	-5.1	-5.23333	0.11547
fda_ligand_1821.pdbqt	ZINC000003831429	rimantadine	-5.7	-5.5	-6.2	-5.8	0.360555
fda_ligand_1822.pdbqt	ZINC000003831586	trimipramine	-5.8	-5.6	-6.2	-5.86667	0.305505
fda_ligand_1823.pdbqt	ZINC000003830990	keppra	-5.9	-5.8	-5.9	-5.86667	0.057735
fda_ligand_1824.pdbqt	ZINC000000643153	nizoral	-6.7	-6.8	-7	-6.83333	0.152753
fda_ligand_1825.pdbqt	ZINC000000643153	nizoral	-6.9	-6.6	-7.1	-6.86667	0.251661
fda_ligand_1826.pdbqt	ZINC000022447798	gadoversetamide	-5.6	-5.4	-6	-5.66667	0.305505
fda_ligand_1827.pdbqt	ZINC000022447798	gadoversetamide	-5.6	-5.5	-6.4	-5.83333	0.493288
fda_ligand_1828.pdbqt	ZINC000022448696	indinavir	-6.7	-6.6	-6.9	-6.73333	0.152753
fda_ligand_1829.pdbqt	ZINC000022448696	indinavir	-6.7	-7.4	-7.2	-7.1	0.360555
fda_ligand_1830.pdbqt	ZINC000022448696	indinavir	-7.3	-7.1	-7	-7.13333	0.152753
fda_ligand_1831.pdbqt	ZINC000022448696	indinavir	-7.1	-7.1	-7.1	-7.1	0
fda_ligand_1832.pdbqt	ZINC000022448696	indinavir	-6.8	-7.2	-7.3	-7.1	0.264575
fda_ligand_1833.pdbqt	ZINC000043202140	opsumit	-7.2	-7.2	-6.8	-7.06667	0.23094
fda_ligand_1834.pdbqt	ZINC000043202140	opsumit	-6.9	-6.8	-7.3	-7	0.264575
fda_ligand_1835.pdbqt	ZINC000043207851	ruxolitinib	-6.4	-6.9	-6.6	-6.63333	0.251661
fda_ligand_1836.pdbqt	ZINC000000000575	oxazepam	-6.6	-6.5	-8.1	-7.06667	0.896289
fda_ligand_1837.pdbqt	ZINC000000155269	orphenadrine	-5	-5.3	-6.4	-5.56667	0.737111
fda_ligand_1838.pdbqt	ZINC000000155269	orphenadrine	-5.2	-5.3	-6.4	-5.63333	0.665833
fda_ligand_1839.pdbqt	ZINC000000154964	mepivacaine	-5.6	-5.4	-6.1	-5.7	0.360555
fda_ligand_1840.pdbqt	ZINC000000154964	mepivacaine	-5.4	-5.4	-6	-5.6	0.34641
fda_ligand_1841.pdbqt	ZINC000000154964	mepivacaine	-5.6	-5.6	-6	-5.73333	0.23094
fda_ligand_1842.pdbqt	ZINC000000000215	diethylpropion	-5	-5.1	-5.9	-5.33333	0.493288
fda_ligand_1843.pdbqt	ZINC000000000215	diethylpropion	-5	-5	-5.9	-5.3	0.519615
fda_ligand_1844.pdbqt	ZINC000000000903	alprazolam	-6.7	-6.7	-6.7	-6.7	0
fda_ligand_1845.pdbqt	ZINC000001552174	pletal	-7.8	-7.9	-8	-7.9	0.1
fda_ligand_1846.pdbqt	ZINC000000000323	flurbiprofen	-5.9	-5.8	-6.6	-6.1	0.43589
fda_ligand_1847.pdbqt	ZINC000000001773	naltrexone	-7.1	-7	-7.5	-7.2	0.264575
fda_ligand_1848.pdbqt	ZINC000000001773	naltrexone	-7.3	-7.3	-8	-7.53333	0.404145
fda_ligand_1849.pdbqt	ZINC000000001773	naltrexone	-7	-7.1	-7.6	-7.23333	0.321455
fda_ligand_1850.pdbqt	ZINC000000008667	flurbiprofen	-5.9	-6	-7.3	-6.4	0.781025
fda_ligand_1851.pdbqt	ZINC000000018087	almotriptan	-5.8	-6.1	-6.9	-6.26667	0.568624
fda_ligand_1852.pdbqt	ZINC000022443609	plerixafor	-6.3	-5.8	-6	-6.03333	0.251661
fda_ligand_1853.pdbqt	ZINC000043200832	edoxaban	-6.9	-6.7	-6.8	-6.8	0.1
fda_ligand_1854.pdbqt	ZINC000043200832	edoxaban	-6.9	-7.2	-6.9	-7	0.173205
fda_ligand_1855.pdbqt	ZINC000043200832	edoxaban	-6.8	-6.8	-6.9	-6.83333	0.057735
fda_ligand_1856.pdbqt	ZINC000043207238	canagliflozin	-7.6	-7.9	-7.7	-7.73333	0.152753
fda_ligand_1857.pdbqt	ZINC000001543475	tdf	-8.2	-7.8	-8.1	-8.03333	0.208167
fda_ligand_1858.pdbqt	ZINC000001543475	tdf	-8.3	-7.7	-7.8	-7.93333	0.321455
fda_ligand_1859.pdbqt	ZINC000001543475	tdf	-6.6	-7.8	-7.3	-7.23333	0.602771
fda_ligand_1860.pdbqt	ZINC000001543916	valganciclovir	-6.4	-6.5	-7.2	-6.7	0.43589
fda_ligand_1861.pdbqt	ZINC000001543916	valganciclovir	-6.9	-6.9	-7.5	-7.1	0.34641
fda_ligand_1862.pdbqt	ZINC000001548097	fanapt	-6.1	-6.7	-6.3	-6.36667	0.305505
fda_ligand_1863.pdbqt	ZINC000001548097	fanapt	-5.9	-6	-6.2	-6.03333	0.152753
fda_ligand_1864.pdbqt	ZINC000001550499	cinacalcet	-5.9	-5.4	-6.2	-5.83333	0.404145
fda_ligand_1865.pdbqt	ZINC000000967566	antiseptic	-5.5	-5.7	-5.7	-5.63333	0.11547
fda_ligand_1866.pdbqt	ZINC000000967597	thymol	-5.2	-5	-5.1	-5.1	0.1
fda_ligand_1867.pdbqt	ZINC000000967521	ZINC967521	-5.3	-5.3	-5.6	-5.4	0.173205
fda_ligand_1868.pdbqt	ZINC000019144231	chloroquine	-5.1	-5.1	-5.6	-5.26667	0.288675
fda_ligand_1869.pdbqt	ZINC000019144231	chloroquine	-4.9	-5.5	-5.5	-5.3	0.34641
fda_ligand_1870.pdbqt	ZINC000001883067	trinitrophenol	-7.2	-7	-7	-7.06667	0.11547
fda_ligand_1871.pdbqt	ZINC000000006226	ferriprox	-5.1	-5.1	-5.4	-5.2	0.173205
fda_ligand_1872.pdbqt	ZINC000000105216	naproxen	-6.8	-6.8	-7.2	-6.93333	0.23094
fda_ligand_1873.pdbqt	ZINC000000137884	stavudine	-6.3	-6.5	-6.8	-6.53333	0.251661
fda_ligand_1874.pdbqt	ZINC000000621893	diltiazem	-6.8	-7.1	-7.3	-7.06667	0.251661
fda_ligand_1875.pdbqt	ZINC000000621893	diltiazem	-6.3	-6.7	-6.8	-6.6	0.264575
fda_ligand_1876.pdbqt	ZINC000000897244	sulbactam	-6.3	-6.4	-6.6	-6.43333	0.152753
fda_ligand_1877.pdbqt	ZINC000001035331	ribasphere	-7.7	-7.7	-7.9	-7.76667	0.11547
fda_ligand_1878.pdbqt	ZINC000001530788	cromolyn	-7.4	-7.4	-8.1	-7.63333	0.404145
fda_ligand_1879.pdbqt	ZINC000001542002	fingolimod	-4.9	-4.9	-5	-4.93333	0.057735
fda_ligand_1880.pdbqt	ZINC000003787060	tazobactam	-7.6	-7.7	-7.7	-7.66667	0.057735
fda_ligand_1881.pdbqt	ZINC000003795819	palonosetron	-7	-7	-6.9	-6.96667	0.057735
fda_ligand_1882.pdbqt	ZINC000003795819	palonosetron	-7	-7	-6.8	-6.93333	0.11547
fda_ligand_1883.pdbqt	ZINC000003814422	android	-6.8	-6.8	-6.8	-6.8	0
fda_ligand_1884.pdbqt	ZINC000003830321	bisacodyl	-6.9	-6.2	-6.7	-6.6	0.360555
fda_ligand_1885.pdbqt	ZINC000003830405	cefazolin	-7.4	-7.5	-7.5	-7.46667	0.057735
fda_ligand_1886.pdbqt	ZINC000003833821	prdl	-7.3	-7.7	-7.3	-7.43333	0.23094
fda_ligand_1887.pdbqt	ZINC000003861599	aldactone	-7.2	-7.3	-7	-7.16667	0.152753
fda_ligand_1888.pdbqt	ZINC000003875439	oxacillin	-6.8	-6.9	-8.4	-7.36667	0.896289
fda_ligand_1889.pdbqt	ZINC000003881640	megace	-7.2	-7.2	-7.5	-7.3	0.173205
fda_ligand_1890.pdbqt	ZINC000003913937	piperacillin	-7.3	-7.2	-7.1	-7.2	0.1
fda_ligand_1891.pdbqt	ZINC000003917708	daunorubicin	-7	-6.9	-7.5	-7.13333	0.321455
fda_ligand_1892.pdbqt	ZINC000003920266	idarubicin	-7.5	-7.3	-7.7	-7.5	0.2
fda_ligand_1893.pdbqt	ZINC000003920266	idarubicin	-7.7	-7.5	-7.8	-7.66667	0.152753
fda_ligand_1894.pdbqt	ZINC000003938744	beclometasone	-6.9	-6.7	-7.4	-7	0.360555
fda_ligand_1895.pdbqt	ZINC000003978006	dicloxacillin	-7.3	-7.4	-7.2	-7.3	0.1
fda_ligand_1896.pdbqt	ZINC000003982483	lincomycin	-6.2	-6.2	-6.1	-6.16667	0.057735
fda_ligand_1897.pdbqt	ZINC000003982483	lincomycin	-6.2	-6.2	-6.9	-6.43333	0.404145
fda_ligand_1898.pdbqt	ZINC000003982483	lincomycin	-6.3	-6.4	-6.2	-6.3	0.1
fda_ligand_1899.pdbqt	ZINC000004468780	cefotaxime	-8	-8.2	-8.1	-8.1	0.1
fda_ligand_1900.pdbqt	ZINC000016052277	doxycycline	-7.9	-8.2	-8.6	-8.23333	0.351188
fda_ligand_1901.pdbqt	ZINC000016052277	doxycycline	-7.9	-8.1	-8.7	-8.23333	0.416333
fda_ligand_1902.pdbqt	ZINC000016052277	doxycycline	-7.5	-8	-8.5	-8	0.5
fda_ligand_1903.pdbqt	ZINC000016052277	doxycycline	-7.7	-8	-8.4	-8.03333	0.351188
fda_ligand_1904.pdbqt	ZINC000019632628	seroquel	-7	-7	-6.7	-6.9	0.173205
fda_ligand_1905.pdbqt	ZINC000019632628	seroquel	-7	-7	-6.8	-6.93333	0.11547
fda_ligand_1906.pdbqt	ZINC000019875504	rasagiline	-5.7	-5.7	-5.8	-5.73333	0.057735
fda_ligand_1907.pdbqt	ZINC000019875504	rasagiline	-5.7	-5.7	-5.7	-5.7	0
fda_ligand_1908.pdbqt	ZINC000028467879	ceftriaxone	-7	-7.5	-8.1	-7.53333	0.550757
fda_ligand_1909.pdbqt	ZINC000028467879	ceftriaxone	-7	-7	-8.1	-7.36667	0.635085
fda_ligand_1910.pdbqt	ZINC000043450326	synribo	-6	-6.6	-8.1	-6.9	1.08167
fda_ligand_1911.pdbqt	ZINC000043450326	synribo	-6.2	-6.2	-7.4	-6.6	0.69282
fda_ligand_1912.pdbqt	ZINC000049933061	dronedarone	-5	-5.6	-5.8	-5.46667	0.416333
fda_ligand_1913.pdbqt	ZINC000084441937	tetracycline	-7.7	-8	-8.3	-8	0.3
fda_ligand_1914.pdbqt	ZINC000084441937	tetracycline	-7.8	-7.9	-8.6	-8.1	0.43589
fda_ligand_1915.pdbqt	ZINC000084441937	tetracycline	-7.7	-8	-8.7	-8.13333	0.51316
fda_ligand_1916.pdbqt	ZINC000084589076	rax	-6.5	-6.7	-8.2	-7.13333	0.929157
fda_ligand_1917.pdbqt	ZINC000085432544	vinblastine	-5.8	-6.9	-6.1	-6.26667	0.568624
fda_ligand_1918.pdbqt	ZINC000085432544	vinblastine	-6.7	-5.9	-5.4	-6	0.655744
fda_ligand_1919.pdbqt	ZINC000085432544	vinblastine	-6.2	-6.4	-6	-6.2	0.2
fda_ligand_1920.pdbqt	ZINC000085432544	vinblastine	-5.8	-6.1	-6.1	-6	0.173205
fda_ligand_1921.pdbqt	ZINC000096903163	ZINC96903163	-6.4	-6.6	-7.2	-6.73333	0.416333
fda_ligand_1922.pdbqt	ZINC000100006264	rax	-6.9	-7.2	-7.7	-7.26667	0.404145
fda_ligand_1923.pdbqt	ZINC000100071256	ZINC100071256	-5.6	-5.6	-5.5	-5.56667	0.057735
fda_ligand_1924.pdbqt	ZINC000043450324	synribo	-6.2	-6.8	-8	-7	0.916515
fda_ligand_1925.pdbqt	ZINC000043450324	synribo	-6.7	-6.6	-7.9	-7.06667	0.723418
fda_ligand_1926.pdbqt	ZINC000000968301	cuvposa	-5.8	-5.7	-5.9	-5.8	0.1
fda_ligand_1927.pdbqt	ZINC000003940470	pomalyst	-6.9	-6.8	-7.6	-7.1	0.43589
fda_ligand_1928.pdbqt	ZINC000043195697	valbenazine	-6	-6.1	-6	-6.03333	0.057735
fda_ligand_1929.pdbqt	ZINC000043195697	valbenazine	-5.9	-6.1	-5.9	-5.96667	0.11547
fda_ligand_1930.pdbqt	ZINC000043195697	valbenazine	-6.1	-6.1	-6	-6.06667	0.057735
fda_ligand_1931.pdbqt	ZINC000043195697	valbenazine	-6.4	-6.3	-6.2	-6.3	0.1
fda_ligand_1932.pdbqt	ZINC000043195697	valbenazine	-6.2	-6	-6	-6.06667	0.11547
fda_ligand_1933.pdbqt	ZINC000072316335	ZINC72316335	-6.1	-6.3	-6.2	-6.2	0.1
fda_ligand_1934.pdbqt	ZINC000072316335	ZINC72316335	-6.4	-6.5	-6.2	-6.36667	0.152753
fda_ligand_1935.pdbqt	ZINC000096272772	ceritinib	-6.8	-7.3	-6.7	-6.93333	0.321455
fda_ligand_1936.pdbqt	ZINC000098023177	ZINC98023177	-6.8	-6.8	-7	-6.86667	0.11547
fda_ligand_1937.pdbqt	ZINC000098023177	ZINC98023177	-6.9	-6.6	-7.1	-6.86667	0.251661
fda_ligand_1938.pdbqt	ZINC000085205451	ZINC85205451	-6.3	-6.5	-6.8	-6.53333	0.251661
fda_ligand_1939.pdbqt	ZINC000095616937	dasabuvir	-7.4	-7	-7.7	-7.36667	0.351188
fda_ligand_1940.pdbqt	ZINC000252678020	ZINC252678020	-5.5	-5.7	-6	-5.73333	0.251661
fda_ligand_1941.pdbqt	ZINC000252678020	ZINC252678020	-5.8	-6.3	-6.7	-6.26667	0.450925
fda_ligand_1942.pdbqt	ZINC000000000347	granisetron	-6.8	-6.8	-6.7	-6.76667	0.057735
fda_ligand_1943.pdbqt	ZINC000000000347	granisetron	-6.7	-6.8	-6.8	-6.76667	0.057735
fda_ligand_1944.pdbqt	ZINC000000000347	granisetron	-6.8	-6.8	-6.7	-6.76667	0.057735
fda_ligand_1945.pdbqt	ZINC000000000711	secnidazole	-5.6	-5.7	-5.8	-5.7	0.1
fda_ligand_1946.pdbqt	ZINC000000001132	chloroxylenol	-5.2	-5.4	-5.4	-5.33333	0.11547
fda_ligand_1947.pdbqt	ZINC000000001931	phenyltoloxamine	-5.3	-5.8	-6.6	-5.9	0.655744
fda_ligand_1948.pdbqt	ZINC000000001931	phenyltoloxamine	-5.3	-5.4	-6.4	-5.7	0.608276
fda_ligand_1949.pdbqt	ZINC000000001984	fenofibric acid	-6.2	-6.2	-6.5	-6.3	0.173205
fda_ligand_1950.pdbqt	ZINC000000002688	anzemet	-7	-7.1	-7.5	-7.2	0.264575
fda_ligand_1951.pdbqt	ZINC000000057513	thonzylamine	-5.4	-5.9	-7.1	-6.13333	0.873689
fda_ligand_1952.pdbqt	ZINC000000057513	thonzylamine	-5.1	-6.1	-6.9	-6.03333	0.90185
fda_ligand_1953.pdbqt	ZINC000000097996	pyrantel	-4.7	-4.8	-5.4	-4.96667	0.378594
fda_ligand_1954.pdbqt	ZINC000000121480	triclocarban	-5.8	-5.7	-5.9	-5.8	0.1
fda_ligand_1955.pdbqt	ZINC000001530929	methohexital	-6.3	-6.5	-6.8	-6.53333	0.251661
fda_ligand_1956.pdbqt	ZINC000001530929	methohexital	-6.3	-6.5	-6.8	-6.53333	0.251661
fda_ligand_1957.pdbqt	ZINC000001530930	methohexital	-6.6	-6.6	-6.7	-6.63333	0.057735
fda_ligand_1958.pdbqt	ZINC000001530930	methohexital	-6.6	-6.7	-6.9	-6.73333	0.152753
fda_ligand_1959.pdbqt	ZINC000001530938	chloroprocaine	-5.3	-5.5	-5.8	-5.53333	0.251661
fda_ligand_1960.pdbqt	ZINC000001530938	chloroprocaine	-5.2	-5.5	-5.5	-5.4	0.173205
fda_ligand_1961.pdbqt	ZINC000001540998	ZINC1540998	-7.8	-8	-7.8	-7.86667	0.11547
fda_ligand_1962.pdbqt	ZINC000001571009	benzethonium	-4.9	-6.1	-4.4	-5.13333	0.873689
fda_ligand_1963.pdbqt	ZINC000100005670	pamabrom	-6.6	-6.8	-6.8	-6.73333	0.11547
fda_ligand_1964.pdbqt	ZINC000100017856	mepron	-7.2	-7.3	-6.8	-7.1	0.264575
fda_ligand_1965.pdbqt	ZINC000100017856	mepron	-6.3	-7.2	-7.4	-6.96667	0.585947
fda_ligand_1966.pdbqt	ZINC000001690324	sulisobenzone	-6.3	-6.3	-7.4	-6.66667	0.635085
fda_ligand_1967.pdbqt	ZINC000001690324	sulisobenzone	-6.3	-6.3	-7	-6.53333	0.404145
fda_ligand_1968.pdbqt	ZINC000001698306	ZINC1698306	-6.5	-6.6	-6.5	-6.53333	0.057735
fda_ligand_1969.pdbqt	ZINC000001843047	secnidazole	-6	-6.1	-6	-6.03333	0.057735
fda_ligand_1970.pdbqt	ZINC000100299039	ZINC100299039	-5	-4.9	-5	-4.96667	0.057735
fda_ligand_1971.pdbqt	ZINC000002008310	ZINC2008310	-6.3	-6	-6	-6.1	0.173205
fda_ligand_1972.pdbqt	ZINC000002015035	l-dops	-6.2	-6.3	-7.2	-6.56667	0.550757
fda_ligand_1973.pdbqt	ZINC000002015035	l-dops	-6.5	-6.4	-7.2	-6.7	0.43589
fda_ligand_1974.pdbqt	ZINC000002016257	padimate o	-5.5	-4.7	-5.5	-5.23333	0.46188
fda_ligand_1975.pdbqt	ZINC000002016258	padimate o	-4.9	-5.4	-5.7	-5.33333	0.404145
fda_ligand_1976.pdbqt	ZINC000101489663	ZINC101489663	-6	-6.3	-6.8	-6.36667	0.404145
fda_ligand_1977.pdbqt	ZINC000003827556	delafloxacin	-8.2	-8.4	-8.2	-8.26667	0.11547
fda_ligand_1978.pdbqt	ZINC000003831474	dmsa	-4.9	-4.9	-4.8	-4.86667	0.057735
fda_ligand_1979.pdbqt	ZINC000003831477	dmsa	-5.1	-5	-4.9	-5	0.1
fda_ligand_1980.pdbqt	ZINC000003874185	mefloquine	-7.3	-7.3	-7.5	-7.36667	0.11547
fda_ligand_1981.pdbqt	ZINC000003876068	methohexital	-6.6	-6.5	-6.8	-6.63333	0.152753
fda_ligand_1982.pdbqt	ZINC000003876068	methohexital	-6.2	-6.4	-6.6	-6.4	0.2
fda_ligand_1983.pdbqt	ZINC000003876069	methohexital	-6.9	-6.7	-6.8	-6.8	0.1
fda_ligand_1984.pdbqt	ZINC000003876069	methohexital	-6.7	-6.6	-6.8	-6.7	0.1
fda_ligand_1985.pdbqt	ZINC000003916214	neratinib	-6.2	-6.4	-6.8	-6.46667	0.305505
fda_ligand_1986.pdbqt	ZINC000003916214	neratinib	-6.2	-6.1	-6.8	-6.36667	0.378594
fda_ligand_1987.pdbqt	ZINC000003938652	dermatop	-7.4	-7.7	-7.7	-7.6	0.173205
fda_ligand_1988.pdbqt	ZINC000003945984	vexol	-6.9	-7.2	-7.1	-7.06667	0.152753
fda_ligand_1989.pdbqt	ZINC000003972949	ioflupane	-6.1	-6.1	-6.1	-6.1	0
fda_ligand_1990.pdbqt	ZINC000003972949	ioflupane	-5.7	-5.8	-6	-5.83333	0.152753
fda_ligand_1991.pdbqt	ZINC000004097304	ZINC4097304	-7.3	-7	-7.7	-7.33333	0.351188
fda_ligand_1992.pdbqt	ZINC000004097467	megestrol	-7.3	-7.4	-7.5	-7.4	0.1
fda_ligand_1993.pdbqt	ZINC000006467621	ensulizole	-6.3	-6.5	-7	-6.6	0.360555
fda_ligand_1994.pdbqt	ZINC000006845963	cetylpyridinium	-4.1	-3.8	-3.7	-3.86667	0.208167
fda_ligand_1995.pdbqt	ZINC000007997966	ZINC7997966	-6.5	-6.4	-6.6	-6.5	0.1
fda_ligand_1996.pdbqt	ZINC000007997966	ZINC7997966	-6.4	-6.4	-6.6	-6.46667	0.11547
fda_ligand_1997.pdbqt	ZINC000008214418	ioxilan	-5	-5.4	-5.3	-5.23333	0.208167
fda_ligand_1998.pdbqt	ZINC000008214629	n-9	-4.6	-5	-5.5	-5.03333	0.450925
fda_ligand_1999.pdbqt	ZINC000021981454	cloderm	-7.3	-7.2	-7.9	-7.46667	0.378594
[truncated: 116 more rows]

## Sheet: energy_average_arg2_structures
LIGAND_NAME	ZINC_ID	Drug_name	4hze	4i06	4ixu	Average	Standard_deviation
fda_ligand_1237.pdbqt	ZINC000003978005	dihydroergotamine	-8.6	-9.5	-9.6	-9.23333	0.550757
fda_ligand_1236.pdbqt	ZINC000003978005	dihydroergotamine	-8.4	-9.5	-9.6	-9.16667	0.665833
fda_ligand_1238.pdbqt	ZINC000003978005	dihydroergotamine	-8.4	-9.6	-9.4	-9.13333	0.64291
fda_ligand_2092.pdbqt	ZINC000049783788	valrubicin	-9.1	-8.8	-9.3	-9.06667	0.251661
fda_ligand_1666.pdbqt	ZINC000169289767	trypan blue	-8.2	-8.8	-10.1	-9.03333	0.971253
fda_ligand_1202.pdbqt	ZINC000064033452	lumacaftor	-8.9	-8.9	-9.1	-8.96667	0.11547
fda_ligand_1686.pdbqt	ZINC000003807172	argatroban	-8.8	-9.1	-9	-8.96667	0.152753
fda_ligand_0366.pdbqt	ZINC000006745272	stivarga	-9.2	-8.5	-9	-8.9	0.360555
fda_ligand_0131.pdbqt	ZINC000052955754	ergotamine	-8.5	-9.1	-9	-8.86667	0.321455
fda_ligand_0132.pdbqt	ZINC000052955754	ergotamine	-8.5	-9.1	-9	-8.86667	0.321455
fda_ligand_1496.pdbqt	ZINC000003927870	fludarabine	-8.7	-9	-8.9	-8.86667	0.152753
fda_ligand_0945.pdbqt	ZINC000004097286	budesonide	-8.8	-8.9	-8.8	-8.83333	0.057735
fda_ligand_2063.pdbqt	ZINC000003782818	atacand	-8.7	-8.9	-8.9	-8.83333	0.11547
fda_ligand_2064.pdbqt	ZINC000003782818	atacand	-8.8	-8.9	-8.8	-8.83333	0.057735
fda_ligand_1495.pdbqt	ZINC000003927870	fludarabine	-8.7	-9	-8.7	-8.8	0.173205
fda_ligand_1925.pdbqt	ZINC000043450324	synribo	-8.5	-9	-8.9	-8.8	0.264575
fda_ligand_0515.pdbqt	ZINC000043206370	niraparib	-8.7	-8.8	-8.8	-8.76667	0.057735
fda_ligand_0547.pdbqt	ZINC000003872931	avapro	-8.7	-8.9	-8.7	-8.76667	0.11547
fda_ligand_0548.pdbqt	ZINC000003872931	avapro	-8.7	-8.9	-8.7	-8.76667	0.11547
fda_ligand_1760.pdbqt	ZINC000003938751	budesonide	-8.6	-8.9	-8.8	-8.76667	0.152753
fda_ligand_0085.pdbqt	ZINC000004212809	deflazacort	-8.5	-8.9	-8.8	-8.73333	0.208167
fda_ligand_0729.pdbqt	ZINC000013831130	raltegravir	-8.6	-8.6	-8.9	-8.7	0.173205
fda_ligand_0730.pdbqt	ZINC000013831130	raltegravir	-8.6	-8.8	-8.7	-8.7	0.1
fda_ligand_0330.pdbqt	ZINC000001542113	vilazodone	-8.4	-8.7	-8.9	-8.66667	0.251661
fda_ligand_1190.pdbqt	ZINC000053683151	bromocriptine	-8.6	-8.6	-8.8	-8.66667	0.11547
fda_ligand_1280.pdbqt	ZINC000003993855	cialis	-8.7	-8.6	-8.7	-8.66667	0.057735
fda_ligand_1902.pdbqt	ZINC000016052277	doxycycline	-8.9	-8.6	-8.5	-8.66667	0.208167
fda_ligand_2098.pdbqt	ZINC000164528615	ZINC164528615	-8.7	-8.6	-8.7	-8.66667	0.057735
fda_ligand_0416.pdbqt	ZINC000003977978	fluocinonide	-8.4	-8.6	-8.9	-8.63333	0.251661
fda_ligand_2091.pdbqt	ZINC000049783788	valrubicin	-8.6	-8.4	-8.9	-8.63333	0.251661
fda_ligand_0024.pdbqt	ZINC000002005305	5-methyltetrahydrofolate	-8.3	-8.7	-8.8	-8.6	0.264575
fda_ligand_0025.pdbqt	ZINC000003861806	podofilox	-8.3	-8.7	-8.8	-8.6	0.264575
fda_ligand_1351.pdbqt	ZINC000009212427	leucal	-8.6	-8.2	-9	-8.6	0.4
fda_ligand_1353.pdbqt	ZINC000009212427	leucal	-8.9	-8.1	-8.8	-8.6	0.43589
fda_ligand_1802.pdbqt	ZINC000014210876	eluxadoline	-8.8	-8.6	-8.4	-8.6	0.2
fda_ligand_0023.pdbqt	ZINC000002005305	5-methyltetrahydrofolate	-8.2	-8.8	-8.7	-8.56667	0.321455
fda_ligand_1178.pdbqt	ZINC000000403533	oxycodone	-8.3	-8.7	-8.7	-8.56667	0.23094
fda_ligand_1803.pdbqt	ZINC000014210876	eluxadoline	-8.5	-8.7	-8.5	-8.56667	0.11547
fda_ligand_0175.pdbqt	ZINC000028232750	valstar	-8.5	-8.3	-8.8	-8.53333	0.251661
fda_ligand_0185.pdbqt	ZINC000003818726	belinostat	-8.4	-8.7	-8.5	-8.53333	0.152753
fda_ligand_0186.pdbqt	ZINC000003818726	belinostat	-8.4	-8.7	-8.5	-8.53333	0.152753
fda_ligand_1191.pdbqt	ZINC000053683151	bromocriptine	-8.5	-8.7	-8.4	-8.53333	0.152753
fda_ligand_1755.pdbqt	ZINC000003932831	avodart	-8.6	-8.1	-8.9	-8.53333	0.404145
fda_ligand_1900.pdbqt	ZINC000016052277	doxycycline	-8.5	-8.5	-8.6	-8.53333	0.057735
fda_ligand_1901.pdbqt	ZINC000016052277	doxycycline	-8.5	-8.5	-8.6	-8.53333	0.057735
fda_ligand_0331.pdbqt	ZINC000001542113	vilazodone	-8.4	-8.6	-8.5	-8.5	0.1
fda_ligand_1857.pdbqt	ZINC000001543475	tdf	-8	-8.8	-8.7	-8.5	0.43589
fda_ligand_0470.pdbqt	ZINC000011679756	eltrombopag	-8.4	-8.5	-8.5	-8.46667	0.057735
fda_ligand_1880.pdbqt	ZINC000003787060	tazobactam	-8	-8.6	-8.8	-8.46667	0.416333
fda_ligand_1893.pdbqt	ZINC000003920266	idarubicin	-8.3	-8.4	-8.6	-8.43333	0.152753
fda_ligand_0022.pdbqt	ZINC000002005305	5-methyltetrahydrofolate	-8.4	-8.4	-8.5	-8.43333	0.057735
fda_ligand_0872.pdbqt	ZINC000006716957	nilotinib	-8.3	-8.5	-8.5	-8.43333	0.11547
fda_ligand_1352.pdbqt	ZINC000009212427	leucal	-8.3	-8.3	-8.7	-8.43333	0.23094
fda_ligand_0322.pdbqt	ZINC000004468778	cefixime	-8.2	-8.3	-8.7	-8.4	0.264575
fda_ligand_0550.pdbqt	ZINC000003875483	opana	-8.1	-8.6	-8.5	-8.4	0.264575
fda_ligand_0785.pdbqt	ZINC000014210642	edarbi	-8.1	-8.6	-8.5	-8.4	0.264575
fda_ligand_1878.pdbqt	ZINC000001530788	cromolyn	-7.8	-8.9	-8.5	-8.4	0.556776
fda_ligand_1908.pdbqt	ZINC000028467879	ceftriaxone	-8.1	-8.4	-8.6	-8.36667	0.251661
fda_ligand_1808.pdbqt	ZINC000043100709	trametinib	-8.8	-8.1	-8.2	-8.36667	0.378594
fda_ligand_0469.pdbqt	ZINC000011679756	eltrombopag	-8.2	-8.4	-8.4	-8.33333	0.11547
fda_ligand_0786.pdbqt	ZINC000014210642	edarbi	-8.4	-8	-8.6	-8.33333	0.305505
fda_ligand_0994.pdbqt	ZINC000004099009	vumon	-8.3	-8.4	-8.3	-8.33333	0.057735
fda_ligand_1396.pdbqt	ZINC000003871967	cedax	-7.9	-8.5	-8.6	-8.33333	0.378594
fda_ligand_1680.pdbqt	ZINC000003938684	toposar	-8.3	-8.4	-8.3	-8.33333	0.057735
fda_ligand_1909.pdbqt	ZINC000028467879	ceftriaxone	-8	-8.4	-8.6	-8.33333	0.305505
fda_ligand_2020.pdbqt	ZINC000004099008	vumon	-8.2	-8.4	-8.4	-8.33333	0.11547
fda_ligand_0568.pdbqt	ZINC000012503187	conivaptan	-8.1	-8.2	-8.7	-8.33333	0.321455
fda_ligand_0010.pdbqt	ZINC000001612996	irinotecan	-8.2	-8.7	-8	-8.3	0.360555
fda_ligand_0098.pdbqt	ZINC000003927200	yaz	-8.3	-8.1	-8.5	-8.3	0.2
fda_ligand_1216.pdbqt	ZINC000004097427	candesartan	-8.2	-8.3	-8.4	-8.3	0.1
fda_ligand_1903.pdbqt	ZINC000016052277	doxycycline	-8.3	-8.2	-8.4	-8.3	0.1
fda_ligand_0176.pdbqt	ZINC000028232750	valstar	-8.4	-8.4	-8	-8.26667	0.23094
fda_ligand_0413.pdbqt	ZINC000001280665	hydrocodone	-8.1	-8.4	-8.3	-8.26667	0.152753
fda_ligand_1528.pdbqt	ZINC000001530636	famotidine	-8.1	-8.4	-8.3	-8.26667	0.152753
fda_ligand_1811.pdbqt	ZINC000043100953	tedizolid phosphate	-7.9	-8.4	-8.5	-8.26667	0.321455
fda_ligand_1911.pdbqt	ZINC000043450326	synribo	-8.1	-8.4	-8.3	-8.26667	0.152753
fda_ligand_1914.pdbqt	ZINC000084441937	tetracycline	-8.2	-8.4	-8.2	-8.26667	0.11547
fda_ligand_2090.pdbqt	ZINC000049783788	valrubicin	-8.3	-7.7	-8.8	-8.26667	0.550757
fda_ligand_1527.pdbqt	ZINC000001530636	famotidine	-8.1	-8.3	-8.4	-8.26667	0.152753
fda_ligand_1844.pdbqt	ZINC000000000903	alprazolam	-8.1	-8.3	-8.4	-8.26667	0.152753
fda_ligand_0276.pdbqt	ZINC000169621220	ZINC169621220	-8	-8.6	-8.1	-8.23333	0.321455
fda_ligand_0406.pdbqt	ZINC000001530886	ZINC1530886	-8	-8.3	-8.4	-8.23333	0.208167
fda_ligand_0539.pdbqt	ZINC000116473771	ZINC116473771	-8.2	-8.4	-8.1	-8.23333	0.152753
fda_ligand_1170.pdbqt	ZINC000000896918	daranide	-8	-8.3	-8.4	-8.23333	0.208167
fda_ligand_1215.pdbqt	ZINC000004074875	candesartan	-8	-8.3	-8.4	-8.23333	0.208167
fda_ligand_1899.pdbqt	ZINC000004468780	cefotaxime	-8.4	-8.3	-8	-8.23333	0.208167
fda_ligand_0130.pdbqt	ZINC000052955754	ergotamine	-8.1	-8.3	-8.3	-8.23333	0.11547
fda_ligand_0213.pdbqt	ZINC000068153186	dabrafenib	-8.1	-8.3	-8.3	-8.23333	0.11547
fda_ligand_0483.pdbqt	ZINC000011617039	pazopanib	-8.1	-8.3	-8.3	-8.23333	0.11547
fda_ligand_1179.pdbqt	ZINC000000403533	oxycodone	-8	-8.4	-8.3	-8.23333	0.208167
fda_ligand_1214.pdbqt	ZINC000004074875	candesartan	-8.5	-8.2	-8	-8.23333	0.251661
fda_ligand_1217.pdbqt	ZINC000004097427	candesartan	-8.2	-8.2	-8.3	-8.23333	0.057735
fda_ligand_1494.pdbqt	ZINC000003927870	fludarabine	-8.1	-8.3	-8.3	-8.23333	0.11547
fda_ligand_1892.pdbqt	ZINC000003920266	idarubicin	-8.1	-8.2	-8.4	-8.23333	0.152753
fda_ligand_0270.pdbqt	ZINC000009212428	leucal	-8.1	-8.4	-8.1	-8.2	0.173205
fda_ligand_1721.pdbqt	ZINC000003872738	guanfacine	-8.2	-8.3	-8.1	-8.2	0.1
fda_ligand_0817.pdbqt	ZINC000000007295	eslicarbazepine acetate	-8.1	-8.2	-8.3	-8.2	0.1
fda_ligand_0943.pdbqt	ZINC000000538550	ziprasidone	-8.2	-8.2	-8.2	-8.2	0
fda_ligand_0946.pdbqt	ZINC000004097305	flunisolide	-8.1	-8.2	-8.3	-8.2	0.1
fda_ligand_1200.pdbqt	ZINC000058581064	dolutegravir	-8.1	-8.2	-8.3	-8.2	0.1
fda_ligand_1458.pdbqt	ZINC000003873160	losartan	-8.2	-8.2	-8.2	-8.2	0
fda_ligand_0214.pdbqt	ZINC000068153186	dabrafenib	-8	-8.3	-8.2	-8.16667	0.152753
fda_ligand_0949.pdbqt	ZINC000004175630	orap	-8.1	-8	-8.4	-8.16667	0.208167
fda_ligand_1014.pdbqt	ZINC000003977981	capex	-8.1	-8.2	-8.2	-8.16667	0.057735
fda_ligand_1063.pdbqt	ZINC000004228258	kuvan	-8	-8.1	-8.4	-8.16667	0.208167
fda_ligand_1122.pdbqt	ZINC000001530922	fosphenytoin	-8	-8.1	-8.4	-8.16667	0.208167
fda_ligand_1387.pdbqt	ZINC000003874715	wartec	-8.1	-8.2	-8.2	-8.16667	0.057735
fda_ligand_1457.pdbqt	ZINC000003873160	losartan	-8.2	-8.2	-8.1	-8.16667	0.057735
fda_ligand_1574.pdbqt	ZINC000007997568	macrobid	-7.8	-8.2	-8.5	-8.16667	0.351188
fda_ligand_1703.pdbqt	ZINC000003830449	cefoxitin	-8.3	-8.2	-8	-8.16667	0.152753
fda_ligand_1845.pdbqt	ZINC000001552174	pletal	-8.2	-8.3	-8	-8.16667	0.152753
fda_ligand_1913.pdbqt	ZINC000084441937	tetracycline	-8	-8.2	-8.3	-8.16667	0.152753
fda_ligand_1915.pdbqt	ZINC000084441937	tetracycline	-8	-8.2	-8.3	-8.16667	0.152753
fda_ligand_1924.pdbqt	ZINC000043450324	synribo	-7.8	-8.6	-8.1	-8.16667	0.404145
fda_ligand_2065.pdbqt	ZINC000003816292	lenvatinib	-8.1	-8.3	-8.1	-8.16667	0.11547
fda_ligand_0321.pdbqt	ZINC000000601301	bhft	-8	-8.1	-8.3	-8.13333	0.152753
fda_ligand_0871.pdbqt	ZINC000006716957	nilotinib	-8	-8.1	-8.3	-8.13333	0.152753
fda_ligand_0569.pdbqt	ZINC000012503187	conivaptan	-8	-7.8	-8.6	-8.13333	0.416333
fda_ligand_0942.pdbqt	ZINC000000538550	ziprasidone	-8.1	-7.7	-8.6	-8.13333	0.450925
fda_ligand_0950.pdbqt	ZINC000004175630	orap	-8.1	-7.9	-8.4	-8.13333	0.251661
fda_ligand_2022.pdbqt	ZINC000009164421	ceftolozane	-7.7	-8.2	-8.5	-8.13333	0.404145
fda_ligand_0967.pdbqt	ZINC000000402954	hydromorphone	-7.9	-8.3	-8.1	-8.1	0.2
fda_ligand_1718.pdbqt	ZINC000003806721	codeine	-7.9	-8.3	-8.1	-8.1	0.2
fda_ligand_1858.pdbqt	ZINC000001543475	tdf	-8.4	-8.3	-7.6	-8.1	0.43589
fda_ligand_0017.pdbqt	ZINC000001529323	methotrexate	-8	-8.2	-8.1	-8.1	0.1
fda_ligand_0177.pdbqt	ZINC000028232750	valstar	-7.4	-8.6	-8.3	-8.1	0.6245
fda_ligand_0271.pdbqt	ZINC000009212428	leucal	-8	-8.1	-8.2	-8.1	0.1
fda_ligand_0720.pdbqt	ZINC000018089317	dilatrate sr	-7.8	-8	-8.5	-8.1	0.360555
fda_ligand_1121.pdbqt	ZINC000001530922	fosphenytoin	-7.9	-8.1	-8.3	-8.1	0.2
fda_ligand_1278.pdbqt	ZINC000003977777	cyclocort	-7.9	-8	-8.4	-8.1	0.264575
fda_ligand_1669.pdbqt	ZINC000169621223	ZINC169621223	-7.8	-8.3	-8.2	-8.1	0.264575
fda_ligand_1705.pdbqt	ZINC000003831151	montelukast	-8.1	-8.2	-8	-8.1	0.1
fda_ligand_1810.pdbqt	ZINC000043100953	tedizolid phosphate	-7.7	-8.3	-8.3	-8.1	0.34641
fda_ligand_1855.pdbqt	ZINC000043200832	edoxaban	-8.1	-8.1	-8.1	-8.1	0
fda_ligand_1877.pdbqt	ZINC000001035331	ribasphere	-8	-8.2	-8.1	-8.1	0.1
fda_ligand_1992.pdbqt	ZINC000004097467	megestrol	-8.1	-8.2	-8	-8.1	0.1
fda_ligand_0272.pdbqt	ZINC000009212428	leucal	-8	-8.1	-8.1	-8.06667	0.057735
fda_ligand_0350.pdbqt	ZINC000040430143	olaparib	-7.9	-8.2	-8.1	-8.06667	0.152753
fda_ligand_0858.pdbqt	ZINC000000001370	estazolam	-8	-8.1	-8.1	-8.06667	0.057735
fda_ligand_1106.pdbqt	ZINC000100036924	demeclocycline	-8.1	-8	-8.1	-8.06667	0.057735
fda_ligand_1530.pdbqt	ZINC000001493878	sorafenib	-7.9	-8.2	-8.1	-8.06667	0.152753
fda_ligand_1741.pdbqt	ZINC000003871960	ceftazidime	-7.7	-8.1	-8.4	-8.06667	0.351188
fda_ligand_0813.pdbqt	ZINC000001530621	dorzolamide	-7.8	-8.2	-8.2	-8.06667	0.23094
fda_ligand_0998.pdbqt	ZINC000004340269	amiloride	-8.2	-8	-8	-8.06667	0.11547
fda_ligand_1013.pdbqt	ZINC000003830986	lansoprazole	-8.2	-8	-8	-8.06667	0.11547
fda_ligand_1065.pdbqt	ZINC000005029557	provera	-8	-8.2	-8	-8.06667	0.11547
fda_ligand_1192.pdbqt	ZINC000053683151	bromocriptine	-8	-8.2	-8	-8.06667	0.11547
fda_ligand_1279.pdbqt	ZINC000003985982	inspra	-7.6	-8.8	-7.8	-8.06667	0.64291
fda_ligand_1733.pdbqt	ZINC000003871978	cefuroxime	-8.1	-8.1	-8	-8.06667	0.057735
fda_ligand_1977.pdbqt	ZINC000003827556	delafloxacin	-8.2	-8	-8	-8.06667	0.11547
fda_ligand_1348.pdbqt	ZINC000008220909	ZINC8220909	-7.6	-8.7	-7.9	-8.06667	0.568624
fda_ligand_0060.pdbqt	ZINC000100003902	maraviroc	-7.8	-8.5	-7.8	-8.03333	0.404145
fda_ligand_0078.pdbqt	ZINC000100014475	orfadin	-7.9	-8.1	-8.1	-8.03333	0.11547
fda_ligand_0252.pdbqt	ZINC000008577218	pga	-7.9	-8.1	-8.1	-8.03333	0.11547
fda_ligand_0531.pdbqt	ZINC000100378061	naldemedine	-8.1	-7.9	-8.1	-8.03333	0.11547
fda_ligand_0532.pdbqt	ZINC000100378061	naldemedine	-8.1	-8	-8	-8.03333	0.057735
fda_ligand_0540.pdbqt	ZINC000116473771	ZINC116473771	-7.9	-7.8	-8.4	-8.03333	0.321455
fda_ligand_0861.pdbqt	ZINC000000007782	banzel	-8	-7.9	-8.2	-8.03333	0.152753
fda_ligand_0900.pdbqt	ZINC000004097308	cordran	-7.9	-8	-8.2	-8.03333	0.152753
fda_ligand_0995.pdbqt	ZINC000004212851	lokara	-7.9	-8.2	-8	-8.03333	0.152753
fda_ligand_1061.pdbqt	ZINC000003875334	cortisone	-7.9	-8.2	-8	-8.03333	0.152753
fda_ligand_1092.pdbqt	ZINC000164760756	olysio	-8	-8	-8.1	-8.03333	0.057735
fda_ligand_1333.pdbqt	ZINC000028957444	brilinta	-8	-7.8	-8.3	-8.03333	0.251661
fda_ligand_2102.pdbqt	ZINC000253632968	ZINC253632968	-7.8	-8.2	-8.1	-8.03333	0.208167
fda_ligand_1027.pdbqt	ZINC000000643114	indapamide	-7.9	-8.3	-7.8	-8	0.264575
fda_ligand_0158.pdbqt	ZINC000003938704	ellence	-8	-8.2	-7.8	-8	0.2
fda_ligand_0405.pdbqt	ZINC000001530886	ZINC1530886	-7.7	-8.3	-8	-8	0.3
fda_ligand_0435.pdbqt	ZINC000001485935	isavuconazole	-7	-9	-8	-8	1
fda_ligand_0533.pdbqt	ZINC000100378061	naldemedine	-8	-7.8	-8.2	-8	0.2
fda_ligand_0541.pdbqt	ZINC000084757007	lesinurad	-7.9	-8.1	-8	-8	0.1
fda_ligand_0551.pdbqt	ZINC000003875483	opana	-7.7	-8.2	-8.1	-8	0.264575
fda_ligand_0608.pdbqt	ZINC000003927822	lurasidone	-7.8	-8.2	-8	-8	0.2
fda_ligand_0646.pdbqt	ZINC000022059926	gemifloxacin	-8	-7.9	-8.1	-8	0.1
fda_ligand_0999.pdbqt	ZINC000004340269	amiloride	-8	-8	-8	-8	0
fda_ligand_1961.pdbqt	ZINC000001540998	ZINC1540998	-7.7	-8.1	-8.2	-8	0.264575
fda_ligand_0088.pdbqt	ZINC000008101127	indocyanine green	-7.7	-8.4	-7.8	-7.96667	0.378594
fda_ligand_0144.pdbqt	ZINC000003820029	trajenta	-8	-7.9	-8	-7.96667	0.057735
fda_ligand_0377.pdbqt	ZINC000118912450	oxymetholone	-7.8	-8	-8.1	-7.96667	0.152753
fda_ligand_0503.pdbqt	ZINC000009302239	avibactam	-7.8	-8.1	-8	-7.96667	0.152753
fda_ligand_0557.pdbqt	ZINC000003819392	riociguat	-7.8	-8.2	-7.9	-7.96667	0.208167
fda_ligand_1005.pdbqt	ZINC000003915154	alvesco	-7.9	-8	-8	-7.96667	0.057735
fda_ligand_1108.pdbqt	ZINC000003830264	azt	-7.9	-7.9	-8.1	-7.96667	0.11547
fda_ligand_1856.pdbqt	ZINC000043207238	canagliflozin	-7.8	-8	-8.1	-7.96667	0.152753
fda_ligand_2066.pdbqt	ZINC000003830441	cefotetan	-7.9	-8	-8	-7.96667	0.057735
fda_ligand_2096.pdbqt	ZINC000150338708	ecteinascidin	-7.9	-8	-8	-7.96667	0.057735
fda_ligand_0140.pdbqt	ZINC000001538857	bosentan	-7.9	-7.9	-8	-7.93333	0.057735
fda_ligand_1459.pdbqt	ZINC000003918453	ertapenem	-7.9	-8	-7.9	-7.93333	0.057735
fda_ligand_1486.pdbqt	ZINC000003812983	morphine	-7.7	-8.1	-8	-7.93333	0.208167
fda_ligand_1522.pdbqt	ZINC000014261579	alvesco	-7.8	-8	-8	-7.93333	0.11547
fda_ligand_1891.pdbqt	ZINC000003917708	daunorubicin	-8	-7.8	-8	-7.93333	0.11547
fda_ligand_2002.pdbqt	ZINC000030691754	betrixaban	-8	-7.9	-7.9	-7.93333	0.057735
fda_ligand_1575.pdbqt	ZINC000007997568	macrobid	-7.7	-8	-8.1	-7.93333	0.208167
fda_ligand_1668.pdbqt	ZINC000169621223	ZINC169621223	-7.6	-8.2	-8	-7.93333	0.305505
fda_ligand_0796.pdbqt	ZINC000001481956	paliperidone	-7.8	-8	-7.9	-7.9	0.1
fda_ligand_0966.pdbqt	ZINC000000402954	hydromorphone	-7.7	-8.1	-7.9	-7.9	0.2
fda_ligand_0159.pdbqt	ZINC000029416466	sqv	-8	-8	-7.7	-7.9	0.173205
fda_ligand_0336.pdbqt	ZINC000245204949	ZINC245204949	-7.6	-8.1	-8	-7.9	0.264575
fda_ligand_0349.pdbqt	ZINC000031274852	ZINC31274852	-7.7	-8	-8	-7.9	0.173205
fda_ligand_0415.pdbqt	ZINC000001280665	hydrocodone	-7.7	-8	-8	-7.9	0.173205
fda_ligand_0514.pdbqt	ZINC000030691797	perampanel	-7.8	-7.9	-8	-7.9	0.1
fda_ligand_0609.pdbqt	ZINC000003927822	lurasidone	-7.8	-7.9	-8	-7.9	0.1
fda_ligand_1120.pdbqt	ZINC000001530922	fosphenytoin	-7.6	-8	-8.1	-7.9	0.264575
fda_ligand_1144.pdbqt	ZINC000001530600	cidofovir	-7.6	-8	-8.1	-7.9	0.264575
fda_ligand_1492.pdbqt	ZINC000003927198	cfdn	-7.6	-8.1	-8	-7.9	0.264575
fda_ligand_1889.pdbqt	ZINC000003881640	megace	-7.9	-8	-7.8	-7.9	0.1
fda_ligand_1980.pdbqt	ZINC000003874185	mefloquine	-7.7	-8	-8	-7.9	0.173205
fda_ligand_1987.pdbqt	ZINC000003938652	dermatop	-7.6	-8.2	-7.9	-7.9	0.3
fda_ligand_2095.pdbqt	ZINC000150338708	ecteinascidin	-7.8	-7.9	-8	-7.9	0.1
fda_ligand_0587.pdbqt	ZINC000001611274	topotecan	-7.8	-7.9	-7.9	-7.86667	0.057735
fda_ligand_0733.pdbqt	ZINC000014879992	minocycline	-7.7	-7.9	-8	-7.86667	0.152753
fda_ligand_0734.pdbqt	ZINC000014879992	minocycline	-7.9	-7.8	-7.9	-7.86667	0.057735
fda_ligand_0735.pdbqt	ZINC000014879992	minocycline	-7.7	-7.9	-8	-7.86667	0.152753
fda_ligand_0854.pdbqt	ZINC000000538621	olmesartan	-7.7	-8.3	-7.6	-7.86667	0.378594
fda_ligand_0855.pdbqt	ZINC000000538621	olmesartan	-7.8	-8.3	-7.5	-7.86667	0.404145
fda_ligand_0965.pdbqt	ZINC000003918138	zanamivir	-8	-8.1	-7.5	-7.86667	0.321455
fda_ligand_0968.pdbqt	ZINC000000402954	hydromorphone	-7.7	-8.1	-7.8	-7.86667	0.208167
fda_ligand_1213.pdbqt	ZINC000052509366	zelboraf	-7.7	-8.1	-7.8	-7.86667	0.208167
fda_ligand_1377.pdbqt	ZINC000095616603	topamax	-7.7	-8	-7.9	-7.86667	0.152753
fda_ligand_1685.pdbqt	ZINC000003797541	zytiga	-7.8	-7.9	-7.9	-7.86667	0.057735
fda_ligand_0555.pdbqt	ZINC000003922770	doripenem	-7.6	-8.2	-7.8	-7.86667	0.305505
fda_ligand_0077.pdbqt	ZINC000100070954	ZINC100070954	-7.8	-7.8	-7.9	-7.83333	0.057735
fda_ligand_0157.pdbqt	ZINC000003938704	ellence	-7.8	-8.1	-7.6	-7.83333	0.251661
fda_ligand_0399.pdbqt	ZINC000013818943	lexiscan	-7.6	-8.2	-7.7	-7.83333	0.321455
fda_ligand_0504.pdbqt	ZINC000095551509	grazoprevir	-7.8	-7.8	-7.9	-7.83333	0.057735
fda_ligand_0814.pdbqt	ZINC000001530621	dorzolamide	-7.6	-8	-7.9	-7.83333	0.208167
fda_ligand_0838.pdbqt	ZINC000004212945	dfba	-7.8	-7.7	-8	-7.83333	0.152753
fda_ligand_0842.pdbqt	ZINC000000538312	risperdal	-7.8	-7.8	-7.9	-7.83333	0.057735
fda_ligand_1398.pdbqt	ZINC000003871923	cefepime	-7.6	-7.8	-8.1	-7.83333	0.251661
fda_ligand_1809.pdbqt	ZINC000043100953	tedizolid phosphate	-7.6	-8.1	-7.8	-7.83333	0.251661
fda_ligand_1848.pdbqt	ZINC000000001773	naltrexone	-7.6	-8	-7.9	-7.83333	0.208167
fda_ligand_0997.pdbqt	ZINC000004214700	paliperidone	-7.7	-7.9	-7.8	-7.8	0.1
fda_ligand_0180.pdbqt	ZINC000003813003	klonopin	-7.5	-7.9	-8	-7.8	0.264575
fda_ligand_0385.pdbqt	ZINC000003920719	atorvastatin	-7.6	-7.9	-7.9	-7.8	0.173205
fda_ligand_0390.pdbqt	ZINC000019796168	sildenafil	-7.9	-7.5	-8	-7.8	0.264575
fda_ligand_0797.pdbqt	ZINC000001481956	paliperidone	-8	-7.5	-7.9	-7.8	0.264575
fda_ligand_0841.pdbqt	ZINC000000538312	risperdal	-7.8	-7.6	-8	-7.8	0.2
fda_ligand_1003.pdbqt	ZINC000003843198	uridine triacetate	-7.4	-8	-8	-7.8	0.34641
fda_ligand_1145.pdbqt	ZINC000001530600	cidofovir	-7.4	-8.1	-7.9	-7.8	0.360555
fda_ligand_1166.pdbqt	ZINC000022059930	gemifloxacin	-7.8	-8.1	-7.5	-7.8	0.3
fda_ligand_1212.pdbqt	ZINC000052509366	zelboraf	-7.8	-7.8	-7.8	-7.8	0
fda_ligand_1552.pdbqt	ZINC000035801098	indacaterol	-7.6	-7.9	-7.9	-7.8	0.173205
fda_ligand_1608.pdbqt	ZINC000000015515	zmt	-7.8	-7.8	-7.8	-7.8	0
fda_ligand_2058.pdbqt	ZINC000003776633	acrivastine	-7.6	-7.9	-7.9	-7.8	0.173205
fda_ligand_0648.pdbqt	ZINC000022116608	fenoldopam	-7.8	-7.7	-7.8	-7.76667	0.057735
fda_ligand_0996.pdbqt	ZINC000004214700	paliperidone	-7.6	-7.9	-7.8	-7.76667	0.152753
fda_ligand_1371.pdbqt	ZINC000000537791	amaryl	-7.7	-7.8	-7.8	-7.76667	0.057735
fda_ligand_1499.pdbqt	ZINC000000599734	lansoprazole	-7.5	-7.9	-7.9	-7.76667	0.23094
fda_ligand_1670.pdbqt	ZINC000169621223	ZINC169621223	-7.4	-8	-7.9	-7.76667	0.321455
fda_ligand_2072.pdbqt	ZINC000000537964	mefloquine	-7.7	-7.9	-7.7	-7.76667	0.11547
fda_ligand_0097.pdbqt	ZINC000003833846	nelfinavir	-7.9	-7.4	-7.9	-7.73333	0.288675
fda_ligand_0481.pdbqt	ZINC000011615927	lipitor	-7.5	-7.8	-7.9	-7.73333	0.208167
fda_ligand_0552.pdbqt	ZINC000003914596	saquinavir	-7.7	-7.6	-7.9	-7.73333	0.152753
fda_ligand_1062.pdbqt	ZINC000004228258	kuvan	-7.4	-7.9	-7.9	-7.73333	0.288675
fda_ligand_1064.pdbqt	ZINC000004228258	kuvan	-7.4	-7.9	-7.9	-7.73333	0.288675
fda_ligand_1885.pdbqt	ZINC000003830405	cefazolin	-7.4	-7.9	-7.9	-7.73333	0.288675
fda_ligand_0033.pdbqt	ZINC000000389747	naloxone	-7.5	-7.9	-7.8	-7.73333	0.208167
fda_ligand_0145.pdbqt	ZINC000011616925	folotyn	-7.7	-7.7	-7.8	-7.73333	0.057735
fda_ligand_0351.pdbqt	ZINC000100013130	midostaurin	-7.5	-7.9	-7.8	-7.73333	0.208167
fda_ligand_0391.pdbqt	ZINC000019796168	sildenafil	-7.9	-7.3	-8	-7.73333	0.378594
fda_ligand_0486.pdbqt	ZINC000022010649	panobinostat	-7.6	-7.8	-7.8	-7.73333	0.11547
fda_ligand_0832.pdbqt	ZINC000003812865	olsalazine	-7.5	-8	-7.7	-7.73333	0.251661
fda_ligand_0993.pdbqt	ZINC000003986735	sprycel	-7.6	-7.9	-7.7	-7.73333	0.152753
fda_ligand_1041.pdbqt	ZINC000150338698	capastat	-7.8	-7.6	-7.8	-7.73333	0.11547
fda_ligand_1246.pdbqt	ZINC000003830215	amoxicillin	-7.5	-7.9	-7.8	-7.73333	0.208167
fda_ligand_1266.pdbqt	ZINC000005733652	diosmetin	-7.7	-7.8	-7.7	-7.73333	0.057735
fda_ligand_1269.pdbqt	ZINC000005733652	diosmetin	-7.7	-7.8	-7.7	-7.73333	0.057735
fda_ligand_1346.pdbqt	ZINC000000897089	mefloquine	-7.7	-7.8	-7.7	-7.73333	0.057735
fda_ligand_1699.pdbqt	ZINC000003830453	vantin	-7.5	-7.7	-8	-7.73333	0.251661
fda_ligand_1716.pdbqt	ZINC000003812989	nalbuphine	-7.5	-7.9	-7.8	-7.73333	0.208167
fda_ligand_2057.pdbqt	ZINC000003776633	acrivastine	-7.7	-7.7	-7.8	-7.73333	0.057735
fda_ligand_0029.pdbqt	ZINC000003831405	quinidine	-7.7	-7.6	-7.8	-7.7	0.1
fda_ligand_0124.pdbqt	ZINC000001530555	acyclovir	-7.6	-7.7	-7.8	-7.7	0.1
fda_ligand_0258.pdbqt	ZINC000004228257	kuvan	-7.6	-7.5	-8	-7.7	0.264575
fda_ligand_0864.pdbqt	ZINC000000538627	ambrisentan	-7.5	-7.8	-7.8	-7.7	0.173205
fda_ligand_1040.pdbqt	ZINC000150338698	capastat	-7.7	-7.5	-7.9	-7.7	0.2
fda_ligand_1267.pdbqt	ZINC000005733652	diosmetin	-7.7	-7.7	-7.7	-7.7	0
fda_ligand_1268.pdbqt	ZINC000005733652	diosmetin	-7.7	-7.7	-7.7	-7.7	0
fda_ligand_1372.pdbqt	ZINC000000537791	amaryl	-7.6	-8.3	-7.2	-7.7	0.556776
fda_ligand_1441.pdbqt	ZINC000003936683	solifenacin	-7.7	-7.6	-7.8	-7.7	0.1
fda_ligand_1493.pdbqt	ZINC000003927198	cfdn	-7.3	-7.8	-8	-7.7	0.360555
fda_ligand_1667.pdbqt	ZINC000169621200	ZINC169621200	-7.6	-7.7	-7.8	-7.7	0.1
fda_ligand_0030.pdbqt	ZINC000003831405	quinidine	-7.7	-7.6	-7.7	-7.66667	0.057735
fda_ligand_0160.pdbqt	ZINC000029416466	sqv	-7.5	-8.1	-7.4	-7.66667	0.378594
fda_ligand_0161.pdbqt	ZINC000029416466	sqv	-7.7	-8	-7.3	-7.66667	0.351188
fda_ligand_0222.pdbqt	ZINC000001536109	folotyn	-7.5	-7.6	-7.9	-7.66667	0.208167
fda_ligand_0364.pdbqt	ZINC000003873921	picosulfuric acid	-7.5	-7.8	-7.7	-7.66667	0.152753
fda_ligand_0586.pdbqt	ZINC000001611274	topotecan	-7.6	-7.7	-7.7	-7.66667	0.057735
fda_ligand_0725.pdbqt	ZINC000019702309	tizanidine	-7.5	-8.1	-7.4	-7.66667	0.378594
fda_ligand_0736.pdbqt	ZINC000014879992	minocycline	-7.5	-7.7	-7.8	-7.66667	0.152753
fda_ligand_0740.pdbqt	ZINC000019632834	zopiclone	-7.5	-7.7	-7.8	-7.66667	0.152753
fda_ligand_0741.pdbqt	ZINC000019632834	zopiclone	-7.6	-7.7	-7.7	-7.66667	0.057735
fda_ligand_0815.pdbqt	ZINC000000006157	epinastine	-7.5	-7.8	-7.7	-7.66667	0.152753
fda_ligand_1194.pdbqt	ZINC000095619105	methylergonovine	-7.5	-7.8	-7.7	-7.66667	0.152753
fda_ligand_1361.pdbqt	ZINC000000004724	trileptal	-7.7	-7.7	-7.6	-7.66667	0.057735
fda_ligand_1391.pdbqt	ZINC000003876186	enjuvia	-7.6	-7.8	-7.6	-7.66667	0.11547
fda_ligand_1440.pdbqt	ZINC000003936683	solifenacin	-7.8	-7.4	-7.8	-7.66667	0.23094
fda_ligand_1737.pdbqt	ZINC000003873936	zazole	-7.7	-7.6	-7.7	-7.66667	0.057735
fda_ligand_1757.pdbqt	ZINC000003938686	palbociclib	-7.7	-7.4	-7.9	-7.66667	0.251661
fda_ligand_1910.pdbqt	ZINC000043450326	synribo	-7.1	-8.5	-7.4	-7.66667	0.737111
fda_ligand_2059.pdbqt	ZINC000003779042	retrovir	-7.6	-7.7	-7.7	-7.66667	0.057735
fda_ligand_0948.pdbqt	ZINC000000004321	zonegran	-7.4	-7.7	-7.8	-7.63333	0.208167
fda_ligand_0059.pdbqt	ZINC000003956788	alinia	-7.5	-7.7	-7.7	-7.63333	0.11547
fda_ligand_0090.pdbqt	ZINC000028108825	gadofosveset	-7.1	-8	-7.8	-7.63333	0.472582
fda_ligand_0121.pdbqt	ZINC000000592419	daxas	-7.4	-7.8	-7.7	-7.63333	0.208167
fda_ligand_0281.pdbqt	ZINC000002036848	riboflavin	-7.9	-7.6	-7.4	-7.63333	0.251661
fda_ligand_0348.pdbqt	ZINC000031274852	ZINC31274852	-7.4	-7.8	-7.7	-7.63333	0.208167
fda_ligand_0479.pdbqt	ZINC000011615926	lipitor	-7.3	-7.7	-7.9	-7.63333	0.305505
fda_ligand_0553.pdbqt	ZINC000003914596	saquinavir	-7.6	-7.8	-7.5	-7.63333	0.152753
fda_ligand_0703.pdbqt	ZINC000018324776	vardenafil	-7.5	-7.6	-7.8	-7.63333	0.152753
fda_ligand_0742.pdbqt	ZINC000019632834	zopiclone	-7.5	-7.7	-7.7	-7.63333	0.11547
fda_ligand_0826.pdbqt	ZINC000003920657	ZINC3920657	-7.7	-7.2	-8	-7.63333	0.404145
fda_ligand_1366.pdbqt	ZINC000222731806	ZINC222731806	-7.7	-7.6	-7.6	-7.63333	0.057735
fda_ligand_1474.pdbqt	ZINC000003920027	flovent	-7.5	-7.4	-8	-7.63333	0.321455
fda_ligand_1825.pdbqt	ZINC000000643153	nizoral	-8	-7.2	-7.7	-7.63333	0.404145
fda_ligand_2068.pdbqt	ZINC000003802417	entereg	-7.7	-7.6	-7.6	-7.63333	0.057735
fda_ligand_2097.pdbqt	ZINC000150338708	ecteinascidin	-7.4	-7.8	-7.7	-7.63333	0.208167
fda_ligand_0215.pdbqt	ZINC000068202099	erismodegib	-7.7	-7.4	-7.7	-7.6	0.173205
fda_ligand_0284.pdbqt	ZINC000003881958	danol	-7.6	-7.5	-7.7	-7.6	0.1
fda_ligand_0362.pdbqt	ZINC000003830391	cefadroxil	-7.6	-7.4	-7.8	-7.6	0.2
fda_ligand_0482.pdbqt	ZINC000011615928	lipitor	-7.3	-7.8	-7.7	-7.6	0.264575
fda_ligand_0834.pdbqt	ZINC000004212854	topicort	-7.5	-7.6	-7.7	-7.6	0.1
fda_ligand_0962.pdbqt	ZINC000003875259	diovan	-7.7	-7.7	-7.4	-7.6	0.173205
fda_ligand_1126.pdbqt	ZINC000002519740	fospropofol	-7.5	-7.6	-7.7	-7.6	0.1
fda_ligand_1247.pdbqt	ZINC000003830215	amoxicillin	-7.3	-7.8	-7.7	-7.6	0.264575
fda_ligand_1302.pdbqt	ZINC000027428713	emend	-7	-7.9	-7.9	-7.6	0.519615
fda_ligand_1617.pdbqt	ZINC000000601305	indapamide	-7.2	-7.7	-7.9	-7.6	0.360555
fda_ligand_1756.pdbqt	ZINC000003938686	palbociclib	-7.8	-7.3	-7.7	-7.6	0.264575
fda_ligand_1824.pdbqt	ZINC000000643153	nizoral	-7.8	-7.3	-7.7	-7.6	0.264575
fda_ligand_1847.pdbqt	ZINC000000001773	naltrexone	-7.5	-7.9	-7.4	-7.6	0.264575
fda_ligand_1890.pdbqt	ZINC000003913937	piperacillin	-7.4	-7.7	-7.7	-7.6	0.173205
fda_ligand_1964.pdbqt	ZINC000100017856	mepron	-7.3	-7.8	-7.7	-7.6	0.264575
fda_ligand_1965.pdbqt	ZINC000100017856	mepron	-7.3	-7.8	-7.7	-7.6	0.264575
fda_ligand_1999.pdbqt	ZINC000021981454	cloderm	-7.4	-7.6	-7.8	-7.6	0.2
fda_ligand_2076.pdbqt	ZINC000003989268	ceftaroline fosamil	-7	-7.5	-8.3	-7.6	0.655744
fda_ligand_0280.pdbqt	ZINC000002036848	riboflavin	-7.5	-7.7	-7.6	-7.6	0.1
fda_ligand_0392.pdbqt	ZINC000019796168	sildenafil	-7.8	-6.9	-8.1	-7.6	0.6245
fda_ligand_0442.pdbqt	ZINC000003882036	kenalog	-7.6	-7.6	-7.6	-7.6	0
fda_ligand_0647.pdbqt	ZINC000022116608	fenoldopam	-7.6	-7.6	-7.6	-7.6	0
fda_ligand_1033.pdbqt	ZINC000005752191	psorcon	-7.3	-7.9	-7.6	-7.6	0.3
fda_ligand_1220.pdbqt	ZINC000000000655	biltricide	-7.5	-7.7	-7.6	-7.6	0.1
fda_ligand_1736.pdbqt	ZINC000003873936	zazole	-7.6	-7.3	-7.9	-7.6	0.3
fda_ligand_1783.pdbqt	ZINC000003925861	vorapaxar	-7.6	-7.6	-7.6	-7.6	0
fda_ligand_1887.pdbqt	ZINC000003861599	aldactone	-7.5	-7.7	-7.6	-7.6	0.1
fda_ligand_0091.pdbqt	ZINC000028108825	gadofosveset	-7.8	-7.5	-7.4	-7.56667	0.208167
fda_ligand_1133.pdbqt	ZINC000011616882	ZINC11616882	-7.4	-7.7	-7.6	-7.56667	0.152753
fda_ligand_0092.pdbqt	ZINC000028108825	gadofosveset	-7.6	-7.5	-7.6	-7.56667	0.057735
fda_ligand_0250.pdbqt	ZINC000003875332	dexamethasone	-7.5	-7.6	-7.6	-7.56667	0.057735
fda_ligand_0458.pdbqt	ZINC000001489478	sitagliptin	-7.5	-7.6	-7.6	-7.56667	0.057735
fda_ligand_0459.pdbqt	ZINC000001489478	sitagliptin	-7.5	-7.6	-7.6	-7.56667	0.057735
fda_ligand_0520.pdbqt	ZINC000036701290	ponatinib	-7.6	-7.5	-7.6	-7.56667	0.057735
fda_ligand_0655.pdbqt	ZINC000002008866	zyvox	-7.3	-7.8	-7.6	-7.56667	0.251661
fda_ligand_0758.pdbqt	ZINC000019632618	imatinib	-7.2	-8	-7.5	-7.56667	0.404145
fda_ligand_0761.pdbqt	ZINC000014768621	chlorhexidine	-7.4	-7.6	-7.7	-7.56667	0.152753
fda_ligand_1169.pdbqt	ZINC000000896717	accolate	-6.9	-8.2	-7.6	-7.56667	0.650641
fda_ligand_1177.pdbqt	ZINC000000403533	oxycodone	-7.3	-7.7	-7.7	-7.56667	0.23094
fda_ligand_1332.pdbqt	ZINC000005764759	methylnaltrexone	-7.5	-7.6	-7.6	-7.56667	0.057735
fda_ligand_1770.pdbqt	ZINC000000057255	thalitone	-7.5	-7.6	-7.6	-7.56667	0.057735
fda_ligand_0068.pdbqt	ZINC000003816287	axitinib	-7.3	-7.7	-7.6	-7.53333	0.208167
fda_ligand_0095.pdbqt	ZINC000003833846	nelfinavir	-7.9	-7.3	-7.4	-7.53333	0.321455
fda_ligand_0109.pdbqt	ZINC000000004448	zofran	-7.5	-7.4	-7.7	-7.53333	0.152753
fda_ligand_0181.pdbqt	ZINC000004258316	azathioprine	-7.4	-7.4	-7.8	-7.53333	0.23094
fda_ligand_0182.pdbqt	ZINC000001543873	shh	-7.5	-7.4	-7.7	-7.53333	0.152753
fda_ligand_0521.pdbqt	ZINC000036701290	ponatinib	-7.6	-7.5	-7.5	-7.53333	0.057735
fda_ligand_0549.pdbqt	ZINC000003875483	opana	-7.1	-8	-7.5	-7.53333	0.450925
fda_ligand_0701.pdbqt	ZINC000018324776	vardenafil	-7.7	-7.1	-7.8	-7.53333	0.378594
fda_ligand_0749.pdbqt	ZINC000013537284	alosetron	-7.5	-7.5	-7.6	-7.53333	0.057735
fda_ligand_1086.pdbqt	ZINC000003939013	fosaprepitant	-7.6	-7.4	-7.6	-7.53333	0.11547
fda_ligand_1125.pdbqt	ZINC000002519740	fospropofol	-7.4	-7.5	-7.7	-7.53333	0.152753
fda_ligand_1127.pdbqt	ZINC000002519740	fospropofol	-7.4	-7.6	-7.6	-7.53333	0.11547
fda_ligand_1186.pdbqt	ZINC000052716421	flibanserin	-7.5	-7.5	-7.6	-7.53333	0.057735
fda_ligand_1187.pdbqt	ZINC000052716421	flibanserin	-7.5	-7.4	-7.7	-7.53333	0.152753
fda_ligand_1276.pdbqt	ZINC000001995484	valganciclovir	-7.5	-7.8	-7.3	-7.53333	0.251661
fda_ligand_1277.pdbqt	ZINC000001995484	valganciclovir	-7.2	-8	-7.4	-7.53333	0.416333
fda_ligand_1373.pdbqt	ZINC000000537791	amaryl	-7.5	-8	-7.1	-7.53333	0.450925
fda_ligand_1383.pdbqt	ZINC000004428529	gesterol	-7.5	-7.5	-7.6	-7.53333	0.057735
fda_ligand_1598.pdbqt	ZINC000036520252	empagliflozin	-7.6	-7.5	-7.5	-7.53333	0.057735
fda_ligand_1695.pdbqt	ZINC000003776970	cefprozil anhydrous	-7.6	-7.2	-7.8	-7.53333	0.305505
fda_ligand_1700.pdbqt	ZINC000003784182	differin	-7.4	-7.5	-7.7	-7.53333	0.152753
fda_ligand_1829.pdbqt	ZINC000022448696	indinavir	-7.5	-7.5	-7.6	-7.53333	0.057735
fda_ligand_1854.pdbqt	ZINC000043200832	edoxaban	-7.6	-7.6	-7.4	-7.53333	0.11547
fda_ligand_1905.pdbqt	ZINC000019632628	seroquel	-7.5	-7.6	-7.5	-7.53333	0.057735
fda_ligand_2021.pdbqt	ZINC000004215234	cdtr-pi	-7.2	-7.5	-7.9	-7.53333	0.351188
fda_ligand_0417.pdbqt	ZINC000003875357	prednisone	-7.3	-7.6	-7.7	-7.53333	0.208167
fda_ligand_2107.pdbqt	ZINC000096006023	ZINC96006023	-7.2	-8.2	-7.2	-7.53333	0.57735
fda_ligand_0071.pdbqt	ZINC000004216238	ZINC4216238	-7.4	-7.5	-7.6	-7.5	0.1
fda_ligand_0259.pdbqt	ZINC000004228257	kuvan	-7.5	-7.6	-7.4	-7.5	0.1
fda_ligand_0301.pdbqt	ZINC000002570895	celebrex	-7.5	-7.4	-7.6	-7.5	0.1
fda_ligand_0407.pdbqt	ZINC000002020233	efv	-7.7	-7.3	-7.5	-7.5	0.2
fda_ligand_0510.pdbqt	ZINC000004474443	cefprozil	-7.5	-7.3	-7.7	-7.5	0.2
fda_ligand_0558.pdbqt	ZINC000003792417	sacubitril	-7.6	-7.5	-7.4	-7.5	0.1
fda_ligand_0656.pdbqt	ZINC000002016037	sertaconazole	-7.4	-7.4	-7.7	-7.5	0.173205
fda_ligand_0750.pdbqt	ZINC000013537284	alosetron	-7.4	-7.5	-7.6	-7.5	0.1
fda_ligand_0760.pdbqt	ZINC000019632618	imatinib	-7	-7.7	-7.8	-7.5	0.43589
fda_ligand_0865.pdbqt	ZINC000000538658	samsca	-7.6	-7.2	-7.7	-7.5	0.264575
fda_ligand_0961.pdbqt	ZINC000003860453	ak-fluor	-7.5	-7.5	-7.5	-7.5	0
fda_ligand_0963.pdbqt	ZINC000003875259	diovan	-7.5	-7.6	-7.4	-7.5	0.1
fda_ligand_1295.pdbqt	ZINC000100032379	tipiracil	-7.5	-7.4	-7.6	-7.5	0.1
fda_ligand_1301.pdbqt	ZINC000100074252	sofosbuvir	-7.6	-7.2	-7.7	-7.5	0.264575
fda_ligand_1316.pdbqt	ZINC000094566092	doxazosin	-7.6	-7.3	-7.6	-7.5	0.173205
fda_ligand_1384.pdbqt	ZINC000002539827	kuvan	-7.5	-7.5	-7.5	-7.5	0
fda_ligand_1386.pdbqt	ZINC000002539827	kuvan	-7.5	-7.5	-7.5	-7.5	0
fda_ligand_1683.pdbqt	ZINC000000403566	biltricide	-7.6	-7.5	-7.4	-7.5	0.1
fda_ligand_1831.pdbqt	ZINC000022448696	indinavir	-7.5	-7.5	-7.5	-7.5	0
fda_ligand_1849.pdbqt	ZINC000000001773	naltrexone	-7.2	-7.7	-7.6	-7.5	0.264575
fda_ligand_1904.pdbqt	ZINC000019632628	seroquel	-7.4	-7.6	-7.5	-7.5	0.1
fda_ligand_1950.pdbqt	ZINC000000002688	anzemet	-7.4	-7.5	-7.6	-7.5	0.1
fda_ligand_2004.pdbqt	ZINC000068247389	ZINC68247389	-7.3	-7.6	-7.6	-7.5	0.173205
fda_ligand_2069.pdbqt	ZINC000003802417	entereg	-7	-7.8	-7.7	-7.5	0.43589
fda_ligand_0034.pdbqt	ZINC000000389747	naloxone	-7.4	-7.7	-7.3	-7.46667	0.208167
fda_ligand_0702.pdbqt	ZINC000018324776	vardenafil	-7.7	-6.9	-7.8	-7.46667	0.493288
fda_ligand_0020.pdbqt	ZINC000014961096	alogliptin	-7.2	-7.6	-7.6	-7.46667	0.23094
fda_ligand_0045.pdbqt	ZINC000000005823	demadex	-7.1	-8.1	-7.2	-7.46667	0.550757
fda_ligand_0061.pdbqt	ZINC000100003902	maraviroc	-7.3	-7.6	-7.5	-7.46667	0.152753
fda_ligand_0191.pdbqt	ZINC000014164617	obeticholic acid	-7.5	-7.4	-7.5	-7.46667	0.057735
fda_ligand_0328.pdbqt	ZINC000001542930	cesamet	-7.1	-7.7	-7.6	-7.46667	0.321455
fda_ligand_0329.pdbqt	ZINC000001550477	lapatinib	-7.5	-7.6	-7.3	-7.46667	0.152753
fda_ligand_0534.pdbqt	ZINC000084668739	lifitegrast	-7.2	-7.5	-7.7	-7.46667	0.251661
fda_ligand_0537.pdbqt	ZINC000070466416	cabozantinib	-7	-8	-7.4	-7.46667	0.503322
fda_ligand_0682.pdbqt	ZINC000001530635	fcv	-7.3	-7.4	-7.7	-7.46667	0.208167
fda_ligand_0759.pdbqt	ZINC000019632618	imatinib	-7	-8.3	-7.1	-7.46667	0.723418
fda_ligand_0849.pdbqt	ZINC000000537795	glipizide	-7.1	-7.9	-7.4	-7.46667	0.404145
fda_ligand_1203.pdbqt	ZINC000049036447	suvorexant	-7.5	-7.7	-7.2	-7.46667	0.251661
fda_ligand_1282.pdbqt	ZINC000100014909	nintedanib	-7.4	-7.5	-7.5	-7.46667	0.057735
fda_ligand_1370.pdbqt	ZINC000000537791	amaryl	-7.4	-7.6	-7.4	-7.46667	0.11547
fda_ligand_1525.pdbqt	ZINC000001539579	targretin	-7.3	-7.5	-7.6	-7.46667	0.152753
fda_ligand_1551.pdbqt	ZINC000035801098	indacaterol	-7	-7.6	-7.8	-7.46667	0.416333
fda_ligand_1568.pdbqt	ZINC000000000507	midodrine	-7.4	-7.5	-7.5	-7.46667	0.057735
fda_ligand_1660.pdbqt	ZINC000000896755	zaroxolyn	-7.2	-7.7	-7.5	-7.46667	0.251661
fda_ligand_1662.pdbqt	ZINC000000897222	bhft	-7.3	-7.5	-7.6	-7.46667	0.152753
fda_ligand_1665.pdbqt	ZINC000013129998	meloxicam	-7.5	-7.4	-7.5	-7.46667	0.057735
fda_ligand_1679.pdbqt	ZINC000003938746	reserpine	-7.2	-7.8	-7.4	-7.46667	0.305505
fda_ligand_2019.pdbqt	ZINC000003992105	avamys	-7.2	-7.5	-7.7	-7.46667	0.251661
fda_ligand_2081.pdbqt	ZINC000013911941	zemplar	-7.4	-7.5	-7.5	-7.46667	0.057735
fda_ligand_0027.pdbqt	ZINC000000018635	frovatriptan	-7.4	-7.4	-7.5	-7.43333	0.057735
fda_ligand_0035.pdbqt	ZINC000000389747	naloxone	-7.2	-7.6	-7.5	-7.43333	0.208167
fda_ligand_0228.pdbqt	ZINC000003802690	baraclude	-7.3	-7.5	-7.5	-7.43333	0.11547
fda_ligand_0356.pdbqt	ZINC000026985532	sqv	-7.4	-7.4	-7.5	-7.43333	0.057735
fda_ligand_0395.pdbqt	ZINC000000075126	zofran	-7.3	-7.5	-7.5	-7.43333	0.11547
fda_ligand_0511.pdbqt	ZINC000004474443	cefprozil	-7.4	-7.4	-7.5	-7.43333	0.057735
fda_ligand_0602.pdbqt	ZINC000001534965	pitavastatin	-7.3	-7.5	-7.5	-7.43333	0.11547
fda_ligand_0768.pdbqt	ZINC000000004785	tegretol	-7.4	-7.6	-7.3	-7.43333	0.152753
fda_ligand_1007.pdbqt	ZINC000000113426	tetrahydrozoline	-7.2	-7.6	-7.5	-7.43333	0.208167
fda_ligand_1171.pdbqt	ZINC000000897085	mefloquine	-7.4	-7.4	-7.5	-7.43333	0.057735
fda_ligand_1281.pdbqt	ZINC000100014909	nintedanib	-7.4	-7.5	-7.4	-7.43333	0.057735
fda_ligand_1321.pdbqt	ZINC000027990463	lomitapide	-7.5	-7.3	-7.5	-7.43333	0.11547
fda_ligand_1376.pdbqt	ZINC000000537931	loratadine	-7.4	-7.5	-7.4	-7.43333	0.057735
fda_ligand_1444.pdbqt	ZINC000000000596	pentazocine	-7.4	-7.2	-7.7	-7.43333	0.251661
fda_ligand_1621.pdbqt	ZINC000001530803	felbatol	-7.3	-7.5	-7.5	-7.43333	0.11547
fda_ligand_1642.pdbqt	ZINC000003813061	bumetanide	-7.7	-7.2	-7.4	-7.43333	0.251661
fda_ligand_1678.pdbqt	ZINC000003938746	reserpine	-7.3	-7.5	-7.5	-7.43333	0.11547
fda_ligand_1853.pdbqt	ZINC000043200832	edoxaban	-7.4	-7.5	-7.4	-7.43333	0.057735
fda_ligand_1988.pdbqt	ZINC000003945984	vexol	-7.1	-7.7	-7.5	-7.43333	0.305505
fda_ligand_0255.pdbqt	ZINC000100015048	dn-101	-7.3	-7.6	-7.4	-7.43333	0.152753
fda_ligand_0386.pdbqt	ZINC000004083606	hydroxyprogesterone	-7.2	-7.5	-7.6	-7.43333	0.208167
fda_ligand_0485.pdbqt	ZINC000034806477	xtandi	-7.3	-7.4	-7.6	-7.43333	0.152753
fda_ligand_0843.pdbqt	ZINC000000020253	thalitone	-7.2	-7.5	-7.6	-7.43333	0.208167
fda_ligand_1028.pdbqt	ZINC000000643138	nizoral	-7.6	-7.3	-7.4	-7.43333	0.152753
fda_ligand_1303.pdbqt	ZINC000027428713	emend	-7	-7.7	-7.6	-7.43333	0.378594
fda_ligand_0136.pdbqt	ZINC000003861768	ZINC3861768	-7.1	-7.2	-7.9	-7.4	0.43589
fda_ligand_0363.pdbqt	ZINC000003830391	cefadroxil	-7.4	-7.2	-7.6	-7.4	0.2
fda_ligand_0630.pdbqt	ZINC000000002212	halcion	-6.7	-8.4	-7.1	-7.4	0.888819
fda_ligand_0793.pdbqt	ZINC000001481815	exjade	-7.5	-7.3	-7.4	-7.4	0.1
fda_ligand_1888.pdbqt	ZINC000003875439	oxacillin	-7.4	-7.4	-7.4	-7.4	0
fda_ligand_0006.pdbqt	ZINC000000120286	triamteril	-7.2	-7.7	-7.3	-7.4	0.264575
fda_ligand_0074.pdbqt	ZINC000034089131	ZINC34089131	-7.2	-7.5	-7.5	-7.4	0.173205
fda_ligand_0341.pdbqt	ZINC000004641374	doxercalciferol	-7.3	-7.4	-7.5	-7.4	0.1
fda_ligand_0554.pdbqt	ZINC000003914596	saquinavir	-7.2	-7.5	-7.5	-7.4	0.173205
fda_ligand_0848.pdbqt	ZINC000000537795	glipizide	-7.4	-7.5	-7.3	-7.4	0.1
fda_ligand_1004.pdbqt	ZINC000003875484	androxy	-7.3	-7.6	-7.3	-7.4	0.173205
fda_ligand_1296.pdbqt	ZINC000100032379	tipiracil	-7.3	-7.4	-7.5	-7.4	0.1
fda_ligand_1304.pdbqt	ZINC000094566093	doxazosin	-7.4	-7.3	-7.5	-7.4	0.1
fda_ligand_1315.pdbqt	ZINC000118912517	fml	-7.2	-7.5	-7.5	-7.4	0.173205
fda_ligand_1393.pdbqt	ZINC000003875560	methylprednisolone	-7.3	-7.4	-7.5	-7.4	0.1
fda_ligand_1589.pdbqt	ZINC000019203912	fluphenazine	-7.2	-7.7	-7.3	-7.4	0.264575
fda_ligand_1712.pdbqt	ZINC000003798247	clolar	-7.3	-7.6	-7.3	-7.4	0.173205
fda_ligand_2005.pdbqt	ZINC000068247389	ZINC68247389	-7.3	-7.3	-7.6	-7.4	0.173205
fda_ligand_2101.pdbqt	ZINC000085537017	cangrelor	-7.5	-7.4	-7.3	-7.4	0.1
fda_ligand_2109.pdbqt	ZINC000003817234	celsentri	-7.4	-7.3	-7.5	-7.4	0.1
fda_ligand_0108.pdbqt	ZINC000000004448	zofran	-7.2	-7.5	-7.4	-7.36667	0.152753
fda_ligand_0111.pdbqt	ZINC000000538564	casodex	-7.3	-7.4	-7.4	-7.36667	0.057735
fda_ligand_0166.pdbqt	ZINC000001482049	droxidopa	-7.3	-7.4	-7.4	-7.36667	0.057735
fda_ligand_0357.pdbqt	ZINC000026985532	sqv	-7.2	-7.5	-7.4	-7.36667	0.152753
fda_ligand_0473.pdbqt	ZINC000011681563	netupitant	-6.7	-8.6	-6.8	-7.36667	1.06927
fda_ligand_0484.pdbqt	ZINC000011677837	eliquis	-7.3	-7.5	-7.3	-7.36667	0.11547
fda_ligand_0538.pdbqt	ZINC000070466416	cabozantinib	-7	-7.6	-7.5	-7.36667	0.321455
fda_ligand_0657.pdbqt	ZINC000002016037	sertaconazole	-7.3	-7.2	-7.6	-7.36667	0.208167
fda_ligand_0715.pdbqt	ZINC000019796080	inapsine	-7.4	-7.3	-7.4	-7.36667	0.057735
fda_ligand_0731.pdbqt	ZINC000014210457	victrelis	-7.3	-7.3	-7.5	-7.36667	0.11547
fda_ligand_0748.pdbqt	ZINC000018279854	gemcitabine	-7.2	-7.5	-7.4	-7.36667	0.152753
fda_ligand_0762.pdbqt	ZINC000014768621	chlorhexidine	-7.1	-6.7	-8.3	-7.36667	0.832666
fda_ligand_0935.pdbqt	ZINC000001530571	buspirone	-7.3	-7.5	-7.3	-7.36667	0.11547
fda_ligand_0973.pdbqt	ZINC000003798064	ZINC3798064	-7.3	-7.4	-7.4	-7.36667	0.057735
fda_ligand_1288.pdbqt	ZINC000087515509	dexrazoxane	-7.3	-7.5	-7.3	-7.36667	0.11547
fda_ligand_1318.pdbqt	ZINC000095626706	midazolam	-7.5	-6.9	-7.7	-7.36667	0.416333
fda_ligand_1342.pdbqt	ZINC000030691736	apremilast	-7.4	-7.3	-7.4	-7.36667	0.057735
fda_ligand_1558.pdbqt	ZINC000035328014	ibrutinib	-7.4	-7.5	-7.2	-7.36667	0.152753
fda_ligand_1652.pdbqt	ZINC000003812863	lisinopril	-7.3	-7.3	-7.5	-7.36667	0.11547
fda_ligand_1653.pdbqt	ZINC000003812863	lisinopril	-7.3	-7.3	-7.5	-7.36667	0.11547
fda_ligand_1677.pdbqt	ZINC000003938746	reserpine	-7.3	-7.4	-7.4	-7.36667	0.057735
fda_ligand_1696.pdbqt	ZINC000003776970	cefprozil anhydrous	-7.4	-7.2	-7.5	-7.36667	0.152753
fda_ligand_1835.pdbqt	ZINC000043207851	ruxolitinib	-7.3	-7.4	-7.4	-7.36667	0.057735
fda_ligand_1870.pdbqt	ZINC000001883067	trinitrophenol	-7.5	-7.2	-7.4	-7.36667	0.152753
fda_ligand_1922.pdbqt	ZINC000100006264	rax	-7.2	-7.5	-7.4	-7.36667	0.152753
fda_ligand_1935.pdbqt	ZINC000096272772	ceritinib	-7.3	-7.4	-7.4	-7.36667	0.057735
fda_ligand_2007.pdbqt	ZINC000072318121	abemaciclib	-7.3	-7.5	-7.3	-7.36667	0.11547
fda_ligand_2056.pdbqt	ZINC000003201907	dxm	-7.1	-7.5	-7.5	-7.36667	0.23094
fda_ligand_2099.pdbqt	ZINC000085537017	cangrelor	-7.4	-7.4	-7.3	-7.36667	0.057735
fda_ligand_2103.pdbqt	ZINC000253917094	ZINC253917094	-7.4	-7.4	-7.3	-7.36667	0.057735
fda_ligand_1146.pdbqt	ZINC000001530600	cidofovir	-7.3	-7.6	-7.2	-7.36667	0.208167
fda_ligand_0014.pdbqt	ZINC000051133897	piroxicam	-7.3	-7.3	-7.4	-7.33333	0.057735
fda_ligand_0094.pdbqt	ZINC000100013500	ZINC100013500	-7.3	-7.3	-7.4	-7.33333	0.057735
fda_ligand_0199.pdbqt	ZINC000003921872	dovonex	-7.3	-7.2	-7.5	-7.33333	0.152753
fda_ligand_0352.pdbqt	ZINC000026664090	sqv	-6.9	-8	-7.1	-7.33333	0.585947
fda_ligand_0359.pdbqt	ZINC000003874498	anandron	-7.3	-7.2	-7.5	-7.33333	0.152753
fda_ligand_0500.pdbqt	ZINC000100018854	ZINC100018854	-7.3	-7.3	-7.4	-7.33333	0.057735
fda_ligand_0502.pdbqt	ZINC000100018854	ZINC100018854	-7.2	-7.4	-7.4	-7.33333	0.11547
fda_ligand_0543.pdbqt	ZINC000013986658	idelalisib	-7.5	-7.3	-7.2	-7.33333	0.152753
fda_ligand_0566.pdbqt	ZINC000003876136	luxiq	-7.1	-7.7	-7.2	-7.33333	0.321455
fda_ligand_0717.pdbqt	ZINC000019796080	inapsine	-7.4	-7.2	-7.4	-7.33333	0.11547
fda_ligand_0913.pdbqt	ZINC000002510358	phenytoin	-7.1	-7.4	-7.5	-7.33333	0.208167
fda_ligand_0979.pdbqt	ZINC000000491073	galantamine	-7.1	-7.5	-7.4	-7.33333	0.208167
fda_ligand_1045.pdbqt	ZINC000000895199	dopal	-7.2	-7.4	-7.4	-7.33333	0.11547
fda_ligand_1168.pdbqt	ZINC000022116612	fenoldopam	-7.2	-7.5	-7.3	-7.33333	0.152753
fda_ligand_1206.pdbqt	ZINC000052509463	vx-770	-7.3	-7.3	-7.4	-7.33333	0.057735
fda_ligand_1207.pdbqt	ZINC000052509463	vx-770	-7.3	-7.3	-7.4	-7.33333	0.057735
fda_ligand_1253.pdbqt	ZINC000035024346	ZINC35024346	-7.1	-7.6	-7.3	-7.33333	0.251661
fda_ligand_1317.pdbqt	ZINC000094566092	doxazosin	-7.4	-7.2	-7.4	-7.33333	0.11547
fda_ligand_1442.pdbqt	ZINC000000001505	ganciclovir	-7.4	-7	-7.6	-7.33333	0.305505
fda_ligand_1501.pdbqt	ZINC000000896740	miconazole	-7.2	-7.5	-7.3	-7.33333	0.152753
fda_ligand_1548.pdbqt	ZINC000035342789	tasmar	-7.3	-7.4	-7.3	-7.33333	0.057735
fda_ligand_1588.pdbqt	ZINC000019203912	fluphenazine	-7.1	-7.5	-7.4	-7.33333	0.208167
fda_ligand_1762.pdbqt	ZINC000003953037	azopt	-7.1	-7.4	-7.5	-7.33333	0.208167
fda_ligand_1828.pdbqt	ZINC000022448696	indinavir	-6.9	-7.5	-7.6	-7.33333	0.378594
fda_ligand_1830.pdbqt	ZINC000022448696	indinavir	-7.6	-7.5	-6.9	-7.33333	0.378594
fda_ligand_1832.pdbqt	ZINC000022448696	indinavir	-7.2	-7.5	-7.3	-7.33333	0.152753
fda_ligand_1883.pdbqt	ZINC000003814422	android	-7.2	-7.4	-7.4	-7.33333	0.11547
fda_ligand_1916.pdbqt	ZINC000084589076	rax	-7.2	-7.7	-7.1	-7.33333	0.321455
fda_ligand_1933.pdbqt	ZINC000072316335	ZINC72316335	-7.3	-7.4	-7.3	-7.33333	0.057735
fda_ligand_1934.pdbqt	ZINC000072316335	ZINC72316335	-7.3	-7.4	-7.3	-7.33333	0.057735
fda_ligand_1942.pdbqt	ZINC000000000347	granisetron	-7.3	-7.3	-7.4	-7.33333	0.057735
fda_ligand_1991.pdbqt	ZINC000004097304	ZINC4097304	-7.1	-7.6	-7.3	-7.33333	0.251661
fda_ligand_2000.pdbqt	ZINC000028973441	clorazepate	-7.3	-7.3	-7.4	-7.33333	0.057735
fda_ligand_2071.pdbqt	ZINC000003813047	oxandrolone	-7.3	-7.3	-7.4	-7.33333	0.057735
fda_ligand_2108.pdbqt	ZINC000003817234	celsentri	-7.1	-7.5	-7.4	-7.33333	0.208167
fda_ligand_0562.pdbqt	ZINC000003830842	flecainide	-7.2	-7.4	-7.3	-7.3	0.1
fda_ligand_1816.pdbqt	ZINC000000020243	diflunisal	-7.2	-7.4	-7.3	-7.3	0.1
fda_ligand_0257.pdbqt	ZINC000004629876	daral	-7.2	-7.3	-7.4	-7.3	0.1
fda_ligand_0282.pdbqt	ZINC000003830218	ampicillin	-7.2	-7.3	-7.4	-7.3	0.1
fda_ligand_0283.pdbqt	ZINC000003830218	ampicillin	-7.3	-7.2	-7.4	-7.3	0.1
fda_ligand_0376.pdbqt	ZINC000003831490	azulfidine	-7.1	-7.6	-7.2	-7.3	0.264575
fda_ligand_0397.pdbqt	ZINC000003931840	altabax	-7.3	-7.1	-7.5	-7.3	0.2
fda_ligand_0468.pdbqt	ZINC000000006481	rilutek	-7	-7.4	-7.5	-7.3	0.264575
fda_ligand_0474.pdbqt	ZINC000011681563	netupitant	-6.6	-8.6	-6.7	-7.3	1.12694
fda_ligand_0582.pdbqt	ZINC000000537805	diabeta	-6.8	-7.6	-7.5	-7.3	0.43589
fda_ligand_0700.pdbqt	ZINC000001530948	thalomid	-7.2	-7.3	-7.4	-7.3	0.1
fda_ligand_0726.pdbqt	ZINC000019702309	tizanidine	-7.1	-7.5	-7.3	-7.3	0.2
fda_ligand_0867.pdbqt	ZINC000000601254	zaroxolyn	-6.8	-7.4	-7.7	-7.3	0.458258
fda_ligand_0954.pdbqt	ZINC000000538273	ofloxacin	-7.3	-7.2	-7.4	-7.3	0.1
fda_ligand_0964.pdbqt	ZINC000003875980	nafcillin	-7.2	-7.3	-7.4	-7.3	0.1
fda_ligand_0978.pdbqt	ZINC000000491073	galantamine	-7.1	-7.4	-7.4	-7.3	0.173205
fda_ligand_0980.pdbqt	ZINC000000491073	galantamine	-7.1	-7.4	-7.4	-7.3	0.173205
fda_ligand_1646.pdbqt	ZINC000003823492	arranon	-7.3	-7.2	-7.4	-7.3	0.1
fda_ligand_1861.pdbqt	ZINC000001543916	valganciclovir	-7.3	-7	-7.6	-7.3	0.3
fda_ligand_1886.pdbqt	ZINC000003833821	prdl	-7.2	-7.3	-7.4	-7.3	0.1
fda_ligand_1944.pdbqt	ZINC000000000347	granisetron	-7.2	-7.3	-7.4	-7.3	0.1
fda_ligand_0018.pdbqt	ZINC000095616601	prazosin	-7.3	-7.2	-7.3	-7.26667	0.057735
fda_ligand_0096.pdbqt	ZINC000003833846	nelfinavir	-7.4	-7.2	-7.2	-7.26667	0.11547
fda_ligand_0241.pdbqt	ZINC000004474414	calderol	-7.1	-7.4	-7.3	-7.26667	0.152753
fda_ligand_0292.pdbqt	ZINC000000004076	naratriptan	-7	-7.5	-7.3	-7.26667	0.251661
fda_ligand_0375.pdbqt	ZINC000003831490	azulfidine	-7.4	-7.2	-7.2	-7.26667	0.11547
fda_ligand_0567.pdbqt	ZINC000012503151	neptazane	-7.4	-7.1	-7.3	-7.26667	0.152753
fda_ligand_0727.pdbqt	ZINC000019796158	loxapine	-7.1	-7.4	-7.3	-7.26667	0.152753
fda_ligand_0728.pdbqt	ZINC000019796158	loxapine	-7.1	-7.4	-7.3	-7.26667	0.152753
fda_ligand_0732.pdbqt	ZINC000014879972	gar-936	-7.1	-7.5	-7.2	-7.26667	0.208167
fda_ligand_0792.pdbqt	ZINC000001481815	exjade	-7.4	-7.2	-7.2	-7.26667	0.11547
fda_ligand_0886.pdbqt	ZINC000001530947	thalomid	-7.3	-7.2	-7.3	-7.26667	0.057735
fda_ligand_0914.pdbqt	ZINC000002510358	phenytoin	-7.1	-7.2	-7.5	-7.26667	0.208167
fda_ligand_0953.pdbqt	ZINC000000538273	ofloxacin	-7.3	-7.2	-7.3	-7.26667	0.057735
fda_ligand_1077.pdbqt	ZINC000000057464	ZINC57464	-7.2	-7.2	-7.4	-7.26667	0.11547
fda_ligand_1079.pdbqt	ZINC000000896543	flecainide	-7.1	-7.4	-7.3	-7.26667	0.152753
fda_ligand_1322.pdbqt	ZINC000100004343	coartem	-7.2	-7.1	-7.5	-7.26667	0.208167
fda_ligand_1349.pdbqt	ZINC000008855117	hxr	-7.2	-7.3	-7.3	-7.26667	0.057735
fda_ligand_1374.pdbqt	ZINC000000537891	ofloxacin	-7.1	-7.4	-7.3	-7.26667	0.152753
fda_ligand_1375.pdbqt	ZINC000000537891	ofloxacin	-7.1	-7.4	-7.3	-7.26667	0.152753
fda_ligand_1407.pdbqt	ZINC000000895154	kuvan	-7.2	-7.4	-7.2	-7.26667	0.11547
fda_ligand_1451.pdbqt	ZINC000021303210	brimonidine	-6.9	-7.4	-7.5	-7.26667	0.321455
fda_ligand_1485.pdbqt	ZINC000003812983	morphine	-7.1	-7.4	-7.3	-7.26667	0.152753
fda_ligand_1500.pdbqt	ZINC000000896740	miconazole	-7.2	-7.3	-7.3	-7.26667	0.057735
fda_ligand_1560.pdbqt	ZINC000000001261	aerius	-7	-7.6	-7.2	-7.26667	0.305505
fda_ligand_1594.pdbqt	ZINC000019168887	carbidopa	-7	-7.3	-7.5	-7.26667	0.251661
fda_ligand_1609.pdbqt	ZINC000000035804	furosemide	-7.1	-7.5	-7.2	-7.26667	0.208167
fda_ligand_1895.pdbqt	ZINC000003978006	dicloxacillin	-7.4	-7.2	-7.2	-7.26667	0.11547
fda_ligand_1939.pdbqt	ZINC000095616937	dasabuvir	-7.3	-7.2	-7.3	-7.26667	0.057735
fda_ligand_1943.pdbqt	ZINC000000000347	granisetron	-7.2	-7.4	-7.2	-7.26667	0.11547
fda_ligand_2048.pdbqt	ZINC000000601317	difenoxin	-7.1	-7.5	-7.2	-7.26667	0.208167
fda_ligand_2100.pdbqt	ZINC000085537017	cangrelor	-7	-7.4	-7.4	-7.26667	0.23094
fda_ligand_0040.pdbqt	ZINC000026011099	omacetaxine mepesuccinate	-6.9	-7.8	-7.1	-7.26667	0.472582
fda_ligand_0260.pdbqt	ZINC000004228257	kuvan	-7.2	-7	-7.6	-7.26667	0.305505
fda_ligand_0716.pdbqt	ZINC000019796080	inapsine	-7.3	-7.1	-7.4	-7.26667	0.152753
fda_ligand_0862.pdbqt	ZINC000000013156	lamictal	-7.1	-7.3	-7.4	-7.26667	0.152753
fda_ligand_1037.pdbqt	ZINC000000009073	apomorphine	-7.3	-7.4	-7.1	-7.26667	0.152753
fda_ligand_1102.pdbqt	ZINC000000113382	chloramphenicol	-7.1	-7.3	-7.4	-7.26667	0.152753
fda_ligand_1339.pdbqt	ZINC000013520815	alora	-7.1	-7.3	-7.4	-7.26667	0.152753
fda_ligand_1676.pdbqt	ZINC000000001758	myfortic	-7.3	-7.1	-7.4	-7.26667	0.152753
fda_ligand_2047.pdbqt	ZINC000049637509	isavuconazonium	-6.8	-6.8	-8.2	-7.26667	0.80829
fda_ligand_0063.pdbqt	ZINC000000607986	ZINC607986	-7.3	-7	-7.4	-7.23333	0.208167
fda_ligand_0452.pdbqt	ZINC000000014864	vcz	-6.7	-7.1	-7.9	-7.23333	0.61101
fda_ligand_0936.pdbqt	ZINC000001530571	buspirone	-7	-7.3	-7.4	-7.23333	0.208167
fda_ligand_1029.pdbqt	ZINC000000643138	nizoral	-7.2	-7.4	-7.1	-7.23333	0.152753
fda_ligand_1587.pdbqt	ZINC000019203912	fluphenazine	-7.1	-7.2	-7.4	-7.23333	0.152753
fda_ligand_1713.pdbqt	ZINC000003801163	quinapril	-7.3	-7	-7.4	-7.23333	0.208167
fda_ligand_1819.pdbqt	ZINC000003813042	acetazolamide	-6.8	-7.5	-7.4	-7.23333	0.378594
fda_ligand_0093.pdbqt	ZINC000100013500	ZINC100013500	-7.2	-7.2	-7.3	-7.23333	0.057735
fda_ligand_0309.pdbqt	ZINC000000538275	raloxifene	-7.3	-7.2	-7.2	-7.23333	0.057735
fda_ligand_0337.pdbqt	ZINC000003875368	nitrofurantoin	-7.2	-7.2	-7.3	-7.23333	0.057735
fda_ligand_0338.pdbqt	ZINC000003875368	nitrofurantoin	-7.3	-7.2	-7.2	-7.23333	0.057735
fda_ligand_0956.pdbqt	ZINC000004097343	itc	-7.4	-7.1	-7.2	-7.23333	0.152753
fda_ligand_0984.pdbqt	ZINC000001997125	pomalyst	-7.2	-7.2	-7.3	-7.23333	0.057735
fda_ligand_1039.pdbqt	ZINC000000009073	apomorphine	-7.3	-7.3	-7.1	-7.23333	0.11547
fda_ligand_1067.pdbqt	ZINC000013540519	hydrocortisone	-7.2	-7.2	-7.3	-7.23333	0.057735
fda_ligand_1305.pdbqt	ZINC000094566093	doxazosin	-7.2	-7.2	-7.3	-7.23333	0.057735
fda_ligand_1335.pdbqt	ZINC000030690433	thiothixene	-7.3	-7.2	-7.2	-7.23333	0.057735
fda_ligand_1350.pdbqt	ZINC000008855117	hxr	-7.2	-7.3	-7.2	-7.23333	0.057735
fda_ligand_1409.pdbqt	ZINC000000895154	kuvan	-7.2	-7.3	-7.2	-7.23333	0.057735
fda_ligand_1537.pdbqt	ZINC000100037020	see	-7.1	-7.3	-7.3	-7.23333	0.11547
fda_ligand_1538.pdbqt	ZINC000100037020	see	-7.1	-7.3	-7.3	-7.23333	0.11547
fda_ligand_1917.pdbqt	ZINC000085432544	vinblastine	-6.6	-7.6	-7.5	-7.23333	0.550757
fda_ligand_2067.pdbqt	ZINC000003798537	prandin	-7.1	-7	-7.6	-7.23333	0.321455
fda_ligand_0219.pdbqt	ZINC000003872994	nizoral	-7.5	-7.1	-7	-7.2	0.264575
fda_ligand_0358.pdbqt	ZINC000026985532	sqv	-7.1	-7.2	-7.3	-7.2	0.1
fda_ligand_0414.pdbqt	ZINC000001280665	hydrocodone	-7	-7.3	-7.3	-7.2	0.173205
fda_ligand_0421.pdbqt	ZINC000003941496	atazanavir	-7.1	-7.5	-7	-7.2	0.264575
fda_ligand_0454.pdbqt	ZINC000000089763	gantanol	-7.2	-7.2	-7.2	-7.2	0
fda_ligand_0501.pdbqt	ZINC000100018854	ZINC100018854	-7.1	-7.2	-7.3	-7.2	0.1
fda_ligand_0581.pdbqt	ZINC000000537805	diabeta	-6.9	-7.6	-7.1	-7.2	0.360555
fda_ligand_0653.pdbqt	ZINC000003973334	aromasin	-7	-7.3	-7.3	-7.2	0.173205
fda_ligand_0754.pdbqt	ZINC000013682481	elvitegravir	-7.1	-7.4	-7.1	-7.2	0.173205
fda_ligand_0779.pdbqt	ZINC000019364230	cetirizine	-6.9	-7.3	-7.4	-7.2	0.264575
fda_ligand_0882.pdbqt	ZINC000004676424	pantoprazole	-7.2	-7.2	-7.2	-7.2	0
fda_ligand_0904.pdbqt	ZINC000002019953	articaine	-7.2	-7.2	-7.2	-7.2	0
fda_ligand_0982.pdbqt	ZINC000001996117	darifenacin	-7.6	-7	-7	-7.2	0.34641
fda_ligand_1291.pdbqt	ZINC000096006009	sulfisoxazole	-7	-7.4	-7.2	-7.2	0.2
fda_ligand_1336.pdbqt	ZINC000030690433	thiothixene	-7.2	-7.2	-7.2	-7.2	0
fda_ligand_1364.pdbqt	ZINC000000897240	azelastine	-7.1	-7.2	-7.3	-7.2	0.1
fda_ligand_1385.pdbqt	ZINC000002539827	kuvan	-7.2	-7.3	-7.1	-7.2	0.1
fda_ligand_1545.pdbqt	ZINC000000020251	phentolamine	-7	-7.4	-7.2	-7.2	0.2
fda_ligand_1644.pdbqt	ZINC000003812984	levorphanol	-7.2	-7.1	-7.3	-7.2	0.1
fda_ligand_1744.pdbqt	ZINC000003798757	altace	-7	-7.2	-7.4	-7.2	0.2
fda_ligand_1772.pdbqt	ZINC000003873296	oxistat	-6.8	-7.7	-7.1	-7.2	0.458258
fda_ligand_1874.pdbqt	ZINC000000621893	diltiazem	-6.9	-7.3	-7.4	-7.2	0.264575
fda_ligand_1881.pdbqt	ZINC000003795819	palonosetron	-7	-7.3	-7.3	-7.2	0.173205
fda_ligand_1927.pdbqt	ZINC000003940470	pomalyst	-7.2	-7.2	-7.2	-7.2	0
fda_ligand_2088.pdbqt	ZINC000034636383	olodaterol	-7.1	-7.1	-7.4	-7.2	0.173205
fda_ligand_0436.pdbqt	ZINC000000113428	tetrahydrozoline	-7.1	-7.3	-7.2	-7.2	0.1
fda_ligand_1208.pdbqt	ZINC000052957434	zyprexa	-7.1	-7.3	-7.2	-7.2	0.1
fda_ligand_1209.pdbqt	ZINC000052957434	zyprexa	-7.1	-7.3	-7.2	-7.2	0.1
fda_ligand_1294.pdbqt	ZINC000100022637	tpv	-6.6	-7.3	-7.7	-7.2	0.556776
fda_ligand_0041.pdbqt	ZINC000026011099	omacetaxine mepesuccinate	-7	-7.3	-7.2	-7.16667	0.152753
fda_ligand_0051.pdbqt	ZINC000000607939	isradipin	-7.4	-7.2	-6.9	-7.16667	0.251661
fda_ligand_0113.pdbqt	ZINC000000897251	donepezil	-7.1	-7.1	-7.3	-7.16667	0.11547
fda_ligand_0210.pdbqt	ZINC000053229445	rocuronium	-6.9	-7.4	-7.2	-7.16667	0.251661
fda_ligand_0274.pdbqt	ZINC000013585233	sapropterin	-6.9	-7.4	-7.2	-7.16667	0.251661
fda_ligand_0293.pdbqt	ZINC000000001899	penciclovir	-7.4	-7.5	-6.6	-7.16667	0.493288
fda_ligand_0360.pdbqt	ZINC000001530639	fluvastatin	-6.9	-7.3	-7.3	-7.16667	0.23094
fda_ligand_0393.pdbqt	ZINC000003782599	proscar	-7	-7.3	-7.2	-7.16667	0.152753
fda_ligand_0516.pdbqt	ZINC000100016084	trospium	-7	-7.2	-7.3	-7.16667	0.152753
fda_ligand_0668.pdbqt	ZINC000019364224	hydroxyzine	-6.8	-7.4	-7.3	-7.16667	0.321455
fda_ligand_0753.pdbqt	ZINC000013682481	elvitegravir	-7.1	-7.2	-7.2	-7.16667	0.057735
fda_ligand_0850.pdbqt	ZINC000000537795	glipizide	-7.1	-7.4	-7	-7.16667	0.208167
fda_ligand_0881.pdbqt	ZINC000004676424	pantoprazole	-7.1	-7.2	-7.2	-7.16667	0.057735
fda_ligand_1038.pdbqt	ZINC000000009073	apomorphine	-7.1	-7.3	-7.1	-7.16667	0.11547
fda_ligand_1074.pdbqt	ZINC000001886617	lescol	-7.3	-6.7	-7.5	-7.16667	0.416333
fda_ligand_1292.pdbqt	ZINC000096006009	sulfisoxazole	-6.9	-7.3	-7.3	-7.16667	0.23094
fda_ligand_1300.pdbqt	ZINC000005819214	rapivab	-7.1	-7.4	-7	-7.16667	0.208167
fda_ligand_1334.pdbqt	ZINC000030690433	thiothixene	-7.1	-7.2	-7.2	-7.16667	0.057735
fda_ligand_1365.pdbqt	ZINC000000897240	azelastine	-7	-7.2	-7.3	-7.16667	0.152753
fda_ligand_1406.pdbqt	ZINC000006858022	cholic acid	-7.1	-7.1	-7.3	-7.16667	0.11547
fda_ligand_1408.pdbqt	ZINC000000895154	kuvan	-7.3	-7.2	-7	-7.16667	0.152753
fda_ligand_1580.pdbqt	ZINC000019228902	pzc	-6.9	-7.3	-7.3	-7.16667	0.23094
fda_ligand_1717.pdbqt	ZINC000003812989	nalbuphine	-6.8	-7.4	-7.3	-7.16667	0.321455
fda_ligand_1920.pdbqt	ZINC000085432544	vinblastine	-6.5	-7.6	-7.4	-7.16667	0.585947
fda_ligand_1972.pdbqt	ZINC000002015035	l-dops	-7.1	-7.1	-7.3	-7.16667	0.11547
fda_ligand_1973.pdbqt	ZINC000002015035	l-dops	-7.1	-7.1	-7.3	-7.16667	0.11547
fda_ligand_1993.pdbqt	ZINC000006467621	ensulizole	-7.1	-7.3	-7.1	-7.16667	0.11547
fda_ligand_0019.pdbqt	ZINC000095616601	prazosin	-7.2	-7.1	-7.1	-7.13333	0.057735
fda_ligand_0043.pdbqt	ZINC000000005823	demadex	-7	-7.7	-6.7	-7.13333	0.51316
fda_ligand_0046.pdbqt	ZINC000000005823	demadex	-7	-7.2	-7.2	-7.13333	0.11547
fda_ligand_0064.pdbqt	ZINC000000607986	ZINC607986	-7.1	-7.2	-7.1	-7.13333	0.057735
fda_ligand_0114.pdbqt	ZINC000000897251	donepezil	-7.1	-7.1	-7.2	-7.13333	0.057735
fda_ligand_0211.pdbqt	ZINC000053229445	rocuronium	-6.8	-7.4	-7.2	-7.13333	0.305505
fda_ligand_0267.pdbqt	ZINC000003812851	enalaprilat	-7	-7.1	-7.3	-7.13333	0.152753
fda_ligand_0275.pdbqt	ZINC000013585233	sapropterin	-6.8	-7.4	-7.2	-7.13333	0.305505
fda_ligand_0394.pdbqt	ZINC000000075126	zofran	-7	-7.2	-7.2	-7.13333	0.11547
fda_ligand_0429.pdbqt	ZINC000018516586	delavirdine	-6.8	-7.7	-6.9	-7.13333	0.493288
fda_ligand_0455.pdbqt	ZINC000000089763	gantanol	-7	-7.5	-6.9	-7.13333	0.321455
fda_ligand_0575.pdbqt	ZINC000012503068	trosec	-7	-7.2	-7.2	-7.13333	0.11547
fda_ligand_0596.pdbqt	ZINC000003830500	cephalexin	-7.1	-7.1	-7.2	-7.13333	0.057735
fda_ligand_0626.pdbqt	ZINC000003795098	arac	-7.2	-7	-7.2	-7.13333	0.11547
fda_ligand_0710.pdbqt	ZINC000019632917	chlordiazepoxide	-7	-7.1	-7.3	-7.13333	0.152753
fda_ligand_0737.pdbqt	ZINC000014210455	victrelis	-6.9	-7.3	-7.2	-7.13333	0.208167
fda_ligand_0766.pdbqt	ZINC000006094354	aloxi	-7.1	-7.2	-7.1	-7.13333	0.057735
fda_ligand_0778.pdbqt	ZINC000019364230	cetirizine	-6.9	-7.4	-7.1	-7.13333	0.251661
fda_ligand_0827.pdbqt	ZINC000003938695	ZINC3938695	-7.1	-7	-7.3	-7.13333	0.152753
fda_ligand_0938.pdbqt	ZINC000002019954	articaine	-7.1	-7.1	-7.2	-7.13333	0.057735
fda_ligand_0975.pdbqt	ZINC000003808779	meropenem	-7.1	-6.8	-7.5	-7.13333	0.351188
fda_ligand_1095.pdbqt	ZINC000004097344	itc	-7.4	-6.9	-7.1	-7.13333	0.251661
fda_ligand_1119.pdbqt	ZINC000001530761	propantheline	-6.9	-7.3	-7.2	-7.13333	0.208167
fda_ligand_1167.pdbqt	ZINC000022116612	fenoldopam	-7	-7.3	-7.1	-7.13333	0.152753
fda_ligand_1184.pdbqt	ZINC000053683345	caprelsa	-7	-7.5	-6.9	-7.13333	0.321455
fda_ligand_1205.pdbqt	ZINC000052509463	vx-770	-7.1	-7.1	-7.2	-7.13333	0.057735
fda_ligand_1249.pdbqt	ZINC000118912393	testosterone	-7.1	-7.1	-7.2	-7.13333	0.057735
fda_ligand_1270.pdbqt	ZINC000012495062	pgx	-7.3	-7.3	-6.8	-7.13333	0.288675
fda_ligand_1320.pdbqt	ZINC000100001918	isradipin	-7.2	-7.1	-7.1	-7.13333	0.057735
fda_ligand_1401.pdbqt	ZINC000002169830	myocol	-7.1	-7.1	-7.2	-7.13333	0.057735
fda_ligand_1454.pdbqt	ZINC000003871703	bepreve	-7	-7.3	-7.1	-7.13333	0.152753
fda_ligand_1520.pdbqt	ZINC000000121541	mebendazole	-7.1	-7.1	-7.2	-7.13333	0.057735
fda_ligand_1682.pdbqt	ZINC000000403079	midodrine	-7.1	-7.1	-7.2	-7.13333	0.057735
fda_ligand_1690.pdbqt	ZINC000003819138	dapagliflozin	-7.2	-7	-7.2	-7.13333	0.11547
fda_ligand_1739.pdbqt	ZINC000003842753	viroptic	-7	-7.3	-7.1	-7.13333	0.152753
fda_ligand_1765.pdbqt	ZINC000003976838	afatinib	-7.1	-7.2	-7.1	-7.13333	0.057735
fda_ligand_1766.pdbqt	ZINC000003976838	afatinib	-7.1	-7.2	-7.1	-7.13333	0.057735
fda_ligand_1860.pdbqt	ZINC000001543916	valganciclovir	-7	-7.2	-7.2	-7.13333	0.11547
fda_ligand_0188.pdbqt	ZINC000005844788	ZINC5844788	-6.9	-7.4	-7	-7.1	0.264575
fda_ligand_0253.pdbqt	ZINC000000643143	nizoral	-7.1	-7.2	-7	-7.1	0.1
fda_ligand_0266.pdbqt	ZINC000003812851	enalaprilat	-7	-7.1	-7.2	-7.1	0.1
fda_ligand_0268.pdbqt	ZINC000003914810	degalol	-6.9	-7.1	-7.3	-7.1	0.2
fda_ligand_0318.pdbqt	ZINC000000004319	dilevalol	-7	-7.3	-7	-7.1	0.173205
fda_ligand_0556.pdbqt	ZINC000003787097	besifloxacin	-6.9	-7.2	-7.2	-7.1	0.173205
fda_ligand_0561.pdbqt	ZINC000003823475	eletriptan	-6.9	-7.2	-7.2	-7.1	0.173205
fda_ligand_0752.pdbqt	ZINC000013597823	videx	-6.8	-7.2	-7.3	-7.1	0.264575
fda_ligand_0870.pdbqt	ZINC000000601283	indomethacin	-6.8	-7.3	-7.2	-7.1	0.264575
fda_ligand_0957.pdbqt	ZINC000004097225	imipenem	-7.4	-7.1	-6.8	-7.1	0.3
fda_ligand_1076.pdbqt	ZINC000000057464	ZINC57464	-7.1	-7	-7.2	-7.1	0.1
fda_ligand_1311.pdbqt	ZINC000005844792	nebivolol	-7.4	-6.9	-7	-7.1	0.264575
fda_ligand_1392.pdbqt	ZINC000003914809	urso	-6.9	-7.1	-7.3	-7.1	0.2
fda_ligand_1502.pdbqt	ZINC000000643055	econazole	-7.1	-6.9	-7.3	-7.1	0.2
fda_ligand_1503.pdbqt	ZINC000000643055	econazole	-6.9	-7.2	-7.2	-7.1	0.173205
fda_ligand_1581.pdbqt	ZINC000019228902	pzc	-6.7	-7.3	-7.3	-7.1	0.34641
fda_ligand_1671.pdbqt	ZINC000001535101	rosuvastatin	-7.2	-6.9	-7.2	-7.1	0.173205
fda_ligand_1763.pdbqt	ZINC000003953037	azopt	-7	-7.1	-7.2	-7.1	0.1
fda_ligand_1786.pdbqt	ZINC000001843099	alfuzosin	-7	-7.4	-6.9	-7.1	0.264575
fda_ligand_1882.pdbqt	ZINC000003795819	palonosetron	-7	-7.1	-7.2	-7.1	0.1
fda_ligand_2006.pdbqt	ZINC000072318121	abemaciclib	-6.9	-7.5	-6.9	-7.1	0.34641
fda_ligand_2046.pdbqt	ZINC000049637509	isavuconazonium	-7.5	-6.8	-7	-7.1	0.360555
fda_ligand_0106.pdbqt	ZINC000003813010	fluorodeoxyuridine	-7.1	-7.3	-6.9	-7.1	0.2
fda_ligand_0542.pdbqt	ZINC000013986658	idelalisib	-7	-7.2	-7.1	-7.1	0.1
fda_ligand_0669.pdbqt	ZINC000019364224	hydroxyzine	-6.8	-7.4	-7.1	-7.1	0.3
fda_ligand_0825.pdbqt	ZINC000003831128	ZINC3831128	-6.9	-7.3	-7.1	-7.1	0.2
fda_ligand_1100.pdbqt	ZINC000000057146	ZINC57146	-7.1	-7.1	-7.1	-7.1	0
fda_ligand_1445.pdbqt	ZINC000000000596	pentazocine	-6.9	-7.3	-7.1	-7.1	0.2
fda_ligand_1616.pdbqt	ZINC000000601229	azelastine	-7	-7.2	-7.1	-7.1	0.1
fda_ligand_2001.pdbqt	ZINC000028973446	clorazepate	-7.1	-7.1	-7.1	-7.1	0
fda_ligand_2077.pdbqt	ZINC000003993846	ixabepilone	-7	-7.2	-7.1	-7.1	0.1
fda_ligand_0254.pdbqt	ZINC000000643143	nizoral	-6.9	-7.4	-6.9	-7.06667	0.288675
fda_ligand_0684.pdbqt	ZINC000001530688	maprotiline	-6.9	-7.2	-7.1	-7.06667	0.152753
fda_ligand_0777.pdbqt	ZINC000019364230	cetirizine	-6.7	-7.4	-7.1	-7.06667	0.351188
fda_ligand_1312.pdbqt	ZINC000005844792	nebivolol	-7.4	-6.9	-6.9	-7.06667	0.288675
fda_ligand_1483.pdbqt	ZINC000036766734	ZINC36766734	-6.9	-7.2	-7.1	-7.06667	0.152753
fda_ligand_1863.pdbqt	ZINC000001548097	fanapt	-7.2	-6.9	-7.1	-7.06667	0.152753
fda_ligand_0028.pdbqt	ZINC000002548959	ZINC2548959	-7.1	-7	-7.1	-7.06667	0.057735
fda_ligand_0079.pdbqt	ZINC000000002299	ZINC2299	-7	-7.1	-7.1	-7.06667	0.057735
fda_ligand_0120.pdbqt	ZINC000003830569	clavulanate	-6.8	-7.2	-7.2	-7.06667	0.23094
fda_ligand_0127.pdbqt	ZINC000019632713	nimotop	-7.1	-7	-7.1	-7.06667	0.057735
fda_ligand_0189.pdbqt	ZINC000005844788	ZINC5844788	-7.1	-6.9	-7.2	-7.06667	0.152753
fda_ligand_0218.pdbqt	ZINC000003872994	nizoral	-7.5	-6.9	-6.8	-7.06667	0.378594
fda_ligand_0265.pdbqt	ZINC000003807917	astenile	-7	-7.1	-7.1	-7.06667	0.057735
fda_ligand_0273.pdbqt	ZINC000013585233	sapropterin	-7.1	-6.9	-7.2	-7.06667	0.152753
fda_ligand_0355.pdbqt	ZINC000002000707	lodoxamide	-7.2	-6.8	-7.2	-7.06667	0.23094
fda_ligand_0444.pdbqt	ZINC000066166864	alectinib	-7	-7.1	-7.1	-7.06667	0.057735
fda_ligand_0445.pdbqt	ZINC000066166864	alectinib	-7	-7.1	-7.1	-7.06667	0.057735
fda_ligand_0477.pdbqt	ZINC000000002272	ketoprofen	-6.9	-7.3	-7	-7.06667	0.208167
fda_ligand_0597.pdbqt	ZINC000003830500	cephalexin	-7	-7.1	-7.1	-7.06667	0.057735
fda_ligand_0620.pdbqt	ZINC000012661824	airol	-6.9	-7.1	-7.2	-7.06667	0.152753
fda_ligand_0830.pdbqt	ZINC000410428674	ZINC410428674	-7	-7.1	-7.1	-7.06667	0.057735
fda_ligand_0836.pdbqt	ZINC000004099200	pantoprazole	-7.1	-7	-7.1	-7.06667	0.057735
fda_ligand_1115.pdbqt	ZINC000019632614	iressa	-6.9	-7.1	-7.2	-7.06667	0.152753
fda_ligand_1152.pdbqt	ZINC000000001728	metyrapone	-7	-6.9	-7.3	-7.06667	0.208167
fda_ligand_1195.pdbqt	ZINC000095619105	methylergonovine	-7	-7.1	-7.1	-7.06667	0.057735
fda_ligand_1196.pdbqt	ZINC000095619105	methylergonovine	-7	-7.1	-7.1	-7.06667	0.057735
fda_ligand_1201.pdbqt	ZINC000060325170	cobimetinib	-7.2	-7	-7	-7.06667	0.11547
fda_ligand_1559.pdbqt	ZINC000035328014	ibrutinib	-6.8	-7.3	-7.1	-7.06667	0.251661
fda_ligand_1567.pdbqt	ZINC000000000507	midodrine	-7	-7.1	-7.1	-7.06667	0.057735
fda_ligand_1776.pdbqt	ZINC000000403011	labetalol	-6.9	-7.1	-7.2	-7.06667	0.152753
fda_ligand_1791.pdbqt	ZINC000000622123	gris-peg	-7	-7.1	-7.1	-7.06667	0.057735
fda_ligand_1894.pdbqt	ZINC000003938744	beclometasone	-7	-7.2	-7	-7.06667	0.11547
fda_ligand_1936.pdbqt	ZINC000098023177	ZINC98023177	-6.9	-7.1	-7.2	-7.06667	0.152753
fda_ligand_1937.pdbqt	ZINC000098023177	ZINC98023177	-7.4	-6.8	-7	-7.06667	0.305505
fda_ligand_2051.pdbqt	ZINC000003806104	tirofiban	-7.2	-7	-7	-7.06667	0.11547
fda_ligand_0009.pdbqt	ZINC000003607120	zymar	-7	-7.1	-7	-7.03333	0.057735
fda_ligand_0052.pdbqt	ZINC000000608382	flavoxate	-6.6	-7.2	-7.3	-7.03333	0.378594
fda_ligand_0173.pdbqt	ZINC000022851765	eovist	-7.1	-6.7	-7.3	-7.03333	0.305505
fda_ligand_0178.pdbqt	ZINC000028639340	noxafil	-6.8	-7.3	-7	-7.03333	0.251661
fda_ligand_0196.pdbqt	ZINC000003800008	dostinex	-7	-7	-7.1	-7.03333	0.057735
fda_ligand_0216.pdbqt	ZINC000068204830	daclatasvir	-7	-6.8	-7.3	-7.03333	0.251661
fda_ligand_0404.pdbqt	ZINC000000968328	rosiglitazone	-6.8	-7.2	-7.1	-7.03333	0.208167
fda_ligand_0446.pdbqt	ZINC000000897408	casodex	-6.9	-7.1	-7.1	-7.03333	0.11547
fda_ligand_0480.pdbqt	ZINC000011677857	stendra	-6.8	-6.8	-7.5	-7.03333	0.404145
fda_ligand_0592.pdbqt	ZINC000011726211	lastacaft	-7	-7.1	-7	-7.03333	0.057735
fda_ligand_0593.pdbqt	ZINC000011726211	lastacaft	-7	-7.1	-7	-7.03333	0.057735
fda_ligand_0598.pdbqt	ZINC000003871701	pfizerpen	-6.9	-7	-7.2	-7.03333	0.152753
fda_ligand_0601.pdbqt	ZINC000040899447	erivedge	-7.1	-6.9	-7.1	-7.03333	0.11547
fda_ligand_0673.pdbqt	ZINC000002015928	abacavir	-6.9	-7.1	-7.1	-7.03333	0.11547
fda_ligand_0674.pdbqt	ZINC000003951740	lpv	-6.9	-6.9	-7.3	-7.03333	0.23094
fda_ligand_0712.pdbqt	ZINC000019796155	clozapine	-7	-7.1	-7	-7.03333	0.057735
fda_ligand_0767.pdbqt	ZINC000006094354	aloxi	-7	-7.1	-7	-7.03333	0.057735
fda_ligand_0851.pdbqt	ZINC000000537795	glipizide	-7	-7.3	-6.8	-7.03333	0.251661
fda_ligand_0877.pdbqt	ZINC000004655029	bedaquiline	-7.1	-6.7	-7.3	-7.03333	0.305505
fda_ligand_0985.pdbqt	ZINC000001997127	imid3	-6.9	-7.1	-7.1	-7.03333	0.11547
fda_ligand_0992.pdbqt	ZINC000003986735	sprycel	-6.9	-7.3	-6.9	-7.03333	0.23094
fda_ligand_1614.pdbqt	ZINC000000601229	azelastine	-7	-7	-7.1	-7.03333	0.057735
fda_ligand_1615.pdbqt	ZINC000000601229	azelastine	-7	-7	-7.1	-7.03333	0.057735
fda_ligand_1674.pdbqt	ZINC000000000931	amoxapine	-6.9	-7.1	-7.1	-7.03333	0.11547
fda_ligand_1675.pdbqt	ZINC000000000931	amoxapine	-6.9	-7.1	-7.1	-7.03333	0.11547
fda_ligand_1725.pdbqt	ZINC000000011012	ketorolac	-6.9	-7.2	-7	-7.03333	0.152753
fda_ligand_1748.pdbqt	ZINC000003813083	cantil	-6.8	-7.2	-7.1	-7.03333	0.208167
fda_ligand_1836.pdbqt	ZINC000000000575	oxazepam	-6.9	-7.1	-7.1	-7.03333	0.11547
fda_ligand_1983.pdbqt	ZINC000003876069	methohexital	-6.9	-7	-7.2	-7.03333	0.152753
fda_ligand_1984.pdbqt	ZINC000003876069	methohexital	-6.9	-7	-7.2	-7.03333	0.152753
fda_ligand_2012.pdbqt	ZINC000000006251	efinaconazole	-6.9	-7	-7.2	-7.03333	0.152753
fda_ligand_2049.pdbqt	ZINC000003794794	mitoxantrone	-7	-7.1	-7	-7.03333	0.057735
fda_ligand_2052.pdbqt	ZINC000003812869	cefaclor	-7.1	-6.9	-7.1	-7.03333	0.11547
fda_ligand_2094.pdbqt	ZINC000150338699	visudyne	-6.8	-6.8	-7.5	-7.03333	0.404145
fda_ligand_1114.pdbqt	ZINC000016929327	azadc	-6.8	-7.6	-6.7	-7.03333	0.493288
fda_ligand_0055.pdbqt	ZINC000002568036	dantrolene	-7	-7	-7	-7	0
fda_ligand_0062.pdbqt	ZINC000000025958	rucaparib	-7.1	-6.8	-7.1	-7	0.173205
fda_ligand_0165.pdbqt	ZINC000001482049	droxidopa	-6.8	-7.1	-7.1	-7	0.173205
fda_ligand_0308.pdbqt	ZINC000019796087	nicardipine	-7.2	-6.9	-6.9	-7	0.173205
fda_ligand_0343.pdbqt	ZINC000252679615	ZINC252679615	-7	-7	-7	-7	0
fda_ligand_0370.pdbqt	ZINC000000020220	ciprofloxacin	-6.5	-7.3	-7.2	-7	0.43589
fda_ligand_0396.pdbqt	ZINC000003931840	altabax	-7.1	-6.7	-7.2	-7	0.264575
fda_ligand_0491.pdbqt	ZINC000001999441	ZINC1999441	-7.1	-7.6	-6.3	-7	0.655744
fda_ligand_0518.pdbqt	ZINC000001542199	avage	-6.9	-7.1	-7	-7	0.1
fda_ligand_0546.pdbqt	ZINC000003876023	ZINC3876023	-6.8	-7.2	-7	-7	0.2
fda_ligand_0711.pdbqt	ZINC000019632917	chlordiazepoxide	-7	-7.1	-6.9	-7	0.1
fda_ligand_0713.pdbqt	ZINC000019796155	clozapine	-7	-7	-7	-7	0
fda_ligand_0751.pdbqt	ZINC000013597823	videx	-6.8	-7.2	-7	-7	0.2
fda_ligand_0773.pdbqt	ZINC000019419017	magnevist	-6.8	-7.1	-7.1	-7	0.173205
fda_ligand_0852.pdbqt	ZINC000000537928	loperamide	-7	-6.7	-7.3	-7	0.3
fda_ligand_0896.pdbqt	ZINC000001530764	protriptyline	-6.7	-7.2	-7.1	-7	0.264575
fda_ligand_0901.pdbqt	ZINC000004097309	ZINC4097309	-7	-6.8	-7.2	-7	0.2
fda_ligand_0991.pdbqt	ZINC000003986735	sprycel	-6.9	-7.2	-6.9	-7	0.173205
fda_ligand_1049.pdbqt	ZINC000000002159	ldt	-6.9	-7.1	-7	-7	0.1
fda_ligand_1228.pdbqt	ZINC000000606383	sertaconazole	-7.1	-6.9	-7	-7	0.1
fda_ligand_1363.pdbqt	ZINC000000897240	azelastine	-7	-7	-7	-7	0
fda_ligand_1461.pdbqt	ZINC000000403010	labetalol	-6.6	-7.2	-7.2	-7	0.34641
fda_ligand_1618.pdbqt	ZINC000000004009	diflucan	-6.9	-7.1	-7	-7	0.1
fda_ligand_1697.pdbqt	ZINC000003781943	benazepril	-6.7	-7.2	-7.1	-7	0.264575
fda_ligand_1761.pdbqt	ZINC000001999487	epinastine	-6.9	-7	-7.1	-7	0.1
fda_ligand_1862.pdbqt	ZINC000001548097	fanapt	-6.8	-6.8	-7.4	-7	0.34641
fda_ligand_1872.pdbqt	ZINC000000105216	naproxen	-7.1	-7	-6.9	-7	0.1
fda_ligand_1875.pdbqt	ZINC000000621893	diltiazem	-6.8	-7.1	-7.1	-7	0.173205
fda_ligand_1884.pdbqt	ZINC000003830321	bisacodyl	-6.6	-7	-7.4	-7	0.4
fda_ligand_1995.pdbqt	ZINC000007997966	ZINC7997966	-7	-7	-7	-7	0
fda_ligand_1996.pdbqt	ZINC000007997966	ZINC7997966	-7	-7	-7	-7	0
fda_ligand_2013.pdbqt	ZINC000000006251	efinaconazole	-6.9	-6.9	-7.2	-7	0.173205
fda_ligand_2039.pdbqt	ZINC000033965961	ZINC33965961	-6.8	-7.3	-6.9	-7	0.264575
fda_ligand_2053.pdbqt	ZINC000003812869	cefaclor	-7	-7	-7	-7	0
fda_ligand_0310.pdbqt	ZINC000000538275	raloxifene	-6.9	-6.7	-7.3	-6.96667	0.305505
fda_ligand_1293.pdbqt	ZINC000100022637	tpv	-6.7	-6.9	-7.3	-6.96667	0.305505
fda_ligand_0053.pdbqt	ZINC000000608382	flavoxate	-6.6	-7	-7.3	-6.96667	0.351188
fda_ligand_0054.pdbqt	ZINC000002568036	dantrolene	-6.9	-7	-7	-6.96667	0.057735
fda_ligand_0183.pdbqt	ZINC000001543873	shh	-7.3	-7.1	-6.5	-6.96667	0.416333
fda_ligand_0197.pdbqt	ZINC000003830347	butalbital	-6.9	-7	-7	-6.96667	0.057735
fda_ligand_0198.pdbqt	ZINC000003830347	butalbital	-6.9	-7	-7	-6.96667	0.057735
fda_ligand_0306.pdbqt	ZINC000019796087	nicardipine	-7	-6.8	-7.1	-6.96667	0.152753
fda_ligand_0342.pdbqt	ZINC000252679615	ZINC252679615	-6.9	-7	-7	-6.96667	0.057735
fda_ligand_0412.pdbqt	ZINC000003806262	ZINC3806262	-6.9	-7	-7	-6.96667	0.057735
fda_ligand_0422.pdbqt	ZINC000004215736	dihydrocodeine	-6.7	-7.1	-7.1	-6.96667	0.23094
fda_ligand_0423.pdbqt	ZINC000004215736	dihydrocodeine	-6.7	-7.1	-7.1	-6.96667	0.23094
fda_ligand_0428.pdbqt	ZINC000018516586	delavirdine	-6.6	-7.7	-6.6	-6.96667	0.635085
fda_ligand_0434.pdbqt	ZINC000000006300	sonata	-7	-6.9	-7	-6.96667	0.057735
fda_ligand_0478.pdbqt	ZINC000000002279	ketorolac	-6.8	-7	-7.1	-6.96667	0.152753
fda_ligand_0493.pdbqt	ZINC000003818808	tofacitinib	-6.9	-7	-7	-6.96667	0.057735
fda_ligand_0519.pdbqt	ZINC000003604264	imid3	-7	-6.9	-7	-6.96667	0.057735
fda_ligand_0757.pdbqt	ZINC000019594557	meclizine	-6.9	-7	-7	-6.96667	0.057735
fda_ligand_0769.pdbqt	ZINC000019364242	edt	-6.8	-7.1	-7	-6.96667	0.152753
fda_ligand_0790.pdbqt	ZINC000001530713	valacyclovir	-7.1	-6.6	-7.2	-6.96667	0.321455
fda_ligand_0837.pdbqt	ZINC000004099200	pantoprazole	-7	-7.1	-6.8	-6.96667	0.152753
fda_ligand_0868.pdbqt	ZINC000000601281	alfentanil	-6.9	-7	-7	-6.96667	0.057735
fda_ligand_0885.pdbqt	ZINC000001530973	butoconazole	-6.5	-6.9	-7.5	-6.96667	0.503322
fda_ligand_1000.pdbqt	ZINC000000527386	paroxetine	-7	-6.9	-7	-6.96667	0.057735
fda_ligand_1031.pdbqt	ZINC000005162311	ilevro	-7	-7.2	-6.7	-6.96667	0.251661
fda_ligand_1116.pdbqt	ZINC000019632614	iressa	-6.9	-7	-7	-6.96667	0.057735
fda_ligand_1289.pdbqt	ZINC000095616599	terazosin	-6.8	-7.1	-7	-6.96667	0.152753
fda_ligand_1314.pdbqt	ZINC000100055899	tenofovir alafenamide	-6.9	-7.1	-6.9	-6.96667	0.11547
fda_ligand_1326.pdbqt	ZINC000095616600	terazosin	-6.8	-7	-7.1	-6.96667	0.152753
fda_ligand_1450.pdbqt	ZINC000021303210	brimonidine	-7	-6.7	-7.2	-6.96667	0.251661
fda_ligand_1510.pdbqt	ZINC000000607971	miconazole	-6.9	-7	-7	-6.96667	0.057735
fda_ligand_1542.pdbqt	ZINC000035902489	xalkori	-6.8	-7	-7.1	-6.96667	0.152753
fda_ligand_1579.pdbqt	ZINC000019228902	pzc	-6.8	-7.1	-7	-6.96667	0.152753
fda_ligand_1815.pdbqt	ZINC000000001850	olopatadine	-6.7	-7.2	-7	-6.96667	0.251661
fda_ligand_1955.pdbqt	ZINC000001530929	methohexital	-6.7	-7.1	-7.1	-6.96667	0.23094
fda_ligand_1956.pdbqt	ZINC000001530929	methohexital	-6.7	-7.1	-7.1	-6.96667	0.23094
fda_ligand_1981.pdbqt	ZINC000003876068	methohexital	-6.9	-7	-7	-6.96667	0.057735
fda_ligand_2027.pdbqt	ZINC000011681534	nebivolol	-6.2	-7.3	-7.4	-6.96667	0.665833
fda_ligand_2030.pdbqt	ZINC000021982937	multihance	-6.9	-7	-7	-6.96667	0.057735
fda_ligand_0031.pdbqt	ZINC000003831404	quinine	-6.8	-7	-7	-6.93333	0.11547
fda_ligand_0032.pdbqt	ZINC000003831404	quinine	-6.8	-7	-7	-6.93333	0.11547
fda_ligand_0080.pdbqt	ZINC000000002299	ZINC2299	-6.9	-6.9	-7	-6.93333	0.057735
fda_ligand_0194.pdbqt	ZINC000003800008	dostinex	-7.2	-6.6	-7	-6.93333	0.305505
fda_ligand_0304.pdbqt	ZINC000084400879	nicardipine	-6.8	-7	-7	-6.93333	0.11547
fda_ligand_0305.pdbqt	ZINC000084400879	nicardipine	-6.8	-7	-7	-6.93333	0.11547
fda_ligand_0411.pdbqt	ZINC000003806262	ZINC3806262	-6.8	-7	-7	-6.93333	0.11547
fda_ligand_0607.pdbqt	ZINC000003914808	chenodal	-6.9	-7	-6.9	-6.93333	0.057735
fda_ligand_0829.pdbqt	ZINC000084758235	telotristat	-6.6	-7	-7.2	-6.93333	0.305505
fda_ligand_0952.pdbqt	ZINC000004213946	nebivolol	-6.9	-7.7	-6.2	-6.93333	0.750555
fda_ligand_0972.pdbqt	ZINC000003782807	nedocromil	-6.7	-7.2	-6.9	-6.93333	0.251661
fda_ligand_1069.pdbqt	ZINC000000057522	ting	-6.7	-7.1	-7	-6.93333	0.208167
fda_ligand_1153.pdbqt	ZINC000000000856	formoterol	-6.7	-7.1	-7	-6.93333	0.208167
fda_ligand_1185.pdbqt	ZINC000049643479	oxaprozin	-6.8	-7	-7	-6.93333	0.11547
fda_ligand_1286.pdbqt	ZINC000029319828	eprosartan	-6.9	-7	-6.9	-6.93333	0.057735
fda_ligand_1329.pdbqt	ZINC000095619100	ranolazine	-6.9	-6.9	-7	-6.93333	0.057735
fda_ligand_1414.pdbqt	ZINC000000001587	isocarboxazide	-7	-6.9	-6.9	-6.93333	0.057735
fda_ligand_1429.pdbqt	ZINC000000897385	vagistat-1	-6.9	-6.7	-7.2	-6.93333	0.251661
fda_ligand_1490.pdbqt	ZINC000000000416	labetalol	-6.8	-6.8	-7.2	-6.93333	0.23094
fda_ligand_1540.pdbqt	ZINC000000518554	arbutin	-6.7	-7.1	-7	-6.93333	0.208167
fda_ligand_1691.pdbqt	ZINC000003830579	clidinium	-6.7	-7.1	-7	-6.93333	0.208167
fda_ligand_1704.pdbqt	ZINC000003831139	modafinil	-6.6	-6.9	-7.3	-6.93333	0.351188
fda_ligand_1719.pdbqt	ZINC000003806721	codeine	-6.7	-7.1	-7	-6.93333	0.208167
fda_ligand_1773.pdbqt	ZINC000003873296	oxistat	-6.5	-7.1	-7.2	-6.93333	0.378594
fda_ligand_1851.pdbqt	ZINC000000018087	almotriptan	-6.2	-7.6	-7	-6.93333	0.702377
fda_ligand_1958.pdbqt	ZINC000001530930	methohexital	-6.7	-6.9	-7.2	-6.93333	0.251661
fda_ligand_2031.pdbqt	ZINC000021982937	multihance	-6.7	-7.1	-7	-6.93333	0.208167
fda_ligand_2038.pdbqt	ZINC000029571072	isavuconazonium	-6.4	-7.2	-7.2	-6.93333	0.46188
fda_ligand_0192.pdbqt	ZINC000100008319	ZINC100008319	-7.1	-6.6	-7.1	-6.93333	0.288675
fda_ligand_0379.pdbqt	ZINC000003806413	r340	-6.8	-7.1	-6.9	-6.93333	0.152753
fda_ligand_0863.pdbqt	ZINC000000013156	lamictal	-6.7	-7	-7.1	-6.93333	0.208167
fda_ligand_0974.pdbqt	ZINC000003800475	treprostinil	-6.6	-7.1	-7.1	-6.93333	0.288675
fda_ligand_2037.pdbqt	ZINC000029571072	isavuconazonium	-7.3	-7.1	-6.4	-6.93333	0.472582
fda_ligand_0042.pdbqt	ZINC000000005560	ketoprofen	-6.8	-7	-6.9	-6.9	0.1
fda_ligand_0076.pdbqt	ZINC000053084692	safinamide	-6.6	-7.2	-6.9	-6.9	0.3
fda_ligand_0112.pdbqt	ZINC000019632718	nimotop	-6.9	-6.9	-6.9	-6.9	0
fda_ligand_0667.pdbqt	ZINC000019364224	hydroxyzine	-6.7	-7.1	-6.9	-6.9	0.2
fda_ligand_0756.pdbqt	ZINC000019594557	meclizine	-6.9	-6.9	-6.9	-6.9	0
fda_ligand_0781.pdbqt	ZINC000019418959	trifluoperazine	-6.9	-6.9	-6.9	-6.9	0
fda_ligand_0874.pdbqt	ZINC000004618208	rabeprazole	-6.8	-7	-6.9	-6.9	0.1
fda_ligand_0895.pdbqt	ZINC000001530759	rythmol	-6.7	-7.1	-6.9	-6.9	0.2
fda_ligand_1319.pdbqt	ZINC000095626706	midazolam	-6.7	-6.9	-7.1	-6.9	0.2
fda_ligand_1480.pdbqt	ZINC000000509440	oxazepam	-6.8	-7	-6.9	-6.9	0.1
fda_ligand_1489.pdbqt	ZINC000000000449	cantil	-6.7	-6.9	-7.1	-6.9	0.2
fda_ligand_1539.pdbqt	ZINC000100037020	see	-6.7	-7.1	-6.9	-6.9	0.2
fda_ligand_1753.pdbqt	ZINC000001849548	ihd	-6.9	-6.9	-6.9	-6.9	0
fda_ligand_1932.pdbqt	ZINC000043195697	valbenazine	-6.9	-6.7	-7.1	-6.9	0.2
fda_ligand_1938.pdbqt	ZINC000085205451	ZINC85205451	-6.8	-7	-6.9	-6.9	0.1
fda_ligand_1957.pdbqt	ZINC000001530930	methohexital	-6.7	-6.9	-7.1	-6.9	0.2
fda_ligand_2029.pdbqt	ZINC000021982937	multihance	-6.9	-6.7	-7.1	-6.9	0.2
fda_ligand_2062.pdbqt	ZINC000003826253	moxifloxacin	-6.9	-6.9	-6.9	-6.9	0
fda_ligand_0083.pdbqt	ZINC000001554010	gabapentin	-6.8	-6.9	-7	-6.9	0.1
fda_ligand_0190.pdbqt	ZINC000253498282	ZINC253498282	-6.6	-7.1	-7	-6.9	0.264575
fda_ligand_0223.pdbqt	ZINC000001546066	erlotinib	-7	-6.9	-6.8	-6.9	0.1
fda_ligand_0354.pdbqt	ZINC000026664090	sqv	-6.1	-7.1	-7.5	-6.9	0.72111
fda_ligand_0453.pdbqt	ZINC000000016154	potiga	-6.6	-7	-7.1	-6.9	0.264575
fda_ligand_0499.pdbqt	ZINC000013973998	gabapentin	-6.8	-6.8	-7.1	-6.9	0.173205
fda_ligand_0560.pdbqt	ZINC000003823475	eletriptan	-7	-7	-6.7	-6.9	0.173205
fda_ligand_0782.pdbqt	ZINC000019418959	trifluoperazine	-6.9	-6.8	-7	-6.9	0.1
fda_ligand_1012.pdbqt	ZINC000003831531	tiagabine	-6.7	-7	-7	-6.9	0.173205
fda_ligand_1087.pdbqt	ZINC000001530579	coreg	-6.9	-7	-6.8	-6.9	0.1
fda_ligand_1323.pdbqt	ZINC000100004345	coartem	-6.7	-7	-7	-6.9	0.173205
fda_ligand_1328.pdbqt	ZINC000095619100	ranolazine	-6.6	-7.1	-7	-6.9	0.264575
fda_ligand_1541.pdbqt	ZINC000035902489	xalkori	-6.7	-7	-7	-6.9	0.173205
fda_ligand_1664.pdbqt	ZINC000000002191	tolmetin	-6.7	-7	-7	-6.9	0.173205
fda_ligand_1702.pdbqt	ZINC000003816514	rolapitant	-6.8	-6.9	-7	-6.9	0.1
fda_ligand_1754.pdbqt	ZINC000001853205	mavik	-7.2	-6.7	-6.8	-6.9	0.264575
fda_ligand_1797.pdbqt	ZINC000085555528	ZINC85555528	-6.8	-6.8	-7.1	-6.9	0.173205
fda_ligand_1801.pdbqt	ZINC000001530625	thc	-6.7	-7	-7	-6.9	0.173205
fda_ligand_1834.pdbqt	ZINC000043202140	opsumit	-6.8	-7.1	-6.8	-6.9	0.173205
fda_ligand_1859.pdbqt	ZINC000001543475	tdf	-6.7	-7.2	-6.8	-6.9	0.264575
fda_ligand_1982.pdbqt	ZINC000003876068	methohexital	-6.7	-7	-7	-6.9	0.173205
fda_ligand_2083.pdbqt	ZINC000100016058	tipranavir	-6.6	-7.4	-6.7	-6.9	0.43589
fda_ligand_0044.pdbqt	ZINC000000005823	demadex	-6.8	-6.8	-7	-6.86667	0.11547
fda_ligand_0256.pdbqt	ZINC000004474460	ZINC4474460	-6.7	-7.1	-6.8	-6.86667	0.208167
fda_ligand_0290.pdbqt	ZINC000000000346	cuvposa	-6.7	-7	-6.9	-6.86667	0.152753
fda_ligand_0303.pdbqt	ZINC000084400879	nicardipine	-6.7	-7	-6.9	-6.86667	0.152753
fda_ligand_0325.pdbqt	ZINC000004693575	omeprazole	-6.7	-7	-6.9	-6.86667	0.152753
fda_ligand_0365.pdbqt	ZINC000004217732	lubiprostone	-7	-7	-6.6	-6.86667	0.23094
fda_ligand_0378.pdbqt	ZINC000003806413	r340	-6.7	-7.1	-6.8	-6.86667	0.208167
fda_ligand_0388.pdbqt	ZINC000013545636	pentobarbital	-6.8	-6.9	-6.9	-6.86667	0.057735
fda_ligand_0389.pdbqt	ZINC000013545636	pentobarbital	-6.8	-6.9	-6.9	-6.86667	0.057735
fda_ligand_0494.pdbqt	ZINC000003873295	oxiconazole	-6.7	-7	-6.9	-6.86667	0.152753
fda_ligand_0559.pdbqt	ZINC000003823475	eletriptan	-7.1	-6.5	-7	-6.86667	0.321455
fda_ligand_0583.pdbqt	ZINC000000537805	diabeta	-6.7	-7	-6.9	-6.86667	0.152753
fda_ligand_0617.pdbqt	ZINC000001532525	arginine	-6.9	-6.9	-6.8	-6.86667	0.057735
fda_ligand_0652.pdbqt	ZINC000003964126	xarelto	-6.7	-7.2	-6.7	-6.86667	0.288675
fda_ligand_0681.pdbqt	ZINC000001482184	temodal	-6.8	-6.9	-6.9	-6.86667	0.057735
fda_ligand_0770.pdbqt	ZINC000019364242	edt	-6.8	-7	-6.8	-6.86667	0.11547
fda_ligand_0780.pdbqt	ZINC000019418959	trifluoperazine	-6.9	-6.7	-7	-6.86667	0.152753
fda_ligand_0866.pdbqt	ZINC000000001464	romazicon	-6.8	-6.8	-7	-6.86667	0.11547
fda_ligand_0905.pdbqt	ZINC000085537053	docetaxel	-7.4	-6.3	-6.9	-6.86667	0.550757
fda_ligand_0981.pdbqt	ZINC000001996117	darifenacin	-6.6	-6.9	-7.1	-6.86667	0.251661
fda_ligand_1080.pdbqt	ZINC000000896634	restoril	-6.9	-6.9	-6.8	-6.86667	0.057735
fda_ligand_1088.pdbqt	ZINC000001530579	coreg	-7.2	-6.5	-6.9	-6.86667	0.351188
fda_ligand_1103.pdbqt	ZINC000000113382	chloramphenicol	-6.7	-6.9	-7	-6.86667	0.152753
fda_ligand_1225.pdbqt	ZINC000034051848	vortioxetine	-6.5	-7.4	-6.7	-6.86667	0.472582
fda_ligand_1226.pdbqt	ZINC000000601316	clidinium	-6.8	-6.9	-6.9	-6.86667	0.057735
fda_ligand_1227.pdbqt	ZINC000000606383	sertaconazole	-7	-6.9	-6.7	-6.86667	0.152753
fda_ligand_1285.pdbqt	ZINC000029319828	eprosartan	-6.7	-6.8	-7.1	-6.86667	0.208167
fda_ligand_1415.pdbqt	ZINC000000000740	restoril	-6.8	-6.9	-6.9	-6.86667	0.057735
fda_ligand_1570.pdbqt	ZINC000008214625	nitroglycerin	-6.8	-6.9	-6.9	-6.86667	0.057735
fda_ligand_1607.pdbqt	ZINC000000014360	imigran	-6.8	-7	-6.8	-6.86667	0.11547
fda_ligand_1647.pdbqt	ZINC000000896595	ativan	-6.7	-7	-6.9	-6.86667	0.152753
fda_ligand_1655.pdbqt	ZINC000003791297	enalapril	-6.4	-7.1	-7.1	-6.86667	0.404145
fda_ligand_1701.pdbqt	ZINC000003816514	rolapitant	-6.8	-6.9	-6.9	-6.86667	0.057735
fda_ligand_1759.pdbqt	ZINC000003938482	noxafil	-6.2	-7.2	-7.2	-6.86667	0.57735
fda_ligand_2040.pdbqt	ZINC000033965961	ZINC33965961	-6.9	-6.8	-6.9	-6.86667	0.057735
fda_ligand_2060.pdbqt	ZINC000003812988	butorfanol	-6.7	-7	-6.9	-6.86667	0.152753
fda_ligand_2070.pdbqt	ZINC000003812306	moexipril	-6.8	-7	-6.8	-6.86667	0.11547
fda_ligand_2093.pdbqt	ZINC000150338699	visudyne	-6.9	-6.8	-6.9	-6.86667	0.057735
fda_ligand_0683.pdbqt	ZINC000001530935	rabeprazole	-6.8	-7.1	-6.7	-6.86667	0.208167
fda_ligand_0057.pdbqt	ZINC000002599970	formoterol	-6.7	-6.8	-7	-6.83333	0.152753
fda_ligand_0134.pdbqt	ZINC000004097383	pancuronium	-6.7	-7	-6.8	-6.83333	0.152753
fda_ligand_0138.pdbqt	ZINC000012503291	spiriva	-6.8	-6.8	-6.9	-6.83333	0.057735
fda_ligand_0155.pdbqt	ZINC000002005550	secobarbital	-6.8	-6.8	-6.9	-6.83333	0.057735
fda_ligand_0296.pdbqt	ZINC000000004840	arava	-6.8	-6.9	-6.8	-6.83333	0.057735
fda_ligand_0307.pdbqt	ZINC000019796087	nicardipine	-6.6	-6.9	-7	-6.83333	0.208167
fda_ligand_0314.pdbqt	ZINC000000003876	ambien	-6.7	-6.9	-6.9	-6.83333	0.11547
fda_ligand_0371.pdbqt	ZINC000000020220	ciprofloxacin	-6.5	-7.3	-6.7	-6.83333	0.416333
fda_ligand_0509.pdbqt	ZINC000003929022	tenofovir disoproxil	-6.9	-7	-6.6	-6.83333	0.208167
fda_ligand_0635.pdbqt	ZINC000022002218	molindone	-6.7	-6.9	-6.9	-6.83333	0.11547
fda_ligand_0764.pdbqt	ZINC000019361042	meclizine	-6.7	-7	-6.8	-6.83333	0.152753
fda_ligand_0772.pdbqt	ZINC000019419017	magnevist	-6.6	-6.9	-7	-6.83333	0.208167
fda_ligand_0789.pdbqt	ZINC000001530713	valacyclovir	-6.9	-6.9	-6.7	-6.83333	0.11547
fda_ligand_1093.pdbqt	ZINC000003873371	sulconazole	-6.7	-6.8	-7	-6.83333	0.152753
fda_ligand_1234.pdbqt	ZINC000004632106	medetomidine	-6.8	-6.8	-6.9	-6.83333	0.057735
fda_ligand_1310.pdbqt	ZINC000003830716	diphenoxylate	-6.8	-6.8	-6.9	-6.83333	0.057735
fda_ligand_1367.pdbqt	ZINC000034220093	flutemetamol	-6.7	-6.9	-6.9	-6.83333	0.11547
fda_ligand_1487.pdbqt	ZINC000000000471	skelaxin	-6.7	-7	-6.8	-6.83333	0.152753
fda_ligand_1571.pdbqt	ZINC000008552123	tbz	-6.7	-6.9	-6.9	-6.83333	0.11547
fda_ligand_1645.pdbqt	ZINC000003812984	levorphanol	-6.5	-7.1	-6.9	-6.83333	0.305505
fda_ligand_1649.pdbqt	ZINC000000968264	cyproheptadine	-7	-6.8	-6.7	-6.83333	0.152753
fda_ligand_1751.pdbqt	ZINC000000968327	pioglitazone	-6.7	-6.8	-7	-6.83333	0.152753
fda_ligand_1752.pdbqt	ZINC000000968327	pioglitazone	-6.7	-6.7	-7.1	-6.83333	0.23094
fda_ligand_1795.pdbqt	ZINC000001319780	butrans	-6.6	-7.1	-6.8	-6.83333	0.251661
fda_ligand_1796.pdbqt	ZINC000001319780	butrans	-6.7	-7	-6.8	-6.83333	0.152753
fda_ligand_1898.pdbqt	ZINC000003982483	lincomycin	-6.9	-6.9	-6.7	-6.83333	0.11547
fda_ligand_2041.pdbqt	ZINC000033965961	ZINC33965961	-6.7	-6.8	-7	-6.83333	0.152753
fda_ligand_2054.pdbqt	ZINC000001850374	nix	-7	-6.5	-7	-6.83333	0.288675
fda_ligand_2061.pdbqt	ZINC000003812988	butorfanol	-6.6	-7	-6.9	-6.83333	0.208167
fda_ligand_2113.pdbqt	ZINC000022448097	eovist	-6.7	-6.8	-7	-6.83333	0.152753
fda_ligand_0075.pdbqt	ZINC000053084692	safinamide	-6.7	-6.9	-6.8	-6.8	0.1
fda_ligand_1327.pdbqt	ZINC000095616600	terazosin	-6.7	-6.9	-6.8	-6.8	0.1
fda_ligand_1985.pdbqt	ZINC000003916214	neratinib	-6.7	-6.9	-6.8	-6.8	0.1
fda_ligand_0008.pdbqt	ZINC000003607120	zymar	-6.6	-7	-6.8	-6.8	0.2
fda_ligand_0081.pdbqt	ZINC000000002299	ZINC2299	-6.4	-7.1	-6.9	-6.8	0.360555
fda_ligand_0089.pdbqt	ZINC000013587680	iloprost	-6.8	-6.8	-6.8	-6.8	0
fda_ligand_0102.pdbqt	ZINC000012360535	hydralazine	-6.8	-6.7	-6.9	-6.8	0.1
fda_ligand_0107.pdbqt	ZINC000003806063	rapaflo	-6.6	-7.1	-6.7	-6.8	0.264575
fda_ligand_0110.pdbqt	ZINC000009212654	retin-a	-7	-6.7	-6.7	-6.8	0.173205
fda_ligand_0666.pdbqt	ZINC000019364222	hydroxyzine	-6.7	-6.8	-6.9	-6.8	0.1
fda_ligand_0722.pdbqt	ZINC000014263142	artemether	-6.8	-6.7	-6.9	-6.8	0.1
fda_ligand_0763.pdbqt	ZINC000019361042	meclizine	-6.7	-7	-6.7	-6.8	0.173205
fda_ligand_0816.pdbqt	ZINC000000006427	diazepam	-6.6	-6.8	-7	-6.8	0.2
fda_ligand_0846.pdbqt	ZINC000000537752	flurazepam	-6.6	-6.9	-6.9	-6.8	0.173205
fda_ligand_0847.pdbqt	ZINC000000537752	flurazepam	-6.6	-6.9	-6.9	-6.8	0.173205
fda_ligand_0853.pdbqt	ZINC000000537957	mebrofenin	-6.5	-7.3	-6.6	-6.8	0.43589
fda_ligand_1006.pdbqt	ZINC000000402909	fenoprofen	-6.4	-7	-7	-6.8	0.34641
fda_ligand_1034.pdbqt	ZINC000000001735	minoxidil	-6.8	-6.6	-7	-6.8	0.2
fda_ligand_1060.pdbqt	ZINC000003812897	primogyn	-6.7	-6.8	-6.9	-6.8	0.1
fda_ligand_1094.pdbqt	ZINC000003873371	sulconazole	-6.7	-6.7	-7	-6.8	0.173205
fda_ligand_1290.pdbqt	ZINC000095616599	terazosin	-6.6	-7	-6.8	-6.8	0.2
fda_ligand_1425.pdbqt	ZINC000000020255	amd	-6.7	-6.7	-7	-6.8	0.173205
fda_ligand_1521.pdbqt	ZINC000000000431	ativan	-6.7	-7	-6.7	-6.8	0.173205
fda_ligand_1550.pdbqt	ZINC000035653009	prasugrel	-6.9	-6.6	-6.9	-6.8	0.173205
fda_ligand_1623.pdbqt	ZINC000011680067	ZINC11680067	-6.6	-7	-6.8	-6.8	0.2
fda_ligand_1648.pdbqt	ZINC000000968264	cyproheptadine	-6.8	-6.7	-6.9	-6.8	0.1
fda_ligand_1681.pdbqt	ZINC000000403079	midodrine	-6.8	-6.7	-6.9	-6.8	0.1
fda_ligand_1788.pdbqt	ZINC000001843099	alfuzosin	-6.7	-6.7	-7	-6.8	0.173205
fda_ligand_2055.pdbqt	ZINC000003201907	dxm	-6.5	-6.8	-7.1	-6.8	0.3
fda_ligand_2075.pdbqt	ZINC000003979899	brivaracetam	-6.7	-6.8	-6.9	-6.8	0.1
fda_ligand_0115.pdbqt	ZINC000000968326	pioglitazone	-6.6	-6.4	-7.3	-6.76667	0.472582
fda_ligand_0168.pdbqt	ZINC000003784120	iloprost	-6.7	-6.7	-6.9	-6.76667	0.11547
fda_ligand_0353.pdbqt	ZINC000026664090	sqv	-6.2	-7.7	-6.4	-6.76667	0.814453
fda_ligand_0400.pdbqt	ZINC000022448983	bosulif	-6.6	-6.9	-6.8	-6.76667	0.152753
fda_ligand_0495.pdbqt	ZINC000003873295	oxiconazole	-6.7	-6.9	-6.7	-6.76667	0.11547
fda_ligand_0527.pdbqt	ZINC000100296828	ZINC100296828	-6.6	-6.9	-6.8	-6.76667	0.152753
fda_ligand_0528.pdbqt	ZINC000100296828	ZINC100296828	-6.6	-6.9	-6.8	-6.76667	0.152753
fda_ligand_0584.pdbqt	ZINC000000537805	diabeta	-6.5	-7.3	-6.5	-6.76667	0.46188
fda_ligand_0633.pdbqt	ZINC000022002214	molindone	-6.7	-6.9	-6.7	-6.76667	0.11547
fda_ligand_0672.pdbqt	ZINC000019364229	cetirizine	-6.5	-6.9	-6.9	-6.76667	0.23094
fda_ligand_0704.pdbqt	ZINC000013545634	pentobarbital	-6.5	-6.9	-6.9	-6.76667	0.23094
fda_ligand_0705.pdbqt	ZINC000013545634	pentobarbital	-6.5	-6.9	-6.9	-6.76667	0.23094
fda_ligand_1075.pdbqt	ZINC000000057340	robaxin	-6.6	-6.9	-6.8	-6.76667	0.152753
fda_ligand_1154.pdbqt	ZINC000000000856	formoterol	-6	-7.1	-7.2	-6.76667	0.665833
fda_ligand_1173.pdbqt	ZINC000000968330	rosiglitazone	-6.8	-6.8	-6.7	-6.76667	0.057735
fda_ligand_1239.pdbqt	ZINC000003990451	selexipag	-6.6	-7	-6.7	-6.76667	0.208167
fda_ligand_1362.pdbqt	ZINC000000001148	doxepin	-6.5	-6.9	-6.9	-6.76667	0.23094
fda_ligand_1430.pdbqt	ZINC000000897385	vagistat-1	-6.5	-7	-6.8	-6.76667	0.251661
fda_ligand_1433.pdbqt	ZINC000001850377	nix	-6.7	-6.9	-6.7	-6.76667	0.11547
fda_ligand_1491.pdbqt	ZINC000000000416	labetalol	-6.6	-6.5	-7.2	-6.76667	0.378594
fda_ligand_1518.pdbqt	ZINC000000120319	sda	-6.6	-7	-6.7	-6.76667	0.208167
fda_ligand_1549.pdbqt	ZINC000035653007	prasugrel	-6.4	-6.7	-7.2	-6.76667	0.404145
fda_ligand_1622.pdbqt	ZINC000004097416	ZINC4097416	-6.6	-6.9	-6.8	-6.76667	0.152753
fda_ligand_1661.pdbqt	ZINC000000896968	cuvposa	-6.7	-6.8	-6.8	-6.76667	0.057735
fda_ligand_1738.pdbqt	ZINC000003842753	viroptic	-6.7	-6.7	-6.9	-6.76667	0.11547
fda_ligand_1812.pdbqt	ZINC000084758479	brexpiprazole	-7	-6.6	-6.7	-6.76667	0.208167
fda_ligand_1926.pdbqt	ZINC000000968301	cuvposa	-6.8	-6.8	-6.7	-6.76667	0.057735
fda_ligand_2025.pdbqt	ZINC000011677376	saphris	-6.7	-6.8	-6.8	-6.76667	0.057735
fda_ligand_2032.pdbqt	ZINC000021982937	multihance	-6.6	-6.7	-7	-6.76667	0.208167
fda_ligand_2084.pdbqt	ZINC000100016058	tipranavir	-7.1	-6.4	-6.8	-6.76667	0.351188
fda_ligand_2089.pdbqt	ZINC000306122005	ZINC306122005	-6.9	-6.5	-6.9	-6.76667	0.23094
fda_ligand_0492.pdbqt	ZINC000003818808	tofacitinib	-6.8	-6.9	-6.6	-6.76667	0.152753
fda_ligand_0573.pdbqt	ZINC000003941829	fosamprenavir	-6.8	-6.9	-6.6	-6.76667	0.152753
fda_ligand_1107.pdbqt	ZINC000003814395	ZINC3814395	-6.6	-6.8	-6.9	-6.76667	0.152753
fda_ligand_1158.pdbqt	ZINC000000039089	epinephrine	-6.9	-6.8	-6.6	-6.76667	0.152753
fda_ligand_1309.pdbqt	ZINC000003830716	diphenoxylate	-6.6	-6.8	-6.9	-6.76667	0.152753
fda_ligand_1572.pdbqt	ZINC000008552123	tbz	-6.6	-6.8	-6.9	-6.76667	0.152753
fda_ligand_1633.pdbqt	ZINC000001530701	meprobamate	-6.6	-6.8	-6.9	-6.76667	0.152753
fda_ligand_1775.pdbqt	ZINC000000403011	labetalol	-6.1	-7.1	-7.1	-6.76667	0.57735
fda_ligand_1918.pdbqt	ZINC000085432544	vinblastine	-6.6	-6.8	-6.9	-6.76667	0.152753
fda_ligand_1963.pdbqt	ZINC000100005670	pamabrom	-6.8	-6.6	-6.9	-6.76667	0.152753
fda_ligand_1986.pdbqt	ZINC000003916214	neratinib	-6.8	-6.9	-6.6	-6.76667	0.152753
fda_ligand_0195.pdbqt	ZINC000003800008	dostinex	-6.7	-6.6	-6.9	-6.73333	0.152753
fda_ligand_0671.pdbqt	ZINC000019364229	cetirizine	-6.3	-7	-6.9	-6.73333	0.378594
fda_ligand_1015.pdbqt	ZINC000000057512	tolazamide	-6.6	-6.7	-6.9	-6.73333	0.152753
fda_ligand_1257.pdbqt	ZINC000000156395	acetyl tyrosine	-6.6	-6.7	-6.9	-6.73333	0.152753
fda_ligand_1833.pdbqt	ZINC000043202140	opsumit	-6.9	-6.4	-6.9	-6.73333	0.288675
fda_ligand_2026.pdbqt	ZINC000011681534	nebivolol	-7.1	-6.7	-6.4	-6.73333	0.351188
fda_ligand_0050.pdbqt	ZINC000000602128	bepotastine	-6.7	-6.8	-6.7	-6.73333	0.057735
fda_ligand_0056.pdbqt	ZINC000002570817	bromfenac	-6.5	-7	-6.7	-6.73333	0.251661
fda_ligand_0170.pdbqt	ZINC000016159083	pimavanserin	-6.8	-6.8	-6.6	-6.73333	0.11547
fda_ligand_0171.pdbqt	ZINC000016159083	pimavanserin	-6.8	-6.8	-6.6	-6.73333	0.11547
fda_ligand_0231.pdbqt	ZINC000003874950	secobarbital	-6.7	-6.7	-6.8	-6.73333	0.057735
fda_ligand_0324.pdbqt	ZINC000004693575	omeprazole	-6.8	-6.7	-6.7	-6.73333	0.057735
fda_ligand_0402.pdbqt	ZINC000022448983	bosulif	-6.6	-6.9	-6.7	-6.73333	0.152753
fda_ligand_0530.pdbqt	ZINC000100296832	ZINC100296832	-6.6	-6.8	-6.8	-6.73333	0.11547
fda_ligand_0632.pdbqt	ZINC000022002214	molindone	-6.7	-6.8	-6.7	-6.73333	0.057735
fda_ligand_0691.pdbqt	ZINC000001530974	butoconazole	-6.7	-6.7	-6.8	-6.73333	0.057735
fda_ligand_0696.pdbqt	ZINC000001530703	tolbutamide	-6.8	-6.8	-6.6	-6.73333	0.11547
fda_ligand_0771.pdbqt	ZINC000019419017	magnevist	-6.5	-7.1	-6.6	-6.73333	0.321455
fda_ligand_0944.pdbqt	ZINC000002032615	nix	-6.9	-7	-6.3	-6.73333	0.378594
fda_ligand_1002.pdbqt	ZINC000003981610	rapivab	-6.7	-6.8	-6.7	-6.73333	0.057735
fda_ligand_1021.pdbqt	ZINC000038197764	zymar	-6.5	-6.9	-6.8	-6.73333	0.208167
fda_ligand_1109.pdbqt	ZINC000003831282	bicillin v2	-6.7	-6.8	-6.7	-6.73333	0.057735
fda_ligand_1112.pdbqt	ZINC000008214692	tobramycin	-6.8	-6.6	-6.8	-6.73333	0.11547
fda_ligand_1128.pdbqt	ZINC000005456939	retin-a	-6.7	-6.7	-6.8	-6.73333	0.057735
fda_ligand_1204.pdbqt	ZINC000049841054	kyprolis	-6.8	-6.6	-6.8	-6.73333	0.11547
fda_ligand_1221.pdbqt	ZINC000000000456	mepivacaine	-6.7	-6.7	-6.8	-6.73333	0.057735
fda_ligand_1275.pdbqt	ZINC000000057313	lodine	-6.7	-6.7	-6.8	-6.73333	0.057735
fda_ligand_1390.pdbqt	ZINC000003830713	pge2	-6.7	-6.7	-6.8	-6.73333	0.057735
fda_ligand_1419.pdbqt	ZINC000000001016	benzoyl	-6.8	-6.7	-6.7	-6.73333	0.057735
fda_ligand_1423.pdbqt	ZINC000003943279	pradaxa	-6.7	-7	-6.5	-6.73333	0.251661
fda_ligand_1547.pdbqt	ZINC000000020241	mefenamic	-6.7	-6.7	-6.8	-6.73333	0.057735
fda_ligand_1768.pdbqt	ZINC000000057341	robaxin	-6.6	-6.9	-6.7	-6.73333	0.152753
fda_ligand_1787.pdbqt	ZINC000001843099	alfuzosin	-7	-6.4	-6.8	-6.73333	0.305505
fda_ligand_1798.pdbqt	ZINC000085555528	ZINC85555528	-6.8	-6.7	-6.7	-6.73333	0.057735
fda_ligand_1813.pdbqt	ZINC000084758479	brexpiprazole	-6.6	-6.5	-7.1	-6.73333	0.321455
fda_ligand_1930.pdbqt	ZINC000043195697	valbenazine	-6.9	-6.3	-7	-6.73333	0.378594
fda_ligand_2042.pdbqt	ZINC000033965961	ZINC33965961	-6.7	-6.8	-6.7	-6.73333	0.057735
fda_ligand_2115.pdbqt	ZINC000022448097	eovist	-6.3	-6.9	-7	-6.73333	0.378594
fda_ligand_0036.pdbqt	ZINC000085205448	ZINC85205448	-6.7	-6.7	-6.7	-6.7	0
fda_ligand_0105.pdbqt	ZINC000003813010	fluorodeoxyuridine	-6.6	-6.9	-6.6	-6.7	0.173205
fda_ligand_0141.pdbqt	ZINC000001542392	alfuzosin	-6.7	-6.6	-6.8	-6.7	0.1
fda_ligand_0164.pdbqt	ZINC000000538509	trimethobenzamide	-6.6	-6.7	-6.8	-6.7	0.1
fda_ligand_0209.pdbqt	ZINC000003824921	fexofenadine	-6.5	-6.7	-6.9	-6.7	0.2
fda_ligand_0302.pdbqt	ZINC000000602632	intelence	-6.5	-6.8	-6.8	-6.7	0.173205
fda_ligand_0401.pdbqt	ZINC000022448983	bosulif	-6.7	-6.6	-6.8	-6.7	0.1
fda_ligand_0487.pdbqt	ZINC000000001317	disofenin	-6.9	-6.3	-6.9	-6.7	0.34641
fda_ligand_0574.pdbqt	ZINC000003941829	fosamprenavir	-6.2	-7.1	-6.8	-6.7	0.458258
fda_ligand_0878.pdbqt	ZINC000004655029	bedaquiline	-6.4	-6.9	-6.8	-6.7	0.264575
fda_ligand_0908.pdbqt	ZINC000085537014	cobicistat	-6.5	-6.9	-6.7	-6.7	0.2
fda_ligand_0937.pdbqt	ZINC000002019954	articaine	-6.7	-6.7	-6.7	-6.7	0
fda_ligand_0983.pdbqt	ZINC000001996784	myrbetriq	-6.4	-6.9	-6.8	-6.7	0.264575
fda_ligand_1097.pdbqt	ZINC000006627681	trimethoprim	-6.6	-6.7	-6.8	-6.7	0.1
fda_ligand_1175.pdbqt	ZINC000000402830	clemastine	-6.5	-6.8	-6.8	-6.7	0.173205
fda_ligand_1244.pdbqt	ZINC000100009280	hyoscyamine	-6.3	-6.9	-6.9	-6.7	0.34641
fda_ligand_1358.pdbqt	ZINC000000896958	cuvposa	-6.7	-6.8	-6.6	-6.7	0.1
fda_ligand_1443.pdbqt	ZINC000000000941	arimidex	-6.6	-6.9	-6.6	-6.7	0.173205
fda_ligand_1476.pdbqt	ZINC000000083315	tryptophan	-6.6	-6.7	-6.8	-6.7	0.1
fda_ligand_1514.pdbqt	ZINC000000597013	donepezil	-6.5	-6.7	-6.9	-6.7	0.2
fda_ligand_1663.pdbqt	ZINC000004095696	cilastatin	-6.7	-6.5	-6.9	-6.7	0.2
fda_ligand_1714.pdbqt	ZINC000003810860	zetia	-6.5	-6.8	-6.8	-6.7	0.173205
fda_ligand_1789.pdbqt	ZINC000001851149	abilify	-6.8	-6.2	-7.1	-6.7	0.458258
fda_ligand_1800.pdbqt	ZINC000085555528	ZINC85555528	-6.7	-6.7	-6.7	-6.7	0
fda_ligand_2010.pdbqt	ZINC000000004893	asenapine	-6.6	-6.7	-6.8	-6.7	0.1
fda_ligand_2043.pdbqt	ZINC000033965961	ZINC33965961	-6.7	-7	-6.4	-6.7	0.3
fda_ligand_0634.pdbqt	ZINC000022002218	molindone	-6.6	-6.8	-6.7	-6.7	0.1
fda_ligand_1011.pdbqt	ZINC000003831531	tiagabine	-6.6	-6.8	-6.7	-6.7	0.1
fda_ligand_1416.pdbqt	ZINC000000000751	tbz	-6.6	-6.8	-6.7	-6.7	0.1
fda_ligand_0047.pdbqt	ZINC000000005895	rizatriptan	-6.6	-6.9	-6.5	-6.66667	0.208167
fda_ligand_0133.pdbqt	ZINC000003815424	mestranol	-6.6	-6.7	-6.7	-6.66667	0.057735
fda_ligand_0163.pdbqt	ZINC000000538509	trimethobenzamide	-6.6	-6.7	-6.7	-6.66667	0.057735
fda_ligand_0217.pdbqt	ZINC000003872566	fexofenadine	-6.7	-6.8	-6.5	-6.66667	0.152753
fda_ligand_0230.pdbqt	ZINC000003874950	secobarbital	-6.4	-6.8	-6.8	-6.66667	0.23094
fda_ligand_0332.pdbqt	ZINC000000968310	esmirtazapine	-6.5	-6.8	-6.7	-6.66667	0.152753
fda_ligand_0439.pdbqt	ZINC000000537822	haloperidol	-6.6	-7.1	-6.3	-6.66667	0.404145
fda_ligand_0665.pdbqt	ZINC000019364222	hydroxyzine	-6.4	-6.8	-6.8	-6.66667	0.23094
fda_ligand_0692.pdbqt	ZINC000001530697	thioridazine	-6.7	-6.7	-6.6	-6.66667	0.057735
fda_ligand_0694.pdbqt	ZINC000001530697	thioridazine	-6.7	-6.7	-6.6	-6.66667	0.057735
fda_ligand_0706.pdbqt	ZINC000000000353	tussin	-6.5	-6.8	-6.7	-6.66667	0.152753
fda_ligand_0818.pdbqt	ZINC000000007673	vimpat	-6.5	-6.8	-6.7	-6.66667	0.152753
fda_ligand_0907.pdbqt	ZINC000085537014	cobicistat	-6.9	-6.9	-6.2	-6.66667	0.404145
fda_ligand_0909.pdbqt	ZINC000000607790	colcrys	-6.8	-6.5	-6.7	-6.66667	0.152753
fda_ligand_0941.pdbqt	ZINC000004097404	vecuronium	-6.6	-6.7	-6.7	-6.66667	0.057735
fda_ligand_1017.pdbqt	ZINC000000057512	tolazamide	-6.6	-6.2	-7.2	-6.66667	0.503322
fda_ligand_1053.pdbqt	ZINC000000056653	isoproterenol	-6.7	-6.6	-6.7	-6.66667	0.057735
fda_ligand_1218.pdbqt	ZINC000004693574	omeprazole	-6.7	-6.7	-6.6	-6.66667	0.057735
fda_ligand_1368.pdbqt	ZINC000000538483	trazodone	-6.6	-6.8	-6.6	-6.66667	0.11547
fda_ligand_1394.pdbqt	ZINC000001530283	carbaglu	-6.7	-6.6	-6.7	-6.66667	0.057735
fda_ligand_1446.pdbqt	ZINC000000001655	meclofenamate	-6.9	-6.6	-6.5	-6.66667	0.208167
fda_ligand_1513.pdbqt	ZINC000000597013	donepezil	-6.4	-6.7	-6.9	-6.66667	0.251661
fda_ligand_1519.pdbqt	ZINC000000120319	sda	-6.8	-6.5	-6.7	-6.66667	0.152753
fda_ligand_1707.pdbqt	ZINC000072267023	eliglustat	-6.7	-6.9	-6.4	-6.66667	0.251661
fda_ligand_1727.pdbqt	ZINC000000004351	alaway	-6.6	-6.8	-6.6	-6.66667	0.11547
fda_ligand_1728.pdbqt	ZINC000000004351	alaway	-6.6	-6.8	-6.6	-6.66667	0.11547
fda_ligand_1746.pdbqt	ZINC000003805768	ivabradine	-6.6	-6.7	-6.7	-6.66667	0.057735
fda_ligand_1764.pdbqt	ZINC000003964325	sunitinib	-6.8	-6.6	-6.6	-6.66667	0.11547
fda_ligand_1968.pdbqt	ZINC000001698306	ZINC1698306	-6.6	-6.7	-6.7	-6.66667	0.057735
fda_ligand_1976.pdbqt	ZINC000101489663	ZINC101489663	-6.6	-6.6	-6.8	-6.66667	0.11547
fda_ligand_2024.pdbqt	ZINC000011677376	saphris	-6.7	-6.6	-6.7	-6.66667	0.057735
fda_ligand_0579.pdbqt	ZINC000000538386	sufentanil	-6.4	-6.7	-6.8	-6.63333	0.208167
fda_ligand_0670.pdbqt	ZINC000019364229	cetirizine	-6.4	-6.7	-6.8	-6.63333	0.208167
fda_ligand_0117.pdbqt	ZINC000000968345	butabarbital	-6.5	-6.7	-6.7	-6.63333	0.11547
fda_ligand_0118.pdbqt	ZINC000000968345	butabarbital	-6.5	-6.7	-6.7	-6.63333	0.11547
fda_ligand_0167.pdbqt	ZINC000242437513	ZINC242437513	-6	-7	-6.9	-6.63333	0.550757
fda_ligand_0179.pdbqt	ZINC000003794601	citalopram	-6.7	-6.6	-6.6	-6.63333	0.057735
fda_ligand_0212.pdbqt	ZINC000000002041	ropinirole	-6.5	-6.6	-6.8	-6.63333	0.152753
fda_ligand_0285.pdbqt	ZINC000018043251	theophylline	-6.7	-6.5	-6.7	-6.63333	0.11547
fda_ligand_0295.pdbqt	ZINC000000020231	apraclonidine	-6.3	-7	-6.6	-6.63333	0.351188
fda_ligand_0333.pdbqt	ZINC000000968310	esmirtazapine	-6.6	-6.6	-6.7	-6.63333	0.057735
fda_ligand_0334.pdbqt	ZINC000000968310	esmirtazapine	-6.4	-6.8	-6.7	-6.63333	0.208167
fda_ligand_0347.pdbqt	ZINC000022065398	ZINC22065398	-6.5	-6.6	-6.8	-6.63333	0.152753
fda_ligand_0438.pdbqt	ZINC000000537822	haloperidol	-6.5	-7.1	-6.3	-6.63333	0.416333
fda_ligand_0529.pdbqt	ZINC000100296832	ZINC100296832	-6.5	-6.6	-6.8	-6.63333	0.152753
fda_ligand_0604.pdbqt	ZINC000003813078	epoprostenol	-7.1	-6.8	-6	-6.63333	0.568624
fda_ligand_0650.pdbqt	ZINC000003952881	balsalazide	-6.6	-6.9	-6.4	-6.63333	0.251661
fda_ligand_0743.pdbqt	ZINC000019796018	prochlorperazine	-6.5	-6.8	-6.6	-6.63333	0.152753
fda_ligand_0745.pdbqt	ZINC000019796018	prochlorperazine	-6.6	-6.7	-6.6	-6.63333	0.057735
fda_ligand_0794.pdbqt	ZINC000001481833	varenicline	-6.4	-6.8	-6.7	-6.63333	0.208167
fda_ligand_0951.pdbqt	ZINC000004213946	nebivolol	-7	-6.7	-6.2	-6.63333	0.404145
fda_ligand_0958.pdbqt	ZINC000004097426	glyset	-6.6	-6.7	-6.6	-6.63333	0.057735
fda_ligand_0960.pdbqt	ZINC000004097426	glyset	-6.6	-6.7	-6.6	-6.63333	0.057735
fda_ligand_1020.pdbqt	ZINC000038197764	zymar	-6.5	-6.8	-6.6	-6.63333	0.152753
fda_ligand_1174.pdbqt	ZINC000000968330	rosiglitazone	-6.8	-6.7	-6.4	-6.63333	0.208167
fda_ligand_1182.pdbqt	ZINC000000394284	tussin	-6.6	-6.6	-6.7	-6.63333	0.057735
fda_ligand_1307.pdbqt	ZINC000095619101	ranolazine	-6.3	-6.9	-6.7	-6.63333	0.305505
fda_ligand_1341.pdbqt	ZINC000030691727	aclidinium	-6.5	-6.7	-6.7	-6.63333	0.11547
fda_ligand_1369.pdbqt	ZINC000000538483	trazodone	-6.5	-6.8	-6.6	-6.63333	0.152753
fda_ligand_1447.pdbqt	ZINC000000119344	aminohippurate	-6.3	-6.7	-6.9	-6.63333	0.305505
fda_ligand_1637.pdbqt	ZINC000001530951	soma	-6.6	-6.6	-6.7	-6.63333	0.057735
fda_ligand_1693.pdbqt	ZINC000003651680	butabarbital	-6.5	-6.7	-6.7	-6.63333	0.11547
fda_ligand_1694.pdbqt	ZINC000003651680	butabarbital	-6.5	-6.7	-6.7	-6.63333	0.11547
fda_ligand_1928.pdbqt	ZINC000043195697	valbenazine	-6.9	-6.4	-6.6	-6.63333	0.251661
fda_ligand_2011.pdbqt	ZINC000000004893	asenapine	-6.5	-6.7	-6.7	-6.63333	0.11547
fda_ligand_2114.pdbqt	ZINC000022448097	eovist	-6.4	-6.9	-6.6	-6.63333	0.251661
fda_ligand_0101.pdbqt	ZINC000012360535	hydralazine	-6.6	-6.7	-6.5	-6.6	0.1
fda_ligand_0149.pdbqt	ZINC000000004778	nev	-6.5	-6.6	-6.7	-6.6	0.1
fda_ligand_0156.pdbqt	ZINC000002005550	secobarbital	-6.5	-6.6	-6.7	-6.6	0.1
fda_ligand_0174.pdbqt	ZINC000022851765	eovist	-6.4	-6.7	-6.7	-6.6	0.173205
fda_ligand_0361.pdbqt	ZINC000242437514	ZINC242437514	-6.2	-7.1	-6.5	-6.6	0.458258
fda_ligand_0410.pdbqt	ZINC000003794711	zavesca	-6.4	-6.7	-6.7	-6.6	0.173205
fda_ligand_0466.pdbqt	ZINC000000006156	modafinil	-6.4	-7.1	-6.3	-6.6	0.43589
fda_ligand_0490.pdbqt	ZINC000001999441	ZINC1999441	-6.8	-7	-6	-6.6	0.52915
fda_ligand_0651.pdbqt	ZINC000003955219	darunavir	-6.9	-6.5	-6.4	-6.6	0.264575
fda_ligand_0654.pdbqt	ZINC000003977764	fosinopril	-6.7	-6.6	-6.5	-6.6	0.1
fda_ligand_0894.pdbqt	ZINC000001530950	soma	-6.4	-6.7	-6.7	-6.6	0.173205
fda_ligand_1101.pdbqt	ZINC000000057147	ZINC57147	-6.4	-6.4	-7	-6.6	0.34641
fda_ligand_1224.pdbqt	ZINC000034051848	vortioxetine	-6.1	-7.2	-6.5	-6.6	0.556776
fda_ligand_1413.pdbqt	ZINC000000001644	mafenide	-6.4	-6.7	-6.7	-6.6	0.173205
fda_ligand_1452.pdbqt	ZINC000000538283	remifentanil	-6.7	-6.8	-6.3	-6.6	0.264575
fda_ligand_1453.pdbqt	ZINC000000538283	remifentanil	-6.6	-6.5	-6.7	-6.6	0.1
fda_ligand_1553.pdbqt	ZINC000000000509	mirtazapine	-6.5	-6.6	-6.7	-6.6	0.1
fda_ligand_1554.pdbqt	ZINC000000000509	mirtazapine	-6.5	-6.6	-6.7	-6.6	0.1
fda_ligand_1555.pdbqt	ZINC000000000509	mirtazapine	-6.4	-6.6	-6.8	-6.6	0.2
fda_ligand_1896.pdbqt	ZINC000003982483	lincomycin	-6.5	-6.9	-6.4	-6.6	0.264575
fda_ligand_1919.pdbqt	ZINC000085432544	vinblastine	-6.5	-6.9	-6.4	-6.6	0.264575
fda_ligand_1966.pdbqt	ZINC000001690324	sulisobenzone	-6.3	-7	-6.5	-6.6	0.360555
fda_ligand_1967.pdbqt	ZINC000001690324	sulisobenzone	-6.3	-7	-6.5	-6.6	0.360555
fda_ligand_0123.pdbqt	ZINC000021297660	cellcept	-6.8	-6.6	-6.4	-6.6	0.2
fda_ligand_0319.pdbqt	ZINC000000004319	dilevalol	-6.5	-7.2	-6.1	-6.6	0.556776
fda_ligand_0512.pdbqt	ZINC000008214703	unoprostone	-6.6	-6.6	-6.6	-6.6	0
fda_ligand_0744.pdbqt	ZINC000019796018	prochlorperazine	-6.5	-6.7	-6.6	-6.6	0.1
fda_ligand_0903.pdbqt	ZINC000002019953	articaine	-6.6	-6.6	-6.6	-6.6	0
fda_ligand_1526.pdbqt	ZINC000001554274	rilpivirine	-6.6	-6.6	-6.6	-6.6	0
fda_ligand_1578.pdbqt	ZINC000019166988	procarbazin	-6.5	-6.7	-6.6	-6.6	0.1
fda_ligand_1740.pdbqt	ZINC000003871541	anagrelide	-6.9	-6.3	-6.6	-6.6	0.3
fda_ligand_1897.pdbqt	ZINC000003982483	lincomycin	-6.6	-6.6	-6.6	-6.6	0
fda_ligand_1971.pdbqt	ZINC000002008310	ZINC2008310	-6.5	-6.7	-6.6	-6.6	0.1
fda_ligand_2016.pdbqt	ZINC000000897258	formoterol	-6.1	-6.6	-7.1	-6.6	0.5
fda_ligand_2023.pdbqt	ZINC000011677376	saphris	-6.6	-6.6	-6.6	-6.6	0
fda_ligand_0116.pdbqt	ZINC000000968326	pioglitazone	-6.6	-6.7	-6.4	-6.56667	0.152753
fda_ligand_0346.pdbqt	ZINC000013512456	teriflunomide	-6.4	-6.7	-6.6	-6.56667	0.152753
fda_ligand_0437.pdbqt	ZINC000000119717	naphazoline	-6.9	-6.9	-5.9	-6.56667	0.57735
fda_ligand_1104.pdbqt	ZINC000001530776	eht0201	-6.3	-7	-6.4	-6.56667	0.378594
fda_ligand_1720.pdbqt	ZINC000003812841	mevacor	-6.6	-6.7	-6.4	-6.56667	0.152753
fda_ligand_1921.pdbqt	ZINC000096903163	ZINC96903163	-6.4	-6.9	-6.4	-6.56667	0.288675
fda_ligand_1949.pdbqt	ZINC000000001984	fenofibric acid	-6.4	-6.7	-6.6	-6.56667	0.152753
fda_ligand_0162.pdbqt	ZINC000003812944	flutamide	-6.4	-6.8	-6.5	-6.56667	0.208167
fda_ligand_0313.pdbqt	ZINC000012414057	methylene blue	-6.6	-6.4	-6.7	-6.56667	0.152753
fda_ligand_0335.pdbqt	ZINC000242437511	ZINC242437511	-6.8	-5.8	-7.1	-6.56667	0.680686
fda_ligand_0408.pdbqt	ZINC000003794711	zavesca	-6.3	-6.7	-6.7	-6.56667	0.23094
fda_ligand_0443.pdbqt	ZINC000000005423	febuxostat	-6.6	-6.5	-6.6	-6.56667	0.057735
fda_ligand_0603.pdbqt	ZINC000003792789	isotretinoin	-6.6	-6.6	-6.5	-6.56667	0.057735
fda_ligand_1084.pdbqt	ZINC000000897002	ropivacaine	-6.5	-6.6	-6.6	-6.56667	0.057735
fda_ligand_1354.pdbqt	ZINC000000896569	hydrochlorothiazide	-6.5	-6.7	-6.5	-6.56667	0.11547
fda_ligand_1399.pdbqt	ZINC000003872055	chlorothiazide	-6.5	-6.6	-6.6	-6.56667	0.057735
fda_ligand_1410.pdbqt	ZINC000006827695	ZINC6827695	-6.5	-6.5	-6.7	-6.56667	0.11547
fda_ligand_2009.pdbqt	ZINC000000004893	asenapine	-6.4	-6.6	-6.7	-6.56667	0.152753
fda_ligand_0004.pdbqt	ZINC000003807804	mycelex	-6.3	-6.4	-6.9	-6.53333	0.321455
fda_ligand_0005.pdbqt	ZINC000003807804	mycelex	-6.4	-6.3	-6.9	-6.53333	0.321455
fda_ligand_0122.pdbqt	ZINC000021297660	cellcept	-6.2	-7	-6.4	-6.53333	0.416333
fda_ligand_0172.pdbqt	ZINC000022851765	eovist	-6.3	-6.8	-6.5	-6.53333	0.251661
fda_ligand_0206.pdbqt	ZINC000001530981	terbinafine	-6.7	-6	-6.9	-6.53333	0.472582
fda_ligand_0409.pdbqt	ZINC000003794711	zavesca	-6.7	-6.4	-6.5	-6.53333	0.152753
fda_ligand_0508.pdbqt	ZINC000242437512	ZINC242437512	-6.4	-6.5	-6.7	-6.53333	0.152753
fda_ligand_0809.pdbqt	ZINC000001530760	rythmol	-6.5	-6.7	-6.4	-6.53333	0.152753
fda_ligand_0869.pdbqt	ZINC000000601281	alfentanil	-6.5	-6.8	-6.3	-6.53333	0.251661
fda_ligand_0888.pdbqt	ZINC000001530775	pentamidine	-7	-6.2	-6.4	-6.53333	0.416333
fda_ligand_1032.pdbqt	ZINC000005179119	sulfacetamide	-6	-6.9	-6.7	-6.53333	0.472582
fda_ligand_1096.pdbqt	ZINC000006627681	trimethoprim	-6.4	-6.5	-6.7	-6.53333	0.152753
fda_ligand_1219.pdbqt	ZINC000004693574	omeprazole	-6.4	-6.6	-6.6	-6.53333	0.11547
fda_ligand_1223.pdbqt	ZINC000000000456	mepivacaine	-6.5	-6.5	-6.6	-6.53333	0.057735
fda_ligand_1245.pdbqt	ZINC000100009280	hyoscyamine	-6.4	-6.6	-6.6	-6.53333	0.11547
fda_ligand_1306.pdbqt	ZINC000095619101	ranolazine	-6.3	-6.8	-6.5	-6.53333	0.251661
fda_ligand_1411.pdbqt	ZINC000006827695	ZINC6827695	-6.5	-6.5	-6.6	-6.53333	0.057735
fda_ligand_1417.pdbqt	ZINC000000000751	tbz	-6.6	-6.5	-6.5	-6.53333	0.057735
fda_ligand_1460.pdbqt	ZINC000000403010	labetalol	-6	-7.3	-6.3	-6.53333	0.680686
fda_ligand_1484.pdbqt	ZINC000096014710	ZINC96014710	-6.3	-6.8	-6.5	-6.53333	0.251661
fda_ligand_1523.pdbqt	ZINC000001530968	phisohex	-6.4	-6.7	-6.5	-6.53333	0.152753
fda_ligand_1689.pdbqt	ZINC000003786192	sulindac	-6.4	-6.6	-6.6	-6.53333	0.11547
fda_ligand_1784.pdbqt	ZINC000000968255	acebutolol	-6.3	-6.8	-6.5	-6.53333	0.251661
fda_ligand_1876.pdbqt	ZINC000000897244	sulbactam	-6.4	-6.5	-6.7	-6.53333	0.152753
fda_ligand_1931.pdbqt	ZINC000043195697	valbenazine	-6.6	-6.4	-6.6	-6.53333	0.11547
fda_ligand_2015.pdbqt	ZINC000000897256	formoterol	-6.5	-6.6	-6.5	-6.53333	0.057735
fda_ligand_2033.pdbqt	ZINC000021982937	multihance	-6.5	-6.9	-6.2	-6.53333	0.351188
fda_ligand_1524.pdbqt	ZINC000001530968	phisohex	-6.6	-6.3	-6.7	-6.53333	0.208167
fda_ligand_0572.pdbqt	ZINC000003941829	fosamprenavir	-6.1	-6.4	-7	-6.5	0.458258
fda_ligand_0664.pdbqt	ZINC000019364222	hydroxyzine	-6.5	-6.5	-6.5	-6.5	0
fda_ligand_0739.pdbqt	ZINC000019632670	doxapram	-6.1	-6.4	-7	-6.5	0.458258
fda_ligand_0902.pdbqt	ZINC000004097310	ZINC4097310	-6.2	-6.6	-6.7	-6.5	0.264575
fda_ligand_0906.pdbqt	ZINC000000156792	acebutolol	-6.6	-6.2	-6.7	-6.5	0.264575
fda_ligand_0926.pdbqt	ZINC000001530812	bupivacaine	-6.4	-6.6	-6.5	-6.5	0.1
fda_ligand_1157.pdbqt	ZINC000000003642	lodine	-6.4	-6.6	-6.5	-6.5	0.1
fda_ligand_1298.pdbqt	ZINC000100036536	benztropine	-6.4	-6.7	-6.4	-6.5	0.173205
fda_ligand_1299.pdbqt	ZINC000000009689	starlix	-6.6	-6.6	-6.3	-6.5	0.173205
fda_ligand_1439.pdbqt	ZINC000003929508	oseltamivir	-6.4	-6.5	-6.6	-6.5	0.1
fda_ligand_1463.pdbqt	ZINC000003813088	edex	-6.4	-6.7	-6.4	-6.5	0.173205
fda_ligand_1561.pdbqt	ZINC000000001281	diclofenac	-6.4	-6.5	-6.6	-6.5	0.1
fda_ligand_1573.pdbqt	ZINC000008552123	tbz	-6.4	-6.5	-6.6	-6.5	0.1
fda_ligand_1735.pdbqt	ZINC000003872605	fluvoxamine	-6.5	-6.4	-6.6	-6.5	0.1
fda_ligand_1758.pdbqt	ZINC000003930376	pmea	-6.6	-6.7	-6.2	-6.5	0.264575
fda_ligand_1790.pdbqt	ZINC000001851149	abilify	-6.7	-6.5	-6.3	-6.5	0.2
fda_ligand_1799.pdbqt	ZINC000085555528	ZINC85555528	-6.3	-6.5	-6.7	-6.5	0.2
fda_ligand_1814.pdbqt	ZINC000084843283	lorzone	-6.3	-6.5	-6.7	-6.5	0.2
fda_ligand_1873.pdbqt	ZINC000000137884	stavudine	-6.5	-6.5	-6.5	-6.5	0
fda_ligand_0135.pdbqt	ZINC000003960338	rozerem	-6.2	-6.5	-6.7	-6.46667	0.251661
fda_ligand_0151.pdbqt	ZINC000000136138	oxybenzone	-6.4	-6.5	-6.5	-6.46667	0.057735
fda_ligand_0240.pdbqt	ZINC000003830891	glutathione	-6.3	-6.6	-6.5	-6.46667	0.152753
fda_ligand_0278.pdbqt	ZINC000000049153	thiamine	-6.4	-6.5	-6.5	-6.46667	0.057735
fda_ligand_0383.pdbqt	ZINC000019632706	sular	-6.5	-6.4	-6.5	-6.46667	0.057735
fda_ligand_0403.pdbqt	ZINC000000968328	rosiglitazone	-6.4	-6.5	-6.5	-6.46667	0.057735
fda_ligand_0418.pdbqt	ZINC000013648755	saxagliptin	-6.4	-6.5	-6.5	-6.46667	0.057735
fda_ligand_0419.pdbqt	ZINC000013648755	saxagliptin	-6.4	-6.5	-6.5	-6.46667	0.057735
fda_ligand_0440.pdbqt	ZINC000003798763	pravastatin	-6.4	-6.5	-6.5	-6.46667	0.057735
fda_ligand_0441.pdbqt	ZINC000001530611	desipramine	-6.4	-6.3	-6.7	-6.46667	0.208167
fda_ligand_0450.pdbqt	ZINC000000004166	sotalol	-6.2	-6.7	-6.5	-6.46667	0.251661
fda_ligand_0476.pdbqt	ZINC000000000973	avobenzone	-6.4	-6.5	-6.5	-6.46667	0.057735
fda_ligand_0565.pdbqt	ZINC000003875392	tbz	-6.4	-6.5	-6.5	-6.46667	0.057735
fda_ligand_0738.pdbqt	ZINC000019632670	doxapram	-6	-6.4	-7	-6.46667	0.503322
fda_ligand_0810.pdbqt	ZINC000001530912	emedastine	-6.5	-6.5	-6.4	-6.46667	0.057735
fda_ligand_0833.pdbqt	ZINC000003812974	corgard	-6.3	-6.4	-6.7	-6.46667	0.208167
fda_ligand_0911.pdbqt	ZINC000002522669	fentanyl	-6.1	-6.7	-6.6	-6.46667	0.321455
fda_ligand_1026.pdbqt	ZINC000000000053	aspirin	-6.5	-6.4	-6.5	-6.46667	0.057735
fda_ligand_1070.pdbqt	ZINC000000056427	eurax	-6.4	-6.5	-6.5	-6.46667	0.057735
fda_ligand_1082.pdbqt	ZINC000000896819	sotalol	-6.3	-6.6	-6.5	-6.46667	0.152753
fda_ligand_1418.pdbqt	ZINC000000000751	tbz	-6.3	-6.5	-6.6	-6.46667	0.152753
fda_ligand_1431.pdbqt	ZINC000000968275	trimipramine	-6.4	-6.4	-6.6	-6.46667	0.11547
fda_ligand_1469.pdbqt	ZINC000003801919	alendronate	-6.5	-6.4	-6.5	-6.46667	0.057735
fda_ligand_1471.pdbqt	ZINC000003801919	alendronate	-6.5	-6.4	-6.5	-6.46667	0.057735
fda_ligand_1482.pdbqt	ZINC000000266964	tyr	-6.3	-6.6	-6.5	-6.46667	0.152753
fda_ligand_1517.pdbqt	ZINC000000000469	orciprenaline	-6.4	-6.4	-6.6	-6.46667	0.11547
fda_ligand_1582.pdbqt	ZINC000019166991	phenelzine	-6.4	-6.5	-6.5	-6.46667	0.057735
fda_ligand_1745.pdbqt	ZINC000003805768	ivabradine	-6.6	-6.5	-6.3	-6.46667	0.152753
fda_ligand_0058.pdbqt	ZINC000002599970	formoterol	-6.9	-5.9	-6.5	-6.43333	0.503322
fda_ligand_0224.pdbqt	ZINC000001530863	primaquine	-6.5	-6.6	-6.2	-6.43333	0.208167
fda_ligand_0564.pdbqt	ZINC000003875392	tbz	-6.4	-6.4	-6.5	-6.43333	0.057735
fda_ligand_0631.pdbqt	ZINC000000057624	adrenor	-6.5	-6.4	-6.4	-6.43333	0.057735
fda_ligand_0689.pdbqt	ZINC000000000128	carteolol	-6.3	-6.5	-6.5	-6.43333	0.11547
fda_ligand_0840.pdbqt	ZINC000000538065	nefazodone	-6.3	-6.8	-6.2	-6.43333	0.321455
fda_ligand_0873.pdbqt	ZINC000004475353	sulindac	-6.3	-6.5	-6.5	-6.43333	0.11547
fda_ligand_0884.pdbqt	ZINC000001530973	butoconazole	-5.8	-6.7	-6.8	-6.43333	0.550757
fda_ligand_0892.pdbqt	ZINC000001530977	naftifine	-6.2	-6.4	-6.7	-6.43333	0.251661
fda_ligand_1437.pdbqt	ZINC000000897322	skelaxin	-6.5	-6.3	-6.5	-6.43333	0.11547
fda_ligand_1509.pdbqt	ZINC000000607971	miconazole	-6.5	-6.4	-6.4	-6.43333	0.057735
fda_ligand_1722.pdbqt	ZINC000003875393	tbz	-6.4	-6.4	-6.5	-6.43333	0.057735
fda_ligand_1747.pdbqt	ZINC000003812867	perindopril	-6.4	-6.4	-6.5	-6.43333	0.057735
fda_ligand_1929.pdbqt	ZINC000043195697	valbenazine	-6.7	-6.2	-6.4	-6.43333	0.251661
fda_ligand_0142.pdbqt	ZINC000001542392	alfuzosin	-6.3	-6.6	-6.4	-6.43333	0.152753
fda_ligand_0475.pdbqt	ZINC000000000973	avobenzone	-6.3	-6.6	-6.4	-6.43333	0.152753
fda_ligand_0507.pdbqt	ZINC000000968375	ZINC968375	-6.3	-6.6	-6.4	-6.43333	0.152753
fda_ligand_2087.pdbqt	ZINC000034608502	umeclidinium	-6.6	-6.6	-6.1	-6.43333	0.288675
fda_ligand_0137.pdbqt	ZINC000000538266	quazepam	-6.4	-6.4	-6.4	-6.4	0
fda_ligand_0152.pdbqt	ZINC000000136138	oxybenzone	-6.4	-6.4	-6.4	-6.4	0
fda_ligand_1709.pdbqt	ZINC000003629271	emtriva	-6.3	-6.5	-6.4	-6.4	0.1
fda_ligand_1723.pdbqt	ZINC000003875393	tbz	-6.4	-6.4	-6.4	-6.4	0
fda_ligand_1724.pdbqt	ZINC000003875393	tbz	-6.4	-6.4	-6.4	-6.4	0
fda_ligand_1726.pdbqt	ZINC000000056556	propranolol	-6.2	-6.6	-6.4	-6.4	0.2
fda_ligand_0249.pdbqt	ZINC000003780893	simvastatin	-6.3	-6.4	-6.5	-6.4	0.1
fda_ligand_0344.pdbqt	ZINC000253530025	ZINC253530025	-6.2	-6.5	-6.5	-6.4	0.173205
fda_ligand_0585.pdbqt	ZINC000000113415	altol	-6.3	-6.2	-6.7	-6.4	0.264575
fda_ligand_0746.pdbqt	ZINC000035999642	ketamine	-6.4	-6.3	-6.5	-6.4	0.1
fda_ligand_0747.pdbqt	ZINC000035999642	ketamine	-6.4	-6.3	-6.5	-6.4	0.1
fda_ligand_0921.pdbqt	ZINC000001530599	chlorporpamide	-6.3	-6.4	-6.5	-6.4	0.1
fda_ligand_1090.pdbqt	ZINC000001530580	coreg	-6.8	-6.7	-5.7	-6.4	0.608276
fda_ligand_1176.pdbqt	ZINC000000402830	clemastine	-6.3	-6.7	-6.2	-6.4	0.264575
fda_ligand_1297.pdbqt	ZINC000100036536	benztropine	-6.1	-6.8	-6.3	-6.4	0.360555
fda_ligand_1470.pdbqt	ZINC000003801919	alendronate	-6.5	-6.4	-6.3	-6.4	0.1
fda_ligand_1850.pdbqt	ZINC000000008667	flurbiprofen	-6.3	-6.3	-6.6	-6.4	0.173205
fda_ligand_2028.pdbqt	ZINC000012859773	metformin	-6.4	-6.3	-6.5	-6.4	0.1
fda_ligand_0100.pdbqt	ZINC000012360535	hydralazine	-6.4	-6.3	-6.4	-6.36667	0.057735
fda_ligand_0143.pdbqt	ZINC000001542392	alfuzosin	-6	-6.9	-6.2	-6.36667	0.472582
fda_ligand_0207.pdbqt	ZINC000001530981	terbinafine	-6.5	-6.2	-6.4	-6.36667	0.152753
fda_ligand_0208.pdbqt	ZINC000001530862	primaquine	-6.5	-6.3	-6.3	-6.36667	0.11547
fda_ligand_0372.pdbqt	ZINC000000057435	oxymetazoline	-6.2	-6.4	-6.5	-6.36667	0.152753
fda_ligand_0471.pdbqt	ZINC000011680943	lisdexamfetamine	-6.3	-6.4	-6.4	-6.36667	0.057735
fda_ligand_0714.pdbqt	ZINC000019632912	imiquimod	-6.4	-6.3	-6.4	-6.36667	0.057735
fda_ligand_0912.pdbqt	ZINC000002522669	fentanyl	-6.1	-6.6	-6.4	-6.36667	0.251661
fda_ligand_1025.pdbqt	ZINC000006382803	ZINC6382803	-6.3	-6.4	-6.4	-6.36667	0.057735
fda_ligand_1078.pdbqt	ZINC000000896463	carteolol	-6.2	-6.3	-6.6	-6.36667	0.208167
fda_ligand_1243.pdbqt	ZINC000100009278	atropine	-6.3	-6.4	-6.4	-6.36667	0.057735
fda_ligand_1625.pdbqt	ZINC000001530638	fluoxetine	-6.2	-6.3	-6.6	-6.36667	0.208167
fda_ligand_1641.pdbqt	ZINC000001530769	propoxyphene	-6.1	-6.5	-6.5	-6.36667	0.23094
fda_ligand_1692.pdbqt	ZINC000001853550	sertraline	-6.7	-6.1	-6.3	-6.36667	0.305505
fda_ligand_1715.pdbqt	ZINC000003812933	memantine	-6.4	-6.3	-6.4	-6.36667	0.057735
fda_ligand_1839.pdbqt	ZINC000000154964	mepivacaine	-6.4	-6.3	-6.4	-6.36667	0.057735
fda_ligand_1840.pdbqt	ZINC000000154964	mepivacaine	-6.4	-6.2	-6.5	-6.36667	0.152753
fda_ligand_2014.pdbqt	ZINC000000897256	formoterol	-6.5	-6.6	-6	-6.36667	0.321455
fda_ligand_0312.pdbqt	ZINC000000596881	econazole	-6.8	-6.1	-6.1	-6.33333	0.404145
fda_ligand_0384.pdbqt	ZINC000000591993	sular	-6.2	-6	-6.8	-6.33333	0.416333
fda_ligand_0451.pdbqt	ZINC000000014257	celontin	-6.3	-6.2	-6.5	-6.33333	0.152753
fda_ligand_0461.pdbqt	ZINC000001530652	hydroxychloroquine	-6.4	-6.3	-6.3	-6.33333	0.057735
fda_ligand_0580.pdbqt	ZINC000000538386	sufentanil	-6.1	-6.5	-6.4	-6.33333	0.208167
fda_ligand_0719.pdbqt	ZINC000017146904	albenza	-6.3	-6.2	-6.5	-6.33333	0.152753
fda_ligand_0924.pdbqt	ZINC000001530601	clomifene	-6.2	-6.4	-6.4	-6.33333	0.11547
fda_ligand_0959.pdbqt	ZINC000004097426	glyset	-6.2	-6.3	-6.5	-6.33333	0.152753
fda_ligand_1052.pdbqt	ZINC000000056652	isoproterenol	-6.1	-6.5	-6.4	-6.33333	0.208167
fda_ligand_1089.pdbqt	ZINC000001530580	coreg	-6.7	-5.9	-6.4	-6.33333	0.404145
fda_ligand_1118.pdbqt	ZINC000001530741	nortriptyline	-6.2	-6.4	-6.4	-6.33333	0.11547
fda_ligand_1230.pdbqt	ZINC000000608101	vagistat-1	-6.1	-6.4	-6.5	-6.33333	0.208167
fda_ligand_1284.pdbqt	ZINC000100015780	ipratropium	-6.1	-6.7	-6.2	-6.33333	0.321455
fda_ligand_1343.pdbqt	ZINC000030691760	cleviprex	-6	-6.9	-6.1	-6.33333	0.493288
fda_ligand_1395.pdbqt	ZINC000003920355	ZINC3920355	-6.2	-6.5	-6.3	-6.33333	0.152753
fda_ligand_1546.pdbqt	ZINC000000020240	propranolol	-6.5	-6.2	-6.3	-6.33333	0.152753
fda_ligand_1750.pdbqt	ZINC000000968257	amitriptyline	-6.3	-6.3	-6.4	-6.33333	0.057735
fda_ligand_1826.pdbqt	ZINC000022447798	gadoversetamide	-6.1	-6.6	-6.3	-6.33333	0.251661
fda_ligand_1846.pdbqt	ZINC000000000323	flurbiprofen	-6	-6.3	-6.7	-6.33333	0.351188
fda_ligand_0323.pdbqt	ZINC000004474405	latisse	-6.2	-5.9	-6.8	-6.3	0.458258
fda_ligand_1596.pdbqt	ZINC000000012346	epivir	-6.2	-6.4	-6.3	-6.3	0.1
fda_ligand_1610.pdbqt	ZINC000000643046	persantine	-6.2	-6.4	-6.3	-6.3	0.1
fda_ligand_0125.pdbqt	ZINC000009224016	milrinone	-6.1	-6.4	-6.4	-6.3	0.173205
fda_ligand_0202.pdbqt	ZINC000000002101	avc	-6	-6.4	-6.5	-6.3	0.264575
fda_ligand_0262.pdbqt	ZINC000001530303	ilopan	-6.1	-6.4	-6.4	-6.3	0.173205
fda_ligand_0299.pdbqt	ZINC000000896484	nexiclon	-6	-6.6	-6.3	-6.3	0.3
fda_ligand_0300.pdbqt	ZINC000000896484	nexiclon	-6	-6.6	-6.3	-6.3	0.3
fda_ligand_0311.pdbqt	ZINC000000596881	econazole	-6.3	-6.4	-6.2	-6.3	0.1
fda_ligand_0563.pdbqt	ZINC000003875392	tbz	-5.9	-6.6	-6.4	-6.3	0.360555
fda_ligand_0693.pdbqt	ZINC000001530697	thioridazine	-6.3	-6.3	-6.3	-6.3	0
fda_ligand_0799.pdbqt	ZINC000001530814	bupivacaine	-6.2	-6.3	-6.4	-6.3	0.1
fda_ligand_0857.pdbqt	ZINC000000001331	doxepin	-6.3	-6.3	-6.3	-6.3	0
fda_ligand_0860.pdbqt	ZINC000012466082	luvox	-6	-6.2	-6.7	-6.3	0.360555
fda_ligand_0971.pdbqt	ZINC000003775644	proflavine	-6.2	-6.3	-6.4	-6.3	0.1
fda_ligand_0986.pdbqt	ZINC000000057533	mydriacyl	-6.2	-6.3	-6.4	-6.3	0.1
fda_ligand_1018.pdbqt	ZINC000000057512	tolazamide	-6.4	-6.1	-6.4	-6.3	0.173205
fda_ligand_1113.pdbqt	ZINC000013550868	acetaminophen	-6.3	-6.2	-6.4	-6.3	0.1
fda_ligand_1287.pdbqt	ZINC000100001964	amlodipine	-6.1	-6.5	-6.3	-6.3	0.2
fda_ligand_1324.pdbqt	ZINC000095452610	chloroguanide	-6.3	-6.3	-6.3	-6.3	0
fda_ligand_1331.pdbqt	ZINC000100001965	amlodipine	-6.2	-6.3	-6.4	-6.3	0.1
fda_ligand_1631.pdbqt	ZINC000001530695	thioridazine	-6.3	-6.2	-6.4	-6.3	0.1
fda_ligand_1706.pdbqt	ZINC000003831165	corgard	-6.2	-6.3	-6.4	-6.3	0.1
fda_ligand_1729.pdbqt	ZINC000000001979	mysoline	-6.2	-6.3	-6.4	-6.3	0.1
fda_ligand_1742.pdbqt	ZINC000003872277	diazoxide	-6.3	-6.3	-6.3	-6.3	0
fda_ligand_2017.pdbqt	ZINC000000897258	formoterol	-6.2	-6.3	-6.4	-6.3	0.1
fda_ligand_0049.pdbqt	ZINC000000006016	effexor	-6.4	-6.1	-6.3	-6.26667	0.152753
fda_ligand_0238.pdbqt	ZINC000002539702	fujiglucon	-6.3	-6.2	-6.3	-6.26667	0.057735
fda_ligand_0345.pdbqt	ZINC000013512456	teriflunomide	-6.2	-6.4	-6.2	-6.26667	0.11547
fda_ligand_0382.pdbqt	ZINC000012484958	retin-a	-6.2	-6.3	-6.3	-6.26667	0.057735
fda_ligand_0460.pdbqt	ZINC000001530652	hydroxychloroquine	-6.2	-6.3	-6.3	-6.26667	0.057735
fda_ligand_0600.pdbqt	ZINC000000621853	colcrys	-6.3	-6.3	-6.2	-6.26667	0.057735
fda_ligand_0803.pdbqt	ZINC000001530817	prilocaine	-6.2	-6.3	-6.3	-6.26667	0.057735
fda_ligand_0812.pdbqt	ZINC000001530912	emedastine	-6.1	-6.4	-6.3	-6.26667	0.152753
fda_ligand_0856.pdbqt	ZINC000000001267	methylphenidate	-5.7	-6.6	-6.5	-6.26667	0.493288
fda_ligand_0891.pdbqt	ZINC000001530977	naftifine	-6.4	-5.9	-6.5	-6.26667	0.321455
fda_ligand_0969.pdbqt	ZINC000001895505	bazedoxifene	-5.9	-6.7	-6.2	-6.26667	0.404145
fda_ligand_0970.pdbqt	ZINC000003775644	proflavine	-6.2	-6.3	-6.3	-6.26667	0.057735
fda_ligand_1035.pdbqt	ZINC000001552908	fesoterodine	-6	-6.6	-6.2	-6.26667	0.305505
fda_ligand_1149.pdbqt	ZINC000000000853	tramadol	-6.4	-6.4	-6	-6.26667	0.23094
fda_ligand_1180.pdbqt	ZINC000000403609	betimol	-6.2	-6.2	-6.4	-6.26667	0.11547
fda_ligand_1432.pdbqt	ZINC000001842633	tomoxetine	-6	-6.5	-6.3	-6.26667	0.251661
fda_ligand_1632.pdbqt	ZINC000001530695	thioridazine	-6.2	-6.2	-6.4	-6.26667	0.11547
fda_ligand_1989.pdbqt	ZINC000003972949	ioflupane	-6.2	-6.3	-6.3	-6.26667	0.057735
fda_ligand_0294.pdbqt	ZINC000000020231	apraclonidine	-6	-6.7	-6.1	-6.26667	0.378594
fda_ligand_0472.pdbqt	ZINC000011680943	lisdexamfetamine	-6.3	-6.4	-6.1	-6.26667	0.152753
fda_ligand_1941.pdbqt	ZINC000252678020	ZINC252678020	-6.1	-6.3	-6.4	-6.26667	0.152753
fda_ligand_1711.pdbqt	ZINC000003781664	pramipexole	-6.1	-6.2	-6.4	-6.23333	0.152753
fda_ligand_0048.pdbqt	ZINC000000006016	effexor	-6.4	-6	-6.3	-6.23333	0.208167
fda_ligand_0367.pdbqt	ZINC000253476025	ZINC253476025	-5.9	-6.6	-6.2	-6.23333	0.351188
fda_ligand_0420.pdbqt	ZINC000000113446	tindamax	-6.2	-6.3	-6.2	-6.23333	0.057735
fda_ligand_0463.pdbqt	ZINC000001530652	hydroxychloroquine	-6.2	-6.5	-6	-6.23333	0.251661
fda_ligand_0496.pdbqt	ZINC000004392649	tasimelteon	-6.2	-6.2	-6.3	-6.23333	0.057735
fda_ligand_0678.pdbqt	ZINC000001530816	prilocaine	-6.2	-6.3	-6.2	-6.23333	0.057735
fda_ligand_0798.pdbqt	ZINC000001536779	duloxetine	-6.4	-6.3	-6	-6.23333	0.208167
fda_ligand_0889.pdbqt	ZINC000001530975	butenafine	-6.2	-5.7	-6.8	-6.23333	0.550757
fda_ligand_0893.pdbqt	ZINC000001530977	naftifine	-6.2	-6.5	-6	-6.23333	0.251661
fda_ligand_0931.pdbqt	ZINC000001531009	risedronate	-6	-6.4	-6.3	-6.23333	0.208167
fda_ligand_1054.pdbqt	ZINC000000113355	phenylephrine	-6.2	-6.3	-6.2	-6.23333	0.057735
fda_ligand_1068.pdbqt	ZINC000000033882	dopamine	-6.2	-6.3	-6.2	-6.23333	0.057735
fda_ligand_1099.pdbqt	ZINC000001530637	fluoxetine	-6.1	-6.3	-6.3	-6.23333	0.11547
fda_ligand_1151.pdbqt	ZINC000000001688	asacol	-6.2	-6.3	-6.2	-6.23333	0.057735
fda_ligand_1183.pdbqt	ZINC000000000693	demser	-6.1	-6.3	-6.3	-6.23333	0.11547
fda_ligand_1198.pdbqt	ZINC000006661227	histidine	-6.1	-6.3	-6.3	-6.23333	0.11547
fda_ligand_1229.pdbqt	ZINC000000608101	vagistat-1	-6.2	-6.3	-6.2	-6.23333	0.057735
fda_ligand_1325.pdbqt	ZINC000095452610	chloroguanide	-6.3	-6.3	-6.1	-6.23333	0.11547
fda_ligand_1330.pdbqt	ZINC000096942201	felodipine	-6.3	-6.3	-6.1	-6.23333	0.11547
fda_ligand_1734.pdbqt	ZINC000003872605	fluvoxamine	-6.1	-6.1	-6.5	-6.23333	0.23094
fda_ligand_1817.pdbqt	ZINC000000020245	tofranil	-6.2	-6	-6.5	-6.23333	0.251661
fda_ligand_0126.pdbqt	ZINC000009224016	milrinone	-6.1	-6.4	-6.1	-6.2	0.173205
fda_ligand_0150.pdbqt	ZINC000000000746	terbutaline	-6.2	-6.2	-6.2	-6.2	0
fda_ligand_0203.pdbqt	ZINC000001530751	oxybutynin	-5.9	-6.4	-6.3	-6.2	0.264575
fda_ligand_0801.pdbqt	ZINC000001530814	bupivacaine	-6.2	-6.1	-6.3	-6.2	0.1
fda_ligand_0828.pdbqt	ZINC000008214619	ZINC8214619	-6.3	-6	-6.3	-6.2	0.173205
fda_ligand_0919.pdbqt	ZINC000000155531	cyclopentolate	-6	-6.4	-6.2	-6.2	0.2
fda_ligand_0922.pdbqt	ZINC000001530599	chlorporpamide	-6.5	-6	-6.1	-6.2	0.264575
fda_ligand_0987.pdbqt	ZINC000000056646	pindolol	-6	-6.3	-6.3	-6.2	0.173205
fda_ligand_0990.pdbqt	ZINC000000057278	dobutamine	-6.3	-6.2	-6.1	-6.2	0.1
fda_ligand_1016.pdbqt	ZINC000000057512	tolazamide	-6	-6.4	-6.2	-6.2	0.2
fda_ligand_1172.pdbqt	ZINC000000968263	cyclobenzaprine	-6	-6.3	-6.3	-6.2	0.173205
fda_ligand_1271.pdbqt	ZINC000000056645	pindolol	-6.2	-6.3	-6.1	-6.2	0.1
fda_ligand_1438.pdbqt	ZINC000000968274	trihexyphenidyl	-6.1	-6.2	-6.3	-6.2	0.1
fda_ligand_1651.pdbqt	ZINC000003798734	acetretin	-6.2	-6.1	-6.3	-6.2	0.1
fda_ligand_1818.pdbqt	ZINC000000020248	clomipramine	-6	-6.3	-6.3	-6.2	0.173205
fda_ligand_2080.pdbqt	ZINC000013831141	enzacamene	-6	-6.2	-6.4	-6.2	0.2
fda_ligand_0577.pdbqt	ZINC000012503099	triprolidine	-6.1	-6.3	-6.2	-6.2	0.1
fda_ligand_0578.pdbqt	ZINC000012503099	triprolidine	-6.1	-6.3	-6.2	-6.2	0.1
fda_ligand_0932.pdbqt	ZINC000001531009	risedronate	-6.1	-6.3	-6.2	-6.2	0.1
fda_ligand_1148.pdbqt	ZINC000000000850	zyflo	-6.1	-6.3	-6.2	-6.2	0.1
fda_ligand_1673.pdbqt	ZINC000000001681	pethidine	-6.1	-6.3	-6.2	-6.2	0.1
fda_ligand_1990.pdbqt	ZINC000003972949	ioflupane	-6.3	-6.1	-6.2	-6.2	0.1
fda_ligand_0571.pdbqt	ZINC000000002216	hand	-6	-6.1	-6.4	-6.16667	0.208167
fda_ligand_0636.pdbqt	ZINC000000034157	nordefrin	-6.1	-6.2	-6.2	-6.16667	0.057735
fda_ligand_0643.pdbqt	ZINC000000000882	ade	-6.1	-6.2	-6.2	-6.16667	0.057735
fda_ligand_0676.pdbqt	ZINC000000075008	pilocarpine	-6.1	-6.1	-6.3	-6.16667	0.11547
fda_ligand_0695.pdbqt	ZINC000001530703	tolbutamide	-6	-6.3	-6.2	-6.16667	0.152753
fda_ligand_0804.pdbqt	ZINC000000001145	ciclopirox	-6.2	-6.1	-6.2	-6.16667	0.057735
fda_ligand_0831.pdbqt	ZINC000003803652	zoledronate	-6.1	-6.1	-6.3	-6.16667	0.11547
fda_ligand_0839.pdbqt	ZINC000000538065	nefazodone	-6.5	-6.4	-5.6	-6.16667	0.493288
fda_ligand_0844.pdbqt	ZINC000000020221	nabumetona	-5.9	-6.3	-6.3	-6.16667	0.23094
fda_ligand_0890.pdbqt	ZINC000001530975	butenafine	-5.9	-5.7	-6.9	-6.16667	0.64291
fda_ligand_0920.pdbqt	ZINC000001530599	chlorporpamide	-6.1	-6.2	-6.2	-6.16667	0.057735
fda_ligand_0933.pdbqt	ZINC000001531009	risedronate	-6	-6.3	-6.2	-6.16667	0.152753
fda_ligand_1141.pdbqt	ZINC000001530568	betaxolol	-6	-6.3	-6.2	-6.16667	0.152753
fda_ligand_1242.pdbqt	ZINC000100009278	atropine	-6	-6.5	-6	-6.16667	0.288675
fda_ligand_1308.pdbqt	ZINC000096942202	felodipine	-6.1	-6.1	-6.3	-6.16667	0.11547
fda_ligand_1421.pdbqt	ZINC000000005151	neupro	-6	-6.4	-6.1	-6.16667	0.208167
fda_ligand_1529.pdbqt	ZINC000000584092	fnf	-6.1	-6.2	-6.2	-6.16667	0.057735
fda_ligand_1564.pdbqt	ZINC000000001408	amidate	-6.1	-6.1	-6.3	-6.16667	0.11547
fda_ligand_1597.pdbqt	ZINC000000014007	altol	-6.2	-6.2	-6.1	-6.16667	0.057735
fda_ligand_1620.pdbqt	ZINC000000004028	neupro	-6.1	-6.2	-6.2	-6.16667	0.057735
fda_ligand_1630.pdbqt	ZINC000001530695	thioridazine	-6	-6.3	-6.2	-6.16667	0.152753
fda_ligand_1672.pdbqt	ZINC000000001681	pethidine	-6.1	-6.2	-6.2	-6.16667	0.057735
fda_ligand_1708.pdbqt	ZINC000072267023	eliglustat	-5.9	-6.3	-6.3	-6.16667	0.23094
fda_ligand_1782.pdbqt	ZINC000001850376	nix	-6.4	-6.1	-6	-6.16667	0.208167
fda_ligand_1852.pdbqt	ZINC000022443609	plerixafor	-6.1	-6.1	-6.3	-6.16667	0.11547
fda_ligand_1951.pdbqt	ZINC000000057513	thonzylamine	-6	-6.2	-6.3	-6.16667	0.152753
fda_ligand_2078.pdbqt	ZINC000003995807	faslodex	-6	-6.2	-6.3	-6.16667	0.152753
fda_ligand_0204.pdbqt	ZINC000001530751	oxybutynin	-6.4	-5.9	-6.1	-6.13333	0.251661
fda_ligand_0221.pdbqt	ZINC000000085733	baclofen	-6.1	-6.1	-6.2	-6.13333	0.057735
fda_ligand_0244.pdbqt	ZINC000033943508	dcva	-5.8	-6.1	-6.5	-6.13333	0.351188
fda_ligand_0279.pdbqt	ZINC000100006770	vasc	-6	-6.2	-6.2	-6.13333	0.11547
fda_ligand_0430.pdbqt	ZINC000003812862	pamidronate	-6.1	-6.2	-6.1	-6.13333	0.057735
fda_ligand_0675.pdbqt	ZINC000000075008	pilocarpine	-6.1	-6.1	-6.2	-6.13333	0.057735
fda_ligand_0791.pdbqt	ZINC000001530716	metoclopramide	-6.1	-6.1	-6.2	-6.13333	0.057735
fda_ligand_0805.pdbqt	ZINC000000001145	ciclopirox	-6.1	-6.1	-6.2	-6.13333	0.057735
fda_ligand_0918.pdbqt	ZINC000000155531	cyclopentolate	-6	-6.3	-6.1	-6.13333	0.152753
fda_ligand_1340.pdbqt	ZINC000030691763	cleviprex	-5.9	-6.4	-6.1	-6.13333	0.251661
fda_ligand_1356.pdbqt	ZINC000000896731	zyflo	-6.1	-6.1	-6.2	-6.13333	0.057735
fda_ligand_1422.pdbqt	ZINC000000005151	neupro	-6.1	-6.2	-6.1	-6.13333	0.057735
fda_ligand_1468.pdbqt	ZINC000003831417	retinol	-6.1	-5.9	-6.4	-6.13333	0.251661
fda_ligand_1505.pdbqt	ZINC000003830212	amiodarone	-6.2	-6.1	-6.1	-6.13333	0.057735
fda_ligand_1639.pdbqt	ZINC000001530762	proparacaine	-6	-6.2	-6.2	-6.13333	0.11547
fda_ligand_1640.pdbqt	ZINC000001530762	proparacaine	-6	-6.2	-6.2	-6.13333	0.11547
fda_ligand_1643.pdbqt	ZINC000003830339	bunolol	-6	-6.2	-6.2	-6.13333	0.11547
fda_ligand_0373.pdbqt	ZINC000000057534	xylometazoline	-6	-6.1	-6.2	-6.1	0.1
fda_ligand_0498.pdbqt	ZINC000253476027	ZINC253476027	-6.1	-6.5	-5.7	-6.1	0.4
fda_ligand_0859.pdbqt	ZINC000012466082	luvox	-5.9	-6.2	-6.2	-6.1	0.173205
fda_ligand_0928.pdbqt	ZINC000001530939	dibucaine	-6	-6	-6.3	-6.1	0.173205
fda_ligand_1030.pdbqt	ZINC000000002281	terbutaline	-5.9	-6.1	-6.3	-6.1	0.2
fda_ligand_1091.pdbqt	ZINC000051951647	ZINC51951647	-5.5	-6.8	-6	-6.1	0.655744
fda_ligand_1265.pdbqt	ZINC000012503177	caverject	-5.8	-6.3	-6.2	-6.1	0.264575
fda_ligand_1283.pdbqt	ZINC000100015775	ipratropium	-6.1	-6.5	-5.7	-6.1	0.4
fda_ligand_1313.pdbqt	ZINC000100019007	dtic	-5.9	-6.2	-6.2	-6.1	0.173205
fda_ligand_1629.pdbqt	ZINC000001530654	hydroxychloroquine	-5.8	-6.2	-6.3	-6.1	0.264575
fda_ligand_1822.pdbqt	ZINC000003831586	trimipramine	-5.8	-6.2	-6.3	-6.1	0.264575
fda_ligand_0718.pdbqt	ZINC000017146904	albenza	-6	-6.2	-6.1	-6.1	0.1
fda_ligand_1024.pdbqt	ZINC000006382803	ZINC6382803	-6.1	-6.1	-6.1	-6.1	0
fda_ligand_1043.pdbqt	ZINC000001531036	azelex	-5.9	-6.3	-6.1	-6.1	0.2
fda_ligand_1163.pdbqt	ZINC000022016981	calteridol	-6.1	-6.1	-6.1	-6.1	0
fda_ligand_1357.pdbqt	ZINC000000896731	zyflo	-6.1	-6.1	-6.1	-6.1	0
fda_ligand_1684.pdbqt	ZINC000000003911	dobutamine	-6.3	-6.1	-5.9	-6.1	0.2
fda_ligand_1139.pdbqt	ZINC000001530617	disopyramide	-5.7	-6.1	-6.4	-6.06667	0.351188
fda_ligand_1140.pdbqt	ZINC000001530567	betaxolol	-6	-6.3	-5.9	-6.06667	0.208167
fda_ligand_1355.pdbqt	ZINC000000896703	celontin	-5.9	-5.9	-6.4	-6.06667	0.288675
fda_ligand_1508.pdbqt	ZINC000000601250	sulconazole	-5.7	-6.4	-6.1	-6.06667	0.351188
fda_ligand_0184.pdbqt	ZINC000001846431	ZINC1846431	-6	-6	-6.2	-6.06667	0.11547
fda_ligand_0374.pdbqt	ZINC000000968273	trihexyphenidyl	-6	-6.2	-6	-6.06667	0.11547
fda_ligand_0467.pdbqt	ZINC000000006310	aczone	-6	-6.2	-6	-6.06667	0.11547
fda_ligand_0535.pdbqt	ZINC000000395010	ZINC395010	-6	-6.1	-6.1	-6.06667	0.057735
fda_ligand_0611.pdbqt	ZINC000000105196	phe	-6	-6	-6.2	-6.06667	0.11547
fda_ligand_0883.pdbqt	ZINC000001530718	metoprolol	-5.9	-6.1	-6.2	-6.06667	0.152753
fda_ligand_0989.pdbqt	ZINC000000057206	bupropion	-5.9	-6.1	-6.2	-6.06667	0.152753
fda_ligand_1001.pdbqt	ZINC000000001382	ethacrynate	-6	-6.2	-6	-6.06667	0.11547
fda_ligand_1036.pdbqt	ZINC000000000922	pas	-6	-6.2	-6	-6.06667	0.11547
fda_ligand_1048.pdbqt	ZINC000000002055	salicylamide	-6	-6.1	-6.1	-6.06667	0.057735
fda_ligand_1135.pdbqt	ZINC000001530689	tamoxifen	-5.8	-5.9	-6.5	-6.06667	0.378594
fda_ligand_1150.pdbqt	ZINC000000001688	asacol	-6	-6.1	-6.1	-6.06667	0.057735
fda_ligand_1160.pdbqt	ZINC000022016976	calteridol	-5.9	-6.1	-6.2	-6.06667	0.152753
fda_ligand_1199.pdbqt	ZINC000006661227	histidine	-6.1	-6	-6.1	-6.06667	0.057735
fda_ligand_1231.pdbqt	ZINC000004474682	travoprost	-5.9	-6.1	-6.2	-6.06667	0.152753
fda_ligand_1233.pdbqt	ZINC000004632106	medetomidine	-6	-6.1	-6.1	-6.06667	0.057735
fda_ligand_1449.pdbqt	ZINC000012402836	clomifeno	-6	-6.1	-6.1	-6.06667	0.057735
fda_ligand_1506.pdbqt	ZINC000003830212	amiodarone	-5.9	-6.1	-6.2	-6.06667	0.152753
fda_ligand_1605.pdbqt	ZINC000019144216	pyrilamine	-6	-6.1	-6.1	-6.06667	0.057735
fda_ligand_2018.pdbqt	ZINC000000897291	ethotoin	-6.1	-6	-6.1	-6.06667	0.057735
fda_ligand_0119.pdbqt	ZINC000001554588	acamprosate	-6	-6.2	-5.9	-6.03333	0.152753
fda_ligand_0139.pdbqt	ZINC000000113442	metronidazole	-6	-6.1	-6	-6.03333	0.057735
fda_ligand_0261.pdbqt	ZINC000003800706	citalopram	-5.7	-6.6	-5.8	-6.03333	0.493288
fda_ligand_0398.pdbqt	ZINC000009302201	retin-a	-5.8	-6	-6.3	-6.03333	0.251661
fda_ligand_0427.pdbqt	ZINC000012358719	opahl	-6	-6.1	-6	-6.03333	0.057735
fda_ligand_0462.pdbqt	ZINC000001530652	hydroxychloroquine	-5.9	-6.2	-6	-6.03333	0.152753
fda_ligand_0570.pdbqt	ZINC000000002216	hand	-6	-6.1	-6	-6.03333	0.057735
fda_ligand_0658.pdbqt	ZINC000019362735	chlorcyclizine	-6	-5.9	-6.2	-6.03333	0.152753
fda_ligand_0686.pdbqt	ZINC000000000242	doxylamine	-5.7	-6.3	-6.1	-6.03333	0.305505
fda_ligand_0690.pdbqt	ZINC000001530974	butoconazole	-6	-6.1	-6	-6.03333	0.057735
fda_ligand_0787.pdbqt	ZINC000001530706	diskets	-6	-6	-6.1	-6.03333	0.057735
fda_ligand_0800.pdbqt	ZINC000001530814	bupivacaine	-6	-6	-6.1	-6.03333	0.057735
fda_ligand_0811.pdbqt	ZINC000001530912	emedastine	-5.9	-6.2	-6	-6.03333	0.152753
fda_ligand_1117.pdbqt	ZINC000001530717	metoprolol	-5.9	-6.3	-5.9	-6.03333	0.23094
fda_ligand_1193.pdbqt	ZINC000034781704	clopidogrel	-6	-6	-6.1	-6.03333	0.057735
fda_ligand_1232.pdbqt	ZINC000004577910	pralidoxime	-6	-6	-6.1	-6.03333	0.057735
fda_ligand_1420.pdbqt	ZINC000000056568	benzenebutyrate	-6	-6	-6.1	-6.03333	0.057735
fda_ligand_1619.pdbqt	ZINC000000004028	neupro	-6.1	-6	-6	-6.03333	0.057735
fda_ligand_1688.pdbqt	ZINC000003812888	verapamil	-6.2	-5.7	-6.2	-6.03333	0.288675
fda_ligand_1823.pdbqt	ZINC000003830990	keppra	-6	-6	-6.1	-6.03333	0.057735
fda_ligand_1864.pdbqt	ZINC000001550499	cinacalcet	-5.7	-6.3	-6.1	-6.03333	0.305505
fda_ligand_1940.pdbqt	ZINC000252678020	ZINC252678020	-5.9	-6.1	-6.1	-6.03333	0.11547
fda_ligand_1945.pdbqt	ZINC000000000711	secnidazole	-6	-6	-6.1	-6.03333	0.057735
fda_ligand_1960.pdbqt	ZINC000001530938	chloroprocaine	-6	-6	-6.1	-6.03333	0.057735
fda_ligand_2079.pdbqt	ZINC000003995811	faslodex	-5.7	-6.1	-6.3	-6.03333	0.305505
fda_ligand_2085.pdbqt	ZINC000017285869	ZINC17285869	-5.9	-6.2	-6	-6.03333	0.152753
fda_ligand_0806.pdbqt	ZINC000000389149	metipranolol	-6.1	-5.8	-6.2	-6.03333	0.208167
fda_ligand_1235.pdbqt	ZINC000006733300	lorcaserin	-6.1	-5.8	-6.2	-6.03333	0.208167
fda_ligand_1771.pdbqt	ZINC000003926298	faslodex	-6.1	-5.8	-6.2	-6.03333	0.208167
fda_ligand_1969.pdbqt	ZINC000001843047	secnidazole	-6.1	-5.8	-6.2	-6.03333	0.208167
fda_ligand_2045.pdbqt	ZINC000043194409	florbetaben	-6.3	-6.1	-5.7	-6.03333	0.305505
fda_ligand_0297.pdbqt	ZINC000000596731	tikosyn	-5.9	-5.7	-6.4	-6	0.360555
fda_ligand_0316.pdbqt	ZINC000000009342	desvenlafaxine	-6.2	-5.9	-5.9	-6	0.173205
fda_ligand_0340.pdbqt	ZINC000148723177	ZINC148723177	-5.9	-5.9	-6.2	-6	0.173205
fda_ligand_0449.pdbqt	ZINC000000000196	cyclopentolate	-6	-5.9	-6.1	-6	0.1
fda_ligand_0699.pdbqt	ZINC000001530707	diskets	-5.8	-5.9	-6.3	-6	0.264575
fda_ligand_0708.pdbqt	ZINC000019632668	doxapram	-5.7	-6.3	-6	-6	0.3
fda_ligand_0709.pdbqt	ZINC000019632668	doxapram	-5.7	-6.3	-6	-6	0.3
fda_ligand_0917.pdbqt	ZINC000001530613	dicyclomine	-6	-6	-6	-6	0
fda_ligand_0930.pdbqt	ZINC000001530618	disopyramide	-5.7	-6.3	-6	-6	0.3
fda_ligand_0939.pdbqt	ZINC000000002273	orciprenaline	-6	-6	-6	-6	0
fda_ligand_1019.pdbqt	ZINC000000057532	mydriacyl	-6	-5.9	-6.1	-6	0.1
fda_ligand_1085.pdbqt	ZINC000000897002	ropivacaine	-6	-6	-6	-6	0
fda_ligand_1240.pdbqt	ZINC000003995809	faslodex	-5.6	-5.9	-6.5	-6	0.458258
fda_ligand_1254.pdbqt	ZINC000000000490	ZINC490	-6	-6	-6	-6	0
fda_ligand_1590.pdbqt	ZINC000008220878	ibutilide	-5.9	-5.9	-6.2	-6	0.173205
fda_ligand_1626.pdbqt	ZINC000001530654	hydroxychloroquine	-5.9	-6.1	-6	-6	0.1
fda_ligand_1628.pdbqt	ZINC000001530654	hydroxychloroquine	-5.9	-6	-6.1	-6	0.1
fda_ligand_1659.pdbqt	ZINC000000896709	methylphenidate	-6.1	-6	-5.9	-6	0.1
fda_ligand_1807.pdbqt	ZINC000000001982	probenecid	-5.9	-5.9	-6.2	-6	0.173205
fda_ligand_1841.pdbqt	ZINC000000154964	mepivacaine	-6	-6	-6	-6	0
fda_ligand_1952.pdbqt	ZINC000000057513	thonzylamine	-5.9	-5.9	-6.2	-6	0.173205
fda_ligand_1997.pdbqt	ZINC000008214418	ioxilan	-5.8	-6	-6.2	-6	0.2
fda_ligand_0448.pdbqt	ZINC000000000196	cyclopentolate	-5.9	-5.9	-6.1	-5.96667	0.11547
fda_ligand_0465.pdbqt	ZINC000001530694	tamsulosin	-6	-6.2	-5.7	-5.96667	0.251661
fda_ligand_0545.pdbqt	ZINC000001530728	rnd	-5.9	-5.9	-6.1	-5.96667	0.11547
fda_ligand_0606.pdbqt	ZINC000003830999	liothyronine	-5.8	-6	-6.1	-5.96667	0.152753
fda_ligand_0649.pdbqt	ZINC000000002176	timolol	-6.1	-5.8	-6	-5.96667	0.152753
fda_ligand_0662.pdbqt	ZINC000019362737	chlorcyclizine	-5.9	-6	-6	-5.96667	0.057735
fda_ligand_0663.pdbqt	ZINC000019362737	chlorcyclizine	-5.9	-6	-6	-5.96667	0.057735
fda_ligand_0697.pdbqt	ZINC000001530703	tolbutamide	-5.9	-6	-6	-5.96667	0.057735
fda_ligand_0802.pdbqt	ZINC000001530817	prilocaine	-5.9	-6	-6	-5.96667	0.057735
fda_ligand_1083.pdbqt	ZINC000000897002	ropivacaine	-6	-6	-5.9	-5.96667	0.057735
fda_ligand_1134.pdbqt	ZINC000001530689	tamoxifen	-5.9	-6	-6	-5.96667	0.057735
fda_ligand_1143.pdbqt	ZINC000001530570	bisoprolol	-6.1	-5.8	-6	-5.96667	0.152753
fda_ligand_1147.pdbqt	ZINC000000000850	zyflo	-5.9	-6.1	-5.9	-5.96667	0.11547
fda_ligand_1456.pdbqt	ZINC000000896523	esmolol	-5.8	-6.1	-6	-5.96667	0.152753
fda_ligand_1465.pdbqt	ZINC000003830993	thyroxine	-5.9	-6	-6	-5.96667	0.057735
fda_ligand_1602.pdbqt	ZINC000008214402	ibutilide	-6	-6.2	-5.7	-5.96667	0.251661
fda_ligand_1687.pdbqt	ZINC000003812888	verapamil	-5.9	-5.9	-6.1	-5.96667	0.11547
fda_ligand_1947.pdbqt	ZINC000000001931	phenyltoloxamine	-5.8	-6.2	-5.9	-5.96667	0.208167
fda_ligand_1974.pdbqt	ZINC000002016257	padimate o	-5.7	-6	-6.2	-5.96667	0.251661
fda_ligand_0128.pdbqt	ZINC000003944422	norvir	-6	-5.8	-6	-5.93333	0.11547
fda_ligand_0220.pdbqt	ZINC000000000061	baclofen	-5.9	-5.9	-6	-5.93333	0.057735
fda_ligand_0236.pdbqt	ZINC000001531008	gluconate	-5.9	-5.9	-6	-5.93333	0.057735
fda_ligand_0594.pdbqt	ZINC000013298313	allopurinol	-6	-5.9	-5.9	-5.93333	0.057735
fda_ligand_0595.pdbqt	ZINC000013298313	allopurinol	-6	-5.9	-5.9	-5.93333	0.057735
fda_ligand_0645.pdbqt	ZINC000000049154	pyridoxine	-5.9	-5.9	-6	-5.93333	0.057735
fda_ligand_0659.pdbqt	ZINC000019362735	chlorcyclizine	-5.8	-5.8	-6.2	-5.93333	0.23094
fda_ligand_0910.pdbqt	ZINC000002522648	methylphenidate	-6	-5.8	-6	-5.93333	0.11547
fda_ligand_0925.pdbqt	ZINC000001530812	bupivacaine	-6	-5.9	-5.9	-5.93333	0.057735
fda_ligand_0927.pdbqt	ZINC000001530812	bupivacaine	-6	-5.9	-5.9	-5.93333	0.057735
fda_ligand_1044.pdbqt	ZINC000000895081	citrate	-5.9	-5.9	-6	-5.93333	0.057735
fda_ligand_1047.pdbqt	ZINC000000002055	salicylamide	-6	-5.9	-5.9	-5.93333	0.057735
fda_ligand_1448.pdbqt	ZINC000012468792	xalatan	-6.1	-6	-5.7	-5.93333	0.208167
fda_ligand_1488.pdbqt	ZINC000000000494	metipranolol	-6	-5.9	-5.9	-5.93333	0.057735
fda_ligand_1507.pdbqt	ZINC000000601250	sulconazole	-5.8	-5.8	-6.2	-5.93333	0.23094
fda_ligand_1627.pdbqt	ZINC000001530654	hydroxychloroquine	-5.6	-6	-6.2	-5.93333	0.305505
fda_ligand_1638.pdbqt	ZINC000001530756	procainamide	-5.8	-6	-6	-5.93333	0.11547
fda_ligand_1793.pdbqt	ZINC000085540219	ioxilan	-5.7	-6.1	-6	-5.93333	0.208167
fda_ligand_0660.pdbqt	ZINC000019362735	chlorcyclizine	-5.8	-5.9	-6.1	-5.93333	0.152753
fda_ligand_0774.pdbqt	ZINC000019594599	ticlopidine	-5.8	-6.1	-5.9	-5.93333	0.152753
fda_ligand_1595.pdbqt	ZINC000000007601	salbutamol	-5.8	-5.9	-6.1	-5.93333	0.152753
fda_ligand_1604.pdbqt	ZINC000019144216	pyrilamine	-6.2	-6	-5.6	-5.93333	0.305505
fda_ligand_1954.pdbqt	ZINC000000121480	triclocarban	-6	-5.7	-6.1	-5.93333	0.208167
fda_ligand_0016.pdbqt	ZINC000004658290	mercaptopurine	-5.9	-5.9	-5.9	-5.9	0
fda_ligand_0021.pdbqt	ZINC000001633887	octinoxate	-5.7	-5.9	-6.1	-5.9	0.2
fda_ligand_0065.pdbqt	ZINC000001530737	ZINC1530737	-5.9	-5.9	-5.9	-5.9	0
fda_ligand_0246.pdbqt	ZINC000000001411	eugenol	-5.8	-6	-5.9	-5.9	0.1
fda_ligand_0339.pdbqt	ZINC000148723177	ZINC148723177	-5.9	-5.9	-5.9	-5.9	0
fda_ligand_0489.pdbqt	ZINC000001547851	etiracetam	-5.8	-6	-5.9	-5.9	0.1
fda_ligand_1142.pdbqt	ZINC000001530569	bisoprolol	-5.7	-5.9	-6.1	-5.9	0.2
fda_ligand_1197.pdbqt	ZINC000006661227	histidine	-5.8	-6	-5.9	-5.9	0.1
fda_ligand_1222.pdbqt	ZINC000000000456	mepivacaine	-5.8	-6	-5.9	-5.9	0.1
fda_ligand_1378.pdbqt	ZINC000100007011	lysteda	-5.9	-5.9	-5.9	-5.9	0
fda_ligand_1731.pdbqt	ZINC000003871832	verapamil	-6	-5.8	-5.9	-5.9	0.1
fda_ligand_1948.pdbqt	ZINC000000001931	phenyltoloxamine	-5.7	-6.1	-5.9	-5.9	0.2
fda_ligand_2050.pdbqt	ZINC000003799072	salmeterol	-6.1	-5.7	-5.9	-5.9	0.2
fda_ligand_0038.pdbqt	ZINC000001633889	octinoxate	-6.2	-5.7	-5.8	-5.9	0.264575
fda_ligand_0169.pdbqt	ZINC000003830958	iopromide	-5.7	-6	-6	-5.9	0.173205
fda_ligand_0845.pdbqt	ZINC000004393164	aliskiren	-5.9	-6	-5.8	-5.9	0.1
fda_ligand_0879.pdbqt	ZINC000002525885	desvenlafaxine	-5.8	-5.9	-6	-5.9	0.1
fda_ligand_0988.pdbqt	ZINC000000057206	bupropion	-5.8	-5.9	-6	-5.9	0.1
fda_ligand_1360.pdbqt	ZINC000000968336	tolterodine	-5.8	-5.9	-6	-5.9	0.1
fda_ligand_1464.pdbqt	ZINC000003830993	thyroxine	-5.8	-5.9	-6	-5.9	0.1
fda_ligand_1481.pdbqt	ZINC000000388462	phenylacetate	-5.8	-5.9	-6	-5.9	0.1
fda_ligand_1612.pdbqt	ZINC000000020230	salbutamol	-5.6	-6.1	-6	-5.9	0.264575
fda_ligand_0070.pdbqt	ZINC000003991624	vilanterol	-5.6	-5.9	-6.1	-5.86667	0.251661
fda_ligand_0315.pdbqt	ZINC000000009342	desvenlafaxine	-5.8	-5.9	-5.9	-5.86667	0.057735
fda_ligand_0327.pdbqt	ZINC000000020228	bupropion	-5.8	-5.9	-5.9	-5.86667	0.057735
fda_ligand_0447.pdbqt	ZINC000000001792	neostigmine	-5.3	-6.2	-6.1	-5.86667	0.493288
fda_ligand_0524.pdbqt	ZINC000000004413	rivastigmine	-5.9	-5.9	-5.8	-5.86667	0.057735
fda_ligand_0605.pdbqt	ZINC000003830999	liothyronine	-5.7	-5.9	-6	-5.86667	0.152753
fda_ligand_0644.pdbqt	ZINC000000000882	ade	-5.9	-5.9	-5.8	-5.86667	0.057735
fda_ligand_0661.pdbqt	ZINC000019362737	chlorcyclizine	-5.8	-6	-5.8	-5.86667	0.11547
fda_ligand_0721.pdbqt	ZINC000018099446	dtic	-5.9	-5.9	-5.8	-5.86667	0.057735
fda_ligand_0724.pdbqt	ZINC000018115268	cimetidine	-5.5	-6.1	-6	-5.86667	0.321455
fda_ligand_0821.pdbqt	ZINC000001533877	ibandronate	-5.8	-5.9	-5.9	-5.86667	0.057735
fda_ligand_0822.pdbqt	ZINC000001533877	ibandronate	-5.8	-6	-5.8	-5.86667	0.11547
fda_ligand_0923.pdbqt	ZINC000001530599	chlorporpamide	-5.9	-5.8	-5.9	-5.86667	0.057735
fda_ligand_1129.pdbqt	ZINC000007997897	naftin	-5.3	-6.4	-5.9	-5.86667	0.550757
fda_ligand_1272.pdbqt	ZINC000000056647	promethazine	-5.7	-5.9	-6	-5.86667	0.152753
fda_ligand_1412.pdbqt	ZINC000006827695	ZINC6827695	-5.8	-5.9	-5.9	-5.86667	0.057735
fda_ligand_1427.pdbqt	ZINC000000896698	effexor	-5.8	-5.9	-5.9	-5.86667	0.057735
fda_ligand_1504.pdbqt	ZINC000000044027	chlorpromazine	-5.8	-5.9	-5.9	-5.86667	0.057735
fda_ligand_1827.pdbqt	ZINC000022447798	gadoversetamide	-5.9	-5.9	-5.8	-5.86667	0.057735
fda_ligand_0291.pdbqt	ZINC000000000506	milnacipran	-5.8	-5.6	-6.2	-5.86667	0.305505
fda_ligand_0205.pdbqt	ZINC000001530981	terbinafine	-5.8	-5.7	-6	-5.83333	0.152753
fda_ligand_0544.pdbqt	ZINC000001530728	rnd	-5.8	-5.9	-5.8	-5.83333	0.057735
fda_ligand_0723.pdbqt	ZINC000018115268	cimetidine	-5.8	-5.8	-5.9	-5.83333	0.057735
fda_ligand_0807.pdbqt	ZINC000001530736	axid	-5.8	-5.9	-5.8	-5.83333	0.057735
fda_ligand_0875.pdbqt	ZINC000004640636	procasil	-5.8	-5.8	-5.9	-5.83333	0.057735
fda_ligand_0880.pdbqt	ZINC000002525885	desvenlafaxine	-5.8	-5.9	-5.8	-5.83333	0.057735
fda_ligand_0887.pdbqt	ZINC000001530725	lysodren	-5.7	-5.6	-6.2	-5.83333	0.321455
fda_ligand_0916.pdbqt	ZINC000001530613	dicyclomine	-5.7	-5.8	-6	-5.83333	0.152753
fda_ligand_1263.pdbqt	ZINC000004474603	epa	-5.5	-5.9	-6.1	-5.83333	0.305505
fda_ligand_1428.pdbqt	ZINC000000896698	effexor	-5.6	-5.5	-6.4	-5.83333	0.493288
fda_ligand_1584.pdbqt	ZINC000019156872	cyclizine	-5.7	-5.9	-5.9	-5.83333	0.11547
fda_ligand_1585.pdbqt	ZINC000019156872	cyclizine	-5.7	-5.9	-5.9	-5.83333	0.11547
fda_ligand_1586.pdbqt	ZINC000019156872	cyclizine	-5.7	-5.9	-5.9	-5.83333	0.11547
fda_ligand_1780.pdbqt	ZINC000000000257	esmolol	-6	-5.8	-5.7	-5.83333	0.152753
fda_ligand_1794.pdbqt	ZINC000085540223	ioxilan	-5.7	-5.9	-5.9	-5.83333	0.11547
fda_ligand_0425.pdbqt	ZINC000008101109	foscarnet	-5.7	-5.9	-5.8	-5.8	0.1
fda_ligand_0629.pdbqt	ZINC000003830959	iopromide	-5.9	-5.7	-5.8	-5.8	0.1
fda_ligand_0015.pdbqt	ZINC000004658290	mercaptopurine	-5.8	-5.7	-5.9	-5.8	0.1
fda_ligand_0084.pdbqt	ZINC000003830960	iopromide	-5.8	-5.8	-5.8	-5.8	0
fda_ligand_0153.pdbqt	ZINC000001530752	oxybutynin	-5.7	-6	-5.7	-5.8	0.173205
fda_ligand_0523.pdbqt	ZINC000000004413	rivastigmine	-5.8	-5.8	-5.8	-5.8	0
fda_ligand_0588.pdbqt	ZINC000000001958	esbriet	-5.5	-5.6	-6.3	-5.8	0.43589
fda_ligand_0612.pdbqt	ZINC000000968233	benzophenone	-5.7	-5.8	-5.9	-5.8	0.1
fda_ligand_0621.pdbqt	ZINC000001532526	glumin	-5.8	-5.8	-5.8	-5.8	0
fda_ligand_0685.pdbqt	ZINC000000000242	doxylamine	-5.5	-5.7	-6.2	-5.8	0.360555
fda_ligand_0897.pdbqt	ZINC000001530811	tetracaine	-5.1	-6.6	-5.7	-5.8	0.754983
fda_ligand_0976.pdbqt	ZINC000003812913	apl-202	-5.3	-6.1	-6	-5.8	0.43589
fda_ligand_1081.pdbqt	ZINC000000896711	focalin	-5.6	-5.9	-5.9	-5.8	0.173205
fda_ligand_1260.pdbqt	ZINC000001576892	oxana	-5.5	-6	-5.9	-5.8	0.264575
fda_ligand_1261.pdbqt	ZINC000002561203	butyl vanillyl ether	-5.9	-5.6	-5.9	-5.8	0.173205
fda_ligand_1577.pdbqt	ZINC000007997952	doxylamine	-5.6	-6.4	-5.4	-5.8	0.52915
fda_ligand_1591.pdbqt	ZINC000008220878	ibutilide	-5.4	-6	-6	-5.8	0.34641
fda_ligand_1613.pdbqt	ZINC000000020250	promethazine	-5.7	-5.8	-5.9	-5.8	0.1
fda_ligand_1865.pdbqt	ZINC000000967566	antiseptic	-5.7	-5.8	-5.9	-5.8	0.1
fda_ligand_2082.pdbqt	ZINC000013912394	afp-168	-5.7	-6	-5.7	-5.8	0.173205
fda_ligand_0026.pdbqt	ZINC000100009383	ZINC100009383	-5.5	-5.8	-6	-5.76667	0.251661
fda_ligand_0066.pdbqt	ZINC000001530737	ZINC1530737	-5.6	-5.9	-5.8	-5.76667	0.152753
fda_ligand_0067.pdbqt	ZINC000001690604	hydroxyamphetamine	-5.6	-5.9	-5.8	-5.76667	0.152753
fda_ligand_0200.pdbqt	ZINC000012404516	toremifene	-5.7	-5.8	-5.8	-5.76667	0.057735
fda_ligand_0289.pdbqt	ZINC000000002005	pza	-5.7	-5.7	-5.9	-5.76667	0.11547
fda_ligand_0298.pdbqt	ZINC000000596731	tikosyn	-6.2	-5.8	-5.3	-5.76667	0.450925
fda_ligand_0369.pdbqt	ZINC000018203737	edaravone	-5.7	-5.8	-5.8	-5.76667	0.057735
fda_ligand_0432.pdbqt	ZINC000003812862	pamidronate	-5.9	-5.7	-5.7	-5.76667	0.11547
fda_ligand_0576.pdbqt	ZINC000012503076	eurax	-5.6	-5.9	-5.8	-5.76667	0.152753
fda_ligand_0589.pdbqt	ZINC000000020783	tapentadol	-5.8	-5.8	-5.7	-5.76667	0.057735
fda_ligand_0677.pdbqt	ZINC000001530816	prilocaine	-5.7	-5.8	-5.8	-5.76667	0.057735
fda_ligand_0679.pdbqt	ZINC000036294079	ketamine	-5.8	-5.7	-5.8	-5.76667	0.057735
fda_ligand_0687.pdbqt	ZINC000000000565	orphenadrine	-5.2	-6.1	-6	-5.76667	0.493288
fda_ligand_0698.pdbqt	ZINC000001530703	tolbutamide	-5.7	-5.8	-5.8	-5.76667	0.057735
fda_ligand_0824.pdbqt	ZINC000001533877	ibandronate	-5.7	-5.9	-5.7	-5.76667	0.11547
fda_ligand_0947.pdbqt	ZINC000000000096	dexbrompheniramine	-5.7	-5.8	-5.8	-5.76667	0.057735
fda_ligand_1389.pdbqt	ZINC000003782550	kerastick	-5.8	-5.7	-5.8	-5.76667	0.057735
fda_ligand_1515.pdbqt	ZINC000006409735	clioquinol	-5.6	-5.9	-5.8	-5.76667	0.152753
fda_ligand_1543.pdbqt	ZINC000000020237	emla	-5.7	-5.8	-5.8	-5.76667	0.057735
fda_ligand_1544.pdbqt	ZINC000000020237	emla	-5.7	-5.9	-5.7	-5.76667	0.11547
fda_ligand_1603.pdbqt	ZINC000008214402	ibutilide	-5.3	-5.8	-6.2	-5.76667	0.450925
fda_ligand_1634.pdbqt	ZINC000001530940	dyclonine	-5.6	-5.7	-6	-5.76667	0.208167
fda_ligand_1732.pdbqt	ZINC000003871832	verapamil	-5.8	-5.7	-5.8	-5.76667	0.057735
fda_ligand_1792.pdbqt	ZINC000085540215	ioxilan	-5.6	-5.9	-5.8	-5.76667	0.152753
fda_ligand_1923.pdbqt	ZINC000100071256	ZINC100071256	-5.7	-5.8	-5.8	-5.76667	0.057735
fda_ligand_0823.pdbqt	ZINC000001533877	ibandronate	-5.8	-5.9	-5.6	-5.76667	0.152753
fda_ligand_0915.pdbqt	ZINC000001530572	myleran	-5.4	-6.3	-5.6	-5.76667	0.472582
fda_ligand_1110.pdbqt	ZINC000004102194	centany	-5.6	-6.1	-5.6	-5.76667	0.288675
fda_ligand_1400.pdbqt	ZINC000003830947	isovue-m	-5.6	-5.8	-5.9	-5.76667	0.152753
fda_ligand_1273.pdbqt	ZINC000000057253	chlophedianol	-5.7	-5.6	-5.9	-5.73333	0.152753
fda_ligand_1868.pdbqt	ZINC000019144231	chloroquine	-5.7	-5.6	-5.9	-5.73333	0.152753
fda_ligand_1975.pdbqt	ZINC000002016258	padimate o	-4.9	-6.2	-6.1	-5.73333	0.723418
fda_ligand_0012.pdbqt	ZINC000000896546	5-fc	-5.8	-5.7	-5.7	-5.73333	0.057735
fda_ligand_0013.pdbqt	ZINC000000896546	5-fc	-5.8	-5.7	-5.7	-5.73333	0.057735
fda_ligand_0380.pdbqt	ZINC000000010164	cevimeline	-5.6	-5.8	-5.8	-5.73333	0.11547
fda_ligand_0381.pdbqt	ZINC000000010164	cevimeline	-5.6	-5.8	-5.8	-5.73333	0.11547
fda_ligand_0522.pdbqt	ZINC000000004949	gabapentin	-5.8	-5.6	-5.8	-5.73333	0.11547
fda_ligand_0642.pdbqt	ZINC000022010382	phendimetrazine	-5.7	-5.7	-5.8	-5.73333	0.057735
fda_ligand_0680.pdbqt	ZINC000036294079	ketamine	-5.8	-5.6	-5.8	-5.73333	0.11547
fda_ligand_0776.pdbqt	ZINC000019594599	ticlopidine	-5.7	-5.8	-5.7	-5.73333	0.057735
fda_ligand_0820.pdbqt	ZINC000001533877	ibandronate	-5.7	-6	-5.5	-5.73333	0.251661
fda_ligand_1008.pdbqt	ZINC000003831138	apl-202	-5.9	-6	-5.3	-5.73333	0.378594
fda_ligand_1009.pdbqt	ZINC000003831430	rimantadine	-5.6	-5.8	-5.8	-5.73333	0.11547
fda_ligand_1073.pdbqt	ZINC000000057254	chlophedianol	-5.7	-5.7	-5.8	-5.73333	0.057735
fda_ligand_1159.pdbqt	ZINC000022016976	calteridol	-5.6	-5.8	-5.8	-5.73333	0.11547
fda_ligand_1164.pdbqt	ZINC000022016981	calteridol	-5.6	-5.9	-5.7	-5.73333	0.152753
fda_ligand_1165.pdbqt	ZINC000022059268	tetraxetan	-5.6	-5.8	-5.8	-5.73333	0.11547
fda_ligand_1593.pdbqt	ZINC000019144226	chloroquine	-5.5	-5.9	-5.8	-5.73333	0.208167
fda_ligand_1821.pdbqt	ZINC000003831429	rimantadine	-5.7	-5.7	-5.8	-5.73333	0.057735
fda_ligand_1838.pdbqt	ZINC000000155269	orphenadrine	-5.7	-5.8	-5.7	-5.73333	0.057735
fda_ligand_1869.pdbqt	ZINC000019144231	chloroquine	-5.8	-5.6	-5.8	-5.73333	0.11547
fda_ligand_2008.pdbqt	ZINC000000000271	ethotoin	-5.7	-5.8	-5.7	-5.73333	0.057735
fda_ligand_0368.pdbqt	ZINC000018203737	edaravone	-5.6	-5.5	-6	-5.7	0.264575
fda_ligand_1046.pdbqt	ZINC000000001554	acne	-5.7	-5.7	-5.7	-5.7	0
fda_ligand_1124.pdbqt	ZINC000000000122	carbinoxamine	-5.7	-5.7	-5.7	-5.7	0
fda_ligand_1181.pdbqt	ZINC000000005878	nam	-5.7	-5.6	-5.8	-5.7	0.1
fda_ligand_1255.pdbqt	ZINC000000001706	nikomet	-5.7	-5.7	-5.7	-5.7	0
fda_ligand_1455.pdbqt	ZINC000000896455	brompheniramine	-5.5	-5.8	-5.8	-5.7	0.173205
fda_ligand_1576.pdbqt	ZINC000007997952	doxylamine	-5.6	-5.4	-6.1	-5.7	0.360555
fda_ligand_1635.pdbqt	ZINC000001530940	dyclonine	-5.7	-6	-5.4	-5.7	0.3
fda_ligand_1774.pdbqt	ZINC000003875342	piperonyl butoxide	-5.9	-5.6	-5.6	-5.7	0.173205
fda_ligand_1906.pdbqt	ZINC000019875504	rasagiline	-5.7	-5.8	-5.6	-5.7	0.1
fda_ligand_1907.pdbqt	ZINC000019875504	rasagiline	-5.7	-5.8	-5.6	-5.7	0.1
fda_ligand_0775.pdbqt	ZINC000019594599	ticlopidine	-5.6	-5.8	-5.7	-5.7	0.1
fda_ligand_1162.pdbqt	ZINC000022016981	calteridol	-5.6	-5.8	-5.7	-5.7	0.1
fda_ligand_0007.pdbqt	ZINC000000008492	oxyquinoline	-5.5	-5.6	-5.9	-5.66667	0.208167
fda_ligand_0154.pdbqt	ZINC000001530752	oxybutynin	-5.6	-5.7	-5.7	-5.66667	0.057735
fda_ligand_0201.pdbqt	ZINC000012404516	toremifene	-5.6	-5.6	-5.8	-5.66667	0.11547
fda_ligand_0248.pdbqt	ZINC000001530575	capsaicin	-5.6	-5.6	-5.8	-5.66667	0.11547
fda_ligand_0426.pdbqt	ZINC000008101109	foscarnet	-5.3	-5.9	-5.8	-5.66667	0.321455
fda_ligand_0431.pdbqt	ZINC000003812862	pamidronate	-5.6	-5.7	-5.7	-5.66667	0.057735
fda_ligand_0615.pdbqt	ZINC000000895457	oxyproline	-5.7	-5.6	-5.7	-5.66667	0.057735
fda_ligand_0639.pdbqt	ZINC000022010379	phendimetrazine	-5.6	-5.7	-5.7	-5.66667	0.057735
fda_ligand_0640.pdbqt	ZINC000022010382	phendimetrazine	-5.6	-5.6	-5.8	-5.66667	0.11547
fda_ligand_0788.pdbqt	ZINC000001530710	tridione	-5.6	-5.7	-5.7	-5.66667	0.057735
fda_ligand_0819.pdbqt	ZINC000001533877	ibandronate	-5.8	-5.6	-5.6	-5.66667	0.11547
fda_ligand_0876.pdbqt	ZINC000004640636	procasil	-5.6	-5.7	-5.7	-5.66667	0.057735
fda_ligand_1123.pdbqt	ZINC000000000122	carbinoxamine	-5.7	-5.7	-5.6	-5.66667	0.057735
fda_ligand_1131.pdbqt	ZINC000007997897	naftin	-4.9	-6.5	-5.6	-5.66667	0.802081
fda_ligand_1345.pdbqt	ZINC000019363537	tetraethylenepentamine	-5.7	-5.7	-5.6	-5.66667	0.057735
fda_ligand_1473.pdbqt	ZINC000003079340	carnitor	-5.7	-5.6	-5.7	-5.66667	0.057735
fda_ligand_1557.pdbqt	ZINC000001554392	hexaminolevulinate	-5.5	-5.6	-5.9	-5.66667	0.208167
fda_ligand_1743.pdbqt	ZINC000003830957	iopromide	-5.6	-5.7	-5.7	-5.66667	0.057735
fda_ligand_1805.pdbqt	ZINC000000002043	rotoxamine	-5.4	-6	-5.6	-5.66667	0.305505
fda_ligand_1475.pdbqt	ZINC000003831332	k-ject	-5.4	-5.7	-5.8	-5.63333	0.208167
fda_ligand_0317.pdbqt	ZINC000003079342	carbachol	-5.6	-5.7	-5.6	-5.63333	0.057735
fda_ligand_0641.pdbqt	ZINC000022010382	phendimetrazine	-5.6	-5.6	-5.7	-5.63333	0.057735
fda_ligand_1130.pdbqt	ZINC000007997897	naftin	-5.3	-5.9	-5.7	-5.63333	0.305505
fda_ligand_1136.pdbqt	ZINC000000001798	nicotrol	-5.5	-5.7	-5.7	-5.63333	0.11547
fda_ligand_1138.pdbqt	ZINC000000001798	nicotrol	-5.5	-5.7	-5.7	-5.63333	0.11547
fda_ligand_1606.pdbqt	ZINC000000014037	milnacipran	-5.5	-5.7	-5.7	-5.63333	0.11547
fda_ligand_1636.pdbqt	ZINC000001530805	zarontin	-5.6	-5.6	-5.7	-5.63333	0.057735
fda_ligand_1804.pdbqt	ZINC000000002043	rotoxamine	-5.4	-5.4	-6.1	-5.63333	0.404145
fda_ligand_1820.pdbqt	ZINC000003830314	btc	-5.6	-5.6	-5.7	-5.63333	0.057735
fda_ligand_1912.pdbqt	ZINC000049933061	dronedarone	-5.8	-5.6	-5.5	-5.63333	0.152753
fda_ligand_0326.pdbqt	ZINC000000020228	bupropion	-5.4	-5.7	-5.7	-5.6	0.173205
fda_ligand_0525.pdbqt	ZINC000000010163	evoxac	-5.4	-5.7	-5.7	-5.6	0.173205
fda_ligand_0526.pdbqt	ZINC000000010163	evoxac	-5.4	-5.7	-5.7	-5.6	0.173205
fda_ligand_0808.pdbqt	ZINC000001530736	axid	-5.8	-5.8	-5.2	-5.6	0.34641
fda_ligand_0898.pdbqt	ZINC000001530811	tetracaine	-5.2	-5.9	-5.7	-5.6	0.360555
fda_ligand_1051.pdbqt	ZINC000000020244	diphenhydramine	-5.1	-5.9	-5.8	-5.6	0.43589
fda_ligand_1262.pdbqt	ZINC000004474564	cervonate	-5.3	-5.8	-5.7	-5.6	0.264575
fda_ligand_1516.pdbqt	ZINC000006409735	clioquinol	-5.7	-5.4	-5.7	-5.6	0.173205
fda_ligand_1698.pdbqt	ZINC000003785268	salmeterol	-6	-5.3	-5.5	-5.6	0.360555
fda_ligand_1767.pdbqt	ZINC000000001115	leukeran	-5.4	-5.7	-5.7	-5.6	0.173205
fda_ligand_1769.pdbqt	ZINC000000057062	mexiletine	-5.4	-5.7	-5.7	-5.6	0.173205
fda_ligand_1778.pdbqt	ZINC000000113404	teldrin	-5.4	-5.7	-5.7	-5.6	0.173205
fda_ligand_1781.pdbqt	ZINC000000113398	ibuprofen	-5.2	-5.8	-5.8	-5.6	0.34641
fda_ligand_1962.pdbqt	ZINC000001571009	benzethonium	-6	-5.8	-5	-5.6	0.52915
fda_ligand_2110.pdbqt	ZINC000022010387	phendimetrazine	-5.6	-5.5	-5.7	-5.6	0.1
fda_ligand_0235.pdbqt	ZINC000000901791	oxyproline	-5.6	-5.6	-5.6	-5.6	0
fda_ligand_0513.pdbqt	ZINC000012503156	ZINC12503156	-5.6	-5.6	-5.6	-5.6	0
fda_ligand_0940.pdbqt	ZINC000000002647	ibuprofen	-5.3	-5.6	-5.9	-5.6	0.3
fda_ligand_1057.pdbqt	ZINC000000391812	nicotine	-5.6	-5.6	-5.6	-5.6	0
fda_ligand_1071.pdbqt	ZINC000000057001	captopril	-5.5	-5.7	-5.6	-5.6	0.1
fda_ligand_1072.pdbqt	ZINC000000057254	chlophedianol	-5.2	-6	-5.6	-5.6	0.4
fda_ligand_1161.pdbqt	ZINC000022016976	calteridol	-5.5	-5.7	-5.6	-5.6	0.1
fda_ligand_0977.pdbqt	ZINC000000508068	pheniramine	-5.4	-5.7	-5.6	-5.56667	0.152753
fda_ligand_0277.pdbqt	ZINC000000001084	caffeine	-5.5	-5.7	-5.5	-5.56667	0.11547
fda_ligand_0783.pdbqt	ZINC000019594594	pramoxine	-5.2	-5.8	-5.7	-5.56667	0.321455
fda_ligand_1042.pdbqt	ZINC000001482113	ZINC1482113	-5.5	-5.6	-5.6	-5.56667	0.057735
fda_ligand_1188.pdbqt	ZINC000052971887	eflornithine	-5.6	-5.5	-5.6	-5.56667	0.057735
fda_ligand_1274.pdbqt	ZINC000000057253	chlophedianol	-5.5	-5.7	-5.5	-5.56667	0.11547
fda_ligand_1600.pdbqt	ZINC000008015016	medronic acid	-5.3	-5.9	-5.5	-5.56667	0.305505
fda_ligand_1656.pdbqt	ZINC000003830813	etidronate	-5.6	-5.6	-5.5	-5.56667	0.057735
fda_ligand_1658.pdbqt	ZINC000003830813	etidronate	-5.6	-5.6	-5.5	-5.56667	0.057735
fda_ligand_1959.pdbqt	ZINC000001530938	chloroprocaine	-5.6	-5.5	-5.6	-5.56667	0.057735
fda_ligand_2036.pdbqt	ZINC000022010375	phendimetrazine	-5.6	-5.5	-5.6	-5.56667	0.057735
fda_ligand_2086.pdbqt	ZINC000017285872	ZINC17285872	-5.5	-5.6	-5.6	-5.56667	0.057735
fda_ligand_2111.pdbqt	ZINC000022010387	phendimetrazine	-5.6	-5.5	-5.6	-5.56667	0.057735
fda_ligand_0187.pdbqt	ZINC000003843378	tecfidera	-5.7	-5.3	-5.6	-5.53333	0.208167
fda_ligand_0610.pdbqt	ZINC000000901736	oxyproline	-5.5	-5.6	-5.5	-5.53333	0.057735
fda_ligand_1592.pdbqt	ZINC000019144226	chloroquine	-5.6	-5.7	-5.3	-5.53333	0.208167
fda_ligand_1654.pdbqt	ZINC000043763856	mecamylamine	-5.5	-5.5	-5.6	-5.53333	0.057735
fda_ligand_1779.pdbqt	ZINC000000113410	teldrin	-5.3	-5.8	-5.5	-5.53333	0.251661
fda_ligand_1867.pdbqt	ZINC000000967521	ZINC967521	-5.5	-5.5	-5.6	-5.53333	0.057735
fda_ligand_2044.pdbqt	ZINC000038945666	ravicti	-5.1	-5.6	-5.9	-5.53333	0.404145
fda_ligand_1601.pdbqt	ZINC000008015016	medronic acid	-5.1	-5.8	-5.7	-5.53333	0.378594
fda_ligand_1806.pdbqt	ZINC000000000607	pheniramine	-5.1	-5.8	-5.7	-5.53333	0.378594
fda_ligand_0011.pdbqt	ZINC000000001673	melphalan	-5.5	-5.5	-5.5	-5.5	0
fda_ligand_0039.pdbqt	ZINC000003830635	dfo	-6	-5.4	-5.1	-5.5	0.458258
fda_ligand_0069.pdbqt	ZINC000003831551	tiopronin	-5.5	-5.5	-5.5	-5.5	0
fda_ligand_0099.pdbqt	ZINC000008214635	alli	-5.7	-5.3	-5.5	-5.5	0.2
fda_ligand_0251.pdbqt	ZINC000004095858	eprolin	-5.7	-5.6	-5.2	-5.5	0.264575
fda_ligand_0505.pdbqt	ZINC000000000373	hydroxyamphetamine	-5.3	-5.6	-5.6	-5.5	0.173205
fda_ligand_0506.pdbqt	ZINC000000155905	tiopronin	-5.4	-5.6	-5.5	-5.5	0.1
fda_ligand_1210.pdbqt	ZINC000053022902	eflornithine	-5.5	-5.5	-5.5	-5.5	0
fda_ligand_1211.pdbqt	ZINC000053022902	eflornithine	-5.5	-5.5	-5.5	-5.5	0
fda_ligand_1434.pdbqt	ZINC000000968256	amantadine	-5.5	-5.5	-5.5	-5.5	0
fda_ligand_1435.pdbqt	ZINC000000968305	benzphetamine	-5.5	-5.4	-5.6	-5.5	0.1
fda_ligand_1624.pdbqt	ZINC000001530806	zarontin	-5.5	-5.5	-5.5	-5.5	0
fda_ligand_1837.pdbqt	ZINC000000155269	orphenadrine	-5.3	-5.8	-5.4	-5.5	0.264575
fda_ligand_2034.pdbqt	ZINC000022010375	phendimetrazine	-5.4	-5.5	-5.6	-5.5	0.1
fda_ligand_2112.pdbqt	ZINC000022010387	phendimetrazine	-5.4	-5.4	-5.7	-5.5	0.173205
fda_ligand_0784.pdbqt	ZINC000019594594	pramoxine	-5.4	-5.4	-5.6	-5.46667	0.11547
fda_ligand_1055.pdbqt	ZINC000000391812	nicotine	-5.4	-5.5	-5.5	-5.46667	0.057735
fda_ligand_1056.pdbqt	ZINC000000391812	nicotine	-5.4	-5.5	-5.5	-5.46667	0.057735
fda_ligand_1344.pdbqt	ZINC000019363537	tetraethylenepentamine	-5.4	-5.5	-5.5	-5.46667	0.057735
fda_ligand_1397.pdbqt	ZINC000003872520	trecator	-5.5	-5.5	-5.4	-5.46667	0.057735
fda_ligand_1730.pdbqt	ZINC000000002009	pyridostigmine	-5.4	-5.5	-5.5	-5.46667	0.057735
fda_ligand_1946.pdbqt	ZINC000000001132	chloroxylenol	-5.5	-5.4	-5.5	-5.46667	0.057735
fda_ligand_2035.pdbqt	ZINC000022010375	phendimetrazine	-5.4	-5.4	-5.6	-5.46667	0.11547
fda_ligand_0037.pdbqt	ZINC000000967520	camphor	-5.4	-5.4	-5.5	-5.43333	0.057735
fda_ligand_0625.pdbqt	ZINC000003589203	acetadote	-5.5	-5.4	-5.4	-5.43333	0.057735
fda_ligand_0637.pdbqt	ZINC000022010379	phendimetrazine	-5.4	-5.4	-5.5	-5.43333	0.057735
fda_ligand_0707.pdbqt	ZINC000000020259	pseudoephedrine	-5.5	-5.3	-5.5	-5.43333	0.11547
fda_ligand_1511.pdbqt	ZINC000038212689	carac	-5.5	-5.4	-5.4	-5.43333	0.057735
fda_ligand_1562.pdbqt	ZINC000000001341	edrophonium	-5.3	-5.5	-5.5	-5.43333	0.11547
fda_ligand_1777.pdbqt	ZINC000003830387	bcnu	-5.4	-5.4	-5.5	-5.43333	0.057735
fda_ligand_2003.pdbqt	ZINC000038140873	mecamylamine	-5.4	-5.4	-5.5	-5.43333	0.057735
fda_ligand_0899.pdbqt	ZINC000001530641	lopid	-5.3	-5.5	-5.4	-5.4	0.1
fda_ligand_1657.pdbqt	ZINC000003830813	etidronate	-5.4	-5.4	-5.4	-5.4	0
fda_ligand_0245.pdbqt	ZINC000000001011	benzoate	-5.3	-5.4	-5.5	-5.4	0.1
fda_ligand_1189.pdbqt	ZINC000052971887	eflornithine	-5.2	-5.5	-5.5	-5.4	0.173205
fda_ligand_1531.pdbqt	ZINC000002847375	diethylpropion	-5.3	-5.4	-5.5	-5.4	0.1
fda_ligand_0457.pdbqt	ZINC000001482197	tranylcypromine	-5	-5.6	-5.5	-5.36667	0.321455
fda_ligand_0638.pdbqt	ZINC000022010379	phendimetrazine	-5.2	-5.5	-5.4	-5.36667	0.152753
fda_ligand_0688.pdbqt	ZINC000000000565	orphenadrine	-5.1	-5.5	-5.5	-5.36667	0.23094
fda_ligand_1050.pdbqt	ZINC000000020244	diphenhydramine	-5.1	-5.2	-5.8	-5.36667	0.378594
fda_ligand_1137.pdbqt	ZINC000000001798	nicotrol	-5.3	-5.5	-5.3	-5.36667	0.11547
fda_ligand_1563.pdbqt	ZINC000000001341	edrophonium	-5.3	-5.4	-5.4	-5.36667	0.057735
fda_ligand_1611.pdbqt	ZINC000000020257	mexiletine	-5.1	-5.4	-5.6	-5.36667	0.251661
fda_ligand_1879.pdbqt	ZINC000001542002	fingolimod	-5.5	-5.1	-5.5	-5.36667	0.23094
fda_ligand_2106.pdbqt	ZINC000095564694	naloxegol	-5	-5.4	-5.7	-5.36667	0.351188
fda_ligand_0193.pdbqt	ZINC000100061056	ZINC100061056	-5.3	-5.3	-5.4	-5.33333	0.057735
fda_ligand_0433.pdbqt	ZINC000000005152	pregabalin	-5.3	-5.3	-5.4	-5.33333	0.057735
fda_ligand_0488.pdbqt	ZINC000000896663	tranylcypromine	-5.3	-5.3	-5.4	-5.33333	0.057735
fda_ligand_0616.pdbqt	ZINC000001482164	ice	-5.2	-5.4	-5.4	-5.33333	0.11547
fda_ligand_1388.pdbqt	ZINC000003782550	kerastick	-5.4	-5.3	-5.3	-5.33333	0.057735
fda_ligand_1512.pdbqt	ZINC000038212689	carac	-5.3	-5.2	-5.5	-5.33333	0.152753
fda_ligand_1842.pdbqt	ZINC000000000215	diethylpropion	-5.2	-5.4	-5.4	-5.33333	0.11547
fda_ligand_1866.pdbqt	ZINC000000967597	thymol	-5.4	-5.2	-5.4	-5.33333	0.11547
fda_ligand_1843.pdbqt	ZINC000000000215	diethylpropion	-5.2	-5.4	-5.3	-5.3	0.1
fda_ligand_2104.pdbqt	ZINC000095564694	naloxegol	-5.4	-5.2	-5.3	-5.3	0.1
fda_ligand_0103.pdbqt	ZINC000019364219	ethambutol	-5.5	-5.5	-4.9	-5.3	0.34641
fda_ligand_0320.pdbqt	ZINC000000074836	ephedrine	-4.9	-5.5	-5.5	-5.3	0.34641
fda_ligand_1426.pdbqt	ZINC000000001795	niaspan	-5.3	-5.3	-5.3	-5.3	0
fda_ligand_1556.pdbqt	ZINC000001554392	hexaminolevulinate	-5.2	-5.2	-5.5	-5.3	0.173205
fda_ligand_0755.pdbqt	ZINC000000000083	ZINC83	-5.2	-5.3	-5.3	-5.26667	0.057735
fda_ligand_1022.pdbqt	ZINC000006021033	amphetamine	-5.1	-5.4	-5.3	-5.26667	0.152753
fda_ligand_1156.pdbqt	ZINC000000000905	hmm	-5.2	-5.4	-5.2	-5.26667	0.11547
fda_ligand_1436.pdbqt	ZINC000000968305	benzphetamine	-4.9	-5.6	-5.3	-5.26667	0.351188
fda_ligand_1532.pdbqt	ZINC000002847375	diethylpropion	-5	-5.4	-5.4	-5.26667	0.23094
fda_ligand_0237.pdbqt	ZINC000001532522	lysine	-5.1	-5.3	-5.3	-5.23333	0.11547
fda_ligand_1259.pdbqt	ZINC000000896409	triethanolamine	-5.1	-5.3	-5.3	-5.23333	0.11547
fda_ligand_1871.pdbqt	ZINC000000006226	ferriprox	-5.2	-5.2	-5.3	-5.23333	0.057735
fda_ligand_1970.pdbqt	ZINC000100299039	ZINC100299039	-5.3	-5.3	-5.1	-5.23333	0.11547
[truncated: 116 more rows]

## Sheet: Difference
LIGAND_NAME	ZINC_ID	Drug_name	4hww	4hxq	3sjt	Average	Standard_deviation	LIGAND_NAME	ZINC_ID	Drug_name	4hze	4i06	4ixu	Average	Standard_deviation	Total average	Total SD	DG difference average	MW(daltons)
fda_ligand_0001.pdbqt	ZINC000001530427	fosfomycin	-4.5	-4.5	-5.1	-4.7	0.34641	fda_ligand_0001.pdbqt	ZINC000001530427	fosfomycin	-4.6	-4.6	-4.7	-4.63333	0.057735	-4.66667	0.225093	0.0666667	138.059
fda_ligand_0002.pdbqt	ZINC000001530427	fosfomycin	-4.5	-4.5	-4.5	-4.5	0	fda_ligand_0002.pdbqt	ZINC000001530427	fosfomycin	-4.5	-4.5	-4.5	-4.5	0	-4.5	0	0	138.059
fda_ligand_0003.pdbqt	ZINC000001530427	fosfomycin	-4.5	-4.5	-4.5	-4.5	0	fda_ligand_0003.pdbqt	ZINC000001530427	fosfomycin	-4.5	-4.5	-4.5	-4.5	0	-4.5	0	0	138.059
fda_ligand_0004.pdbqt	ZINC000003807804	mycelex	-5.9	-5.7	-6.7	-6.1	0.52915	fda_ligand_0004.pdbqt	ZINC000003807804	mycelex	-6.3	-6.4	-6.9	-6.53333	0.321455	-6.31667	0.457894	-0.433333	344.845
fda_ligand_0005.pdbqt	ZINC000003807804	mycelex	-5.9	-5.6	-7.9	-6.46667	1.25033	fda_ligand_0005.pdbqt	ZINC000003807804	mycelex	-6.4	-6.3	-6.9	-6.53333	0.321455	-6.5	0.817313	-0.0666667	344.845
fda_ligand_0006.pdbqt	ZINC000000120286	triamteril	-7.5	-7.3	-7.5	-7.43333	0.11547	fda_ligand_0006.pdbqt	ZINC000000120286	triamteril	-7.2	-7.7	-7.3	-7.4	0.264575	-7.41667	0.183485	0.0333333	253.269
fda_ligand_0007.pdbqt	ZINC000000008492	oxyquinoline	-5.4	-5.5	-5.9	-5.6	0.264575	fda_ligand_0007.pdbqt	ZINC000000008492	oxyquinoline	-5.5	-5.6	-5.9	-5.66667	0.208167	-5.63333	0.216025	-0.0666667	145.161
fda_ligand_0008.pdbqt	ZINC000003607120	zymar	-6.4	-6.2	-6.4	-6.33333	0.11547	fda_ligand_0008.pdbqt	ZINC000003607120	zymar	-6.6	-7	-6.8	-6.8	0.2	-6.56667	0.294392	-0.466667	375.4
fda_ligand_0009.pdbqt	ZINC000003607120	zymar	-6.7	-6.3	-6.4	-6.46667	0.208167	fda_ligand_0009.pdbqt	ZINC000003607120	zymar	-7	-7.1	-7	-7.03333	0.057735	-6.75	0.339116	-0.566667	375.4
fda_ligand_0010.pdbqt	ZINC000001612996	irinotecan	-7.9	-8.5	-8.3	-8.23333	0.305505	fda_ligand_0010.pdbqt	ZINC000001612996	irinotecan	-8.2	-8.7	-8	-8.3	0.360555	-8.26667	0.301109	-0.0666667	586.689
fda_ligand_0011.pdbqt	ZINC000000001673	melphalan	-5.2	-5.2	-5.5	-5.3	0.173205	fda_ligand_0011.pdbqt	ZINC000000001673	melphalan	-5.5	-5.5	-5.5	-5.5	0	-5.4	0.154919	-0.2	305.205
fda_ligand_0012.pdbqt	ZINC000000896546	5-fc	-5.8	-5.7	-6	-5.83333	0.152753	fda_ligand_0012.pdbqt	ZINC000000896546	5-fc	-5.8	-5.7	-5.7	-5.73333	0.057735	-5.78333	0.116905	0.1	129.094
fda_ligand_0013.pdbqt	ZINC000000896546	5-fc	-5.8	-5.7	-6.1	-5.86667	0.208167	fda_ligand_0013.pdbqt	ZINC000000896546	5-fc	-5.8	-5.7	-5.7	-5.73333	0.057735	-5.8	0.154919	0.133333	129.094
fda_ligand_0014.pdbqt	ZINC000051133897	piroxicam	-6.9	-6.9	-8.1	-7.3	0.69282	fda_ligand_0014.pdbqt	ZINC000051133897	piroxicam	-7.3	-7.3	-7.4	-7.33333	0.057735	-7.31667	0.440076	-0.0333333	331.353
fda_ligand_0015.pdbqt	ZINC000004658290	mercaptopurine	-5.7	-5.9	-5.7	-5.76667	0.11547	fda_ligand_0015.pdbqt	ZINC000004658290	mercaptopurine	-5.8	-5.7	-5.9	-5.8	0.1	-5.78333	0.0983192	-0.0333333	152.182
fda_ligand_0016.pdbqt	ZINC000004658290	mercaptopurine	-5.7	-5.7	-5.7	-5.7	0	fda_ligand_0016.pdbqt	ZINC000004658290	mercaptopurine	-5.9	-5.9	-5.9	-5.9	0	-5.8	0.109545	-0.2	152.182
fda_ligand_0017.pdbqt	ZINC000001529323	methotrexate	-7.7	-7.8	-7.6	-7.7	0.1	fda_ligand_0017.pdbqt	ZINC000001529323	methotrexate	-8	-8.2	-8.1	-8.1	0.1	-7.9	0.236643	-0.4	454.447
fda_ligand_0018.pdbqt	ZINC000095616601	prazosin	-6.5	-6.5	-6.7	-6.56667	0.11547	fda_ligand_0018.pdbqt	ZINC000095616601	prazosin	-7.3	-7.2	-7.3	-7.26667	0.057735	-6.91667	0.392003	-0.7	383.408
fda_ligand_0019.pdbqt	ZINC000095616601	prazosin	-6.4	-6.3	-6.9	-6.53333	0.321455	fda_ligand_0019.pdbqt	ZINC000095616601	prazosin	-7.2	-7.1	-7.1	-7.13333	0.057735	-6.83333	0.388158	-0.6	383.408
fda_ligand_0020.pdbqt	ZINC000014961096	alogliptin	-6.6	-6.4	-7.1	-6.7	0.360555	fda_ligand_0020.pdbqt	ZINC000014961096	alogliptin	-7.2	-7.6	-7.6	-7.46667	0.23094	-7.08333	0.499667	-0.766667	339.399
fda_ligand_0021.pdbqt	ZINC000001633887	octinoxate	-5.4	-5.3	-5.8	-5.5	0.264575	fda_ligand_0021.pdbqt	ZINC000001633887	octinoxate	-5.7	-5.9	-6.1	-5.9	0.2	-5.7	0.303315	-0.4	290.403
fda_ligand_0022.pdbqt	ZINC000002005305	5-methyltetrahydrofolate	-7.4	-7.9	-7.6	-7.63333	0.251661	fda_ligand_0022.pdbqt	ZINC000002005305	5-methyltetrahydrofolate	-8.4	-8.4	-8.5	-8.43333	0.057735	-8.03333	0.467618	-0.8	459.463
fda_ligand_0023.pdbqt	ZINC000002005305	5-methyltetrahydrofolate	-7.9	-8.4	-8.2	-8.16667	0.251661	fda_ligand_0023.pdbqt	ZINC000002005305	5-methyltetrahydrofolate	-8.2	-8.8	-8.7	-8.56667	0.321455	-8.36667	0.338625	-0.4	459.463
fda_ligand_0024.pdbqt	ZINC000002005305	5-methyltetrahydrofolate	-7.9	-8.3	-8	-8.06667	0.208167	fda_ligand_0024.pdbqt	ZINC000002005305	5-methyltetrahydrofolate	-8.3	-8.7	-8.8	-8.6	0.264575	-8.33333	0.361478	-0.533333	459.463
fda_ligand_0025.pdbqt	ZINC000003861806	podofilox	-7.4	-7.9	-7.7	-7.66667	0.251661	fda_ligand_0025.pdbqt	ZINC000003861806	podofilox	-8.3	-8.7	-8.8	-8.6	0.264575	-8.13333	0.560952	-0.933333	414.41
fda_ligand_0026.pdbqt	ZINC000100009383	ZINC100009383	-5.4	-5.8	-5.7	-5.63333	0.208167	fda_ligand_0026.pdbqt	ZINC000100009383	ZINC100009383	-5.5	-5.8	-6	-5.76667	0.251661	-5.7	0.219089	-0.133333	180.156
fda_ligand_0027.pdbqt	ZINC000000018635	frovatriptan	-7.2	-7.3	-7.4	-7.3	0.1	fda_ligand_0027.pdbqt	ZINC000000018635	frovatriptan	-7.4	-7.4	-7.5	-7.43333	0.057735	-7.36667	0.10328	-0.133333	243.31
fda_ligand_0028.pdbqt	ZINC000002548959	ZINC2548959	-6.9	-6.8	-7.4	-7.03333	0.321455	fda_ligand_0028.pdbqt	ZINC000002548959	ZINC2548959	-7.1	-7	-7.1	-7.06667	0.057735	-7.05	0.207364	-0.0333333	216.192
fda_ligand_0029.pdbqt	ZINC000003831405	quinidine	-6.3	-6.4	-6.9	-6.53333	0.321455	fda_ligand_0029.pdbqt	ZINC000003831405	quinidine	-7.7	-7.6	-7.8	-7.7	0.1	-7.11667	0.673548	-1.16667	324.424
fda_ligand_0030.pdbqt	ZINC000003831405	quinidine	-6.3	-6.4	-6.9	-6.53333	0.321455	fda_ligand_0030.pdbqt	ZINC000003831405	quinidine	-7.7	-7.6	-7.7	-7.66667	0.057735	-7.1	0.654217	-1.13333	324.424
fda_ligand_0031.pdbqt	ZINC000003831404	quinine	-6.7	-6.9	-6.7	-6.76667	0.11547	fda_ligand_0031.pdbqt	ZINC000003831404	quinine	-6.8	-7	-7	-6.93333	0.11547	-6.85	0.13784	-0.166667	324.424
fda_ligand_0032.pdbqt	ZINC000003831404	quinine	-6.7	-6.9	-6.7	-6.76667	0.11547	fda_ligand_0032.pdbqt	ZINC000003831404	quinine	-6.8	-7	-7	-6.93333	0.11547	-6.85	0.13784	-0.166667	324.424
fda_ligand_0033.pdbqt	ZINC000000389747	naloxone	-7.3	-7.4	-8	-7.56667	0.378594	fda_ligand_0033.pdbqt	ZINC000000389747	naloxone	-7.5	-7.9	-7.8	-7.73333	0.208167	-7.65	0.288097	-0.166667	327.38
fda_ligand_0034.pdbqt	ZINC000000389747	naloxone	-6.7	-6.9	-7.3	-6.96667	0.305505	fda_ligand_0034.pdbqt	ZINC000000389747	naloxone	-7.4	-7.7	-7.3	-7.46667	0.208167	-7.21667	0.360093	-0.5	327.38
fda_ligand_0035.pdbqt	ZINC000000389747	naloxone	-6.9	-6.8	-7.6	-7.1	0.43589	fda_ligand_0035.pdbqt	ZINC000000389747	naloxone	-7.2	-7.6	-7.5	-7.43333	0.208167	-7.26667	0.355903	-0.333333	327.38
fda_ligand_0036.pdbqt	ZINC000085205448	ZINC85205448	-6.5	-6.5	-6.9	-6.63333	0.23094	fda_ligand_0036.pdbqt	ZINC000085205448	ZINC85205448	-6.7	-6.7	-6.7	-6.7	0	-6.66667	0.150555	-0.0666667	346.339
fda_ligand_0037.pdbqt	ZINC000000967520	camphor	-5.3	-5.3	-5.5	-5.36667	0.11547	fda_ligand_0037.pdbqt	ZINC000000967520	camphor	-5.4	-5.4	-5.5	-5.43333	0.057735	-5.4	0.0894427	-0.0666667	152.237
fda_ligand_0038.pdbqt	ZINC000001633889	octinoxate	-5.1	-5.3	-5.6	-5.33333	0.251661	fda_ligand_0038.pdbqt	ZINC000001633889	octinoxate	-6.2	-5.7	-5.8	-5.9	0.264575	-5.61667	0.386868	-0.566667	290.403
fda_ligand_0039.pdbqt	ZINC000003830635	dfo	-4.8	-5.3	-6.1	-5.4	0.655744	fda_ligand_0039.pdbqt	ZINC000003830635	dfo	-6	-5.4	-5.1	-5.5	0.458258	-5.45	0.50892	-0.1	560.693
fda_ligand_0040.pdbqt	ZINC000026011099	omacetaxine mepesuccinate	-6.7	-6.5	-6.7	-6.63333	0.11547	fda_ligand_0040.pdbqt	ZINC000026011099	omacetaxine mepesuccinate	-6.9	-7.8	-7.1	-7.26667	0.472582	-6.95	0.463681	-0.633333	545.629
fda_ligand_0041.pdbqt	ZINC000026011099	omacetaxine mepesuccinate	-7	-7	-8.1	-7.36667	0.635085	fda_ligand_0041.pdbqt	ZINC000026011099	omacetaxine mepesuccinate	-7	-7.3	-7.2	-7.16667	0.152753	-7.26667	0.427395	0.2	545.629
fda_ligand_0042.pdbqt	ZINC000000005560	ketoprofen	-6.4	-6.1	-7.1	-6.53333	0.51316	fda_ligand_0042.pdbqt	ZINC000000005560	ketoprofen	-6.8	-7	-6.9	-6.9	0.1	-6.71667	0.386868	-0.366667	254.285
fda_ligand_0043.pdbqt	ZINC000000005823	demadex	-6.3	-6.8	-8	-7.03333	0.873689	fda_ligand_0043.pdbqt	ZINC000000005823	demadex	-7	-7.7	-6.7	-7.13333	0.51316	-7.08333	0.643169	-0.1	348.428
fda_ligand_0044.pdbqt	ZINC000000005823	demadex	-6.4	-6.6	-8.5	-7.16667	1.15902	fda_ligand_0044.pdbqt	ZINC000000005823	demadex	-6.8	-6.8	-7	-6.86667	0.11547	-7.01667	0.754763	0.3	348.428
fda_ligand_0045.pdbqt	ZINC000000005823	demadex	-6.4	-6.7	-8.3	-7.13333	1.02144	fda_ligand_0045.pdbqt	ZINC000000005823	demadex	-7.1	-8.1	-7.2	-7.46667	0.550757	-7.3	0.756307	-0.333333	348.428
fda_ligand_0046.pdbqt	ZINC000000005823	demadex	-6.3	-6.6	-8	-6.96667	0.907377	fda_ligand_0046.pdbqt	ZINC000000005823	demadex	-7	-7.2	-7.2	-7.13333	0.11547	-7.05	0.585662	-0.166667	348.428
fda_ligand_0047.pdbqt	ZINC000000005895	rizatriptan	-5.9	-5.8	-6.5	-6.06667	0.378594	fda_ligand_0047.pdbqt	ZINC000000005895	rizatriptan	-6.6	-6.9	-6.5	-6.66667	0.208167	-6.36667	0.427395	-0.6	269.352
fda_ligand_0048.pdbqt	ZINC000000006016	effexor	-5.4	-6	-6.3	-5.9	0.458258	fda_ligand_0048.pdbqt	ZINC000000006016	effexor	-6.4	-6	-6.3	-6.23333	0.208167	-6.06667	0.36697	-0.333333	277.408
fda_ligand_0049.pdbqt	ZINC000000006016	effexor	-5.8	-6	-6.3	-6.03333	0.251661	fda_ligand_0049.pdbqt	ZINC000000006016	effexor	-6.4	-6.1	-6.3	-6.26667	0.152753	-6.15	0.225832	-0.233333	277.408
fda_ligand_0050.pdbqt	ZINC000000602128	bepotastine	-6.4	-6.2	-7.1	-6.56667	0.472582	fda_ligand_0050.pdbqt	ZINC000000602128	bepotastine	-6.7	-6.8	-6.7	-6.73333	0.057735	-6.65	0.314643	-0.166667	388.895
fda_ligand_0051.pdbqt	ZINC000000607939	isradipin	-7.5	-7	-7.5	-7.33333	0.288675	fda_ligand_0051.pdbqt	ZINC000000607939	isradipin	-7.4	-7.2	-6.9	-7.16667	0.251661	-7.25	0.258844	0.166667	371.393
fda_ligand_0052.pdbqt	ZINC000000608382	flavoxate	-5.9	-6.1	-7	-6.33333	0.585947	fda_ligand_0052.pdbqt	ZINC000000608382	flavoxate	-6.6	-7.2	-7.3	-7.03333	0.378594	-6.68333	0.584523	-0.7	391.467
fda_ligand_0053.pdbqt	ZINC000000608382	flavoxate	-6.1	-6.1	-6	-6.06667	0.057735	fda_ligand_0053.pdbqt	ZINC000000608382	flavoxate	-6.6	-7	-7.3	-6.96667	0.351188	-6.51667	0.54191	-0.9	391.467
fda_ligand_0054.pdbqt	ZINC000002568036	dantrolene	-6.5	-6.5	-6.8	-6.6	0.173205	fda_ligand_0054.pdbqt	ZINC000002568036	dantrolene	-6.9	-7	-7	-6.96667	0.057735	-6.78333	0.231661	-0.366667	314.257
fda_ligand_0055.pdbqt	ZINC000002568036	dantrolene	-6.5	-6.5	-6.6	-6.53333	0.057735	fda_ligand_0055.pdbqt	ZINC000002568036	dantrolene	-7	-7	-7	-7	0	-6.76667	0.258199	-0.466667	314.257
fda_ligand_0056.pdbqt	ZINC000002570817	bromfenac	-7	-6.8	-7.1	-6.96667	0.152753	fda_ligand_0056.pdbqt	ZINC000002570817	bromfenac	-6.5	-7	-6.7	-6.73333	0.251661	-6.85	0.225832	0.233333	334.169
fda_ligand_0057.pdbqt	ZINC000002599970	formoterol	-5.6	-6.7	-6.3	-6.2	0.556776	fda_ligand_0057.pdbqt	ZINC000002599970	formoterol	-6.7	-6.8	-7	-6.83333	0.152753	-6.51667	0.503653	-0.633333	344.411
fda_ligand_0058.pdbqt	ZINC000002599970	formoterol	-6.5	-6.4	-6.4	-6.43333	0.057735	fda_ligand_0058.pdbqt	ZINC000002599970	formoterol	-6.9	-5.9	-6.5	-6.43333	0.503322	-6.43333	0.320416	0	344.411
fda_ligand_0059.pdbqt	ZINC000003956788	alinia	-6.7	-6.7	-6.7	-6.7	0	fda_ligand_0059.pdbqt	ZINC000003956788	alinia	-7.5	-7.7	-7.7	-7.63333	0.11547	-7.16667	0.516398	-0.933333	307.287
fda_ligand_0060.pdbqt	ZINC000100003902	maraviroc	-7.3	-7.4	-7.4	-7.36667	0.057735	fda_ligand_0060.pdbqt	ZINC000100003902	maraviroc	-7.8	-8.5	-7.8	-8.03333	0.404145	-7.7	0.447214	-0.666667	513.677
fda_ligand_0061.pdbqt	ZINC000100003902	maraviroc	-7.3	-7.3	-7.2	-7.26667	0.057735	fda_ligand_0061.pdbqt	ZINC000100003902	maraviroc	-7.3	-7.6	-7.5	-7.46667	0.152753	-7.36667	0.150555	-0.2	513.677
fda_ligand_0062.pdbqt	ZINC000000025958	rucaparib	-7.1	-7	-7.2	-7.1	0.1	fda_ligand_0062.pdbqt	ZINC000000025958	rucaparib	-7.1	-6.8	-7.1	-7	0.173205	-7.05	0.13784	0.1	323.371
fda_ligand_0063.pdbqt	ZINC000000607986	ZINC607986	-6.8	-7.3	-7.8	-7.3	0.5	fda_ligand_0063.pdbqt	ZINC000000607986	ZINC607986	-7.3	-7	-7.4	-7.23333	0.208167	-7.26667	0.34448	0.0666667	405.441
fda_ligand_0064.pdbqt	ZINC000000607986	ZINC607986	-5.9	-6.1	-6.7	-6.23333	0.416333	fda_ligand_0064.pdbqt	ZINC000000607986	ZINC607986	-7.1	-7.2	-7.1	-7.13333	0.057735	-6.68333	0.56006	-0.9	405.441
fda_ligand_0065.pdbqt	ZINC000001530737	ZINC1530737	-5.2	-5.5	-5.6	-5.43333	0.208167	fda_ligand_0065.pdbqt	ZINC000001530737	ZINC1530737	-5.9	-5.9	-5.9	-5.9	0	-5.66667	0.287518	-0.466667	331.467
fda_ligand_0066.pdbqt	ZINC000001530737	ZINC1530737	-5.5	-5.5	-5.5	-5.5	0	fda_ligand_0066.pdbqt	ZINC000001530737	ZINC1530737	-5.6	-5.9	-5.8	-5.76667	0.152753	-5.63333	0.175119	-0.266667	331.467
fda_ligand_0067.pdbqt	ZINC000001690604	hydroxyamphetamine	-5	-5.5	-5.7	-5.4	0.360555	fda_ligand_0067.pdbqt	ZINC000001690604	hydroxyamphetamine	-5.6	-5.9	-5.8	-5.76667	0.152753	-5.58333	0.318852	-0.366667	151.209
fda_ligand_0068.pdbqt	ZINC000003816287	axitinib	-7.7	-7.9	-7.7	-7.76667	0.11547	fda_ligand_0068.pdbqt	ZINC000003816287	axitinib	-7.3	-7.7	-7.6	-7.53333	0.208167	-7.65	0.197484	0.233333	386.48
fda_ligand_0069.pdbqt	ZINC000003831551	tiopronin	-5.4	-5.3	-5.3	-5.33333	0.057735	fda_ligand_0069.pdbqt	ZINC000003831551	tiopronin	-5.5	-5.5	-5.5	-5.5	0	-5.41667	0.0983192	-0.166667	163.198
fda_ligand_0070.pdbqt	ZINC000003991624	vilanterol	-6	-5.9	-6.2	-6.03333	0.152753	fda_ligand_0070.pdbqt	ZINC000003991624	vilanterol	-5.6	-5.9	-6.1	-5.86667	0.251661	-5.95	0.207364	0.166667	486.436
fda_ligand_0071.pdbqt	ZINC000004216238	ZINC4216238	-6.8	-6.8	-7.8	-7.13333	0.57735	fda_ligand_0071.pdbqt	ZINC000004216238	ZINC4216238	-7.4	-7.5	-7.6	-7.5	0.1	-7.31667	0.421505	-0.366667	285.235
fda_ligand_0072.pdbqt	ZINC000008466459	levmetamfetamine	-5	-5.1	-5.3	-5.13333	0.152753	fda_ligand_0072.pdbqt	ZINC000008466459	levmetamfetamine	-5.2	-5.1	-5.3	-5.2	0.1	-5.16667	0.121106	-0.0666667	149.237
fda_ligand_0073.pdbqt	ZINC000014881137	didecyl-dimethyl-ammonium	-3.9	-3.6	-3.4	-3.63333	0.251661	fda_ligand_0073.pdbqt	ZINC000014881137	didecyl-dimethyl-ammonium	-3.9	-4.1	-4.2	-4.06667	0.152753	-3.85	0.301662	-0.433333	326.633
fda_ligand_0074.pdbqt	ZINC000034089131	ZINC34089131	-7.6	-6.9	-6.9	-7.13333	0.404145	fda_ligand_0074.pdbqt	ZINC000034089131	ZINC34089131	-7.2	-7.5	-7.5	-7.4	0.173205	-7.26667	0.314113	-0.266667	433.592
fda_ligand_0075.pdbqt	ZINC000053084692	safinamide	-6.1	-5.9	-6.4	-6.13333	0.251661	fda_ligand_0075.pdbqt	ZINC000053084692	safinamide	-6.7	-6.9	-6.8	-6.8	0.1	-6.46667	0.40332	-0.666667	302.349
fda_ligand_0076.pdbqt	ZINC000053084692	safinamide	-6.1	-6.4	-6.3	-6.26667	0.152753	fda_ligand_0076.pdbqt	ZINC000053084692	safinamide	-6.6	-7.2	-6.9	-6.9	0.3	-6.58333	0.407022	-0.633333	302.349
fda_ligand_0077.pdbqt	ZINC000100070954	ZINC100070954	-6.8	-6.7	-7.2	-6.9	0.264575	fda_ligand_0077.pdbqt	ZINC000100070954	ZINC100070954	-7.8	-7.8	-7.9	-7.83333	0.057735	-7.36667	0.539135	-0.933333	490.626
fda_ligand_0078.pdbqt	ZINC000100014475	orfadin	-7.1	-7	-7.6	-7.23333	0.321455	fda_ligand_0078.pdbqt	ZINC000100014475	orfadin	-7.9	-8.1	-8.1	-8.03333	0.11547	-7.63333	0.488535	-0.8	329.23
fda_ligand_0079.pdbqt	ZINC000000002299	ZINC2299	-6.5	-6.3	-6.6	-6.46667	0.152753	fda_ligand_0079.pdbqt	ZINC000000002299	ZINC2299	-7	-7.1	-7.1	-7.06667	0.057735	-6.76667	0.34448	-0.6	285.774
fda_ligand_0080.pdbqt	ZINC000000002299	ZINC2299	-6.3	-6.1	-6.9	-6.43333	0.416333	fda_ligand_0080.pdbqt	ZINC000000002299	ZINC2299	-6.9	-6.9	-7	-6.93333	0.057735	-6.68333	0.381663	-0.5	285.774
fda_ligand_0081.pdbqt	ZINC000000002299	ZINC2299	-6.2	-6.1	-6.5	-6.26667	0.208167	fda_ligand_0081.pdbqt	ZINC000000002299	ZINC2299	-6.4	-7.1	-6.9	-6.8	0.360555	-6.53333	0.393277	-0.533333	285.774
fda_ligand_0082.pdbqt	ZINC000000896666	tranylcypromine	-4.6	-4.6	-5	-4.73333	0.23094	fda_ligand_0082.pdbqt	ZINC000000896666	tranylcypromine	-4.7	-4.7	-4.8	-4.73333	0.057735	-4.73333	0.150555	0	133.194
fda_ligand_0083.pdbqt	ZINC000001554010	gabapentin	-5.6	-6.2	-6.4	-6.06667	0.416333	fda_ligand_0083.pdbqt	ZINC000001554010	gabapentin	-6.8	-6.9	-7	-6.9	0.1	-6.48333	0.530723	-0.833333	329.393
fda_ligand_0084.pdbqt	ZINC000003830960	iopromide	-4.9	-4.8	-5.8	-5.16667	0.550757	fda_ligand_0084.pdbqt	ZINC000003830960	iopromide	-5.8	-5.8	-5.8	-5.8	0	-5.48333	0.491596	-0.633333	791.115
fda_ligand_0085.pdbqt	ZINC000004212809	deflazacort	-8.5	-8.8	-8.7	-8.66667	0.152753	fda_ligand_0085.pdbqt	ZINC000004212809	deflazacort	-8.5	-8.9	-8.8	-8.73333	0.208167	-8.7	0.167332	-0.0666667	441.524
fda_ligand_0086.pdbqt	ZINC000004658603	aha	-5	-5	-4.6	-4.86667	0.23094	fda_ligand_0086.pdbqt	ZINC000004658603	aha	-5.1	-5.1	-5.1	-5.1	0	-4.98333	0.194079	-0.233333	75.067
fda_ligand_0087.pdbqt	ZINC000004658603	aha	-4.6	-4.5	-4.2	-4.43333	0.208167	fda_ligand_0087.pdbqt	ZINC000004658603	aha	-4.5	-4.6	-4.6	-4.56667	0.057735	-4.5	0.154919	-0.133333	75.067
fda_ligand_0088.pdbqt	ZINC000008101127	indocyanine green	-7	-7.3	-7.5	-7.26667	0.251661	fda_ligand_0088.pdbqt	ZINC000008101127	indocyanine green	-7.7	-8.4	-7.8	-7.96667	0.378594	-7.61667	0.479236	-0.7	754.007
fda_ligand_0089.pdbqt	ZINC000013587680	iloprost	-6.6	-6.6	-6.6	-6.6	0	fda_ligand_0089.pdbqt	ZINC000013587680	iloprost	-6.8	-6.8	-6.8	-6.8	0	-6.7	0.109545	-0.2	360.494
fda_ligand_0090.pdbqt	ZINC000028108825	gadofosveset	-6.6	-6.5	-7.2	-6.76667	0.378594	fda_ligand_0090.pdbqt	ZINC000028108825	gadofosveset	-7.1	-8	-7.8	-7.63333	0.472582	-7.2	0.609918	-0.866667	737.696
fda_ligand_0091.pdbqt	ZINC000028108825	gadofosveset	-6.8	-6.5	-7.2	-6.83333	0.351188	fda_ligand_0091.pdbqt	ZINC000028108825	gadofosveset	-7.8	-7.5	-7.4	-7.56667	0.208167	-7.2	0.477493	-0.733333	737.696
fda_ligand_0092.pdbqt	ZINC000028108825	gadofosveset	-6.8	-6.8	-7.4	-7	0.34641	fda_ligand_0092.pdbqt	ZINC000028108825	gadofosveset	-7.6	-7.5	-7.6	-7.56667	0.057735	-7.28333	0.381663	-0.566667	737.696
fda_ligand_0093.pdbqt	ZINC000100013500	ZINC100013500	-6.5	-6.2	-6.3	-6.33333	0.152753	fda_ligand_0093.pdbqt	ZINC000100013500	ZINC100013500	-7.2	-7.2	-7.3	-7.23333	0.057735	-6.78333	0.503653	-0.9	517.776
fda_ligand_0094.pdbqt	ZINC000100013500	ZINC100013500	-6.4	-6.1	-6.2	-6.23333	0.152753	fda_ligand_0094.pdbqt	ZINC000100013500	ZINC100013500	-7.3	-7.3	-7.4	-7.33333	0.057735	-6.78333	0.611283	-1.1	517.776
fda_ligand_0095.pdbqt	ZINC000003833846	nelfinavir	-6.5	-6.7	-7.1	-6.76667	0.305505	fda_ligand_0095.pdbqt	ZINC000003833846	nelfinavir	-7.9	-7.3	-7.4	-7.53333	0.321455	-7.15	0.504975	-0.766667	567.796
fda_ligand_0096.pdbqt	ZINC000003833846	nelfinavir	-6.8	-6.9	-6.6	-6.76667	0.152753	fda_ligand_0096.pdbqt	ZINC000003833846	nelfinavir	-7.4	-7.2	-7.2	-7.26667	0.11547	-7.01667	0.299444	-0.5	567.796
fda_ligand_0097.pdbqt	ZINC000003833846	nelfinavir	-6.5	-6.8	-6.7	-6.66667	0.152753	fda_ligand_0097.pdbqt	ZINC000003833846	nelfinavir	-7.9	-7.4	-7.9	-7.73333	0.288675	-7.2	0.619677	-1.06667	567.796
fda_ligand_0098.pdbqt	ZINC000003927200	yaz	-8.1	-8.2	-7.8	-8.03333	0.208167	fda_ligand_0098.pdbqt	ZINC000003927200	yaz	-8.3	-8.1	-8.5	-8.3	0.2	-8.16667	0.233809	-0.266667	366.501
fda_ligand_0099.pdbqt	ZINC000008214635	alli	-4.8	-5.3	-4.9	-5	0.264575	fda_ligand_0099.pdbqt	ZINC000008214635	alli	-5.7	-5.3	-5.5	-5.5	0.2	-5.25	0.344964	-0.5	495.745
fda_ligand_0100.pdbqt	ZINC000012360535	hydralazine	-6.2	-6.4	-6.8	-6.46667	0.305505	fda_ligand_0100.pdbqt	ZINC000012360535	hydralazine	-6.4	-6.3	-6.4	-6.36667	0.057735	-6.41667	0.204124	0.1	160.18
fda_ligand_0101.pdbqt	ZINC000012360535	hydralazine	-6.3	-6.4	-6.4	-6.36667	0.057735	fda_ligand_0101.pdbqt	ZINC000012360535	hydralazine	-6.6	-6.7	-6.5	-6.6	0.1	-6.48333	0.147196	-0.233333	160.18
fda_ligand_0102.pdbqt	ZINC000012360535	hydralazine	-6.6	-6.6	-7	-6.73333	0.23094	fda_ligand_0102.pdbqt	ZINC000012360535	hydralazine	-6.8	-6.7	-6.9	-6.8	0.1	-6.76667	0.163299	-0.0666667	160.18
fda_ligand_0103.pdbqt	ZINC000019364219	ethambutol	-4.2	-5.1	-5.4	-4.9	0.6245	fda_ligand_0103.pdbqt	ZINC000019364219	ethambutol	-5.5	-5.5	-4.9	-5.3	0.34641	-5.1	0.501996	-0.4	204.314
fda_ligand_0104.pdbqt	ZINC000019364219	ethambutol	-4.4	-5.1	-5.4	-4.96667	0.51316	fda_ligand_0104.pdbqt	ZINC000019364219	ethambutol	-4.5	-4.8	-5.4	-4.9	0.458258	-4.93333	0.436654	0.0666667	204.314
fda_ligand_0105.pdbqt	ZINC000003813010	fluorodeoxyuridine	-6.3	-6.5	-7.5	-6.76667	0.64291	fda_ligand_0105.pdbqt	ZINC000003813010	fluorodeoxyuridine	-6.6	-6.9	-6.6	-6.7	0.173205	-6.73333	0.42269	0.0666667	246.194
fda_ligand_0106.pdbqt	ZINC000003813010	fluorodeoxyuridine	-6.5	-6.8	-7.6	-6.96667	0.568624	fda_ligand_0106.pdbqt	ZINC000003813010	fluorodeoxyuridine	-7.1	-7.3	-6.9	-7.1	0.2	-7.03333	0.388158	-0.133333	246.194
fda_ligand_0107.pdbqt	ZINC000003806063	rapaflo	-6.1	-5.4	-6.7	-6.06667	0.650641	fda_ligand_0107.pdbqt	ZINC000003806063	rapaflo	-6.6	-7.1	-6.7	-6.8	0.264575	-6.43333	0.598888	-0.733333	495.542
fda_ligand_0108.pdbqt	ZINC000000004448	zofran	-6.9	-7.1	-6.6	-6.86667	0.251661	fda_ligand_0108.pdbqt	ZINC000000004448	zofran	-7.2	-7.5	-7.4	-7.36667	0.152753	-7.11667	0.33116	-0.5	293.37
fda_ligand_0109.pdbqt	ZINC000000004448	zofran	-6.8	-6.9	-6.6	-6.76667	0.152753	fda_ligand_0109.pdbqt	ZINC000000004448	zofran	-7.5	-7.4	-7.7	-7.53333	0.152753	-7.15	0.441588	-0.766667	293.37
fda_ligand_0110.pdbqt	ZINC000009212654	retin-a	-6	-5.8	-6.3	-6.03333	0.251661	fda_ligand_0110.pdbqt	ZINC000009212654	retin-a	-7	-6.7	-6.7	-6.8	0.173205	-6.41667	0.462241	-0.766667	300.442
fda_ligand_0111.pdbqt	ZINC000000538564	casodex	-6.8	-6.7	-6.6	-6.7	0.1	fda_ligand_0111.pdbqt	ZINC000000538564	casodex	-7.3	-7.4	-7.4	-7.36667	0.057735	-7.03333	0.37238	-0.666667	430.379
fda_ligand_0112.pdbqt	ZINC000019632718	nimotop	-7.1	-7.2	-6.5	-6.93333	0.378594	fda_ligand_0112.pdbqt	ZINC000019632718	nimotop	-6.9	-6.9	-6.9	-6.9	0	-6.91667	0.240139	0.0333333	418.446
fda_ligand_0113.pdbqt	ZINC000000897251	donepezil	-6.7	-6.9	-6.6	-6.73333	0.152753	fda_ligand_0113.pdbqt	ZINC000000897251	donepezil	-7.1	-7.1	-7.3	-7.16667	0.11547	-6.95	0.266458	-0.433333	379.5
fda_ligand_0114.pdbqt	ZINC000000897251	donepezil	-6.7	-6.8	-6.6	-6.7	0.1	fda_ligand_0114.pdbqt	ZINC000000897251	donepezil	-7.1	-7.1	-7.2	-7.13333	0.057735	-6.91667	0.248328	-0.433333	379.5
fda_ligand_0115.pdbqt	ZINC000000968326	pioglitazone	-6.6	-6.4	-6.3	-6.43333	0.152753	fda_ligand_0115.pdbqt	ZINC000000968326	pioglitazone	-6.6	-6.4	-7.3	-6.76667	0.472582	-6.6	0.363318	-0.333333	356.447
fda_ligand_0116.pdbqt	ZINC000000968326	pioglitazone	-6.4	-6.4	-6.6	-6.46667	0.11547	fda_ligand_0116.pdbqt	ZINC000000968326	pioglitazone	-6.6	-6.7	-6.4	-6.56667	0.152753	-6.51667	0.132916	-0.1	356.447
fda_ligand_0117.pdbqt	ZINC000000968345	butabarbital	-6.5	-6.7	-6.7	-6.63333	0.11547	fda_ligand_0117.pdbqt	ZINC000000968345	butabarbital	-6.5	-6.7	-6.7	-6.63333	0.11547	-6.63333	0.10328	0	212.249
fda_ligand_0118.pdbqt	ZINC000000968345	butabarbital	-6.5	-6.7	-6.7	-6.63333	0.11547	fda_ligand_0118.pdbqt	ZINC000000968345	butabarbital	-6.5	-6.7	-6.7	-6.63333	0.11547	-6.63333	0.10328	0	212.249
fda_ligand_0119.pdbqt	ZINC000001554588	acamprosate	-6	-6	-5.8	-5.93333	0.11547	fda_ligand_0119.pdbqt	ZINC000001554588	acamprosate	-6	-6.2	-5.9	-6.03333	0.152753	-5.98333	0.132916	-0.1	181.213
fda_ligand_0120.pdbqt	ZINC000003830569	clavulanate	-6.7	-6.7	-7.2	-6.86667	0.288675	fda_ligand_0120.pdbqt	ZINC000003830569	clavulanate	-6.8	-7.2	-7.2	-7.06667	0.23094	-6.96667	0.258199	-0.2	199.162
fda_ligand_0121.pdbqt	ZINC000000592419	daxas	-6.6	-6.8	-6.8	-6.73333	0.11547	fda_ligand_0121.pdbqt	ZINC000000592419	daxas	-7.4	-7.8	-7.7	-7.63333	0.208167	-7.18333	0.515429	-0.9	403.212
fda_ligand_0122.pdbqt	ZINC000021297660	cellcept	-5.9	-6.2	-6.5	-6.2	0.3	fda_ligand_0122.pdbqt	ZINC000021297660	cellcept	-6.2	-7	-6.4	-6.53333	0.416333	-6.36667	0.37238	-0.333333	433.501
fda_ligand_0123.pdbqt	ZINC000021297660	cellcept	-6.1	-6	-6.2	-6.1	0.1	fda_ligand_0123.pdbqt	ZINC000021297660	cellcept	-6.8	-6.6	-6.4	-6.6	0.2	-6.35	0.308221	-0.5	433.501
fda_ligand_0124.pdbqt	ZINC000001530555	acyclovir	-6.8	-7.1	-7.4	-7.1	0.3	fda_ligand_0124.pdbqt	ZINC000001530555	acyclovir	-7.6	-7.7	-7.8	-7.7	0.1	-7.4	0.384708	-0.6	225.208
fda_ligand_0125.pdbqt	ZINC000009224016	milrinone	-5.7	-6	-6.1	-5.93333	0.208167	fda_ligand_0125.pdbqt	ZINC000009224016	milrinone	-6.1	-6.4	-6.4	-6.3	0.173205	-6.11667	0.263944	-0.366667	211.224
fda_ligand_0126.pdbqt	ZINC000009224016	milrinone	-5.7	-5.9	-6.5	-6.03333	0.416333	fda_ligand_0126.pdbqt	ZINC000009224016	milrinone	-6.1	-6.4	-6.1	-6.2	0.173205	-6.11667	0.299444	-0.166667	211.224
fda_ligand_0127.pdbqt	ZINC000019632713	nimotop	-7.2	-7.1	-7.3	-7.2	0.1	fda_ligand_0127.pdbqt	ZINC000019632713	nimotop	-7.1	-7	-7.1	-7.06667	0.057735	-7.13333	0.10328	0.133333	418.446
fda_ligand_0128.pdbqt	ZINC000003944422	norvir	-5.8	-6.2	-6.7	-6.23333	0.450925	fda_ligand_0128.pdbqt	ZINC000003944422	norvir	-6	-5.8	-6	-5.93333	0.11547	-6.08333	0.337145	0.3	720.962
fda_ligand_0129.pdbqt	ZINC000008403947	phentermine	-5	-5	-5	-5	0	fda_ligand_0129.pdbqt	ZINC000008403947	phentermine	-4.9	-4.9	-4.9	-4.9	0	-4.95	0.0547723	0.1	149.237
fda_ligand_0130.pdbqt	ZINC000052955754	ergotamine	-8.6	-7.9	-8.1	-8.2	0.360555	fda_ligand_0130.pdbqt	ZINC000052955754	ergotamine	-8.1	-8.3	-8.3	-8.23333	0.11547	-8.21667	0.240139	-0.0333333	581.673
fda_ligand_0131.pdbqt	ZINC000052955754	ergotamine	-8.7	-8.4	-8.4	-8.5	0.173205	fda_ligand_0131.pdbqt	ZINC000052955754	ergotamine	-8.5	-9.1	-9	-8.86667	0.321455	-8.68333	0.30605	-0.366667	581.673
fda_ligand_0132.pdbqt	ZINC000052955754	ergotamine	-8.7	-8.4	-8.5	-8.53333	0.152753	fda_ligand_0132.pdbqt	ZINC000052955754	ergotamine	-8.5	-9.1	-9	-8.86667	0.321455	-8.7	0.289828	-0.333333	581.673
fda_ligand_0133.pdbqt	ZINC000003815424	mestranol	-6	-6.2	-6.7	-6.3	0.360555	fda_ligand_0133.pdbqt	ZINC000003815424	mestranol	-6.6	-6.7	-6.7	-6.66667	0.057735	-6.48333	0.30605	-0.366667	310.437
fda_ligand_0134.pdbqt	ZINC000004097383	pancuronium	-6.6	-6.9	-6.2	-6.56667	0.351188	fda_ligand_0134.pdbqt	ZINC000004097383	pancuronium	-6.7	-7	-6.8	-6.83333	0.152753	-6.7	0.282843	-0.266667	572.875
fda_ligand_0135.pdbqt	ZINC000003960338	rozerem	-6.2	-6.5	-7.1	-6.6	0.458258	fda_ligand_0135.pdbqt	ZINC000003960338	rozerem	-6.2	-6.5	-6.7	-6.46667	0.251661	-6.53333	0.338625	0.133333	259.349
fda_ligand_0136.pdbqt	ZINC000003861768	ZINC3861768	-6.5	-7.5	-8.7	-7.56667	1.10151	fda_ligand_0136.pdbqt	ZINC000003861768	ZINC3861768	-7.1	-7.2	-7.9	-7.4	0.43589	-7.48333	0.754763	0.166667	244.207
fda_ligand_0137.pdbqt	ZINC000000538266	quazepam	-6.7	-6.2	-6.4	-6.43333	0.251661	fda_ligand_0137.pdbqt	ZINC000000538266	quazepam	-6.4	-6.4	-6.4	-6.4	0	-6.41667	0.160208	0.0333333	386.801
fda_ligand_0138.pdbqt	ZINC000012503291	spiriva	-6.4	-6.4	-6.7	-6.5	0.173205	fda_ligand_0138.pdbqt	ZINC000012503291	spiriva	-6.8	-6.8	-6.9	-6.83333	0.057735	-6.66667	0.216025	-0.333333	392.522
fda_ligand_0139.pdbqt	ZINC000000113442	metronidazole	-5.9	-6	-6	-5.96667	0.057735	fda_ligand_0139.pdbqt	ZINC000000113442	metronidazole	-6	-6.1	-6	-6.03333	0.057735	-6	0.0632456	-0.0666667	171.156
fda_ligand_0140.pdbqt	ZINC000001538857	bosentan	-6.5	-7.3	-7.6	-7.13333	0.568624	fda_ligand_0140.pdbqt	ZINC000001538857	bosentan	-7.9	-7.9	-8	-7.93333	0.057735	-7.53333	0.568038	-0.8	551.625
fda_ligand_0141.pdbqt	ZINC000001542392	alfuzosin	-5.7	-6	-6.1	-5.93333	0.208167	fda_ligand_0141.pdbqt	ZINC000001542392	alfuzosin	-6.7	-6.6	-6.8	-6.7	0.1	-6.31667	0.444597	-0.766667	389.456
fda_ligand_0142.pdbqt	ZINC000001542392	alfuzosin	-6.4	-6.2	-6.1	-6.23333	0.152753	fda_ligand_0142.pdbqt	ZINC000001542392	alfuzosin	-6.3	-6.6	-6.4	-6.43333	0.152753	-6.33333	0.175119	-0.2	389.456
fda_ligand_0143.pdbqt	ZINC000001542392	alfuzosin	-6.5	-6.1	-7.3	-6.63333	0.61101	fda_ligand_0143.pdbqt	ZINC000001542392	alfuzosin	-6	-6.9	-6.2	-6.36667	0.472582	-6.5	0.509902	0.266667	389.456
fda_ligand_0144.pdbqt	ZINC000003820029	trajenta	-6.8	-6.9	-7.3	-7	0.264575	fda_ligand_0144.pdbqt	ZINC000003820029	trajenta	-8	-7.9	-8	-7.96667	0.057735	-7.48333	0.556477	-0.966667	472.553
fda_ligand_0145.pdbqt	ZINC000011616925	folotyn	-7.4	-7.3	-7.1	-7.26667	0.152753	fda_ligand_0145.pdbqt	ZINC000011616925	folotyn	-7.7	-7.7	-7.8	-7.73333	0.057735	-7.5	0.275681	-0.466667	477.481
fda_ligand_0146.pdbqt	ZINC000022056030	emsam	-4.9	-4.9	-5.5	-5.1	0.34641	fda_ligand_0146.pdbqt	ZINC000022056030	emsam	-5	-5.4	-5.1	-5.16667	0.208167	-5.13333	0.258199	-0.0666667	187.286
fda_ligand_0147.pdbqt	ZINC000022056030	emsam	-4.7	-4.7	-5.4	-4.93333	0.404145	fda_ligand_0147.pdbqt	ZINC000022056030	emsam	-4.6	-4.9	-5	-4.83333	0.208167	-4.88333	0.292689	0.1	187.286
fda_ligand_0148.pdbqt	ZINC000022056030	emsam	-4.7	-4.7	-5.4	-4.93333	0.404145	fda_ligand_0148.pdbqt	ZINC000022056030	emsam	-4.8	-4.8	-5	-4.86667	0.11547	-4.9	0.268328	0.0666667	187.286
fda_ligand_0149.pdbqt	ZINC000000004778	nev	-6.6	-6.7	-6.6	-6.63333	0.057735	fda_ligand_0149.pdbqt	ZINC000000004778	nev	-6.5	-6.6	-6.7	-6.6	0.1	-6.61667	0.0752773	0.0333333	266.304
fda_ligand_0150.pdbqt	ZINC000000000746	terbutaline	-5.9	-5.9	-6	-5.93333	0.057735	fda_ligand_0150.pdbqt	ZINC000000000746	terbutaline	-6.2	-6.2	-6.2	-6.2	0	-6.06667	0.150555	-0.266667	225.288
fda_ligand_0151.pdbqt	ZINC000000136138	oxybenzone	-6.5	-6.4	-7.2	-6.7	0.43589	fda_ligand_0151.pdbqt	ZINC000000136138	oxybenzone	-6.4	-6.5	-6.5	-6.46667	0.057735	-6.58333	0.30605	0.233333	228.247
fda_ligand_0152.pdbqt	ZINC000000136138	oxybenzone	-6.3	-6.4	-6.9	-6.53333	0.321455	fda_ligand_0152.pdbqt	ZINC000000136138	oxybenzone	-6.4	-6.4	-6.4	-6.4	0	-6.46667	0.216025	0.133333	228.247
fda_ligand_0153.pdbqt	ZINC000001530752	oxybutynin	-5.1	-5.1	-5.5	-5.23333	0.23094	fda_ligand_0153.pdbqt	ZINC000001530752	oxybutynin	-5.7	-6	-5.7	-5.8	0.173205	-5.51667	0.360093	-0.566667	357.494
fda_ligand_0154.pdbqt	ZINC000001530752	oxybutynin	-5.1	-5.3	-5.6	-5.33333	0.251661	fda_ligand_0154.pdbqt	ZINC000001530752	oxybutynin	-5.6	-5.7	-5.7	-5.66667	0.057735	-5.5	0.244949	-0.333333	357.494
fda_ligand_0155.pdbqt	ZINC000002005550	secobarbital	-6.5	-6.8	-6.7	-6.66667	0.152753	fda_ligand_0155.pdbqt	ZINC000002005550	secobarbital	-6.8	-6.8	-6.9	-6.83333	0.057735	-6.75	0.13784	-0.166667	238.287
fda_ligand_0156.pdbqt	ZINC000002005550	secobarbital	-6.5	-6.8	-7	-6.76667	0.251661	fda_ligand_0156.pdbqt	ZINC000002005550	secobarbital	-6.5	-6.6	-6.7	-6.6	0.1	-6.68333	0.194079	0.166667	238.287
fda_ligand_0157.pdbqt	ZINC000003938704	ellence	-6.9	-6.9	-7.3	-7.03333	0.23094	fda_ligand_0157.pdbqt	ZINC000003938704	ellence	-7.8	-8.1	-7.6	-7.83333	0.251661	-7.43333	0.488535	-0.8	543.525
fda_ligand_0158.pdbqt	ZINC000003938704	ellence	-7	-7	-7.4	-7.13333	0.23094	fda_ligand_0158.pdbqt	ZINC000003938704	ellence	-8	-8.2	-7.8	-8	0.2	-7.56667	0.51251	-0.866667	543.525
fda_ligand_0159.pdbqt	ZINC000029416466	sqv	-7.6	-7.7	-7.4	-7.56667	0.152753	fda_ligand_0159.pdbqt	ZINC000029416466	sqv	-8	-8	-7.7	-7.9	0.173205	-7.73333	0.233809	-0.333333	670.855
fda_ligand_0160.pdbqt	ZINC000029416466	sqv	-6.5	-7.5	-7.2	-7.06667	0.51316	fda_ligand_0160.pdbqt	ZINC000029416466	sqv	-7.5	-8.1	-7.4	-7.66667	0.378594	-7.36667	0.520256	-0.6	670.855
fda_ligand_0161.pdbqt	ZINC000029416466	sqv	-6	-6.8	-6	-6.26667	0.46188	fda_ligand_0161.pdbqt	ZINC000029416466	sqv	-7.7	-8	-7.3	-7.66667	0.351188	-6.96667	0.850098	-1.4	670.855
fda_ligand_0162.pdbqt	ZINC000003812944	flutamide	-6.2	-6.3	-6.5	-6.33333	0.152753	fda_ligand_0162.pdbqt	ZINC000003812944	flutamide	-6.4	-6.8	-6.5	-6.56667	0.208167	-6.45	0.207364	-0.233333	276.214
fda_ligand_0163.pdbqt	ZINC000000538509	trimethobenzamide	-6.2	-6.4	-6.3	-6.3	0.1	fda_ligand_0163.pdbqt	ZINC000000538509	trimethobenzamide	-6.6	-6.7	-6.7	-6.66667	0.057735	-6.48333	0.213698	-0.366667	388.464
fda_ligand_0164.pdbqt	ZINC000000538509	trimethobenzamide	-6.3	-6.2	-6.2	-6.23333	0.057735	fda_ligand_0164.pdbqt	ZINC000000538509	trimethobenzamide	-6.6	-6.7	-6.8	-6.7	0.1	-6.46667	0.265832	-0.466667	388.464
fda_ligand_0165.pdbqt	ZINC000001482049	droxidopa	-6.4	-6.5	-7.1	-6.66667	0.378594	fda_ligand_0165.pdbqt	ZINC000001482049	droxidopa	-6.8	-7.1	-7.1	-7	0.173205	-6.83333	0.320416	-0.333333	213.189
fda_ligand_0166.pdbqt	ZINC000001482049	droxidopa	-6.4	-6.5	-7.1	-6.66667	0.378594	fda_ligand_0166.pdbqt	ZINC000001482049	droxidopa	-7.3	-7.4	-7.4	-7.36667	0.057735	-7.01667	0.453505	-0.7	213.189
fda_ligand_0167.pdbqt	ZINC000242437513	ZINC242437513	-5.5	-5.7	-5.9	-5.7	0.2	fda_ligand_0167.pdbqt	ZINC000242437513	ZINC242437513	-6	-7	-6.9	-6.63333	0.550757	-6.16667	0.631401	-0.933333	477.603
fda_ligand_0168.pdbqt	ZINC000003784120	iloprost	-6.1	-6.3	-6	-6.13333	0.152753	fda_ligand_0168.pdbqt	ZINC000003784120	iloprost	-6.7	-6.7	-6.9	-6.76667	0.11547	-6.45	0.367423	-0.633333	360.494
fda_ligand_0169.pdbqt	ZINC000003830958	iopromide	-5.3	-5.2	-5.2	-5.23333	0.057735	fda_ligand_0169.pdbqt	ZINC000003830958	iopromide	-5.7	-6	-6	-5.9	0.173205	-5.56667	0.382971	-0.666667	791.115
fda_ligand_0170.pdbqt	ZINC000016159083	pimavanserin	-6.3	-6	-6.3	-6.2	0.173205	fda_ligand_0170.pdbqt	ZINC000016159083	pimavanserin	-6.8	-6.8	-6.6	-6.73333	0.11547	-6.46667	0.320416	-0.533333	427.564
fda_ligand_0171.pdbqt	ZINC000016159083	pimavanserin	-6.3	-6.1	-6.2	-6.2	0.1	fda_ligand_0171.pdbqt	ZINC000016159083	pimavanserin	-6.8	-6.8	-6.6	-6.73333	0.11547	-6.46667	0.307679	-0.533333	427.564
fda_ligand_0172.pdbqt	ZINC000022851765	eovist	-6.5	-6.6	-6.2	-6.43333	0.208167	fda_ligand_0172.pdbqt	ZINC000022851765	eovist	-6.3	-6.8	-6.5	-6.53333	0.251661	-6.48333	0.213698	-0.1	527.527
fda_ligand_0173.pdbqt	ZINC000022851765	eovist	-7	-6.4	-6.3	-6.56667	0.378594	fda_ligand_0173.pdbqt	ZINC000022851765	eovist	-7.1	-6.7	-7.3	-7.03333	0.305505	-6.8	0.4	-0.466667	527.527
fda_ligand_0174.pdbqt	ZINC000022851765	eovist	-7	-6.5	-6.5	-6.66667	0.288675	fda_ligand_0174.pdbqt	ZINC000022851765	eovist	-6.4	-6.7	-6.7	-6.6	0.173205	-6.63333	0.216025	0.0666667	527.527
fda_ligand_0175.pdbqt	ZINC000028232750	valstar	-7.3	-7	-8.4	-7.56667	0.737111	fda_ligand_0175.pdbqt	ZINC000028232750	valstar	-8.5	-8.3	-8.8	-8.53333	0.251661	-8.05	0.723187	-0.966667	723.65
fda_ligand_0176.pdbqt	ZINC000028232750	valstar	-7.3	-7.1	-8.1	-7.5	0.52915	fda_ligand_0176.pdbqt	ZINC000028232750	valstar	-8.4	-8.4	-8	-8.26667	0.23094	-7.88333	0.556477	-0.766667	723.65
fda_ligand_0177.pdbqt	ZINC000028232750	valstar	-7.7	-7	-8.6	-7.76667	0.802081	fda_ligand_0177.pdbqt	ZINC000028232750	valstar	-7.4	-8.6	-8.3	-8.1	0.6245	-7.93333	0.668331	-0.333333	723.65
fda_ligand_0178.pdbqt	ZINC000028639340	noxafil	-6.4	-6.9	-7.4	-6.9	0.5	fda_ligand_0178.pdbqt	ZINC000028639340	noxafil	-6.8	-7.3	-7	-7.03333	0.251661	-6.96667	0.361478	-0.133333	700.791
fda_ligand_0179.pdbqt	ZINC000003794601	citalopram	-6.4	-5.9	-6.6	-6.3	0.360555	fda_ligand_0179.pdbqt	ZINC000003794601	citalopram	-6.7	-6.6	-6.6	-6.63333	0.057735	-6.46667	0.294392	-0.333333	324.399
fda_ligand_0180.pdbqt	ZINC000003813003	klonopin	-7	-7.1	-7.7	-7.26667	0.378594	fda_ligand_0180.pdbqt	ZINC000003813003	klonopin	-7.5	-7.9	-8	-7.8	0.264575	-7.53333	0.413118	-0.533333	315.716
fda_ligand_0181.pdbqt	ZINC000004258316	azathioprine	-7.6	-7.7	-7.8	-7.7	0.1	fda_ligand_0181.pdbqt	ZINC000004258316	azathioprine	-7.4	-7.4	-7.8	-7.53333	0.23094	-7.61667	0.183485	0.166667	277.269
fda_ligand_0182.pdbqt	ZINC000001543873	shh	-6.7	-6.3	-6.6	-6.53333	0.208167	fda_ligand_0182.pdbqt	ZINC000001543873	shh	-7.5	-7.4	-7.7	-7.53333	0.152753	-7.03333	0.571548	-1	264.325
fda_ligand_0183.pdbqt	ZINC000001543873	shh	-6.3	-5.9	-6.4	-6.2	0.264575	fda_ligand_0183.pdbqt	ZINC000001543873	shh	-7.3	-7.1	-6.5	-6.96667	0.416333	-6.58333	0.523132	-0.766667	264.325
fda_ligand_0184.pdbqt	ZINC000001846431	ZINC1846431	-5.4	-5.7	-5.8	-5.63333	0.208167	fda_ligand_0184.pdbqt	ZINC000001846431	ZINC1846431	-6	-6	-6.2	-6.06667	0.11547	-5.85	0.281069	-0.433333	182.147
fda_ligand_0185.pdbqt	ZINC000003818726	belinostat	-8.1	-8.1	-8.1	-8.1	0	fda_ligand_0185.pdbqt	ZINC000003818726	belinostat	-8.4	-8.7	-8.5	-8.53333	0.152753	-8.31667	0.256255	-0.433333	318.354
fda_ligand_0186.pdbqt	ZINC000003818726	belinostat	-8.2	-8.1	-8.1	-8.13333	0.057735	fda_ligand_0186.pdbqt	ZINC000003818726	belinostat	-8.4	-8.7	-8.5	-8.53333	0.152753	-8.33333	0.242212	-0.4	318.354
fda_ligand_0187.pdbqt	ZINC000003843378	tecfidera	-5.4	-5.4	-5.3	-5.36667	0.057735	fda_ligand_0187.pdbqt	ZINC000003843378	tecfidera	-5.7	-5.3	-5.6	-5.53333	0.208167	-5.45	0.164317	-0.166667	144.126
fda_ligand_0188.pdbqt	ZINC000005844788	ZINC5844788	-6.4	-6.4	-8.1	-6.96667	0.981495	fda_ligand_0188.pdbqt	ZINC000005844788	ZINC5844788	-6.9	-7.4	-7	-7.1	0.264575	-7.03333	0.647045	-0.133333	405.441
fda_ligand_0189.pdbqt	ZINC000005844788	ZINC5844788	-6.5	-7.4	-7.6	-7.16667	0.585947	fda_ligand_0189.pdbqt	ZINC000005844788	ZINC5844788	-7.1	-6.9	-7.2	-7.06667	0.152753	-7.11667	0.386868	0.1	405.441
fda_ligand_0190.pdbqt	ZINC000253498282	ZINC253498282	-6.3	-6.4	-6.9	-6.53333	0.321455	fda_ligand_0190.pdbqt	ZINC000253498282	ZINC253498282	-6.6	-7.1	-7	-6.9	0.264575	-6.71667	0.33116	-0.366667	312.453
fda_ligand_0191.pdbqt	ZINC000014164617	obeticholic acid	-6.6	-6.9	-6.7	-6.73333	0.152753	fda_ligand_0191.pdbqt	ZINC000014164617	obeticholic acid	-7.5	-7.4	-7.5	-7.46667	0.057735	-7.1	0.414729	-0.733333	420.634
fda_ligand_0192.pdbqt	ZINC000100008319	ZINC100008319	-6.5	-6.6	-6.3	-6.46667	0.152753	fda_ligand_0192.pdbqt	ZINC000100008319	ZINC100008319	-7.1	-6.6	-7.1	-6.93333	0.288675	-6.7	0.328634	-0.466667	392.522
fda_ligand_0193.pdbqt	ZINC000100061056	ZINC100061056	-5.2	-5.2	-5.3	-5.23333	0.057735	fda_ligand_0193.pdbqt	ZINC000100061056	ZINC100061056	-5.3	-5.3	-5.4	-5.33333	0.057735	-5.28333	0.0752773	-0.1	136.154
fda_ligand_0194.pdbqt	ZINC000003800008	dostinex	-6	-6.1	-6.3	-6.13333	0.152753	fda_ligand_0194.pdbqt	ZINC000003800008	dostinex	-7.2	-6.6	-7	-6.93333	0.305505	-6.53333	0.488535	-0.8	451.615
fda_ligand_0195.pdbqt	ZINC000003800008	dostinex	-6	-6.1	-6.3	-6.13333	0.152753	fda_ligand_0195.pdbqt	ZINC000003800008	dostinex	-6.7	-6.6	-6.9	-6.73333	0.152753	-6.43333	0.355903	-0.6	451.615
fda_ligand_0196.pdbqt	ZINC000003800008	dostinex	-6.5	-6.6	-6.3	-6.46667	0.152753	fda_ligand_0196.pdbqt	ZINC000003800008	dostinex	-7	-7	-7.1	-7.03333	0.057735	-6.75	0.327109	-0.566667	451.615
fda_ligand_0197.pdbqt	ZINC000003830347	butalbital	-6.9	-6.8	-6.7	-6.8	0.1	fda_ligand_0197.pdbqt	ZINC000003830347	butalbital	-6.9	-7	-7	-6.96667	0.057735	-6.88333	0.116905	-0.166667	224.26
fda_ligand_0198.pdbqt	ZINC000003830347	butalbital	-6.8	-6.8	-6.7	-6.76667	0.057735	fda_ligand_0198.pdbqt	ZINC000003830347	butalbital	-6.9	-7	-7	-6.96667	0.057735	-6.86667	0.121106	-0.2	224.26
fda_ligand_0199.pdbqt	ZINC000003921872	dovonex	-6.6	-6.7	-6.5	-6.6	0.1	fda_ligand_0199.pdbqt	ZINC000003921872	dovonex	-7.3	-7.2	-7.5	-7.33333	0.152753	-6.96667	0.417931	-0.733333	412.614
fda_ligand_0200.pdbqt	ZINC000012404516	toremifene	-5	-5.2	-6	-5.4	0.52915	fda_ligand_0200.pdbqt	ZINC000012404516	toremifene	-5.7	-5.8	-5.8	-5.76667	0.057735	-5.58333	0.392003	-0.366667	405.969
fda_ligand_0201.pdbqt	ZINC000012404516	toremifene	-5	-5.3	-6.2	-5.5	0.6245	fda_ligand_0201.pdbqt	ZINC000012404516	toremifene	-5.6	-5.6	-5.8	-5.66667	0.11547	-5.58333	0.411906	-0.166667	405.969
fda_ligand_0202.pdbqt	ZINC000000002101	avc	-5.6	-5.8	-6.2	-5.86667	0.305505	fda_ligand_0202.pdbqt	ZINC000000002101	avc	-6	-6.4	-6.5	-6.3	0.264575	-6.08333	0.348807	-0.433333	172.209
fda_ligand_0203.pdbqt	ZINC000001530751	oxybutynin	-5.6	-5.5	-6.1	-5.73333	0.321455	fda_ligand_0203.pdbqt	ZINC000001530751	oxybutynin	-5.9	-6.4	-6.3	-6.2	0.264575	-5.96667	0.36697	-0.466667	357.494
fda_ligand_0204.pdbqt	ZINC000001530751	oxybutynin	-5.6	-5.3	-6	-5.63333	0.351188	fda_ligand_0204.pdbqt	ZINC000001530751	oxybutynin	-6.4	-5.9	-6.1	-6.13333	0.251661	-5.88333	0.386868	-0.5	357.494
fda_ligand_0205.pdbqt	ZINC000001530981	terbinafine	-5.5	-5.7	-5.9	-5.7	0.2	fda_ligand_0205.pdbqt	ZINC000001530981	terbinafine	-5.8	-5.7	-6	-5.83333	0.152753	-5.76667	0.175119	-0.133333	291.438
fda_ligand_0206.pdbqt	ZINC000001530981	terbinafine	-5.3	-5.4	-5.7	-5.46667	0.208167	fda_ligand_0206.pdbqt	ZINC000001530981	terbinafine	-6.7	-6	-6.9	-6.53333	0.472582	-6	0.669328	-1.06667	291.438
fda_ligand_0207.pdbqt	ZINC000001530981	terbinafine	-5.5	-5	-5.6	-5.36667	0.321455	fda_ligand_0207.pdbqt	ZINC000001530981	terbinafine	-6.5	-6.2	-6.4	-6.36667	0.152753	-5.86667	0.592171	-1	291.438
fda_ligand_0208.pdbqt	ZINC000001530862	primaquine	-6.1	-5.5	-5.8	-5.8	0.3	fda_ligand_0208.pdbqt	ZINC000001530862	primaquine	-6.5	-6.3	-6.3	-6.36667	0.11547	-6.08333	0.371035	-0.566667	259.353
fda_ligand_0209.pdbqt	ZINC000003824921	fexofenadine	-5.6	-5.8	-5.9	-5.76667	0.152753	fda_ligand_0209.pdbqt	ZINC000003824921	fexofenadine	-6.5	-6.7	-6.9	-6.7	0.2	-6.23333	0.535413	-0.933333	501.667
fda_ligand_0210.pdbqt	ZINC000053229445	rocuronium	-5.9	-5.8	-5.9	-5.86667	0.057735	fda_ligand_0210.pdbqt	ZINC000053229445	rocuronium	-6.9	-7.4	-7.2	-7.16667	0.251661	-6.51667	0.730525	-1.3	529.786
fda_ligand_0211.pdbqt	ZINC000053229445	rocuronium	-5.9	-5.6	-5.8	-5.76667	0.152753	fda_ligand_0211.pdbqt	ZINC000053229445	rocuronium	-6.8	-7.4	-7.2	-7.13333	0.305505	-6.45	0.779102	-1.36667	529.786
fda_ligand_0212.pdbqt	ZINC000000002041	ropinirole	-5.8	-5.9	-5.9	-5.86667	0.057735	fda_ligand_0212.pdbqt	ZINC000000002041	ropinirole	-6.5	-6.6	-6.8	-6.63333	0.152753	-6.25	0.432435	-0.766667	260.381
fda_ligand_0213.pdbqt	ZINC000068153186	dabrafenib	-7.7	-8	-7.8	-7.83333	0.152753	fda_ligand_0213.pdbqt	ZINC000068153186	dabrafenib	-8.1	-8.3	-8.3	-8.23333	0.11547	-8.03333	0.250333	-0.4	519.574
fda_ligand_0214.pdbqt	ZINC000068153186	dabrafenib	-7.5	-7.9	-7.9	-7.76667	0.23094	fda_ligand_0214.pdbqt	ZINC000068153186	dabrafenib	-8	-8.3	-8.2	-8.16667	0.152753	-7.96667	0.280476	-0.4	519.574
fda_ligand_0215.pdbqt	ZINC000068202099	erismodegib	-7.1	-7	-7.5	-7.2	0.264575	fda_ligand_0215.pdbqt	ZINC000068202099	erismodegib	-7.7	-7.4	-7.7	-7.6	0.173205	-7.4	0.296648	-0.4	485.506
fda_ligand_0216.pdbqt	ZINC000068204830	daclatasvir	-7.9	-6.8	-7.9	-7.53333	0.635085	fda_ligand_0216.pdbqt	ZINC000068204830	daclatasvir	-7	-6.8	-7.3	-7.03333	0.251661	-7.28333	0.511534	0.5	738.89
fda_ligand_0217.pdbqt	ZINC000003872566	fexofenadine	-6.1	-6	-7.2	-6.43333	0.665833	fda_ligand_0217.pdbqt	ZINC000003872566	fexofenadine	-6.7	-6.8	-6.5	-6.66667	0.152753	-6.55	0.450555	-0.233333	501.667
fda_ligand_0218.pdbqt	ZINC000003872994	nizoral	-6.9	-6.7	-7.1	-6.9	0.2	fda_ligand_0218.pdbqt	ZINC000003872994	nizoral	-7.5	-6.9	-6.8	-7.06667	0.378594	-6.98333	0.285774	-0.166667	531.44
fda_ligand_0219.pdbqt	ZINC000003872994	nizoral	-6.8	-7.1	-7.1	-7	0.173205	fda_ligand_0219.pdbqt	ZINC000003872994	nizoral	-7.5	-7.1	-7	-7.2	0.264575	-7.1	0.228035	-0.2	531.44
fda_ligand_0220.pdbqt	ZINC000000000061	baclofen	-5.6	-5.8	-6.2	-5.86667	0.305505	fda_ligand_0220.pdbqt	ZINC000000000061	baclofen	-5.9	-5.9	-6	-5.93333	0.057735	-5.9	0.2	-0.0666667	213.664
fda_ligand_0221.pdbqt	ZINC000000085733	baclofen	-5.8	-5.9	-6.2	-5.96667	0.208167	fda_ligand_0221.pdbqt	ZINC000000085733	baclofen	-6.1	-6.1	-6.2	-6.13333	0.057735	-6.05	0.164317	-0.166667	213.664
fda_ligand_0222.pdbqt	ZINC000001536109	folotyn	-7.3	-7.2	-7.4	-7.3	0.1	fda_ligand_0222.pdbqt	ZINC000001536109	folotyn	-7.5	-7.6	-7.9	-7.66667	0.208167	-7.48333	0.248328	-0.366667	477.481
fda_ligand_0223.pdbqt	ZINC000001546066	erlotinib	-6.4	-6.9	-6.6	-6.63333	0.251661	fda_ligand_0223.pdbqt	ZINC000001546066	erlotinib	-7	-6.9	-6.8	-6.9	0.1	-6.76667	0.225093	-0.266667	393.443
fda_ligand_0224.pdbqt	ZINC000001530863	primaquine	-5.7	-5.3	-5.9	-5.63333	0.305505	fda_ligand_0224.pdbqt	ZINC000001530863	primaquine	-6.5	-6.6	-6.2	-6.43333	0.208167	-6.03333	0.496655	-0.8	259.353
fda_ligand_0225.pdbqt	ZINC000019632633	selegiline	-5	-5.1	-4.7	-4.93333	0.208167	fda_ligand_0225.pdbqt	ZINC000019632633	selegiline	-4.5	-5.3	-4.8	-4.86667	0.404145	-4.9	0.289828	0.0666667	187.286
fda_ligand_0226.pdbqt	ZINC000019632633	selegiline	-5.1	-4.7	-4.9	-4.9	0.2	fda_ligand_0226.pdbqt	ZINC000019632633	selegiline	-5.1	-4.7	-5.4	-5.06667	0.351188	-4.98333	0.271416	-0.166667	187.286
fda_ligand_0227.pdbqt	ZINC000019632633	selegiline	-5	-5	-4.7	-4.9	0.173205	fda_ligand_0227.pdbqt	ZINC000019632633	selegiline	-4.5	-4.7	-4.8	-4.66667	0.152753	-4.78333	0.194079	0.233333	187.286
fda_ligand_0228.pdbqt	ZINC000003802690	baraclude	-7.4	-7.3	-8.2	-7.63333	0.493288	fda_ligand_0228.pdbqt	ZINC000003802690	baraclude	-7.3	-7.5	-7.5	-7.43333	0.11547	-7.53333	0.338625	0.2	277.284
fda_ligand_0229.pdbqt	ZINC000003798750	sabril	-5	-5	-4.9	-4.96667	0.057735	fda_ligand_0229.pdbqt	ZINC000003798750	sabril	-5.1	-5.2	-5.2	-5.16667	0.057735	-5.06667	0.121106	-0.2	129.159
fda_ligand_0230.pdbqt	ZINC000003874950	secobarbital	-6.5	-6.5	-6.5	-6.5	0	fda_ligand_0230.pdbqt	ZINC000003874950	secobarbital	-6.4	-6.8	-6.8	-6.66667	0.23094	-6.58333	0.17224	-0.166667	238.287
fda_ligand_0231.pdbqt	ZINC000003874950	secobarbital	-6.5	-6.7	-6.8	-6.66667	0.152753	fda_ligand_0231.pdbqt	ZINC000003874950	secobarbital	-6.7	-6.7	-6.8	-6.73333	0.057735	-6.7	0.109545	-0.0666667	238.287
fda_ligand_0232.pdbqt	ZINC000000895042	cysteine	-4.1	-4.2	-4.2	-4.16667	0.057735	fda_ligand_0232.pdbqt	ZINC000000895042	cysteine	-4.3	-4.3	-4.3	-4.3	0	-4.23333	0.0816497	-0.133333	121.161
fda_ligand_0233.pdbqt	ZINC000000895048	ifp	-4.1	-4.2	-4.5	-4.26667	0.208167	fda_ligand_0233.pdbqt	ZINC000000895048	ifp	-4.5	-4.6	-4.7	-4.6	0.1	-4.43333	0.233809	-0.333333	92.094
fda_ligand_0234.pdbqt	ZINC000000895316	glycol	-3.7	-3.9	-4.4	-4	0.360555	fda_ligand_0234.pdbqt	ZINC000000895316	glycol	-4	-4.3	-4.2	-4.16667	0.152753	-4.08333	0.263944	-0.166667	76.095
fda_ligand_0235.pdbqt	ZINC000000901791	oxyproline	-5.4	-5.4	-5.5	-5.43333	0.057735	fda_ligand_0235.pdbqt	ZINC000000901791	oxyproline	-5.6	-5.6	-5.6	-5.6	0	-5.51667	0.0983192	-0.166667	131.131
fda_ligand_0236.pdbqt	ZINC000001531008	gluconate	-5.8	-5.7	-6.3	-5.93333	0.321455	fda_ligand_0236.pdbqt	ZINC000001531008	gluconate	-5.9	-5.9	-6	-5.93333	0.057735	-5.93333	0.206559	0	196.155
fda_ligand_0237.pdbqt	ZINC000001532522	lysine	-5.1	-5.1	-5.1	-5.1	0	fda_ligand_0237.pdbqt	ZINC000001532522	lysine	-5.1	-5.3	-5.3	-5.23333	0.11547	-5.16667	0.10328	-0.133333	146.19
fda_ligand_0238.pdbqt	ZINC000002539702	fujiglucon	-6	-6.1	-6.1	-6.06667	0.057735	fda_ligand_0238.pdbqt	ZINC000002539702	fujiglucon	-6.3	-6.2	-6.3	-6.26667	0.057735	-6.16667	0.121106	-0.2	178.14
fda_ligand_0239.pdbqt	ZINC000003809490	taurine	-4.3	-4.3	-4.5	-4.36667	0.11547	fda_ligand_0239.pdbqt	ZINC000003809490	taurine	-4.3	-4.6	-4.6	-4.5	0.173205	-4.43333	0.150555	-0.133333	125.149
fda_ligand_0240.pdbqt	ZINC000003830891	glutathione	-6	-6.4	-6.6	-6.33333	0.305505	fda_ligand_0240.pdbqt	ZINC000003830891	glutathione	-6.3	-6.6	-6.5	-6.46667	0.152753	-6.4	0.228035	-0.133333	307.328
fda_ligand_0241.pdbqt	ZINC000004474414	calderol	-6.4	-6.4	-7	-6.6	0.34641	fda_ligand_0241.pdbqt	ZINC000004474414	calderol	-7.1	-7.4	-7.3	-7.26667	0.152753	-6.93333	0.436654	-0.666667	400.647
fda_ligand_0242.pdbqt	ZINC000008214573	ZINC8214573	-4.5	-4.7	-4.7	-4.63333	0.11547	fda_ligand_0242.pdbqt	ZINC000008214573	ZINC8214573	-4.6	-4.9	-4.9	-4.8	0.173205	-4.71667	0.160208	-0.166667	114.147
fda_ligand_0243.pdbqt	ZINC000008214573	ZINC8214573	-3.5	-3.7	-3.8	-3.66667	0.152753	fda_ligand_0243.pdbqt	ZINC000008214573	ZINC8214573	-3.6	-4	-4	-3.86667	0.23094	-3.76667	0.206559	-0.2	114.147
fda_ligand_0244.pdbqt	ZINC000033943508	dcva	-6.2	-6	-5.7	-5.96667	0.251661	fda_ligand_0244.pdbqt	ZINC000033943508	dcva	-5.8	-6.1	-6.5	-6.13333	0.351188	-6.05	0.288097	-0.166667	300.442
fda_ligand_0245.pdbqt	ZINC000000001011	benzoate	-5.3	-5.3	-5.2	-5.26667	0.057735	fda_ligand_0245.pdbqt	ZINC000000001011	benzoate	-5.3	-5.4	-5.5	-5.4	0.1	-5.33333	0.10328	-0.133333	122.123
fda_ligand_0246.pdbqt	ZINC000000001411	eugenol	-5.7	-5.8	-5.7	-5.73333	0.057735	fda_ligand_0246.pdbqt	ZINC000000001411	eugenol	-5.8	-6	-5.9	-5.9	0.1	-5.81667	0.116905	-0.166667	164.204
fda_ligand_0247.pdbqt	ZINC000000895318	glycol	-4	-4.1	-4.1	-4.06667	0.057735	fda_ligand_0247.pdbqt	ZINC000000895318	glycol	-4.3	-4.4	-4.5	-4.4	0.1	-4.23333	0.196638	-0.333333	76.095
fda_ligand_0248.pdbqt	ZINC000001530575	capsaicin	-5.6	-6.1	-6.1	-5.93333	0.288675	fda_ligand_0248.pdbqt	ZINC000001530575	capsaicin	-5.6	-5.6	-5.8	-5.66667	0.11547	-5.8	0.244949	0.266667	305.418
fda_ligand_0249.pdbqt	ZINC000003780893	simvastatin	-5.9	-5.8	-6.2	-5.96667	0.208167	fda_ligand_0249.pdbqt	ZINC000003780893	simvastatin	-6.3	-6.4	-6.5	-6.4	0.1	-6.18333	0.278687	-0.433333	418.574
fda_ligand_0250.pdbqt	ZINC000003875332	dexamethasone	-7.6	-7.7	-7.8	-7.7	0.1	fda_ligand_0250.pdbqt	ZINC000003875332	dexamethasone	-7.5	-7.6	-7.6	-7.56667	0.057735	-7.63333	0.10328	0.133333	392.467
fda_ligand_0251.pdbqt	ZINC000004095858	eprolin	-4.2	-5.1	-5	-4.76667	0.493288	fda_ligand_0251.pdbqt	ZINC000004095858	eprolin	-5.7	-5.6	-5.2	-5.5	0.264575	-5.13333	0.535413	-0.733333	430.717
fda_ligand_0252.pdbqt	ZINC000008577218	pga	-7.9	-7.7	-7.7	-7.76667	0.11547	fda_ligand_0252.pdbqt	ZINC000008577218	pga	-7.9	-8.1	-8.1	-8.03333	0.11547	-7.9	0.178885	-0.266667	441.404
fda_ligand_0253.pdbqt	ZINC000000643143	nizoral	-7.2	-6.8	-7.6	-7.2	0.4	fda_ligand_0253.pdbqt	ZINC000000643143	nizoral	-7.1	-7.2	-7	-7.1	0.1	-7.15	0.266458	0.1	531.44
fda_ligand_0254.pdbqt	ZINC000000643143	nizoral	-6.7	-6.5	-7.8	-7	0.7	fda_ligand_0254.pdbqt	ZINC000000643143	nizoral	-6.9	-7.4	-6.9	-7.06667	0.288675	-7.03333	0.480278	-0.0666667	531.44
fda_ligand_0255.pdbqt	ZINC000100015048	dn-101	-6.2	-6.4	-7.1	-6.56667	0.472582	fda_ligand_0255.pdbqt	ZINC000100015048	dn-101	-7.3	-7.6	-7.4	-7.43333	0.152753	-7	0.56921	-0.866667	416.646
fda_ligand_0256.pdbqt	ZINC000004474460	ZINC4474460	-5.9	-6.1	-6.2	-6.06667	0.152753	fda_ligand_0256.pdbqt	ZINC000004474460	ZINC4474460	-6.7	-7.1	-6.8	-6.86667	0.208167	-6.46667	0.467618	-0.8	384.648
fda_ligand_0257.pdbqt	ZINC000004629876	daral	-6.5	-6.5	-6.3	-6.43333	0.11547	fda_ligand_0257.pdbqt	ZINC000004629876	daral	-7.2	-7.3	-7.4	-7.3	0.1	-6.86667	0.484424	-0.866667	396.659
fda_ligand_0258.pdbqt	ZINC000004228257	kuvan	-6.4	-6.5	-8.2	-7.03333	1.0116	fda_ligand_0258.pdbqt	ZINC000004228257	kuvan	-7.6	-7.5	-8	-7.7	0.264575	-7.36667	0.755425	-0.666667	241.251
fda_ligand_0259.pdbqt	ZINC000004228257	kuvan	-6.7	-6.6	-7.3	-6.86667	0.378594	fda_ligand_0259.pdbqt	ZINC000004228257	kuvan	-7.5	-7.6	-7.4	-7.5	0.1	-7.18333	0.426224	-0.633333	241.251
fda_ligand_0260.pdbqt	ZINC000004228257	kuvan	-6.4	-6.5	-7.7	-6.86667	0.723418	fda_ligand_0260.pdbqt	ZINC000004228257	kuvan	-7.2	-7	-7.6	-7.26667	0.305505	-7.06667	0.542832	-0.4	241.251
fda_ligand_0261.pdbqt	ZINC000003800706	citalopram	-5.9	-5.3	-6.5	-5.9	0.6	fda_ligand_0261.pdbqt	ZINC000003800706	citalopram	-5.7	-6.6	-5.8	-6.03333	0.493288	-5.96667	0.496655	-0.133333	324.399
fda_ligand_0262.pdbqt	ZINC000001530303	ilopan	-5.8	-5.9	-6.3	-6	0.264575	fda_ligand_0262.pdbqt	ZINC000001530303	ilopan	-6.1	-6.4	-6.4	-6.3	0.173205	-6.15	0.258844	-0.3	205.254
fda_ligand_0263.pdbqt	ZINC000001532517	pyruvate	-4.3	-4.4	-4.2	-4.3	0.1	fda_ligand_0263.pdbqt	ZINC000001532517	pyruvate	-4.4	-4.4	-4.5	-4.43333	0.057735	-4.36667	0.10328	-0.133333	88.062
fda_ligand_0264.pdbqt	ZINC000001532805	ghb	-4.5	-4.6	-4.7	-4.6	0.1	fda_ligand_0264.pdbqt	ZINC000001532805	ghb	-4.6	-4.6	-4.8	-4.66667	0.11547	-4.63333	0.10328	-0.0666667	104.105
fda_ligand_0265.pdbqt	ZINC000003807917	astenile	-6.9	-7.1	-7.2	-7.06667	0.152753	fda_ligand_0265.pdbqt	ZINC000003807917	astenile	-7	-7.1	-7.1	-7.06667	0.057735	-7.06667	0.10328	0	288.431
fda_ligand_0266.pdbqt	ZINC000003812851	enalaprilat	-6.8	-7	-7.9	-7.23333	0.585947	fda_ligand_0266.pdbqt	ZINC000003812851	enalaprilat	-7	-7.1	-7.2	-7.1	0.1	-7.16667	0.382971	0.133333	348.399
fda_ligand_0267.pdbqt	ZINC000003812851	enalaprilat	-6.8	-7.1	-6.9	-6.93333	0.152753	fda_ligand_0267.pdbqt	ZINC000003812851	enalaprilat	-7	-7.1	-7.3	-7.13333	0.152753	-7.03333	0.175119	-0.2	348.399
fda_ligand_0268.pdbqt	ZINC000003914810	degalol	-6.9	-7	-6.8	-6.9	0.1	fda_ligand_0268.pdbqt	ZINC000003914810	degalol	-6.9	-7.1	-7.3	-7.1	0.2	-7	0.178885	-0.2	392.58
fda_ligand_0269.pdbqt	ZINC000004658557	glypure	-4.5	-4.5	-4.2	-4.4	0.173205	fda_ligand_0269.pdbqt	ZINC000004658557	glypure	-4.6	-4.5	-4.7	-4.6	0.1	-4.5	0.167332	-0.2	76.051
fda_ligand_0270.pdbqt	ZINC000009212428	leucal	-7.9	-8	-7.9	-7.93333	0.057735	fda_ligand_0270.pdbqt	ZINC000009212428	leucal	-8.1	-8.4	-8.1	-8.2	0.173205	-8.06667	0.18619	-0.266667	473.446
fda_ligand_0271.pdbqt	ZINC000009212428	leucal	-7.9	-7.7	-8.1	-7.9	0.2	fda_ligand_0271.pdbqt	ZINC000009212428	leucal	-8	-8.1	-8.2	-8.1	0.1	-8	0.178885	-0.2	473.446
fda_ligand_0272.pdbqt	ZINC000009212428	leucal	-7.9	-7.6	-7.9	-7.8	0.173205	fda_ligand_0272.pdbqt	ZINC000009212428	leucal	-8	-8.1	-8.1	-8.06667	0.057735	-7.93333	0.18619	-0.266667	473.446
fda_ligand_0273.pdbqt	ZINC000013585233	sapropterin	-6.7	-6.9	-7.9	-7.16667	0.64291	fda_ligand_0273.pdbqt	ZINC000013585233	sapropterin	-7.1	-6.9	-7.2	-7.06667	0.152753	-7.11667	0.421505	0.1	241.251
fda_ligand_0274.pdbqt	ZINC000013585233	sapropterin	-7	-7.6	-7.3	-7.3	0.3	fda_ligand_0274.pdbqt	ZINC000013585233	sapropterin	-6.9	-7.4	-7.2	-7.16667	0.251661	-7.23333	0.258199	0.133333	241.251
fda_ligand_0275.pdbqt	ZINC000013585233	sapropterin	-6.9	-7.1	-7.6	-7.2	0.360555	fda_ligand_0275.pdbqt	ZINC000013585233	sapropterin	-6.8	-7.4	-7.2	-7.13333	0.305505	-7.16667	0.301109	0.0666667	241.251
fda_ligand_0276.pdbqt	ZINC000169621220	ZINC169621220	-7	-7.1	-7.1	-7.06667	0.057735	fda_ligand_0276.pdbqt	ZINC000169621220	ZINC169621220	-8	-8.6	-8.1	-8.23333	0.321455	-7.65	0.671565	-1.16667	665.733
fda_ligand_0277.pdbqt	ZINC000000001084	caffeine	-5.6	-5.9	-6	-5.83333	0.208167	fda_ligand_0277.pdbqt	ZINC000000001084	caffeine	-5.5	-5.7	-5.5	-5.56667	0.11547	-5.7	0.209762	0.266667	194.194
fda_ligand_0278.pdbqt	ZINC000000049153	thiamine	-6	-6.2	-6.6	-6.26667	0.305505	fda_ligand_0278.pdbqt	ZINC000000049153	thiamine	-6.4	-6.5	-6.5	-6.46667	0.057735	-6.36667	0.225093	-0.2	265.362
fda_ligand_0279.pdbqt	ZINC000100006770	vasc	-6	-6	-6.5	-6.16667	0.288675	fda_ligand_0279.pdbqt	ZINC000100006770	vasc	-6	-6.2	-6.2	-6.13333	0.11547	-6.15	0.197484	0.0333333	176.124
fda_ligand_0280.pdbqt	ZINC000002036848	riboflavin	-7.6	-9	-7.8	-8.13333	0.757188	fda_ligand_0280.pdbqt	ZINC000002036848	riboflavin	-7.5	-7.7	-7.6	-7.6	0.1	-7.86667	0.564506	0.533333	376.369
fda_ligand_0281.pdbqt	ZINC000002036848	riboflavin	-7.4	-8.7	-7.7	-7.93333	0.680686	fda_ligand_0281.pdbqt	ZINC000002036848	riboflavin	-7.9	-7.6	-7.4	-7.63333	0.251661	-7.78333	0.487511	0.3	376.369
fda_ligand_0282.pdbqt	ZINC000003830218	ampicillin	-6.8	-6.8	-7.1	-6.9	0.173205	fda_ligand_0282.pdbqt	ZINC000003830218	ampicillin	-7.2	-7.3	-7.4	-7.3	0.1	-7.1	0.252982	-0.4	349.412
fda_ligand_0283.pdbqt	ZINC000003830218	ampicillin	-6.8	-6.8	-6.9	-6.83333	0.057735	fda_ligand_0283.pdbqt	ZINC000003830218	ampicillin	-7.3	-7.2	-7.4	-7.3	0.1	-7.06667	0.265832	-0.466667	349.412
fda_ligand_0284.pdbqt	ZINC000003881958	danol	-6.7	-7	-7.3	-7	0.3	fda_ligand_0284.pdbqt	ZINC000003881958	danol	-7.6	-7.5	-7.7	-7.6	0.1	-7.3	0.384708	-0.6	337.463
fda_ligand_0285.pdbqt	ZINC000018043251	theophylline	-6.3	-6.4	-7	-6.56667	0.378594	fda_ligand_0285.pdbqt	ZINC000018043251	theophylline	-6.7	-6.5	-6.7	-6.63333	0.11547	-6.6	0.252982	-0.0666667	180.167
fda_ligand_0286.pdbqt	ZINC000034676245	d-cycloserine	-4.4	-4.4	-4.8	-4.53333	0.23094	fda_ligand_0286.pdbqt	ZINC000034676245	d-cycloserine	-4.7	-4.7	-4.7	-4.7	0	-4.61667	0.17224	-0.166667	102.093
fda_ligand_0287.pdbqt	ZINC000034676245	d-cycloserine	-4.4	-4.7	-5.3	-4.8	0.458258	fda_ligand_0287.pdbqt	ZINC000034676245	d-cycloserine	-4.9	-4.9	-5.1	-4.96667	0.11547	-4.88333	0.312517	-0.166667	102.093
fda_ligand_0288.pdbqt	ZINC000034676245	d-cycloserine	-4.4	-4.7	-5.3	-4.8	0.458258	fda_ligand_0288.pdbqt	ZINC000034676245	d-cycloserine	-4.9	-4.9	-5.1	-4.96667	0.11547	-4.88333	0.312517	-0.166667	102.093
fda_ligand_0289.pdbqt	ZINC000000002005	pza	-5.6	-5.6	-5.7	-5.63333	0.057735	fda_ligand_0289.pdbqt	ZINC000000002005	pza	-5.7	-5.7	-5.9	-5.76667	0.11547	-5.7	0.109545	-0.133333	123.115
fda_ligand_0290.pdbqt	ZINC000000000346	cuvposa	-6.1	-5.8	-6.9	-6.26667	0.568624	fda_ligand_0290.pdbqt	ZINC000000000346	cuvposa	-6.7	-7	-6.9	-6.86667	0.152753	-6.56667	0.496655	-0.6	318.437
fda_ligand_0291.pdbqt	ZINC000000000506	milnacipran	-5.3	-5.7	-6	-5.66667	0.351188	fda_ligand_0291.pdbqt	ZINC000000000506	milnacipran	-5.8	-5.6	-6.2	-5.86667	0.305505	-5.76667	0.314113	-0.2	246.354
fda_ligand_0292.pdbqt	ZINC000000004076	naratriptan	-6.4	-6.9	-7.4	-6.9	0.5	fda_ligand_0292.pdbqt	ZINC000000004076	naratriptan	-7	-7.5	-7.3	-7.26667	0.251661	-7.08333	0.407022	-0.366667	335.473
fda_ligand_0293.pdbqt	ZINC000000001899	penciclovir	-6.5	-6.8	-7.5	-6.93333	0.51316	fda_ligand_0293.pdbqt	ZINC000000001899	penciclovir	-7.4	-7.5	-6.6	-7.16667	0.493288	-7.05	0.467974	-0.233333	253.262
fda_ligand_0294.pdbqt	ZINC000000020231	apraclonidine	-6.1	-6.1	-6.1	-6.1	0	fda_ligand_0294.pdbqt	ZINC000000020231	apraclonidine	-6	-6.7	-6.1	-6.26667	0.378594	-6.18333	0.256255	-0.166667	245.113
fda_ligand_0295.pdbqt	ZINC000000020231	apraclonidine	-6.1	-6	-6.2	-6.1	0.1	fda_ligand_0295.pdbqt	ZINC000000020231	apraclonidine	-6.3	-7	-6.6	-6.63333	0.351188	-6.36667	0.37238	-0.533333	245.113
fda_ligand_0296.pdbqt	ZINC000000004840	arava	-6.6	-6.9	-6.6	-6.7	0.173205	fda_ligand_0296.pdbqt	ZINC000000004840	arava	-6.8	-6.9	-6.8	-6.83333	0.057735	-6.76667	0.136626	-0.133333	270.21
fda_ligand_0297.pdbqt	ZINC000000596731	tikosyn	-5.5	-4.8	-6.5	-5.6	0.8544	fda_ligand_0297.pdbqt	ZINC000000596731	tikosyn	-5.9	-5.7	-6.4	-6	0.360555	-5.8	0.626099	-0.4	441.575
fda_ligand_0298.pdbqt	ZINC000000596731	tikosyn	-5.3	-6.1	-5.5	-5.63333	0.416333	fda_ligand_0298.pdbqt	ZINC000000596731	tikosyn	-6.2	-5.8	-5.3	-5.76667	0.450925	-5.7	0.394968	-0.133333	441.575
fda_ligand_0299.pdbqt	ZINC000000896484	nexiclon	-5.8	-5.9	-6.1	-5.93333	0.152753	fda_ligand_0299.pdbqt	ZINC000000896484	nexiclon	-6	-6.6	-6.3	-6.3	0.3	-6.11667	0.292689	-0.366667	230.098
fda_ligand_0300.pdbqt	ZINC000000896484	nexiclon	-5.8	-5.7	-6.1	-5.86667	0.208167	fda_ligand_0300.pdbqt	ZINC000000896484	nexiclon	-6	-6.6	-6.3	-6.3	0.3	-6.08333	0.33116	-0.433333	230.098
fda_ligand_0301.pdbqt	ZINC000002570895	celebrex	-6.8	-6.8	-6.3	-6.63333	0.288675	fda_ligand_0301.pdbqt	ZINC000002570895	celebrex	-7.5	-7.4	-7.6	-7.5	0.1	-7.06667	0.51251	-0.866667	381.379
fda_ligand_0302.pdbqt	ZINC000000602632	intelence	-6.3	-6.5	-6.5	-6.43333	0.11547	fda_ligand_0302.pdbqt	ZINC000000602632	intelence	-6.5	-6.8	-6.8	-6.7	0.173205	-6.56667	0.196638	-0.266667	435.285
fda_ligand_0303.pdbqt	ZINC000084400879	nicardipine	-7.3	-5.9	-7	-6.73333	0.737111	fda_ligand_0303.pdbqt	ZINC000084400879	nicardipine	-6.7	-7	-6.9	-6.86667	0.152753	-6.8	0.481664	-0.133333	479.533
fda_ligand_0304.pdbqt	ZINC000084400879	nicardipine	-7.1	-6.9	-6.6	-6.86667	0.251661	fda_ligand_0304.pdbqt	ZINC000084400879	nicardipine	-6.8	-7	-7	-6.93333	0.11547	-6.9	0.178885	-0.0666667	479.533
fda_ligand_0305.pdbqt	ZINC000084400879	nicardipine	-7.3	-6.9	-6.8	-7	0.264575	fda_ligand_0305.pdbqt	ZINC000084400879	nicardipine	-6.8	-7	-7	-6.93333	0.11547	-6.96667	0.18619	0.0666667	479.533
fda_ligand_0306.pdbqt	ZINC000019796087	nicardipine	-5.9	-6.1	-6.2	-6.06667	0.152753	fda_ligand_0306.pdbqt	ZINC000019796087	nicardipine	-7	-6.8	-7.1	-6.96667	0.152753	-6.51667	0.511534	-0.9	479.533
fda_ligand_0307.pdbqt	ZINC000019796087	nicardipine	-6.2	-7.1	-7	-6.76667	0.493288	fda_ligand_0307.pdbqt	ZINC000019796087	nicardipine	-6.6	-6.9	-7	-6.83333	0.208167	-6.8	0.340588	-0.0666667	479.533
fda_ligand_0308.pdbqt	ZINC000019796087	nicardipine	-6	-7	-7.4	-6.8	0.72111	fda_ligand_0308.pdbqt	ZINC000019796087	nicardipine	-7.2	-6.9	-6.9	-7	0.173205	-6.9	0.481664	-0.2	479.533
fda_ligand_0309.pdbqt	ZINC000000538275	raloxifene	-7.2	-7	-7	-7.06667	0.11547	fda_ligand_0309.pdbqt	ZINC000000538275	raloxifene	-7.3	-7.2	-7.2	-7.23333	0.057735	-7.15	0.122474	-0.166667	473.594
fda_ligand_0310.pdbqt	ZINC000000538275	raloxifene	-7.1	-7.1	-7	-7.06667	0.057735	fda_ligand_0310.pdbqt	ZINC000000538275	raloxifene	-6.9	-6.7	-7.3	-6.96667	0.305505	-7.01667	0.204124	0.1	473.594
fda_ligand_0311.pdbqt	ZINC000000596881	econazole	-6.2	-5.7	-7.3	-6.4	0.818535	fda_ligand_0311.pdbqt	ZINC000000596881	econazole	-6.3	-6.4	-6.2	-6.3	0.1	-6.35	0.524404	0.1	381.69
fda_ligand_0312.pdbqt	ZINC000000596881	econazole	-6.2	-5.7	-7.5	-6.46667	0.929157	fda_ligand_0312.pdbqt	ZINC000000596881	econazole	-6.8	-6.1	-6.1	-6.33333	0.404145	-6.4	0.644981	0.133333	381.69
fda_ligand_0313.pdbqt	ZINC000012414057	methylene blue	-5.4	-5.5	-6	-5.63333	0.321455	fda_ligand_0313.pdbqt	ZINC000012414057	methylene blue	-6.6	-6.4	-6.7	-6.56667	0.152753	-6.1	0.55857	-0.933333	284.408
fda_ligand_0314.pdbqt	ZINC000000003876	ambien	-6	-6	-6.6	-6.2	0.34641	fda_ligand_0314.pdbqt	ZINC000000003876	ambien	-6.7	-6.9	-6.9	-6.83333	0.11547	-6.51667	0.416733	-0.633333	307.397
fda_ligand_0315.pdbqt	ZINC000000009342	desvenlafaxine	-5.9	-5.9	-6.8	-6.2	0.519615	fda_ligand_0315.pdbqt	ZINC000000009342	desvenlafaxine	-5.8	-5.9	-5.9	-5.86667	0.057735	-6.03333	0.377712	0.333333	263.381
fda_ligand_0316.pdbqt	ZINC000000009342	desvenlafaxine	-5.7	-5.9	-7	-6.2	0.7	fda_ligand_0316.pdbqt	ZINC000000009342	desvenlafaxine	-6.2	-5.9	-5.9	-6	0.173205	-6.1	0.469042	0.2	263.381
fda_ligand_0317.pdbqt	ZINC000003079342	carbachol	-5.8	-5.7	-5.4	-5.63333	0.208167	fda_ligand_0317.pdbqt	ZINC000003079342	carbachol	-5.6	-5.7	-5.6	-5.63333	0.057735	-5.63333	0.136626	0	147.198
fda_ligand_0318.pdbqt	ZINC000000004319	dilevalol	-6	-5.7	-7.5	-6.4	0.964365	fda_ligand_0318.pdbqt	ZINC000000004319	dilevalol	-7	-7.3	-7	-7.1	0.173205	-6.75	0.728697	-0.7	328.412
fda_ligand_0319.pdbqt	ZINC000000004319	dilevalol	-6.4	-6.1	-7.4	-6.63333	0.680686	fda_ligand_0319.pdbqt	ZINC000000004319	dilevalol	-6.5	-7.2	-6.1	-6.6	0.556776	-6.61667	0.556477	0.0333333	328.412
fda_ligand_0320.pdbqt	ZINC000000074836	ephedrine	-4.8	-4.9	-6	-5.23333	0.665833	fda_ligand_0320.pdbqt	ZINC000000074836	ephedrine	-4.9	-5.5	-5.5	-5.3	0.34641	-5.26667	0.476095	-0.0666667	165.236
fda_ligand_0321.pdbqt	ZINC000000601301	bhft	-7.7	-7.9	-8	-7.86667	0.152753	fda_ligand_0321.pdbqt	ZINC000000601301	bhft	-8	-8.1	-8.3	-8.13333	0.152753	-8	0.2	-0.266667	421.422
fda_ligand_0322.pdbqt	ZINC000004468778	cefixime	-7.5	-7.6	-8.3	-7.8	0.43589	fda_ligand_0322.pdbqt	ZINC000004468778	cefixime	-8.2	-8.3	-8.7	-8.4	0.264575	-8.1	0.460435	-0.6	453.458
fda_ligand_0323.pdbqt	ZINC000004474405	latisse	-5.7	-5.6	-6.4	-5.9	0.43589	fda_ligand_0323.pdbqt	ZINC000004474405	latisse	-6.2	-5.9	-6.8	-6.3	0.458258	-6.1	0.45607	-0.4	415.574
fda_ligand_0324.pdbqt	ZINC000004693575	omeprazole	-6.6	-6.6	-6.6	-6.6	0	fda_ligand_0324.pdbqt	ZINC000004693575	omeprazole	-6.8	-6.7	-6.7	-6.73333	0.057735	-6.66667	0.0816497	-0.133333	345.424
fda_ligand_0325.pdbqt	ZINC000004693575	omeprazole	-6.2	-6.1	-6.8	-6.36667	0.378594	fda_ligand_0325.pdbqt	ZINC000004693575	omeprazole	-6.7	-7	-6.9	-6.86667	0.152753	-6.61667	0.376386	-0.5	345.424
fda_ligand_0326.pdbqt	ZINC000000020228	bupropion	-5.3	-5.2	-5.3	-5.26667	0.057735	fda_ligand_0326.pdbqt	ZINC000000020228	bupropion	-5.4	-5.7	-5.7	-5.6	0.173205	-5.43333	0.216025	-0.333333	239.746
fda_ligand_0327.pdbqt	ZINC000000020228	bupropion	-5.4	-5.6	-5.5	-5.5	0.1	fda_ligand_0327.pdbqt	ZINC000000020228	bupropion	-5.8	-5.9	-5.9	-5.86667	0.057735	-5.68333	0.213698	-0.366667	239.746
fda_ligand_0328.pdbqt	ZINC000001542930	cesamet	-6.6	-6.4	-7	-6.66667	0.305505	fda_ligand_0328.pdbqt	ZINC000001542930	cesamet	-7.1	-7.7	-7.6	-7.46667	0.321455	-7.06667	0.520256	-0.8	372.549
fda_ligand_0329.pdbqt	ZINC000001550477	lapatinib	-7	-7.4	-7.6	-7.33333	0.305505	fda_ligand_0329.pdbqt	ZINC000001550477	lapatinib	-7.5	-7.6	-7.3	-7.46667	0.152753	-7.4	0.228035	-0.133333	581.069
fda_ligand_0330.pdbqt	ZINC000001542113	vilazodone	-6.9	-7.3	-7.7	-7.3	0.4	fda_ligand_0330.pdbqt	ZINC000001542113	vilazodone	-8.4	-8.7	-8.9	-8.66667	0.251661	-7.98333	0.806019	-1.36667	441.535
fda_ligand_0331.pdbqt	ZINC000001542113	vilazodone	-8	-7.2	-7.6	-7.6	0.4	fda_ligand_0331.pdbqt	ZINC000001542113	vilazodone	-8.4	-8.6	-8.5	-8.5	0.1	-8.05	0.557674	-0.9	441.535
fda_ligand_0332.pdbqt	ZINC000000968310	esmirtazapine	-5.9	-6.5	-6.5	-6.3	0.34641	fda_ligand_0332.pdbqt	ZINC000000968310	esmirtazapine	-6.5	-6.8	-6.7	-6.66667	0.152753	-6.48333	0.312517	-0.366667	265.36
fda_ligand_0333.pdbqt	ZINC000000968310	esmirtazapine	-6.1	-6.2	-6.1	-6.13333	0.057735	fda_ligand_0333.pdbqt	ZINC000000968310	esmirtazapine	-6.6	-6.6	-6.7	-6.63333	0.057735	-6.38333	0.278687	-0.5	265.36
fda_ligand_0334.pdbqt	ZINC000000968310	esmirtazapine	-5.9	-6.5	-6.5	-6.3	0.34641	fda_ligand_0334.pdbqt	ZINC000000968310	esmirtazapine	-6.4	-6.8	-6.7	-6.63333	0.208167	-6.46667	0.314113	-0.333333	265.36
fda_ligand_0335.pdbqt	ZINC000242437511	ZINC242437511	-5.4	-5.7	-6.1	-5.73333	0.351188	fda_ligand_0335.pdbqt	ZINC000242437511	ZINC242437511	-6.8	-5.8	-7.1	-6.56667	0.680686	-6.15	0.665582	-0.833333	477.603
fda_ligand_0336.pdbqt	ZINC000245204949	ZINC245204949	-6.9	-7.2	-7.5	-7.2	0.3	fda_ligand_0336.pdbqt	ZINC000245204949	ZINC245204949	-7.6	-8.1	-8	-7.9	0.264575	-7.55	0.459347	-0.7	356.442
fda_ligand_0337.pdbqt	ZINC000003875368	nitrofurantoin	-6.6	-6.7	-7.8	-7.03333	0.665833	fda_ligand_0337.pdbqt	ZINC000003875368	nitrofurantoin	-7.2	-7.2	-7.3	-7.23333	0.057735	-7.13333	0.436654	-0.2	238.159
fda_ligand_0338.pdbqt	ZINC000003875368	nitrofurantoin	-6.5	-7.1	-7.9	-7.16667	0.702377	fda_ligand_0338.pdbqt	ZINC000003875368	nitrofurantoin	-7.3	-7.2	-7.2	-7.23333	0.057735	-7.2	0.447214	-0.0666667	238.159
fda_ligand_0339.pdbqt	ZINC000148723177	ZINC148723177	-6.4	-6.7	-6.3	-6.46667	0.208167	fda_ligand_0339.pdbqt	ZINC000148723177	ZINC148723177	-5.9	-5.9	-5.9	-5.9	0	-6.18333	0.337145	0.566667	584.105
fda_ligand_0340.pdbqt	ZINC000148723177	ZINC148723177	-6.2	-6.5	-6.2	-6.3	0.173205	fda_ligand_0340.pdbqt	ZINC000148723177	ZINC148723177	-5.9	-5.9	-6.2	-6	0.173205	-6.15	0.225832	0.3	584.105
fda_ligand_0341.pdbqt	ZINC000004641374	doxercalciferol	-6.6	-6.7	-6.7	-6.66667	0.057735	fda_ligand_0341.pdbqt	ZINC000004641374	doxercalciferol	-7.3	-7.4	-7.5	-7.4	0.1	-7.03333	0.408248	-0.733333	412.658
fda_ligand_0342.pdbqt	ZINC000252679615	ZINC252679615	-6.5	-6.5	-6.6	-6.53333	0.057735	fda_ligand_0342.pdbqt	ZINC000252679615	ZINC252679615	-6.9	-7	-7	-6.96667	0.057735	-6.75	0.242899	-0.433333	314.257
fda_ligand_0343.pdbqt	ZINC000252679615	ZINC252679615	-6.5	-6.5	-6.7	-6.56667	0.11547	fda_ligand_0343.pdbqt	ZINC000252679615	ZINC252679615	-7	-7	-7	-7	0	-6.78333	0.248328	-0.433333	314.257
fda_ligand_0344.pdbqt	ZINC000253530025	ZINC253530025	-6	-6.2	-6.6	-6.26667	0.305505	fda_ligand_0344.pdbqt	ZINC000253530025	ZINC253530025	-6.2	-6.5	-6.5	-6.4	0.173205	-6.33333	0.233809	-0.133333	312.453
fda_ligand_0345.pdbqt	ZINC000013512456	teriflunomide	-5.7	-6.6	-6.3	-6.2	0.458258	fda_ligand_0345.pdbqt	ZINC000013512456	teriflunomide	-6.2	-6.4	-6.2	-6.26667	0.11547	-6.23333	0.301109	-0.0666667	270.21
fda_ligand_0346.pdbqt	ZINC000013512456	teriflunomide	-6.6	-6.8	-7.1	-6.83333	0.251661	fda_ligand_0346.pdbqt	ZINC000013512456	teriflunomide	-6.4	-6.7	-6.6	-6.56667	0.152753	-6.7	0.236643	0.266667	270.21
fda_ligand_0347.pdbqt	ZINC000022065398	ZINC22065398	-6.7	-6.6	-6.7	-6.66667	0.057735	fda_ligand_0347.pdbqt	ZINC000022065398	ZINC22065398	-6.5	-6.6	-6.8	-6.63333	0.152753	-6.65	0.104881	0.0333333	312.453
fda_ligand_0348.pdbqt	ZINC000031274852	ZINC31274852	-7.2	-7	-6.8	-7	0.2	fda_ligand_0348.pdbqt	ZINC000031274852	ZINC31274852	-7.4	-7.8	-7.7	-7.63333	0.208167	-7.31667	0.392003	-0.633333	348.446
fda_ligand_0349.pdbqt	ZINC000031274852	ZINC31274852	-7.2	-7.1	-6.9	-7.06667	0.152753	fda_ligand_0349.pdbqt	ZINC000031274852	ZINC31274852	-7.7	-8	-8	-7.9	0.173205	-7.48333	0.479236	-0.833333	348.446
fda_ligand_0350.pdbqt	ZINC000040430143	olaparib	-8	-8.2	-7.8	-8	0.2	fda_ligand_0350.pdbqt	ZINC000040430143	olaparib	-7.9	-8.2	-8.1	-8.06667	0.152753	-8.03333	0.163299	-0.0666667	434.471
fda_ligand_0351.pdbqt	ZINC000100013130	midostaurin	-7.1	-7.3	-7.5	-7.3	0.2	fda_ligand_0351.pdbqt	ZINC000100013130	midostaurin	-7.5	-7.9	-7.8	-7.73333	0.208167	-7.51667	0.299444	-0.433333	570.649
fda_ligand_0352.pdbqt	ZINC000026664090	sqv	-7.4	-7.5	-7.5	-7.46667	0.057735	fda_ligand_0352.pdbqt	ZINC000026664090	sqv	-6.9	-8	-7.1	-7.33333	0.585947	-7.4	0.379473	0.133333	670.855
fda_ligand_0353.pdbqt	ZINC000026664090	sqv	-6.1	-6.2	-7	-6.43333	0.493288	fda_ligand_0353.pdbqt	ZINC000026664090	sqv	-6.2	-7.7	-6.4	-6.76667	0.814453	-6.6	0.629285	-0.333333	670.855
fda_ligand_0354.pdbqt	ZINC000026664090	sqv	-6	-6	-6	-6	0	fda_ligand_0354.pdbqt	ZINC000026664090	sqv	-6.1	-7.1	-7.5	-6.9	0.72111	-6.45	0.671565	-0.9	670.855
fda_ligand_0355.pdbqt	ZINC000002000707	lodoxamide	-7.2	-7.3	-7.9	-7.46667	0.378594	fda_ligand_0355.pdbqt	ZINC000002000707	lodoxamide	-7.2	-6.8	-7.2	-7.06667	0.23094	-7.26667	0.355903	0.4	311.637
fda_ligand_0356.pdbqt	ZINC000026985532	sqv	-8	-7.5	-7.5	-7.66667	0.288675	fda_ligand_0356.pdbqt	ZINC000026985532	sqv	-7.4	-7.4	-7.5	-7.43333	0.057735	-7.55	0.225832	0.233333	670.855
fda_ligand_0357.pdbqt	ZINC000026985532	sqv	-6.6	-6	-8	-6.86667	1.02632	fda_ligand_0357.pdbqt	ZINC000026985532	sqv	-7.2	-7.5	-7.4	-7.36667	0.152753	-7.11667	0.711102	-0.5	670.855
fda_ligand_0358.pdbqt	ZINC000026985532	sqv	-6.8	-7.2	-7.8	-7.26667	0.503322	fda_ligand_0358.pdbqt	ZINC000026985532	sqv	-7.1	-7.2	-7.3	-7.2	0.1	-7.23333	0.326599	0.0666667	670.855
fda_ligand_0359.pdbqt	ZINC000003874498	anandron	-7	-6.6	-6.4	-6.66667	0.305505	fda_ligand_0359.pdbqt	ZINC000003874498	anandron	-7.3	-7.2	-7.5	-7.33333	0.152753	-7	0.424264	-0.666667	317.223
fda_ligand_0360.pdbqt	ZINC000001530639	fluvastatin	-6.1	-5.8	-5.9	-5.93333	0.152753	fda_ligand_0360.pdbqt	ZINC000001530639	fluvastatin	-6.9	-7.3	-7.3	-7.16667	0.23094	-6.55	0.697854	-1.23333	411.473
fda_ligand_0361.pdbqt	ZINC000242437514	ZINC242437514	-5.8	-6	-5.9	-5.9	0.1	fda_ligand_0361.pdbqt	ZINC000242437514	ZINC242437514	-6.2	-7.1	-6.5	-6.6	0.458258	-6.25	0.484768	-0.7	477.603
fda_ligand_0362.pdbqt	ZINC000003830391	cefadroxil	-7.1	-7.2	-7.9	-7.4	0.43589	fda_ligand_0362.pdbqt	ZINC000003830391	cefadroxil	-7.6	-7.4	-7.8	-7.6	0.2	-7.5	0.32249	-0.2	363.395
fda_ligand_0363.pdbqt	ZINC000003830391	cefadroxil	-7.1	-7.2	-7.9	-7.4	0.43589	fda_ligand_0363.pdbqt	ZINC000003830391	cefadroxil	-7.4	-7.2	-7.6	-7.4	0.2	-7.4	0.303315	0	363.395
fda_ligand_0364.pdbqt	ZINC000003873921	picosulfuric acid	-7.3	-6.3	-7.4	-7	0.608276	fda_ligand_0364.pdbqt	ZINC000003873921	picosulfuric acid	-7.5	-7.8	-7.7	-7.66667	0.152753	-7.33333	0.539135	-0.666667	437.451
fda_ligand_0365.pdbqt	ZINC000004217732	lubiprostone	-6.1	-6.3	-6.5	-6.3	0.2	fda_ligand_0365.pdbqt	ZINC000004217732	lubiprostone	-7	-7	-6.6	-6.86667	0.23094	-6.58333	0.365605	-0.566667	390.467
fda_ligand_0366.pdbqt	ZINC000006745272	stivarga	-8.2	-8.2	-7.9	-8.1	0.173205	fda_ligand_0366.pdbqt	ZINC000006745272	stivarga	-9.2	-8.5	-9	-8.9	0.360555	-8.5	0.505964	-0.8	482.821
fda_ligand_0367.pdbqt	ZINC000253476025	ZINC253476025	-5.9	-5.6	-6.6	-6.03333	0.51316	fda_ligand_0367.pdbqt	ZINC000253476025	ZINC253476025	-5.9	-6.6	-6.2	-6.23333	0.351188	-6.13333	0.408248	-0.2	332.464
fda_ligand_0368.pdbqt	ZINC000018203737	edaravone	-5.3	-5.5	-6.9	-5.9	0.87178	fda_ligand_0368.pdbqt	ZINC000018203737	edaravone	-5.6	-5.5	-6	-5.7	0.264575	-5.8	0.586515	0.2	174.203
fda_ligand_0369.pdbqt	ZINC000018203737	edaravone	-5.4	-5.5	-6.4	-5.76667	0.550757	fda_ligand_0369.pdbqt	ZINC000018203737	edaravone	-5.7	-5.8	-5.8	-5.76667	0.057735	-5.76667	0.350238	0	174.203
fda_ligand_0370.pdbqt	ZINC000000020220	ciprofloxacin	-6.9	-6.9	-6.6	-6.8	0.173205	fda_ligand_0370.pdbqt	ZINC000000020220	ciprofloxacin	-6.5	-7.3	-7.2	-7	0.43589	-6.9	0.316228	-0.2	331.347
fda_ligand_0371.pdbqt	ZINC000000020220	ciprofloxacin	-6.9	-6.9	-7	-6.93333	0.057735	fda_ligand_0371.pdbqt	ZINC000000020220	ciprofloxacin	-6.5	-7.3	-6.7	-6.83333	0.416333	-6.88333	0.271416	0.1	331.347
fda_ligand_0372.pdbqt	ZINC000000057435	oxymetazoline	-5.7	-5.7	-6.2	-5.86667	0.288675	fda_ligand_0372.pdbqt	ZINC000000057435	oxymetazoline	-6.2	-6.4	-6.5	-6.36667	0.152753	-6.11667	0.343026	-0.5	260.381
fda_ligand_0373.pdbqt	ZINC000000057534	xylometazoline	-5.5	-5.7	-6.2	-5.8	0.360555	fda_ligand_0373.pdbqt	ZINC000000057534	xylometazoline	-6	-6.1	-6.2	-6.1	0.1	-5.95	0.288097	-0.3	244.382
fda_ligand_0374.pdbqt	ZINC000000968273	trihexyphenidyl	-5.8	-5.9	-6.2	-5.96667	0.208167	fda_ligand_0374.pdbqt	ZINC000000968273	trihexyphenidyl	-6	-6.2	-6	-6.06667	0.11547	-6.01667	0.160208	-0.1	301.474
fda_ligand_0375.pdbqt	ZINC000003831490	azulfidine	-6.8	-7.5	-7.3	-7.2	0.360555	fda_ligand_0375.pdbqt	ZINC000003831490	azulfidine	-7.4	-7.2	-7.2	-7.26667	0.11547	-7.23333	0.242212	-0.0666667	398.4
fda_ligand_0376.pdbqt	ZINC000003831490	azulfidine	-7.2	-7.3	-7.1	-7.2	0.1	fda_ligand_0376.pdbqt	ZINC000003831490	azulfidine	-7.1	-7.6	-7.2	-7.3	0.264575	-7.25	0.187083	-0.1	398.4
fda_ligand_0377.pdbqt	ZINC000118912450	oxymetholone	-7	-6.9	-7.3	-7.06667	0.208167	fda_ligand_0377.pdbqt	ZINC000118912450	oxymetholone	-7.8	-8	-8.1	-7.96667	0.152753	-7.51667	0.519294	-0.9	332.484
fda_ligand_0378.pdbqt	ZINC000003806413	r340	-6.9	-7	-6.6	-6.83333	0.208167	fda_ligand_0378.pdbqt	ZINC000003806413	r340	-6.7	-7.1	-6.8	-6.86667	0.208167	-6.85	0.187083	-0.0333333	359.354
fda_ligand_0379.pdbqt	ZINC000003806413	r340	-6.1	-6.4	-6.3	-6.26667	0.152753	fda_ligand_0379.pdbqt	ZINC000003806413	r340	-6.8	-7.1	-6.9	-6.93333	0.152753	-6.6	0.389872	-0.666667	359.354
fda_ligand_0380.pdbqt	ZINC000000010164	cevimeline	-5.1	-5.2	-5.4	-5.23333	0.152753	fda_ligand_0380.pdbqt	ZINC000000010164	cevimeline	-5.6	-5.8	-5.8	-5.73333	0.11547	-5.48333	0.299444	-0.5	199.319
fda_ligand_0381.pdbqt	ZINC000000010164	cevimeline	-5	-5.2	-5.4	-5.2	0.2	fda_ligand_0381.pdbqt	ZINC000000010164	cevimeline	-5.6	-5.8	-5.8	-5.73333	0.11547	-5.46667	0.326599	-0.533333	199.319
fda_ligand_0382.pdbqt	ZINC000012484958	retin-a	-6.2	-6.1	-6.2	-6.16667	0.057735	fda_ligand_0382.pdbqt	ZINC000012484958	retin-a	-6.2	-6.3	-6.3	-6.26667	0.057735	-6.21667	0.0752773	-0.1	300.442
fda_ligand_0383.pdbqt	ZINC000019632706	sular	-6.4	-6.2	-6.6	-6.4	0.2	fda_ligand_0383.pdbqt	ZINC000019632706	sular	-6.5	-6.4	-6.5	-6.46667	0.057735	-6.43333	0.136626	-0.0666667	388.42
fda_ligand_0384.pdbqt	ZINC000000591993	sular	-6.8	-6.8	-7.4	-7	0.34641	fda_ligand_0384.pdbqt	ZINC000000591993	sular	-6.2	-6	-6.8	-6.33333	0.416333	-6.66667	0.500666	0.666667	388.42
fda_ligand_0385.pdbqt	ZINC000003920719	atorvastatin	-7.3	-7.4	-6.4	-7.03333	0.550757	fda_ligand_0385.pdbqt	ZINC000003920719	atorvastatin	-7.6	-7.9	-7.9	-7.8	0.173205	-7.41667	0.556477	-0.766667	558.65
fda_ligand_0386.pdbqt	ZINC000004083606	hydroxyprogesterone	-6.3	-6.3	-7	-6.53333	0.404145	fda_ligand_0386.pdbqt	ZINC000004083606	hydroxyprogesterone	-7.2	-7.5	-7.6	-7.43333	0.208167	-6.98333	0.570672	-0.9	428.613
fda_ligand_0387.pdbqt	ZINC000005224188	dmso	-2.6	-2.6	-2.9	-2.7	0.173205	fda_ligand_0387.pdbqt	ZINC000005224188	dmso	-2.7	-2.9	-2.7	-2.76667	0.11547	-2.73333	0.136626	-0.0666667	78.136
fda_ligand_0388.pdbqt	ZINC000013545636	pentobarbital	-6.7	-6.9	-6.7	-6.76667	0.11547	fda_ligand_0388.pdbqt	ZINC000013545636	pentobarbital	-6.8	-6.9	-6.9	-6.86667	0.057735	-6.81667	0.0983192	-0.1	226.276
fda_ligand_0389.pdbqt	ZINC000013545636	pentobarbital	-6.7	-6.9	-6.7	-6.76667	0.11547	fda_ligand_0389.pdbqt	ZINC000013545636	pentobarbital	-6.8	-6.9	-6.9	-6.86667	0.057735	-6.81667	0.0983192	-0.1	226.276
fda_ligand_0390.pdbqt	ZINC000019796168	sildenafil	-6.9	-7.4	-7	-7.1	0.264575	fda_ligand_0390.pdbqt	ZINC000019796168	sildenafil	-7.9	-7.5	-8	-7.8	0.264575	-7.45	0.450555	-0.7	474.587
fda_ligand_0391.pdbqt	ZINC000019796168	sildenafil	-7.3	-7.4	-7	-7.23333	0.208167	fda_ligand_0391.pdbqt	ZINC000019796168	sildenafil	-7.9	-7.3	-8	-7.73333	0.378594	-7.48333	0.386868	-0.5	474.587
fda_ligand_0392.pdbqt	ZINC000019796168	sildenafil	-7.2	-7.5	-7.4	-7.36667	0.152753	fda_ligand_0392.pdbqt	ZINC000019796168	sildenafil	-7.8	-6.9	-8.1	-7.6	0.6245	-7.48333	0.426224	-0.233333	474.587
fda_ligand_0393.pdbqt	ZINC000003782599	proscar	-6.8	-6.8	-6.9	-6.83333	0.057735	fda_ligand_0393.pdbqt	ZINC000003782599	proscar	-7	-7.3	-7.2	-7.16667	0.152753	-7	0.209762	-0.333333	372.553
fda_ligand_0394.pdbqt	ZINC000000075126	zofran	-6.9	-7	-6.9	-6.93333	0.057735	fda_ligand_0394.pdbqt	ZINC000000075126	zofran	-7	-7.2	-7.2	-7.13333	0.11547	-7.03333	0.136626	-0.2	293.37
fda_ligand_0395.pdbqt	ZINC000000075126	zofran	-6.9	-6.8	-6.8	-6.83333	0.057735	fda_ligand_0395.pdbqt	ZINC000000075126	zofran	-7.3	-7.5	-7.5	-7.43333	0.11547	-7.13333	0.338625	-0.6	293.37
fda_ligand_0396.pdbqt	ZINC000003931840	altabax	-6.3	-6.3	-6.1	-6.23333	0.11547	fda_ligand_0396.pdbqt	ZINC000003931840	altabax	-7.1	-6.7	-7.2	-7	0.264575	-6.61667	0.457894	-0.766667	517.776
fda_ligand_0397.pdbqt	ZINC000003931840	altabax	-6.6	-6.3	-6.4	-6.43333	0.152753	fda_ligand_0397.pdbqt	ZINC000003931840	altabax	-7.3	-7.1	-7.5	-7.3	0.2	-6.86667	0.500666	-0.866667	517.776
fda_ligand_0398.pdbqt	ZINC000009302201	retin-a	-6	-6.1	-6.2	-6.1	0.1	fda_ligand_0398.pdbqt	ZINC000009302201	retin-a	-5.8	-6	-6.3	-6.03333	0.251661	-6.06667	0.175119	0.0666667	300.442
fda_ligand_0399.pdbqt	ZINC000013818943	lexiscan	-8	-8.2	-7.6	-7.93333	0.305505	fda_ligand_0399.pdbqt	ZINC000013818943	lexiscan	-7.6	-8.2	-7.7	-7.83333	0.321455	-7.88333	0.285774	0.1	390.36
fda_ligand_0400.pdbqt	ZINC000022448983	bosulif	-6.1	-6.6	-6.5	-6.4	0.264575	fda_ligand_0400.pdbqt	ZINC000022448983	bosulif	-6.6	-6.9	-6.8	-6.76667	0.152753	-6.58333	0.278687	-0.366667	530.456
fda_ligand_0401.pdbqt	ZINC000022448983	bosulif	-5.8	-6.2	-6.6	-6.2	0.4	fda_ligand_0401.pdbqt	ZINC000022448983	bosulif	-6.7	-6.6	-6.8	-6.7	0.1	-6.45	0.378153	-0.5	530.456
fda_ligand_0402.pdbqt	ZINC000022448983	bosulif	-5.7	-6.5	-6	-6.06667	0.404145	fda_ligand_0402.pdbqt	ZINC000022448983	bosulif	-6.6	-6.9	-6.7	-6.73333	0.152753	-6.4	0.45607	-0.666667	530.456
fda_ligand_0403.pdbqt	ZINC000000968328	rosiglitazone	-6.3	-6.2	-6.1	-6.2	0.1	fda_ligand_0403.pdbqt	ZINC000000968328	rosiglitazone	-6.4	-6.5	-6.5	-6.46667	0.057735	-6.33333	0.163299	-0.266667	357.435
fda_ligand_0404.pdbqt	ZINC000000968328	rosiglitazone	-5.9	-6.3	-7.5	-6.56667	0.832666	fda_ligand_0404.pdbqt	ZINC000000968328	rosiglitazone	-6.8	-7.2	-7.1	-7.03333	0.208167	-6.8	0.6	-0.466667	357.435
fda_ligand_0405.pdbqt	ZINC000001530886	ZINC1530886	-7.4	-7.6	-7.4	-7.46667	0.11547	fda_ligand_0405.pdbqt	ZINC000001530886	ZINC1530886	-7.7	-8.3	-8	-8	0.3	-7.73333	0.355903	-0.533333	514.629
fda_ligand_0406.pdbqt	ZINC000001530886	ZINC1530886	-7.1	-7.4	-7.3	-7.26667	0.152753	fda_ligand_0406.pdbqt	ZINC000001530886	ZINC1530886	-8	-8.3	-8.4	-8.23333	0.208167	-7.75	0.554076	-0.966667	514.629
fda_ligand_0407.pdbqt	ZINC000002020233	efv	-7.5	-7.7	-7.7	-7.63333	0.11547	fda_ligand_0407.pdbqt	ZINC000002020233	efv	-7.7	-7.3	-7.5	-7.5	0.2	-7.56667	0.163299	0.133333	315.678
[truncated: 1,708 more rows]
