# Supplementary material for: Virtual Screening for FDA-Approved Drugs That Selectively Inhibit Arginase Type 1 and 2
Source: Molecules. 2022 Aug 12;27(16):5134. doi: 10.3390/molecules27165134 (PMC9416497; doi:10.3390/molecules27165134)
Supplement: Supplementary file 1 [file molecules-27-05134-s001.zip › Table S4.xlsx]

## Sheet: top_15_drug_both
LIGAND_NAME	ZINC_ID	Drug_name	4hww	4hxq	3sjt	Average	Standard_deviation	LIGAND_NAME	ZINC_ID	Drug_name	4hze	4i06	4ixu	Average	Standard_deviation	Total average	delta _delta_G	Disease_area	Drug_class
fda_ligand_1237.pdbqt	ZINC000003978005	dihydroergotamine	-8.3	-8.5	-8.4	-8.4	0.1	fda_ligand_1237.pdbqt	ZINC000003978005	dihydroergotamine	-8.6	-9.5	-9.6	-9.23333	0.550757	-8.81667	-0.833333	migraine headaches	ergot alkaloids
fda_ligand_1666.pdbqt	ZINC000169289767	trypan blue	-8.2	-9	-8.3	-8.5	0.43589	fda_ligand_1666.pdbqt	ZINC000169289767	trypan blue	-8.2	-8.8	-10.1	-9.03333	0.971253	-8.76667	-0.533333	opthalmic surgery	dye
fda_ligand_0085.pdbqt	ZINC000004212809	deflazacort	-8.5	-8.8	-8.7	-8.66667	0.152753	fda_ligand_0085.pdbqt	ZINC000004212809	deflazacort	-8.5	-8.9	-8.8	-8.73333	0.208167	-8.7	-0.0666667	anti-inflammatory and immunomodulatory agent	corticosteroid
fda_ligand_0132.pdbqt	ZINC000052955754	ergotamine	-8.7	-8.4	-8.5	-8.53333	0.152753	fda_ligand_0132.pdbqt	ZINC000052955754	ergotamine	-8.5	-9.1	-9	-8.86667	0.321455	-8.7	-0.333333	migraine headaches	ergot alkaloids
fda_ligand_1202.pdbqt	ZINC000064033452	lumacaftor	-8.2	-8.6	-8.5	-8.43333	0.208167	fda_ligand_1202.pdbqt	ZINC000064033452	lumacaftor	-8.9	-8.9	-9.1	-8.96667	0.11547	-8.7	-0.533333	cystic fibrosis	protein-folding chaperone
fda_ligand_1496.pdbqt	ZINC000003927870	fludarabine	-8.5	-8.6	-8.4	-8.5	0.1	fda_ligand_1496.pdbqt	ZINC000003927870	fludarabine	-8.7	-9	-8.9	-8.86667	0.152753	-8.68333	-0.366667	chronic lymphocytic leukaemia (CLL)	chemotherapy
fda_ligand_1802.pdbqt	ZINC000014210876	eluxadoline	-8.7	-8.8	-8.6	-8.7	0.1	fda_ligand_1802.pdbqt	ZINC000014210876	eluxadoline	-8.8	-8.6	-8.4	-8.6	0.2	-8.65	0.1	IBS-D, diarrhea	mu-opioid receptor agonists
fda_ligand_0945.pdbqt	ZINC000004097286	budesonide	-8.2	-8.6	-8.5	-8.43333	0.208167	fda_ligand_0945.pdbqt	ZINC000004097286	budesonide	-8.8	-8.9	-8.8	-8.83333	0.057735	-8.63333	-0.4	Crohn's disease, inflammation, IgA nephropathy	corticosteroid
fda_ligand_1686.pdbqt	ZINC000003807172	argatroban	-8.6	-7.7	-8	-8.1	0.458258	fda_ligand_1686.pdbqt	ZINC000003807172	argatroban	-8.8	-9.1	-9	-8.96667	0.152753	-8.53333	-0.866667	Thrombocytopenia, Percutaneous Coronary Intervention	Anticoagulants
fda_ligand_2063.pdbqt	ZINC000003782818	atacand	-8.2	-8.2	-8.3	-8.23333	0.057735	fda_ligand_2063.pdbqt	ZINC000003782818	atacand	-8.7	-8.9	-8.9	-8.83333	0.11547	-8.53333	-0.6	hypertension	angiotensin receptor blockers
fda_ligand_0366.pdbqt	ZINC000006745272	stivarga	-8.2	-8.2	-7.9	-8.1	0.173205	fda_ligand_0366.pdbqt	ZINC000006745272	stivarga	-9.2	-8.5	-9	-8.9	0.360555	-8.5	-0.8	hepatocellular carcinoma	Tyrosine Kinase Inhibitor, Antineoplastics
fda_ligand_0730.pdbqt	ZINC000013831130	raltegravir	-8.1	-8.2	-8.5	-8.26667	0.208167	fda_ligand_0730.pdbqt	ZINC000013831130	raltegravir	-8.6	-8.8	-8.7	-8.7	0.1	-8.48333	-0.433333	HIV/AIDS	HIV integrase inhibitors
fda_ligand_0470.pdbqt	ZINC000011679756	eltrombopag	-8.5	-8.6	-8.3	-8.46667	0.152753	fda_ligand_0470.pdbqt	ZINC000011679756	eltrombopag	-8.4	-8.5	-8.5	-8.46667	0.057735	-8.46667	0	thrombocytopenia and severe aplastic anemia	thrombopoietin receptor agonists
fda_ligand_1352.pdbqt	ZINC000009212427	leucal	-8.2	-8.7	-8.2	-8.36667	0.288675	fda_ligand_1352.pdbqt	ZINC000009212427	leucal	-8.3	-8.3	-8.7	-8.43333	0.23094	-8.4	-0.0666667	folic acid analog
fda_ligand_0872.pdbqt	ZINC000006716957	nilotinib	-8.2	-8.3	-8.5	-8.33333	0.152753	fda_ligand_0872.pdbqt	ZINC000006716957	nilotinib	-8.3	-8.5	-8.5	-8.43333	0.11547	-8.38333	-0.1	leukemia	chemotherapy

## Sheet: top_30_both
LIGAND_NAME	ZINC_ID	Drug_name	4hww	4hxq	3sjt	Average	Standard_deviation	LIGAND_NAME	ZINC_ID	Drug_name	4hze	4i06	4ixu	Average	Standard_deviation	Disease_area	Drug_class
fda_ligand_1237.pdbqt	ZINC000003978005	dihydroergotamine	-8.3	-8.5	-8.4	-8.4	0.1	fda_ligand_1237.pdbqt	ZINC000003978005	dihydroergotamine	-8.6	-9.5	-9.6	-9.23333	0.550757	migraine headaches	ergot alkaloids
fda_ligand_1666.pdbqt	ZINC000169289767	trypan blue	-8.2	-9	-8.3	-8.5	0.43589	fda_ligand_1666.pdbqt	ZINC000169289767	trypan blue	-8.2	-8.8	-10.1	-9.03333	0.971253	opthalmic surgery	dye
fda_ligand_0085.pdbqt	ZINC000004212809	deflazacort	-8.5	-8.8	-8.7	-8.66667	0.152753	fda_ligand_0085.pdbqt	ZINC000004212809	deflazacort	-8.5	-8.9	-8.8	-8.73333	0.208167	anti-inflammatory and immunomodulatory agent	corticosteroid
fda_ligand_0132.pdbqt	ZINC000052955754	ergotamine	-8.7	-8.4	-8.5	-8.53333	0.152753	fda_ligand_0132.pdbqt	ZINC000052955754	ergotamine	-8.5	-9.1	-9	-8.86667	0.321455	migraine headaches	ergot alkaloids
fda_ligand_1202.pdbqt	ZINC000064033452	lumacaftor	-8.2	-8.6	-8.5	-8.43333	0.208167	fda_ligand_1202.pdbqt	ZINC000064033452	lumacaftor	-8.9	-8.9	-9.1	-8.96667	0.11547	cystic fibrosis	protein-folding chaperone
fda_ligand_1496.pdbqt	ZINC000003927870	fludarabine	-8.5	-8.6	-8.4	-8.5	0.1	fda_ligand_1496.pdbqt	ZINC000003927870	fludarabine	-8.7	-9	-8.9	-8.86667	0.152753	chronic lymphocytic leukaemia (CLL)	chemotherapy
fda_ligand_1802.pdbqt	ZINC000014210876	eluxadoline	-8.7	-8.8	-8.6	-8.7	0.1	fda_ligand_1802.pdbqt	ZINC000014210876	eluxadoline	-8.8	-8.6	-8.4	-8.6	0.2	IBS-D, diarrhea	mu-opioid receptor agonists
fda_ligand_0945.pdbqt	ZINC000004097286	budesonide	-8.2	-8.6	-8.5	-8.43333	0.208167	fda_ligand_0945.pdbqt	ZINC000004097286	budesonide	-8.8	-8.9	-8.8	-8.83333	0.057735	Crohn's disease, inflammation, IgA nephropathy	corticosteroid
fda_ligand_1686.pdbqt	ZINC000003807172	argatroban	-8.6	-7.7	-8	-8.1	0.458258	fda_ligand_1686.pdbqt	ZINC000003807172	argatroban	-8.8	-9.1	-9	-8.96667	0.152753	Thrombocytopenia, Percutaneous Coronary Intervention	Anticoagulants
fda_ligand_2063.pdbqt	ZINC000003782818	atacand	-8.2	-8.2	-8.3	-8.23333	0.057735	fda_ligand_2063.pdbqt	ZINC000003782818	atacand	-8.7	-8.9	-8.9	-8.83333	0.11547	hypertension	angiotensin receptor blockers
fda_ligand_0366.pdbqt	ZINC000006745272	stivarga	-8.2	-8.2	-7.9	-8.1	0.173205	fda_ligand_0366.pdbqt	ZINC000006745272	stivarga	-9.2	-8.5	-9	-8.9	0.360555	hepatocellular carcinoma	Tyrosine Kinase Inhibitor, Antineoplastics
fda_ligand_0730.pdbqt	ZINC000013831130	raltegravir	-8.1	-8.2	-8.5	-8.26667	0.208167	fda_ligand_0730.pdbqt	ZINC000013831130	raltegravir	-8.6	-8.8	-8.7	-8.7	0.1	HIV/AIDS	HIV integrase inhibitors
fda_ligand_0470.pdbqt	ZINC000011679756	eltrombopag	-8.5	-8.6	-8.3	-8.46667	0.152753	fda_ligand_0470.pdbqt	ZINC000011679756	eltrombopag	-8.4	-8.5	-8.5	-8.46667	0.057735	thrombocytopenia and severe aplastic anemia	thrombopoietin receptor agonists
fda_ligand_1352.pdbqt	ZINC000009212427	leucal	-8.2	-8.7	-8.2	-8.36667	0.288675	fda_ligand_1352.pdbqt	ZINC000009212427	leucal	-8.3	-8.3	-8.7	-8.43333	0.23094	folic acid analog
fda_ligand_0872.pdbqt	ZINC000006716957	nilotinib	-8.2	-8.3	-8.5	-8.33333	0.152753	fda_ligand_0872.pdbqt	ZINC000006716957	nilotinib	-8.3	-8.5	-8.5	-8.43333	0.11547	leukemia	chemotherapy
fda_ligand_1900.pdbqt	ZINC000016052277	doxycycline	-7.9	-8.2	-8.6	-8.23333	0.351188	fda_ligand_1900.pdbqt	ZINC000016052277	doxycycline	-8.5	-8.5	-8.6	-8.53333	0.057735	Bacterial infection	tetracycline antibiotic
fda_ligand_2098.pdbqt	ZINC000164528615	ZINC164528615 (Glecaprevir)	-7.8	-8.1	-8.4	-8.1	0.3	fda_ligand_2098.pdbqt	ZINC000164528615	ZINC164528615 (Glecaprevir)	-8.7	-8.6	-8.7	-8.66667	0.057735	hepatitis C infection	HCV NS3/4A protease inhibitors
fda_ligand_0023.pdbqt	ZINC000002005305	5-methyltetrahydrofolate	-7.9	-8.4	-8.2	-8.16667	0.251661	fda_ligand_0023.pdbqt	ZINC000002005305	5-methyltetrahydrofolate	-8.2	-8.8	-8.7	-8.56667	0.321455	Folic acid supplements
fda_ligand_0186.pdbqt	ZINC000003818726	belinostat	-8.2	-8.1	-8.1	-8.13333	0.057735	fda_ligand_0186.pdbqt	ZINC000003818726	belinostat	-8.4	-8.7	-8.5	-8.53333	0.152753	peripheral T-cell lymphoma	chemotherapy
fda_ligand_1190.pdbqt	ZINC000053683151	bromocriptine	-7.7	-7.8	-8.3	-7.93333	0.321455	fda_ligand_1190.pdbqt	ZINC000053683151	bromocriptine	-8.6	-8.6	-8.8	-8.66667	0.11547	dopamine agonist, parkinson disease, tumor, acromegaly, type-2-diabetes	ergoline derivative alkaloid
fda_ligand_0010.pdbqt	ZINC000001612996	irinotecan	-7.9	-8.5	-8.3	-8.23333	0.305505	fda_ligand_0010.pdbqt	ZINC000001612996	irinotecan	-8.2	-8.7	-8	-8.3	0.360555	antineoplastic	chemotherapy
fda_ligand_1857.pdbqt	ZINC000001543475	tdf	-8.2	-7.8	-8.1	-8.03333	0.208167	fda_ligand_1857.pdbqt	ZINC000001543475	tdf	-8	-8.8	-8.7	-8.5	0.43589	HIV	antiretroviral
fda_ligand_2092.pdbqt	ZINC000049783788	valrubicin	-7.7	-7.4	-7.3	-7.46667	0.208167	fda_ligand_2092.pdbqt	ZINC000049783788	valrubicin	-9.1	-8.8	-9.3	-9.06667	0.251661	antineoplastic	chemotherapy
fda_ligand_0416.pdbqt	ZINC000003977978	fluocinonide	-7.8	-8	-7.8	-7.86667	0.11547	fda_ligand_0416.pdbqt	ZINC000003977978	fluocinonide	-8.4	-8.6	-8.9	-8.63333	0.251661	inflammation	corticosteroids
fda_ligand_0568.pdbqt	ZINC000012503187	conivaptan	-8.6	-8.1	-7.5	-8.06667	0.550757	fda_ligand_0568.pdbqt	ZINC000012503187	conivaptan	-8.1	-8.2	-8.7	-8.33333	0.321455	euvolemic hyponatremia	non-peptide inhibitor
fda_ligand_1280.pdbqt	ZINC000003993855	cialis	-7.8	-7.8	-7.6	-7.73333	0.11547	fda_ligand_1280.pdbqt	ZINC000003993855	cialis	-8.7	-8.6	-8.7	-8.66667	0.057735	erectile dysfunction, benign prostatic hyperplasia, and pulmonary arterial hypertension	Phosphodiesterase-5 Enzyme Inhibitors
fda_ligand_0550.pdbqt	ZINC000003875483	opana	-7.7	-7.8	-8.4	-7.96667	0.378594	fda_ligand_0550.pdbqt	ZINC000003875483	opana	-8.1	-8.6	-8.5	-8.4	0.264575	help relieve moderate to severe pain	opioid analgesics
fda_ligand_1528.pdbqt	ZINC000001530636	famotidine	-7.8	-8.2	-8.3	-8.1	0.264575	fda_ligand_1528.pdbqt	ZINC000001530636	famotidine	-8.1	-8.4	-8.3	-8.26667	0.152753	stomach ulcers, GERD	histamine-2 blocker
fda_ligand_1703.pdbqt	ZINC000003830449	cefoxitin	-8.2	-8.3	-8.1	-8.2	0.1	fda_ligand_1703.pdbqt	ZINC000003830449	cefoxitin	-8.3	-8.2	-8	-8.16667	0.152753	bacterial infection	antibiotic
fda_ligand_1808.pdbqt	ZINC000043100709	trametinib	-8.3	-8.6	-7.1	-8	0.793725	fda_ligand_1808.pdbqt	ZINC000043100709	trametinib	-8.8	-8.1	-8.2	-8.36667	0.378594	antineoplastic	kinase inhibitor

## Sheet: arg1_top_15
LIGAND_NAME	ZINC_ID	Drug_name	4hww	4hxq	3sjt	Average	Standard_deviation	4hze	4i06	4ixu	Average	Standard_deviation	delta_delta-G	Disease_area	Drug_class
fda_ligand_0961.pdbqt	ZINC000003860453	ak-fluor	-8.5	-8.2	-8.3	-8.33333	0.152753	-7.5	-7.5	-7.5	-7.5	0	0.833333	diagnostic agent used in fluorescein angiography
fda_ligand_1702.pdbqt	ZINC000003816514	rolapitant	-8.1	-6.4	-8.4	-7.63333	1.07858	-6.8	-6.9	-7	-6.9	0.1	0.733333	Prevent nausea due to chemotherapy	antiemetics
fda_ligand_0709.pdbqt	ZINC000019632668	doxapram	-6.5	-6.1	-7.5	-6.7	0.72111	-5.7	-6.3	-6	-6	0.3	0.7	COPD	Respiratory Stimulants
fda_ligand_0384.pdbqt	ZINC000000591993	sular	-6.8	-6.8	-7.4	-7	0.34641	-6.2	-6	-6.8	-6.33333	0.416333	0.666667	hypertension	dihydropyridine class of calcium channel antagonists
fda_ligand_1709.pdbqt	ZINC000003629271	emtriva	-6.5	-6.6	-8	-7.03333	0.83865	-6.3	-6.5	-6.4	-6.4	0.1	0.633333	HIV infection	nucleoside reverse transcriptase inhibitors-NRTI
fda_ligand_1508.pdbqt	ZINC000000601250	sulconazole	-6.2	-6.4	-7.4	-6.66667	0.64291	-5.7	-6.4	-6.1	-6.06667	0.351188	0.6	fungal infection	imidazole class
fda_ligand_2006.pdbqt	ZINC000072318121	abemaciclib	-7.8	-7.8	-7.4	-7.66667	0.23094	-6.9	-7.5	-6.9	-7.1	0.34641	0.566667	antineoplastic	kinase inhibitors
fda_ligand_0339.pdbqt	ZINC000148723177	ZINC148723177 (Brigatinib)	-6.4	-6.7	-6.3	-6.46667	0.208167	-5.9	-5.9	-5.9	-5.9	0	0.566667	non-small cell lung cancer	kinase inhibitors
fda_ligand_2084.pdbqt	ZINC000100016058	tipranavir	-7.2	-7	-7.7	-7.3	0.360555	-7.1	-6.4	-6.8	-6.76667	0.351188	0.533333	HIV	protease inhibitors
fda_ligand_0839.pdbqt	ZINC000000538065	nefazodone	-6.8	-6.7	-6.6	-6.7	0.1	-6.5	-6.4	-5.6	-6.16667	0.493288	0.533333	atypical antidepressant	serotonin modulators
fda_ligand_0280.pdbqt	ZINC000002036848	riboflavin	-7.6	-9	-7.8	-8.13333	0.757188	-7.5	-7.7	-7.6	-7.6	0.1	0.533333	anemia, migraine headaches	vitamin B2
fda_ligand_0651.pdbqt	ZINC000003955219	darunavir	-7.1	-6.8	-7.5	-7.13333	0.351188	-6.9	-6.5	-6.4	-6.6	0.264575	0.533333	HIV	protease inhibitors
fda_ligand_0216.pdbqt	ZINC000068204830	daclatasvir	-7.9	-6.8	-7.9	-7.53333	0.635085	-7	-6.8	-7.3	-7.03333	0.251661	0.5	HCV	hepatitis C virus (HCV) NS5A inhibitors
fda_ligand_1147.pdbqt	ZINC000000000850	zyflo	-5.7	-5.9	-7.7	-6.43333	1.10151	-5.9	-6.1	-5.9	-5.96667	0.11547	0.466667	asthma	5-Lipoxygenase Inhibitors
fda_ligand_1164.pdbqt	ZINC000022016981	calteridol	-5.8	-6.3	-6.5	-6.2	0.360555	-5.6	-5.9	-5.7	-5.73333	0.152753	0.466667		tetraazacyclododecane-1,4,7-triacetic acid derivative

## Sheet: arg2_top_15
LIGAND_NAME	ZINC_ID	Drug_name	4hze	4i06	4ixu	Average	Standard_deviation	4hww	4hxq	3sjt	Average	Standard_deviation	delta_delta-G	Disease_area	Drug_class
fda_ligand_1925.pdbqt	ZINC000043450324	synribo	-8.5	-9	-8.9	-8.8	0.264575	-6.7	-6.6	-7.9	-7.06667	0.723418	1.73333	Chronic Myelogenous Leukemia	chemotherapy
fda_ligand_2092.pdbqt	ZINC000049783788	valrubicin	-9.1	-8.8	-9.3	-9.06667	0.251661	-7.7	-7.4	-7.3	-7.46667	0.208167	1.6	antineoplastic	chemotherapy
fda_ligand_0413.pdbqt	ZINC000001280665	hydrocodone	-8.1	-8.4	-8.3	-8.26667	0.152753	-6.6	-6.4	-7	-6.66667	0.305505	1.6	cough suppressant, pain killer	opioid
fda_ligand_0547.pdbqt	ZINC000003872931	avapro	-8.7	-8.9	-8.7	-8.76667	0.11547	-6.9	-7.4	-7.2	-7.16667	0.251661	1.6	high blood pressure, heart failure, and diabetic kidney disease, type-2 diabetes	Angiotensin 2 receptor blockers
fda_ligand_0949.pdbqt	ZINC000004175630	orap	-8.1	-8	-8.4	-8.16667	0.208167	-6.6	-6.8	-6.4	-6.6	0.2	1.56667	Tourette syndrome	antipsychotic
fda_ligand_1844.pdbqt	ZINC000000000903	alprazolam	-8.1	-8.3	-8.4	-8.26667	0.152753	-6.7	-6.7	-6.7	-6.7	0	1.56667	anxiety disorders and panic disorder	benzodiazepines
fda_ligand_1178.pdbqt	ZINC000000403533	oxycodone	-8.3	-8.7	-8.7	-8.56667	0.23094	-7.1	-6.9	-7	-7	0.1	1.56667	analgesic	opioid
fda_ligand_0435.pdbqt	ZINC000001485935	isavuconazole	-7	-9	-8	-8	1	-6	-6.3	-7.1	-6.46667	0.568624	1.53333	antifungal	triazole
fda_ligand_0858.pdbqt	ZINC000000001370	estazolam	-8	-8.1	-8.1	-8.06667	0.057735	-6.4	-6.5	-6.7	-6.53333	0.152753	1.53333	insomnia	tranquilizer, benzodiazepines
fda_ligand_1322.pdbqt	ZINC000100004343	coartem	-7.2	-7.1	-7.5	-7.26667	0.208167	-6.1	-6	-5.2	-5.76667	0.493288	1.5	Malaria	Antimalarials
fda_ligand_1718.pdbqt	ZINC000003806721	codeine	-7.9	-8.3	-8.1	-8.1	0.2	-6.6	-6.5	-6.7	-6.6	0.1	1.5	treat pain, coughing, and diarrhea	opiate (narcotic) analgesics
fda_ligand_0938.pdbqt	ZINC000002019954	articaine	-7.1	-7.1	-7.2	-7.13333	0.057735	-5.5	-5.6	-5.9	-5.66667	0.208167	1.46667	local anesthetic
fda_ligand_0161.pdbqt	ZINC000029416466	sqv (Saquinavir)	-7.7	-8	-7.3	-7.66667	0.351188	-6	-6.8	-6	-6.26667	0.46188	1.4	HIV/AIDS	antiretroviral
fda_ligand_1745.pdbqt	ZINC000003805768	ivabradine	-6.6	-6.5	-6.3	-6.46667	0.152753	-4.8	-5.3	-5.1	-5.06667	0.251661	1.4	heart failure	hyperpolarization-activated cyclic nucleotide-gated (HCN) channel blockers
fda_ligand_0211.pdbqt	ZINC000053229445	rocuronium	-6.8	-7.4	-7.2	-7.13333	0.305505	-5.9	-5.6	-5.8	-5.76667	0.152753	1.36667	muscle relaxant	Neuromuscular Blockers, Nondepolarizing
