# Supplementary material for: Virtual Screening for FDA-Approved Drugs That Selectively Inhibit Arginase Type 1 and 2
Source: Molecules. 2022 Aug 12;27(16):5134. doi: 10.3390/molecules27165134 (PMC9416497; doi:10.3390/molecules27165134)
Supplement: Supplementary file 1 [file molecules-27-05134-s001.zip › Table S5.xlsx]

## Sheet: PLIP_stat
fda_ligand	zinc_id	drug_name	MW	arg1 delG	arg2 delG	3sjt	4hze
fda_ligand_2063.pdbqt	ZINC000003782818	Candesartan	440.463	-8.3	-8.7	Hydrophobic (1), Hydrogen (6), Salt Bridges (1)	Hydrophobic (5), Hydrogen (5), Salt Bridges (1)
fda_ligand_0547.pdbqt	ZINC000003872931	Irbesartan	428.54	-7.2	-8.7	Hydrophobic (1), Hydrogen (4)	Hydrophobic (2), Hydrogen (4)
fda_ligand_0945.pdbqt	ZINC000004097286	Budesonide	430.541	-8.5	-8.8	Hydrogen (3), Salt Bridges (2)	Hydrophobic (1), Hydrogen (4), Salt Bridges (2)
fda_ligand_1718.pdbqt	ZINC000003806721	Codeine	299.37	-6.7	-7.9	Hydrophobic (1), Hydrogen (2), Salt Bridges (2)	Hydrophobic (1), Hydrogen (4), Salt Bridges (1)
fda_ligand_1027.pdbqt	ZINC000000643114	Indapamide	365.842	-6.7	-7.9	Hydrophobic (2), Hydrogen (6)	Hydrophobic (4),Hydrogen (5), Halogen (1)
fda_ligand_0435.pdbqt	ZINC000001485935	Isavuconazole	437.475	-7.1	-7	Hydrophobic (2),pi-Stacking (1), Halogen (1)	Hydrophobic (3),pi-Stacking (1), Halogen (1)
fda_ligand_2028.pdbqt	ZINC000012859773	Metformin	129.167	-6.2	-6.4	Hydrogen (5), pi-Cation (3), Salt Bridges (6)	Hydrogen (4), pi-Cation (3), Salt Bridges (6)
fda_ligand_1702.pdbqt	ZINC000003816514	Rolapitant	500.483	-8.4	-6.8	Hydrophobic (1),Hydrogen (2), pi-Stacking (1), Halogen (3)	Hydrophobic (2),Hydrogen (4)
fda_ligand_0998.pdbqt	ZINC000004340269	Amiloride	229.631	-7.8	-8.2	Hydrogen (5), salt bridge (2), pi-Stacking (2)	Hydrogen (9), salt bridge (5), pi-Cation (1)
fda_ligand_1745.pdbqt	ZINC000003805768	Ivabradine	468.594	-5.1	-6.6	Hydrogen (2)	Hydrophobic (1), Hydrogen (2), salt bridge (2), pi-Cation (1)
