# Supplementary material for: Virtual Screening for FDA-Approved Drugs That Selectively Inhibit Arginase Type 1 and 2
Source: Molecules. 2022 Aug 12;27(16):5134. doi: 10.3390/molecules27165134 (PMC9416497; doi:10.3390/molecules27165134)
Supplement: Supplementary file 1 [file molecules-27-05134-s001.zip › Table S6.xlsx]

## Sheet: MD_simulation_stats
Set A
fda_ligand	zinc_id	drug_name	MW	arg1 delG (3sjt)	arg2 delG (4hze)	3sjt	Time(ns)-ligand stay inside	4hze	Time(ns)-ligand stay inside
fda_ligand_2063.pdbqt	ZINC000003782818	Candesartan	440.463	-8.3	-8.7	Candesartan	50 ns	Candesartan	~36.9 ns
fda_ligand_0547.pdbqt	ZINC000003872931	Irbesartan	428.54	-7.2	-8.7	Irbesartan	50 ns	Irbesartan	~12.96 ns
fda_ligand_0945.pdbqt	ZINC000004097286	Budesonide	430.541	-8.5	-8.8	Budesonide	~12.74 ns	Budesonide	~2.56 ns
fda_ligand_1718.pdbqt	ZINC000003806721	Codeine	299.37	-6.7	-7.9	Codeine	~4.36 ns	Codeine	50 ns
fda_ligand_0435.pdbqt	ZINC000001485935	Isavucanazole	437.475	-7.1	-7	Isavucanazole	50 ns	Isavucanazole	50 ns
fda_ligand_2028.pdbqt	ZINC000012859773	Metformin	129.167	-6.2	-6.4	Metformin	50 ns	Metformin	50 ns
fda_ligand_1702.pdbqt	ZINC000003816514	Rolapitant	500.483	-8.4	-6.8	Rolapitant	~2.2 ns	Rolapitant	~13.16 ns
				-6.3	-6.3	Nor-NOHA	50 ns	Nor-NOHA	~16.52 ns
Set B
fda_ligand	zinc_id	drug_name	MW	arg1 delG (3sjt)	arg2 delG (4hze)	3sjt	Time(ns)-ligand stay inside	4hze	Time(ns)-ligand stay inside
fda_ligand_2063.pdbqt	ZINC000003782818	Candesartan	440.463	-8.3	-8.7	Candesartan	50 ns	Candesartan	~ 8.48 ns
fda_ligand_0547.pdbqt	ZINC000003872931	Irbesartan	428.54	-7.2	-8.7	Irbesartan	50 ns	Irbesartan	~ 11.52 ns
fda_ligand_1718.pdbqt	ZINC000003806721	Codeine	299.37	-6.7	-7.9	Codeine	~5.92 ns	Codeine	50 ns
fda_ligand_0435.pdbqt	ZINC000001485935	Isavucanazole	437.475	-7.1	-7	Isavucanazole	50 ns	Isavucanazole	50 ns
fda_ligand_2028.pdbqt	ZINC000012859773	Metformin	129.167	-6.2	-6.4	Metformin	50 ns	Metformin	50 ns
Set C
fda_ligand	zinc_id	drug_name	MW	arg1 delG (3sjt)	arg2 delG (4hze)	3sjt	Time(ns)-ligand stay inside	4hze	Time(ns)-ligand stay inside
fda_ligand_2063.pdbqt	ZINC000003782818	Candesartan	440.463	-8.3	-8.7	Candesartan	50 ns	Candesartan	~13.98 ns
fda_ligand_0547.pdbqt	ZINC000003872931	Irbesartan	428.54	-7.2	-8.7	Irbesartan	50 ns	Irbesartan	~ 1.2 ns
fda_ligand_1718.pdbqt	ZINC000003806721	Codeine	299.37	-6.7	-7.9	Codeine	~8.5 ns	Codeine	50 ns
fda_ligand_0435.pdbqt	ZINC000001485935	Isavucanazole	437.475	-7.1	-7	Isavucanazole	50 ns	Isavucanazole	50 ns
fda_ligand_2028.pdbqt	ZINC000012859773	Metformin	129.167	-6.2	-6.4	Metformin	50 ns	Metformin	50 ns

## Sheet: H-bonds_set_A
Frames	Candesartan_Hbonds_ARG1	Candesartan_Hbonds_ARG2	Codeine_Hbonds_ARG1	Codeine_Hbonds_ARG2	Irbesartan_Hbonds_ARG1	Irbesartan_Hbonds_ARG2	Isavuconazole_Hbonds_ARG1	Isavuconazole_Hbonds_ARG2	Metformin_Hbonds_ARG1	Metformin_Hbonds_ARG2
0	1	0	1	2	1	1	0	0	1	1
1	2	1	1	1	1	1	0	0	2	1
2	1	1	0	1	0	1	0	0	1	1
3	0	0	0	0	2	2	0	0	3	1
4	0	2	0	0	0	2	0	0	2	2
5	0	1	0	1	0	0	0	0	2	1
6	0	1	1	2	2	0	0	0	2	2
7	0	1	0	0	2	0	0	0	3	2
8	0	1	0	1	0	1	0	0	4	3
9	0	1	0	2	0	0	0	0	3	3
10	0	0	0	1	0	1	0	0	4	1
11	0	1	0	1	0	2	0	0	3	1
12	0	2	0	1	1	0	0	0	2	3
13	0	0	0	1	1	2	0	0	3	3
14	1	0	0	1	1	1	0	0	2	4
15	0	1	0	1	1	0	0	0	2	3
16	0	1	0	1	1	0	0	0	2	1
17	0	1	0	0	1	0	0	0	2	1
18	0	0	0	1	0	1	0	0	3	1
19	0	0	0	2	0	1	0	0	4	1
20	0	1	0	1	0	1	0	0	3	1
21	0	1	0	1	0	1	0	0	2	2
22	0	0	0	0	0	1	0	0	3	3
23	1	1	0	1	1	1	0	0	2	1
24	0	0	0	1	0	0	0	0	3	1
25	0	1	1	1	1	0	0	0	3	0
26	0	0	1	1	0	1	0	0	4	1
27	0	1	0	0	0	0	0	0	2	0
28	0	1	0	1	0	0	0	0	2	1
29	0	0	0	2	0	0	0	0	5	2
30	0	1	0	1	0	1	0	0	3	2
31	0	2	2	1	0	0	0	0	3	3
32	0	1	1	1	0	1	0	0	3	2
33	0	1	1	2	0	0	0	0	3	1
34	0	0	1	2	1	1	0	0	3	2
35	0	2	1	1	0	2	0	0	2	0
36	0	1	0	1	0	1	0	0	2	2
37	0	1	0	1	0	1	0	0	2	4
38	0	0	1	1	0	2	0	0	3	1
39	0	1	1	1	0	0	0	0	2	2
40	0	2	1	1	1	0	0	0	3	1
41	0	1	1	2	0	0	0	0	3	1
42	0	1	1	1	1	0	0	0	3	1
43	0	1	1	2	0	0	0	0	1	1
44	0	1	1	1	0	0	0	0	3	2
45	0	1	0	1	0	0	0	0	1	2
46	0	1	0	2	0	0	0	0	3	1
47	0	1	1	2	1	0	0	0	1	2
48	1	1	1	3	0	0	0	0	3	0
49	0	1	0	1	1	0	0	1	0	2
50	0	2	1	1	1	0	0	0	2	1
51	0	1	2	1	1	1	0	0	2	3
52	0	1	0	2	1	0	0	0	2	2
53	0	1	0	0	0	0	0	0	2	3
54	0	1	2	2	0	0	0	0	4	0
55	0	1	0	1	1	0	0	0	3	2
56	0	0	0	1	0	0	0	1	2	1
57	0	0	1	2	0	0	0	0	0	1
58	0	0	0	2	0	0	0	0	2	2
59	0	1	1	1	1	0	0	0	2	2
60	0	1	1	3	0	1	0	1	2	2
61	0	0	2	1	0	0	0	0	1	1
62	0	0	0	2	0	0	0	1	3	1
63	0	1	1	2	0	0	0	0	2	2
64	0	0	2	1	0	0	0	0	1	3
65	0	1	1	1	0	0	0	0	2	1
66	0	0	0	0	0	0	0	0	2	2
67	0	0	1	2	0	1	0	0	4	1
68	0	1	0	0	1	0	0	0	2	2
69	0	0	0	1	1	1	0	1	3	1
70	0	0	0	2	1	0	0	0	2	2
71	0	0	1	1	0	0	0	1	2	2
72	0	0	0	0	0	0	0	1	2	2
73	0	0	0	1	0	1	0	1	3	2
74	0	2	1	0	0	0	0	0	2	1
75	0	1	2	1	0	0	0	0	5	1
76	0	0	2	0	0	0	0	0	2	1
77	0	1	1	0	0	0	0	0	3	2
78	0	1	1	1	1	0	0	0	1	2
79	0	0	0	2	0	1	0	0	1	0
80	0	0	0	2	1	0	0	2	4	2
81	0	1	0	2	0	0	0	0	3	3
82	0	0	1	2	0	1	0	0	2	1
83	0	0	1	1	1	2	0	0	1	2
84	1	0	0	2	1	0	0	0	2	1
85	0	1	1	1	1	0	0	0	1	1
86	0	0	1	0	0	1	0	0	1	1
87	1	1	1	0	1	0	0	0	2	1
88	1	1	0	2	1	0	0	0	2	2
89	1	0	0	1	1	0	0	0	1	0
90	0	0	1	2	1	0	0	0	2	2
91	1	1	0	1	0	1	0	0	2	1
92	1	1	1	2	1	2	0	1	1	2
93	0	0	1	2	0	1	0	0	0	1
94	1	1	0	1	0	1	0	0	2	0
95	1	0	0	0	1	1	0	0	2	1
96	1	0	1	2	1	0	0	0	2	1
97	1	1	1	1	1	0	0	0	3	2
98	1	1	0	1	0	1	0	0	1	1
99	1	0	1	1	1	1	0	0	3	0
100	0	0	1	1	1	1	0	1	2	1
101	1	0	0	0	1	1	0	0	2	2
102	1	2	0	2	2	0	0	1	2	1
103	1	1	0	1	1	0	0	1	3	2
104	0	1	0	1	0	0	0	0	3	2
105	1	0	1	0	0	0	0	0	3	3
106	1	0	0	2	0	0	0	1	3	4
107	1	0	1	1	0	1	0	0	2	1
108	1	0	2	1	0	0	0	1	2	2
109	1	1	1	2	0	0	0	0	2	0
110	0	1	1	1	0	0	0	0	3	2
111	0	0	1	0	0	1	0	0	1	1
112	0	1	1	1	0	0	0	0	3	2
113	2	0	2	1	0	0	0	0	1	3
114	0	0	0	2	0	0	0	0	2	2
115	0	0	2	1	0	0	0	0	2	1
116	1	1	1	0	0	1	0	0	3	2
117	0	0	0	1	0	1	0	0	3	2
118	1	1	1	0	0	1	0	0	2	0
119	0	0	1	2	0	0	0	0	1	1
120	0	0	0	1	0	1	0	0	1	2
121	1	2	1	1	0	0	0	0	2	1
122	0	0	1	0	0	0	0	0	2	2
123	0	1	1	1	0	0	0	0	2	1
124	0	1	1	1	0	1	0	0	1	2
125	0	0	0	2	0	1	0	1	1	2
126	1	0	1	0	0	1	0	0	3	3
127	0	0	2	1	0	1	0	0	2	1
128	1	0	0	0	0	1	0	0	0	0
129	0	0	0	1	0	1	0	0	0	0
130	0	0	1	1	0	0	0	0	4	1
131	1	1	1	1	0	0	0	0	2	3
132	1	0	2	1	0	0	0	0	1	0
133	0	0	0	1	0	1	0	0	1	2
134	1	0	0	1	0	1	0	0	2	2
135	1	0	1	0	1	0	0	0	1	1
136	1	0	2	0	0	1	0	0	4	3
137	1	0	1	0	0	0	0	0	1	4
138	1	0	1	0	0	0	0	0	1	2
139	1	0	1	1	0	1	0	0	2	0
140	1	0	1	0	0	0	0	0	1	3
141	1	0	1	0	0	0	0	0	0	1
142	1	0	1	0	0	1	0	0	3	2
143	1	0	0	1	0	1	0	0	2	2
144	1	0	1	1	0	0	0	0	3	2
145	2	0	1	0	0	1	0	0	1	1
146	0	0	0	1	0	1	0	0	1	1
147	1	0	0	0	0	1	0	0	3	1
148	0	0	2	0	0	0	0	0	1	2
149	1	0	0	0	0	0	0	0	3	2
150	1	0	1	0	0	1	0	0	3	3
151	0	0	1	0	0	0	0	0	1	1
152	0	0	1	0	0	0	0	0	2	1
153	0	0	0	0	0	0	0	0	3	0
154	1	0	0	0	0	1	0	0	2	3
155	1	0	1	0	0	0	0	1	2	2
156	1	0	0	0	0	0	0	0	1	4
157	1	0	0	0	0	1	0	1	2	2
158	1	1	0	0	0	1	0	0	2	3
159	1	0	0	0	0	1	0	0	2	0
160	1	1	0	0	0	1	0	0	2	1
161	0	0	0	0	0	0	0	0	2	2
162	1	0	0	0	0	0	0	0	0	1
163	0	0	0	0	0	0	0	1	4	3
164	0	0	0	0	0	1	0	0	2	0
165	1	0	0	0	0	1	0	1	1	1
166	1	0	1	0	0	1	0	0	2	3
167	0	0	1	0	0	1	0	0	3	3
168	0	0	0	0	0	0	0	0	0	1
169	1	0	0	0	0	0	0	0	1	0
170	0	0	1	0	0	1	0	0	1	2
171	1	0	0	0	0	0	0	1	1	3
172	0	0	0	0	0	0	0	1	0	1
173	0	0	0	0	0	1	0	0	0	2
174	1	0	1	0	0	0	0	0	2	1
175	0	0	1	0	0	0	0	0	3	1
176	0	0	0	0	0	0	0	0	1	0
177	1	0	0	0	0	0	0	1	1	2
178	0	0	0	0	0	1	0	1	2	1
179	0	0	0	0	0	0	0	0	2	1
180	0	0	0	0	0	0	0	0	2	1
181	1	0	0	0	0	0	0	1	2	0
182	0	0	0	0	0	0	0	0	1	3
183	0	1	0	0	0	0	0	0	2	1
184	1	0	1	0	0	0	0	0	2	3
185	0	0	0	0	0	1	0	0	1	2
186	0	0	0	0	0	1	0	0	1	0
187	0	0	0	0	0	0	0	0	3	3
188	1	0	1	0	0	0	0	0	2	2
189	0	0	0	0	0	1	0	0	3	1
190	0	0	0	0	0	0	0	1	2	0
191	0	1	0	0	0	0	0	0	2	2
192	0	0	1	0	0	2	0	0	1	1
193	0	0	0	0	0	0	0	0	2	1
194	0	1	0	0	0	0	0	0	3	1
195	0	0	0	0	0	0	0	0	2	0
196	0	1	0	0	0	0	0	0	3	0
197	0	1	1	0	0	1	0	0	2	0
198	0	0	1	0	0	0	0	0	2	0
199	1	0	0	0	0	1	0	0	1	1
200	0	1	0	0	0	0	0	0	0	0
201	0	0	0	0	0	0	0	0	0	0
202	0	0	0	0	0	0	0	0	3	0
203	0	0	0	0	0	0	0	0	2	0
204	0	2	0	0	0	0	0	0	3	0
205	0	0	1	0	0	0	0	0	4	1
206	0	2	1	0	0	0	0	0	2	1
207	0	1	1	0	0	0	1	0	1	0
208	0	0	0	0	0	0	0	0	2	0
209	0	0	0	0	0	0	0	0	1	1
210	0	0	1	0	0	0	0	2	2	0
211	0	1	1	0	0	1	0	0	2	0
212	0	0	0	0	0	1	0	0	0	1
213	0	1	1	0	0	2	0	1	2	1
214	0	1	0	0	0	0	0	0	1	1
215	0	1	0	0	0	0	0	0	1	1
216	0	1	0	0	0	0	0	0	2	2
217	1	0	0	0	0	0	0	0	1	0
218	0	1	0	0	0	0	0	1	0	0
219	0	1	0	0	0	0	0	1	2	1
220	0	1	0	0	0	0	0	0	1	1
221	0	0	0	0	0	0	0	0	1	0
222	1	1	0	0	0	0	0	0	3	1
223	1	0	0	0	0	1	0	0	2	1
224	1	0	0	0	0	0	0	1	3	1
225	0	1	0	0	0	0	0	1	2	0
226	0	0	0	0	0	0	0	0	1	1
227	0	0	0	0	0	0	0	0	1	3
228	0	1	0	0	0	0	0	0	0	2
229	0	1	0	0	0	0	0	0	2	0
230	0	2	0	0	0	0	0	1	2	2
231	0	0	0	0	0	0	0	0	3	2
232	0	1	0	0	0	0	0	0	1	0
233	0	0	0	0	0	0	0	0	0	0
234	0	3	0	1	0	0	0	1	1	1
235	0	1	0	0	0	1	0	0	2	0
236	0	0	0	0	0	1	0	0	1	0
237	0	1	0	0	0	0	0	0	1	1
238	0	2	0	0	0	0	0	0	1	1
239	0	1	0	0	0	0	0	0	3	1
240	0	0	0	0	0	0	0	0	0	1
241	0	0	0	0	0	0	0	0	2	0
242	0	1	0	0	0	0	0	1	2	1
243	0	0	0	0	0	1	0	0	1	1
244	0	0	0	0	0	1	0	0	1	0
245	0	2	0	0	0	0	0	0	2	0
246	0	1	0	0	0	0	0	0	0	1
247	0	1	0	1	0	0	0	1	2	1
248	0	0	0	0	0	1	0	1	2	0
249	0	0	0	1	0	0	0	0	2	0
250	0	0	0	0	0	0	0	0	3	2
251	0	2	0	0	0	0	0	0	3	1
252	0	0	0	1	1	0	0	1	0	2
253	0	1	0	1	0	2	0	0	4	1
254	0	0	0	0	0	0	0	1	1	1
255	0	1	0	0	0	0	0	0	1	2
256	0	0	0	0	0	0	0	0	3	2
257	0	1	0	0	0	0	0	1	2	2
258	0	2	0	0	0	0	0	0	1	1
259	0	0	0	0	0	0	0	0	2	0
260	0	0	0	0	0	0	0	1	2	1
261	0	0	0	0	0	0	0	0	3	1
262	0	1	0	0	0	0	0	0	1	2
263	0	0	0	0	0	0	0	0	3	2
264	0	0	0	0	0	0	0	0	1	2
265	0	0	0	0	0	0	0	0	1	2
266	0	0	0	0	0	1	0	0	0	2
267	0	0	0	0	0	1	0	0	2	1
268	0	1	0	0	0	0	0	0	3	2
269	0	0	0	1	0	1	0	0	0	2
270	0	1	0	0	0	0	0	0	2	1
271	0	2	0	2	0	1	0	1	1	1
272	0	0	0	0	0	1	0	1	2	2
273	0	1	0	1	0	0	0	0	2	1
274	0	1	0	0	0	0	0	0	0	1
275	0	0	0	1	0	0	0	1	2	1
276	0	0	0	0	0	0	0	0	3	1
277	0	1	0	0	0	0	0	0	2	2
278	0	1	0	0	0	0	0	0	4	1
279	0	0	0	0	0	0	0	0	0	0
280	0	0	0	1	0	0	0	1	3	2
281	0	0	0	0	0	0	0	0	2	2
282	0	0	0	0	0	0	0	0	2	1
283	0	1	0	1	0	0	0	0	2	2
284	0	2	0	1	0	0	0	0	1	1
285	0	0	0	1	0	0	0	0	2	1
286	0	0	0	0	0	1	0	0	2	0
287	0	1	0	1	0	0	0	0	3	3
288	0	0	0	1	0	0	0	0	0	4
289	0	0	0	1	0	0	0	0	3	3
290	0	0	0	1	0	0	0	0	2	2
291	0	0	0	1	0	1	0	0	0	3
292	0	0	0	1	0	0	0	0	1	4
293	0	1	0	0	0	0	0	0	2	4
294	0	1	0	0	0	0	0	0	3	3
295	0	0	0	1	0	0	0	0	3	2
296	0	2	0	1	0	1	0	0	1	4
297	0	1	0	0	0	0	0	0	1	2
298	0	1	0	0	0	1	0	0	3	4
299	0	0	0	0	0	0	0	0	1	3
300	0	0	0	0	0	1	0	0	1	4
301	0	0	0	0	0	0	0	0	1	1
302	0	1	0	0	0	1	0	0	2	2
303	0	1	0	0	0	0	0	0	3	4
304	0	0	0	0	0	0	0	0	1	3
305	0	0	0	1	0	0	0	0	2	3
306	0	0	0	0	0	0	0	0	1	2
307	0	0	0	0	0	0	0	0	3	3
308	0	0	0	0	0	0	0	0	1	2
309	0	1	0	0	0	0	0	0	3	3
310	0	0	0	0	0	0	0	0	1	2
311	0	0	0	0	0	0	0	0	1	4
312	0	0	0	0	0	0	0	1	2	3
313	0	1	0	1	0	1	0	0	3	3
314	0	0	0	0	0	1	0	0	3	1
315	0	0	0	0	0	0	0	0	2	3
316	0	1	0	1	0	0	0	0	2	3
317	0	1	0	0	0	0	0	0	0	3
318	0	0	0	0	0	0	0	1	3	2
319	0	0	0	1	0	0	0	0	2	4
320	1	0	0	1	0	0	0	0	3	1
321	0	0	0	1	0	1	0	1	1	3
322	0	0	0	0	0	0	0	0	1	1
323	0	1	0	1	0	0	1	0	2	3
324	1	0	0	0	0	1	0	0	2	3
325	0	0	0	0	0	0	0	0	2	1
326	1	0	0	0	0	1	0	0	2	1
327	0	0	0	0	0	1	0	0	2	5
328	0	0	0	0	0	0	0	0	1	3
329	1	0	0	0	0	0	0	0	2	4
330	1	0	0	0	0	0	1	0	1	4
331	1	1	0	0	0	0	0	0	1	3
332	0	1	0	0	0	0	0	0	3	3
333	0	0	0	0	0	0	0	0	3	2
334	0	0	0	0	0	0	0	0	3	4
335	0	0	0	0	0	0	0	0	3	1
336	0	0	0	0	0	0	0	1	2	1
337	0	0	0	0	0	0	0	0	3	3
338	0	1	0	0	0	0	0	1	1	1
339	0	1	0	0	0	0	0	0	1	4
340	0	1	0	0	0	0	0	1	1	4
341	1	1	0	0	0	0	0	0	0	3
342	0	1	0	0	0	0	0	1	1	3
343	0	0	0	0	0	0	0	1	1	2
344	1	1	0	0	0	0	0	0	2	4
345	0	1	0	0	0	0	0	0	2	4
346	0	1	0	1	0	0	0	0	2	2
347	1	1	0	1	0	0	0	1	2	5
348	0	1	0	0	0	0	0	0	3	2
349	0	2	0	0	0	0	0	0	2	4
350	0	1	0	0	0	0	0	1	2	5
351	0	0	0	0	0	0	0	0	2	4
352	0	2	0	1	0	0	0	0	3	2
353	0	0	0	1	0	0	0	0	3	3
354	0	1	0	1	0	0	1	1	1	3
355	0	1	0	0	0	0	1	0	1	2
356	0	1	0	0	0	0	0	1	2	2
357	0	0	0	0	0	0	0	0	3	5
358	1	1	0	0	0	0	0	0	1	1
359	1	1	0	0	0	0	0	1	2	2
360	0	2	0	1	0	0	0	1	2	4
361	1	1	0	0	0	0	0	0	2	3
362	0	0	0	0	0	0	0	0	0	3
363	1	0	0	0	0	0	0	0	2	3
364	0	0	0	0	0	0	0	1	2	2
365	0	0	0	0	0	0	0	0	3	2
366	0	0	0	0	0	0	0	0	2	2
367	0	0	0	0	0	0	0	0	0	3
368	1	1	0	0	0	0	0	0	2	3
369	0	1	0	0	0	0	0	0	3	4
370	0	1	0	1	0	0	0	0	1	2
371	0	0	0	1	0	0	0	0	2	2
372	2	0	0	0	0	0	0	0	1	2
373	1	1	0	0	0	0	0	0	3	3
374	2	0	0	0	0	0	0	0	3	3
375	0	0	0	0	0	0	0	0	3	3
376	1	0	0	0	0	0	0	0	3	3
377	0	1	0	0	0	0	0	1	1	2
378	1	1	0	0	0	0	0	0	1	4
379	1	2	0	0	0	0	0	1	1	4
380	0	0	0	0	0	0	0	0	1	3
381	1	1	0	0	0	0	0	0	1	0
382	1	1	0	0	0	0	0	0	3	2
383	1	2	0	0	0	0	0	1	1	4
384	1	1	0	0	0	1	0	0	2	1
385	1	1	0	0	0	0	0	0	2	3
386	1	0	0	0	0	0	0	0	1	4
387	1	0	0	0	0	0	0	0	2	2
388	0	0	0	0	0	0	0	1	2	4
389	1	0	0	0	0	0	0	0	0	1
390	1	0	0	0	0	0	0	0	2	5
391	1	0	0	0	0	0	0	0	3	1
392	1	0	0	0	0	0	0	0	1	4
393	1	0	0	0	0	0	1	2	3	3
394	0	0	0	0	0	0	0	0	3	2
395	0	1	0	0	0	0	0	0	2	2
396	1	0	0	0	0	0	0	1	3	4
397	1	0	0	0	0	0	0	0	3	3
398	0	1	0	0	0	0	0	0	3	2
399	0	0	0	0	0	0	0	0	2	2
400	0	1	0	0	0	0	0	0	2	4
401	0	0	0	0	0	0	0	0	1	3
402	1	0	0	0	0	0	0	0	3	3
403	1	1	0	0	0	0	0	0	2	2
404	0	0	0	0	0	0	0	0	2	5
405	1	1	0	0	0	0	0	0	2	3
406	0	0	0	0	0	0	1	0	2	4
407	1	1	0	0	0	0	0	1	1	3
408	0	0	0	0	0	0	0	0	1	4
409	0	2	0	0	0	0	0	1	3	3
410	0	1	0	0	0	0	0	0	3	1
411	0	1	0	0	0	0	0	0	2	4
412	1	1	0	0	0	0	0	0	2	2
413	0	1	0	0	0	0	1	0	2	1
414	0	0	0	0	0	0	1	0	1	2
415	0	0	0	0	0	0	0	0	2	2
416	1	0	0	0	0	0	0	0	1	3
417	0	1	0	1	0	0	0	0	3	3
418	0	0	0	0	0	0	0	0	3	3
419	0	0	0	0	0	0	0	0	2	3
420	0	1	0	1	0	0	0	0	2	2
421	0	1	0	0	0	0	0	0	2	3
422	0	0	0	1	0	0	0	0	2	1
423	1	1	0	1	0	0	0	0	1	3
424	1	1	0	1	0	1	0	1	2	3
425	1	1	0	0	0	1	0	0	2	3
426	0	1	0	0	0	0	0	1	2	2
427	0	1	0	0	0	1	0	0	1	2
428	0	1	0	1	0	1	0	0	2	2
429	1	1	0	0	0	0	0	0	2	3
430	1	1	0	0	0	1	0	0	2	3
431	1	1	0	1	0	1	0	0	2	4
432	1	0	0	0	0	1	0	0	2	3
433	1	1	0	0	0	0	0	0	2	2
434	0	1	0	0	0	2	0	0	3	3
435	0	0	0	0	0	0	0	0	1	2
436	0	0	0	0	0	0	0	0	1	2
437	1	0	0	0	0	1	0	1	2	4
438	0	0	0	0	0	1	0	0	1	4
439	1	0	0	1	0	1	0	1	3	2
440	1	0	0	0	0	1	0	1	1	3
441	1	0	0	0	0	0	0	0	2	3
442	1	0	0	0	0	1	0	0	3	1
443	1	0	0	0	0	1	0	0	3	4
444	1	0	0	0	0	1	1	1	1	2
445	1	0	0	0	0	1	0	0	2	1
446	1	0	0	1	0	1	0	0	2	2
447	1	0	0	0	0	0	0	1	2	2
448	0	0	0	0	0	1	0	0	1	4
449	1	0	0	0	0	1	0	0	3	4
450	1	0	0	0	0	0	0	0	3	4
451	0	0	0	0	0	1	0	0	1	3
452	0	0	0	1	0	1	0	0	1	3
453	0	0	0	0	0	0	0	0	1	1
454	1	0	0	0	0	0	0	0	3	5
455	1	0	0	0	0	0	0	0	3	3
456	1	0	0	0	0	0	0	0	2	1
457	0	0	0	0	0	0	0	0	2	3
458	0	0	0	0	0	1	0	2	1	3
459	0	0	0	0	0	0	0	0	1	3
460	1	1	0	0	0	1	0	1	3	2
461	0	0	0	0	0	1	0	1	2	1
462	1	0	0	0	0	0	0	0	1	2
463	0	0	0	0	0	0	0	1	1	4
464	0	0	0	0	0	0	0	1	2	3
465	1	0	0	0	0	0	0	1	2	3
466	0	0	0	0	0	0	0	1	2	4
467	0	0	0	0	0	0	0	1	2	2
468	1	0	0	0	0	0	0	0	1	2
469	0	0	0	0	0	1	0	1	2	1
470	0	0	0	0	0	1	0	0	3	1
471	0	0	0	0	0	0	0	1	2	3
472	0	0	0	0	0	0	0	0	2	4
473	0	0	0	1	0	1	0	1	2	3
474	1	0	0	0	0	0	0	1	2	1
475	0	0	0	0	0	1	0	1	2	2
476	1	1	0	0	0	0	0	0	2	2
477	1	0	0	0	0	1	0	0	2	2
478	0	0	0	0	0	1	0	0	0	1
479	2	0	0	1	0	1	0	1	3	2
480	1	1	0	0	0	0	0	0	2	1
481	1	0	0	0	0	0	0	0	2	3
482	1	0	0	0	0	0	0	0	1	3
483	1	0	0	0	0	0	0	1	2	2
484	1	0	0	1	0	0	1	0	2	2
485	1	0	0	0	0	0	0	0	3	1
486	1	0	0	0	0	0	1	0	1	3
487	1	0	0	0	0	0	0	0	2	1
488	0	0	0	0	0	0	1	0	1	4
489	1	1	0	1	0	0	0	1	1	1
490	0	0	0	0	0	0	0	1	2	3
491	0	0	0	0	0	0	0	0	3	2
492	1	0	0	0	0	1	0	1	2	2
493	2	1	0	0	0	0	0	1	3	2
494	1	0	0	0	0	1	0	1	3	4
495	0	1	0	1	0	1	0	0	2	3
496	0	0	0	0	0	1	0	0	2	5
497	0	1	0	0	0	0	0	0	2	3
498	0	0	0	0	0	0	0	1	0	2
499	1	1	0	1	0	0	0	0	1	4
500	1	0	0	0	0	0	0	1	2	2
501	1	1	0	0	0	0	0	0	2	2
502	1	1	0	0	0	1	0	1	2	2
503	0	1	0	0	1	0	0	0	2	2
504	0	0	0	0	1	1	0	0	3	4
505	0	0	0	1	1	1	0	0	2	1
506	0	1	0	1	1	1	0	0	2	3
507	0	0	0	1	0	1	0	1	2	2
508	0	0	0	0	1	0	0	1	3	4
509	0	0	0	0	1	1	0	1	2	4
510	1	0	0	0	1	0	0	1	1	4
511	1	1	0	0	1	0	0	0	2	5
512	1	0	0	1	1	0	0	0	1	2
513	0	0	0	0	0	0	0	1	1	4
514	0	1	0	0	0	1	0	0	2	5
515	0	0	0	0	1	1	0	0	1	1
516	1	0	0	0	1	0	0	0	2	3
517	0	1	0	0	1	1	0	1	1	3
518	1	0	0	0	1	1	0	1	2	2
519	0	1	0	0	1	0	1	0	2	3
520	1	1	0	0	1	0	0	0	2	3
521	0	1	0	0	1	1	0	1	3	4
522	0	0	0	0	1	1	1	0	1	1
523	1	0	0	0	0	1	1	0	1	2
524	0	0	0	0	0	0	0	0	1	4
525	1	0	0	0	1	0	0	1	1	2
526	0	0	0	0	0	0	0	1	2	4
527	1	0	0	0	1	0	0	0	2	2
528	1	0	0	0	1	1	0	0	2	4
529	0	0	0	0	0	1	0	0	3	2
530	1	0	0	0	0	0	0	0	0	5
531	1	0	0	0	0	0	1	0	2	3
532	0	0	0	0	0	1	0	1	3	2
533	0	0	0	1	0	1	0	0	1	3
534	1	0	0	0	0	0	0	1	3	2
535	1	0	0	0	0	1	0	1	0	2
536	1	0	0	0	0	0	0	1	2	3
537	1	0	0	0	0	0	0	0	1	2
538	0	0	0	0	0	0	0	1	1	3
539	0	0	0	0	0	0	0	0	0	4
540	0	0	0	0	0	0	0	0	2	3
541	0	0	0	1	0	0	0	0	1	4
542	1	0	0	0	0	0	0	1	1	5
543	1	0	0	1	0	0	0	0	1	3
544	1	0	0	0	0	0	1	1	2	1
545	0	0	0	0	0	0	0	1	2	3
546	1	0	0	1	0	0	0	1	2	4
547	0	0	0	1	0	0	0	0	2	3
548	0	0	0	1	0	0	1	0	1	2
549	0	0	0	0	0	0	0	0	3	3
550	0	0	0	0	0	0	0	0	1	4
551	1	0	0	1	0	0	0	1	1	2
552	0	0	0	1	0	0	0	0	3	5
553	1	0	0	0	0	0	0	0	3	4
554	1	0	0	0	0	0	0	1	2	2
555	1	0	0	0	0	0	0	1	2	4
556	0	0	0	0	0	0	0	0	1	4
557	1	0	0	0	0	1	0	0	2	3
558	1	0	0	0	0	1	0	1	2	4
559	0	0	0	0	0	0	0	0	2	3
560	0	0	0	0	0	0	0	0	1	4
561	0	0	0	0	0	0	0	1	2	3
562	0	0	0	0	0	0	0	0	2	2
563	0	0	0	0	0	0	0	0	2	2
564	0	0	0	0	0	1	0	0	2	3
565	1	0	0	0	0	0	0	1	1	3
566	1	0	0	0	0	0	0	1	2	1
567	0	0	0	0	0	0	0	1	1	2
568	0	0	0	0	0	0	0	0	1	3
569	1	0	0	0	0	0	0	0	3	3
570	1	0	0	0	0	0	0	1	2	1
571	0	0	0	0	0	0	0	1	2	1
572	0	0	0	0	0	0	0	1	4	2
573	0	0	0	0	0	0	0	1	2	2
574	0	0	0	0	0	0	0	1	3	5
575	1	0	0	0	0	0	0	1	2	1
576	0	0	0	0	0	0	0	1	1	3
577	0	0	0	0	0	0	0	1	1	4
578	1	0	0	0	0	0	0	1	2	4
579	1	0	0	0	0	0	0	0	2	3
580	1	0	0	0	0	0	0	0	4	3
581	0	0	0	1	0	0	0	1	2	2
582	1	0	0	1	1	0	0	1	1	3
583	1	0	0	0	1	0	0	1	3	1
584	1	0	0	0	0	0	0	0	1	4
585	1	0	0	0	0	0	0	1	2	5
586	1	0	0	0	0	0	0	0	2	4
587	1	0	0	0	0	0	0	0	3	4
588	2	0	0	0	0	0	0	0	2	5
589	2	0	0	0	0	0	0	0	2	5
590	1	0	0	0	1	0	0	0	2	1
591	2	0	0	0	0	0	0	1	2	5
592	1	0	0	0	0	0	0	0	4	3
593	0	0	0	0	0	0	0	0	3	1
594	1	0	0	0	0	0	0	0	5	4
595	0	0	0	0	0	0	0	1	2	5
596	0	0	0	0	0	0	0	0	1	0
597	0	0	0	0	1	0	0	1	1	2
598	1	0	0	0	1	0	0	0	3	4
599	0	0	0	0	1	0	0	0	2	2
600	1	0	0	0	1	0	0	1	0	4
601	1	0	0	0	0	0	0	0	2	3
602	1	0	0	0	0	0	0	1	2	3
603	0	0	0	0	1	0	0	0	1	2
604	0	0	0	0	0	0	0	0	1	4
605	1	0	0	0	1	0	0	0	1	3
606	0	0	0	0	1	0	0	1	1	2
607	0	0	0	0	0	0	0	0	1	4
608	0	0	0	0	0	0	0	1	1	3
609	1	0	0	0	0	0	0	1	2	3
610	0	0	0	0	1	0	0	0	3	3
611	0	0	0	0	0	0	0	1	1	4
612	0	0	0	0	0	0	0	1	2	3
613	0	0	0	0	1	0	0	0	2	3
614	2	0	0	0	1	0	0	1	4	3
615	1	0	0	0	0	0	0	0	3	2
616	2	0	0	0	1	0	0	1	1	2
617	1	0	0	0	0	0	0	1	2	1
618	2	0	0	0	1	0	0	0	3	3
619	1	0	0	0	0	0	0	0	3	4
620	1	0	0	0	0	0	1	0	1	1
621	0	0	0	0	0	0	0	0	2	3
622	1	0	0	0	1	0	0	0	1	2
623	1	0	0	0	0	0	0	0	2	2
624	0	0	0	0	2	0	0	0	1	1
625	2	0	0	0	0	0	0	0	1	3
626	2	0	0	0	1	0	0	1	1	3
627	1	0	0	0	0	0	0	1	0	4
628	1	0	0	0	0	0	0	1	1	1
629	1	0	0	0	1	1	0	0	2	3
630	1	0	0	0	1	0	1	1	1	1
631	2	0	0	0	1	0	0	0	2	5
632	2	0	0	0	0	0	0	0	1	4
633	1	0	0	0	0	0	0	0	2	4
634	1	0	0	0	1	0	0	1	2	2
635	1	0	0	0	0	0	0	0	2	4
636	2	0	0	0	1	0	0	1	3	3
637	1	0	0	0	0	0	0	1	1	5
638	2	0	0	0	0	0	0	1	2	3
639	2	0	0	0	0	0	0	1	4	3
640	1	1	0	0	0	0	0	1	1	2
641	1	0	0	0	0	0	0	1	1	1
642	1	0	0	0	0	0	0	0	1	2
643	0	0	0	0	1	0	0	1	2	3
644	1	0	0	0	1	0	0	0	2	2
645	1	0	0	0	1	0	0	0	2	1
646	0	0	0	0	0	0	0	0	1	4
647	0	0	0	0	0	0	0	0	1	1
648	1	0	0	0	1	0	0	0	0	1
649	1	0	0	0	0	0	0	0	2	1
650	1	0	0	0	1	0	0	1	3	1
651	1	0	0	0	0	0	1	0	2	2
652	0	0	0	0	0	0	0	0	2	3
653	1	0	0	0	0	0	0	1	3	3
654	2	0	0	0	1	0	0	1	1	2
655	1	0	0	0	1	0	0	0	3	0
656	2	0	0	0	0	0	0	0	2	5
657	1	0	0	0	0	0	0	1	2	2
658	2	0	0	0	0	0	0	1	2	4
659	2	0	0	0	0	0	0	0	2	3
660	1	1	0	0	0	0	0	1	1	4
661	0	0	0	0	1	0	0	0	3	4
662	0	1	0	0	0	0	1	1	2	2
663	2	0	0	0	1	0	1	0	2	4
664	0	0	0	0	1	0	0	0	1	3
665	1	1	0	0	0	0	0	0	2	3
666	2	0	0	0	1	0	0	0	2	2
667	1	0	0	0	1	0	0	1	1	3
668	2	0	0	0	0	0	0	0	2	2
669	2	0	0	0	0	0	0	1	2	3
670	1	0	0	0	1	0	0	0	5	4
671	1	1	0	0	1	0	0	0	3	3
672	1	0	0	0	0	0	0	1	2	5
673	2	0	0	0	1	0	1	0	3	5
674	1	0	0	0	0	0	0	0	2	2
675	1	0	0	0	1	0	0	1	2	4
676	1	0	0	0	1	0	1	0	3	4
677	0	0	0	0	0	0	0	0	2	3
678	0	0	0	0	1	0	0	0	2	3
679	2	0	0	0	1	0	0	0	3	4
680	1	0	0	0	0	0	0	0	3	4
681	2	0	0	0	0	0	0	0	2	3
682	1	0	0	0	1	0	0	0	1	3
683	2	1	0	0	1	0	1	1	4	1
684	2	0	0	0	1	0	0	0	3	3
685	0	0	0	0	1	0	0	0	3	1
686	0	0	0	0	0	0	0	0	2	3
687	2	0	0	0	1	0	0	0	3	4
688	1	0	0	0	0	0	1	0	3	5
689	1	0	0	0	0	0	1	1	3	5
690	2	0	0	0	0	0	0	1	3	3
691	0	0	0	0	1	0	1	0	1	5
692	2	0	0	0	0	0	0	1	2	0
693	1	0	0	0	0	0	0	0	1	3
694	1	0	0	0	0	0	1	0	1	3
695	2	0	0	0	1	0	0	0	2	1
696	2	0	0	0	0	0	0	1	2	2
697	1	0	0	0	1	0	0	0	2	3
698	1	0	0	0	1	0	0	0	3	4
699	2	0	0	0	0	0	0	0	3	2
700	1	0	0	0	0	0	1	0	2	2
701	1	0	0	0	1	0	0	1	1	2
702	2	0	0	0	0	0	0	1	2	3
703	2	0	0	0	0	0	0	0	4	3
704	1	0	0	0	1	0	0	0	3	3
705	0	0	0	1	1	0	0	0	2	4
706	2	0	0	1	0	0	0	1	3	5
707	1	0	0	1	1	0	0	1	2	3
708	1	0	0	1	1	0	0	1	2	3
709	2	0	0	0	0	0	0	1	3	4
710	0	0	0	1	0	0	0	1	2	3
711	2	0	0	0	1	0	0	0	3	2
712	1	0	0	1	1	0	0	0	0	2
713	2	0	0	1	1	0	0	0	3	3
714	1	0	0	0	1	0	0	1	2	1
715	1	0	0	1	0	0	0	0	1	5
716	2	0	0	1	1	0	0	0	0	4
717	1	0	0	0	0	0	0	0	3	2
718	1	0	0	0	1	0	0	0	5	2
719	1	0	0	0	0	0	0	0	2	4
720	2	0	0	0	1	0	0	1	2	4
721	0	0	0	0	1	0	0	0	4	3
722	1	0	0	0	1	0	0	0	3	2
723	0	0	0	0	0	0	0	1	1	3
724	0	0	0	0	1	0	0	0	1	3
725	1	0	0	0	0	0	0	0	1	3
726	1	0	0	0	1	0	0	0	2	2
727	0	0	0	0	0	0	0	1	2	3
728	2	0	0	0	1	0	0	1	2	2
729	1	0	0	0	0	0	0	0	1	2
730	1	0	0	0	1	0	0	0	1	3
731	1	0	0	0	1	0	0	0	2	4
732	2	0	0	0	0	0	0	0	4	3
733	0	0	0	0	0	0	0	0	0	3
734	1	0	0	0	0	0	0	0	2	2
735	1	0	0	0	1	0	0	1	1	3
736	1	0	0	0	0	0	0	1	2	3
737	1	0	0	0	0	0	0	0	2	2
738	1	0	0	0	1	0	0	0	2	2
739	1	0	0	0	0	0	0	1	1	3
740	2	0	0	0	1	0	0	0	4	4
741	1	1	0	0	0	0	0	0	2	2
742	0	0	0	0	0	0	0	1	3	3
743	2	0	0	0	1	0	0	0	2	2
744	1	0	0	0	0	0	0	0	2	2
745	1	0	0	0	0	0	0	0	4	1
746	3	0	0	0	1	0	0	0	1	2
747	1	0	0	0	0	0	0	0	1	0
748	0	0	0	0	0	0	0	1	2	2
749	1	0	0	0	0	0	0	0	0	2
750	1	0	0	0	1	0	0	0	2	4
751	1	0	0	0	0	0	0	0	1	3
752	1	0	0	0	0	0	0	1	1	3
753	1	0	0	0	1	0	0	0	3	2
754	1	0	0	0	1	0	0	1	2	2
755	1	0	0	0	0	0	0	0	3	2
756	2	0	0	0	0	0	0	0	2	2
757	1	0	0	0	1	0	0	0	1	3
758	2	0	0	0	0	0	0	0	4	2
759	1	0	0	0	1	0	0	0	6	1
760	1	0	0	0	0	0	0	0	1	3
761	1	0	0	0	1	0	0	1	2	4
762	1	0	0	0	1	0	0	1	4	2
763	1	0	0	0	1	0	0	0	2	2
764	1	0	0	0	0	0	0	0	2	3
765	1	0	0	0	1	0	0	1	3	2
766	1	0	0	0	1	0	0	1	1	3
767	1	0	0	0	0	0	0	1	2	3
768	0	0	0	0	1	0	0	0	1	2
769	1	0	0	0	1	0	0	0	2	2
770	1	0	0	0	1	0	0	0	1	4
771	1	0	0	0	1	0	0	1	1	3
772	0	0	0	0	0	0	0	0	3	2
773	1	0	0	0	0	0	0	0	1	1
774	1	0	0	0	1	0	0	1	3	3
775	0	0	0	0	0	0	0	1	2	2
776	0	0	0	0	1	0	0	0	3	4
777	0	0	0	0	0	0	0	1	2	2
778	1	0	0	0	1	0	0	0	2	3
779	1	0	0	0	0	0	0	1	2	3
780	1	0	0	0	1	0	0	0	2	4
781	1	0	0	0	0	0	0	1	2	3
782	0	0	0	1	0	0	0	1	1	3
783	1	0	0	0	1	0	0	0	2	4
784	0	0	0	0	0	0	0	1	2	3
785	1	0	0	0	0	0	0	0	5	1
786	1	0	0	0	1	0	0	1	2	3
787	1	0	0	0	1	0	0	0	2	3
788	1	0	0	0	1	0	0	0	3	3
789	1	0	0	0	1	0	0	0	2	4
790	1	0	0	0	0	0	0	1	3	4
791	2	0	0	0	0	0	0	0	2	2
792	1	0	0	0	1	0	0	0	2	3
793	1	0	0	0	0	0	0	0	1	2
794	2	0	0	0	0	0	0	1	1	2
795	1	0	0	0	1	0	0	0	3	4
796	0	0	0	0	0	0	0	1	3	1
797	1	0	0	0	0	0	0	0	0	2
798	1	0	0	0	1	0	0	0	4	3
799	2	0	0	0	0	0	0	0	3	1
800	1	0	0	0	1	0	0	1	1	2
801	1	0	0	0	1	0	0	1	3	2
802	1	0	0	0	0	0	0	1	1	3
803	0	0	0	0	1	0	0	0	3	2
804	2	0	0	0	0	0	0	1	1	3
805	0	0	0	0	1	0	0	0	2	1
806	1	0	0	0	0	0	0	0	3	3
807	1	0	0	0	1	0	0	0	2	3
808	1	0	0	0	0	0	0	0	2	3
809	1	0	0	0	0	0	0	0	2	3
810	2	0	0	0	1	0	0	1	2	2
811	0	0	0	0	0	0	0	1	3	2
812	2	0	0	0	1	0	0	1	1	2
813	1	0	0	0	1	0	0	0	2	5
814	2	0	0	0	0	0	0	1	4	2
815	1	0	0	0	1	0	0	1	2	4
816	2	0	0	0	1	0	0	1	3	2
817	2	0	0	0	0	0	0	1	2	3
818	1	0	0	0	0	0	0	1	2	3
819	1	0	0	0	0	0	0	0	1	2
820	0	0	0	0	1	0	0	0	0	2
821	1	0	0	0	0	0	0	1	3	4
822	1	0	0	0	0	0	0	0	2	3
823	1	0	0	0	0	0	0	0	1	2
824	1	0	0	0	0	0	0	0	1	1
825	0	0	0	0	1	0	0	1	2	3
826	0	0	0	0	0	0	0	0	3	1
827	1	0	0	0	0	0	0	0	3	2
828	0	0	0	0	0	0	0	0	4	3
829	1	0	0	0	1	0	0	1	5	4
830	1	0	0	0	1	0	0	0	3	2
831	1	0	0	0	0	0	0	1	3	1
832	0	0	0	0	0	0	0	0	2	3
833	1	0	0	0	0	0	0	0	3	1
834	1	0	0	0	0	0	0	0	2	2
835	1	0	0	0	0	0	0	1	2	5
836	1	0	0	0	0	0	0	0	3	2
837	1	0	0	0	1	0	0	0	2	3
838	1	0	0	0	0	0	0	0	2	3
839	1	0	0	0	1	0	0	1	1	1
840	1	0	0	0	0	0	0	1	3	1
841	0	0	0	0	1	0	0	1	2	0
842	0	0	0	0	0	0	0	1	3	2
843	0	0	0	0	0	0	0	1	4	2
844	0	0	0	0	0	0	0	0	3	3
845	1	0	0	0	1	0	0	1	4	3
846	1	0	0	0	0	0	0	0	2	4
847	1	0	0	0	0	0	0	0	2	3
848	1	0	0	0	1	0	0	0	2	4
849	0	0	0	0	0	0	0	1	3	2
850	1	1	0	0	1	0	0	0	1	2
851	1	0	0	0	0	0	0	0	2	2
852	1	0	0	0	1	0	0	1	1	3
853	0	0	0	0	0	0	0	1	4	2
854	0	0	0	0	0	0	0	0	5	3
855	0	0	0	0	1	0	0	1	4	3
856	1	0	0	0	0	0	0	0	3	2
857	1	0	0	0	0	0	0	0	4	2
858	0	0	0	0	1	0	0	0	3	2
859	1	0	0	0	1	0	0	0	3	3
860	1	0	0	0	0	0	0	0	1	2
861	0	0	0	0	1	0	0	1	3	3
862	1	0	0	0	0	0	0	0	1	3
863	1	0	0	0	0	0	0	1	2	2
864	1	0	0	0	1	0	0	0	3	3
865	1	0	0	0	1	0	0	0	3	3
866	1	0	0	0	0	0	0	0	3	2
867	1	0	0	0	0	0	0	1	4	4
868	1	0	0	0	0	0	0	0	2	0
869	1	0	0	0	1	0	0	1	1	6
870	1	0	0	0	0	0	0	1	1	3
871	0	0	0	0	1	0	0	0	4	4
872	1	0	0	0	0	0	0	0	2	2
873	0	0	0	0	1	0	0	0	3	3
874	0	0	0	0	1	0	0	0	1	4
875	0	0	0	0	1	0	0	1	4	4
876	1	0	0	0	0	0	0	0	1	5
877	0	0	0	0	0	0	0	0	1	5
878	1	0	0	0	0	0	0	0	3	2
879	0	0	0	0	1	0	0	0	2	4
880	0	0	0	0	0	0	0	0	4	2
881	1	0	0	0	0	0	0	0	1	5
882	0	0	0	0	1	0	0	1	3	3
883	1	0	0	0	0	0	0	1	3	4
884	1	0	0	0	0	0	0	0	2	5
885	0	0	0	0	1	0	0	0	1	6
886	0	0	0	0	0	0	0	0	3	3
887	0	0	0	0	0	0	0	1	2	4
888	1	0	0	0	1	0	0	1	1	5
889	1	0	0	0	0	0	0	0	2	4
890	0	0	0	0	1	0	0	1	4	3
891	0	0	0	0	1	0	0	0	2	3
892	0	0	0	0	0	0	0	1	1	3
893	0	0	0	0	0	0	0	0	1	3
894	0	0	0	0	1	0	0	0	3	4
895	1	0	0	0	0	0	0	1	2	3
896	1	0	0	0	0	0	0	1	2	3
897	0	0	0	0	1	0	0	1	2	3
898	0	0	0	0	0	0	0	0	3	3
899	1	0	0	0	1	0	0	0	3	3
900	0	0	0	0	1	0	0	1	4	2
901	0	0	0	0	0	0	0	1	3	4
902	1	0	0	0	1	0	0	1	2	5
903	1	0	0	0	1	0	0	1	1	4
904	1	0	0	0	1	0	0	0	3	4
905	1	0	0	0	1	0	0	0	2	3
906	1	0	0	0	1	0	0	0	2	5
907	1	0	0	0	1	0	0	0	2	3
908	0	0	0	0	1	0	0	0	1	3
909	0	0	0	0	1	0	0	0	1	4
910	0	0	0	0	1	0	0	0	2	5
911	1	0	0	0	1	0	0	1	2	5
912	0	0	0	0	0	0	0	0	3	4
913	1	0	0	0	0	0	0	0	2	1
914	0	0	0	0	1	0	0	1	4	6
915	1	0	0	0	1	0	0	0	2	3
916	0	0	0	0	1	0	0	1	3	3
917	0	0	0	0	1	0	0	1	2	4
918	1	0	0	0	0	0	0	0	3	2
919	0	0	0	0	0	0	0	1	5	3
920	1	0	0	0	1	0	0	1	2	3
921	0	1	0	0	0	0	0	1	1	4
922	0	0	0	0	0	0	0	0	3	4
923	1	0	0	0	0	0	0	0	4	5
924	1	0	0	0	0	0	0	0	4	4
925	0	0	0	0	0	0	0	1	2	4
926	1	1	0	0	0	0	0	0	5	1
927	2	0	0	0	0	0	0	0	1	5
928	1	1	0	0	0	0	0	0	3	5
929	0	0	0	0	0	0	0	0	2	3
930	1	0	0	0	0	0	0	1	3	3
931	1	0	0	0	0	0	0	1	4	2
932	1	0	0	0	0	0	0	1	4	3
933	1	1	0	0	0	0	0	0	3	4
934	2	0	0	0	0	0	0	0	3	3
935	1	1	0	0	0	0	0	1	1	3
936	2	1	0	0	0	0	0	1	2	4
937	1	1	0	0	0	0	0	0	2	3
938	0	0	0	0	0	0	0	0	1	4
939	0	0	0	0	0	0	0	1	4	1
940	2	1	0	0	0	0	0	0	5	3
941	1	1	0	0	0	0	0	1	0	3
942	0	0	0	0	0	0	0	0	4	3
943	1	1	0	0	0	0	0	0	3	4
944	2	1	0	0	0	0	0	0	2	5
945	0	0	0	0	0	0	0	1	1	1
946	1	0	0	0	0	0	0	0	2	6
947	1	0	0	0	0	0	0	1	2	4
948	1	0	0	0	0	0	0	1	2	4
949	1	0	0	0	0	0	0	1	1	5
950	0	0	0	0	0	0	0	0	3	4
951	1	0	0	0	0	0	0	1	2	2
952	1	1	0	1	0	0	0	0	2	5
953	1	0	0	0	0	0	0	0	2	4
954	1	0	0	0	0	0	0	1	4	2
955	0	1	0	0	0	0	0	1	1	3
956	1	1	0	0	0	0	0	1	1	5
957	1	0	0	0	0	0	0	0	2	2
958	1	0	0	0	0	0	0	0	3	5
959	1	1	0	0	0	0	0	1	2	5
960	1	1	0	0	0	0	0	0	2	3
961	1	0	0	0	0	0	0	0	4	3
962	0	1	0	0	0	0	0	1	3	4
963	1	1	0	0	0	0	0	0	1	3
964	0	0	0	0	0	0	0	1	1	4
965	0	0	0	0	0	0	0	0	2	3
966	0	0	0	0	0	0	0	0	2	3
967	1	1	0	0	0	0	0	0	2	2
968	1	0	0	0	0	0	0	0	2	3
969	1	1	0	0	0	0	0	0	3	4
970	1	0	0	0	0	0	0	0	2	2
971	1	1	0	0	0	0	0	0	4	3
972	1	0	0	0	0	0	0	0	4	4
973	1	1	0	0	0	0	0	1	2	2
974	0	0	0	0	1	0	0	0	1	2
975	1	0	0	0	0	0	0	0	1	4
976	2	0	0	0	0	0	0	0	3	4
977	2	1	0	0	0	0	0	0	1	4
978	1	1	0	0	0	0	0	0	3	2
979	1	1	0	0	0	0	0	0	2	4
980	0	1	0	0	0	0	0	0	4	3
981	1	0	0	0	0	0	0	0	1	4
982	1	0	0	0	0	0	0	0	3	4
983	1	0	0	0	0	0	0	0	2	5
984	1	1	0	0	0	0	0	0	3	5
985	1	0	0	0	1	0	0	0	1	5
986	2	1	0	0	0	0	0	0	3	4
987	0	1	0	0	0	0	0	0	2	4
988	0	0	0	0	0	0	0	0	4	4
989	0	1	0	0	0	0	0	0	2	5
990	1	1	0	0	0	0	0	0	1	4
991	0	1	0	0	0	0	0	0	2	1
992	1	0	0	0	0	0	0	0	2	0
993	1	0	0	0	0	0	0	0	1	3
994	1	1	0	0	0	0	0	0	4	4
995	0	1	0	0	0	0	0	0	1	5
996	1	1	0	0	0	0	0	0	3	3
997	1	0	0	0	0	0	0	0	3	4
998	1	1	0	0	1	0	0	0	0	3
999	0	1	0	0	0	0	0	0	2	2
1000	1	0	0	0	0	0	0	0	3	3
1001	0	0	0	0	0	0	0	0	3	5
1002	1	1	0	0	0	0	0	0	2	4
1003	0	1	0	0	0	0	0	0	4	2
1004	2	1	0	0	0	0	0	0	3	4
1005	2	0	0	0	0	0	0	0	2	4
1006	1	0	0	0	0	0	0	0	2	3
1007	1	1	0	0	0	1	0	0	5	3
1008	2	1	0	0	0	0	0	0	3	4
1009	2	0	0	0	0	0	0	0	4	5
1010	1	1	0	0	0	0	0	0	1	5
1011	0	0	0	0	0	0	0	0	2	5
1012	1	0	0	0	0	0	0	1	0	2
1013	1	0	0	0	0	0	0	0	3	4
1014	1	1	0	0	0	0	0	0	5	4
1015	2	1	0	0	0	0	0	0	0	4
1016	1	1	0	0	1	0	0	0	3	5
1017	0	0	0	0	1	0	0	0	2	3
1018	1	0	0	0	0	0	0	0	3	3
1019	0	0	0	0	0	0	0	1	3	2
1020	1	1	0	0	0	0	0	0	2	5
1021	1	1	0	0	0	0	0	0	1	2
1022	1	0	0	0	0	0	0	0	3	4
1023	1	1	0	0	0	0	0	0	4	3
1024	1	0	0	0	0	0	0	1	4	5
1025	0	0	0	0	0	0	0	0	0	5
1026	2	1	0	0	0	0	0	0	1	4
1027	0	1	0	0	0	0	0	0	3	3
1028	1	0	0	0	0	0	0	0	2	3
1029	1	0	0	0	0	0	0	0	3	5
1030	1	1	0	0	0	0	0	0	2	5
1031	0	1	0	0	0	0	0	0	3	4
1032	0	0	0	0	0	0	0	0	2	5
1033	1	1	0	0	0	0	0	0	3	5
1034	1	1	0	0	0	0	0	0	1	4
1035	0	1	0	0	0	0	0	0	3	4
1036	0	1	0	0	0	0	0	0	5	3
1037	0	0	0	0	0	0	0	1	2	3
1038	0	1	0	0	0	0	0	1	2	4
1039	1	0	0	0	0	0	0	0	3	2
1040	1	0	0	0	0	0	0	0	1	4
1041	0	0	0	0	0	0	0	1	4	2
1042	0	1	0	0	0	0	0	2	3	2
1043	0	0	0	0	0	0	0	0	1	2
1044	1	1	0	0	0	0	0	0	3	5
1045	1	2	0	0	0	0	0	0	1	2
1046	1	0	0	0	0	0	0	1	2	3
1047	1	1	0	0	0	0	0	0	3	3
1048	1	0	0	0	0	0	0	0	1	4
1049	1	0	0	0	0	0	0	0	3	3
1050	1	0	0	0	0	0	0	0	3	1
1051	0	1	0	0	0	0	0	0	0	4
1052	1	1	0	0	0	0	0	0	3	5
1053	0	0	0	0	1	0	0	0	3	5
1054	0	0	0	0	0	1	0	0	2	3
1055	0	0	0	0	0	1	0	0	1	2
1056	0	0	0	0	0	0	0	0	4	2
1057	0	0	0	0	0	0	0	0	2	3
1058	1	0	0	0	0	0	0	0	4	3
1059	1	1	0	0	0	0	0	1	3	2
1060	1	1	0	0	0	0	0	0	5	3
1061	1	0	0	0	0	0	0	0	3	3
1062	0	0	0	0	0	0	0	0	2	2
1063	1	0	0	0	0	0	0	0	3	3
1064	0	0	0	0	0	0	0	0	2	4
1065	1	0	0	0	0	0	0	0	3	3
1066	1	0	0	0	0	0	0	0	2	6
1067	1	0	0	0	0	0	0	0	4	4
1068	1	0	0	0	0	0	0	0	1	5
1069	0	0	0	0	0	0	0	0	2	1
1070	1	0	0	0	1	0	0	0	1	2
1071	0	0	0	0	1	0	0	0	2	4
1072	0	1	0	0	1	0	0	0	2	5
1073	1	0	0	0	0	0	0	0	0	3
1074	1	0	0	0	0	0	0	0	3	4
1075	0	0	0	0	1	0	0	0	1	3
1076	1	0	0	0	0	0	0	0	4	2
1077	1	0	0	0	0	0	0	0	2	3
1078	0	0	0	0	0	0	0	0	2	4
1079	1	0	0	0	0	0	0	0	3	4
1080	1	0	0	0	0	0	0	0	2	3
1081	1	0	0	0	1	0	0	0	3	4
1082	1	0	0	0	0	0	0	0	2	3
1083	1	0	0	0	0	0	0	0	1	5
1084	1	0	0	0	1	0	0	0	2	3
1085	1	0	0	0	1	0	0	0	3	5
1086	0	0	0	0	0	0	0	0	1	2
1087	0	0	0	0	1	0	0	0	1	2
1088	0	0	0	0	1	0	0	0	5	3
1089	1	0	0	0	0	0	0	0	2	2
1090	0	0	0	0	1	0	0	0	4	5
1091	0	0	0	0	1	0	0	0	2	2
1092	0	0	0	0	0	0	0	0	3	4
1093	1	0	0	0	0	0	0	0	2	3
1094	0	0	0	0	1	0	0	0	3	4
1095	0	0	0	0	0	0	0	0	4	4
1096	1	0	0	0	0	0	0	1	2	4
1097	1	0	0	0	0	0	0	0	3	3
1098	0	0	0	0	1	0	0	0	3	5
1099	0	0	0	0	2	0	0	0	3	2
1100	1	0	0	0	1	0	0	0	1	4
1101	1	0	0	0	0	0	0	0	5	3
1102	0	0	0	0	0	0	0	0	2	4
1103	1	0	0	0	1	0	0	0	3	4
1104	0	0	0	0	1	0	0	0	1	5
1105	0	0	0	0	0	0	0	0	2	3
1106	1	0	0	0	0	0	0	0	3	2
1107	0	0	0	0	1	0	0	0	5	4
1108	0	0	0	0	1	0	0	0	3	4
1109	0	0	0	0	1	0	0	0	1	2
1110	1	0	0	0	0	0	0	0	3	5
1111	1	0	0	0	0	0	0	0	3	4
1112	0	0	0	0	1	0	0	0	5	4
1113	1	0	0	0	0	0	0	0	2	3
1114	1	0	0	0	0	0	0	0	1	3
1115	1	0	0	0	0	0	0	0	3	4
1116	1	1	0	0	2	0	0	0	4	4
1117	0	0	0	0	1	0	0	0	2	2
1118	0	0	0	0	1	0	0	0	2	3
1119	1	0	0	0	0	0	0	0	2	2
1120	1	0	0	0	0	0	0	0	2	2
1121	1	0	0	0	1	0	0	0	5	4
1122	0	0	0	0	1	0	0	0	4	5
1123	1	0	0	0	1	0	0	0	3	4
1124	1	0	0	0	0	0	0	0	4	3
1125	1	0	0	0	0	0	0	0	2	3
1126	0	0	0	0	1	0	0	0	4	3
1127	0	0	0	0	0	0	0	0	2	4
1128	1	0	0	0	1	0	0	0	3	5
1129	0	0	0	0	1	0	0	0	3	4
1130	1	0	0	0	0	0	0	0	1	3
1131	0	0	0	0	1	0	0	0	3	2
1132	1	0	0	0	1	0	0	0	2	3
1133	1	0	0	0	1	0	0	0	3	3
1134	1	0	0	0	0	0	0	1	4	1
1135	1	0	0	0	1	0	0	0	1	4
1136	1	0	0	0	0	0	0	0	4	3
1137	0	0	0	0	0	0	0	0	0	3
1138	1	0	0	0	1	0	0	0	1	4
1139	1	0	0	0	0	0	0	0	1	3
1140	0	0	0	0	1	0	0	0	2	4
1141	1	0	0	0	1	0	0	0	4	3
1142	0	0	0	0	1	0	0	0	4	3
1143	0	0	0	0	0	0	0	0	5	5
1144	0	0	0	0	0	0	0	1	1	5
1145	1	0	0	0	1	0	0	0	2	5
1146	1	0	0	0	0	0	0	0	2	4
1147	0	0	0	0	1	0	0	0	4	4
1148	1	0	0	0	1	0	0	0	2	3
1149	1	0	0	0	0	0	0	0	1	3
1150	1	0	0	0	1	0	0	0	3	2
1151	0	0	0	0	1	0	0	0	3	3
1152	1	0	0	0	0	0	0	0	0	2
1153	1	0	0	0	0	0	0	0	4	4
1154	1	0	0	0	0	0	0	1	3	3
1155	1	0	0	0	1	0	0	1	3	4
1156	0	1	0	0	0	0	0	0	2	4
1157	0	0	0	0	1	0	0	0	3	1
1158	1	0	0	0	0	0	0	0	3	2
1159	0	0	0	0	1	0	0	0	3	3
1160	0	0	0	0	0	0	0	0	2	5
1161	0	0	0	0	1	0	0	0	2	4
1162	1	0	0	0	0	0	0	0	2	4
1163	1	0	0	0	1	0	0	0	5	4
1164	0	0	0	0	0	0	0	0	1	5
1165	1	0	0	0	1	0	0	0	2	3
1166	1	0	0	0	1	0	0	0	5	3
1167	0	0	0	0	1	0	0	0	1	2
1168	0	0	0	0	1	0	0	0	2	2
1169	1	0	0	0	0	0	0	0	3	3
1170	1	0	0	0	1	0	0	0	3	4
1171	1	0	0	0	1	0	0	0	3	2
1172	0	0	0	0	1	0	1	0	2	3
1173	1	0	0	0	0	0	0	0	2	3
1174	0	0	0	0	2	0	0	0	0	3
1175	0	0	0	0	1	0	0	0	1	0
1176	0	0	0	0	1	0	0	0	2	4
1177	0	0	0	0	1	0	0	0	1	3
1178	0	0	0	0	2	0	0	0	2	2
1179	0	0	0	0	1	0	0	0	3	5
1180	1	0	0	0	1	0	0	0	3	2
1181	1	0	0	0	1	0	0	0	2	2
1182	1	0	0	0	1	0	0	0	4	2
1183	0	0	0	0	0	0	0	0	3	4
1184	1	0	0	0	0	0	0	0	4	2
1185	0	0	0	0	0	0	0	0	3	4
1186	0	0	0	0	1	0	1	0	2	3
1187	1	0	0	0	0	0	0	0	3	4
1188	0	0	0	0	1	0	0	0	3	3
1189	1	0	0	0	1	0	0	0	3	2
1190	1	0	0	0	1	0	0	0	4	4
1191	0	0	0	0	0	0	0	0	4	5
1192	1	0	0	0	1	0	0	0	3	2
1193	1	0	0	0	1	0	0	0	3	4
1194	1	0	0	0	1	0	0	0	3	2
1195	1	0	0	0	1	0	0	0	3	1
1196	1	0	0	0	1	0	0	0	3	3
1197	1	0	0	0	1	0	0	0	4	5
1198	0	0	0	0	1	0	0	0	4	4
1199	1	0	0	0	1	0	0	1	1	4
1200	1	0	0	0	0	0	0	0	4	3
1201	0	0	0	0	0	0	0	0	3	3
1202	0	0	0	0	1	0	0	0	2	4
1203	0	0	0	0	1	0	0	0	3	1
1204	1	0	0	0	1	0	0	0	4	6
1205	0	0	0	0	0	0	0	0	3	2
1206	1	0	0	0	1	0	1	0	2	4
1207	0	0	0	0	0	0	0	0	1	5
1208	1	1	0	0	0	0	0	1	0	3
1209	0	0	0	0	1	0	0	1	1	3
1210	1	0	0	0	0	0	0	0	2	3
1211	0	0	0	0	0	0	0	0	2	3
1212	1	0	0	0	0	0	0	0	5	5
1213	1	0	0	0	0	0	0	0	2	3
1214	0	0	0	0	0	0	0	0	1	4
1215	0	0	0	0	0	0	1	0	0	4
1216	0	0	0	0	0	0	0	0	2	3
1217	0	0	0	0	0	0	1	0	3	4
1218	0	0	0	0	0	0	0	0	1	4
1219	1	0	0	0	1	0	0	0	3	4
1220	1	0	0	0	0	0	0	0	3	5
1221	0	0	0	0	0	0	0	0	3	2
1222	1	0	0	0	0	0	0	0	2	4
1223	0	0	0	0	1	0	0	0	3	5
1224	1	0	0	0	1	0	1	0	0	2
1225	0	0	0	0	1	0	0	0	3	2
1226	1	0	0	0	0	0	0	0	2	3
1227	0	0	0	0	0	0	0	0	3	2
1228	0	0	0	0	1	0	0	0	2	4
1229	1	0	0	0	0	0	0	0	2	4
1230	0	0	0	0	1	0	0	0	1	1
1231	0	0	0	0	0	0	0	0	2	3
1232	0	0	0	0	0	0	0	0	2	2
1233	0	0	0	0	0	0	0	0	3	2
1234	0	0	0	0	2	0	0	0	4	3
1235	1	0	0	0	1	0	0	0	1	4
1236	1	0	0	0	1	0	0	0	1	3
1237	0	0	0	0	1	0	0	0	3	3
1238	0	0	0	0	0	0	0	0	1	4
1239	1	0	0	0	1	0	0	0	4	2
1240	1	0	0	0	1	0	0	0	3	3
1241	1	0	0	0	0	0	0	0	2	3
1242	1	0	0	0	0	0	0	0	5	4
1243	1	0	0	0	0	0	0	0	4	3
1244	1	0	0	0	1	0	0	0	4	5
1245	0	0	1	0	0	0	0	0	3	4
1246	0	0	1	0	0	0	0	0	2	3
1247	0	0	0	1	1	0	0	0	5	1
1248	0	0	0	1	1	0	0	0	4	5
1249	1	0	1	1	0	0	0	0	4	2
1250	0	0	1	0	1	0	0	0	2	3
1251	1	0	1	0	1	0	0	0	1	4
1252	1	0	1	0	0	0	0	0	1	1
1253	1	0	1	0	0	0	0	1	2	4
1254	1	0	1	0	0	0	0	0	1	4
1255	1	0	1	0	0	0	0	0	3	2
1256	1	0	1	0	1	0	0	0	0	4
1257	0	0	1	0	1	0	0	0	3	3
1258	1	0	0	0	1	0	0	0	2	3
1259	1	0	1	0	0	0	0	0	4	4
1260	1	0	0	0	1	0	0	0	2	4
1261	1	0	1	0	0	0	0	0	1	5
1262	1	0	1	0	1	0	0	0	1	4
1263	0	0	1	0	0	0	0	0	3	3
1264	1	1	1	0	0	0	0	0	1	4
1265	1	0	2	0	0	0	0	1	5	3
1266	1	0	2	0	0	0	0	0	3	3
1267	0	0	2	0	0	0	0	0	2	5
1268	1	1	2	0	0	0	0	0	1	4
1269	0	0	2	1	0	0	0	0	5	4
1270	1	0	1	0	0	0	0	0	1	3
1271	1	0	1	0	0	0	0	0	2	3
1272	0	1	0	0	0	0	0	0	4	3
1273	0	0	1	0	0	0	0	0	4	3
1274	0	0	2	1	0	0	0	0	2	1
1275	1	0	2	0	0	0	0	0	2	2
1276	1	0	1	0	0	0	0	0	2	4
1277	1	0	1	0	0	0	0	0	1	3
1278	1	0	1	0	0	0	0	0	2	4
1279	0	0	0	1	0	0	0	0	1	4
1280	1	0	0	1	0	0	0	0	2	3
1281	0	0	0	1	0	0	0	0	1	4
1282	0	0	1	0	0	0	0	0	2	5
1283	1	1	1	1	0	0	0	0	3	2
1284	1	0	0	1	0	0	0	0	2	3
1285	1	1	0	1	0	0	0	0	1	3
1286	1	0	0	0	0	0	0	0	1	3
1287	1	0	0	0	0	0	0	0	3	5
1288	1	0	0	0	0	0	0	0	3	4
1289	0	0	0	0	0	0	0	0	2	3
1290	1	0	0	0	0	0	0	0	3	2
1291	0	0	0	0	0	0	0	0	1	2
1292	0	0	0	0	0	0	0	0	1	4
1293	0	1	0	0	0	0	0	0	3	2
1294	1	1	0	0	0	0	0	1	2	4
1295	1	1	0	0	0	0	0	0	3	1
1296	1	1	0	0	0	0	0	0	2	4
1297	1	0	0	0	0	0	0	0	1	4
1298	0	0	0	0	0	0	0	0	2	3
1299	0	0	0	0	0	0	0	0	3	3
1300	0	1	0	0	0	0	0	0	2	2
1301	1	0	0	0	0	0	0	0	2	5
1302	0	0	0	0	0	0	0	0	1	3
1303	1	0	0	0	1	0	0	0	2	3
1304	1	1	0	0	0	0	0	0	4	4
1305	1	1	0	0	0	0	0	0	2	3
1306	0	0	0	0	0	0	0	0	3	2
1307	1	1	0	0	1	0	0	0	2	4
1308	0	0	0	0	1	0	0	0	1	3
1309	1	1	0	0	1	0	0	0	4	3
1310	1	1	0	0	0	0	1	0	0	3
1311	0	0	0	0	0	0	0	0	3	3
1312	0	0	0	0	0	0	0	0	3	3
1313	0	0	0	0	0	0	0	1	1	2
1314	1	0	0	0	0	0	0	1	2	3
1315	1	0	0	0	0	0	0	1	1	3
1316	0	0	0	0	0	0	0	1	1	5
1317	1	0	0	0	0	0	0	0	2	4
1318	1	1	0	0	0	0	0	0	3	2
1319	1	0	0	0	0	0	0	1	2	4
1320	0	2	0	0	0	0	0	1	2	4
1321	1	0	0	0	0	0	0	1	3	3
1322	1	1	0	0	0	0	0	1	5	4
1323	0	0	0	0	0	0	0	1	3	3
1324	0	0	0	0	0	0	0	1	4	4
1325	1	1	0	0	0	0	0	1	2	5
1326	0	1	0	0	0	0	0	1	3	3
1327	1	1	0	0	0	0	0	0	3	4
1328	1	0	0	0	0	0	0	1	2	2
1329	0	1	0	0	0	0	0	0	4	5
1330	0	0	0	0	0	0	0	1	3	5
1331	0	0	0	0	0	0	0	0	4	4
1332	1	0	0	0	0	0	0	1	1	3
1333	0	1	0	0	0	0	0	1	2	5
1334	1	0	0	0	0	0	0	0	2	2
1335	1	0	0	0	0	0	1	1	1	2
1336	1	0	0	0	0	0	0	1	5	3
1337	1	0	0	0	0	0	0	0	1	4
1338	1	0	0	0	0	0	0	1	3	3
1339	1	0	0	0	0	0	0	0	4	3
1340	1	0	0	0	0	0	0	0	4	3
1341	1	0	0	0	0	0	0	1	4	3
1342	1	0	0	0	0	0	0	1	2	4
1343	1	0	0	0	0	0	0	1	5	4
1344	1	0	0	0	0	0	0	0	2	1
1345	1	0	0	0	0	0	0	1	0	2
1346	1	0	0	0	0	0	0	1	3	4
1347	0	0	0	0	0	0	0	0	3	4
1348	0	0	0	0	0	0	0	1	3	4
1349	0	0	0	0	0	0	0	1	2	3
1350	0	0	0	0	0	0	0	1	4	3
1351	1	0	0	0	0	0	0	1	2	1
1352	0	1	0	0	0	0	0	0	3	4
1353	0	0	0	0	0	0	1	2	2	5
1354	1	0	0	0	0	0	1	0	2	3
1355	0	0	0	0	0	0	0	1	3	6
1356	1	0	0	0	0	0	0	0	2	4
1357	1	0	0	0	1	0	0	1	1	5
1358	0	0	0	0	0	0	0	0	3	4
1359	1	0	0	0	1	0	0	1	2	2
1360	1	0	0	0	1	0	0	0	2	2
1361	1	0	0	0	0	0	0	0	1	2
1362	0	0	0	0	1	0	0	0	4	4
1363	0	0	0	0	1	0	0	0	3	3
1364	1	0	0	0	1	0	0	0	3	3
1365	1	0	0	0	1	0	0	0	5	4
1366	0	0	0	0	0	0	0	0	4	0
1367	0	0	0	0	1	0	0	0	3	4
1368	0	0	0	0	1	0	0	1	3	3
1369	1	0	0	0	0	0	0	0	0	4
1370	1	0	0	0	1	0	0	0	3	4
1371	1	0	0	0	0	0	0	1	4	4
1372	1	0	0	0	0	0	0	1	3	4
1373	1	0	0	0	0	0	0	1	1	3
1374	0	0	0	0	0	0	0	1	0	4
1375	1	0	0	0	0	0	0	1	3	6
1376	0	0	0	0	0	0	0	0	2	3
1377	1	0	0	0	0	0	0	1	3	2
1378	1	0	0	0	0	0	0	0	3	5
1379	1	0	0	0	0	0	0	0	3	4
1380	1	0	0	0	0	0	0	0	5	2
1381	1	0	0	0	0	0	0	0	2	4
1382	1	0	0	0	0	0	0	0	3	3
1383	0	0	0	0	0	0	0	0	4	4
1384	1	0	0	0	0	0	0	0	3	4
1385	1	0	0	0	0	0	0	0	2	3
1386	0	0	0	0	0	0	0	0	1	4
1387	1	0	0	0	0	0	0	0	4	2
1388	1	0	0	0	0	0	0	0	1	4
1389	1	0	0	0	0	0	1	0	5	5
1390	1	0	0	0	0	0	0	0	1	4
1391	1	0	0	0	0	0	0	0	1	5
1392	0	0	0	0	0	0	0	0	2	2
1393	1	0	0	0	0	0	0	0	3	2
1394	1	0	0	0	0	0	0	0	4	3
1395	1	0	0	0	1	0	0	0	3	3
1396	1	0	0	0	0	0	0	0	3	4
1397	1	0	0	0	1	0	0	0	4	3
1398	1	0	0	0	1	0	0	0	5	4
1399	2	0	0	1	1	0	0	0	2	3
1400	0	0	0	0	0	0	0	0	2	4
1401	0	0	0	1	0	0	0	0	2	5
1402	0	0	0	1	1	0	0	0	2	2
1403	0	0	0	0	1	0	0	0	2	2
1404	1	0	0	0	1	0	0	0	2	5
1405	1	0	0	0	1	0	1	0	1	4
1406	0	0	0	1	0	0	0	0	5	3
1407	1	0	0	0	1	1	0	0	3	4
1408	1	0	0	0	1	0	0	0	3	3
1409	1	0	0	0	0	0	0	0	4	3
1410	1	0	0	0	0	0	0	0	2	4
1411	0	0	0	0	0	0	0	0	2	2
1412	0	0	0	0	1	0	0	0	2	3
1413	1	0	0	0	1	0	0	0	3	4
1414	1	0	0	0	0	0	0	0	4	3
1415	0	0	0	0	1	0	1	0	2	3
1416	1	0	0	0	0	0	0	0	5	2
1417	1	0	0	1	2	0	0	0	3	3
1418	0	0	0	0	0	0	0	0	3	3
1419	1	0	0	0	0	0	0	0	3	3
1420	0	0	0	0	1	0	0	0	3	4
1421	1	0	0	0	1	0	0	0	2	3
1422	0	0	0	0	0	0	0	0	0	1
1423	1	0	0	0	0	0	0	0	3	3
1424	0	0	0	0	0	0	0	0	2	1
1425	1	0	0	0	1	0	0	0	0	3
1426	1	0	0	0	1	0	0	0	3	5
1427	1	0	0	0	1	0	0	0	2	2
1428	0	0	0	0	0	0	0	0	2	3
1429	1	0	0	0	0	0	0	0	0	3
1430	0	0	0	0	2	0	0	0	3	3
1431	1	0	0	0	1	0	0	0	3	3
1432	1	0	0	0	0	0	0	0	1	4
1433	0	0	0	0	1	0	0	0	0	3
1434	0	0	0	0	2	0	0	0	4	2
1435	0	0	0	0	1	0	0	0	4	4
1436	1	0	0	0	0	0	0	0	2	5
1437	0	0	0	0	0	0	0	0	2	4
1438	0	0	0	0	1	0	0	0	2	3
1439	1	0	0	0	0	0	0	0	1	4
1440	0	0	0	0	1	0	0	0	2	4
1441	0	0	0	0	1	0	0	0	1	5
1442	1	0	0	0	1	0	0	0	3	2
1443	1	0	0	0	1	0	0	0	4	2
1444	1	0	0	0	1	0	0	0	2	2
1445	1	0	0	0	0	0	0	0	1	1
1446	1	0	0	0	1	0	0	0	1	4
1447	0	0	0	0	1	0	0	0	3	1
1448	0	0	0	0	1	0	0	0	2	4
1449	0	0	0	0	1	0	0	0	3	4
1450	1	0	0	0	1	0	0	0	4	4
1451	1	0	0	0	2	0	0	0	3	1
1452	0	0	0	0	0	0	0	0	0	2
1453	1	0	0	1	1	0	0	0	3	3
1454	0	0	0	0	1	0	0	0	2	4
1455	0	0	0	0	0	0	0	0	3	2
1456	1	0	0	0	1	0	0	0	3	3
1457	1	0	0	0	1	0	0	0	2	4
1458	0	0	0	0	0	0	0	0	2	3
1459	0	0	0	0	1	0	0	0	3	4
1460	1	0	0	0	1	0	1	0	2	4
1461	0	0	0	1	0	0	0	0	3	4
1462	0	0	0	1	0	0	0	0	2	3
1463	1	0	0	0	0	0	0	0	3	2
1464	1	0	0	1	1	0	1	0	2	3
1465	0	0	0	0	1	0	0	0	3	3
1466	0	0	0	0	1	0	0	0	1	1
1467	0	0	0	0	0	0	0	0	1	3
1468	1	0	0	0	1	0	0	0	2	4
1469	1	0	0	0	1	0	0	0	1	4
1470	1	0	0	0	0	0	0	0	1	6
1471	1	0	0	0	1	0	0	0	3	2
1472	1	0	0	0	1	0	0	0	3	3
1473	1	0	0	0	1	0	0	0	2	5
1474	1	0	0	0	0	0	0	0	4	4
1475	1	0	0	0	0	0	0	0	2	4
1476	1	0	0	0	2	0	0	0	3	2
1477	1	0	0	0	2	0	0	0	3	2
1478	0	0	0	0	0	0	1	0	2	2
1479	1	0	0	0	0	0	0	0	4	2
1480	0	0	0	0	1	0	0	0	3	4
1481	0	0	0	0	1	0	0	0	3	4
1482	1	0	0	0	1	0	0	0	4	3
1483	1	0	0	0	1	0	1	0	4	3
1484	1	0	0	0	0	0	0	0	3	3
1485	1	0	0	0	1	0	0	0	2	5
1486	0	0	0	0	0	0	0	0	1	5
1487	0	0	0	0	0	0	0	0	3	4
1488	1	0	0	0	0	0	1	0	4	4
1489	0	0	0	0	1	0	0	0	3	4
1490	0	0	0	0	0	0	0	0	0	3
1491	1	0	0	0	1	0	0	0	1	5
1492	1	0	0	0	0	0	0	0	3	3
1493	1	0	0	0	1	0	0	0	2	2
1494	1	0	0	0	1	0	1	0	2	3
1495	0	0	0	0	2	0	0	0	2	4
1496	1	0	0	0	0	0	0	0	2	4
1497	1	0	0	0	2	0	0	0	2	2
1498	1	0	0	0	1	0	0	0	3	4
1499	0	0	0	0	0	0	0	0	2	4
1500	0	0	0	0	2	0	0	0	1	4
1501	1	0	0	0	1	0	0	0	3	1
1502	1	0	0	0	1	0	0	0	3	2
1503	0	0	0	0	1	0	0	0	3	4
1504	1	0	0	0	1	0	0	0	5	3
1505	1	0	0	0	0	0	0	0	3	3
1506	1	1	0	0	1	0	0	0	2	3
1507	0	0	0	0	1	0	0	0	1	2
1508	0	0	0	0	1	0	0	0	3	4
1509	0	0	0	1	1	0	0	0	4	2
1510	1	0	0	0	1	0	0	0	1	1
1511	0	0	0	1	0	0	0	0	2	4
1512	1	0	0	0	1	0	0	0	4	4
1513	2	0	0	0	1	0	0	0	0	4
1514	1	0	0	0	1	0	0	0	3	4
1515	1	0	0	0	2	0	0	0	2	4
1516	1	0	0	1	1	0	0	0	2	2
1517	1	0	0	1	1	0	0	0	4	4
1518	0	1	0	1	1	0	0	0	4	4
1519	0	0	0	0	0	0	0	0	1	3
1520	0	0	0	0	1	0	0	0	2	5
1521	1	0	0	0	1	0	0	0	3	4
1522	1	0	0	1	1	0	0	0	2	3
1523	0	0	0	1	1	0	0	0	5	2
1524	0	0	0	0	0	0	0	0	2	4
1525	1	0	0	0	1	0	0	0	3	3
1526	1	1	0	1	1	0	0	0	3	3
1527	0	0	0	0	1	0	0	0	2	3
1528	0	0	0	0	0	0	0	0	2	5
1529	0	0	0	1	1	0	0	0	4	1
1530	1	0	0	0	0	0	1	0	1	1
1531	1	0	0	0	0	0	0	0	2	4
1532	1	0	0	0	0	0	0	0	4	2
1533	0	0	0	1	1	0	0	0	3	3
1534	1	0	0	0	1	0	0	0	4	4
1535	1	0	0	0	1	0	0	0	3	2
1536	1	0	0	0	0	0	0	0	2	3
1537	1	0	0	0	1	0	0	0	2	2
1538	0	0	0	0	0	0	0	0	1	4
1539	0	0	0	0	1	0	0	0	1	3
1540	1	0	0	0	1	0	0	0	3	4
1541	0	0	0	0	0	0	0	0	2	3
1542	0	0	0	0	1	0	0	0	2	3
1543	0	0	0	0	1	0	0	0	2	4
1544	1	0	0	0	1	0	0	0	3	5
1545	0	0	0	0	0	0	0	0	3	3
1546	0	1	0	0	1	0	0	0	2	6
1547	0	0	0	0	0	0	0	0	3	2
1548	0	0	0	0	0	0	0	0	3	3
1549	0	0	0	0	0	0	0	0	3	5
1550	0	0	0	0	0	0	0	0	3	4
1551	0	0	0	0	0	0	0	0	4	0
1552	0	0	0	0	1	0	0	0	0	2
1553	0	0	0	0	1	0	0	0	2	5
1554	0	0	0	0	0	0	0	0	3	3
1555	0	0	0	0	1	0	0	0	3	4
1556	0	0	0	0	1	0	0	0	0	5
1557	0	0	0	0	0	0	0	0	2	4
1558	0	0	0	0	1	0	0	0	3	4
1559	0	0	0	0	1	0	0	0	4	3
1560	0	0	0	0	1	0	0	1	4	4
1561	0	0	0	0	1	0	0	0	2	4
1562	0	0	0	0	1	0	0	0	2	3
1563	0	0	0	0	0	0	0	0	4	4
1564	0	0	0	0	0	0	0	0	3	3
1565	0	0	0	0	1	0	0	1	2	3
1566	0	0	0	0	0	0	0	0	2	4
1567	0	0	0	0	1	0	0	0	1	4
1568	0	0	0	0	0	0	0	0	3	4
1569	0	0	0	0	0	0	1	0	1	3
1570	0	0	0	0	0	0	0	0	2	4
1571	0	0	0	0	1	0	0	0	1	4
1572	0	0	0	0	1	0	0	0	3	1
1573	0	0	0	0	0	0	0	0	5	4
1574	0	0	0	1	1	0	0	0	1	2
1575	0	0	0	1	1	0	0	0	3	5
1576	0	1	0	1	1	0	0	0	2	4
1577	0	0	0	0	1	0	0	0	2	3
1578	0	0	0	0	1	0	0	0	5	3
1579	0	0	0	1	1	0	0	0	3	2
1580	0	0	0	0	1	0	0	0	1	3
1581	0	0	0	0	0	0	1	0	2	3
1582	0	0	0	1	1	0	0	0	2	5
1583	0	0	0	0	1	0	0	0	4	2
1584	0	0	0	0	1	0	0	0	2	1
1585	0	0	0	1	1	0	0	0	3	3
1586	0	0	0	0	1	0	0	0	1	3
1587	0	0	0	1	1	0	0	0	3	3
1588	0	0	0	0	0	0	1	0	2	0
1589	0	0	0	0	0	0	0	0	3	4
1590	0	0	0	1	0	0	0	0	1	4
1591	0	0	0	1	0	0	0	1	1	2
1592	0	0	0	1	1	0	0	0	3	3
1593	0	0	0	0	0	0	0	0	4	2
1594	0	0	0	0	0	0	0	0	2	3
1595	0	1	0	0	0	0	0	0	3	3
1596	0	0	0	0	0	0	0	0	1	3
1597	0	0	0	1	0	0	0	0	1	1
1598	0	0	0	0	0	0	0	0	3	4
1599	0	0	0	1	0	0	0	0	2	3
1600	0	0	0	0	0	0	0	0	3	2
1601	0	0	0	0	0	0	0	0	3	4
1602	0	0	0	0	1	0	0	0	1	4
1603	0	0	0	1	0	0	0	0	1	3
1604	0	0	0	1	0	0	0	0	2	2
1605	0	0	0	0	0	0	0	0	2	2
1606	0	0	0	1	0	0	0	0	3	5
1607	0	0	0	0	0	0	0	0	2	3
1608	0	0	0	1	0	0	1	0	2	3
1609	0	0	0	0	0	0	0	0	2	4
1610	0	0	0	1	1	0	0	0	1	1
1611	0	0	0	1	0	0	0	0	2	3
1612	0	0	0	1	0	0	0	0	2	3
1613	0	0	0	0	0	0	0	0	2	4
1614	0	0	0	0	0	0	0	0	2	3
1615	0	0	0	0	0	0	0	0	3	2
1616	0	0	0	0	0	0	1	0	1	3
1617	0	0	0	0	1	0	0	0	1	4
1618	0	0	0	0	1	0	0	0	4	3
1619	0	0	0	0	1	0	0	0	3	2
1620	0	0	0	1	0	0	0	0	2	2
1621	0	0	1	1	1	0	0	0	1	3
1622	0	0	0	0	0	0	0	0	2	2
1623	0	0	0	0	0	0	0	0	2	3
1624	0	0	0	1	0	0	0	0	3	4
1625	0	0	0	0	0	0	0	0	1	3
1626	0	0	0	1	0	0	1	0	3	3
1627	0	0	0	0	0	0	0	0	2	1
1628	0	0	0	0	0	0	0	0	3	4
1629	0	0	0	0	0	0	0	0	4	3
1630	0	0	0	1	1	0	0	0	4	4
1631	0	0	0	1	1	0	0	0	2	5
1632	0	0	0	1	1	0	0	0	4	1
1633	0	0	0	0	1	0	0	0	5	3
1634	0	0	0	1	0	0	0	0	2	1
1635	0	0	0	0	1	0	0	0	4	4
1636	0	0	0	1	1	0	0	0	3	3
1637	0	0	0	0	1	0	0	0	3	3
1638	0	0	0	0	0	0	0	0	3	2
1639	0	0	0	1	1	0	0	0	2	2
1640	0	0	0	1	0	0	0	0	2	4
1641	0	0	0	0	1	0	0	0	3	3
1642	0	0	0	0	1	0	0	0	3	1
1643	0	0	0	1	0	0	0	0	5	4
1644	0	0	0	0	1	0	0	0	3	4
1645	0	0	0	0	1	0	0	0	2	3
1646	0	0	0	1	0	0	0	0	4	3
1647	1	0	0	0	0	0	0	0	2	3
1648	0	0	0	0	1	0	0	0	2	1
1649	0	0	0	0	0	0	0	0	4	4
1650	0	0	0	0	1	0	0	0	1	3
1651	0	0	0	1	1	0	0	0	1	2
1652	0	0	0	1	1	0	0	1	4	3
1653	0	0	0	0	1	0	0	0	1	3
1654	0	0	0	0	1	0	0	1	3	4
1655	0	0	0	0	1	0	0	0	1	3
1656	1	0	0	0	1	0	0	0	3	3
1657	1	0	0	1	1	0	0	0	2	4
1658	0	0	0	0	0	0	0	1	2	1
1659	0	0	0	0	1	0	0	0	2	2
1660	0	0	0	0	0	0	0	0	3	5
1661	0	0	0	0	1	0	1	0	2	1
1662	0	1	0	0	1	0	0	0	4	5
1663	0	0	0	0	1	0	0	0	2	4
1664	1	0	0	1	0	0	0	0	4	3
1665	0	0	0	1	0	0	0	0	3	4
1666	1	0	0	0	0	0	0	0	2	3
1667	1	0	0	1	0	0	0	0	0	4
1668	0	0	0	0	1	0	0	0	2	2
1669	0	0	0	0	1	0	0	1	3	4
1670	1	0	0	1	1	0	0	0	2	3
1671	0	0	0	0	0	0	0	0	3	3
1672	1	0	0	1	0	0	0	0	2	2
1673	0	0	0	0	1	0	0	0	2	2
1674	1	0	0	0	1	0	0	0	2	3
1675	0	0	0	0	1	0	0	0	3	2
1676	1	0	0	0	0	0	0	0	3	2
1677	1	0	0	0	0	0	0	0	4	3
1678	0	0	0	1	1	0	0	0	4	3
1679	1	0	0	1	1	0	0	0	2	4
1680	0	0	0	0	0	0	0	0	3	4
1681	0	0	0	0	1	0	0	0	2	2
1682	0	0	0	0	0	0	0	0	4	4
1683	1	2	0	0	0	0	0	0	3	3
1684	0	0	0	1	0	0	0	0	1	6
1685	1	0	0	0	0	0	0	0	4	3
1686	1	0	0	1	0	0	0	0	5	4
1687	0	0	0	0	0	0	0	0	2	3
1688	0	0	0	1	0	0	0	0	3	4
1689	1	0	0	0	0	0	0	0	3	0
1690	0	0	0	0	0	0	0	0	0	2
1691	0	0	0	1	0	0	0	0	2	3
1692	0	0	0	0	0	0	0	0	3	5
1693	0	0	0	0	0	0	0	0	3	3
1694	0	0	0	0	0	0	1	0	3	2
1695	0	0	0	0	0	0	0	0	2	2
1696	0	0	0	0	0	0	0	0	2	3
1697	1	0	0	1	1	0	0	0	1	3
1698	0	0	0	0	1	0	0	0	1	3
1699	0	0	0	0	1	0	0	0	3	3
1700	1	0	0	1	1	0	0	0	3	3
1701	1	0	0	1	1	0	0	0	3	3
1702	1	0	0	0	0	0	0	0	0	3
1703	1	0	0	1	0	0	0	0	1	3
1704	0	0	0	1	1	0	0	0	2	2
1705	0	0	0	0	0	0	0	0	1	5
1706	1	0	0	1	1	0	0	0	3	2
1707	1	0	0	1	1	0	0	0	0	4
1708	1	0	0	0	1	0	0	0	2	4
1709	0	0	0	0	1	0	0	0	1	2
1710	0	0	0	0	0	0	0	0	1	4
1711	1	0	0	0	0	0	0	0	4	1
1712	0	0	0	1	0	0	0	0	1	2
1713	0	0	0	0	1	0	0	0	4	3
1714	1	0	0	0	1	0	0	0	3	3
1715	1	0	0	0	0	0	0	0	1	3
1716	0	0	0	0	0	0	0	0	3	1
1717	0	0	0	1	1	0	0	0	3	2
1718	1	0	0	0	0	0	0	0	2	1
1719	0	1	0	1	2	0	0	0	5	2
1720	1	0	0	0	1	0	0	0	4	3
1721	1	0	0	0	0	0	0	0	2	2
1722	1	0	0	0	1	0	0	0	1	3
1723	0	0	0	0	1	0	0	0	2	1
1724	1	0	0	1	1	0	0	0	3	2
1725	0	0	0	0	2	0	0	0	2	4
1726	1	0	0	0	1	0	0	0	3	3
1727	0	1	0	1	1	0	0	0	5	5
1728	1	0	0	0	1	0	0	0	3	4
1729	0	0	0	1	1	0	0	0	2	3
1730	0	0	0	1	1	0	0	0	3	1
1731	1	0	0	1	0	0	0	0	2	3
1732	1	0	0	1	0	0	0	0	2	3
1733	1	1	0	1	1	0	0	0	3	4
1734	0	1	0	1	0	0	0	0	4	4
1735	0	0	0	0	1	0	0	0	1	3
1736	0	0	0	1	1	0	0	0	3	3
1737	0	0	0	1	1	0	0	0	2	4
1738	0	0	0	0	0	0	0	0	3	2
1739	0	0	0	0	1	0	0	0	2	3
1740	1	0	0	0	2	0	0	0	2	3
1741	0	0	0	0	0	0	0	0	2	1
1742	0	0	0	1	1	0	0	0	1	3
1743	0	1	0	1	1	0	0	0	2	2
1744	0	0	0	1	1	0	0	0	2	3
1745	0	0	0	0	1	0	0	0	4	4
1746	0	1	0	0	0	0	0	0	1	3
1747	0	0	0	1	2	0	1	0	2	3
1748	1	1	0	1	0	0	0	0	0	4
1749	1	0	0	0	2	0	0	0	2	2
1750	0	0	0	0	0	0	0	0	3	4
1751	1	0	0	1	0	0	0	0	1	0
1752	1	0	0	1	0	0	0	0	3	5
1753	0	0	0	0	0	0	0	0	2	3
1754	0	0	0	0	1	0	0	0	6	4
1755	0	0	0	1	1	0	0	0	3	4
1756	0	0	0	1	0	0	0	0	2	3
1757	0	0	0	0	0	0	0	0	1	3
1758	0	0	0	0	1	0	0	0	2	2
1759	0	0	0	0	1	0	0	0	3	4
1760	0	0	0	1	1	0	0	0	3	1
1761	0	0	0	1	0	0	0	0	2	2
1762	0	0	0	0	1	0	0	0	3	6
1763	0	0	0	0	1	0	0	0	2	4
1764	0	0	0	1	1	0	0	0	2	4
1765	0	0	0	1	1	0	0	0	5	4
1766	0	0	0	0	1	0	0	0	2	3
1767	0	0	0	1	0	0	0	0	1	4
1768	0	0	0	1	0	0	0	0	3	3
1769	0	0	0	0	0	0	0	0	4	3
1770	0	0	0	1	0	0	0	0	2	2
1771	0	0	0	1	1	0	0	0	4	4
1772	0	0	0	1	0	0	0	0	0	4
1773	0	0	0	1	1	0	0	0	1	4
1774	0	0	0	1	0	0	0	0	3	1
1775	0	0	0	1	0	0	0	0	3	1
1776	0	0	0	1	1	0	0	0	1	1
1777	0	0	0	1	1	1	0	0	1	1
1778	0	0	0	0	0	0	0	0	2	4
1779	0	0	0	1	2	0	0	0	2	2
1780	0	0	0	0	1	0	0	0	2	1
1781	0	0	0	1	0	0	0	0	2	2
1782	0	0	0	0	1	0	0	0	1	1
1783	1	0	0	0	1	0	0	0	1	4
1784	0	0	0	0	0	0	0	0	2	3
1785	1	0	0	1	1	0	0	0	3	2
1786	1	0	0	0	1	0	0	0	1	4
1787	0	0	0	0	0	0	0	0	2	1
1788	0	0	0	1	0	0	0	0	3	5
1789	0	0	0	0	0	0	0	0	0	4
1790	0	0	0	0	0	0	0	0	1	2
1791	0	0	0	0	0	0	0	0	3	1
1792	1	0	0	1	2	0	0	0	3	2
1793	0	0	0	1	0	0	0	0	4	1
1794	0	0	0	1	1	0	0	0	5	3
1795	0	0	0	0	1	0	0	0	3	3
1796	1	0	0	1	2	0	0	0	3	3
1797	0	0	0	0	1	0	0	0	3	3
1798	1	0	0	0	1	0	0	0	3	3
1799	0	0	0	0	0	0	0	0	2	3
1800	0	1	0	1	0	0	0	0	3	2
1801	0	2	0	1	0	0	0	0	1	5
1802	0	0	0	0	0	0	0	0	4	3
1803	0	0	0	1	0	0	0	0	1	2
1804	0	1	0	1	0	0	0	0	4	5
1805	0	0	0	0	1	0	0	0	2	4
1806	0	1	0	1	1	0	0	0	1	1
1807	0	0	0	1	1	0	0	0	1	3
1808	1	0	0	0	1	0	0	0	2	4
1809	1	1	0	0	1	0	0	0	1	4
1810	1	0	0	0	0	0	0	0	2	2
1811	0	1	0	1	0	0	0	0	3	4
1812	1	1	0	1	0	0	0	0	2	3
1813	0	0	0	1	0	0	0	0	1	3
1814	0	0	0	1	1	0	0	0	3	4
1815	1	1	0	1	1	0	0	0	5	4
1816	0	0	0	0	1	0	0	0	2	3
1817	0	0	0	0	0	0	0	0	1	1
1818	0	0	0	0	0	0	0	0	4	2
1819	0	0	0	0	0	0	0	0	2	4
1820	0	0	0	0	0	0	0	0	6	2
1821	0	0	0	0	0	0	0	0	4	5
1822	1	0	0	0	1	0	0	0	3	2
1823	0	0	0	0	0	0	0	0	3	2
1824	1	0	0	1	0	0	0	0	4	4
1825	0	0	0	1	0	0	0	0	3	4
1826	1	0	0	1	1	0	0	0	2	2
1827	0	0	0	0	1	0	0	0	3	3
1828	0	0	1	0	1	0	0	0	3	3
1829	0	0	0	0	1	0	0	0	1	1
1830	0	0	0	0	1	0	0	0	2	4
1831	0	0	1	0	0	0	0	0	3	4
1832	0	0	0	0	0	1	0	0	4	1
1833	0	0	0	0	0	0	0	0	0	3
1834	0	0	0	0	1	0	0	1	0	2
1835	0	0	1	0	0	0	0	0	2	2
1836	0	0	1	0	0	0	0	0	1	5
1837	0	0	0	1	1	0	0	0	1	0
1838	0	0	0	0	1	0	0	0	3	2
1839	0	0	0	0	1	0	0	0	2	3
1840	0	0	0	0	1	0	0	0	3	4
1841	0	0	1	0	0	0	0	0	2	4
1842	0	0	0	0	1	0	0	0	2	1
1843	0	0	0	0	1	0	0	0	0	3
1844	0	0	0	0	0	1	0	0	2	4
1845	0	0	0	0	1	0	0	0	1	2
1846	0	0	0	0	1	0	0	0	2	2
1847	0	0	1	0	1	0	0	0	2	3
1848	0	0	0	0	0	0	0	0	4	3
1849	0	0	1	0	1	0	0	0	2	4
1850	0	0	0	1	0	0	0	0	1	1
1851	0	0	1	1	0	0	0	0	3	2
1852	0	0	0	1	1	0	0	0	2	1
1853	0	0	0	0	1	0	0	0	3	1
1854	0	0	0	1	1	0	0	0	2	3
1855	0	0	0	0	0	0	0	0	2	2
1856	0	0	0	1	1	0	0	0	4	2
1857	0	0	0	0	1	0	0	0	3	3
1858	0	0	0	0	1	0	0	0	3	3
1859	0	0	0	0	1	0	0	0	5	4
1860	0	0	0	0	1	0	0	0	1	4
1861	0	0	0	0	1	0	0	0	2	3
1862	0	0	0	0	1	0	0	0	5	2
1863	0	0	0	0	1	0	0	0	3	4
1864	0	1	0	0	1	0	0	0	1	3
1865	0	1	0	0	2	0	0	0	3	2
1866	0	0	0	0	1	0	0	0	3	4
1867	0	1	0	1	0	0	0	0	2	5
1868	0	1	0	0	1	0	0	0	3	3
1869	0	0	0	0	1	0	0	0	1	3
1870	0	0	0	0	1	1	0	0	3	5
1871	0	0	0	0	1	0	0	0	2	3
1872	0	0	0	0	1	0	0	0	3	4
1873	0	0	0	0	0	0	0	0	2	2
1874	0	0	0	1	1	0	0	0	3	2
1875	0	0	1	1	0	0	0	0	2	3
1876	0	0	1	1	0	0	0	0	4	5
1877	0	0	0	1	1	0	0	0	2	3
1878	0	0	0	0	0	0	0	0	3	1
1879	0	0	0	1	1	0	0	0	3	1
1880	0	0	0	0	1	0	0	0	4	2
1881	0	0	0	0	2	1	0	0	2	3
1882	0	0	0	1	1	1	0	0	3	2
1883	0	0	0	0	1	0	0	0	2	0
1884	0	0	0	0	1	0	0	0	2	2
1885	0	0	0	0	1	0	0	0	3	1
1886	0	0	0	0	1	1	0	0	6	0
1887	0	0	0	0	0	1	0	0	4	2
1888	0	0	0	0	1	1	0	0	1	3
1889	0	0	0	0	0	1	0	0	2	3
1890	0	0	0	0	1	1	0	0	2	4
1891	0	0	0	0	0	1	0	0	3	1
1892	0	0	0	0	0	0	0	0	0	2
1893	0	1	0	0	0	1	0	0	3	1
1894	0	0	0	0	1	0	0	0	1	3
1895	0	0	0	0	0	0	0	0	1	1
1896	0	0	0	0	1	0	0	0	3	2
1897	0	0	0	0	1	0	0	0	3	3
1898	0	0	0	0	0	0	0	0	1	1
1899	0	0	0	0	1	0	0	0	2	2
1900	0	0	0	1	0	0	0	0	2	1
1901	0	0	0	1	0	0	0	0	1	4
1902	0	0	0	0	0	1	0	0	5	3
1903	0	0	0	1	0	1	0	0	3	2
1904	0	0	0	0	0	0	0	0	5	5
1905	0	0	0	1	0	1	0	0	2	3
1906	0	0	0	1	0	0	0	0	4	4
1907	0	0	0	0	0	0	0	0	4	3
1908	0	0	0	1	0	0	0	0	2	4
1909	0	0	0	0	0	0	0	0	3	3
1910	0	0	0	0	1	0	0	0	3	3
1911	0	0	0	0	0	0	0	0	2	3
1912	0	0	0	0	1	0	0	0	1	3
1913	0	0	0	0	1	0	0	0	3	3
1914	0	0	0	0	1	0	0	1	1	3
1915	0	0	0	1	0	0	0	1	2	3
1916	0	0	0	1	0	0	0	0	2	4
1917	0	0	0	0	0	0	1	0	3	2
1918	0	0	0	1	0	0	0	0	5	3
1919	0	0	0	1	1	0	0	0	3	4
1920	0	0	0	1	0	0	0	1	2	5
1921	0	0	0	1	1	0	0	0	2	1
1922	0	0	0	1	1	0	0	0	2	3
1923	0	0	0	1	1	0	0	0	5	2
1924	0	0	0	1	1	0	0	0	2	2
1925	0	0	0	0	1	1	0	0	2	2
1926	0	0	0	1	1	1	0	0	1	1
1927	0	0	0	1	1	0	0	0	3	2
1928	0	0	0	1	0	0	0	0	4	4
1929	0	0	0	0	1	0	0	1	3	3
1930	0	1	0	1	1	0	0	0	0	3
1931	0	0	0	0	1	0	0	0	1	3
1932	0	0	0	1	0	0	0	0	1	3
1933	0	0	0	1	1	0	0	0	1	3
1934	0	0	0	1	1	0	0	1	2	3
1935	0	0	0	1	0	0	0	0	1	3
1936	0	0	0	1	1	1	0	0	2	2
1937	0	0	0	1	0	0	0	0	2	3
1938	0	0	0	1	0	0	0	0	1	3
1939	0	0	0	1	0	1	0	0	3	1
1940	0	0	0	1	1	1	0	0	1	4
1941	0	0	0	1	1	1	0	0	1	2
1942	0	0	0	1	0	0	0	0	3	2
1943	1	1	0	0	2	0	0	0	1	6
1944	0	0	0	0	2	1	0	0	1	4
1945	0	0	0	0	1	1	0	0	5	3
1946	0	1	0	0	1	1	0	0	3	1
1947	0	0	0	1	0	1	0	0	3	3
1948	0	0	0	1	1	1	0	0	1	2
1949	0	0	0	1	1	1	0	0	2	2
1950	0	0	0	1	0	1	0	0	2	2
1951	0	0	0	1	0	0	0	0	3	4
1952	0	0	0	1	0	0	0	0	1	4
1953	0	0	0	1	1	0	0	0	1	2
1954	0	0	0	0	1	0	0	0	1	3
1955	0	0	0	1	0	0	0	0	3	1
1956	0	0	0	1	0	0	0	0	1	4
1957	0	0	0	0	1	0	0	0	2	1
1958	0	0	0	1	1	0	0	0	2	3
1959	0	0	0	1	1	0	0	0	3	3
1960	1	0	0	1	0	0	0	0	3	1
1961	0	0	0	1	0	0	0	0	2	2
1962	0	0	0	1	0	0	0	0	0	2
1963	1	0	0	1	1	0	0	0	3	2
1964	1	0	0	1	0	0	0	0	1	2
1965	1	0	0	0	0	0	0	0	1	3
1966	0	0	0	1	1	0	0	0	1	1
1967	0	0	0	1	0	0	0	0	1	4
1968	0	0	0	0	0	0	0	0	0	4
1969	0	0	0	1	1	0	0	0	2	2
1970	0	0	0	1	1	0	0	0	0	1
1971	0	0	0	1	1	0	0	0	2	4
1972	0	0	0	1	1	0	0	1	2	1
1973	0	0	0	1	0	0	0	0	2	2
1974	0	0	0	1	1	0	0	0	2	3
1975	0	0	0	0	0	0	0	0	1	4
1976	1	0	0	0	0	1	0	0	1	2
1977	0	0	0	0	0	0	0	0	0	2
1978	0	0	0	1	0	0	0	0	1	2
1979	0	0	0	1	0	1	0	0	3	4
1980	0	0	0	1	0	0	0	0	2	2
1981	0	0	0	0	0	1	0	0	1	1
1982	1	0	0	1	1	0	0	0	2	4
1983	0	0	0	1	0	0	0	0	1	2
1984	1	0	0	0	0	1	0	0	2	4
1985	1	0	0	1	1	0	0	0	3	1
1986	0	0	0	1	0	0	0	0	1	1
1987	1	0	0	0	1	0	0	0	0	3
1988	0	0	0	1	0	0	0	0	1	4
1989	0	0	0	1	1	0	0	0	5	2
1990	0	0	0	1	1	0	0	0	3	2
1991	0	0	0	0	1	0	0	0	2	1
1992	1	1	0	0	1	0	0	0	4	4
1993	0	0	0	1	0	0	0	0	3	1
1994	2	0	0	0	0	1	0	0	2	1
1995	1	0	0	1	0	0	0	0	1	4
1996	0	0	1	1	1	1	0	0	2	2
1997	2	1	0	1	0	0	0	0	2	1
1998	0	0	0	0	0	1	0	0	0	0
[truncated: 504 more rows]

## Sheet: H-bonds_set_B
Frames	Candesartan_Hbonds_ARG1	Candesartan_Hbonds_ARG2	Codeine_Hbonds_ARG1	Codeine_Hbonds_ARG2	Irbesartan_Hbonds_ARG1	Irbesartan_Hbonds_ARG2	Isavuconazole_Hbonds_ARG1	Isavuconazole_Hbonds_ARG2	Metformin_Hbonds_ARG1	Metformin_Hbonds_ARG2
0	1	1	1	2	1	0	0	0	3	2
1	1	0	0	1	0	1	0	0	1	2
2	2	0	0	1	0	0	0	0	4	3
3	1	1	1	2	0	0	0	0	3	3
4	2	0	0	1	0	1	0	0	2	3
5	0	1	0	0	1	0	0	0	2	3
6	0	0	0	1	1	0	0	0	3	3
7	0	2	0	1	1	0	0	0	2	1
8	0	1	0	2	0	0	0	0	2	2
9	0	2	0	2	0	0	0	0	2	3
10	0	1	0	2	1	0	0	0	1	1
11	0	1	1	2	0	0	0	0	1	3
12	0	2	1	1	0	0	0	0	4	4
13	0	0	2	2	0	0	0	0	2	3
14	0	1	0	0	0	0	0	0	3	2
15	0	0	1	1	0	0	0	0	2	3
16	0	1	0	0	0	0	0	0	2	2
17	0	2	0	0	0	0	0	1	1	2
18	0	2	0	1	0	1	0	0	3	0
19	1	1	0	1	0	1	0	0	2	4
20	0	2	1	0	0	0	0	0	3	2
21	1	1	1	1	0	0	0	0	3	2
22	1	2	0	1	0	0	1	0	1	2
23	2	2	0	1	0	0	0	1	2	1
24	1	2	1	1	0	0	0	0	3	3
25	1	0	1	1	0	0	0	0	2	3
26	0	1	0	0	0	1	0	0	0	3
27	1	1	1	1	0	0	0	0	2	2
28	0	0	0	1	0	0	0	0	3	3
29	2	0	1	2	0	0	0	0	2	3
30	0	0	1	1	0	0	0	0	3	3
31	2	1	2	1	0	0	0	0	0	2
32	1	0	0	3	0	1	0	0	0	1
33	1	0	0	2	0	0	0	0	2	2
34	1	1	0	1	0	0	0	0	3	3
35	0	1	1	1	0	0	1	0	1	2
36	2	0	1	1	0	1	0	0	2	3
37	1	0	1	2	0	0	0	0	2	2
38	1	1	1	2	1	0	0	0	4	1
39	1	0	1	1	1	0	0	0	3	2
40	0	0	0	0	0	0	0	0	3	1
41	1	0	0	1	2	0	0	0	0	4
42	1	0	1	1	1	0	0	0	3	0
43	2	0	0	2	0	0	0	0	1	3
44	0	0	0	1	1	0	0	1	1	3
45	1	0	2	2	1	0	0	0	3	1
46	1	0	1	2	1	0	0	0	2	1
47	0	0	1	0	0	0	0	0	2	1
48	0	1	0	0	0	0	0	0	2	0
49	0	0	1	1	1	0	0	0	3	0
50	0	0	1	1	0	0	0	0	1	2
51	0	0	1	2	0	0	0	0	3	2
52	0	1	1	1	0	0	0	0	2	1
53	0	1	0	1	1	0	0	0	1	2
54	0	1	1	1	1	0	0	0	4	1
55	0	0	1	2	0	0	0	0	2	1
56	0	1	0	1	1	0	1	0	2	3
57	1	0	1	1	0	0	0	0	4	0
58	1	1	1	1	0	0	0	0	2	0
59	1	0	0	1	1	0	0	0	1	1
60	1	1	0	2	1	0	1	0	1	0
61	2	0	0	0	0	0	0	0	2	0
62	0	0	1	1	1	0	0	0	3	3
63	0	0	2	1	0	0	0	0	2	3
64	1	0	0	1	0	0	0	0	2	3
65	2	0	0	0	0	0	0	0	0	2
66	0	1	1	1	0	0	0	0	3	1
67	0	1	1	2	1	0	0	0	2	1
68	1	0	1	2	0	0	0	0	2	1
69	2	0	0	1	1	0	0	0	1	3
70	1	0	1	1	1	0	1	0	1	1
71	2	1	0	1	0	0	0	0	1	3
72	0	0	1	1	0	0	0	0	2	2
73	2	1	0	2	1	0	0	0	2	1
74	1	1	0	1	1	0	1	0	2	1
75	2	1	0	2	0	0	0	0	2	3
76	2	0	0	3	0	0	0	0	1	1
77	2	0	1	0	1	0	0	0	2	1
78	1	1	1	1	0	0	0	0	3	2
79	1	0	0	1	1	0	0	0	2	1
80	3	0	1	2	1	0	0	0	2	3
81	0	2	0	2	0	0	0	0	2	3
82	1	0	1	1	1	0	0	0	2	2
83	2	0	1	1	0	0	0	0	3	0
84	1	0	1	2	0	0	0	0	2	2
85	1	1	0	1	0	1	0	0	3	1
86	2	0	1	2	1	0	0	0	1	3
87	1	1	1	0	1	0	0	0	2	3
88	1	0	1	1	1	0	0	0	2	3
89	1	0	0	0	1	0	0	0	1	3
90	2	1	0	0	0	0	0	0	1	3
91	1	0	0	0	1	0	0	0	2	4
92	0	0	0	0	0	0	0	0	1	2
93	0	0	0	0	0	0	0	0	0	1
94	0	0	0	1	0	0	0	0	1	3
95	1	1	1	1	0	0	0	0	1	1
96	1	1	0	1	0	0	0	0	1	1
97	1	1	2	2	0	0	0	0	3	2
98	1	0	2	1	1	0	0	0	2	0
99	0	0	1	1	0	0	0	0	2	1
100	1	0	1	2	0	0	0	0	3	2
101	1	1	2	0	0	0	0	0	1	2
102	0	1	1	1	0	0	0	0	3	0
103	0	1	0	0	0	0	0	0	0	2
104	0	1	1	1	0	0	0	0	1	1
105	0	1	0	1	0	0	0	0	3	1
106	0	0	0	1	1	0	0	0	2	3
107	0	0	1	2	0	0	0	0	1	1
108	0	1	1	1	0	0	1	0	2	2
109	0	0	0	0	0	0	0	0	1	2
110	0	0	0	3	0	0	0	0	1	0
111	0	1	0	1	0	0	0	0	1	1
112	0	1	0	0	1	0	0	0	2	2
113	0	0	0	1	1	0	0	0	2	1
114	0	0	1	0	1	0	0	0	3	1
115	0	1	1	1	0	0	0	0	2	1
116	0	0	0	2	0	0	0	0	2	1
117	0	1	1	2	0	0	0	0	1	1
118	0	1	1	1	0	0	0	0	2	1
119	0	0	0	1	0	0	0	0	2	1
120	0	1	0	0	0	0	0	0	1	1
121	0	2	1	0	0	0	0	0	3	3
122	0	0	0	1	0	0	0	0	3	1
123	0	0	1	1	0	0	0	0	2	3
124	0	1	1	1	0	0	0	0	3	3
125	0	0	1	1	0	1	0	0	1	1
126	0	0	1	1	1	0	0	0	1	3
127	0	0	1	2	0	0	0	0	2	3
128	0	0	0	1	0	0	0	0	1	3
129	0	0	3	0	0	0	0	0	2	2
130	0	0	1	2	0	0	0	0	2	2
131	0	0	0	1	0	0	0	0	0	3
132	0	0	2	2	0	0	0	0	3	2
133	0	0	0	2	0	0	0	0	2	2
134	0	0	1	1	0	0	0	0	3	2
135	0	1	1	1	1	1	0	0	2	2
136	0	0	0	1	1	1	0	0	3	1
137	0	0	2	2	0	0	0	0	1	0
138	0	0	1	0	0	0	0	0	2	2
139	0	0	1	2	0	0	0	0	1	3
140	0	0	1	2	1	0	0	0	3	3
141	0	0	2	0	0	0	0	0	0	0
142	0	0	1	2	0	0	0	0	1	3
143	0	0	0	0	0	0	0	0	1	2
144	1	1	0	1	0	0	0	0	3	0
145	0	0	0	1	0	0	0	0	1	2
146	0	0	0	1	1	0	0	0	2	2
147	0	0	0	2	0	0	0	0	1	2
148	0	0	0	1	1	0	0	0	1	4
149	0	0	1	0	0	0	0	0	2	1
150	0	0	0	2	1	0	0	0	1	2
151	0	0	0	2	0	0	0	0	0	2
152	0	0	2	0	2	0	0	0	3	4
153	0	0	1	1	1	0	0	0	3	2
154	0	0	1	0	0	0	0	0	2	0
155	0	0	0	0	1	0	0	0	2	2
156	0	0	0	2	2	0	1	0	1	1
157	0	0	0	2	0	0	0	0	1	1
158	0	0	0	1	1	0	0	0	2	0
159	0	0	1	1	0	0	0	0	3	1
160	0	0	1	1	0	0	0	0	1	2
161	0	0	1	0	1	0	0	0	1	3
162	0	0	0	1	1	0	0	0	3	0
163	0	0	1	1	0	0	0	0	2	0
164	0	0	0	0	1	0	0	0	2	0
165	0	0	1	1	1	0	0	0	2	1
166	0	0	1	1	0	0	0	0	2	1
167	0	0	0	1	1	0	0	0	2	2
168	0	0	1	1	2	0	1	0	3	3
169	0	0	1	1	0	1	0	0	2	3
170	0	0	1	1	1	0	0	0	0	3
171	0	1	1	1	0	0	0	0	0	4
172	0	0	2	1	2	0	0	0	3	1
173	0	0	0	1	1	0	0	0	2	2
174	0	1	1	1	2	0	0	0	3	3
175	0	1	0	1	1	0	0	0	1	2
176	0	0	1	1	0	0	0	1	3	1
177	0	0	1	3	1	0	0	0	3	1
178	0	0	0	1	2	1	0	0	1	3
179	0	0	1	1	0	0	0	1	2	1
180	0	1	0	3	2	0	0	0	2	2
181	0	1	0	2	2	0	0	0	1	1
182	0	0	0	1	1	0	0	0	1	1
183	0	0	1	1	1	0	0	0	2	0
184	0	0	0	1	1	0	0	0	1	0
185	0	0	0	3	0	0	0	0	3	2
186	0	0	0	1	1	0	0	0	1	2
187	0	0	0	0	0	0	0	0	2	3
188	0	0	0	0	1	0	0	0	2	1
189	0	0	0	2	1	0	0	0	2	4
190	0	0	0	0	1	0	0	0	2	4
191	0	0	0	1	1	0	0	0	1	3
192	0	0	1	1	1	0	0	0	2	4
193	0	0	0	0	0	0	0	0	2	4
194	0	0	0	1	0	0	0	0	0	3
195	0	0	0	1	0	0	0	0	2	5
196	0	0	0	1	1	0	0	0	2	2
197	0	0	0	0	0	0	0	0	2	4
198	0	0	0	1	1	0	0	0	2	3
199	0	0	0	1	1	0	0	0	3	4
200	0	0	0	2	1	0	0	0	0	5
201	1	0	0	2	2	0	0	0	2	3
202	1	1	0	1	1	0	0	0	0	3
203	1	0	0	1	0	0	0	0	0	2
204	0	0	0	0	1	0	0	0	2	4
205	0	0	0	1	1	0	0	0	1	3
206	1	0	0	1	0	0	0	0	0	1
207	1	0	0	1	1	0	0	0	0	3
208	1	1	0	1	0	0	0	0	1	4
209	0	0	0	1	0	0	0	0	2	3
210	0	1	0	1	0	0	0	0	3	3
211	0	0	0	0	0	0	0	0	2	3
212	0	0	0	1	0	0	0	0	1	0
213	0	0	0	1	0	0	0	0	1	4
214	0	0	0	0	0	0	0	0	1	2
215	0	0	0	0	0	0	0	0	1	5
216	0	0	0	1	1	1	0	0	2	2
217	0	1	0	0	0	0	0	0	1	3
218	0	0	0	1	2	0	0	0	2	3
219	0	0	0	2	0	0	0	0	1	3
220	0	0	0	2	1	0	0	0	3	4
221	0	0	0	1	0	0	0	0	3	2
222	1	1	0	1	0	0	0	0	2	3
223	1	0	0	0	0	0	0	0	2	2
224	1	0	0	0	0	0	0	0	1	2
225	0	0	0	1	1	0	0	0	1	4
226	1	0	0	0	0	0	0	0	3	5
227	0	0	0	0	1	0	0	0	1	3
228	1	0	0	2	2	0	0	0	2	4
229	1	0	0	1	1	0	0	0	2	1
230	1	0	0	1	1	1	0	0	2	1
231	1	0	0	2	0	0	0	0	1	3
232	1	0	0	1	0	1	0	0	3	2
233	0	0	0	0	0	0	0	0	2	4
234	1	0	0	0	0	1	0	0	3	4
235	1	0	0	0	0	0	0	0	2	4
236	0	0	0	2	0	1	0	0	1	4
237	0	0	0	1	0	1	0	0	2	2
238	0	0	0	0	0	1	0	0	1	3
239	0	0	0	2	0	0	0	0	3	2
240	1	0	0	1	0	0	0	0	4	3
241	1	0	0	2	0	0	0	0	2	4
242	1	0	0	1	0	0	0	0	1	3
243	1	0	0	1	0	0	0	0	3	4
244	1	0	0	1	0	0	0	0	2	1
245	0	0	0	1	0	0	0	0	2	2
246	1	0	0	0	0	0	0	0	2	2
247	1	0	0	0	1	0	0	0	2	4
248	0	0	0	0	0	0	0	0	2	4
249	0	0	0	0	0	0	0	0	1	2
250	0	0	0	1	0	1	0	0	3	5
251	1	0	0	3	0	0	0	0	3	3
252	0	0	0	2	0	0	1	0	2	3
253	0	1	0	2	0	0	0	0	2	2
254	0	0	0	2	0	0	0	0	1	3
255	0	0	0	0	0	0	0	0	2	3
256	0	0	0	1	1	0	0	0	2	2
257	0	0	0	0	0	1	0	0	1	2
258	0	0	0	1	0	1	0	0	1	2
259	0	0	0	0	0	0	0	0	1	3
260	0	0	0	0	1	0	0	0	1	2
261	0	0	0	1	1	0	0	0	3	3
262	0	0	0	1	0	1	0	0	2	5
263	0	0	0	1	0	0	0	0	1	4
264	0	0	0	0	0	0	0	0	1	5
265	0	0	0	1	0	0	0	0	3	3
266	0	0	0	1	1	0	0	0	4	2
267	0	0	0	1	0	0	0	0	2	2
268	0	0	0	1	0	1	0	0	2	1
269	0	0	0	2	0	0	0	0	2	2
270	0	0	0	1	1	0	0	0	3	4
271	0	0	0	0	0	1	0	0	1	1
272	0	0	0	1	0	0	0	0	1	1
273	0	0	0	1	1	0	0	0	2	2
274	0	0	0	2	1	0	0	0	2	1
275	0	0	0	2	1	1	0	0	2	5
276	0	0	0	1	2	0	0	0	3	4
277	0	0	0	2	0	1	0	0	3	1
278	0	0	0	1	0	0	0	0	2	3
279	0	0	0	0	1	0	0	0	2	4
280	0	0	0	2	0	0	0	0	3	3
281	0	0	0	2	0	0	0	0	1	4
282	0	0	0	2	0	0	0	0	2	3
283	0	0	0	1	1	0	0	0	0	0
284	0	0	0	0	0	0	0	0	2	1
285	0	0	0	0	0	0	0	0	1	4
286	0	0	0	2	0	0	0	0	2	3
287	0	0	0	2	1	0	0	0	2	2
288	0	0	0	0	0	0	0	0	1	2
289	0	0	0	2	0	0	0	0	2	2
290	0	0	0	1	0	0	0	0	4	4
291	0	0	0	1	1	0	0	0	1	2
292	0	0	0	2	0	0	0	0	1	1
293	0	0	0	1	0	0	0	0	0	4
294	0	0	0	0	0	0	0	0	2	4
295	0	0	0	2	0	1	0	0	1	3
296	0	0	0	1	1	0	0	0	1	5
297	0	0	0	1	0	0	0	0	1	4
298	0	0	0	1	0	0	0	0	2	2
299	0	0	0	1	0	0	0	0	0	2
300	0	0	0	2	1	0	0	0	3	3
301	0	0	0	1	2	0	0	0	2	2
302	0	0	0	2	1	1	0	0	1	1
303	0	0	0	0	1	0	0	0	2	3
304	0	0	0	1	2	0	0	0	3	1
305	0	0	0	0	0	0	0	0	3	2
306	0	0	0	1	0	0	0	0	2	2
307	0	0	0	1	0	1	0	0	1	3
308	0	0	0	0	1	1	0	0	2	3
309	0	0	0	1	1	0	0	0	2	2
310	0	0	0	0	0	0	0	0	3	2
311	0	0	0	1	0	0	0	0	2	2
312	0	0	0	1	0	0	0	0	0	3
313	0	0	0	0	0	1	0	0	2	4
314	0	0	0	3	0	0	0	0	0	4
315	0	0	0	2	1	0	0	0	3	0
316	0	0	0	1	2	0	0	0	4	3
317	0	0	0	0	1	0	0	0	1	1
318	0	0	0	0	0	0	0	0	2	3
319	0	0	0	0	1	0	0	0	2	1
320	0	0	0	2	1	0	0	0	1	1
321	0	0	0	0	0	0	0	0	2	1
322	0	0	0	2	2	0	0	0	3	3
323	0	0	0	0	0	0	0	0	1	1
324	0	0	0	2	0	0	0	0	2	1
325	0	0	0	0	1	0	0	0	4	2
326	0	0	0	2	1	0	0	0	2	0
327	0	0	0	0	1	0	0	0	2	2
328	0	0	0	1	0	0	0	0	4	2
329	0	0	0	3	1	0	0	0	1	2
330	0	0	0	2	0	0	0	0	1	2
331	0	0	0	0	0	0	0	0	2	4
332	0	0	0	2	2	0	0	0	2	2
333	0	0	0	1	0	0	0	0	1	3
334	0	0	0	2	0	0	0	0	2	1
335	0	0	0	2	1	1	0	0	1	2
336	0	0	0	1	1	0	0	0	3	1
337	0	0	0	2	0	0	0	0	2	2
338	0	0	0	0	0	0	0	0	3	1
339	0	0	0	0	2	0	0	0	1	2
340	0	0	0	1	0	0	0	0	1	3
341	0	0	0	1	0	0	0	0	3	2
342	0	0	0	2	0	0	0	0	2	2
343	0	0	0	0	0	0	0	0	3	2
344	0	0	0	1	0	0	0	0	1	2
345	0	0	0	1	0	1	0	0	2	3
346	0	0	0	1	0	1	0	0	3	1
347	0	0	0	0	0	0	0	0	3	2
348	0	0	0	2	0	0	0	0	1	4
349	0	0	0	1	0	0	1	0	3	1
350	0	0	0	2	0	0	1	0	3	3
351	0	0	0	0	1	0	0	0	2	3
352	0	0	0	2	0	1	0	0	1	3
353	0	0	0	0	1	0	0	0	2	2
354	0	0	0	1	0	0	0	0	2	3
355	0	0	0	1	1	0	0	0	1	4
356	0	0	0	2	0	0	0	0	3	3
357	0	0	0	1	1	1	0	0	1	4
358	0	0	0	1	0	0	0	0	3	2
359	0	0	0	1	1	0	0	0	2	3
360	0	0	0	1	2	0	0	0	1	2
361	0	0	0	0	1	0	0	0	2	1
362	0	0	0	0	1	0	0	0	2	3
363	0	0	0	0	1	0	0	0	1	4
364	0	0	0	0	0	0	0	0	2	2
365	0	0	0	2	1	0	0	0	3	3
366	0	0	0	0	0	0	0	0	0	1
367	0	0	0	0	0	0	0	0	3	2
368	0	0	0	1	0	0	0	0	1	3
369	0	0	0	0	1	1	0	0	2	2
370	0	0	0	0	0	0	0	0	2	3
371	0	0	0	0	1	0	0	0	3	2
372	1	0	0	0	1	1	0	0	0	3
373	0	0	0	0	0	0	0	0	3	3
374	1	0	0	0	0	0	0	0	3	1
375	0	0	0	0	1	1	0	0	2	2
376	1	0	0	0	0	1	0	0	2	2
377	1	0	0	0	1	0	0	0	3	4
378	1	0	0	1	0	0	0	0	3	3
379	0	0	0	2	0	0	1	0	3	1
380	0	0	0	2	0	0	1	0	2	3
381	0	0	0	1	0	0	1	0	1	2
382	0	0	0	2	1	0	0	0	2	2
383	0	0	0	1	0	0	0	0	3	3
384	0	0	0	1	0	0	0	0	3	3
385	0	0	0	2	0	0	0	0	2	1
386	0	0	0	1	1	0	0	0	1	4
387	0	0	0	1	0	0	1	0	0	3
388	0	0	0	2	0	0	0	0	2	3
389	0	0	0	0	0	0	0	0	2	2
390	1	0	0	1	0	0	0	0	2	1
391	0	0	0	1	0	0	0	0	2	1
392	0	0	0	1	1	0	0	0	1	1
393	1	0	0	1	0	0	0	0	1	3
394	0	0	0	1	0	0	0	0	4	2
395	0	0	0	0	0	0	0	0	2	1
396	1	0	0	2	1	0	0	0	3	2
397	0	0	0	2	0	0	1	0	3	2
398	0	0	0	1	0	0	0	0	3	2
399	0	0	0	0	0	0	0	0	1	2
400	0	0	0	0	0	0	0	0	2	2
401	0	0	0	1	0	0	0	0	1	2
402	0	0	0	2	1	0	0	0	2	1
403	0	0	0	1	0	0	0	0	2	2
404	0	0	0	2	0	0	0	0	1	2
405	0	1	0	2	0	0	0	0	2	3
406	0	0	0	0	0	0	0	0	2	2
407	1	0	0	2	0	0	0	0	2	3
408	0	0	0	2	0	0	0	0	0	3
409	0	1	0	0	0	0	0	0	2	3
410	1	0	0	2	0	0	0	0	1	1
411	0	0	0	1	0	0	0	0	1	2
412	1	0	0	1	0	0	0	0	3	3
413	1	0	0	1	0	0	1	0	2	1
414	1	1	0	1	0	0	1	0	3	3
415	0	1	0	0	0	0	0	0	2	0
416	0	1	0	2	0	0	0	0	2	3
417	0	1	0	2	0	0	0	0	3	2
418	0	0	0	0	0	0	0	0	3	1
419	1	1	0	2	0	0	0	0	2	3
420	1	1	0	2	0	0	0	0	2	2
421	0	0	0	1	0	1	0	0	2	3
422	1	1	0	1	0	0	0	0	1	2
423	1	0	0	1	0	0	0	0	2	1
424	1	0	0	1	0	0	0	0	2	1
425	1	0	0	2	0	0	0	0	0	2
426	1	0	0	2	0	0	0	0	2	3
427	1	0	0	0	0	0	0	0	2	4
428	0	0	0	1	0	0	1	0	1	3
429	1	0	0	1	0	0	1	0	0	2
430	0	1	0	1	0	0	1	0	1	2
431	1	0	0	1	1	0	0	0	1	4
432	1	1	0	2	0	0	0	0	2	3
433	1	1	0	1	0	0	0	0	3	2
434	0	1	0	2	0	0	0	0	2	4
435	0	1	0	0	0	0	0	0	1	2
436	1	1	0	1	1	0	0	0	2	3
437	1	1	0	1	0	0	0	0	4	2
438	0	1	0	1	0	0	0	0	3	2
439	1	1	0	1	0	0	0	0	2	2
440	0	1	0	0	1	0	1	0	1	3
441	0	1	0	0	1	0	0	0	2	3
442	0	1	0	1	0	0	0	0	2	1
443	1	0	0	0	0	0	1	0	2	2
444	0	1	0	0	0	0	0	0	2	1
445	1	1	0	1	0	0	0	0	2	2
446	1	1	0	2	0	0	0	0	2	3
447	1	1	0	0	0	0	0	0	2	2
448	1	1	0	1	0	0	0	0	2	2
449	0	1	0	2	0	0	0	0	0	1
450	0	0	0	1	0	0	0	1	1	2
451	0	1	0	1	2	0	0	0	2	2
452	1	1	0	1	1	0	1	0	3	3
453	1	1	0	0	1	0	0	0	1	4
454	0	0	0	0	1	0	0	0	2	1
455	0	0	0	0	0	0	0	0	1	2
456	0	0	0	1	1	0	0	0	0	2
457	1	0	0	0	1	0	0	0	2	2
458	1	0	0	0	1	0	0	0	2	2
459	0	0	0	1	1	0	0	0	2	2
460	0	0	0	0	0	0	0	0	1	2
461	1	1	0	0	0	0	0	0	4	0
462	0	1	0	1	1	0	0	0	1	2
463	1	1	0	1	1	0	0	0	2	2
464	0	0	0	0	0	0	0	0	3	3
465	0	1	0	1	2	0	0	0	1	2
466	0	1	0	0	1	0	0	0	0	1
467	0	0	0	0	1	0	0	0	2	2
468	1	1	0	2	0	0	0	0	1	1
469	0	1	0	0	2	0	0	0	2	1
470	0	0	0	0	0	0	0	0	1	2
471	0	0	0	0	1	0	0	0	1	2
472	0	0	0	2	0	0	0	0	1	3
473	0	0	0	0	0	0	0	0	2	3
474	0	0	0	0	0	0	0	0	2	2
475	0	1	0	0	0	1	0	0	2	2
476	0	1	0	1	0	0	0	0	4	3
477	0	0	0	0	0	0	0	0	3	2
478	0	0	0	1	0	0	0	0	3	3
479	0	1	0	0	0	0	0	0	1	2
480	0	0	0	0	0	0	0	0	1	2
481	0	0	0	0	0	0	0	0	3	2
482	0	1	0	1	0	0	0	0	1	2
483	0	0	0	2	0	0	0	0	1	3
484	1	1	0	1	0	0	0	0	1	3
485	0	0	0	1	0	0	0	0	1	3
486	0	1	0	0	0	0	0	0	2	2
487	1	0	0	0	0	0	0	0	2	1
488	1	1	0	0	0	0	0	0	2	3
489	1	1	0	1	0	0	0	1	1	1
490	0	0	0	0	0	0	0	0	1	2
491	1	1	0	0	0	0	0	0	1	3
492	0	1	0	1	0	0	0	0	2	0
493	1	0	0	0	0	0	0	0	2	2
494	1	0	0	2	0	0	0	0	3	1
495	1	0	0	1	0	0	0	0	3	1
496	1	1	0	0	0	0	0	0	2	3
497	1	0	0	2	0	0	0	1	1	2
498	1	0	0	1	0	0	0	0	1	3
499	1	0	0	1	0	0	0	0	2	3
500	1	0	0	0	0	0	0	0	3	2
501	1	1	0	1	0	0	0	0	3	0
502	0	1	0	0	0	0	0	0	1	2
503	0	1	0	1	0	0	0	0	2	4
504	0	0	0	1	0	0	0	0	2	2
505	0	1	0	1	0	0	0	0	2	3
506	1	1	0	0	0	0	0	0	1	3
507	1	1	0	1	0	0	0	0	2	1
508	1	1	0	1	0	0	0	0	2	3
509	0	1	0	1	0	0	0	0	3	3
510	0	0	0	1	0	0	0	0	1	1
511	0	1	0	1	0	0	0	0	2	3
512	0	1	0	0	0	0	0	1	3	3
513	0	1	0	0	0	0	0	0	2	2
514	1	0	0	1	0	0	0	0	2	3
515	0	1	0	0	0	0	0	0	2	4
516	0	0	0	1	0	0	0	0	2	2
517	0	0	0	1	0	0	0	0	3	2
518	1	0	0	0	0	0	0	0	2	2
519	0	1	0	0	0	0	0	0	2	3
520	0	1	0	1	0	0	0	0	2	2
521	1	1	0	0	0	1	0	0	3	3
522	1	1	0	1	0	0	0	0	2	1
523	0	1	0	0	0	0	0	0	2	3
524	1	0	0	1	0	0	0	0	2	1
525	1	0	0	0	0	0	0	0	1	3
526	0	0	0	1	0	0	0	0	3	2
527	1	1	0	0	0	0	0	0	2	4
528	0	0	0	1	0	0	0	0	2	2
529	0	0	0	0	0	1	0	0	2	2
530	1	1	0	0	0	0	0	0	3	4
531	0	0	0	0	0	0	0	0	2	1
532	0	1	0	1	0	0	0	0	2	2
533	1	1	0	1	0	0	0	0	2	2
534	0	0	0	0	0	0	0	0	2	2
535	1	0	0	1	0	0	0	0	1	2
536	1	0	0	1	0	0	0	0	4	0
537	0	1	0	0	0	0	0	0	2	3
538	0	1	0	1	0	0	0	0	1	3
539	1	1	0	1	0	0	0	0	1	2
540	0	0	0	0	0	0	0	0	0	1
541	0	1	0	1	0	0	0	0	3	1
542	1	0	0	1	0	0	0	0	2	2
543	1	0	0	0	0	0	0	0	2	3
544	0	1	0	0	0	0	0	0	2	3
545	1	1	0	0	0	0	0	0	1	2
546	0	1	0	0	0	0	0	1	2	3
547	0	0	0	0	0	0	0	0	2	3
548	0	1	0	0	0	0	0	0	2	2
549	0	1	0	1	0	0	0	0	1	3
550	0	1	0	0	0	0	0	0	1	2
551	0	0	0	0	0	0	0	0	2	1
552	1	0	0	0	0	0	0	0	2	2
553	0	0	0	0	0	0	0	0	1	2
554	0	0	0	0	0	0	0	0	1	3
555	0	1	0	0	0	0	0	1	3	3
556	0	0	0	0	0	0	0	0	1	2
557	0	0	0	0	0	0	0	0	2	1
558	0	0	0	0	0	0	0	0	2	2
559	0	0	0	0	0	0	0	1	3	3
560	0	0	0	0	0	0	0	0	3	2
561	0	0	0	0	0	0	0	0	2	4
562	0	0	0	0	0	0	0	0	1	2
563	0	0	0	0	0	0	0	0	2	4
564	1	0	0	0	0	0	0	0	1	2
565	0	1	0	0	0	0	0	0	4	2
566	0	0	0	0	0	0	0	1	2	2
567	0	0	0	0	0	0	0	0	1	1
568	0	0	0	0	0	0	0	0	1	3
569	0	0	0	0	0	0	0	0	3	2
570	0	1	0	1	0	0	0	0	3	1
571	0	1	0	1	0	0	0	0	3	2
572	0	0	0	0	0	0	0	0	1	1
573	0	0	0	0	0	0	0	0	0	2
574	0	0	0	0	0	0	0	0	1	3
575	0	1	0	1	0	0	0	0	1	2
576	1	0	0	0	0	0	0	0	1	1
577	0	0	0	1	0	0	0	0	2	2
578	0	1	0	1	0	0	0	0	2	3
579	0	1	0	0	0	0	0	1	1	2
580	0	1	0	0	0	0	0	1	0	1
581	0	2	0	0	0	0	0	0	2	1
582	0	0	0	0	0	0	0	0	1	1
583	0	1	0	0	0	0	0	0	2	3
584	0	1	0	0	0	0	0	0	2	2
585	0	0	0	0	0	0	0	0	1	3
586	0	1	0	0	0	0	0	0	2	3
587	0	1	0	0	0	0	0	0	3	2
588	0	1	0	1	0	0	0	0	2	3
589	0	0	0	0	0	0	0	0	3	3
590	0	0	0	1	0	0	0	1	2	1
591	0	0	0	0	0	0	0	0	3	1
592	0	1	0	0	0	0	0	0	1	1
593	0	2	0	0	0	0	0	0	1	4
594	0	0	0	0	0	0	0	0	3	3
595	0	0	0	0	0	0	0	0	2	2
596	0	1	0	0	0	0	0	0	2	3
597	0	0	0	0	0	0	0	0	2	0
598	0	0	0	0	0	0	0	0	3	3
599	0	1	0	0	0	0	0	0	2	1
600	0	2	0	0	0	0	0	0	3	3
601	0	1	0	0	0	0	0	0	2	3
602	0	1	0	0	0	0	0	0	2	2
603	0	1	0	0	0	0	0	0	1	2
604	0	1	0	0	0	0	0	0	1	3
605	0	1	0	0	0	0	0	0	2	2
606	0	1	0	0	0	0	0	0	2	2
607	0	1	0	0	0	0	1	0	2	3
608	0	0	0	1	0	0	0	0	2	1
609	0	0	0	0	0	0	0	1	2	3
610	0	0	0	0	0	0	0	0	1	1
611	0	0	0	0	0	0	0	0	2	1
612	0	0	0	0	0	0	0	0	1	1
613	0	0	0	0	0	0	0	0	1	2
614	0	0	0	0	0	0	0	0	0	2
615	0	0	0	0	0	0	0	0	2	2
616	0	0	0	0	0	0	0	0	2	2
617	0	0	0	1	0	0	0	0	2	3
618	0	0	0	0	0	0	0	0	3	2
619	0	0	0	0	0	0	0	0	2	2
620	0	0	0	0	0	0	0	0	2	3
621	0	0	0	0	0	0	0	0	2	2
622	0	0	0	0	0	0	0	0	2	1
623	0	0	0	0	0	0	0	0	3	4
624	0	0	0	0	0	0	0	0	1	1
625	0	0	0	0	0	0	0	0	4	3
626	0	0	0	0	0	0	0	0	2	4
627	0	0	0	0	0	0	1	0	0	4
628	0	0	0	0	0	0	1	0	2	3
629	0	0	0	0	0	0	0	0	2	2
630	0	0	0	1	0	0	0	0	2	3
631	0	0	0	0	0	0	0	0	1	3
632	0	0	0	0	0	0	0	0	2	3
633	0	0	0	0	0	0	0	0	2	0
634	0	0	0	0	0	0	0	0	1	1
635	0	0	0	0	0	0	0	0	1	3
636	0	0	0	0	0	0	0	0	2	2
637	0	0	0	0	0	0	0	0	2	1
638	0	0	0	0	0	0	1	0	2	1
639	0	0	0	0	0	0	1	0	1	4
640	0	0	0	0	0	0	0	0	2	2
641	0	0	0	0	0	0	0	0	2	1
642	0	0	0	0	0	0	0	0	1	1
643	0	0	0	0	0	0	0	0	2	3
644	0	0	0	0	0	0	0	0	3	2
645	0	1	0	0	0	0	0	0	2	3
646	0	0	0	0	0	0	0	0	3	3
647	0	0	0	0	0	0	0	0	1	4
648	0	1	0	0	0	0	0	0	1	2
649	0	0	0	0	0	0	0	0	1	3
650	0	0	0	0	0	0	0	0	2	3
651	0	0	0	0	0	0	0	0	2	2
652	1	0	0	0	0	0	0	0	2	1
653	0	0	0	0	0	0	0	0	1	3
654	0	0	0	0	0	0	0	0	3	2
655	0	1	0	0	0	0	0	0	3	4
656	0	0	0	0	0	0	0	0	4	2
657	1	0	0	0	0	0	0	0	2	2
658	0	0	0	0	0	0	0	0	2	3
659	0	0	0	0	0	0	0	0	1	3
660	0	0	0	0	0	0	1	0	2	1
661	0	0	0	0	0	0	0	0	3	3
662	0	0	0	0	0	0	0	0	3	2
663	0	0	0	0	0	0	0	0	3	2
664	0	0	0	0	0	0	1	0	2	2
665	0	0	0	0	0	0	1	0	2	4
666	0	0	0	0	0	0	0	0	1	3
667	0	0	0	0	0	0	1	0	4	3
668	0	0	0	0	0	0	0	0	3	3
669	0	0	0	0	0	0	0	0	3	2
670	0	0	0	0	0	0	0	0	2	4
671	0	0	0	0	0	0	0	1	2	3
672	0	0	0	0	0	0	0	0	3	2
673	0	0	0	0	0	0	0	0	4	3
674	0	0	0	0	0	0	0	0	2	3
675	0	0	0	0	0	0	0	0	1	2
676	0	0	0	0	0	0	0	0	1	1
677	0	0	0	0	0	0	0	0	2	2
678	0	0	0	0	0	0	0	0	4	4
679	0	0	0	0	0	0	0	1	4	2
680	0	0	0	0	0	0	0	0	3	2
681	0	0	0	0	0	0	0	0	1	2
682	0	0	0	0	0	0	0	0	2	1
683	0	0	0	0	0	0	0	0	2	3
684	0	0	0	0	0	0	0	0	2	3
685	0	0	0	0	0	0	0	0	1	3
686	0	0	0	0	0	0	0	0	3	2
687	0	0	0	0	0	0	0	0	4	3
688	0	0	0	0	0	0	0	0	2	4
689	0	0	0	0	0	0	0	0	2	2
690	0	0	0	0	0	0	1	0	2	2
691	0	0	0	0	0	0	0	0	2	3
692	0	0	0	0	0	0	0	0	3	2
693	0	0	0	0	0	0	0	0	3	2
694	0	0	0	0	0	0	1	0	2	2
695	0	0	0	0	0	0	0	0	1	3
696	0	0	0	0	0	0	0	1	2	2
697	0	0	0	0	0	0	1	0	1	3
698	0	0	0	0	0	0	0	0	3	3
699	0	0	0	0	0	0	0	0	4	4
700	0	0	0	0	0	0	0	0	2	2
701	0	0	0	0	0	0	0	0	3	3
702	0	0	0	0	0	0	0	0	3	3
703	0	0	0	0	0	0	0	0	4	3
704	0	0	0	0	0	0	0	0	1	2
705	0	0	0	0	1	0	0	0	4	2
706	1	0	0	0	0	0	0	0	2	2
707	0	0	0	0	0	0	0	0	2	3
708	0	1	0	0	1	0	0	0	0	2
709	0	0	0	0	0	0	0	0	2	3
710	0	0	0	0	0	0	0	0	2	2
711	0	1	0	0	0	0	1	0	2	3
712	0	0	0	0	0	0	0	0	2	4
713	0	0	0	0	0	0	0	0	2	2
714	0	0	0	0	0	0	0	0	1	2
715	0	0	0	0	0	0	0	0	2	3
716	0	0	0	0	0	0	0	0	1	2
717	0	0	0	0	0	0	1	0	2	2
718	0	0	0	0	1	0	0	0	1	2
719	0	0	0	0	0	0	0	0	2	4
720	0	0	0	0	0	0	1	0	2	2
721	0	0	0	0	0	0	0	0	1	4
722	0	0	0	0	0	0	1	0	3	1
723	0	0	0	0	0	0	0	0	2	3
724	0	0	0	0	0	0	0	0	3	3
725	0	0	0	0	0	0	0	0	2	1
726	0	0	0	0	0	0	0	0	2	3
727	0	0	0	0	0	0	0	0	1	2
728	0	0	0	0	0	0	1	0	1	1
729	0	0	0	0	0	0	0	0	1	2
730	0	0	0	0	0	0	0	0	1	3
731	0	0	0	0	0	0	0	0	2	1
732	0	0	0	0	0	0	0	0	1	1
733	0	0	0	0	0	0	0	0	2	3
734	0	0	0	0	0	0	0	0	1	3
735	0	0	0	0	0	0	0	0	1	3
736	0	0	0	0	0	0	0	0	2	3
737	0	0	0	0	0	0	0	0	3	2
738	0	0	0	0	0	0	0	0	1	4
739	0	0	0	0	0	0	0	1	2	2
740	0	0	0	0	0	0	2	0	2	1
741	0	0	0	0	0	0	0	1	4	1
742	0	0	0	0	0	0	0	0	3	3
743	0	0	0	0	0	0	0	0	2	2
744	0	0	0	0	0	0	1	0	1	1
745	0	0	0	0	0	0	0	0	1	1
746	0	0	0	0	1	0	0	0	2	2
747	0	0	0	0	0	0	1	1	2	3
748	0	0	0	0	0	0	0	0	1	3
749	0	0	0	0	0	0	0	1	3	2
750	0	0	0	0	0	0	1	0	3	1
751	0	0	0	0	0	0	0	0	2	1
752	0	0	0	0	0	0	1	0	2	2
753	0	0	0	0	0	0	1	0	2	1
754	0	0	0	0	0	0	1	0	1	2
755	0	0	0	0	0	0	0	0	2	4
756	0	0	0	0	0	0	0	0	2	4
757	0	0	0	0	0	0	1	0	3	2
758	0	0	0	0	0	0	0	0	3	2
759	0	0	0	0	0	0	0	0	2	3
760	0	0	0	0	0	0	0	0	1	1
761	0	0	0	0	0	0	1	0	1	3
762	0	0	0	0	0	0	0	0	1	3
763	0	0	0	0	0	0	1	0	1	2
764	0	0	0	0	0	0	0	1	1	2
765	0	0	0	0	0	0	0	1	4	2
766	0	0	0	0	0	0	0	0	0	4
767	0	0	0	0	0	0	0	0	3	3
768	0	0	0	0	0	0	1	0	1	4
769	0	0	0	0	0	0	0	0	4	3
770	0	0	0	0	0	0	0	0	3	3
771	0	0	0	0	0	0	1	1	2	1
772	0	0	0	0	0	0	0	0	3	2
773	0	0	0	0	0	0	0	0	3	2
774	0	0	0	0	0	0	0	0	2	3
775	0	0	0	0	0	0	1	1	2	2
776	0	0	0	0	0	0	1	0	3	1
777	0	0	0	0	0	0	0	0	0	1
778	0	0	0	0	0	0	0	0	1	3
779	0	0	0	0	0	0	0	0	1	2
780	0	0	0	0	0	0	1	1	0	2
781	0	0	0	0	0	0	1	0	1	1
782	0	0	0	0	0	0	0	0	2	2
783	0	0	0	0	0	0	0	0	4	3
784	0	0	0	0	0	0	0	0	2	2
785	0	0	0	0	0	0	0	0	2	1
786	0	0	0	0	0	0	0	0	2	3
787	0	0	0	0	0	0	0	0	1	2
788	1	0	0	0	0	0	0	0	3	2
789	0	0	0	0	0	0	1	0	1	2
790	0	0	0	0	0	0	0	0	0	3
791	0	0	0	0	0	0	0	1	2	2
792	0	0	0	0	0	0	0	0	3	1
793	0	0	0	0	0	0	0	0	0	3
794	0	0	0	0	0	0	0	0	0	3
795	0	0	0	0	0	0	0	0	2	4
796	0	0	0	0	0	0	0	0	2	2
797	0	0	0	0	0	0	0	0	3	1
798	0	0	0	0	0	0	0	0	1	1
799	0	0	0	0	0	0	0	1	1	1
800	0	0	0	0	0	0	0	0	2	2
801	0	0	0	0	0	0	0	0	2	1
802	0	0	0	0	0	0	0	1	2	3
803	0	0	0	0	0	0	0	1	3	3
804	0	0	0	0	0	0	0	0	2	3
805	0	0	0	0	0	0	0	0	2	2
806	0	0	0	0	0	0	0	0	3	3
807	0	0	0	0	0	0	2	0	2	2
808	0	0	0	0	0	0	0	0	1	2
809	0	0	0	0	0	0	0	0	3	1
810	0	0	0	0	0	0	0	0	3	2
811	1	0	0	0	0	0	0	0	2	2
812	0	0	0	0	0	0	0	0	3	1
813	0	0	0	0	0	0	0	0	1	2
814	0	0	0	0	0	0	0	0	0	1
815	0	0	0	0	0	0	0	0	1	1
816	0	0	0	0	0	0	0	0	3	2
817	0	0	0	0	0	0	0	1	2	2
818	0	0	0	0	0	0	0	0	2	2
819	0	0	0	0	0	0	0	0	3	2
820	0	0	0	0	0	0	1	0	2	2
821	0	0	0	0	0	0	1	0	2	1
822	0	0	0	0	0	0	0	0	3	1
823	0	0	0	0	0	0	0	1	0	3
824	0	0	0	0	0	0	0	0	1	1
825	0	0	0	0	0	0	0	0	2	1
826	0	0	0	0	0	0	2	0	1	2
827	0	0	0	0	0	0	0	0	4	3
828	0	0	0	0	0	0	0	1	0	3
829	0	0	0	0	0	0	0	0	1	3
830	0	0	0	0	0	0	0	0	3	1
831	0	0	0	0	0	0	0	0	1	2
832	0	0	0	0	0	0	0	0	2	2
833	0	0	0	0	0	0	0	0	1	4
834	0	0	0	0	0	0	0	0	3	1
835	0	0	0	0	0	0	0	0	2	2
836	0	0	0	0	0	0	0	0	3	3
837	0	0	0	0	0	0	0	0	2	2
838	0	0	0	0	0	0	0	0	1	1
839	0	0	0	0	0	0	0	0	1	1
840	0	0	0	0	0	0	1	0	2	1
841	0	0	0	0	0	0	0	0	1	3
842	0	0	0	0	0	0	0	0	2	3
843	0	0	0	0	0	0	0	1	2	4
844	0	0	0	0	0	0	0	0	2	2
845	1	0	0	0	0	0	0	0	2	2
846	1	0	0	0	0	0	0	0	3	3
847	0	0	0	1	0	0	0	1	3	2
848	0	0	0	1	0	0	0	0	2	1
849	0	0	0	0	0	0	0	0	0	2
850	0	0	0	0	0	0	0	0	1	2
851	1	0	0	0	0	0	0	1	1	2
852	0	0	0	0	0	0	0	0	2	2
853	0	0	0	0	0	0	0	0	1	1
854	1	0	0	0	0	0	0	0	1	1
855	0	0	0	0	0	0	0	0	2	2
856	0	0	0	0	0	0	0	0	2	2
857	0	0	0	0	0	0	0	0	2	2
858	0	0	0	0	0	0	0	0	1	2
859	0	0	0	0	0	0	0	0	2	2
860	1	0	0	0	0	0	0	0	4	1
861	0	0	0	0	0	0	0	0	2	3
862	0	0	0	0	0	0	0	0	4	4
863	0	0	0	0	0	0	1	0	2	2
864	0	0	0	0	0	0	0	0	2	3
865	0	0	0	0	0	0	0	0	2	1
866	0	0	0	0	0	0	0	0	2	3
867	0	0	0	0	0	0	0	0	1	0
868	0	0	0	0	0	0	0	0	2	3
869	0	0	0	0	0	0	0	0	4	1
870	0	0	0	0	0	0	0	0	2	4
871	0	0	0	0	0	0	0	0	3	2
872	0	0	0	0	0	0	0	0	3	2
873	0	0	0	0	0	0	0	1	2	3
874	0	0	0	0	0	0	0	0	3	2
875	0	0	0	0	0	0	1	0	2	3
876	0	0	0	0	0	0	0	0	2	2
877	0	0	0	0	0	0	0	0	3	1
878	0	0	0	0	0	0	0	0	2	3
879	0	0	0	0	0	0	0	0	3	4
880	0	0	0	0	0	0	0	0	2	3
881	0	0	0	0	0	0	0	0	2	2
882	0	0	0	0	0	0	0	0	1	3
883	0	0	0	0	0	0	0	0	1	2
884	0	0	0	0	0	0	1	0	2	3
885	0	1	0	0	0	0	0	1	2	3
886	0	1	0	0	0	0	0	1	3	1
887	0	0	0	0	0	0	0	0	2	4
888	0	0	0	0	0	0	0	0	1	1
889	0	0	0	0	0	0	0	1	2	3
890	0	0	0	0	0	0	0	0	2	2
891	0	0	0	0	0	0	1	0	2	1
892	0	0	0	0	0	0	0	0	0	1
893	0	0	0	0	0	0	0	0	1	1
894	0	0	0	0	0	0	0	0	3	2
895	0	0	0	0	0	0	0	0	2	3
896	0	0	0	0	0	0	0	1	3	1
897	0	0	0	0	0	0	0	0	2	2
898	0	0	0	0	0	0	0	0	3	4
899	0	0	0	0	0	0	0	0	3	3
900	0	0	0	0	0	0	0	0	1	1
901	0	0	0	0	0	0	0	0	1	2
902	0	0	1	0	0	0	0	0	3	2
903	0	0	0	0	0	0	0	0	0	4
904	0	0	0	0	0	0	0	0	1	2
905	0	0	0	0	0	0	0	0	1	3
906	0	0	0	1	0	0	0	0	0	2
907	0	0	0	1	0	0	0	0	2	3
908	0	0	0	0	0	0	0	0	0	2
909	0	0	0	0	0	0	0	0	0	2
910	0	0	0	0	0	0	0	0	2	2
911	0	0	0	0	0	0	0	0	3	2
912	0	0	0	0	0	0	0	1	3	4
913	0	0	0	1	0	0	0	1	2	1
914	0	0	0	0	0	0	1	0	1	2
915	0	0	0	0	0	0	0	0	2	2
916	0	0	0	0	0	0	0	1	2	3
917	0	0	0	0	0	0	0	1	2	1
918	0	0	0	0	0	0	0	1	2	4
919	0	0	0	0	0	0	0	0	1	2
920	0	0	0	0	0	0	0	0	1	4
921	0	0	0	0	0	0	0	0	2	3
922	0	0	0	0	0	0	0	0	2	3
923	0	0	0	0	0	0	0	0	1	2
924	0	0	0	0	0	0	0	0	2	2
925	0	0	0	0	0	0	0	0	1	3
926	0	0	0	0	0	0	0	0	3	3
927	0	0	0	0	0	0	0	0	1	2
928	0	0	0	0	0	0	0	0	2	2
929	0	0	0	0	0	0	0	0	3	1
930	0	0	0	0	0	0	0	0	2	4
931	0	0	0	0	0	0	0	0	2	1
932	0	0	0	0	0	0	0	0	2	3
933	0	0	0	0	0	0	0	1	2	2
934	0	0	0	0	0	0	0	0	1	2
935	0	0	0	0	0	0	0	0	1	2
936	0	0	0	0	0	0	0	0	2	3
937	0	0	0	0	1	0	0	0	1	3
938	0	0	0	0	0	0	0	0	2	1
939	0	0	0	0	0	0	0	0	2	2
940	0	0	0	0	0	0	0	0	2	2
941	0	0	0	0	0	0	0	0	2	3
942	0	0	0	0	0	0	0	0	3	3
943	0	0	0	0	0	0	0	0	1	1
944	0	0	0	0	0	0	0	0	2	3
945	1	0	0	0	0	0	0	1	3	2
946	0	0	0	0	0	0	0	0	1	3
947	1	0	0	0	0	0	0	0	3	1
948	0	0	0	0	0	0	0	0	2	2
949	0	0	0	1	0	0	0	0	1	3
950	0	0	0	0	0	0	0	0	2	2
951	1	0	0	0	0	0	0	0	1	2
952	0	0	0	0	0	0	0	0	1	2
953	0	0	0	0	0	0	0	0	3	1
954	0	0	0	1	0	0	0	0	0	3
955	0	0	0	0	0	0	0	0	1	2
956	1	0	0	1	0	0	0	0	0	3
957	0	0	0	0	0	0	0	0	4	1
958	0	0	0	0	1	0	0	0	2	1
959	0	0	0	0	0	0	0	0	2	4
960	0	0	0	0	1	0	0	0	2	3
961	0	0	0	0	0	0	0	0	3	1
962	0	0	0	0	0	0	0	0	2	2
963	0	0	0	0	0	0	0	0	2	4
964	0	0	0	0	0	0	0	0	1	3
965	0	0	0	0	1	0	0	0	1	3
966	0	0	0	0	0	0	0	0	3	2
967	0	0	0	0	0	0	0	0	3	2
968	1	0	0	0	0	0	0	0	3	3
969	0	0	0	0	0	0	0	0	2	2
970	0	0	0	0	0	0	0	0	3	3
971	0	0	0	0	0	0	0	0	2	1
972	1	0	0	0	0	0	0	0	3	1
973	0	0	0	0	0	0	0	0	1	1
974	0	0	0	0	0	0	0	0	2	2
975	0	0	0	0	0	0	0	0	2	2
976	0	0	0	0	1	0	0	0	3	2
977	0	0	1	0	0	0	0	0	2	2
978	0	0	0	0	0	0	0	0	3	0
979	0	0	0	0	0	0	0	0	3	2
980	0	1	0	0	0	0	0	0	1	2
981	0	0	1	0	1	0	0	0	2	2
982	0	0	1	0	0	0	0	0	2	1
983	0	0	1	0	0	0	0	0	1	2
984	0	0	0	0	0	0	0	0	3	1
985	0	0	1	1	0	0	0	0	3	2
986	0	0	0	0	0	0	0	0	1	2
987	0	0	1	0	0	0	0	0	2	1
988	0	0	0	0	0	0	0	0	1	1
989	0	0	1	0	0	0	0	0	3	1
990	0	0	0	0	0	0	0	0	0	1
991	0	1	1	0	0	0	0	0	2	1
992	0	0	1	0	0	0	0	0	2	1
993	0	0	0	0	0	0	0	0	3	3
994	0	0	1	0	0	0	0	0	2	2
995	0	0	0	0	0	0	0	0	2	2
996	0	0	1	0	0	0	0	0	2	1
997	0	0	1	0	0	0	0	0	0	1
998	0	0	1	0	0	0	0	0	2	2
999	0	0	1	0	0	0	0	0	2	2
1000	0	0	1	0	0	0	0	0	1	2
1001	0	0	1	0	0	0	0	0	3	2
1002	0	0	0	0	0	0	0	0	2	2
1003	0	0	1	0	0	0	0	0	2	4
1004	0	0	1	0	0	0	0	0	1	1
1005	0	0	1	0	0	0	0	0	1	1
1006	0	0	1	0	0	0	0	0	1	1
1007	0	0	0	0	0	0	0	0	3	2
1008	0	0	0	0	0	0	0	0	3	3
1009	0	0	1	0	0	0	0	0	0	1
1010	0	0	1	0	0	0	0	0	3	2
1011	0	0	0	0	0	0	0	0	3	1
1012	0	0	0	0	0	0	0	0	3	2
1013	0	0	1	0	0	0	0	0	1	3
1014	0	0	0	0	0	0	0	0	2	2
1015	0	0	0	0	0	0	0	0	1	4
1016	0	0	0	0	0	0	0	0	3	2
1017	0	0	0	0	0	1	0	0	2	0
1018	0	0	1	0	0	0	0	0	1	2
1019	0	1	0	0	0	0	0	0	4	2
1020	0	0	0	0	0	0	0	0	2	1
1021	0	1	0	0	0	1	0	0	2	1
1022	0	0	1	1	0	0	0	0	3	0
1023	0	0	1	0	0	0	1	0	1	1
1024	0	0	1	0	0	0	0	0	2	3
1025	0	0	0	0	0	0	0	0	2	2
1026	0	0	1	0	0	0	0	0	2	1
1027	0	0	1	0	0	0	0	0	1	4
1028	0	0	0	0	0	0	0	0	2	1
1029	1	0	0	0	0	0	0	0	2	2
1030	0	0	0	0	0	0	0	0	2	1
1031	0	1	1	0	0	0	0	0	2	3
1032	0	0	0	0	0	0	0	0	2	2
1033	0	0	0	0	0	0	0	0	2	2
1034	0	0	0	0	0	0	0	0	2	1
1035	0	0	0	0	0	0	0	0	2	4
1036	1	1	1	0	0	0	0	0	2	3
1037	0	0	0	0	0	0	1	0	0	1
1038	0	0	0	0	0	0	0	0	1	2
1039	0	0	0	0	0	0	0	0	2	2
1040	0	0	0	0	0	0	1	0	3	2
1041	0	1	1	0	0	0	0	0	2	2
1042	0	0	0	0	0	0	0	0	2	2
1043	0	0	1	0	0	0	0	0	1	1
1044	0	1	1	0	0	0	0	0	4	1
1045	0	2	1	0	0	0	0	0	1	3
1046	0	2	0	0	0	0	0	0	2	2
1047	0	0	1	0	0	0	0	0	2	2
1048	0	1	1	0	0	0	0	0	3	2
1049	0	2	1	0	0	0	0	0	1	1
1050	0	2	0	0	0	0	0	0	3	1
1051	0	0	1	0	0	0	0	0	3	3
1052	0	0	0	0	0	0	1	0	2	2
1053	0	0	0	0	0	0	0	0	2	2
1054	0	0	1	0	0	0	1	0	1	1
1055	1	0	1	0	0	0	0	0	3	3
1056	0	1	1	0	0	0	1	0	0	2
1057	1	1	1	0	0	0	0	0	3	2
1058	1	1	0	0	0	0	0	0	1	1
1059	1	1	0	0	0	0	0	0	1	0
1060	0	0	1	0	0	0	0	0	2	1
1061	1	1	1	0	0	0	0	0	1	1
1062	0	2	0	0	0	0	0	0	2	1
1063	1	0	0	0	0	0	0	0	0	3
1064	0	0	1	1	0	0	0	0	3	2
1065	0	0	1	0	0	0	0	0	4	2
1066	0	0	1	0	0	0	0	0	4	1
1067	0	1	0	0	0	0	0	0	2	1
1068	0	0	1	0	0	0	0	1	3	1
1069	0	0	1	0	0	0	0	0	3	2
1070	1	0	1	0	0	0	0	0	1	2
1071	0	1	1	0	0	0	0	0	2	2
1072	0	1	1	0	0	0	0	0	2	2
1073	0	0	0	0	0	0	0	0	1	2
1074	1	0	1	0	0	0	0	0	4	3
1075	0	0	0	0	0	0	0	0	1	2
1076	0	2	1	0	0	0	0	0	2	3
1077	0	2	1	0	0	0	0	0	3	2
1078	1	0	1	0	0	0	0	0	2	1
1079	0	0	1	0	0	0	0	0	3	3
1080	0	0	0	0	0	0	0	0	3	2
1081	0	1	1	0	0	0	0	0	3	1
1082	0	0	1	0	0	0	1	0	3	2
1083	1	0	0	0	0	0	0	0	2	2
1084	0	0	0	0	0	0	0	0	1	2
1085	0	0	0	0	0	0	0	0	2	1
1086	0	0	0	0	0	0	0	0	0	1
1087	0	1	1	0	0	0	0	0	2	3
1088	1	1	1	0	0	0	0	0	2	1
1089	0	0	0	0	0	0	0	0	2	2
1090	0	0	0	0	0	0	0	0	1	2
1091	0	0	0	0	0	0	0	0	2	2
1092	0	2	0	0	0	0	0	0	1	1
1093	0	0	0	0	0	0	0	0	1	3
1094	1	0	0	0	0	0	0	0	2	1
1095	0	1	1	0	0	0	0	0	3	2
1096	0	0	1	0	0	0	0	0	2	2
1097	0	1	1	0	0	0	0	0	1	0
1098	0	1	1	0	0	0	0	0	1	2
1099	0	1	1	0	0	0	0	0	2	1
1100	0	0	1	0	0	0	0	0	1	1
1101	1	0	0	0	0	0	0	0	2	4
1102	1	1	1	0	0	0	0	0	2	2
1103	1	1	0	0	0	0	0	0	2	3
1104	0	1	0	0	0	0	1	0	3	3
1105	0	1	0	0	0	0	0	0	1	2
1106	1	0	1	0	0	0	0	0	2	3
1107	0	0	0	0	0	0	0	0	1	1
1108	0	0	0	0	0	0	0	0	1	1
1109	0	0	0	0	0	0	0	0	1	2
1110	0	0	0	0	0	0	1	0	2	3
1111	0	0	1	0	0	0	1	0	2	3
1112	0	0	0	0	0	0	0	0	2	2
1113	0	0	1	0	0	0	0	0	3	2
1114	0	1	1	0	0	0	2	0	4	2
1115	0	0	1	0	0	1	0	0	3	1
1116	1	2	1	0	0	0	0	0	1	2
1117	0	0	1	0	0	0	0	0	2	2
1118	0	0	0	0	0	0	0	0	2	0
1119	0	0	0	0	0	0	0	0	2	2
1120	1	0	1	0	0	0	0	0	1	4
1121	0	0	0	0	0	0	0	0	2	1
1122	0	0	0	0	0	0	1	0	3	2
1123	0	1	0	0	0	0	0	0	1	1
1124	1	0	0	0	0	0	1	0	1	3
1125	0	0	0	0	0	1	0	0	3	1
1126	1	0	1	0	0	0	0	0	0	3
1127	0	0	1	0	0	0	0	0	1	2
1128	0	1	0	0	0	0	0	0	1	3
1129	0	0	0	0	0	0	0	0	3	2
1130	0	1	0	0	0	0	0	0	1	1
1131	0	0	0	0	0	0	0	0	3	3
1132	1	0	1	0	0	0	0	0	4	1
1133	0	0	1	0	0	0	0	0	2	2
1134	0	0	0	0	0	0	0	0	3	2
1135	0	0	0	0	0	0	0	0	2	2
1136	1	0	0	0	0	0	0	0	3	1
1137	0	0	1	0	0	0	0	0	2	3
1138	0	0	0	0	0	0	0	0	2	2
1139	0	1	1	0	0	0	0	0	2	2
1140	0	1	0	0	0	0	0	0	3	3
1141	0	0	0	0	0	0	0	0	3	2
1142	0	0	2	0	0	0	0	0	4	1
1143	0	0	0	0	0	0	0	0	1	2
1144	0	1	0	0	0	0	0	0	3	2
1145	1	1	0	0	0	0	0	0	2	1
1146	1	0	1	0	0	0	0	0	2	2
1147	0	1	0	0	0	0	0	0	2	2
1148	0	0	0	0	0	0	0	0	1	2
1149	0	0	1	0	0	0	0	0	3	1
1150	0	0	0	0	0	0	0	0	2	1
1151	0	0	0	0	0	0	0	0	3	1
1152	0	0	0	0	0	0	0	0	1	2
1153	0	0	0	0	0	0	1	0	1	2
1154	0	2	1	0	0	0	1	0	2	1
1155	0	0	1	0	0	0	0	0	3	2
1156	1	0	0	0	0	0	0	0	2	3
1157	0	0	0	0	0	0	0	0	2	1
1158	0	1	1	0	0	0	0	0	3	1
1159	1	0	1	0	0	0	0	0	1	2
1160	0	1	0	0	0	0	0	0	3	2
1161	0	1	1	0	0	0	1	0	2	2
1162	1	0	0	0	0	0	0	0	1	2
1163	0	0	0	0	0	0	0	0	2	3
1164	0	1	1	0	0	0	0	0	3	2
1165	1	0	0	0	0	0	0	0	0	0
1166	0	0	0	0	0	0	1	0	2	1
1167	0	1	0	0	0	0	0	0	3	2
1168	1	0	0	0	0	0	0	0	2	2
1169	0	0	0	0	0	0	0	0	1	1
1170	1	0	1	0	0	0	1	0	1	2
1171	0	0	0	0	0	0	0	0	2	2
1172	0	0	0	0	0	0	0	0	2	1
1173	1	0	0	0	0	0	0	0	2	2
1174	0	0	1	0	0	0	0	0	3	1
1175	0	0	1	0	0	0	0	0	4	3
1176	1	0	0	0	0	0	0	0	3	3
1177	0	0	0	0	0	0	0	0	3	3
1178	0	0	0	0	0	0	0	0	1	2
1179	0	0	0	0	0	0	0	0	2	3
1180	1	0	0	0	0	0	0	0	2	2
1181	1	0	0	0	0	0	0	0	3	3
1182	1	0	0	0	0	0	0	0	4	2
1183	1	0	0	0	0	0	0	0	3	2
1184	1	0	0	0	0	0	0	0	2	1
1185	0	1	0	0	0	0	0	0	2	1
1186	0	0	0	0	0	0	0	0	0	4
1187	1	0	1	0	0	0	0	0	2	2
1188	0	1	1	0	0	0	0	0	2	2
1189	1	0	1	0	0	0	0	0	2	1
1190	1	0	1	0	0	0	0	0	2	2
1191	1	0	1	0	0	0	0	0	2	2
1192	1	1	1	0	0	0	0	0	1	2
1193	0	1	0	0	0	0	0	0	1	1
1194	0	1	0	0	0	0	0	0	3	2
1195	0	1	0	0	0	0	0	0	1	2
1196	1	0	0	0	0	0	0	0	4	2
1197	0	0	0	0	0	0	0	0	1	3
1198	2	1	0	0	0	0	0	0	3	3
1199	1	0	0	0	0	0	0	0	2	2
1200	0	1	1	0	0	0	0	0	1	3
1201	1	0	0	0	0	0	0	0	2	1
1202	1	0	0	0	0	0	0	0	1	0
1203	0	0	0	0	0	0	0	0	3	1
1204	1	0	0	0	0	0	0	0	2	1
1205	2	0	0	0	0	0	0	0	3	2
1206	0	0	1	0	0	0	0	0	3	1
1207	0	0	1	0	0	0	0	0	4	2
1208	0	1	0	0	0	0	0	1	2	1
1209	0	1	1	0	0	0	0	0	2	0
1210	0	1	0	0	0	0	0	0	1	1
1211	0	0	0	0	0	0	0	0	2	1
1212	1	0	0	0	0	0	0	0	1	1
1213	1	0	1	0	0	0	0	0	2	1
1214	1	0	1	0	0	0	0	0	2	1
1215	0	1	1	0	0	0	0	0	2	3
1216	1	0	1	0	0	0	0	0	4	2
1217	1	0	0	0	0	0	0	0	2	0
1218	1	0	0	0	0	0	0	0	1	2
1219	1	0	1	0	0	0	0	0	1	2
1220	1	0	1	0	0	0	0	0	2	0
1221	0	1	1	0	0	0	0	0	1	2
1222	0	0	1	0	0	0	0	0	2	1
1223	0	0	1	0	0	0	0	0	4	2
1224	0	0	1	0	0	0	0	0	2	2
1225	1	0	0	0	0	0	0	0	4	2
1226	1	0	0	0	0	0	1	0	2	1
1227	1	0	1	0	0	0	0	0	4	3
1228	1	0	0	0	0	0	0	0	2	2
1229	1	0	1	0	0	0	0	0	3	3
1230	1	1	1	0	0	0	0	0	2	2
1231	1	1	1	0	0	0	0	0	1	2
1232	2	0	1	0	0	0	0	0	3	0
1233	2	0	0	0	0	0	0	0	2	2
1234	0	0	1	0	0	0	0	0	4	2
1235	0	0	1	0	0	0	0	0	1	1
1236	2	1	0	0	0	0	0	0	2	3
1237	0	0	0	0	0	0	1	0	1	1
1238	1	0	0	0	0	0	0	0	2	2
1239	2	0	1	0	0	0	0	0	3	1
1240	1	0	1	0	0	0	0	1	1	2
1241	2	1	1	0	0	0	0	0	2	1
1242	2	1	0	0	0	0	0	0	2	0
1243	3	1	1	0	0	0	1	0	3	3
1244	1	0	1	0	0	0	0	0	2	1
1245	2	0	1	0	0	0	0	0	2	2
1246	1	0	0	0	0	0	0	0	2	2
1247	1	1	1	0	0	0	0	0	2	0
1248	1	0	0	0	0	0	0	0	3	2
1249	0	1	0	0	0	0	0	0	1	2
1250	0	0	0	0	0	0	0	0	3	3
1251	1	0	0	0	0	0	0	0	0	2
1252	1	1	0	0	0	0	0	1	2	1
1253	0	0	1	0	0	0	1	0	2	2
1254	1	1	1	0	0	0	0	0	3	1
1255	1	1	0	0	0	0	0	0	4	2
1256	0	1	1	0	0	0	0	1	1	3
1257	1	0	0	0	0	0	0	0	3	1
1258	0	1	1	0	0	0	0	0	3	2
1259	2	1	0	0	0	0	0	0	1	3
1260	1	1	1	0	0	0	1	0	2	2
1261	1	0	0	0	0	0	1	0	3	1
1262	1	1	0	0	0	0	2	0	4	0
1263	0	1	0	0	0	0	0	0	1	4
1264	0	0	0	0	0	0	0	0	1	1
1265	0	1	0	0	0	0	0	0	1	2
1266	0	1	0	0	0	0	0	0	0	2
1267	1	0	0	0	0	0	0	0	2	2
1268	1	1	0	0	0	0	0	0	1	2
1269	0	0	0	0	0	0	0	0	3	0
1270	2	1	0	0	0	0	0	0	2	2
1271	1	1	0	0	0	0	0	0	1	0
1272	1	1	0	0	0	0	0	0	3	2
1273	0	0	0	0	0	0	0	0	1	2
1274	2	0	0	0	0	0	0	0	2	2
1275	1	0	0	0	0	0	1	0	2	2
1276	1	1	0	0	0	0	0	0	2	0
1277	2	0	0	0	0	0	0	0	3	1
1278	2	0	0	0	0	0	0	0	2	2
1279	1	1	0	0	0	0	0	0	4	1
1280	2	1	0	0	0	0	0	0	2	3
1281	2	0	0	0	0	0	0	0	4	1
1282	1	0	0	0	0	0	0	0	1	1
1283	1	1	0	0	0	0	0	0	1	1
1284	2	0	0	0	0	0	0	0	1	1
1285	1	0	0	0	0	0	0	0	2	2
1286	1	0	0	0	0	0	0	0	2	1
1287	0	0	0	0	0	0	0	0	3	3
1288	1	2	0	0	0	0	0	0	2	0
1289	1	1	0	0	0	0	0	0	0	2
1290	2	0	0	0	0	0	0	1	0	3
1291	1	1	0	0	0	0	1	1	3	2
1292	2	1	0	0	0	0	0	0	2	1
1293	1	0	0	0	0	0	1	0	2	1
1294	0	1	0	0	0	0	0	0	3	3
1295	2	0	0	0	0	0	1	0	2	0
1296	1	0	0	0	0	0	0	0	3	2
1297	2	1	0	0	0	0	1	0	2	1
1298	0	0	0	0	0	0	0	0	2	2
1299	1	1	0	0	0	0	0	0	3	3
1300	0	1	0	0	0	0	0	0	2	0
1301	0	1	0	0	0	0	0	0	2	3
1302	0	0	0	0	0	0	0	0	2	1
1303	0	0	0	0	0	0	0	0	2	1
1304	1	0	0	0	0	0	0	0	0	3
1305	2	1	0	0	0	0	0	0	3	2
1306	1	0	0	0	0	0	0	0	1	2
1307	0	0	0	0	0	0	1	0	2	1
1308	2	0	0	0	0	0	0	0	2	2
1309	1	0	0	0	0	0	0	0	3	1
1310	2	0	0	0	0	0	0	0	2	1
1311	2	1	0	0	0	0	0	0	1	1
1312	2	1	0	0	0	0	0	0	1	1
1313	0	1	0	0	0	0	0	0	2	2
1314	1	2	0	0	0	0	0	0	3	1
1315	0	0	0	0	0	0	1	0	0	0
1316	2	0	0	0	0	0	0	0	3	1
1317	0	0	0	0	0	0	0	0	2	3
1318	0	1	0	0	0	0	0	0	1	1
1319	2	1	0	0	0	0	0	0	3	2
1320	1	0	0	0	0	0	0	0	1	2
1321	0	1	0	0	0	0	0	0	1	0
1322	1	1	0	0	0	0	0	0	1	1
1323	0	1	0	0	0	0	0	0	2	2
1324	1	0	0	0	0	0	0	0	3	2
1325	1	0	0	1	0	0	0	0	1	2
1326	2	0	0	0	0	0	0	0	3	2
1327	1	1	0	0	0	0	0	0	1	1
1328	1	0	0	0	0	0	0	0	2	0
1329	2	1	0	0	0	0	1	0	3	1
1330	2	0	0	0	0	0	0	0	2	2
1331	0	0	0	0	0	0	0	0	2	1
1332	2	0	0	0	0	0	0	0	2	1
1333	1	1	0	0	0	0	0	0	2	2
1334	0	1	0	0	0	0	0	0	1	2
1335	1	0	0	0	0	0	1	0	1	3
1336	1	0	0	0	0	0	0	0	1	1
1337	1	1	0	0	0	0	0	0	2	1
1338	1	1	0	0	0	0	0	0	1	2
1339	1	1	0	0	0	0	0	0	2	3
1340	0	0	0	0	0	0	0	0	1	2
1341	0	2	0	0	0	0	0	0	1	1
1342	0	0	0	0	0	0	0	0	1	2
1343	1	1	0	0	0	0	0	0	4	1
1344	1	0	0	0	0	0	1	0	3	2
1345	0	0	0	0	0	0	0	0	1	0
1346	1	0	0	0	0	0	0	0	2	1
1347	0	1	0	1	0	0	0	0	1	2
1348	1	0	0	1	0	0	0	1	0	1
1349	1	0	0	1	0	0	0	0	3	1
1350	0	1	0	1	0	0	0	0	2	1
1351	1	1	0	1	0	0	0	0	2	2
1352	0	0	0	0	0	0	1	0	0	3
1353	0	0	0	1	0	0	0	0	1	1
1354	1	1	0	0	0	0	0	0	1	0
1355	1	0	0	1	0	0	0	0	3	2
1356	0	0	0	1	0	0	0	0	3	1
1357	0	1	0	1	0	0	0	0	4	3
1358	3	1	0	1	0	0	0	0	3	2
1359	0	1	0	1	0	0	0	0	2	1
1360	0	1	0	1	0	0	0	0	1	1
1361	1	1	0	1	0	0	0	0	2	1
1362	0	1	0	1	0	0	0	0	1	3
1363	1	0	0	1	0	0	0	0	2	1
1364	1	1	0	1	0	0	1	0	2	2
1365	0	0	0	0	0	0	1	0	2	2
1366	0	1	0	0	0	0	0	1	2	2
1367	0	0	0	1	0	0	1	0	1	1
1368	0	1	0	2	0	0	1	0	2	1
1369	1	1	0	0	0	0	0	0	1	1
1370	1	1	0	1	0	0	1	0	2	1
1371	0	1	0	1	0	1	0	0	1	2
1372	0	0	0	0	0	0	1	0	1	1
1373	0	0	0	1	0	0	0	0	3	3
1374	0	1	0	1	0	0	1	0	1	2
1375	1	1	0	1	0	0	0	0	2	2
1376	0	1	0	1	0	0	1	0	1	1
1377	0	1	0	1	0	0	0	0	2	3
1378	0	1	0	1	0	0	0	0	1	2
1379	0	1	0	1	0	0	0	0	2	2
1380	0	1	0	1	0	0	0	0	1	2
1381	0	0	0	1	0	0	0	0	1	1
1382	0	0	0	1	0	0	1	0	3	0
1383	0	0	0	0	0	0	0	0	1	2
1384	0	0	0	1	0	0	0	0	1	3
1385	0	0	0	1	0	0	0	0	3	2
1386	0	1	0	1	0	0	0	0	2	2
1387	0	1	0	1	0	0	0	0	2	2
1388	0	1	0	1	0	0	0	0	3	2
1389	0	0	0	1	0	0	0	0	2	1
1390	0	0	0	0	0	0	0	0	2	2
1391	0	0	0	1	0	0	1	0	3	3
1392	0	0	0	0	0	0	0	0	2	1
1393	0	1	0	1	0	0	1	0	1	3
1394	0	0	0	1	0	0	0	0	2	0
1395	0	0	0	1	0	0	0	0	3	2
1396	0	1	0	0	0	0	0	0	1	2
1397	0	0	1	1	0	0	1	0	3	3
1398	0	1	0	1	0	0	0	0	3	2
1399	0	0	0	0	0	0	0	0	1	2
1400	0	1	0	0	0	0	0	0	3	3
1401	0	0	0	1	0	0	0	0	2	2
1402	0	1	0	0	0	0	0	0	3	3
1403	0	0	1	1	0	0	0	0	2	1
1404	0	1	0	0	0	0	0	0	0	2
1405	0	1	0	1	0	0	0	0	4	3
1406	0	0	0	1	0	0	0	0	2	2
1407	0	0	0	0	0	0	0	0	1	1
1408	0	1	0	1	0	0	0	0	3	2
1409	0	1	0	1	0	0	0	0	3	2
1410	0	1	0	1	0	0	1	0	3	2
1411	0	0	0	0	0	0	0	0	2	2
1412	0	0	0	0	0	0	0	0	2	2
1413	0	0	0	0	0	0	0	0	3	1
1414	0	0	0	0	0	0	0	0	2	1
1415	0	0	0	0	0	0	0	0	2	2
1416	0	0	0	0	0	0	0	0	1	1
1417	0	0	0	0	0	0	0	0	2	1
1418	0	0	0	0	0	0	0	0	3	1
1419	0	1	0	0	0	0	0	0	0	2
1420	0	0	0	0	0	0	0	0	2	2
1421	0	0	0	0	0	0	0	0	3	1
1422	0	0	0	0	0	0	0	0	4	0
1423	0	0	0	0	0	0	0	0	2	1
1424	0	0	0	0	0	0	0	0	1	1
1425	0	0	0	0	0	0	0	0	4	1
1426	0	0	0	0	0	0	0	0	3	2
1427	0	0	0	0	0	0	0	0	1	3
1428	0	0	0	0	0	0	0	0	2	1
1429	0	1	0	0	0	0	0	0	0	1
1430	0	0	0	0	0	0	1	0	1	2
1431	0	0	0	0	0	0	0	0	1	2
1432	0	0	0	0	0	0	0	0	3	1
1433	0	1	0	0	0	0	0	0	1	2
1434	0	0	0	0	0	0	1	0	2	1
1435	0	0	0	0	0	0	0	0	2	3
1436	0	0	0	0	0	0	0	0	2	0
1437	0	1	0	0	0	0	1	0	1	0
1438	0	0	0	0	0	0	0	0	2	2
1439	0	0	0	0	0	0	1	0	2	1
1440	0	1	0	0	0	0	0	0	2	1
1441	0	1	0	0	0	0	2	0	2	0
1442	0	0	0	0	0	0	0	0	1	2
1443	0	1	0	0	0	0	0	0	2	2
1444	0	1	0	0	0	0	0	0	2	2
1445	0	0	0	0	0	0	1	0	3	3
1446	0	0	0	0	0	0	1	0	3	2
1447	0	0	0	0	0	0	0	0	3	2
1448	0	0	0	0	0	0	1	0	1	2
1449	0	1	0	0	0	0	0	0	2	3
1450	0	0	0	0	0	0	0	0	2	2
1451	0	0	0	0	0	0	0	0	2	2
1452	0	0	0	0	0	0	0	0	2	2
1453	0	1	0	0	0	0	0	0	3	2
1454	0	1	0	0	0	0	0	0	3	3
1455	0	1	0	0	0	0	0	0	3	3
1456	0	1	0	0	0	0	0	0	1	1
1457	0	1	0	0	0	0	0	0	3	1
1458	0	1	0	1	0	0	0	0	2	3
1459	0	1	0	0	0	0	0	0	2	2
1460	0	1	0	0	0	0	0	0	2	2
1461	0	0	0	0	0	0	1	0	4	2
1462	0	1	0	0	0	0	0	0	2	1
1463	0	1	0	0	0	0	0	0	2	0
1464	0	1	0	0	0	0	0	0	1	1
1465	0	1	0	0	0	0	0	0	0	0
1466	0	0	0	0	0	0	1	0	3	0
1467	0	1	0	0	0	0	1	0	2	2
1468	0	1	0	0	0	0	0	0	1	1
1469	0	1	0	0	0	0	0	0	1	3
1470	0	2	0	1	0	0	1	0	2	3
1471	0	1	0	0	0	0	1	0	3	1
1472	0	0	0	0	0	0	0	0	2	2
1473	0	1	0	0	0	0	0	0	2	2
1474	0	0	0	0	0	0	0	0	2	1
1475	0	0	0	0	0	0	1	0	1	2
1476	0	1	0	0	0	0	0	0	2	2
1477	0	1	0	0	0	0	0	0	2	2
1478	0	0	0	1	0	0	0	0	2	3
1479	0	0	0	1	0	0	1	0	2	3
1480	0	0	0	1	0	0	0	0	3	1
1481	0	1	0	0	0	0	1	0	3	2
1482	0	0	0	0	0	0	1	0	1	3
1483	0	2	0	0	0	0	0	0	3	2
1484	0	2	0	0	0	0	1	0	1	2
1485	0	1	0	0	0	0	0	0	2	2
1486	0	1	0	0	0	0	0	0	2	2
1487	0	0	0	0	0	0	0	0	2	2
1488	0	2	0	0	0	0	0	0	3	1
1489	0	1	0	0	0	0	0	0	2	2
1490	0	1	0	0	0	0	1	0	1	1
1491	0	1	0	0	0	0	0	0	1	1
1492	0	1	0	0	0	0	1	0	3	2
1493	0	1	0	0	0	0	0	0	1	3
1494	0	0	0	0	0	0	1	0	2	2
1495	0	0	0	0	0	0	0	0	1	1
1496	0	1	0	0	0	0	1	0	1	2
1497	0	1	0	0	0	0	0	0	1	2
1498	0	2	0	0	0	0	0	0	2	2
1499	0	0	0	0	0	0	0	0	2	1
1500	0	0	0	0	0	0	0	0	2	1
1501	0	1	0	0	0	0	0	0	3	1
1502	0	0	0	0	0	0	0	0	3	1
1503	0	0	0	0	0	0	0	0	2	2
1504	0	0	0	0	0	0	0	0	2	2
1505	0	0	0	0	0	0	0	0	3	3
1506	0	0	0	0	0	0	0	0	1	3
1507	0	0	0	0	0	0	0	0	2	1
1508	0	0	0	0	0	0	0	0	2	3
1509	0	0	0	0	0	0	1	0	2	3
1510	0	0	0	0	0	0	0	0	3	3
1511	0	0	0	0	0	0	0	0	2	2
1512	0	0	0	0	0	0	0	1	1	2
1513	0	0	0	0	1	0	0	0	2	0
1514	0	0	0	0	0	0	1	0	2	1
1515	0	0	0	0	0	0	1	0	1	2
1516	0	0	0	0	0	0	0	0	1	1
1517	0	0	0	0	0	0	0	1	1	2
1518	0	0	0	0	0	0	0	0	0	2
1519	0	0	0	0	0	0	0	0	1	2
1520	0	0	0	0	0	0	1	0	2	1
1521	0	0	0	0	0	0	0	0	2	0
1522	0	0	0	0	0	0	0	0	1	1
1523	0	0	0	0	0	0	0	0	2	1
1524	0	0	0	0	0	0	1	0	2	2
1525	0	0	0	0	0	0	0	0	3	1
1526	0	0	0	0	0	0	0	0	2	1
1527	0	0	0	0	0	0	0	0	3	1
1528	0	0	0	0	0	0	0	0	2	1
1529	0	0	0	0	0	0	0	0	3	1
1530	0	0	0	0	0	0	0	0	1	1
1531	0	0	0	0	0	0	0	0	2	1
1532	0	0	0	0	0	0	0	0	1	2
1533	0	0	0	0	0	0	0	0	2	1
1534	0	0	0	0	0	0	0	0	4	1
1535	0	0	0	0	0	0	0	0	2	2
1536	0	0	0	0	0	0	0	0	2	0
1537	0	0	0	0	0	0	0	0	1	2
1538	0	0	0	0	0	0	0	0	1	1
1539	0	0	0	0	0	0	0	0	0	1
1540	0	0	0	0	0	0	0	0	2	5
1541	0	0	0	0	0	0	0	0	2	1
1542	0	0	0	0	0	0	0	0	2	2
1543	0	0	0	0	0	0	0	0	2	1
1544	0	0	0	0	0	0	0	0	1	1
1545	0	0	0	0	0	0	0	0	2	2
1546	0	0	0	0	0	0	0	0	2	2
1547	0	0	0	0	0	0	0	0	2	2
1548	0	0	0	0	0	0	0	0	2	1
1549	0	0	0	0	0	0	0	0	2	2
1550	0	0	0	0	0	0	0	0	2	2
1551	1	1	0	0	0	0	0	0	2	3
1552	1	1	0	1	0	0	0	0	1	2
1553	1	0	0	1	0	0	0	0	2	1
1554	0	1	0	1	0	0	0	0	2	0
1555	1	0	0	1	0	0	0	0	2	2
1556	1	0	0	1	0	0	0	0	1	2
1557	1	0	0	0	0	0	0	0	1	2
1558	0	0	0	1	0	0	0	0	2	1
1559	0	0	0	1	0	0	0	0	1	1
1560	0	0	0	1	0	0	0	0	1	3
1561	1	0	0	0	0	0	0	0	2	3
1562	0	0	0	1	0	0	0	0	0	1
1563	0	0	0	1	0	0	0	0	1	2
1564	0	0	0	1	0	0	0	0	1	1
1565	1	0	0	0	0	0	0	0	2	2
1566	1	0	0	0	0	0	0	0	2	3
1567	1	0	0	0	0	0	0	0	2	2
1568	1	0	0	0	0	0	0	0	3	1
1569	0	0	0	0	0	0	0	0	1	3
1570	0	0	0	1	0	0	0	0	3	2
1571	1	0	0	0	0	0	0	0	3	2
1572	1	0	0	1	0	0	0	0	2	1
1573	1	0	0	1	0	0	0	0	3	3
1574	1	0	0	1	0	0	0	0	2	2
1575	1	0	0	1	0	0	0	0	3	1
1576	0	0	0	1	0	0	0	0	1	3
1577	1	0	0	0	0	0	0	0	2	2
1578	1	0	1	1	0	0	0	0	4	3
1579	0	0	0	1	0	0	0	0	2	3
1580	1	0	0	0	0	0	0	0	0	2
1581	1	0	0	1	0	0	0	0	4	2
1582	0	0	0	1	0	0	0	0	0	2
1583	0	0	0	0	0	0	0	0	2	3
1584	0	0	0	1	0	0	0	0	1	2
1585	1	0	0	1	0	0	0	0	3	3
1586	0	0	0	1	0	0	0	0	3	2
1587	0	0	0	1	0	0	0	0	2	3
1588	0	0	0	1	0	0	0	0	1	2
1589	0	0	0	1	0	0	0	0	4	0
1590	0	0	0	0	0	0	0	0	0	2
1591	1	0	0	0	0	0	0	0	3	3
1592	0	0	0	0	0	0	0	0	1	2
1593	0	0	0	0	0	0	0	0	3	2
1594	0	0	0	0	0	0	0	0	1	2
1595	0	0	0	0	0	0	0	0	2	3
1596	0	0	0	0	0	0	0	0	1	2
1597	1	0	0	0	0	0	0	0	3	3
1598	1	0	0	0	0	0	0	0	2	1
1599	0	0	0	0	0	0	0	0	2	2
1600	0	0	0	0	1	0	0	1	2	1
1601	0	0	0	0	0	0	0	0	3	2
1602	0	0	0	0	0	0	0	0	2	2
1603	1	0	0	0	0	0	0	0	0	1
1604	1	0	0	0	0	0	0	0	1	2
1605	0	0	0	0	0	0	1	0	1	2
1606	1	0	0	0	0	0	0	0	3	2
1607	1	0	0	0	0	0	0	0	3	1
1608	1	0	0	0	0	0	0	0	2	3
1609	1	0	0	0	0	0	0	0	2	0
1610	1	0	0	0	0	0	0	0	3	3
1611	1	0	0	0	0	0	1	0	1	1
1612	1	0	0	0	0	0	0	0	3	2
1613	1	1	0	0	0	0	0	0	3	1
1614	0	0	0	0	0	0	0	0	1	3
1615	0	0	0	0	0	0	0	0	2	3
1616	1	0	0	0	0	0	0	0	3	2
1617	0	0	0	0	0	0	1	0	0	3
1618	1	0	0	0	0	0	0	0	1	2
1619	1	0	0	0	0	0	1	0	2	2
1620	0	0	0	0	0	0	0	0	2	1
1621	0	0	0	0	0	0	0	0	2	1
1622	0	0	0	0	0	0	0	0	2	1
1623	0	0	0	0	0	0	0	0	4	1
1624	0	0	0	0	0	0	0	0	3	1
1625	0	0	0	0	0	0	1	0	3	3
1626	1	0	0	0	0	0	0	0	2	3
1627	1	0	0	0	0	0	0	0	2	1
1628	0	0	0	0	0	0	0	0	3	0
1629	1	0	0	0	0	0	1	0	1	1
1630	0	0	0	0	0	0	0	0	2	1
1631	0	0	0	0	0	0	0	0	3	0
1632	1	0	0	0	0	0	0	0	3	2
1633	0	0	0	0	0	0	0	0	2	1
1634	1	0	0	0	0	0	0	0	1	1
1635	1	0	0	0	0	0	0	0	2	2
1636	1	0	0	0	0	0	0	0	3	1
1637	1	0	0	0	0	0	0	0	1	1
1638	0	0	0	0	0	0	0	0	2	1
1639	0	0	0	0	0	0	0	0	3	1
1640	1	0	0	0	0	0	0	0	3	1
1641	0	0	0	0	0	0	0	0	2	2
1642	0	0	0	0	0	0	0	0	3	2
1643	0	0	0	0	0	0	0	0	2	0
1644	1	0	0	0	0	0	0	0	0	2
1645	0	0	0	0	0	0	1	0	0	2
1646	1	0	0	0	0	0	0	1	2	1
1647	0	0	0	0	0	0	0	0	1	2
1648	0	0	0	0	0	0	0	0	2	2
1649	1	0	0	0	0	0	0	0	0	0
1650	1	0	0	0	0	0	0	0	3	1
1651	1	0	0	0	0	0	0	0	2	2
1652	0	0	0	0	0	0	0	0	2	3
1653	0	0	0	0	0	0	0	0	2	2
1654	1	0	0	0	0	0	0	0	2	1
1655	1	0	0	0	0	0	1	0	2	2
1656	1	0	0	0	0	0	0	0	0	2
1657	1	1	0	0	0	0	1	0	4	2
1658	1	0	0	0	0	0	0	0	2	2
1659	1	0	0	1	0	0	1	0	2	2
1660	0	0	0	0	0	0	0	0	2	0
1661	1	0	0	0	0	0	0	0	2	1
1662	0	0	0	0	0	0	1	0	2	3
1663	0	1	0	0	0	0	0	0	3	1
1664	1	1	0	0	0	0	0	0	0	2
1665	1	1	0	0	0	0	0	0	1	3
1666	1	1	0	0	0	0	0	0	2	0
1667	0	1	0	0	0	0	0	0	2	1
1668	1	0	0	0	0	0	0	0	3	2
1669	1	0	0	0	0	0	0	0	0	2
1670	0	1	0	0	0	0	0	0	2	2
1671	1	1	0	1	0	0	0	0	1	3
1672	0	0	0	0	0	0	0	1	2	2
1673	0	0	0	1	0	0	0	0	1	1
1674	1	1	0	0	0	0	0	0	2	3
1675	1	1	0	1	0	0	0	0	3	1
1676	1	0	0	1	0	0	0	0	3	2
1677	0	0	0	0	0	0	0	0	0	2
1678	0	1	0	0	0	0	0	0	1	2
1679	1	1	0	0	0	0	0	0	2	1
1680	0	0	0	0	0	0	0	0	2	1
1681	0	1	0	0	0	0	0	0	3	3
1682	1	0	0	0	0	0	0	0	1	2
1683	0	0	0	0	0	0	0	0	3	1
1684	0	1	0	0	0	0	0	0	2	0
1685	1	1	0	0	0	0	0	0	3	2
1686	1	1	0	1	0	0	0	0	2	1
1687	1	0	0	1	0	0	0	0	1	3
1688	1	1	0	0	0	0	0	0	1	2
1689	0	1	0	1	0	0	0	0	2	2
1690	0	1	0	0	0	0	0	0	3	1
1691	1	0	0	1	0	0	0	0	2	3
1692	1	0	0	0	0	0	0	0	0	1
1693	0	0	0	0	0	0	0	0	0	2
1694	1	0	0	0	0	0	0	0	2	2
1695	0	0	0	0	0	0	0	0	1	1
1696	1	0	0	0	0	0	0	0	2	1
1697	0	0	0	0	0	0	0	0	1	3
1698	1	0	0	0	0	0	0	0	4	2
1699	1	0	0	0	0	0	0	0	2	1
1700	1	0	0	0	0	0	0	0	3	1
1701	1	1	0	0	0	0	0	0	3	2
1702	1	1	0	0	0	0	0	0	1	1
1703	1	0	0	0	0	0	0	0	2	2
1704	0	1	0	0	0	0	0	0	3	2
1705	1	1	0	0	0	0	0	0	2	1
1706	0	1	0	0	0	0	0	0	3	2
1707	0	1	0	1	0	0	0	0	3	1
1708	0	0	0	0	0	0	0	0	1	2
1709	0	1	0	0	0	0	0	0	2	1
1710	0	1	0	0	0	0	0	0	1	3
1711	0	1	0	0	0	0	0	0	1	3
1712	0	0	0	0	0	0	0	0	3	2
1713	1	0	0	0	0	0	0	0	2	2
1714	1	0	0	0	0	0	0	0	2	1
1715	0	0	0	0	0	0	0	0	3	1
1716	1	0	0	0	0	0	0	0	2	3
1717	0	0	0	0	0	0	0	0	2	1
1718	0	0	0	0	0	0	0	0	2	1
1719	0	0	0	0	0	0	0	0	2	1
1720	1	0	0	0	0	0	0	0	2	2
1721	1	0	0	0	0	0	0	0	3	2
1722	0	0	0	0	0	0	0	0	3	2
1723	1	0	0	0	0	0	0	0	2	2
1724	2	0	0	0	0	0	0	0	1	3
1725	0	0	0	0	0	0	0	0	3	1
1726	1	0	0	0	0	0	0	0	2	3
1727	0	0	0	0	0	0	0	0	3	1
1728	0	0	0	0	0	0	0	0	3	3
1729	1	0	0	0	0	0	0	0	5	2
1730	1	0	0	0	0	0	0	0	4	0
1731	0	0	0	0	0	0	0	0	3	3
1732	1	0	0	0	0	0	0	0	2	2
1733	0	0	0	0	0	0	0	0	2	3
1734	0	0	0	0	0	0	0	0	1	1
1735	0	0	0	0	0	0	0	0	3	2
1736	0	0	0	0	0	0	0	0	4	2
1737	0	0	0	0	0	0	0	0	3	3
1738	1	0	0	0	0	0	0	0	3	4
1739	0	1	0	0	0	0	1	0	3	3
1740	1	0	0	0	0	0	0	0	4	2
1741	0	0	0	0	0	0	0	0	3	2
1742	1	1	0	0	0	0	0	0	3	2
1743	1	0	0	0	0	0	0	0	3	3
1744	0	0	0	0	0	0	0	0	1	2
1745	1	0	0	0	0	0	0	0	2	3
1746	0	0	0	0	0	0	0	0	1	3
1747	1	0	0	0	0	0	0	0	2	1
1748	1	0	0	0	0	0	0	0	1	1
1749	0	0	0	0	0	0	0	0	2	1
1750	1	0	0	0	0	0	0	0	1	2
1751	1	0	0	0	0	0	0	0	2	1
1752	0	0	0	0	0	0	0	0	2	1
1753	1	0	0	0	0	0	0	0	2	2
1754	1	0	0	0	0	0	0	0	3	1
1755	0	0	0	0	0	0	0	0	1	2
1756	0	0	0	0	0	0	0	0	2	2
1757	1	0	0	0	0	0	0	0	4	3
1758	1	0	0	0	0	0	0	0	3	1
1759	1	0	0	0	0	0	0	0	1	1
1760	0	0	0	0	0	0	0	0	1	1
1761	2	0	0	0	0	0	0	0	2	1
1762	2	0	0	0	0	0	0	0	2	1
1763	0	0	0	0	0	0	0	0	4	1
1764	1	0	0	0	0	0	0	0	1	1
1765	1	0	0	0	0	0	0	0	1	3
1766	1	0	0	0	0	0	0	0	3	2
1767	1	0	0	0	0	0	0	0	4	2
1768	1	0	0	0	0	0	0	0	3	2
1769	2	0	0	0	0	0	0	0	2	2
1770	2	0	0	0	0	0	0	0	2	1
1771	1	0	0	0	0	0	0	0	3	1
1772	2	0	0	0	0	0	0	0	3	2
1773	0	0	0	0	0	0	0	0	4	1
1774	0	0	0	0	0	0	0	0	3	2
1775	1	0	0	0	0	0	0	0	3	1
1776	1	0	0	0	0	0	0	0	3	2
1777	1	0	0	0	0	0	0	0	3	2
1778	1	0	0	0	0	0	0	0	2	3
1779	0	0	0	0	0	0	0	0	3	2
1780	1	0	0	0	0	0	0	0	3	3
1781	1	0	0	0	0	0	0	0	1	3
1782	0	0	0	0	0	0	0	0	2	3
1783	1	0	0	0	0	0	0	0	2	2
1784	0	0	0	0	0	0	0	0	4	3
1785	0	0	0	0	0	0	0	0	3	3
1786	0	0	0	0	0	0	0	0	2	2
1787	1	0	0	0	0	0	0	0	3	1
1788	0	0	0	0	0	0	0	0	3	1
1789	0	0	0	0	0	0	0	0	3	1
1790	0	0	0	0	0	0	0	0	3	2
1791	0	0	0	0	0	0	0	0	3	2
1792	0	0	0	0	0	0	0	0	2	2
1793	1	0	0	0	0	0	0	0	4	0
1794	1	0	0	0	0	0	1	0	2	1
1795	1	0	0	0	0	0	0	0	2	3
1796	1	0	0	0	0	0	0	0	2	2
1797	1	0	0	0	0	0	0	0	2	1
1798	0	0	0	0	0	0	0	0	4	2
1799	1	1	0	0	0	0	0	0	2	2
1800	1	0	0	0	0	0	0	0	3	1
1801	1	0	0	0	0	0	0	0	3	3
1802	0	1	0	0	0	0	0	0	2	2
1803	0	0	0	0	0	0	0	0	1	2
1804	1	1	0	0	0	0	1	0	4	2
1805	0	1	0	0	0	0	0	0	3	2
1806	1	0	0	0	0	0	0	0	2	2
1807	0	0	0	0	0	0	0	0	4	1
1808	0	0	0	0	0	0	0	0	2	4
1809	0	0	0	0	0	0	0	0	2	1
1810	0	0	0	0	0	0	0	0	3	2
1811	0	0	0	0	0	0	0	0	2	2
1812	0	0	0	0	0	0	0	0	2	4
1813	0	0	0	0	0	0	0	0	3	2
1814	0	0	1	0	0	0	0	0	2	3
1815	0	1	0	0	0	0	0	0	4	2
1816	0	0	0	0	0	0	0	0	2	1
1817	0	0	0	0	0	0	1	0	3	1
1818	0	0	0	0	0	0	0	0	3	1
1819	0	0	0	0	0	0	0	0	4	2
1820	0	0	0	0	0	0	0	0	1	2
1821	0	0	0	0	0	0	0	0	3	2
1822	0	0	0	0	0	0	0	0	3	1
1823	0	0	0	0	0	0	0	0	1	2
1824	0	0	0	0	0	0	0	0	2	2
1825	0	0	0	0	0	0	0	0	2	2
1826	0	0	0	0	0	0	0	0	3	3
1827	0	0	0	0	0	0	0	0	2	2
1828	0	0	0	0	0	0	0	0	1	1
1829	0	0	0	0	0	0	0	0	3	2
1830	0	1	0	0	0	0	0	0	2	1
1831	0	0	0	0	0	0	0	0	3	1
1832	0	0	0	0	0	0	0	0	1	4
1833	0	0	0	0	0	0	0	0	2	2
1834	0	0	0	0	0	0	0	0	2	2
1835	0	0	0	0	0	0	0	0	1	2
1836	0	0	0	0	0	0	0	0	3	2
1837	0	0	0	0	0	0	1	0	4	2
1838	0	0	0	0	0	0	0	0	1	2
1839	0	0	0	0	0	0	0	0	2	2
1840	0	0	0	0	0	0	0	0	4	2
1841	0	0	0	0	0	0	0	0	0	2
1842	0	0	0	0	0	0	0	0	2	2
1843	0	0	0	0	0	0	0	0	4	1
1844	0	0	0	0	0	0	0	0	2	3
1845	0	0	0	0	0	0	0	0	3	2
1846	0	0	0	0	0	0	0	0	4	2
1847	0	0	0	0	0	0	0	0	1	2
1848	0	1	0	0	0	0	0	0	3	2
1849	0	1	0	0	0	0	0	0	4	2
1850	0	0	0	0	0	0	0	0	2	1
1851	1	0	0	0	0	0	0	0	1	1
1852	1	1	0	0	0	0	0	0	3	2
1853	1	1	0	0	0	0	0	0	1	2
1854	0	0	0	0	0	0	0	0	1	2
1855	0	0	0	0	0	0	0	0	1	2
1856	0	0	0	0	0	0	0	0	1	1
1857	0	0	0	0	0	0	0	0	3	1
1858	0	0	0	1	0	0	0	0	1	2
1859	0	1	0	0	0	0	0	0	1	3
1860	0	1	0	0	0	0	0	0	2	1
1861	1	0	0	1	0	0	0	0	2	2
1862	0	0	0	1	0	0	0	0	3	1
1863	0	1	0	0	0	0	0	0	1	1
1864	0	0	0	0	0	0	0	0	2	1
1865	0	0	0	0	0	0	0	0	1	2
1866	0	0	0	0	0	0	0	0	1	1
1867	0	0	0	0	0	0	0	0	3	3
1868	0	0	0	0	0	0	0	0	1	0
1869	0	0	0	0	0	0	0	0	3	2
1870	0	1	0	0	0	0	1	0	0	3
1871	0	0	0	0	0	0	0	0	3	3
1872	0	1	0	0	0	0	0	0	3	1
1873	0	0	0	0	0	0	0	0	1	1
1874	0	1	0	0	0	0	0	0	2	1
1875	0	0	0	0	0	0	0	0	2	2
1876	1	1	0	0	0	0	0	0	1	1
1877	1	0	0	0	0	0	0	0	4	1
1878	1	0	0	0	0	0	0	0	0	2
1879	1	1	0	0	0	0	0	0	3	2
1880	0	0	0	0	0	0	0	0	4	3
1881	0	0	0	0	0	0	0	0	2	2
1882	1	0	0	0	0	0	0	0	1	0
1883	1	1	0	0	0	0	0	0	4	4
1884	1	0	0	0	0	0	0	0	3	2
1885	1	1	0	0	0	0	0	0	4	4
1886	2	1	0	0	0	0	1	0	2	1
1887	0	0	0	1	0	0	0	0	5	1
1888	1	1	0	0	0	0	1	0	3	1
1889	1	0	0	0	0	0	0	0	4	3
1890	1	0	0	0	0	0	0	0	2	2
1891	1	0	0	0	0	0	0	0	3	2
1892	1	0	0	0	0	0	0	0	3	2
1893	2	1	0	0	0	0	0	0	1	1
1894	2	1	0	0	0	0	0	0	3	1
1895	2	0	0	0	0	0	0	0	2	2
1896	1	1	0	0	0	0	0	0	1	3
1897	1	0	0	0	0	0	0	0	1	3
1898	1	0	0	0	0	0	0	0	0	3
1899	1	1	0	0	0	0	0	0	3	3
1900	0	1	0	0	0	0	1	0	1	1
1901	0	0	0	0	0	0	0	0	3	1
1902	1	0	0	0	0	0	0	0	2	2
1903	1	1	0	0	0	0	0	0	1	2
1904	1	1	0	0	0	0	0	0	2	1
1905	0	0	0	0	0	0	0	0	3	1
1906	0	0	0	0	0	0	0	0	1	1
1907	0	0	0	0	0	0	0	0	2	1
1908	1	0	0	0	0	0	0	0	1	3
1909	1	0	0	0	0	0	0	0	3	1
1910	0	0	0	0	0	0	0	0	2	2
1911	1	0	0	0	0	0	0	0	3	1
1912	0	0	0	0	0	0	0	0	3	3
1913	1	0	0	0	0	0	1	0	2	1
1914	0	0	0	0	0	0	0	0	3	2
1915	0	1	0	0	0	0	0	0	2	2
1916	0	0	0	0	0	0	0	0	2	0
1917	0	0	0	0	0	0	0	0	2	2
1918	0	0	0	0	0	0	0	0	2	2
1919	0	0	0	0	0	0	0	0	2	2
1920	0	0	0	0	0	0	0	0	1	1
1921	0	0	0	0	0	0	0	0	2	3
1922	0	0	0	0	0	0	0	0	3	1
1923	0	0	0	0	0	0	0	0	2	2
1924	0	0	0	0	0	0	1	0	3	2
1925	0	0	0	0	0	0	0	0	4	1
1926	0	0	0	0	0	0	0	0	3	0
1927	0	0	0	0	0	0	0	0	3	0
1928	0	0	0	0	0	0	1	0	2	1
1929	1	0	0	0	0	0	0	0	3	1
1930	1	0	0	0	0	0	0	0	3	2
1931	1	0	0	0	0	0	0	0	1	2
1932	0	0	0	0	0	0	0	0	2	2
1933	1	0	0	0	0	0	0	0	2	2
1934	1	0	0	0	0	0	0	0	2	3
1935	2	0	0	0	0	0	0	0	1	1
1936	2	0	0	0	0	0	0	0	1	3
1937	1	0	0	0	0	0	0	0	2	1
1938	1	0	1	0	0	0	0	0	1	1
1939	0	0	0	0	0	0	0	0	3	2
1940	1	0	0	0	0	0	0	0	1	3
1941	1	1	0	0	0	0	0	0	2	2
1942	1	1	0	0	0	0	0	0	0	1
1943	2	1	0	0	0	0	0	0	2	3
1944	2	0	0	0	0	0	0	0	1	0
1945	2	0	0	0	0	0	0	0	1	2
1946	1	0	0	0	0	0	0	0	1	3
1947	1	0	0	0	0	0	0	0	3	3
1948	1	0	0	0	0	0	0	0	1	0
1949	1	0	0	0	0	0	0	0	2	2
1950	1	0	0	0	0	0	0	0	4	2
1951	1	0	0	0	0	0	0	0	2	4
1952	1	0	0	0	0	0	0	0	1	3
1953	1	0	0	0	0	0	0	0	2	3
1954	1	0	0	0	0	0	0	0	1	2
1955	1	0	0	0	0	0	0	0	4	2
1956	1	0	0	0	0	0	0	0	3	1
1957	2	0	0	0	0	0	1	0	1	2
1958	2	0	0	0	0	0	0	0	4	4
1959	1	0	0	0	0	0	0	0	3	1
1960	0	0	0	0	0	0	0	0	1	3
1961	1	0	1	0	0	0	0	0	1	1
1962	2	0	0	0	0	0	0	1	1	2
1963	2	0	0	0	0	0	1	1	5	2
1964	2	0	0	0	0	0	0	0	3	2
1965	2	0	0	0	0	0	0	0	1	1
1966	1	0	0	1	0	0	0	0	2	2
1967	1	0	0	0	0	0	0	0	3	1
1968	1	0	0	0	0	0	0	0	2	1
1969	1	0	0	0	0	0	0	0	3	0
1970	1	0	0	0	0	0	0	0	2	1
1971	1	0	0	0	0	0	0	0	1	1
1972	0	0	0	0	0	0	0	1	2	1
1973	0	0	0	1	0	0	0	0	2	0
1974	0	0	0	1	0	0	0	1	4	2
1975	1	0	0	1	0	0	0	1	2	3
1976	1	0	0	0	0	0	0	0	2	2
1977	1	0	0	0	0	0	0	0	2	2
1978	2	0	0	0	0	0	0	0	0	2
1979	1	0	0	0	0	0	0	0	2	2
1980	2	0	0	0	0	0	0	0	2	2
1981	1	0	0	0	0	0	0	0	4	2
1982	0	0	0	0	0	0	0	0	2	1
1983	2	0	0	0	0	0	0	0	1	3
1984	1	0	0	0	0	0	0	0	2	2
1985	2	0	0	0	0	0	0	0	3	1
1986	1	0	0	1	0	0	0	0	2	4
1987	1	0	0	0	0	0	0	0	1	1
1988	1	0	0	0	0	0	0	0	3	2
1989	2	0	0	0	0	0	0	0	2	3
1990	1	0	0	1	0	0	0	0	2	2
1991	2	0	0	0	0	0	0	0	2	0
1992	1	0	0	1	0	0	0	0	4	2
1993	2	0	0	0	0	0	0	0	1	3
1994	2	0	0	0	0	0	0	0	1	2
1995	1	0	0	0	0	0	0	0	3	3
1996	1	0	0	0	0	0	0	0	2	2
1997	2	0	0	0	0	0	0	0	3	2
1998	1	0	0	0	0	0	0	0	3	3
[truncated: 504 more rows]

## Sheet: H-bonds_set_C
Frames	Candesartan_Hbonds_ARG1	Candesartan_Hbonds_ARG2	Codeine_Hbonds_ARG1	Codeine_Hbonds_ARG2	Irbesartan_Hbonds_ARG1	Irbesartan_Hbonds_ARG2	Isavuconazole_Hbonds_ARG1	Isavuconazole_Hbonds_ARG2	Metformin_Hbonds_ARG1	Metformin_Hbonds_ARG2
0	1	0	0	1	2	1	1	0	1	3
1	0	2	1	2	0	0	0	0	3	2
2	1	0	0	2	1	0	1	0	2	2
3	1	1	0	2	1	0	0	0	3	1
4	0	0	0	1	1	0	0	0	1	2
5	1	2	0	1	1	0	1	0	2	0
6	0	0	0	1	2	0	0	0	1	1
7	1	0	0	2	0	1	0	0	3	0
8	1	1	0	2	1	0	1	0	1	2
9	1	2	0	0	0	1	1	0	1	3
10	1	0	1	2	0	0	1	0	2	1
11	2	1	0	2	0	0	1	0	0	1
12	1	2	0	1	1	0	1	1	1	1
13	1	1	0	1	1	0	0	0	1	0
14	0	0	0	2	0	3	0	0	1	2
15	1	0	0	2	0	0	1	0	1	3
16	1	0	0	1	0	0	1	0	3	2
17	1	0	0	1	0	0	1	0	3	2
18	1	1	0	1	0	0	0	0	1	1
19	1	1	0	2	1	0	1	0	3	2
20	1	0	0	1	1	0	0	0	3	2
21	1	0	0	1	0	1	0	0	1	2
22	0	0	0	0	0	0	0	0	3	3
23	1	2	0	2	0	1	0	0	2	4
24	1	1	0	2	0	0	0	0	1	1
25	1	0	0	1	0	1	0	0	2	1
26	1	1	0	1	0	0	0	0	0	4
27	1	1	0	1	1	0	0	0	0	3
28	2	0	0	1	0	0	0	0	2	3
29	0	0	0	0	0	0	0	0	2	2
30	2	1	0	0	1	0	0	0	2	3
31	1	1	0	0	1	0	0	0	3	3
32	1	0	0	0	0	0	0	0	3	1
33	1	2	0	0	0	0	0	1	1	2
34	2	1	0	0	0	0	0	1	1	2
35	0	1	1	0	0	0	1	0	1	3
36	0	0	0	1	0	0	0	0	2	2
37	0	0	0	1	0	0	1	0	2	1
38	1	1	1	1	1	0	0	0	2	2
39	0	1	0	0	1	0	0	0	2	1
40	0	1	0	2	0	0	0	0	2	2
41	2	0	0	2	0	0	0	0	2	1
42	1	0	0	1	0	0	0	0	2	4
43	1	0	1	0	0	0	0	0	3	3
44	0	0	0	1	0	0	0	0	1	2
45	1	1	0	0	0	0	0	0	1	5
46	1	0	0	1	1	0	0	0	1	2
47	1	1	0	0	0	0	0	0	3	2
48	1	0	0	1	0	0	0	0	2	2
49	1	0	0	0	1	0	0	0	0	1
50	1	1	0	1	0	0	0	0	2	2
51	1	1	0	1	1	0	0	0	2	0
52	1	2	0	1	1	0	0	0	2	3
53	1	0	0	0	1	0	0	0	3	1
54	0	1	0	1	0	0	0	0	2	2
55	0	1	0	0	0	0	0	0	1	3
56	1	0	0	1	1	0	0	0	4	1
57	0	0	0	1	0	0	0	0	3	2
58	1	0	0	0	0	0	0	0	3	2
59	0	0	0	1	0	0	0	0	4	2
60	1	0	0	1	1	0	0	0	2	1
61	1	0	0	1	1	0	0	0	3	1
62	1	1	0	1	1	0	0	0	3	1
63	1	1	0	0	1	0	1	0	0	3
64	1	0	0	0	0	0	0	0	2	2
65	1	0	0	1	1	0	0	0	4	3
66	0	1	0	0	0	0	0	0	2	1
67	1	0	0	0	0	0	0	0	1	3
68	1	0	0	0	1	0	0	0	1	2
69	2	1	0	0	0	0	0	0	2	1
70	0	1	0	0	1	0	0	0	1	1
71	0	0	0	0	1	0	0	0	2	2
72	1	1	0	0	0	0	0	0	3	2
73	1	0	0	0	0	0	0	0	3	1
74	0	0	0	0	1	0	0	0	2	2
75	0	1	0	0	1	0	0	0	3	3
76	1	0	0	0	0	0	0	0	1	1
77	1	2	0	0	1	0	0	0	0	2
78	0	0	0	0	0	0	0	0	2	2
79	1	0	0	0	0	0	0	0	3	2
80	0	0	0	0	1	0	0	0	2	2
81	1	0	0	0	0	0	0	0	3	1
82	1	1	0	0	1	0	0	0	3	1
83	1	0	0	0	0	0	0	0	3	2
84	1	1	0	0	0	0	0	0	1	2
85	0	0	0	0	0	0	0	0	3	4
86	0	0	0	0	0	0	0	0	3	2
87	1	0	0	0	0	0	0	0	1	2
88	1	0	0	0	2	0	0	0	0	1
89	0	0	0	0	1	0	0	0	2	2
90	0	1	0	0	0	0	0	0	1	2
91	1	0	0	0	0	0	0	0	3	0
92	1	0	0	0	0	0	0	0	2	1
93	1	0	0	0	0	0	0	0	3	0
94	1	0	0	0	0	0	0	0	1	0
95	1	1	0	0	0	0	0	0	1	1
96	0	0	0	0	1	0	0	0	3	2
97	0	0	0	0	1	0	0	0	1	2
98	0	0	0	0	0	0	0	0	1	3
99	0	1	0	0	0	0	0	0	0	3
100	0	1	1	0	0	0	0	0	3	1
101	0	2	0	0	0	0	0	0	4	3
102	0	1	0	0	0	0	0	0	3	0
103	0	1	0	0	0	0	1	0	1	1
104	0	0	0	0	0	0	0	0	2	2
105	0	0	0	0	0	0	1	0	1	2
106	0	0	0	0	1	0	1	0	1	2
107	0	0	0	0	1	0	0	0	1	2
108	0	0	0	0	0	0	0	0	2	2
109	0	1	0	0	1	0	0	0	2	1
110	0	0	0	0	1	0	0	0	3	2
111	0	1	0	0	1	0	0	0	3	3
112	0	0	0	0	0	0	1	0	2	3
113	0	2	0	0	0	0	0	0	1	2
114	0	0	0	0	0	0	0	0	1	2
115	0	0	0	0	0	0	0	0	3	1
116	0	0	0	0	0	0	0	0	1	3
117	0	1	0	0	1	0	0	0	0	3
118	0	0	0	0	1	0	0	0	3	2
119	0	1	0	0	1	0	0	0	3	1
120	1	0	0	0	0	0	0	0	2	2
121	0	1	0	1	0	0	0	0	2	3
122	0	0	0	0	0	0	0	0	2	1
123	0	0	0	0	0	0	0	0	0	2
124	0	0	0	0	0	0	0	0	0	4
125	0	2	0	1	0	0	0	0	2	1
126	0	1	0	0	0	0	0	0	1	1
127	0	0	0	0	0	0	0	0	2	4
128	0	0	0	0	0	0	0	0	2	3
129	0	1	0	0	0	0	0	0	2	3
130	0	0	0	0	0	0	0	0	1	0
131	0	1	0	0	0	0	0	0	1	4
132	0	1	0	0	0	0	0	0	2	2
133	0	1	0	0	0	0	0	0	3	4
134	1	0	0	0	0	0	0	0	4	1
135	0	1	0	0	0	0	0	0	4	3
136	0	1	0	0	0	0	0	0	1	3
137	0	1	0	0	0	0	0	1	2	2
138	0	1	0	0	0	0	0	0	2	3
139	0	0	0	0	0	0	0	0	3	3
140	1	1	0	0	0	0	0	0	2	0
141	0	0	0	0	0	0	0	0	1	1
142	0	1	0	0	1	0	0	0	2	1
143	0	1	0	0	0	0	0	0	1	2
144	0	1	0	0	0	0	0	0	4	1
145	0	1	0	0	0	0	0	0	2	1
146	0	1	0	0	0	0	0	0	3	1
147	0	0	0	0	0	0	0	0	2	2
148	0	0	0	0	0	0	0	0	1	2
149	0	1	0	0	0	0	0	0	2	1
150	0	0	0	0	0	0	0	0	4	1
151	0	1	0	0	0	0	1	0	3	2
152	0	2	0	0	0	0	0	0	1	2
153	0	0	0	0	0	0	0	0	1	1
154	0	0	0	0	0	0	0	0	3	2
155	0	0	0	0	0	0	1	0	2	2
156	0	1	0	0	0	0	0	0	0	2
157	0	1	0	0	0	0	0	0	2	2
158	0	0	0	0	0	0	0	0	2	1
159	0	0	0	0	0	0	0	0	2	3
160	0	0	0	0	0	0	0	0	0	2
161	0	1	0	0	0	0	0	0	3	2
162	1	1	0	0	0	0	0	0	2	2
163	0	0	0	0	0	0	0	0	1	1
164	0	0	0	0	0	0	1	0	3	0
165	0	0	0	0	0	0	0	0	2	3
166	0	0	0	0	0	0	0	0	3	2
167	0	0	0	0	0	0	0	0	2	1
168	0	0	0	0	0	0	0	0	2	2
169	0	1	0	0	0	0	0	0	1	1
170	1	0	0	0	0	0	0	0	3	1
171	0	0	0	0	0	0	0	0	1	2
172	0	0	0	0	0	0	0	0	2	2
173	0	0	0	0	0	0	0	0	2	1
174	0	1	0	0	0	0	0	0	1	1
175	0	1	0	0	0	0	0	0	1	2
176	0	0	0	0	0	0	0	0	1	0
177	0	1	0	0	0	0	0	0	2	1
178	0	1	0	0	0	0	0	0	1	0
179	0	1	0	0	0	0	0	0	1	1
180	0	0	0	0	0	0	0	0	0	2
181	0	0	0	0	0	0	0	0	2	4
182	0	1	0	0	0	0	0	0	2	2
183	0	1	0	0	0	0	0	0	2	1
184	0	1	0	0	0	0	0	0	2	2
185	0	0	0	0	0	0	0	0	1	2
186	0	0	0	0	0	0	0	0	2	1
187	0	1	0	0	0	0	1	0	2	2
188	0	0	0	0	0	0	0	0	1	2
189	1	0	0	1	0	0	0	0	1	2
190	0	0	1	0	0	0	0	0	1	2
191	0	0	0	0	0	0	0	0	1	1
192	0	1	0	0	0	0	0	0	4	2
193	0	1	1	0	0	0	0	0	2	0
194	0	0	1	0	0	0	0	0	2	2
195	0	2	0	0	0	0	0	0	1	2
196	0	0	0	0	0	0	0	0	3	2
197	0	1	0	0	0	0	0	0	3	1
198	0	1	0	0	0	0	0	0	3	1
199	0	0	0	0	0	0	1	0	2	1
200	1	0	0	0	0	0	0	0	2	2
201	1	0	0	0	0	0	0	0	2	3
202	1	0	0	0	0	0	0	0	1	0
203	1	1	0	0	0	0	0	0	2	1
204	0	1	0	0	0	0	0	0	2	2
205	1	0	0	0	0	0	0	0	1	1
206	1	1	0	0	0	0	0	0	1	1
207	1	0	0	0	0	0	0	0	2	1
208	0	1	0	0	0	0	1	0	3	1
209	1	1	0	0	0	0	0	0	0	1
210	1	1	0	0	0	0	0	0	4	2
211	0	0	0	0	0	0	0	0	1	2
212	0	1	0	0	0	0	0	0	2	2
213	0	0	0	0	0	0	0	0	2	3
214	0	0	0	0	0	0	0	0	4	1
215	0	1	0	0	0	0	0	0	2	2
216	1	1	0	0	0	0	0	0	1	3
217	0	0	0	0	0	0	0	0	2	2
218	1	0	0	0	0	0	0	0	3	1
219	1	1	0	0	0	0	0	0	0	2
220	1	1	0	0	0	0	0	0	2	1
221	1	0	0	0	0	0	0	0	3	1
222	0	1	0	0	0	0	0	0	2	0
223	1	1	0	0	0	0	1	0	1	4
224	1	1	0	0	0	0	0	0	2	1
225	1	0	0	0	0	0	0	0	0	2
226	0	0	0	0	0	0	0	0	0	3
227	1	1	0	0	0	0	0	0	1	3
228	1	1	0	0	0	0	0	0	1	2
229	0	1	0	0	0	0	0	0	2	2
230	1	1	0	0	0	0	0	0	3	3
231	1	0	0	0	0	0	0	0	2	3
232	0	1	0	0	0	0	0	0	1	1
233	0	0	0	0	0	0	0	0	2	2
234	1	1	0	0	0	0	0	0	2	2
235	0	1	0	0	0	0	1	0	1	1
236	0	1	0	0	0	0	0	0	0	3
237	1	1	0	0	0	0	1	0	2	1
238	1	1	0	0	0	0	0	0	3	3
239	1	0	0	0	0	0	1	0	2	3
240	1	1	0	0	0	0	0	0	1	2
241	1	1	0	0	0	0	1	0	1	3
242	0	1	0	0	0	0	0	0	0	1
243	1	1	0	0	0	0	0	0	2	2
244	1	0	0	0	0	0	0	0	2	1
245	0	0	0	0	0	0	0	0	2	2
246	0	0	0	0	0	0	0	0	1	3
247	1	0	0	0	0	0	1	0	2	1
248	1	0	0	0	0	0	0	0	1	2
249	1	0	0	0	0	0	0	0	3	3
250	1	1	0	0	0	0	0	0	2	2
251	0	1	0	0	0	0	0	0	2	2
252	0	1	0	0	0	0	0	0	2	2
253	0	0	0	0	0	0	0	0	2	1
254	0	1	0	0	0	0	0	0	2	3
255	0	0	0	0	0	0	0	0	3	1
256	0	1	0	0	0	0	0	0	1	2
257	0	0	0	0	0	0	0	0	3	1
258	0	1	0	0	0	0	0	0	0	1
259	0	0	0	0	0	0	0	0	2	1
260	0	0	0	0	0	0	0	0	2	2
261	1	0	0	0	0	0	1	0	1	1
262	0	0	0	0	0	0	0	0	2	2
263	0	0	0	0	0	0	0	0	2	3
264	0	0	0	0	0	0	0	0	3	2
265	0	0	0	0	0	0	0	0	1	2
266	1	0	0	0	0	0	0	0	0	2
267	0	0	0	0	0	0	0	0	1	1
268	0	0	0	0	0	0	0	0	2	1
269	0	0	0	0	0	0	0	0	0	3
270	0	0	1	0	0	0	0	0	2	2
271	0	1	0	0	0	0	0	0	1	2
272	1	0	0	0	0	0	0	0	1	1
273	0	0	0	0	0	0	0	0	3	2
274	0	0	0	0	0	0	0	0	3	2
275	0	0	0	0	0	0	0	0	2	1
276	0	1	0	0	0	0	0	0	2	1
277	0	0	0	0	0	0	0	0	1	1
278	0	2	0	0	0	0	0	0	1	2
279	0	0	0	0	0	0	0	0	0	1
280	0	0	0	0	0	0	0	0	2	1
281	0	1	0	0	0	0	0	0	0	2
282	0	2	0	0	0	0	0	0	2	2
283	0	0	0	0	0	0	0	0	3	2
284	0	1	0	0	0	0	0	0	2	1
285	0	0	0	0	0	0	1	0	3	3
286	0	0	0	0	0	0	0	0	0	2
287	0	0	0	1	0	0	0	0	3	3
288	1	2	0	0	0	0	0	0	2	1
289	0	0	0	0	0	0	0	0	2	2
290	0	0	0	1	0	0	0	0	3	2
291	0	0	0	0	0	0	1	0	3	2
292	0	0	0	0	0	0	0	0	0	2
293	0	0	0	0	0	0	0	0	3	1
294	0	1	0	0	0	0	1	0	1	2
295	0	0	0	0	0	0	0	0	1	3
296	1	2	0	0	0	0	0	0	2	1
297	0	1	0	0	0	0	1	0	1	2
298	0	0	0	1	0	0	0	0	1	2
299	0	2	0	0	0	0	0	0	2	2
300	0	0	0	0	0	0	0	0	2	1
301	0	2	0	0	0	0	0	0	2	1
302	0	0	0	0	0	0	0	0	3	2
303	0	0	1	0	0	0	0	0	2	1
304	0	0	0	0	0	0	0	0	3	0
305	0	1	0	0	0	0	0	0	1	2
306	0	1	0	0	0	0	0	0	0	3
307	0	1	0	0	0	0	0	0	2	2
308	0	1	0	0	0	0	0	0	2	1
309	1	0	0	0	0	0	0	0	1	2
310	0	1	0	0	0	0	0	0	1	2
311	0	0	0	0	0	0	0	0	1	2
312	0	0	0	0	0	0	0	0	1	2
313	0	1	0	0	0	0	0	0	1	1
314	0	0	0	0	0	0	0	0	1	3
315	0	1	0	0	0	0	0	0	2	2
316	0	0	0	0	0	0	0	0	5	1
317	0	0	0	0	0	0	0	0	0	1
318	0	1	0	0	0	0	0	0	2	1
319	0	0	0	0	0	0	0	0	3	2
320	0	0	0	0	0	0	0	0	1	1
321	0	0	0	0	0	0	0	0	2	2
322	0	1	0	0	0	0	0	0	3	3
323	0	1	0	0	0	0	0	0	1	3
324	0	0	0	0	0	0	0	0	1	2
325	0	0	0	0	0	0	0	0	3	2
326	0	0	0	0	0	0	0	0	1	2
327	0	0	0	0	0	0	0	0	0	2
328	0	0	0	0	0	0	0	0	1	0
329	0	0	0	0	0	0	0	0	1	3
330	0	0	0	0	0	0	0	0	2	1
331	0	0	0	0	0	0	0	0	0	2
332	0	1	1	0	0	0	0	0	1	4
333	0	0	0	0	0	0	0	0	2	3
334	0	0	0	0	0	0	0	0	2	2
335	0	0	0	0	0	0	0	0	3	2
336	0	0	0	0	0	0	0	0	3	1
337	0	0	0	0	0	0	0	0	4	1
338	0	0	1	0	0	0	1	0	2	2
339	0	1	1	0	0	0	0	0	1	2
340	0	0	1	0	0	0	0	0	2	3
341	0	0	1	0	0	0	0	0	2	2
342	0	1	0	0	0	0	1	0	2	3
343	0	0	1	0	0	0	0	0	4	4
344	0	1	0	0	0	0	1	0	1	3
345	0	0	0	0	0	0	0	0	1	2
346	0	0	1	0	0	0	0	0	2	1
347	1	0	0	0	0	0	0	0	3	2
348	0	0	0	0	0	0	0	0	2	1
349	0	0	1	0	0	0	0	0	1	4
350	1	0	1	0	0	0	0	0	0	2
351	0	0	1	0	0	0	0	0	1	3
352	0	0	1	0	0	0	1	0	3	1
353	0	0	1	0	0	0	0	0	1	2
354	0	0	1	0	0	0	0	0	1	2
355	1	1	1	0	0	0	0	0	2	2
356	1	1	0	0	0	0	0	0	2	3
357	0	0	1	0	0	0	0	0	2	2
358	0	0	0	0	0	0	0	0	1	3
359	0	0	1	0	0	0	1	0	1	3
360	1	1	1	0	0	0	0	0	1	1
361	0	0	1	0	0	0	0	0	1	2
362	1	0	1	0	0	0	0	0	1	3
363	0	1	0	0	0	0	0	0	3	3
364	1	1	1	0	0	0	0	0	2	1
365	1	2	1	0	0	0	0	0	0	0
366	1	1	1	0	0	0	0	0	1	1
367	0	0	1	0	0	0	0	0	1	0
368	0	0	1	0	0	0	0	0	0	4
369	2	1	1	0	0	0	1	0	1	3
370	0	0	1	0	0	0	0	0	1	3
371	0	1	1	0	0	0	0	0	3	2
372	1	0	1	0	0	0	0	0	2	3
373	1	0	1	0	0	0	0	0	1	2
374	0	0	1	0	0	0	0	0	1	2
375	0	2	1	0	0	0	0	0	3	2
376	0	0	1	0	0	0	0	0	1	2
377	0	0	0	0	0	0	0	0	1	2
378	0	1	1	0	0	0	1	0	1	2
379	0	0	0	0	0	0	0	0	2	2
380	0	1	1	0	0	0	0	0	0	3
381	1	0	1	0	0	0	0	0	0	3
382	0	0	0	0	0	0	0	0	1	3
383	0	0	1	0	0	0	0	0	2	3
384	0	0	1	0	0	0	0	0	3	1
385	0	0	1	0	0	0	0	0	1	3
386	0	1	0	0	0	0	1	0	2	2
387	0	1	0	0	0	0	0	0	3	1
388	0	1	0	0	0	0	0	0	2	3
389	0	1	1	0	0	0	0	0	1	2
390	0	0	0	0	0	0	0	0	2	1
391	1	1	0	0	0	0	0	0	0	4
392	0	0	0	0	0	0	0	0	2	2
393	0	0	1	0	0	0	0	0	1	2
394	0	0	0	0	0	0	0	0	2	2
395	0	0	0	0	0	0	0	0	1	1
396	0	0	1	0	0	0	0	0	2	3
397	0	1	1	0	0	0	1	0	4	2
398	0	0	1	0	0	0	0	0	3	2
399	0	0	0	1	0	0	1	0	2	1
400	1	0	1	0	0	0	1	0	1	2
401	0	0	0	0	0	0	0	0	1	2
402	0	0	1	0	0	0	1	0	3	3
403	0	0	1	0	0	0	0	0	0	1
404	0	1	1	0	0	0	0	0	1	4
405	0	1	1	0	0	0	0	0	1	3
406	0	1	1	1	0	0	0	0	2	0
407	0	0	0	0	0	0	1	0	3	2
408	0	0	1	0	0	0	0	0	0	2
409	0	0	1	1	0	0	0	0	3	3
410	0	0	1	0	0	0	0	0	1	3
411	1	0	0	1	0	0	0	0	2	0
412	1	1	0	0	0	0	0	0	4	3
413	0	1	1	0	0	0	0	0	2	2
414	0	1	0	0	0	0	0	0	3	2
415	0	0	1	0	0	0	1	0	1	1
416	0	0	1	1	0	0	0	0	2	1
417	0	0	1	0	0	0	1	0	3	2
418	1	0	1	1	0	0	1	0	0	2
419	0	0	1	0	0	0	0	0	1	2
420	1	0	0	1	0	0	0	0	3	1
421	0	0	0	1	0	0	0	0	0	1
422	0	1	0	1	0	0	1	0	3	2
423	0	0	0	0	0	0	1	0	1	1
424	0	0	0	0	0	0	1	0	2	1
425	0	0	1	0	0	0	0	0	1	2
426	0	1	1	0	0	0	0	0	1	0
427	1	0	1	0	0	0	0	0	1	1
428	1	0	0	1	0	0	0	0	2	2
429	0	0	0	0	0	0	0	0	2	3
430	0	1	0	0	0	0	0	0	1	2
431	0	1	1	0	0	0	1	0	2	3
432	1	0	0	0	0	0	0	0	2	3
433	0	1	1	0	0	0	0	0	1	1
434	0	1	0	0	0	0	0	0	1	2
435	0	0	0	0	0	0	0	0	0	4
436	1	0	0	0	0	1	0	0	3	2
437	1	1	1	0	0	0	0	0	1	2
438	1	0	0	0	0	0	0	0	3	3
439	0	0	0	0	0	0	0	0	2	3
440	0	1	0	0	0	0	1	0	0	2
441	0	0	0	0	0	0	0	0	3	1
442	1	0	1	1	0	0	0	0	2	1
443	1	0	0	0	0	0	0	0	1	2
444	1	0	0	0	0	0	0	0	0	2
445	0	0	0	0	0	0	0	0	0	2
446	1	0	0	0	0	0	2	0	3	1
447	1	0	1	0	0	0	0	0	3	2
448	1	1	1	0	0	0	0	0	0	2
449	0	1	1	0	0	0	0	0	0	3
450	1	0	0	0	0	0	1	0	2	1
451	1	1	1	0	0	0	0	0	4	2
452	0	0	1	0	0	0	0	0	1	2
453	0	0	1	0	0	0	0	0	2	2
454	1	0	1	0	0	0	0	0	2	3
455	1	0	0	0	0	0	0	1	1	1
456	1	0	1	0	0	0	0	0	1	2
457	1	0	1	0	0	0	0	0	2	2
458	0	0	1	0	0	0	0	0	2	3
459	1	0	1	0	0	0	0	0	1	1
460	0	0	1	0	0	0	0	0	0	2
461	1	1	0	0	0	0	0	0	3	1
462	0	0	0	0	0	0	0	0	0	2
463	1	1	0	0	0	0	0	0	3	2
464	1	1	1	0	0	0	1	0	2	1
465	1	0	0	0	0	0	0	0	1	3
466	1	1	1	0	0	0	0	0	1	2
467	1	0	1	0	0	0	0	0	2	3
468	0	2	1	0	0	0	0	0	1	2
469	0	1	1	0	0	0	0	0	2	3
470	0	1	1	0	0	0	0	0	1	2
471	0	2	0	0	0	0	0	0	1	0
472	1	0	1	0	0	0	0	0	2	3
473	1	0	1	0	0	0	0	0	2	2
474	1	0	1	0	0	0	1	0	2	1
475	1	0	1	0	0	0	0	0	0	3
476	1	0	0	0	0	0	0	0	1	3
477	1	0	0	0	0	0	0	0	3	2
478	1	0	0	0	0	0	0	0	1	2
479	1	0	1	0	0	0	0	1	0	2
480	0	1	0	0	0	0	1	0	1	2
481	1	1	0	0	0	0	0	0	3	2
482	0	0	1	0	0	0	0	0	2	1
483	0	0	0	0	0	0	0	0	2	0
484	0	0	1	0	0	0	0	0	0	1
485	1	0	1	0	0	0	0	0	1	3
486	1	1	1	0	0	0	0	0	1	2
487	0	0	1	0	0	0	0	0	1	4
488	0	1	1	0	0	0	0	0	1	1
489	1	1	0	0	0	0	0	0	3	3
490	0	1	1	0	0	0	0	0	1	1
491	1	1	1	0	0	0	1	0	1	3
492	0	0	1	0	0	0	0	0	2	3
493	1	1	0	0	0	0	1	0	2	3
494	0	0	1	0	0	0	0	0	0	1
495	1	1	1	0	0	0	2	0	1	4
496	0	2	1	0	0	0	0	0	0	1
497	0	0	1	0	0	0	0	0	2	3
498	1	1	1	0	0	0	0	0	3	2
499	1	0	1	0	0	0	1	0	2	1
500	1	0	0	0	0	0	1	0	2	2
501	1	0	1	0	0	0	0	0	2	4
502	1	1	1	0	0	0	0	0	0	2
503	1	1	1	0	0	0	0	0	3	3
504	0	1	0	0	0	0	0	0	1	3
505	0	0	1	0	0	0	0	0	3	2
506	0	0	1	0	0	0	0	0	3	3
507	1	0	0	0	0	0	0	0	2	3
508	1	0	0	0	0	0	0	0	2	4
509	1	0	0	0	0	0	0	0	3	2
510	0	1	1	1	0	0	1	0	2	2
511	0	0	1	0	0	0	1	0	2	2
512	1	0	0	0	0	0	0	0	2	1
513	0	0	0	0	0	0	0	0	2	2
514	0	0	1	0	0	0	1	0	1	2
515	0	0	1	0	0	0	0	0	2	3
516	1	0	0	0	0	0	0	0	2	2
517	1	0	1	0	0	0	0	0	2	3
518	1	1	1	0	0	0	0	0	2	1
519	1	0	0	0	0	0	0	0	2	2
520	2	0	1	0	1	0	0	0	3	2
521	1	1	0	0	1	0	0	0	1	3
522	0	1	0	0	0	0	0	0	2	4
523	0	0	0	0	0	0	0	0	2	2
524	1	1	0	0	1	0	0	0	1	4
525	1	2	0	0	0	0	0	0	0	1
526	0	0	0	0	1	0	0	0	5	3
527	0	0	0	0	0	0	0	0	2	1
528	0	0	0	0	0	0	0	0	2	2
529	1	0	0	0	0	0	1	0	2	3
530	0	0	0	0	1	0	0	0	1	1
531	1	2	0	0	0	0	0	0	2	3
532	0	0	0	0	0	0	0	0	4	3
533	0	1	0	0	0	0	0	0	0	2
534	0	0	0	0	0	0	0	0	1	3
535	0	0	0	0	0	0	0	0	3	2
536	1	0	0	0	1	0	1	0	2	1
537	1	0	0	0	1	0	0	0	3	2
538	0	0	0	0	0	0	0	0	0	1
539	0	0	0	0	0	0	0	0	3	1
540	0	0	0	0	1	0	0	0	1	2
541	0	0	0	0	0	0	0	0	3	3
542	1	1	0	0	0	0	0	0	1	0
543	1	0	0	0	1	0	0	0	1	2
544	1	0	0	0	1	0	0	0	2	1
545	1	0	0	0	0	0	0	0	0	3
546	0	1	0	0	0	0	0	0	3	1
547	1	0	0	0	0	0	0	0	1	1
548	1	0	0	0	0	0	0	0	2	1
549	1	0	0	0	0	0	1	0	2	2
550	0	0	0	0	0	0	0	0	2	4
551	1	0	0	0	0	0	0	0	1	2
552	0	1	0	0	0	0	0	0	2	2
553	1	0	0	0	0	0	0	0	1	0
554	1	1	0	0	0	0	1	0	1	1
555	1	0	0	0	0	0	0	0	2	2
556	2	0	0	0	0	0	0	0	3	2
557	0	0	0	0	0	0	0	0	3	1
558	0	0	0	0	0	0	0	0	1	1
559	1	0	0	0	0	0	0	0	1	2
560	0	0	0	0	0	0	0	0	1	2
561	1	1	0	0	0	0	0	0	2	1
562	0	0	0	0	0	0	0	0	2	3
563	1	0	0	0	0	0	0	0	4	2
564	1	0	0	0	0	0	0	0	3	1
565	0	0	0	0	0	0	1	0	2	1
566	1	0	0	0	0	0	1	0	2	2
567	0	1	0	0	0	0	0	0	1	2
568	0	1	0	0	0	0	0	0	2	1
569	0	1	0	0	0	0	0	0	1	3
570	0	0	0	0	0	0	1	0	2	2
571	0	0	0	0	0	0	0	0	3	1
572	0	0	0	0	0	0	1	0	1	1
573	0	0	0	0	0	0	0	0	4	0
574	0	0	0	0	0	0	0	0	1	0
575	1	0	0	0	0	0	0	0	4	0
576	0	0	0	0	0	0	0	0	2	2
577	0	0	0	0	0	0	0	0	2	1
578	0	0	0	0	0	0	0	0	4	3
579	0	0	0	0	0	0	1	0	1	0
580	1	0	0	0	0	0	0	0	3	2
581	1	0	0	0	0	0	1	0	1	3
582	1	0	0	1	0	0	1	0	3	2
583	0	0	0	0	0	0	0	0	3	3
584	0	0	0	0	0	0	0	0	2	2
585	1	0	0	0	0	0	1	0	1	1
586	0	0	0	0	0	0	0	0	3	2
587	1	0	0	0	0	0	0	0	2	2
588	1	0	0	0	0	0	0	0	3	2
589	0	0	0	0	0	0	0	0	2	1
590	0	0	0	0	0	0	0	0	3	2
591	0	0	0	0	0	0	0	0	0	1
592	0	0	0	0	0	0	0	0	1	1
593	1	0	0	0	0	0	0	0	1	1
594	0	0	0	0	0	0	0	0	1	1
595	0	2	0	0	0	0	0	0	2	1
596	1	2	0	0	0	0	0	0	2	1
597	1	0	0	0	0	0	0	0	2	2
598	0	0	0	0	0	0	0	0	0	4
599	0	0	0	0	0	0	0	0	2	1
600	1	0	0	0	0	0	0	0	1	1
601	0	0	0	1	0	0	0	0	2	2
602	0	1	0	1	0	0	0	0	2	2
603	1	1	0	1	0	0	0	0	2	2
604	1	0	0	1	0	0	0	0	2	1
605	0	1	0	0	0	0	0	0	1	0
606	0	0	0	0	0	0	0	0	1	3
607	0	0	0	0	0	0	0	0	2	3
608	0	1	0	0	0	0	0	0	2	1
609	1	1	0	0	0	0	0	0	1	0
610	1	1	0	0	0	0	0	0	3	0
611	1	0	0	0	0	0	0	0	1	2
612	1	1	0	0	0	0	0	0	4	2
613	0	1	0	0	0	0	0	0	2	0
614	1	1	0	0	0	0	0	0	3	1
615	1	0	1	0	0	0	0	0	2	1
616	0	0	0	0	0	0	0	0	1	0
617	0	0	0	0	0	0	0	0	3	2
618	0	1	0	0	0	0	1	0	2	2
619	1	0	0	0	0	0	0	0	2	1
620	2	0	0	0	0	0	1	0	1	1
621	0	1	0	0	0	0	0	0	3	1
622	1	0	0	0	0	0	0	0	2	2
623	0	0	0	0	0	0	0	0	0	3
624	1	1	0	0	0	0	1	0	1	1
625	0	0	0	0	0	0	0	0	2	2
626	2	0	0	0	0	0	1	0	3	1
627	0	0	0	0	0	0	0	0	1	1
628	1	0	0	0	0	0	0	0	1	0
629	0	0	0	0	0	0	0	0	2	2
630	1	1	0	0	0	0	0	0	2	0
631	0	0	0	0	0	0	0	0	2	0
632	0	1	0	0	0	0	0	0	2	3
633	1	0	0	0	0	0	0	1	1	3
634	2	0	0	0	0	0	1	0	3	1
635	0	0	0	0	0	0	0	1	2	1
636	1	0	0	0	0	0	0	0	2	2
637	0	0	0	0	0	0	0	0	2	1
638	1	1	0	0	0	0	0	0	2	1
639	1	1	0	0	0	0	0	0	1	1
640	0	0	0	0	0	0	1	0	1	4
641	0	0	0	0	0	0	1	0	2	0
642	0	0	0	0	0	0	0	0	3	1
643	0	0	0	0	0	0	0	0	1	2
644	0	0	0	0	0	0	0	0	2	2
645	2	0	0	0	0	0	0	1	0	2
646	2	0	0	0	0	0	1	0	1	1
647	0	1	0	0	0	0	0	0	3	2
648	1	0	0	0	0	0	0	0	1	2
649	0	0	0	0	0	0	0	0	2	0
650	0	0	0	0	0	0	0	0	2	1
651	1	1	0	0	0	0	0	0	1	1
652	0	0	0	0	0	0	0	0	4	1
653	1	0	0	0	0	0	0	0	2	0
654	0	0	0	0	0	0	0	0	1	3
655	1	0	0	0	0	0	0	0	1	0
656	0	0	0	0	0	0	0	0	2	0
657	0	0	0	0	0	0	0	0	2	0
658	1	0	0	0	0	0	0	0	3	0
659	2	0	0	0	0	0	1	0	1	2
660	1	1	0	0	0	0	0	0	2	3
661	2	0	0	0	0	0	0	0	2	1
662	2	0	1	0	0	0	0	0	1	3
663	0	0	0	0	0	0	0	0	3	2
664	1	0	0	0	0	0	0	0	3	0
665	0	0	0	0	0	0	0	0	2	1
666	0	0	0	0	0	0	0	0	2	1
667	1	0	0	0	0	0	0	0	3	1
668	0	0	0	0	0	0	0	0	2	1
669	0	0	0	0	0	0	0	0	0	2
670	1	0	0	0	0	0	1	0	3	2
671	0	0	0	0	0	0	0	0	1	0
672	0	1	0	0	0	0	0	0	0	2
673	0	0	0	0	0	0	0	0	2	4
674	1	0	0	0	0	0	0	0	1	1
675	0	0	0	0	0	0	0	0	4	1
676	0	1	0	0	0	0	0	0	1	2
677	0	1	0	0	0	0	0	0	2	3
678	1	0	0	0	0	0	0	0	0	5
679	0	1	0	0	0	0	0	0	5	2
680	0	0	0	0	0	0	0	0	1	1
681	1	0	0	0	0	0	0	0	2	2
682	0	1	0	0	0	0	0	0	1	0
683	0	0	0	0	0	0	0	0	3	1
684	0	0	0	0	0	0	0	0	1	3
685	0	0	0	0	0	0	0	0	1	0
686	1	0	0	0	0	0	0	0	2	1
687	1	0	0	0	0	0	0	0	2	2
688	1	0	0	0	0	0	0	0	2	2
689	1	0	0	0	0	0	0	0	2	2
690	0	0	0	0	0	0	0	0	2	1
691	1	0	0	0	0	0	0	0	1	3
692	0	0	0	0	0	0	1	1	1	4
693	1	0	0	0	0	0	0	0	0	2
694	1	0	0	0	0	0	0	0	1	3
695	1	0	0	0	0	0	0	0	1	2
696	1	0	0	0	0	0	0	0	1	2
697	2	0	0	0	0	0	0	0	3	2
698	1	0	0	0	0	0	1	0	0	0
699	0	0	0	0	0	0	0	0	1	1
700	0	0	0	0	0	0	0	0	3	2
701	1	0	0	0	0	0	0	0	0	3
702	2	0	0	0	0	0	1	0	1	0
703	3	0	0	0	0	0	0	0	0	3
704	3	0	0	0	0	0	0	0	2	0
705	2	0	0	0	0	0	1	0	1	1
706	1	0	0	0	0	0	0	0	1	2
707	2	0	0	0	0	0	0	0	3	3
708	0	0	0	0	0	0	0	0	2	1
709	1	0	0	0	0	0	1	0	0	2
710	0	0	0	0	0	0	0	0	2	0
711	0	0	0	0	0	0	1	0	1	2
712	1	0	0	0	0	0	0	0	1	1
713	0	0	0	0	0	0	1	0	1	2
714	1	0	0	0	0	0	0	0	2	1
715	0	0	0	0	0	0	0	0	1	1
716	1	0	0	0	0	0	0	0	3	1
717	0	0	0	0	0	0	0	0	3	2
718	1	0	0	0	0	0	0	0	1	1
719	1	0	0	0	0	0	0	0	2	0
720	0	0	0	0	0	0	0	0	1	2
721	0	0	0	0	0	0	0	0	3	2
722	2	0	0	0	0	0	0	0	1	2
723	0	0	0	0	0	0	1	0	3	2
724	1	0	0	0	0	0	0	0	3	1
725	0	0	0	0	0	0	0	0	2	0
726	1	0	0	0	0	0	0	0	1	1
727	0	0	0	0	0	0	0	0	0	2
728	0	0	0	0	0	0	0	0	2	1
729	0	0	0	0	0	0	0	0	2	1
730	0	0	0	0	0	0	0	0	3	2
731	0	0	0	0	0	0	0	0	2	1
732	0	0	0	0	0	0	0	0	0	0
733	0	0	0	0	0	0	0	0	2	2
734	0	0	0	0	0	0	0	0	1	0
735	2	0	0	0	0	0	0	0	1	0
736	0	0	0	0	0	0	0	0	3	1
737	0	0	0	0	0	0	0	0	1	2
738	1	0	0	0	0	0	0	0	2	0
739	1	0	0	0	0	0	0	0	1	1
740	0	0	0	0	0	0	0	0	1	1
741	0	0	0	0	0	0	0	0	2	1
742	0	0	0	0	0	0	0	0	2	0
743	0	0	0	0	0	0	0	0	3	3
744	1	0	0	0	0	0	0	0	1	1
745	0	0	0	0	0	0	0	0	2	0
746	0	0	0	0	0	0	0	0	3	2
747	1	0	0	0	0	0	0	0	4	2
748	1	0	0	0	0	0	0	0	2	1
749	0	0	0	0	0	0	0	0	2	2
750	1	0	0	0	0	0	0	0	1	1
751	0	0	0	0	0	0	0	0	0	1
752	1	0	0	0	0	0	1	0	2	1
753	1	0	0	0	0	0	1	0	2	3
754	1	0	0	0	0	0	0	0	3	1
755	1	0	0	0	0	0	0	0	2	2
756	0	0	0	0	0	0	0	0	2	2
757	1	0	0	0	0	0	0	0	2	3
758	0	0	0	0	0	0	0	0	1	1
759	1	0	0	0	0	0	0	0	1	2
760	1	0	0	0	0	0	0	0	2	2
761	1	0	0	0	0	0	0	0	0	3
762	1	0	0	0	0	0	0	0	2	0
763	1	0	0	0	0	0	0	0	0	2
764	1	0	0	0	0	0	0	0	1	0
765	0	0	0	0	0	0	0	0	4	2
766	0	0	0	0	0	0	0	0	0	3
767	0	0	0	0	0	0	0	0	1	1
768	1	0	0	0	0	0	0	0	3	0
769	0	0	0	0	0	0	0	0	1	0
770	0	0	0	0	0	0	0	0	0	0
771	0	0	0	0	0	0	0	0	1	1
772	1	0	0	0	0	0	0	0	3	0
773	0	0	0	0	0	0	0	0	1	1
774	0	0	0	0	0	0	0	0	2	1
775	0	0	0	0	0	0	1	0	1	0
776	1	0	0	0	0	0	1	0	2	1
777	0	0	0	0	0	0	0	0	2	2
778	1	0	0	0	0	0	0	0	2	2
779	0	0	0	0	0	0	0	0	2	2
780	1	0	0	0	0	0	0	0	2	2
781	1	0	0	0	0	0	0	0	2	2
782	1	0	0	0	0	0	0	0	3	2
783	1	0	0	0	0	0	0	0	2	3
784	0	0	0	0	0	0	0	0	0	2
785	0	0	0	0	0	0	1	0	1	3
786	0	0	0	0	0	0	0	0	2	1
787	1	0	0	0	0	0	0	0	2	2
788	1	0	0	0	0	0	0	0	0	1
789	0	0	0	0	0	0	0	0	0	1
790	0	0	0	0	0	0	0	0	2	2
791	0	0	0	0	0	0	0	0	2	1
792	0	0	0	0	0	0	0	0	0	0
793	1	0	0	0	0	0	0	0	1	0
794	1	0	0	0	0	0	0	0	3	2
795	1	0	0	0	0	0	0	0	2	2
796	1	0	0	0	0	0	0	0	1	2
797	1	0	0	0	0	0	0	0	1	1
798	0	0	0	0	0	0	0	0	4	0
799	1	0	0	0	0	0	0	0	2	3
800	1	0	0	0	0	0	0	0	0	2
801	0	0	0	0	0	0	0	0	2	2
802	0	0	0	0	0	0	0	0	1	2
803	1	0	0	0	0	0	0	0	3	4
804	0	0	0	0	0	0	0	0	0	3
805	1	0	0	0	0	0	0	0	2	3
806	0	0	0	0	0	0	0	0	2	1
807	0	0	0	0	0	0	0	0	1	2
808	1	0	0	0	0	0	0	0	1	3
809	0	0	0	0	0	0	0	0	2	3
810	0	0	0	0	0	0	0	0	2	1
811	1	0	0	0	0	0	0	0	1	1
812	0	0	0	0	0	0	0	0	4	0
813	0	0	0	0	0	0	0	0	2	2
814	0	0	0	0	0	0	0	0	1	1
815	0	0	0	0	0	0	0	0	0	1
816	1	0	0	0	0	0	0	0	2	1
817	0	0	0	0	0	0	0	0	2	1
818	1	0	0	0	0	0	0	0	2	1
819	0	0	0	0	0	0	0	0	2	3
820	0	0	0	0	0	0	0	0	3	1
821	1	0	0	0	0	0	0	0	3	1
822	1	0	0	0	0	0	0	0	1	3
823	0	0	0	0	0	0	0	0	1	0
824	1	0	0	0	0	0	0	0	1	3
825	1	0	0	0	0	0	0	0	1	2
826	0	0	0	0	0	0	0	0	3	2
827	0	0	0	0	0	0	0	0	3	2
828	0	0	0	0	0	0	0	0	2	2
829	2	0	0	0	0	0	0	0	2	1
830	0	0	0	0	0	0	0	0	1	1
831	2	0	0	0	0	0	0	0	0	1
832	2	0	0	0	0	0	0	0	0	2
833	0	0	0	0	0	0	0	0	2	2
834	0	0	0	1	0	0	0	0	1	1
835	1	0	0	0	0	0	0	0	0	2
836	1	0	0	0	0	0	0	0	2	0
837	1	0	0	0	0	0	1	0	1	1
838	0	0	0	1	0	0	0	0	2	2
839	2	0	0	0	0	0	0	0	0	3
840	1	0	0	1	0	0	0	0	2	3
841	0	0	0	0	0	0	0	0	3	2
842	1	0	0	0	0	0	0	0	1	2
843	0	0	0	1	0	0	0	0	2	3
844	0	0	0	0	0	0	1	0	2	0
845	1	0	0	0	0	0	0	0	2	4
846	0	0	0	0	0	0	0	0	1	0
847	1	0	0	0	0	0	0	0	1	3
848	1	0	0	1	0	0	0	0	1	3
849	2	0	0	0	0	0	0	0	1	2
850	0	1	0	1	0	0	0	0	2	3
851	0	0	0	0	0	0	0	0	1	3
852	1	0	0	0	0	0	1	0	1	3
853	1	0	0	0	0	0	0	0	3	3
854	0	0	0	0	0	0	0	0	2	2
855	0	0	0	0	0	0	0	0	0	2
856	1	1	0	0	0	0	0	0	2	4
857	0	0	0	0	0	0	0	0	2	4
858	1	0	0	0	0	0	0	0	3	3
859	0	0	0	0	0	0	0	0	2	1
860	0	0	0	0	0	0	0	0	2	1
861	0	0	0	0	0	0	0	0	1	0
862	1	0	0	0	0	0	0	0	3	3
863	1	0	0	0	0	0	0	0	2	2
864	0	0	0	0	0	0	0	0	3	1
865	0	0	0	0	0	0	0	0	1	2
866	0	0	0	0	0	0	0	0	3	2
867	1	0	0	0	0	0	0	0	1	3
868	0	0	0	0	0	0	0	0	1	3
869	0	0	0	0	0	0	1	0	0	3
870	0	0	0	0	0	0	0	0	1	2
871	0	0	0	0	0	0	0	0	3	3
872	0	0	0	0	0	0	0	0	0	3
873	0	0	0	0	0	0	0	0	3	3
874	0	0	0	0	0	0	0	0	1	3
875	1	0	0	0	0	0	0	0	2	2
876	0	0	0	0	0	0	0	0	3	2
877	1	0	0	0	0	0	0	0	3	4
878	1	0	0	0	0	0	0	0	2	5
879	1	0	0	0	0	0	0	0	0	4
880	1	0	0	0	0	0	0	0	2	0
881	1	0	0	0	0	0	0	0	1	2
882	1	0	0	0	0	0	0	0	0	4
883	1	0	0	0	0	0	0	0	1	1
884	0	0	0	0	0	0	0	0	3	1
885	0	0	0	0	0	0	0	0	3	1
886	0	0	0	0	0	0	0	0	1	1
887	0	0	0	0	0	0	0	0	2	0
888	0	0	0	0	0	0	0	0	2	2
889	0	0	0	0	0	0	0	0	0	1
890	1	0	0	0	0	0	0	0	1	0
891	0	0	0	0	0	0	0	0	1	2
892	0	0	0	0	0	0	0	0	3	2
893	0	0	0	0	0	0	0	0	2	1
894	0	0	0	0	0	0	0	0	2	1
895	0	0	0	0	0	0	0	0	1	2
896	1	0	0	0	0	0	0	0	2	1
897	0	0	0	0	0	0	0	0	2	2
898	1	0	0	0	0	0	0	0	2	3
899	1	0	0	0	0	0	0	0	0	1
900	0	0	0	0	0	0	0	0	1	1
901	1	0	0	0	0	0	0	0	3	3
902	0	0	0	0	0	0	0	0	3	2
903	1	0	0	0	0	0	0	0	2	1
904	0	0	0	0	0	0	0	0	2	4
905	1	0	0	0	0	0	0	0	1	3
906	0	0	0	0	0	0	0	0	1	2
907	2	0	0	0	0	0	0	0	3	1
908	1	0	0	0	0	0	0	0	2	2
909	0	0	0	0	0	0	0	0	2	1
910	1	0	0	0	0	0	0	0	1	3
911	1	0	0	0	0	0	0	0	1	2
912	0	0	0	0	0	0	0	0	2	0
913	0	0	0	0	0	0	0	0	2	2
914	0	0	0	0	0	0	0	0	2	2
915	1	0	0	0	0	0	0	0	1	2
916	0	0	0	0	0	0	0	0	3	2
917	0	0	0	0	0	0	0	0	0	1
918	0	0	0	0	0	0	0	0	4	3
919	0	0	0	0	0	0	0	0	1	0
920	0	0	0	0	0	0	0	0	3	1
921	2	0	0	0	0	0	0	0	3	0
922	1	0	0	0	0	0	0	0	0	3
923	1	0	0	0	0	0	0	0	1	2
924	0	0	0	0	0	0	0	0	2	1
925	0	0	0	0	0	0	0	0	3	1
926	1	0	0	0	0	0	0	0	1	0
927	1	0	0	0	0	0	0	0	1	1
928	1	0	0	0	0	0	0	0	2	1
929	1	0	0	0	0	0	0	0	1	4
930	1	0	0	0	0	0	0	0	2	3
931	0	0	0	1	0	0	0	0	2	3
932	0	0	0	0	0	0	0	0	2	1
933	0	0	0	0	0	0	0	0	2	2
934	0	0	0	1	0	0	0	0	2	3
935	0	0	0	0	0	0	0	0	3	2
936	0	0	0	1	0	0	0	0	2	2
937	1	0	0	0	0	0	0	0	1	0
938	0	0	0	0	0	0	0	0	2	3
939	1	0	0	0	0	0	0	0	1	0
940	2	0	0	1	0	0	0	0	2	2
941	3	0	0	0	0	0	0	0	1	4
942	3	0	0	0	0	0	0	0	2	3
943	0	0	0	1	0	0	0	0	1	1
944	0	0	0	1	0	0	0	0	0	1
945	1	0	0	1	0	0	0	0	1	1
946	1	0	0	0	0	0	0	0	0	1
947	1	0	0	0	0	0	0	0	2	2
948	0	0	0	1	0	0	0	0	1	1
949	1	0	0	1	0	0	0	0	2	0
950	1	0	0	0	0	0	0	0	2	1
951	1	0	0	0	0	0	0	0	2	1
952	1	0	0	1	0	0	0	0	1	2
953	0	0	0	0	0	0	0	0	2	0
954	0	1	0	0	0	0	0	0	1	1
955	1	1	0	1	0	0	0	0	3	2
956	1	0	0	1	0	0	0	0	3	2
957	0	0	0	1	0	0	0	0	2	1
958	0	0	0	1	0	0	0	0	2	2
959	1	0	0	0	0	0	0	0	3	1
960	1	0	0	0	0	0	0	0	1	1
961	0	0	0	0	0	0	0	0	2	0
962	1	1	0	0	0	0	0	0	3	1
963	1	0	0	1	0	0	0	0	1	2
964	1	1	0	0	0	0	0	0	3	1
965	1	0	0	1	0	0	0	0	2	1
966	1	0	0	1	0	0	0	0	2	2
967	0	0	0	0	0	0	0	0	1	2
968	0	0	0	0	0	0	0	0	1	2
969	0	0	0	0	0	0	0	0	2	3
970	0	0	1	0	0	0	0	0	1	1
971	1	0	1	0	0	0	0	0	0	2
972	1	0	1	0	0	0	0	0	1	3
973	2	0	0	0	0	0	0	0	1	0
974	2	0	0	0	0	0	0	0	3	0
975	2	0	1	0	0	0	0	0	0	1
976	0	0	0	0	0	0	0	0	4	0
977	1	0	1	0	0	0	0	0	0	1
978	1	0	1	0	0	0	0	0	1	1
979	1	0	0	0	0	0	0	0	3	2
980	0	0	1	0	0	0	0	0	1	3
981	1	0	0	0	0	0	0	0	2	2
982	0	0	1	0	0	0	0	0	1	2
983	1	0	0	0	0	0	0	0	2	1
984	0	0	1	0	0	0	0	0	4	3
985	1	0	1	0	0	0	1	1	1	1
986	1	0	0	0	0	0	0	0	2	2
987	0	0	0	0	0	0	0	0	1	4
988	2	0	1	0	0	0	0	1	2	3
989	0	0	1	0	0	0	0	1	2	1
990	0	0	0	0	0	0	0	0	1	3
991	0	0	0	0	0	0	0	0	2	3
992	0	0	1	0	0	0	0	0	2	2
993	0	0	0	0	0	0	0	0	2	3
994	0	0	1	0	0	0	0	0	3	2
995	1	0	1	0	0	0	0	0	2	2
996	1	0	1	0	0	0	0	0	1	3
997	1	0	0	0	0	0	0	0	1	2
998	1	0	0	0	0	0	0	0	0	2
999	0	0	0	0	0	0	0	0	2	1
1000	0	1	0	0	0	0	1	0	1	4
1001	0	0	1	0	0	0	0	0	2	2
1002	0	0	0	0	0	0	1	0	1	3
1003	2	0	0	0	0	0	0	0	4	1
1004	1	1	1	0	0	0	0	0	2	2
1005	1	0	0	0	0	0	0	0	0	1
1006	0	0	1	0	0	0	0	0	3	2
1007	0	0	0	0	0	0	0	0	2	1
1008	0	0	0	0	0	0	0	0	3	3
1009	2	0	1	0	0	0	0	0	1	1
1010	1	0	0	0	0	0	0	0	1	1
1011	2	0	0	0	0	0	0	0	3	2
1012	1	0	0	0	0	0	0	0	1	3
1013	1	0	0	0	0	0	0	0	2	1
1014	1	0	0	0	0	0	0	0	2	5
1015	0	0	0	0	0	0	0	0	2	2
1016	0	0	0	0	0	0	0	0	0	1
1017	1	0	0	0	1	0	1	0	4	4
1018	1	0	0	0	0	0	0	0	2	4
1019	0	0	0	0	0	0	0	0	2	3
1020	1	0	0	0	0	0	0	0	1	3
1021	0	0	0	0	0	0	1	0	2	3
1022	0	0	0	0	0	0	0	0	1	3
1023	0	0	0	0	0	0	0	0	0	3
1024	1	0	0	0	0	0	0	0	3	3
1025	1	0	0	0	0	0	0	0	1	1
1026	0	0	0	0	0	0	0	0	3	0
1027	0	0	0	0	0	0	1	0	1	5
1028	1	0	0	0	0	0	0	0	3	3
1029	0	0	0	0	0	0	0	0	1	2
1030	0	0	0	0	0	0	0	0	2	1
1031	1	0	0	0	0	0	0	0	3	0
1032	0	0	0	0	0	0	0	0	0	0
1033	0	0	0	0	0	0	0	0	1	1
1034	1	0	0	0	0	0	0	0	2	2
1035	1	0	0	0	0	0	0	0	1	1
1036	0	0	0	0	0	0	0	0	3	0
1037	1	0	0	0	0	0	0	0	0	2
1038	1	0	0	0	0	0	0	0	2	1
1039	1	0	0	0	0	0	0	0	2	2
1040	1	0	0	0	0	0	1	0	2	1
1041	0	0	0	0	0	0	0	0	1	2
1042	0	0	1	0	0	0	0	0	3	2
1043	1	0	0	0	0	0	0	0	2	0
1044	1	1	0	0	0	0	0	0	2	2
1045	0	0	0	0	0	0	0	0	2	2
1046	0	0	0	0	0	0	0	0	2	3
1047	1	0	0	0	0	0	0	0	1	2
1048	0	0	0	0	0	0	0	0	2	2
1049	1	0	0	0	0	0	0	0	2	1
1050	1	0	0	0	0	0	0	0	1	2
1051	0	0	0	0	0	0	0	0	2	1
1052	1	0	0	0	0	0	1	0	2	2
1053	0	0	0	0	0	0	0	0	3	2
1054	0	0	0	0	0	0	0	0	1	3
1055	0	0	0	0	0	0	0	0	3	1
1056	1	0	0	0	0	0	0	0	0	1
1057	1	0	0	0	0	0	0	0	3	2
1058	0	0	0	0	0	0	0	0	1	1
1059	1	0	0	0	0	0	0	0	1	1
1060	0	0	0	0	0	0	0	0	3	0
1061	1	0	0	0	0	0	0	0	3	1
1062	0	0	0	0	0	0	0	0	3	2
1063	1	0	0	0	0	0	0	0	3	1
1064	1	0	0	1	0	0	0	0	1	2
1065	1	0	0	0	0	0	0	0	2	1
1066	1	0	0	0	0	0	0	0	1	3
1067	1	0	0	1	0	0	0	0	2	3
1068	1	0	0	0	0	0	0	0	3	2
1069	1	0	0	1	0	0	0	0	4	1
1070	0	0	0	1	0	0	0	0	2	2
1071	0	0	0	0	0	0	0	0	4	0
1072	0	0	0	0	0	0	0	0	1	0
1073	1	1	0	0	0	0	0	0	2	2
1074	0	0	0	0	0	0	0	0	2	1
1075	0	0	0	0	0	0	0	0	1	3
1076	0	0	0	1	0	0	0	0	3	1
1077	1	0	0	1	0	0	0	0	3	1
1078	2	0	0	1	0	0	0	0	3	1
1079	0	0	0	0	0	0	0	0	3	1
1080	1	0	1	1	0	0	0	0	1	1
1081	0	0	1	0	0	0	0	0	1	1
1082	0	0	1	0	0	0	0	0	2	1
1083	0	0	1	1	0	0	0	0	3	0
1084	0	0	1	1	0	0	0	0	2	0
1085	1	0	0	1	0	0	0	0	1	0
1086	0	0	0	1	0	0	0	0	2	0
1087	1	0	0	0	0	0	0	0	1	0
1088	1	0	1	0	0	0	0	0	3	2
1089	1	0	1	0	0	0	0	0	2	2
1090	0	1	1	0	0	0	0	0	2	3
1091	1	0	1	0	0	0	0	0	1	1
1092	1	0	1	0	0	0	0	0	2	1
1093	1	0	0	0	0	0	0	0	1	1
1094	1	0	1	0	0	0	0	0	1	2
1095	1	0	1	0	0	0	0	0	0	1
1096	1	0	1	0	0	0	0	0	3	2
1097	1	0	1	0	0	0	0	0	2	1
1098	1	0	1	0	0	0	0	0	1	4
1099	0	0	1	0	0	0	0	0	2	1
1100	1	0	0	0	0	0	0	0	3	2
1101	0	0	0	0	0	0	0	0	1	3
1102	0	0	0	0	0	0	0	0	5	3
1103	0	0	1	0	0	0	0	0	3	2
1104	0	0	0	0	0	0	0	0	2	2
1105	2	0	0	0	0	0	0	0	2	2
1106	1	0	1	0	0	0	0	0	2	3
1107	0	0	0	0	0	0	0	0	0	3
1108	0	0	1	0	0	0	0	0	2	4
1109	0	0	1	0	0	0	0	0	0	1
1110	0	0	0	0	0	0	0	0	1	2
1111	0	0	0	0	0	0	0	0	2	3
1112	1	0	1	0	0	0	0	0	1	3
1113	1	0	1	0	0	0	0	0	2	2
1114	2	0	1	1	0	0	0	0	0	1
1115	2	0	1	0	0	0	0	0	3	1
1116	1	0	1	0	0	0	0	0	2	2
1117	0	0	0	0	0	0	0	0	0	1
1118	0	0	0	0	0	0	0	0	1	0
1119	1	0	0	0	0	0	0	0	2	2
1120	2	0	0	0	0	0	1	0	2	2
1121	2	0	1	0	0	0	0	0	1	2
1122	0	0	1	0	0	0	0	0	3	2
1123	0	0	0	0	0	0	0	0	1	3
1124	2	0	0	0	0	0	0	0	1	1
1125	0	0	0	1	0	0	0	0	3	1
1126	0	0	1	0	0	0	1	0	2	3
1127	1	0	1	1	0	0	0	0	1	2
1128	1	0	1	1	0	0	1	0	1	3
1129	0	0	1	0	0	0	0	0	3	1
1130	0	0	0	0	0	0	1	0	2	2
1131	0	0	1	0	0	0	0	0	3	2
1132	1	0	0	1	0	0	0	0	2	1
1133	1	0	0	1	0	0	0	0	0	4
1134	0	0	1	0	1	0	0	0	2	1
1135	0	0	0	0	0	0	0	0	2	2
1136	0	0	0	0	0	0	0	0	1	3
1137	0	1	0	0	0	0	0	0	2	2
1138	0	0	1	1	0	0	0	0	0	2
1139	1	0	0	0	0	0	0	0	2	0
1140	0	0	1	0	0	0	0	0	2	3
1141	1	0	1	0	0	0	0	0	1	4
1142	1	0	1	0	1	0	0	0	3	0
1143	0	0	1	0	0	0	0	0	2	3
1144	0	0	0	0	0	0	0	0	1	1
1145	1	0	0	0	0	0	0	0	2	0
1146	0	0	0	0	0	0	0	0	1	1
1147	1	0	0	0	1	0	0	0	2	2
1148	0	0	1	0	0	0	0	0	0	3
1149	1	0	0	0	0	0	0	0	3	1
1150	1	1	0	0	1	0	0	0	3	2
1151	0	1	1	0	0	0	0	0	2	1
1152	1	0	1	0	0	0	0	0	3	1
1153	0	0	1	0	1	0	0	0	1	2
1154	0	0	1	0	0	0	0	0	3	1
1155	1	0	0	0	0	0	0	0	1	2
1156	0	0	1	0	0	0	0	0	5	2
1157	1	0	0	1	0	0	0	0	2	0
1158	1	0	0	0	0	0	0	0	1	0
1159	0	0	1	0	0	0	0	0	2	1
1160	1	0	1	0	0	0	0	0	2	0
1161	0	1	1	0	0	0	0	0	2	2
1162	0	0	1	0	0	0	0	0	2	1
1163	0	0	0	0	0	0	0	0	1	1
1164	1	0	1	0	0	0	0	0	2	1
1165	0	0	1	0	0	0	0	0	2	2
1166	0	0	1	1	0	0	0	0	2	2
1167	1	0	1	0	1	0	0	0	1	2
1168	0	0	1	0	0	0	0	0	0	3
1169	1	0	1	1	0	0	0	0	1	2
1170	1	0	1	0	0	0	0	0	3	2
1171	1	0	1	0	0	0	0	1	3	1
1172	1	0	1	1	0	0	0	0	2	2
1173	0	0	1	0	0	0	0	0	3	2
1174	1	0	0	0	1	0	0	0	1	1
1175	1	0	0	0	0	0	0	0	2	1
1176	0	0	1	0	1	0	0	0	2	2
1177	1	0	1	0	1	0	0	0	2	2
1178	1	0	1	0	1	0	0	1	1	1
1179	1	1	0	0	0	0	0	0	2	2
1180	2	0	1	0	0	0	0	0	2	3
1181	0	0	0	1	0	0	0	0	1	2
1182	0	0	1	1	0	0	0	0	1	3
1183	1	0	1	0	1	0	0	0	0	1
1184	1	0	0	0	0	0	0	0	4	4
1185	0	0	1	0	0	0	0	0	3	2
1186	0	0	1	0	0	0	0	0	1	0
1187	0	0	1	0	0	0	0	0	2	0
1188	1	0	1	0	0	0	0	0	1	2
1189	2	0	1	0	1	0	0	0	4	2
1190	0	0	0	0	0	0	0	0	2	2
1191	1	0	1	0	0	0	0	0	3	1
1192	1	0	0	0	0	0	0	0	2	2
1193	1	0	1	0	0	0	0	0	2	0
1194	0	0	1	0	0	0	0	0	2	1
1195	0	0	1	0	0	0	0	0	2	0
1196	2	0	0	0	0	0	0	0	1	1
1197	0	0	1	0	0	0	0	0	4	1
1198	1	0	0	0	0	0	0	0	1	3
1199	0	0	1	0	0	0	0	0	2	2
1200	1	0	1	0	0	0	0	0	2	2
1201	0	0	1	0	0	0	0	0	1	3
1202	1	0	0	0	0	0	0	0	2	3
1203	0	0	1	0	0	0	0	0	1	2
1204	0	0	0	0	0	0	0	0	1	2
1205	1	0	1	0	0	0	0	0	2	3
1206	1	1	1	0	0	0	0	0	3	2
1207	1	0	1	0	0	0	0	0	2	2
1208	1	0	1	0	0	0	0	0	2	3
1209	1	0	1	0	0	0	0	0	1	1
1210	1	0	0	0	0	0	0	0	2	3
1211	0	1	1	0	0	0	0	0	2	4
1212	1	0	1	0	0	0	0	2	1	2
1213	1	0	0	0	0	0	0	0	2	0
1214	0	0	1	0	0	0	0	0	1	0
1215	0	0	0	0	0	0	0	0	1	2
1216	1	0	0	0	0	0	0	0	3	1
1217	0	0	0	0	0	0	0	0	2	2
1218	0	0	1	0	0	0	0	0	3	3
1219	0	0	1	0	1	0	0	0	3	0
1220	1	1	0	0	1	0	0	0	3	2
1221	1	0	1	0	0	0	0	0	1	2
1222	0	0	0	0	0	0	0	0	3	3
1223	0	0	0	0	0	0	0	0	1	1
1224	1	0	1	0	1	0	0	0	2	0
1225	0	0	1	0	0	1	0	0	2	1
1226	1	1	1	0	1	0	0	0	1	1
1227	2	0	1	0	0	0	0	0	1	4
1228	1	0	1	0	0	0	0	0	2	2
1229	1	0	1	0	0	0	0	0	1	2
1230	0	0	1	0	0	0	0	0	2	2
1231	0	0	0	0	0	0	0	0	2	2
1232	0	0	0	0	0	0	0	0	1	1
1233	1	0	0	0	0	0	0	0	2	1
1234	2	0	1	0	0	0	0	0	1	3
1235	0	0	1	0	0	0	0	0	0	2
1236	0	0	1	0	0	0	0	0	1	1
1237	0	0	1	0	0	0	0	0	2	1
1238	0	0	1	0	0	0	0	1	2	2
1239	1	0	0	0	0	0	0	0	1	2
1240	0	0	0	0	0	0	0	0	2	1
1241	1	0	1	0	1	0	0	0	2	1
1242	1	0	1	0	0	0	0	0	1	2
1243	0	0	1	0	0	0	0	0	3	3
1244	0	0	0	0	1	0	0	0	1	3
1245	1	0	1	0	0	0	0	0	1	3
1246	0	1	0	0	0	0	0	0	1	3
1247	0	0	1	0	0	0	0	0	1	2
1248	0	0	0	0	0	0	0	0	1	3
1249	1	1	1	0	0	0	0	0	1	0
1250	0	0	0	0	0	0	0	0	2	1
1251	0	1	1	0	0	0	0	0	1	2
1252	0	0	1	0	0	0	0	0	2	1
1253	0	0	1	0	0	0	0	0	0	0
1254	1	0	1	0	0	0	0	0	2	2
1255	1	0	1	0	0	0	0	0	1	3
1256	1	0	1	0	0	0	0	0	0	4
1257	1	0	1	0	0	0	0	0	2	1
1258	0	0	0	0	0	0	0	0	2	1
1259	1	0	1	0	0	0	0	0	1	2
1260	1	0	1	0	0	0	0	0	3	2
1261	1	0	1	0	0	0	0	0	1	2
1262	0	0	1	0	0	0	0	0	3	2
1263	1	0	1	0	0	0	0	0	2	2
1264	1	0	0	0	0	0	0	0	1	2
1265	0	0	1	0	0	0	0	0	1	1
1266	0	0	1	0	0	0	0	1	4	3
1267	0	0	0	0	0	0	0	0	1	1
1268	1	0	0	0	1	0	0	0	1	3
1269	0	1	1	0	0	0	0	0	2	2
1270	1	0	1	0	0	0	0	1	2	2
1271	1	0	0	0	0	0	0	0	2	1
1272	1	0	1	0	0	1	0	0	0	3
1273	0	0	0	0	0	0	0	0	3	2
1274	0	0	1	0	0	0	0	0	3	2
1275	0	0	0	0	0	0	0	0	3	2
1276	1	0	1	0	0	0	0	0	1	2
1277	0	0	0	0	1	0	0	1	2	4
1278	1	0	1	0	0	0	0	0	3	2
1279	0	0	1	0	0	0	0	0	0	2
1280	0	0	0	0	0	0	0	1	1	3
1281	0	1	1	0	0	0	0	1	0	3
1282	0	0	1	0	0	0	0	0	2	3
1283	1	0	1	0	0	0	0	0	1	1
1284	1	0	1	0	0	0	0	1	0	2
1285	0	0	0	0	0	0	0	0	1	2
1286	1	0	0	0	0	0	0	1	1	2
1287	1	1	1	0	0	0	0	0	2	1
1288	1	0	0	0	0	0	0	0	2	3
1289	1	0	0	0	0	0	0	1	2	2
1290	1	1	0	0	1	0	0	0	2	1
1291	0	0	0	0	0	0	0	1	1	3
1292	0	0	1	0	1	0	0	0	1	2
1293	0	0	0	0	1	0	0	0	2	1
1294	0	0	1	0	0	1	0	0	1	1
1295	1	0	1	0	0	0	0	1	2	2
1296	0	0	1	0	0	0	0	0	1	1
1297	1	0	0	0	0	0	0	0	2	1
1298	2	0	1	0	0	0	0	1	1	2
1299	1	0	1	0	0	0	0	0	2	1
1300	1	0	0	0	0	0	0	0	0	0
1301	2	0	1	0	0	0	0	0	1	3
1302	2	0	0	0	0	0	0	0	1	1
1303	2	0	0	0	1	0	0	0	2	3
1304	2	0	0	0	0	0	0	0	1	3
1305	1	0	0	0	1	0	0	0	1	3
1306	0	0	0	0	0	0	0	0	1	1
1307	0	0	0	0	0	0	0	0	2	1
1308	1	0	0	0	0	0	0	0	0	2
1309	0	0	0	0	0	0	0	0	3	2
1310	0	0	0	0	0	0	0	0	3	3
1311	0	0	0	0	0	0	0	0	2	2
1312	1	0	0	0	0	0	0	0	1	1
1313	1	0	1	0	0	0	0	0	3	1
1314	0	0	1	0	0	0	0	0	1	4
1315	0	0	0	0	0	0	0	0	1	4
1316	1	0	1	0	1	0	0	0	1	2
1317	0	0	0	0	0	0	0	0	1	3
1318	0	0	1	0	0	0	0	0	1	2
1319	0	0	1	0	1	0	0	0	1	2
1320	2	0	1	0	1	0	0	0	1	3
1321	1	0	0	0	0	0	0	0	2	1
1322	0	0	1	0	0	0	0	0	0	1
1323	0	0	0	0	0	0	0	0	3	1
1324	0	0	1	0	0	0	0	0	1	2
1325	1	0	0	0	0	0	0	0	1	3
1326	0	0	1	0	0	0	0	0	1	2
1327	0	0	0	0	0	0	0	0	1	2
1328	0	0	1	0	0	0	0	0	1	0
1329	1	0	0	0	0	0	0	0	2	3
1330	1	0	0	0	0	0	0	0	2	1
1331	0	1	1	0	0	0	0	0	2	1
1332	0	0	0	0	0	0	0	0	2	1
1333	0	0	1	0	0	0	0	0	0	1
1334	1	0	1	0	0	0	0	0	3	3
1335	0	0	0	0	0	0	0	0	1	3
1336	1	0	0	0	0	0	0	0	0	4
1337	1	0	0	0	0	0	0	0	2	3
1338	0	0	0	0	0	0	0	0	1	3
1339	0	0	1	0	0	0	0	0	1	0
1340	0	0	1	0	0	0	0	0	1	0
1341	1	0	1	0	0	0	0	0	1	2
1342	0	0	1	0	0	0	0	0	2	3
1343	1	0	1	0	0	0	0	0	2	2
1344	0	0	1	0	0	0	0	0	2	0
1345	1	0	1	0	0	0	0	0	1	2
1346	0	0	1	0	0	0	1	0	1	0
1347	1	0	1	0	0	0	0	0	1	1
1348	0	0	0	0	0	0	0	0	1	1
1349	2	0	0	0	0	0	0	0	3	3
1350	1	1	0	0	0	0	0	0	1	2
1351	1	0	0	0	0	0	0	0	1	3
1352	0	0	0	0	0	0	0	0	2	1
1353	2	0	0	0	0	0	0	0	2	2
1354	0	0	0	0	0	0	0	1	1	4
1355	1	0	0	0	0	0	0	1	1	2
1356	0	1	0	0	0	0	0	0	0	2
1357	0	0	0	0	0	0	0	0	1	1
1358	1	0	0	0	0	0	0	0	3	1
1359	2	0	0	0	0	0	0	0	1	2
1360	0	0	0	0	0	0	0	0	2	2
1361	0	0	0	0	0	0	0	0	1	1
1362	0	0	0	0	0	0	0	0	1	2
1363	2	0	0	0	0	0	0	0	2	4
1364	1	0	0	0	0	0	0	0	4	3
1365	1	1	0	0	0	0	0	0	2	0
1366	1	0	0	0	0	0	0	0	2	3
1367	0	0	0	0	0	0	0	0	1	1
1368	2	0	0	0	0	0	0	0	2	3
1369	1	0	0	0	1	1	0	0	1	3
1370	1	0	0	0	1	0	0	0	2	2
1371	0	0	0	0	0	0	0	0	0	2
1372	0	0	0	0	0	0	0	0	3	3
1373	0	0	0	0	0	0	0	0	2	3
1374	1	0	0	0	1	0	0	0	1	3
1375	1	0	0	0	0	0	0	0	0	1
1376	0	0	0	0	0	0	0	0	2	2
1377	2	0	0	0	0	0	0	0	2	0
1378	1	0	0	0	0	0	0	0	0	0
1379	0	0	0	0	1	0	0	0	2	0
1380	0	0	0	0	0	0	0	0	3	1
1381	1	0	0	0	0	0	0	0	0	5
1382	3	0	0	0	1	0	0	0	2	2
1383	1	0	0	0	0	0	0	0	2	3
1384	1	0	0	0	0	0	0	0	1	3
1385	0	0	0	0	0	0	0	0	0	0
1386	1	0	0	0	0	0	0	0	0	1
1387	0	0	1	0	0	0	0	0	1	2
1388	1	0	0	0	0	0	0	0	0	3
1389	0	0	1	0	1	0	0	0	2	2
1390	1	0	0	0	0	0	0	0	2	3
1391	2	0	0	0	0	0	0	0	0	3
1392	1	0	0	0	0	0	0	0	0	2
1393	0	0	0	0	0	0	0	0	2	1
1394	0	0	0	0	0	0	0	1	1	2
1395	0	0	0	0	0	0	0	0	3	2
1396	0	0	0	0	0	0	0	0	2	1
1397	0	0	0	0	0	0	0	0	1	0
1398	0	0	0	0	0	0	0	0	1	1
1399	2	0	0	0	0	0	0	0	0	0
1400	1	0	0	0	0	0	0	0	2	1
1401	0	0	0	0	1	0	0	0	1	0
1402	1	0	0	0	1	0	0	0	1	1
1403	1	0	0	0	0	0	0	0	1	2
1404	0	0	0	0	0	0	0	0	3	3
1405	0	0	0	0	0	0	0	0	2	1
1406	2	0	0	0	1	0	0	0	1	1
1407	1	0	0	0	0	0	0	0	1	1
1408	0	0	0	0	1	0	0	0	1	0
1409	0	0	0	0	0	0	0	1	0	2
1410	2	0	0	0	0	0	0	0	2	1
1411	1	0	0	0	0	0	0	0	2	1
1412	1	0	0	0	0	0	0	0	1	1
1413	1	0	0	0	0	0	0	1	1	1
1414	1	0	1	0	1	0	0	0	3	3
1415	1	0	0	0	0	0	0	1	0	2
1416	0	0	0	0	1	0	0	0	1	3
1417	1	0	1	0	0	0	0	0	1	3
1418	1	0	0	0	0	0	0	1	3	4
1419	0	0	0	0	0	0	0	0	1	2
1420	1	0	0	0	0	0	0	1	0	4
1421	0	0	0	0	0	0	0	0	1	2
1422	1	0	0	0	0	0	0	0	3	2
1423	1	0	0	0	0	0	0	0	2	2
1424	0	0	0	0	0	0	0	0	2	3
1425	2	0	0	0	0	0	0	0	0	4
1426	1	1	0	0	0	0	0	0	2	2
1427	0	1	0	0	0	0	0	0	3	4
1428	1	0	0	0	0	0	0	0	0	1
1429	0	0	0	0	0	0	0	0	2	2
1430	1	0	0	0	0	0	0	0	2	2
1431	1	0	0	0	0	0	0	0	1	3
1432	1	0	0	0	0	0	0	0	2	2
1433	1	1	0	0	1	0	0	0	1	1
1434	1	1	0	0	0	0	0	0	2	1
1435	1	0	0	0	0	1	0	0	0	3
1436	0	0	0	0	0	0	0	0	1	3
1437	1	0	0	0	0	0	0	0	2	4
1438	1	1	0	0	0	0	0	0	2	1
1439	2	0	0	0	0	0	0	0	2	2
1440	1	0	0	0	0	0	0	0	2	3
1441	2	0	0	0	0	0	0	0	2	2
1442	1	0	0	0	0	0	0	0	3	2
1443	1	1	0	0	1	0	0	0	1	4
1444	1	0	0	0	0	0	0	0	2	4
1445	2	0	0	0	0	0	0	0	1	2
1446	0	0	0	0	0	1	0	0	2	4
1447	0	0	0	0	1	0	0	1	1	3
1448	1	0	0	0	0	0	0	0	0	2
1449	0	0	0	0	1	0	0	0	0	2
1450	1	0	0	0	0	0	0	0	3	1
1451	2	0	0	0	0	0	0	1	1	3
1452	0	0	0	0	1	0	0	0	2	4
1453	2	0	0	0	1	0	0	0	1	1
1454	1	0	0	0	0	0	0	0	0	2
1455	1	0	0	0	1	0	0	0	1	0
1456	1	0	0	0	0	0	0	0	2	3
1457	1	0	0	0	0	0	0	1	1	3
1458	2	0	0	0	0	0	0	0	3	4
1459	1	0	0	0	0	0	1	0	2	2
1460	0	0	0	0	0	0	0	0	1	2
1461	2	0	0	0	0	0	0	0	3	3
1462	0	0	0	0	0	0	1	1	1	2
1463	1	0	0	0	0	0	0	0	1	3
1464	1	0	0	0	0	0	0	0	0	3
1465	2	0	0	0	1	0	0	1	3	3
1466	1	0	0	0	1	0	1	0	1	3
1467	2	0	0	0	0	0	0	0	2	1
1468	1	0	0	0	0	0	1	0	1	3
1469	1	0	0	0	0	0	0	0	3	2
1470	2	0	0	0	0	0	1	0	1	3
1471	1	1	0	0	0	0	1	1	1	5
1472	1	0	0	0	0	0	1	0	3	2
1473	2	0	0	0	1	0	1	1	1	2
1474	1	0	0	0	0	0	0	0	0	3
1475	1	0	0	0	0	0	0	0	1	3
1476	2	0	0	0	0	0	0	0	1	2
1477	0	0	0	0	0	0	0	0	1	3
1478	0	0	0	0	0	0	0	0	2	2
1479	0	0	0	0	0	0	0	1	1	2
1480	1	0	0	0	1	0	0	0	1	1
1481	0	0	0	0	0	1	0	0	1	3
1482	0	0	0	0	0	0	0	0	2	1
1483	0	0	0	0	0	0	0	0	2	1
1484	0	0	0	0	0	0	0	1	3	1
1485	0	0	0	0	0	0	0	0	2	1
1486	0	0	0	0	0	0	0	0	2	2
1487	1	0	0	0	0	0	0	1	3	1
1488	0	0	0	0	0	0	0	1	1	2
1489	0	0	0	0	0	0	0	0	2	3
1490	1	0	0	0	0	0	0	1	3	1
1491	0	0	0	0	0	0	0	1	2	0
1492	0	0	0	0	0	0	0	0	2	2
1493	0	0	0	0	1	1	0	0	2	1
1494	1	0	0	0	0	0	0	0	1	1
1495	0	0	0	0	0	0	0	0	0	2
1496	0	0	0	0	0	0	0	0	2	1
1497	0	0	0	0	0	0	0	0	1	0
1498	0	0	0	0	0	0	1	1	1	1
1499	1	0	0	0	0	0	1	0	1	3
1500	2	0	0	0	1	0	1	1	0	1
1501	1	0	0	0	0	0	1	0	0	1
1502	1	0	0	0	1	0	1	0	0	1
1503	0	0	0	0	0	0	0	0	1	0
1504	1	0	0	0	1	0	0	0	2	1
1505	0	0	0	0	0	0	0	0	3	0
1506	2	0	0	0	0	0	0	0	2	2
1507	2	0	0	0	0	0	0	1	3	1
1508	0	0	0	0	0	0	0	0	0	0
1509	1	0	0	0	0	0	1	0	1	1
1510	1	0	0	0	1	0	0	0	3	2
1511	1	0	0	0	0	0	0	1	1	1
1512	0	0	0	0	0	0	0	1	1	2
1513	1	0	0	0	1	0	1	0	1	0
1514	0	0	0	0	0	0	0	1	2	2
1515	0	0	0	0	0	0	0	0	1	2
1516	1	0	0	0	0	0	0	0	0	0
1517	0	0	0	0	0	0	0	0	1	2
1518	0	0	0	0	0	0	0	0	1	1
1519	1	0	0	0	0	0	0	0	2	2
1520	0	0	0	0	0	0	1	1	3	1
1521	1	0	0	0	0	0	1	1	1	1
1522	0	0	0	0	0	0	0	0	1	3
1523	0	0	0	0	0	0	0	1	2	1
1524	0	0	0	0	1	0	0	0	1	2
1525	0	0	0	0	0	0	0	0	1	1
1526	1	0	0	0	0	0	0	1	1	0
1527	0	0	0	0	1	0	0	0	0	0
1528	2	0	0	0	0	0	0	1	2	0
1529	0	0	0	0	0	0	0	1	0	0
1530	2	0	0	0	0	0	1	0	2	0
1531	0	0	0	0	0	0	0	0	1	1
1532	0	0	0	0	0	0	0	0	2	0
1533	0	0	0	0	0	0	0	0	3	4
1534	1	0	0	0	0	0	0	0	2	0
1535	1	0	0	0	1	0	1	0	3	1
1536	2	0	0	0	0	0	1	0	3	2
1537	0	0	0	0	0	0	0	0	3	1
1538	2	0	0	0	0	0	1	1	1	1
1539	0	0	0	0	0	0	1	0	3	2
1540	1	0	0	0	0	0	0	1	1	0
1541	1	0	0	0	0	0	0	1	1	1
1542	0	0	0	0	0	0	0	0	3	1
1543	0	0	0	0	0	0	0	0	2	1
1544	0	0	0	0	0	0	1	0	1	1
1545	0	0	0	0	0	0	0	0	2	2
1546	0	0	0	0	0	0	0	0	2	1
1547	0	0	0	0	0	0	0	0	3	1
1548	0	0	0	0	0	0	0	0	1	1
1549	1	0	0	0	0	0	0	0	2	2
1550	0	0	0	0	0	0	0	0	3	1
1551	2	0	0	0	0	0	1	0	1	3
1552	0	0	0	0	0	0	1	0	1	2
1553	1	0	0	0	0	0	0	1	1	3
1554	0	0	0	0	0	0	1	0	1	3
1555	2	0	0	0	0	0	0	0	1	2
1556	0	0	0	0	0	0	0	0	1	1
1557	1	0	0	0	0	0	1	0	2	1
1558	1	0	0	0	0	0	0	0	2	1
1559	0	0	0	0	1	0	0	0	2	2
1560	1	0	0	0	0	0	0	0	1	0
1561	1	0	0	0	1	0	0	1	1	0
1562	0	0	0	0	0	0	0	0	0	1
1563	2	0	0	0	0	0	0	1	2	1
1564	0	0	0	0	0	0	0	0	1	1
1565	1	0	0	0	0	0	1	0	4	2
1566	1	0	0	0	0	0	0	0	2	2
1567	2	0	0	0	1	0	0	1	1	2
1568	1	0	0	0	1	0	0	1	2	1
1569	1	0	0	0	0	0	1	1	2	2
1570	1	0	0	0	0	0	0	0	3	2
1571	0	0	0	0	1	0	0	1	1	1
1572	1	0	0	0	0	0	0	0	3	1
1573	0	0	0	0	0	0	0	0	0	1
1574	1	0	0	0	0	0	1	0	1	3
1575	0	0	0	0	0	0	1	0	2	0
1576	1	0	0	0	0	0	0	0	2	1
1577	0	0	0	0	0	0	0	0	2	2
1578	2	0	0	0	1	0	0	0	1	0
1579	0	0	0	0	0	0	0	1	1	2
1580	2	0	0	0	0	0	1	0	1	3
1581	0	0	0	0	0	0	1	0	2	1
1582	1	0	0	0	0	0	1	0	1	0
1583	1	0	0	0	0	0	0	1	1	3
1584	1	0	0	0	0	0	0	0	0	0
1585	2	0	0	0	0	0	0	1	0	0
1586	0	0	0	0	0	0	1	0	2	2
1587	1	0	0	0	1	0	0	1	3	0
1588	1	0	0	0	0	0	0	0	1	3
1589	0	0	0	0	0	0	0	1	1	1
1590	0	0	0	0	0	0	0	1	3	1
1591	0	0	0	0	0	0	0	0	2	2
1592	0	0	0	0	0	0	0	0	1	1
1593	0	0	0	0	1	0	1	0	1	1
1594	0	0	0	0	0	0	1	0	1	1
1595	0	0	0	0	0	0	0	0	2	2
1596	0	0	0	0	0	0	0	0	2	2
1597	1	0	0	0	0	0	0	0	2	2
1598	1	0	0	0	0	0	0	0	0	1
1599	1	0	0	0	0	0	0	0	2	2
1600	0	0	0	0	1	0	0	0	1	2
1601	0	0	0	0	0	0	0	1	2	1
1602	0	0	0	0	0	0	0	0	1	0
1603	0	0	0	0	0	0	0	0	1	0
1604	1	0	0	0	0	0	0	0	2	3
1605	1	0	0	0	1	0	0	0	2	1
1606	1	0	0	0	0	0	0	0	1	1
1607	0	0	0	0	0	0	0	0	2	3
1608	1	0	0	0	0	0	0	0	2	2
1609	0	0	0	0	0	0	0	0	2	0
1610	0	0	0	0	0	0	0	0	3	1
1611	1	0	0	0	0	0	0	0	1	1
1612	1	0	0	0	1	0	0	0	1	2
1613	0	0	0	0	0	0	0	0	3	1
1614	1	0	0	0	0	0	0	0	0	2
1615	2	0	0	0	0	0	0	0	1	2
1616	0	1	0	0	0	0	0	0	1	2
1617	0	0	0	0	0	0	0	0	2	2
1618	1	0	0	0	0	0	0	0	2	2
1619	0	0	0	0	1	0	0	0	2	1
1620	1	0	0	0	0	0	0	0	2	1
1621	0	0	0	0	1	0	0	0	0	3
1622	0	0	0	0	0	0	0	0	1	1
1623	0	0	0	0	0	0	0	0	2	1
1624	1	0	0	0	1	0	0	0	1	0
1625	0	0	0	0	0	0	0	0	2	1
1626	1	0	0	0	0	0	0	0	3	1
1627	1	0	0	0	0	0	0	0	3	0
1628	1	0	0	0	1	0	0	0	1	0
1629	0	0	0	0	0	0	0	0	1	2
1630	0	0	0	0	0	0	0	0	1	2
1631	1	0	0	0	0	0	0	0	0	2
1632	0	0	0	0	0	0	0	0	2	0
1633	0	0	0	0	0	0	0	0	3	2
1634	1	0	0	0	0	0	0	0	0	1
1635	1	0	0	0	0	0	0	0	1	0
1636	0	0	0	0	0	0	0	0	1	1
1637	0	0	0	0	0	0	0	0	2	0
1638	0	0	0	0	0	0	0	0	2	0
1639	0	0	0	0	1	0	0	0	1	0
1640	1	0	0	0	0	0	0	0	2	2
1641	0	0	0	0	0	0	0	0	2	1
1642	0	0	0	0	0	0	0	1	2	1
1643	0	0	0	0	0	0	0	1	1	3
1644	2	0	0	0	1	0	0	0	1	2
1645	1	0	0	0	0	0	0	0	2	2
1646	0	0	0	0	0	0	0	0	3	1
1647	0	0	0	0	0	0	0	0	2	1
1648	1	0	0	0	0	0	0	0	2	2
1649	2	0	0	0	0	1	0	0	0	2
1650	1	0	0	0	0	0	0	0	1	2
1651	0	0	0	0	0	0	0	1	2	2
1652	2	0	0	0	0	0	0	1	0	0
1653	2	0	0	0	0	0	0	0	2	1
1654	2	0	0	0	0	0	0	0	2	4
1655	0	0	0	0	1	0	0	0	1	2
1656	0	0	0	0	0	0	0	0	0	1
1657	0	0	0	0	0	0	0	0	0	0
1658	0	0	0	0	1	0	0	0	2	1
1659	0	0	0	0	0	0	0	1	2	3
1660	0	0	0	0	0	0	0	0	2	2
1661	0	0	0	0	0	0	0	0	1	1
1662	0	0	0	0	1	0	0	0	3	2
1663	0	0	0	0	0	0	0	0	2	1
1664	0	0	0	0	0	0	0	0	1	2
1665	0	0	0	0	0	0	0	0	2	1
1666	0	0	0	0	0	0	0	0	3	0
1667	0	0	0	1	0	0	0	0	2	1
1668	0	0	0	0	0	0	0	1	3	0
1669	0	0	0	0	0	0	1	0	1	0
1670	0	0	0	0	0	0	0	0	0	0
1671	0	0	0	0	1	0	0	0	4	1
1672	0	0	0	0	0	0	0	0	1	2
1673	0	0	0	0	0	0	0	0	3	0
1674	0	0	0	0	0	0	0	0	2	1
1675	0	0	0	0	0	0	0	0	2	1
1676	0	0	0	1	0	0	0	0	2	0
1677	0	0	0	0	0	0	0	0	1	1
1678	0	0	0	0	0	0	0	0	2	1
1679	0	0	0	0	0	0	0	0	1	1
1680	0	0	0	0	0	0	0	0	3	0
1681	0	0	0	0	0	0	0	1	2	1
1682	0	0	0	0	0	0	0	0	1	2
1683	0	0	0	0	0	0	0	0	2	1
1684	0	0	0	0	0	0	0	0	3	2
1685	0	0	0	0	0	0	0	0	1	1
1686	0	0	0	0	0	0	0	0	1	1
1687	0	0	0	0	0	0	0	0	1	1
1688	0	0	0	0	0	0	0	0	1	0
1689	0	0	0	0	0	0	0	1	2	2
1690	1	0	0	0	1	0	0	0	1	2
1691	0	0	0	0	1	0	0	0	1	1
1692	0	0	0	0	0	0	0	1	2	3
1693	0	0	0	0	1	0	0	1	3	2
1694	0	0	0	0	0	0	0	1	2	2
1695	0	0	0	0	0	0	0	0	2	0
1696	0	0	0	0	0	0	0	0	0	2
1697	0	0	0	0	0	0	0	0	2	1
1698	0	0	0	0	1	0	0	0	0	1
1699	0	0	0	0	1	0	0	0	2	1
1700	0	0	0	0	0	0	0	0	1	0
1701	0	0	0	0	0	0	0	0	1	1
1702	1	0	0	0	1	0	0	0	1	0
1703	1	0	0	0	1	0	0	0	2	1
1704	0	0	0	0	0	0	0	0	1	1
1705	1	0	0	0	1	0	0	0	4	1
1706	0	0	0	0	0	0	0	0	2	1
1707	0	0	0	0	0	0	0	0	3	1
1708	0	0	0	0	1	0	0	0	1	1
1709	0	0	0	0	0	0	0	0	2	1
1710	0	0	0	0	0	0	0	0	1	3
1711	0	0	0	0	0	0	0	0	3	1
1712	1	0	0	0	0	0	0	1	1	0
1713	1	0	0	0	1	0	0	0	3	2
1714	1	0	0	0	1	0	0	0	2	2
1715	0	0	0	0	0	0	0	0	3	1
1716	0	0	0	0	0	0	0	1	1	1
1717	0	0	0	0	0	0	0	0	3	1
1718	1	0	0	0	0	0	0	0	1	0
1719	2	0	0	0	0	0	0	0	2	0
1720	2	0	0	0	1	0	0	0	1	2
1721	0	0	0	0	0	0	0	1	3	2
1722	1	0	0	0	1	0	0	0	2	1
1723	2	0	0	0	0	1	0	0	2	1
1724	1	0	0	0	0	0	0	0	3	3
1725	0	0	0	0	0	0	0	0	3	2
1726	1	0	0	0	1	0	0	0	2	1
1727	1	0	0	1	1	0	0	0	0	3
1728	1	0	0	0	0	0	0	0	4	0
1729	2	0	0	1	0	0	0	0	1	1
1730	1	0	0	1	0	0	0	0	2	2
1731	1	0	0	0	0	0	0	0	0	2
1732	2	0	0	0	0	0	0	0	1	2
1733	0	0	0	0	0	0	0	1	0	1
1734	1	0	0	0	0	0	0	0	0	1
1735	2	0	0	0	0	0	0	0	2	1
1736	1	0	0	0	0	0	0	0	2	3
1737	0	0	0	0	0	0	0	0	0	3
1738	1	0	0	0	0	0	0	0	0	1
1739	0	0	0	0	0	0	0	1	3	1
1740	0	0	0	0	0	0	0	0	1	2
1741	1	0	0	0	0	0	0	0	2	1
1742	0	0	0	0	0	0	0	0	1	2
1743	2	0	0	0	0	0	0	0	1	1
1744	0	0	0	0	0	0	0	0	1	1
1745	1	1	0	0	0	0	0	1	1	2
1746	1	1	0	0	0	0	0	0	0	2
1747	1	0	0	0	0	0	0	1	0	2
1748	2	0	0	0	0	0	0	1	3	2
1749	1	1	0	0	0	0	0	0	2	2
1750	1	1	0	0	0	0	0	0	1	1
1751	3	0	0	0	0	0	0	0	1	2
1752	1	0	0	0	0	0	0	0	2	3
1753	1	1	0	0	0	0	0	0	2	3
1754	1	0	0	0	0	0	0	0	2	2
1755	1	0	0	0	1	0	0	0	3	2
1756	1	0	0	0	0	0	0	1	2	2
1757	1	0	0	0	0	0	0	1	4	1
1758	1	0	0	0	0	0	0	0	1	3
1759	1	0	0	0	1	0	0	0	1	0
1760	1	0	0	0	0	0	0	0	2	1
1761	2	0	0	0	0	0	0	0	1	3
1762	3	0	0	0	0	0	0	0	2	2
1763	1	0	0	0	0	0	0	0	2	4
1764	1	0	0	0	0	0	0	1	1	0
1765	3	0	0	0	0	0	0	1	1	2
1766	2	0	0	0	0	0	0	0	2	4
1767	3	0	0	0	0	0	0	1	1	5
1768	2	0	0	0	0	0	0	0	0	2
1769	1	0	0	0	0	0	0	1	2	2
1770	2	0	0	0	0	0	0	1	0	2
1771	1	0	0	0	0	0	0	1	0	4
1772	2	0	0	0	0	0	0	1	3	2
1773	1	0	0	0	0	0	0	1	3	2
1774	1	0	0	0	0	0	0	0	1	1
1775	1	0	0	1	0	0	0	1	1	1
1776	0	0	0	0	0	0	0	0	1	3
1777	2	0	0	0	0	1	0	0	1	2
1778	1	0	0	0	0	0	0	0	2	0
1779	1	0	0	0	0	0	0	0	1	4
1780	1	0	0	1	0	0	0	0	2	2
1781	2	0	0	1	0	0	0	1	0	1
1782	0	0	0	0	0	0	0	1	3	1
1783	1	0	0	1	0	0	0	0	1	1
1784	2	0	0	1	0	0	0	1	3	2
1785	1	0	0	1	0	0	0	0	2	1
1786	0	0	0	1	1	0	0	0	1	2
1787	0	0	0	1	0	0	0	0	1	1
1788	2	0	0	0	0	0	0	0	2	1
1789	1	0	0	0	0	0	0	0	1	0
1790	0	0	0	1	1	0	0	0	1	3
1791	0	0	0	0	0	0	0	0	0	0
1792	1	0	0	1	0	0	0	1	1	2
1793	0	0	0	0	0	0	0	1	2	3
1794	0	0	0	1	0	0	0	0	0	3
1795	2	0	0	0	1	0	0	0	1	2
1796	1	0	0	1	0	0	0	1	1	1
1797	2	0	0	1	0	0	0	0	2	1
1798	1	0	0	0	0	0	0	1	1	2
1799	1	0	0	1	0	0	0	0	0	2
1800	0	0	0	1	0	0	0	0	1	0
1801	2	0	0	1	1	0	0	0	0	3
1802	1	0	0	1	0	0	0	0	1	2
1803	2	0	0	0	1	0	0	0	0	0
1804	1	0	0	0	0	0	0	0	1	0
1805	2	0	0	0	0	0	0	0	3	3
1806	1	0	0	1	0	0	0	0	2	1
1807	0	0	0	0	0	0	0	0	0	2
1808	1	0	0	0	0	0	0	1	0	1
1809	0	0	0	1	0	0	0	0	1	1
1810	1	0	0	1	0	0	0	0	0	4
1811	2	0	0	1	0	0	0	0	1	1
1812	2	0	0	0	1	0	0	0	0	1
1813	1	0	0	1	0	0	0	0	1	3
1814	2	0	0	1	0	0	0	0	1	3
1815	1	0	0	1	0	0	0	0	1	1
1816	2	0	0	0	0	0	0	0	1	1
1817	1	0	0	1	0	0	0	0	2	3
1818	2	0	0	1	1	0	0	0	1	2
1819	2	0	0	1	1	0	0	0	2	2
1820	0	0	0	1	0	0	0	1	1	1
1821	2	0	0	0	0	0	0	0	2	0
1822	1	0	0	0	0	0	0	0	2	2
1823	2	0	0	0	0	0	0	1	4	3
1824	3	0	0	0	0	0	0	0	1	2
1825	3	0	0	0	0	0	0	0	2	2
1826	2	0	0	1	1	0	0	0	3	2
1827	0	0	0	0	0	0	0	0	0	3
1828	0	0	0	1	0	0	0	0	1	0
1829	0	0	0	1	0	0	0	1	2	1
1830	1	0	0	0	1	0	0	0	2	1
1831	2	0	0	0	1	0	0	0	0	0
1832	1	0	0	1	0	0	0	0	1	3
1833	1	0	0	1	0	0	0	0	0	2
1834	0	0	0	0	0	0	0	0	2	2
1835	1	0	0	1	0	0	0	0	2	1
1836	1	0	0	1	0	0	0	1	0	1
1837	1	0	0	1	0	0	0	0	2	2
1838	2	0	0	0	0	0	0	1	1	3
1839	1	0	0	1	0	0	0	0	0	1
1840	0	0	0	0	0	0	0	0	1	2
1841	3	0	0	1	0	0	0	1	1	0
1842	2	0	0	1	0	0	0	0	1	3
1843	1	0	0	0	0	0	0	0	1	2
1844	1	0	0	1	0	0	0	0	1	1
1845	1	0	0	1	0	0	0	0	2	2
1846	0	0	0	1	0	0	0	0	2	1
1847	1	0	0	0	0	0	0	0	0	2
1848	0	0	0	1	0	0	0	0	1	3
1849	1	0	0	0	0	0	0	0	2	2
1850	0	0	0	0	0	0	0	0	1	3
1851	1	0	0	0	0	0	0	1	2	1
1852	1	0	0	0	1	0	0	0	2	1
1853	0	1	0	0	0	0	0	0	2	1
1854	1	0	0	1	0	0	0	0	2	2
1855	2	1	0	0	0	0	0	0	3	1
1856	0	0	0	0	0	0	0	0	1	3
1857	1	0	0	1	0	0	0	0	0	0
1858	1	0	0	0	0	0	0	0	1	1
1859	1	1	0	0	0	0	0	0	3	0
1860	1	1	0	0	0	0	0	0	1	1
1861	0	0	0	1	0	0	0	0	1	3
1862	1	0	0	0	0	0	0	0	3	1
1863	2	0	0	1	0	0	0	0	1	2
1864	0	0	0	1	0	1	0	0	2	1
1865	2	0	0	1	0	0	0	0	2	2
1866	0	0	0	1	0	0	0	1	1	1
1867	1	0	0	0	1	0	0	0	1	0
1868	2	0	0	1	0	0	0	0	3	3
1869	0	1	0	1	0	0	0	0	2	1
1870	0	1	0	1	1	0	0	0	2	1
1871	0	1	0	0	0	0	0	1	3	1
1872	1	0	0	0	0	0	0	0	2	0
1873	0	1	0	1	0	0	0	0	2	2
1874	0	0	0	1	0	0	0	1	2	2
1875	0	0	0	0	1	0	0	0	1	2
1876	1	1	0	1	0	0	0	0	3	1
1877	1	0	0	1	0	0	0	0	2	2
1878	1	0	0	0	0	0	0	1	2	2
1879	1	0	0	0	0	0	0	0	2	1
1880	0	1	0	1	0	0	0	1	4	0
1881	0	0	0	0	0	1	0	0	3	3
1882	0	0	0	0	0	0	0	0	0	0
1883	1	0	0	0	0	0	0	0	2	2
1884	1	0	0	0	0	0	0	0	0	2
1885	0	0	0	0	0	0	0	0	1	2
1886	1	0	0	0	1	0	0	0	1	0
1887	1	0	0	0	0	0	0	1	2	1
1888	0	1	0	0	0	0	0	1	2	2
1889	1	1	0	1	0	0	0	0	2	1
1890	1	1	0	1	0	0	0	0	2	2
1891	0	0	0	0	0	0	0	0	3	1
1892	1	0	0	1	1	0	0	0	0	2
1893	1	0	0	0	0	0	0	0	0	1
1894	0	1	0	0	0	0	0	0	2	2
1895	0	0	0	0	0	0	0	0	3	2
1896	1	0	0	0	0	0	0	0	2	0
1897	0	1	0	1	0	0	0	0	2	2
1898	1	0	0	0	1	0	0	0	2	0
1899	0	0	0	1	0	1	0	0	2	1
1900	1	0	0	0	0	0	0	0	4	2
1901	0	1	0	1	0	0	0	0	3	1
1902	0	1	0	1	0	0	0	0	1	0
1903	1	0	0	0	0	0	0	0	2	1
1904	1	0	0	0	0	0	0	0	2	1
1905	0	1	0	0	0	0	0	0	3	2
1906	1	1	0	1	0	0	0	0	2	1
1907	1	0	0	1	0	0	0	0	4	2
1908	1	1	0	1	0	0	0	0	1	1
1909	1	0	0	1	0	0	0	0	1	0
1910	0	1	0	1	0	0	0	0	3	3
1911	0	0	0	1	0	0	0	0	3	0
1912	0	1	0	0	0	0	0	0	1	2
1913	0	0	0	0	0	0	0	0	2	1
1914	1	0	0	0	0	0	0	0	2	0
1915	1	1	0	0	0	0	0	0	1	1
1916	0	0	0	0	0	0	0	0	2	2
1917	2	1	0	1	0	0	0	0	3	0
1918	0	0	0	0	0	0	0	0	2	1
1919	1	1	0	1	0	0	0	0	2	1
1920	1	0	0	0	0	0	0	0	3	1
1921	0	1	0	0	0	0	0	0	0	2
1922	0	0	0	0	0	0	0	0	1	1
1923	1	1	0	1	0	0	0	0	0	0
1924	0	0	0	1	0	0	0	0	3	2
1925	1	0	0	1	0	0	0	0	2	1
1926	0	0	0	1	0	0	0	0	2	2
1927	0	0	0	1	0	0	0	0	2	2
1928	1	0	0	1	0	0	0	0	2	2
1929	0	0	0	1	0	0	0	0	0	1
1930	0	0	0	1	0	0	0	0	3	1
1931	1	0	0	1	0	0	0	0	1	2
1932	0	0	0	1	0	0	0	0	1	1
1933	1	0	0	0	0	1	0	0	2	0
1934	1	0	0	0	0	0	0	0	1	3
1935	0	0	0	0	0	0	0	0	1	2
1936	2	0	0	1	0	0	0	0	0	2
1937	1	0	0	0	0	0	0	0	3	2
1938	1	0	0	1	0	0	0	0	3	2
1939	1	0	0	0	0	0	0	0	1	3
1940	2	0	0	0	0	0	0	0	0	0
1941	2	0	0	1	0	0	0	0	2	2
1942	0	0	0	1	0	0	0	0	2	3
1943	2	0	0	1	0	0	0	0	1	1
1944	2	0	0	0	0	0	0	0	0	1
1945	2	0	0	0	0	0	0	0	2	1
1946	2	0	0	1	0	0	0	0	3	1
1947	1	0	0	1	0	0	0	0	2	0
1948	1	0	0	1	0	0	0	0	2	1
1949	2	0	0	0	0	0	0	0	2	3
1950	0	0	0	1	0	0	0	0	1	2
1951	2	0	0	0	0	0	0	0	3	1
1952	2	0	0	1	0	0	0	0	2	0
1953	1	0	0	1	0	0	0	1	2	0
1954	3	0	0	0	0	0	0	0	2	1
1955	2	0	0	1	0	0	0	0	4	0
1956	1	0	0	1	0	0	0	0	1	0
1957	1	0	0	0	0	0	0	0	0	0
1958	1	0	0	0	0	0	0	0	1	1
1959	2	0	0	0	0	0	0	0	2	1
1960	0	0	0	1	0	0	0	0	0	1
1961	0	0	0	1	0	0	0	0	0	1
1962	0	0	0	1	0	0	0	0	0	1
1963	2	0	0	0	0	0	0	0	2	0
1964	1	0	0	0	0	0	0	0	0	1
1965	1	0	0	0	0	0	0	0	2	2
1966	2	0	0	1	0	0	0	0	2	2
1967	1	0	0	1	0	0	0	0	1	2
1968	0	0	0	1	0	0	0	0	2	3
1969	1	0	0	0	1	0	0	0	1	2
1970	1	0	0	0	0	0	0	0	1	0
1971	2	0	0	1	0	0	0	0	2	1
1972	0	0	0	1	1	0	0	0	0	0
1973	2	0	0	1	0	0	0	0	1	0
1974	1	0	0	0	0	0	0	0	0	0
1975	1	0	0	0	1	0	0	0	0	2
1976	1	0	0	0	0	0	0	0	0	2
1977	2	0	0	1	0	0	0	0	3	1
1978	1	0	0	1	0	0	1	0	0	3
1979	1	0	0	1	0	0	0	0	1	1
1980	2	0	0	0	0	0	0	0	2	2
1981	2	0	0	0	0	0	0	0	1	4
1982	2	0	0	1	0	0	0	0	3	2
1983	0	0	0	0	0	0	1	0	1	1
1984	2	0	0	0	0	0	0	0	1	2
1985	1	0	0	1	0	0	0	0	2	2
1986	0	0	0	1	1	0	0	0	2	1
1987	0	0	0	1	0	0	0	0	2	2
1988	0	0	0	1	0	0	0	0	1	2
1989	1	0	0	1	0	0	0	0	0	1
1990	2	1	0	1	0	0	0	0	0	0
1991	1	0	0	0	0	0	0	0	3	2
1992	2	0	0	0	0	0	0	0	3	1
1993	1	1	0	1	0	0	0	0	3	1
1994	0	0	0	0	0	0	0	0	2	2
1995	0	1	0	1	0	0	0	0	3	0
1996	2	0	0	1	0	0	0	0	1	4
1997	1	0	0	1	0	0	0	0	2	1
1998	0	0	0	1	0	0	0	0	3	0
[truncated: 504 more rows]

## Sheet: H-bonds_statistics_3_sets
Set A
	3SJT (ARG1)	Average H-bonds	SD(+/-)	4HZE (ARG2)	Average H-bonds	SD(+/-)
	Candesartan	0.4152	0.561191	Candesartan	0.1676	0.411312
	Irbesartan	0.3256	0.505655	Irbesartan	0.2172	0.468735
	Codeine	0.0744	0.294108	Codeine	0.33	0.504779
	Isavucanazole	0.032	0.176035	Isavucanazole	0.1744	0.388902
	Metformin	2.2356	1.14009	Metformin	2.7408	1.25915
Set B
	3SJT (ARG1)	Average H-bonds	SD(+/-)	4HZE (ARG2)	Average H-bonds	SD(+/-)
	Candesartan	0.4668	0.649513	Candesartan	0.2024	0.433485
	Irbesartan	0.0832	0.307759	Irbesartan	0.0204	0.141392
	Codeine	0.1204	0.344603	Codeine	0.3464	0.585273
	Isavucanazole	0.104	0.318158	Isavucanazole	0.0296	0.169515
	Metformin	2.0108	0.957418	Metformin	1.9648	0.979359
Set C
	3SJT (ARG1)	Average H-bonds	SD(+/-)	4HZE (ARG2)	Average H-bonds	SD(+/-)
	Candesartan	0.584	0.652928	Candesartan	0.1632	0.398785
	Irbesartan	0.0828	0.279956	Irbesartan	0.0108	0.114405
	Codeine	0.128	0.334157	Codeine	0.118	0.339591
	Isavucanazole	0.0684	0.255632	Isavucanazole	0.056	0.231701
	Metformin	1.63	0.981369	Metformin	1.6572	1.01395
