# Supplementary material for: Virtual Screening for FDA-Approved Drugs That Selectively Inhibit Arginase Type 1 and 2
Source: Molecules. 2022 Aug 12;27(16):5134. doi: 10.3390/molecules27165134 (PMC9416497; doi:10.3390/molecules27165134)
Supplement: Supplementary file 1 [file molecules-27-05134-s001.zip › Table S7.xlsx]

## Sheet: candesartan
Time (ns)	protein_ARG1	LIG_Candesartan	Time (ns)	protein_ARG2	LIG_Candesartan
0.02	0.693551	0.704622	0.02	0.670869	0.864801
0.04	0.951948	1.1746	0.04	0.724556	2.12279
0.06	0.987803	0.727803	0.06	0.76848	1.2216
0.08	1.21043	0.672239	0.08	0.794804	1.74224
0.1	1.11582	0.68257	0.1	0.950713	1.82291
0.12	1.1678	0.748624	0.12	0.944481	1.95968
0.14	1.37289	1.03474	0.14	1.0339	2.21816
0.16	1.19325	0.753181	0.16	1.01482	2.02416
0.18	1.20972	0.974888	0.18	0.983441	2.09426
0.2	1.31946	0.720681	0.2	1.11527	2.18834
0.22	1.4976	0.621031	0.22	1.02421	2.26415
0.24	1.40639	0.580295	0.24	1.17098	2.38995
0.26	1.26732	0.958704	0.26	1.14727	2.39498
0.28	1.3458	1.58108	0.28	1.18462	2.50206
0.3	1.43664	2.05984	0.3	1.15827	2.57869
0.32	1.46472	2.2489	0.32	1.27414	2.38503
0.34	1.5028	2.27642	0.34	1.27256	2.38619
0.36	1.52077	2.24819	0.36	1.18033	2.50258
0.38	1.54004	2.78643	0.38	1.29405	2.47603
0.4	1.60875	2.38663	0.4	1.21568	2.33845
0.42	1.56088	2.66632	0.42	1.11736	2.35482
0.44	1.53428	2.6928	0.44	1.14184	2.48133
0.46	1.67624	2.43808	0.46	1.1812	2.58697
0.48	1.55557	3.21258	0.48	1.14138	2.34333
0.5	1.57929	2.87992	0.5	1.133	2.4915
0.52	1.56378	2.98599	0.52	1.15318	2.36378
0.54	1.56197	2.76501	0.54	1.1129	2.38989
0.56	1.38829	3.0186	0.56	1.16883	2.12401
0.58	1.57836	3.33971	0.58	1.11593	2.427
0.6	1.64225	2.71961	0.6	1.13852	2.19269
0.62	1.72596	2.60826	0.62	1.14152	2.6744
0.64	1.80037	2.84818	0.64	1.05621	2.62245
0.66	1.99123	2.51244	0.66	1.26217	2.40051
0.68	1.85447	2.44486	0.68	1.17574	2.29224
0.7	1.86949	3.07518	0.7	1.10812	2.20962
0.72	1.9822	2.65032	0.72	1.18915	2.49142
0.74	2.02733	2.55151	0.74	1.14109	2.42236
0.76	2.11701	2.41698	0.76	1.18907	2.13667
0.78	2.07223	2.92212	0.78	1.14188	2.63811
0.8	1.88782	3.24619	0.8	1.1646	2.57657
0.82	1.979	2.85515	0.82	1.16347	2.51308
0.84	1.96162	2.68823	0.84	1.22127	2.49263
0.86	2.09761	2.85558	0.86	1.23229	2.41747
0.88	2.11685	2.42323	0.88	1.17793	2.61005
0.9	2.16975	2.63407	0.9	1.24697	2.93464
0.92	2.15624	2.89559	0.92	1.17541	2.68743
0.94	2.1002	2.82976	0.94	1.20748	2.3955
0.96	2.17606	3.05955	0.96	1.24251	2.55617
0.98	1.96975	2.92064	0.98	1.18543	2.55768
1	1.96834	2.49934	1	1.20884	2.62067
1.02	2.16211	3.11908	1.02	1.21633	2.7155
1.04	2.14643	2.71973	1.04	1.22703	2.59143
1.06	2.1404	2.56099	1.06	1.25839	2.46891
1.08	2.2939	2.70328	1.08	1.27372	2.41136
1.1	2.35048	2.9249	1.1	1.30406	2.37129
1.12	2.6165	2.90236	1.12	1.26802	2.03947
1.14	2.42711	3.38193	1.14	1.22615	2.2379
1.16	2.40872	3.2576	1.16	1.17554	2.44225
1.18	2.28346	3.2731	1.18	1.40711	2.53392
1.2	2.22458	2.82884	1.2	1.43617	2.55936
1.22	2.29442	2.73362	1.22	1.36003	2.32591
1.24	2.37274	2.87434	1.24	1.44761	2.45009
1.26	2.46119	2.99642	1.26	1.35547	2.14293
1.28	2.53438	2.73233	1.28	1.41168	1.88073
1.3	2.70296	2.79125	1.3	1.47721	2.16526
1.32	2.62874	2.38076	1.32	1.36525	2.40517
1.34	2.72649	2.65271	1.34	1.33322	1.90151
1.36	2.71514	2.65696	1.36	1.43044	2.23822
1.38	2.61862	2.98665	1.38	1.38007	2.43041
1.4	2.84313	3.12632	1.4	1.22605	2.13128
1.42	2.81455	3.14147	1.42	1.31347	2.19577
1.44	2.87036	3.36775	1.44	1.30332	2.16163
1.46	2.66182	3.18694	1.46	1.2522	2.23424
1.48	2.59557	2.55884	1.48	1.25287	2.28506
1.5	2.76377	3.30718	1.5	1.37259	2.1401
1.52	2.73889	3.17938	1.52	1.35658	1.91403
1.54	2.57711	3.17018	1.54	1.46804	2.19427
1.56	2.39192	3.08981	1.56	1.32326	2.34113
1.58	2.51436	2.6931	1.58	1.30468	2.09235
1.6	2.38576	2.79149	1.6	1.49113	2.19842
1.62	2.52885	2.63541	1.62	1.37221	2.5703
1.64	2.5936	2.54976	1.64	1.35212	2.34982
1.66	2.72956	2.24195	1.66	1.38454	2.10979
1.68	2.74471	2.39251	1.68	1.41802	1.93448
1.7	2.54923	2.38387	1.7	1.3972	2.62046
1.72	2.49529	2.89881	1.72	1.3696	2.6426
1.74	2.56334	3.00608	1.74	1.39053	2.4514
1.76	2.49232	2.68745	1.76	1.3704	2.0315
1.78	2.47016	2.90266	1.78	1.45699	1.77235
1.8	2.52091	2.99916	1.8	1.41873	2.08437
1.82	2.61174	3.1017	1.82	1.55443	1.98415
1.84	2.7254	2.50216	1.84	1.5229	1.63745
1.86	2.75075	2.91788	1.86	1.64367	1.83259
1.88	2.61871	3.10567	1.88	1.60323	1.58901
1.9	2.60372	3.07157	1.9	1.56153	2.10985
1.92	2.62883	2.72726	1.92	1.46241	1.89988
1.94	2.24964	2.62306	1.94	1.3888	2.04737
1.96	2.2978	2.94661	1.96	1.49548	2.01805
1.98	2.30537	2.88452	1.98	1.35944	1.80547
2	2.38724	2.5665	2	1.47586	1.94152
2.02	2.46293	2.89354	2.02	1.39734	1.70405
2.04	2.40871	2.42994	2.04	1.4247	1.73968
2.06	2.58204	2.60141	2.06	1.38076	1.82313
2.08	2.57096	2.59742	2.08	1.40368	2.11478
2.1	2.60458	2.67253	2.1	1.40482	2.24443
2.12	2.42829	2.84154	2.12	1.52945	1.99562
2.14	2.45964	2.70577	2.14	1.46924	2.38673
2.16	2.63578	2.58532	2.16	1.39536	2.20679
2.18	2.75386	2.60989	2.18	1.46977	2.11992
2.2	2.58712	2.74702	2.2	1.52889	2.27146
2.22	2.57054	2.60939	2.22	1.57256	2.26286
2.24	2.54323	2.76023	2.24	1.52677	2.14784
2.26	2.63757	2.46298	2.26	1.50926	2.39473
2.28	2.42757	2.65078	2.28	1.47219	2.50288
2.3	2.47431	2.69108	2.3	1.48892	2.04758
2.32	2.60056	2.59258	2.32	1.41771	2.31078
2.34	2.54046	3.10302	2.34	1.42541	2.16244
2.36	2.6089	2.75377	2.36	1.42357	2.23534
2.38	2.55052	2.91276	2.38	1.4361	2.46323
2.4	2.52494	2.67989	2.4	1.43355	2.45145
2.42	2.69851	2.48592	2.42	1.43917	2.09113
2.44	2.7054	2.37653	2.44	1.47267	2.0019
2.46	2.49647	2.94361	2.46	1.54767	1.83821
2.48	2.57557	2.78625	2.48	1.64638	2.04026
2.5	2.71609	2.93303	2.5	1.60475	2.05649
2.52	2.61897	2.63302	2.52	1.57211	2.19324
2.54	2.83565	2.71852	2.54	1.48321	2.14167
2.56	2.60854	2.72405	2.56	1.50592	2.23273
2.58	2.72744	2.70031	2.58	1.52537	1.85701
2.6	2.88758	3.07293	2.6	1.61227	1.9488
2.62	2.91312	2.83548	2.62	1.60737	2.0037
2.64	3.0064	3.05478	2.64	1.68937	1.88484
2.66	3.2507	3.08536	2.66	1.67432	2.32802
2.68	3.04664	2.86757	2.68	1.8065	1.91541
2.7	3.12023	2.68944	2.7	1.71402	1.89439
2.72	3.21818	2.77832	2.72	1.83688	2.47328
2.74	3.17009	2.65934	2.74	1.80286	2.61926
2.76	3.12673	2.71805	2.76	1.80766	2.5332
2.78	3.26641	2.62102	2.78	1.76009	2.55335
2.8	3.188	2.48754	2.8	1.68218	2.08708
2.82	3.34084	2.44044	2.82	1.67726	2.01614
2.84	3.16912	2.47657	2.84	1.70484	2.24975
2.86	3.14099	2.58087	2.86	1.69513	2.75099
2.88	2.96175	2.79039	2.88	1.74769	2.43864
2.9	2.88276	2.89065	2.9	1.67057	2.40115
2.92	3.02691	2.58411	2.92	1.65575	2.67046
2.94	2.88898	2.74088	2.94	1.62061	2.30412
2.96	3.02399	2.99412	2.96	1.6791	1.68779
2.98	3.13451	2.85909	2.98	1.74775	2.02071
3	3.05544	2.87099	3	1.62484	2.40739
3.02	3.16986	2.81042	3.02	1.57486	2.19544
3.04	3.07668	2.90734	3.04	1.60142	2.26809
3.06	3.01797	2.55701	3.06	1.64434	2.20645
3.08	3.00286	3.11243	3.08	1.72456	2.80671
3.1	3.10794	2.51738	3.1	1.73313	2.86888
3.12	3.05727	2.8127	3.12	1.65798	2.70439
3.14	3.01557	2.69227	3.14	1.67261	2.27354
3.16	2.82465	2.94896	3.16	1.63816	2.53305
3.18	3.12561	2.63244	3.18	1.74568	2.64396
3.2	3.34846	2.35215	3.2	1.65466	2.07071
3.22	3.44537	2.96245	3.22	1.62178	2.02032
3.24	3.51027	2.54808	3.24	1.67594	2.1611
3.26	3.57912	2.76835	3.26	1.59596	1.90599
3.28	3.57619	2.8176	3.28	1.62301	2.23277
3.3	3.64898	3.24453	3.3	1.65462	2.05215
3.32	3.74961	2.86262	3.32	1.7197	1.90202
3.34	3.69837	2.74698	3.34	1.61255	2.15118
3.36	3.57949	2.79145	3.36	1.69652	1.80895
3.38	3.6938	2.88914	3.38	1.63089	2.19998
3.4	3.69593	2.62807	3.4	1.75104	1.92575
3.42	3.62939	2.68758	3.42	1.6688	1.92638
3.44	3.83452	2.85515	3.44	1.67749	1.96498
3.46	3.77153	2.8177	3.46	1.61344	1.74874
3.48	3.65262	2.78794	3.48	1.66154	2.2346
3.5	3.63496	2.86754	3.5	1.67996	1.88312
3.52	3.51392	2.91239	3.52	1.6785	2.02619
3.54	3.52095	2.95314	3.54	1.69533	1.78966
3.56	3.63859	2.95087	3.56	1.59633	1.68885
3.58	3.70476	2.92561	3.58	1.70828	1.89474
3.6	3.64475	3.21579	3.6	1.82686	1.73818
3.62	3.82623	2.94094	3.62	1.73224	1.89985
3.64	3.78557	3.07416	3.64	1.75589	2.38782
3.66	3.76799	3.11815	3.66	1.70458	2.1033
3.68	3.87316	2.75578	3.68	1.672	2.32996
3.7	3.7208	2.97422	3.7	1.67283	1.98916
3.72	3.61447	2.5655	3.72	1.53264	1.95767
3.74	3.68243	2.9015	3.74	1.57834	2.131
3.76	3.70721	2.83867	3.76	1.63269	1.85236
3.78	3.58345	2.72106	3.78	1.61362	2.42947
3.8	3.74746	2.64559	3.8	1.66519	2.08584
3.82	3.73026	2.92239	3.82	1.62322	1.69244
3.84	3.7318	2.85881	3.84	1.61951	1.98136
3.86	3.72706	3.00153	3.86	1.54646	2.11717
3.88	3.73429	3.08563	3.88	1.61797	2.13969
3.9	3.71855	2.4803	3.9	1.60985	2.00401
3.92	3.8071	2.93791	3.92	1.67579	2.44229
3.94	3.67983	2.86914	3.94	1.67771	1.99445
3.96	3.9074	2.90368	3.96	1.69162	1.87038
3.98	3.79598	2.56818	3.98	1.63764	2.49689
4	3.82972	2.66483	4	1.65747	1.90867
4.02	3.76607	2.85679	4.02	1.69679	2.03422
4.04	3.75851	2.95773	4.04	1.71461	2.10783
4.06	3.72983	2.61678	4.06	1.65757	1.98558
4.08	3.66778	3.02838	4.08	1.58077	2.37095
4.1	3.64773	3.06798	4.1	1.71329	2.20318
4.12	3.6361	2.75975	4.12	1.83335	1.91843
4.14	3.60615	2.9025	4.14	1.71031	2.13373
4.16	3.69349	2.89503	4.16	1.69982	2.06061
4.18	3.79907	2.70369	4.18	1.78237	2.36587
4.2	3.71982	2.67999	4.2	1.7479	2.07506
4.22	3.79368	2.98945	4.22	1.66588	1.90338
4.24	3.74816	2.94529	4.24	1.7373	1.75914
4.26	3.84201	3.06476	4.26	1.8039	2.04076
4.28	3.90299	2.77304	4.28	1.78849	2.65936
4.3	3.72682	2.91228	4.3	1.78605	2.551
4.32	3.86203	2.55619	4.32	1.68347	1.9217
4.34	3.8506	2.75799	4.34	1.63119	2.31136
4.36	3.91594	2.55803	4.36	1.76006	2.51171
4.38	3.87154	2.32753	4.38	1.72533	1.94374
4.4	3.84235	2.94302	4.4	1.66744	2.23435
4.42	3.96354	3.0359	4.42	1.72485	2.12573
4.44	3.78776	2.69187	4.44	1.65072	2.25325
4.46	3.7274	2.81581	4.46	1.69696	2.33556
4.48	3.77661	3.13371	4.48	1.71804	2.42414
4.5	3.82885	2.99018	4.5	1.68036	2.25008
4.52	3.83729	3.12915	4.52	1.71799	2.44562
4.54	3.95872	2.85187	4.54	1.69861	2.70361
4.56	3.84928	3.00096	4.56	1.60663	2.33098
4.58	3.76417	2.92675	4.58	1.70036	2.77841
4.6	3.79314	2.80713	4.6	1.70314	2.46127
4.62	3.77552	2.8706	4.62	1.74399	2.5352
4.64	3.76638	2.77866	4.64	1.65675	2.76317
4.66	3.71481	3.00133	4.66	1.60423	2.26629
4.68	3.62206	2.788	4.68	1.66147	2.24464
4.7	3.6599	2.8449	4.7	1.65278	2.06421
4.72	3.5695	2.93497	4.72	1.56326	2.28708
4.74	3.74036	2.74033	4.74	1.69122	2.19288
4.76	3.65369	2.65358	4.76	1.56227	2.37158
4.78	3.64267	3.16499	4.78	1.64262	2.23172
4.8	3.63594	2.93277	4.8	1.67052	2.3088
4.82	3.74682	2.80345	4.82	1.62407	2.23752
4.84	3.69657	2.68716	4.84	1.67302	2.15306
4.86	3.7589	2.68185	4.86	1.6541	1.94624
4.88	3.72471	2.33068	4.88	1.56861	2.40219
4.9	3.73701	2.72686	4.9	1.66881	1.9962
4.92	3.71543	2.84029	4.92	1.73539	2.02084
4.94	3.68505	2.95196	4.94	1.62873	1.94299
4.96	3.73803	3.15036	4.96	1.58727	2.22704
4.98	3.78625	3.36214	4.98	1.59365	2.45581
5	3.67981	3.0792	5	1.4672	2.37153
5.02	3.50175	3.05186	5.02	1.58829	2.45235
5.04	3.59554	2.95179	5.04	1.53785	1.95282
5.06	3.54963	2.86901	5.06	1.64484	2.21878
5.08	3.62564	2.97723	5.08	1.57109	2.10525
5.1	3.60608	2.8789	5.1	1.65423	2.50048
5.12	3.62848	2.79563	5.12	1.58207	2.26583
5.14	3.59315	3.33665	5.14	1.6436	2.48724
5.16	3.69774	2.95517	5.16	1.71405	2.57308
5.18	3.59582	2.82002	5.18	1.69827	2.58694
5.2	3.659	2.5598	5.2	1.67478	2.42556
5.22	3.65186	3.09287	5.22	1.59993	2.10314
5.24	3.69084	3.09104	5.24	1.69005	2.39435
5.26	3.55624	3.15395	5.26	1.62639	2.47609
5.28	3.58677	3.06563	5.28	1.82696	2.4238
5.3	3.63809	2.91043	5.3	1.70957	2.3983
5.32	3.60807	3.00193	5.32	1.73917	2.32252
5.34	3.74595	3.03658	5.34	1.67474	2.59604
5.36	3.59037	3.1088	5.36	1.62857	2.41671
5.38	3.62745	2.94969	5.38	1.61103	2.67753
5.4	3.67091	3.02045	5.4	1.62395	2.51873
5.42	3.65634	3.06751	5.42	1.59783	2.48587
5.44	3.50794	2.81605	5.44	1.58735	2.4228
5.46	3.4873	2.74143	5.46	1.6117	2.12112
5.48	3.50081	2.97943	5.48	1.52935	2.44438
5.5	3.33947	3.16297	5.5	1.72869	2.05574
5.52	3.51588	3.05243	5.52	1.67196	1.82894
5.54	3.48934	3.16804	5.54	1.62451	1.98396
5.56	3.42582	3.07199	5.56	1.59501	2.09994
5.58	3.61646	3.14886	5.58	1.64656	2.21998
5.6	3.56719	3.41619	5.6	1.65881	2.34013
5.62	3.46925	3.6278	5.62	1.6976	1.80805
5.64	3.55222	3.24287	5.64	1.67383	2.17739
5.66	3.65871	3.61987	5.66	1.53985	2.63002
5.68	3.60458	3.33768	5.68	1.63388	2.07917
5.7	3.5298	3.3422	5.7	1.69368	1.96853
5.72	3.57642	3.44394	5.72	1.73125	2.23737
5.74	3.55879	3.34763	5.74	1.67802	1.86909
5.76	3.6352	3.10633	5.76	1.57252	2.36315
5.78	3.66871	3.04225	5.78	1.68565	1.70684
5.8	3.72836	3.28103	5.8	1.69142	2.19132
5.82	3.68847	3.18571	5.82	1.6445	2.15544
5.84	3.71103	3.02255	5.84	1.48287	2.45592
5.86	3.6335	3.20355	5.86	1.53121	2.19767
5.88	3.64302	3.26832	5.88	1.59043	2.1028
5.9	3.59319	3.4615	5.9	1.46199	2.1528
5.92	3.58184	3.34106	5.92	1.51773	2.08261
5.94	3.58989	3.34774	5.94	1.55716	2.10748
5.96	3.43894	3.4362	5.96	1.46484	2.2931
5.98	3.55549	3.29109	5.98	1.50275	2.16269
6	3.51955	3.71866	6	1.52449	2.12786
6.02	3.44997	4.01916	6.02	1.49293	2.01838
6.04	3.52058	3.80312	6.04	1.47207	2.34705
6.06	3.59585	3.79644	6.06	1.53972	2.26914
6.08	3.65908	3.81139	6.08	1.51644	2.5259
6.1	3.67645	3.93607	6.1	1.48026	2.47381
6.12	3.602	3.90048	6.12	1.5177	2.09314
6.14	3.57055	4.00729	6.14	1.65535	2.39005
6.16	3.58985	3.91353	6.16	1.60247	2.32791
6.18	3.52511	3.96407	6.18	1.65383	2.17509
6.2	3.59046	3.97077	6.2	1.55101	2.04717
6.22	3.65391	3.99919	6.22	1.61553	2.25933
6.24	3.63828	3.85221	6.24	1.54035	1.98675
6.26	3.6893	3.63782	6.26	1.60514	2.1692
6.28	3.63132	3.36527	6.28	1.5811	1.99139
6.3	3.52758	3.30708	6.3	1.50776	2.27067
6.32	3.69839	3.04791	6.32	1.52063	2.02108
6.34	3.56934	3.41863	6.34	1.47201	2.6872
6.36	3.64085	3.19336	6.36	1.54286	2.26277
6.38	3.71538	3.28416	6.38	1.50453	2.26666
6.4	3.5728	3.51926	6.4	1.69668	1.96491
6.42	3.55673	3.88882	6.42	1.70297	2.21047
6.44	3.60357	3.78323	6.44	1.64002	2.21988
6.46	3.61882	3.64749	6.46	1.60382	2.04237
6.48	3.60426	3.53668	6.48	1.58078	2.04737
6.5	3.56811	3.78178	6.5	1.51273	2.25738
6.52	3.61483	3.76554	6.52	1.72218	2.44156
6.54	3.67322	3.61604	6.54	1.66627	1.8187
6.56	3.61087	3.73506	6.56	1.63416	2.14321
6.58	3.57225	3.58205	6.58	1.69798	2.70789
6.6	3.52047	3.37798	6.6	1.721	2.07901
6.62	3.49734	3.58305	6.62	1.70104	2.51901
6.64	3.58049	3.61794	6.64	1.59955	1.46691
6.66	3.57922	3.65362	6.66	1.71466	2.11552
6.68	3.60438	3.45867	6.68	1.65607	2.10935
6.7	3.46733	3.76379	6.7	1.66825	1.9098
6.72	3.51697	3.7735	6.72	1.7183	1.91965
6.74	3.63968	3.94365	6.74	1.752	2.1694
6.76	3.55252	3.80182	6.76	1.68482	2.50828
6.78	3.53282	3.48714	6.78	1.61671	2.08046
6.8	3.519	3.67884	6.8	1.58246	2.02496
6.82	3.50886	3.9456	6.82	1.59898	1.93966
6.84	3.49289	3.96736	6.84	1.63664	1.94878
6.86	3.44408	3.82044	6.86	1.56266	2.02372
6.88	3.57303	3.92098	6.88	1.55563	1.92602
6.9	3.60467	3.96815	6.9	1.5556	1.97273
6.92	3.57397	3.84605	6.92	1.5869	2.11381
6.94	3.58015	3.90902	6.94	1.62263	2.08987
6.96	3.61673	3.78664	6.96	1.60623	2.20734
6.98	3.59559	3.90832	6.98	1.72651	2.11412
7	3.6193	3.86842	7	1.55389	2.34112
7.02	3.49274	3.95287	7.02	1.58134	2.45802
7.04	3.52744	3.89363	7.04	1.64554	2.40152
7.06	3.58063	4.08022	7.06	1.77548	2.15098
7.08	3.62651	4.06618	7.08	1.74348	1.95499
7.1	3.5516	3.95617	7.1	1.71705	2.01221
7.12	3.51524	3.85195	7.12	1.64363	2.2583
7.14	3.55693	3.97201	7.14	1.62936	1.96513
7.16	3.63174	4.28002	7.16	1.67396	2.15814
7.18	3.62176	4.03639	7.18	1.75954	2.15096
7.2	3.57685	4.0124	7.2	1.72099	2.19503
7.22	3.55838	3.81787	7.22	1.6787	2.26163
7.24	3.66416	3.94199	7.24	1.68283	2.32256
7.26	3.75289	3.97628	7.26	1.77351	2.19802
7.28	3.47314	3.8456	7.28	1.80201	2.33298
7.3	3.57177	3.90804	7.3	1.74812	2.42835
7.32	3.50048	3.73674	7.32	1.77813	2.47208
7.34	3.57314	3.98619	7.34	1.64367	2.58598
7.36	3.50452	4.04824	7.36	1.65122	2.62359
7.38	3.59476	3.94965	7.38	1.56346	2.3572
7.4	3.48104	3.84242	7.4	1.5418	2.02301
7.42	3.41741	3.69307	7.42	1.65759	2.2628
7.44	3.52406	3.9827	7.44	1.62426	2.5063
7.46	3.65805	3.86017	7.46	1.7158	2.44612
7.48	3.51368	4.06243	7.48	1.53948	2.40718
7.5	3.61276	3.84801	7.5	1.59087	2.24444
7.52	3.53685	3.90448	7.52	1.58277	2.19305
7.54	3.60258	3.97027	7.54	1.60422	1.92182
7.56	3.63446	3.7082	7.56	1.70673	2.20117
7.58	3.62275	3.90732	7.58	1.64871	2.23345
7.6	3.4994	3.96871	7.6	1.72008	2.13016
7.62	3.57493	4.14145	7.62	1.71416	2.4597
7.64	3.57391	3.95218	7.64	1.52759	2.33043
7.66	3.58104	3.9483	7.66	1.60718	2.30796
7.68	3.465	4.02907	7.68	1.6657	2.66415
7.7	3.57152	4.12134	7.7	1.67698	2.00797
7.72	3.62263	4.00031	7.72	1.66593	2.28498
7.74	3.57169	3.91764	7.74	1.62443	2.27811
7.76	3.59798	3.99794	7.76	1.58242	1.81496
7.78	3.59247	4.0169	7.78	1.67877	2.31201
7.8	3.68815	3.76068	7.8	1.64359	1.88735
7.82	3.67536	4.00752	7.82	1.58537	2.51257
7.84	3.73259	4.11228	7.84	1.52595	2.09446
7.86	3.7366	4.10725	7.86	1.57214	2.0933
7.88	3.69801	4.12779	7.88	1.57815	1.88641
7.9	3.70196	3.9252	7.9	1.62266	2.11635
7.92	3.64396	3.8179	7.92	1.68418	2.29335
7.94	3.66103	3.87568	7.94	1.68722	2.2431
7.96	3.71156	3.84398	7.96	1.72781	2.54529
7.98	3.71643	3.48342	7.98	1.68889	2.53612
8	3.69919	3.98596	8	1.75645	2.39464
8.02	3.63427	3.53977	8.02	1.74583	2.15678
8.04	3.79298	3.84904	8.04	1.72717	2.13613
8.06	3.8043	3.8897	8.06	1.70487	2.118
8.08	3.72325	3.9369	8.08	1.71356	2.12386
8.1	3.65835	3.98194	8.1	1.70341	2.1396
8.12	3.68387	4.08774	8.12	1.63666	2.10606
8.14	3.68132	3.74093	8.14	1.65115	2.11528
8.16	3.71837	3.98539	8.16	1.61322	2.24016
8.18	3.65998	3.7451	8.18	1.5901	1.98724
8.2	3.73553	3.49913	8.2	1.65747	2.31017
8.22	3.67013	3.63586	8.22	1.59306	2.05901
8.24	3.72238	3.6316	8.24	1.66281	1.78328
8.26	3.69644	3.67551	8.26	1.74611	1.95041
8.28	3.76894	3.3553	8.28	1.72256	1.77552
8.3	3.78169	3.56934	8.3	1.66554	2.19125
8.32	3.73252	3.47832	8.32	1.65237	2.21128
8.34	3.7313	3.56756	8.34	1.76338	2.1621
8.36	3.7874	3.76116	8.36	1.71151	2.16762
8.38	3.76065	3.95791	8.38	1.7187	2.32633
8.4	3.70948	3.91099	8.4	1.74558	2.16086
8.42	3.76245	3.89383	8.42	1.79761	2.46863
8.44	3.78164	3.41562	8.44	1.78048	2.08099
8.46	3.73801	3.66086	8.46	1.7009	2.24508
8.48	3.74129	3.9342	8.48	1.72145	2.32975
8.5	3.71128	3.89151	8.5	1.74543	2.27694
8.52	3.60757	4.09086	8.52	1.69229	2.16918
8.54	3.58444	3.9005	8.54	1.7129	2.26553
8.56	3.60621	4.02399	8.56	1.72067	1.88168
8.58	3.59073	3.93646	8.58	1.72115	1.98565
8.6	3.53961	3.92742	8.6	1.759	2.27122
8.62	3.56443	3.85218	8.62	1.69484	2.11459
8.64	3.56929	4.05385	8.64	1.72542	2.52823
8.66	3.64	3.98202	8.66	1.6586	2.23243
8.68	3.53693	4.07023	8.68	1.56898	2.36104
8.7	3.58739	4.11094	8.7	1.64658	1.97428
8.72	3.62463	4.07386	8.72	1.64468	2.00777
8.74	3.60057	4.06797	8.74	1.71608	2.18485
8.76	3.47574	4.02341	8.76	1.67946	2.63493
8.78	3.58597	4.02226	8.78	1.69134	2.33579
8.8	3.47215	3.99045	8.8	1.72138	2.40014
8.82	3.58509	3.93939	8.82	1.66808	2.07061
8.84	3.58527	3.99201	8.84	1.69564	2.60107
8.86	3.51196	4.04265	8.86	1.71039	2.21402
8.88	3.62702	3.9406	8.88	1.70981	2.38149
8.9	3.50815	4.0312	8.9	1.69329	2.49417
8.92	3.51781	4.06739	8.92	1.69406	2.39638
8.94	3.53068	3.97419	8.94	1.63219	2.54248
8.96	3.49429	4.00318	8.96	1.70231	2.22096
8.98	3.48889	3.89243	8.98	1.75806	2.07051
9	3.61783	4.00714	9	1.77168	2.12333
9.02	3.60833	3.96762	9.02	1.64506	1.82188
9.04	3.60455	4.01751	9.04	1.76796	2.53366
9.06	3.57586	4.00076	9.06	1.70157	2.35193
9.08	3.63632	4.06826	9.08	1.72137	1.98683
9.1	3.63348	3.68427	9.1	1.71626	2.15559
9.12	3.60181	3.52407	9.12	1.65056	1.62649
9.14	3.62259	3.40162	9.14	1.72208	1.66008
9.16	3.65223	3.899	9.16	1.72741	1.77697
9.18	3.63408	3.92471	9.18	1.69495	1.39527
9.2	3.71747	4.04633	9.2	1.68272	1.45663
9.22	3.67658	4.03685	9.22	1.61938	1.74949
9.24	3.6232	4.05653	9.24	1.67969	1.50496
9.26	3.6512	3.96147	9.26	1.79741	2.07065
9.28	3.63216	3.99161	9.28	1.8288	1.7672
9.3	3.63526	3.89447	9.3	1.70501	1.64172
9.32	3.53356	3.68253	9.32	1.66579	1.53558
9.34	3.4729	3.33365	9.34	1.6871	1.51089
9.36	3.60642	3.28672	9.36	1.73465	1.4911
9.38	3.55296	3.18066	9.38	1.66049	1.45188
9.4	3.58229	3.70563	9.4	1.59813	1.57504
9.42	3.63346	4.00353	9.42	1.66153	1.2515
9.44	3.61307	4.00985	9.44	1.7271	1.33219
9.46	3.55131	4.00398	9.46	1.77231	1.46892
9.48	3.57174	3.86143	9.48	1.73253	1.8159
9.5	3.63077	4.14896	9.5	1.82253	1.80232
9.52	3.60323	3.99849	9.52	1.77309	2.35048
9.54	3.54948	4.03211	9.54	1.69812	1.86811
9.56	3.55036	3.96695	9.56	1.73239	2.20116
9.58	3.54478	4.10641	9.58	1.69526	2.02979
9.6	3.62324	4.00807	9.6	1.66173	1.68937
9.62	3.64829	4.08383	9.62	1.81339	1.50007
9.64	3.53833	4.19452	9.64	1.72785	1.47088
9.66	3.55135	4.04458	9.66	1.77037	1.53151
9.68	3.49861	4.07608	9.68	1.68632	1.53748
9.7	3.55904	4.07209	9.7	1.77831	1.90366
9.72	3.53219	4.01821	9.72	1.86771	1.59829
9.74	3.67812	3.72542	9.74	1.88584	1.85195
9.76	3.59732	3.94532	9.76	1.99641	1.56701
9.78	3.65477	3.99503	9.78	1.87415	1.33723
9.8	3.55705	4.13807	9.8	1.90139	1.20281
9.82	3.55998	3.91906	9.82	2.01138	1.28688
9.84	3.61079	4.12975	9.84	1.76667	1.50437
9.86	3.58914	3.92351	9.86	1.82375	1.2693
9.88	3.70547	3.94338	9.88	1.8775	1.29653
9.9	3.62646	3.87544	9.9	1.81819	1.72301
9.92	3.63736	3.45679	9.92	1.76508	1.98162
9.94	3.64124	3.88315	9.94	1.7468	1.38972
9.96	3.58343	3.48544	9.96	1.74958	1.31486
9.98	3.59818	3.42224	9.98	1.60644	1.54888
10	3.58022	3.50788	10	1.81783	1.86982
10.02	3.61895	3.47575	10.02	1.73024	1.71998
10.04	3.61063	3.63589	10.04	1.70623	1.80833
10.06	3.57945	3.22098	10.06	1.77409	1.80147
10.08	3.5872	3.74507	10.08	1.87965	2.32246
10.1	3.55822	3.5512	10.1	1.83889	1.905
10.12	3.60728	3.64829	10.12	1.80749	1.55779
10.14	3.58915	3.42878	10.14	1.72058	1.64227
10.16	3.5773	3.20024	10.16	1.79886	1.66554
10.18	3.5967	3.27024	10.18	1.85898	1.79357
10.2	3.61966	3.67073	10.2	1.72698	1.55543
10.22	3.64096	3.88014	10.22	1.82725	1.58057
10.24	3.50921	3.88192	10.24	1.80263	1.71996
10.26	3.51515	3.88595	10.26	1.81771	1.67154
10.28	3.50574	3.84662	10.28	1.75575	1.76539
10.3	3.42486	4.00658	10.3	1.80304	1.54049
10.32	3.49976	3.75439	10.32	1.71971	1.72905
10.34	3.55223	3.78237	10.34	1.768	1.7361
10.36	3.54862	3.85998	10.36	1.72914	1.64744
10.38	3.57062	4.03384	10.38	1.72206	1.76566
10.4	3.52331	3.84791	10.4	1.75667	1.67645
10.42	3.56986	3.96501	10.42	1.85724	1.63094
10.44	3.52947	3.82467	10.44	1.66057	1.41403
10.46	3.46396	3.72338	10.46	1.71534	1.44739
10.48	3.51417	4.05724	10.48	1.80069	1.38411
10.5	3.56842	3.80308	10.5	1.79165	1.45286
10.52	3.59589	3.99557	10.52	1.80067	1.48002
10.54	3.52565	3.98919	10.54	1.75536	1.39073
10.56	3.44682	4.09934	10.56	1.78989	1.32947
10.58	3.48607	3.92057	10.58	1.7649	1.43635
10.6	3.4093	3.72114	10.6	1.83674	1.6674
10.62	3.4581	3.8834	10.62	1.84605	1.70566
10.64	3.42428	3.71957	10.64	1.84611	1.66625
10.66	3.52595	3.95644	10.66	1.89306	1.61119
10.68	3.44841	3.91313	10.68	1.90227	1.77394
10.7	3.43545	3.82433	10.7	1.76941	1.47574
10.72	3.33277	3.93398	10.72	1.715	1.69134
10.74	3.38787	4.03235	10.74	1.72171	1.58433
10.76	3.46945	3.92383	10.76	1.69278	1.73119
10.78	3.47752	3.78082	10.78	1.70004	1.41195
10.8	3.47434	3.65872	10.8	1.76325	1.56445
10.82	3.42246	3.89525	10.82	1.73098	1.50102
10.84	3.45758	3.81658	10.84	1.68913	1.75097
10.86	3.40845	3.9043	10.86	1.70708	1.45113
10.88	3.49306	3.96252	10.88	1.75549	1.75759
10.9	3.44582	3.55427	10.9	1.67611	1.84697
10.92	3.35056	3.68111	10.92	1.76469	1.85194
10.94	3.45389	3.75872	10.94	1.90357	1.60405
10.96	3.53156	3.96386	10.96	1.72204	1.96956
10.98	3.46559	3.72801	10.98	1.79253	1.74668
11	3.49563	3.76523	11	1.66555	1.83126
11.02	3.45332	3.66725	11.02	1.74702	1.65261
11.04	3.47504	3.80436	11.04	1.73976	1.58744
11.06	3.42938	3.66585	11.06	1.73945	1.50135
11.08	3.48834	3.88379	11.08	1.76025	1.50486
11.1	3.47576	3.87751	11.1	1.76797	1.31524
11.12	3.49308	3.87466	11.12	1.71172	1.39173
11.14	3.44868	3.81976	11.14	1.66501	1.21112
11.16	3.5513	3.79249	11.16	1.80788	1.40495
11.18	3.47512	3.73269	11.18	1.78914	1.80169
11.2	3.57166	3.83443	11.2	1.85749	1.7264
11.22	3.51009	3.77139	11.22	1.91425	1.9388
11.24	3.5651	3.64221	11.24	1.91682	1.55837
11.26	3.54309	3.66204	11.26	1.83171	1.58165
11.28	3.53911	3.71182	11.28	1.82086	1.72954
11.3	3.58455	3.77017	11.3	1.86665	1.57891
11.32	3.55188	3.80371	11.32	1.89752	1.22133
11.34	3.45606	3.49794	11.34	1.83013	1.44778
11.36	3.44771	3.5871	11.36	1.86772	1.36827
11.38	3.39181	3.8314	11.38	1.85248	1.60793
11.4	3.37288	3.83219	11.4	1.8738	1.87154
11.42	3.40137	3.7542	11.42	1.77633	1.56839
11.44	3.39486	3.91408	11.44	1.75456	1.81424
11.46	3.39682	3.79959	11.46	1.83342	1.72051
11.48	3.39032	3.90008	11.48	1.79423	1.66104
11.5	3.43323	4.00432	11.5	1.79079	1.8589
11.52	3.44072	3.87197	11.52	1.71401	2.11016
11.54	3.4601	3.81171	11.54	1.66811	1.71491
11.56	3.4146	3.76177	11.56	1.71231	1.87416
11.58	3.39928	3.88986	11.58	1.78379	1.98253
11.6	3.42031	3.81763	11.6	1.80107	1.70428
11.62	3.45749	3.74635	11.62	1.80144	1.71572
11.64	3.53271	3.79936	11.64	1.7746	1.73333
11.66	3.50421	3.89743	11.66	1.78183	1.82502
11.68	3.45917	3.80411	11.68	1.7671	1.73097
11.7	3.47479	3.85408	11.7	1.82224	1.52803
11.72	3.40471	3.81967	11.72	1.79462	1.76522
11.74	3.44325	3.83452	11.74	1.76148	1.57672
11.76	3.47653	3.72897	11.76	1.84789	1.45416
11.78	3.48185	3.98213	11.78	1.84426	1.77082
11.8	3.50658	3.92006	11.8	1.7841	1.62031
11.82	3.46166	3.81022	11.82	1.88222	1.76617
11.84	3.44766	3.5358	11.84	1.90021	1.48692
11.86	3.39794	3.58981	11.86	1.95942	1.53523
11.88	3.41822	3.59275	11.88	1.86017	1.62934
11.9	3.51355	3.85451	11.9	1.81976	1.54522
11.92	3.43913	4.13989	11.92	1.87734	1.59908
11.94	3.48946	4.08662	11.94	1.94891	1.86142
11.96	3.49803	3.75718	11.96	1.83515	1.75884
11.98	3.48706	3.97675	11.98	1.85427	1.43922
12	3.46712	3.95511	12	1.85892	1.52505
12.02	3.44141	3.75666	12.02	1.87157	1.54412
12.04	3.49455	3.76198	12.04	1.81434	1.62339
12.06	3.49712	3.60609	12.06	1.81766	1.54347
12.08	3.42044	3.61446	12.08	1.85698	1.63393
12.1	3.53504	3.35754	12.1	1.77935	1.69225
12.12	3.61793	3.52062	12.12	1.86995	1.38893
12.14	3.56655	3.51951	12.14	1.90407	1.6163
12.16	3.54595	3.58656	12.16	1.83551	1.86568
12.18	3.62468	3.54707	12.18	1.90797	1.33251
12.2	3.51264	3.41031	12.2	1.79462	1.52935
12.22	3.56987	3.74214	12.22	1.69806	1.36687
12.24	3.50206	3.57917	12.24	1.76667	1.40535
12.26	3.50998	3.58908	12.26	1.8022	1.44092
12.28	3.4877	3.35052	12.28	1.77409	1.45118
12.3	3.46305	3.30086	12.3	1.84733	1.52289
12.32	3.497	3.30296	12.32	1.97106	1.39044
12.34	3.47003	3.36317	12.34	1.88458	1.46611
12.36	3.54391	3.29884	12.36	1.8499	1.51454
12.38	3.3923	3.33943	12.38	1.88166	1.46362
12.4	3.42877	3.41648	12.4	1.76551	1.48459
12.42	3.55796	3.58677	12.42	1.83147	1.4095
12.44	3.4653	3.52243	12.44	1.89707	1.36273
12.46	3.53027	3.68887	12.46	1.81213	1.66569
12.48	3.51838	3.64347	12.48	1.78179	1.78406
12.5	3.45798	3.42843	12.5	1.73243	1.33127
12.52	3.48621	3.52128	12.52	1.79677	1.37843
12.54	3.46231	3.39372	12.54	1.77485	1.43523
12.56	3.46165	2.98967	12.56	1.79299	1.7657
12.58	3.51723	3.17822	12.58	1.78254	1.29191
12.6	3.3205	3.22859	12.6	1.79257	1.40438
12.62	3.41972	3.42005	12.62	1.7083	1.57117
12.64	3.44417	3.16052	12.64	1.84136	1.57449
12.66	3.5118	3.14404	12.66	1.71295	1.53278
12.68	3.45747	3.19173	12.68	1.74608	1.56432
12.7	3.46737	3.37321	12.7	1.78813	1.54831
12.72	3.39955	2.81034	12.72	1.76589	1.48223
12.74	3.43078	3.20246	12.74	1.73033	1.65498
12.76	3.45268	3.21975	12.76	1.71401	1.65324
12.78	3.43343	3.38442	12.78	1.68817	2.18973
12.8	3.39285	3.54541	12.8	1.63535	1.91962
12.82	3.44648	3.36766	12.82	1.63651	1.73042
12.84	3.34274	3.54329	12.84	1.59781	2.00771
12.86	3.35854	3.56212	12.86	1.62958	1.95917
12.88	3.42763	3.29003	12.88	1.6176	1.58807
12.9	3.40746	3.32474	12.9	1.57654	1.68956
12.92	3.40226	3.40936	12.92	1.6588	2.13331
12.94	3.36802	3.80853	12.94	1.71947	1.68684
12.96	3.43614	3.85883	12.96	1.61793	1.75232
12.98	3.42804	3.60262	12.98	1.70301	1.77962
13	3.41669	3.70893	13	1.61968	1.8142
13.02	3.36786	3.77498	13.02	1.58193	1.57942
13.04	3.42837	3.5521	13.04	1.62851	1.50444
13.06	3.39615	3.70359	13.06	1.55753	1.6912
13.08	3.33265	3.3739	13.08	1.62362	1.85577
13.1	3.41872	3.38492	13.1	1.74579	1.77283
13.12	3.3862	3.33231	13.12	1.73711	1.70918
13.14	3.4778	3.31422	13.14	1.67718	1.48613
13.16	3.45687	3.31335	13.16	1.77051	1.57229
13.18	3.47912	3.38407	13.18	1.78808	2.03082
13.2	3.37156	3.35522	13.2	1.787	1.90057
13.22	3.46843	3.3636	13.22	1.71104	2.2597
13.24	3.35977	3.25642	13.24	1.70826	1.74951
13.26	3.4287	3.1863	13.26	1.78164	1.44027
13.28	3.41372	3.46116	13.28	1.75794	1.74955
13.3	3.42902	3.56078	13.3	1.71738	1.60165
13.32	3.45775	3.34206	13.32	1.73148	1.87065
13.34	3.43268	3.51307	13.34	1.57334	1.67004
13.36	3.38432	3.44503	13.36	1.63751	2.00618
13.38	3.39893	3.20036	13.38	1.57762	1.68724
13.4	3.38021	3.41912	13.4	1.61094	1.40705
13.42	3.40051	3.32829	13.42	1.70066	1.88317
13.44	3.32114	3.40936	13.44	1.75851	1.89409
13.46	3.41051	3.47547	13.46	1.75235	1.87613
13.48	3.38984	3.37031	13.48	1.7299	1.7932
13.5	3.43252	3.42093	13.5	1.64941	1.94089
13.52	3.44463	3.45863	13.52	1.65024	2.01048
13.54	3.37265	3.36803	13.54	1.68052	1.6224
13.56	3.35052	3.17004	13.56	1.74577	1.73875
13.58	3.38422	3.47228	13.58	1.73948	1.6023
13.6	3.43842	3.21201	13.6	1.72967	1.73894
13.62	3.44191	3.35206	13.62	1.72827	1.9023
13.64	3.38103	3.01564	13.64	1.71678	2.11981
13.66	3.42136	3.52082	13.66	1.72557	1.78526
13.68	3.42816	3.37161	13.68	1.69045	1.8594
13.7	3.44909	3.29876	13.7	1.65259	1.93418
13.72	3.33737	3.55906	13.72	1.91207	1.87571
13.74	3.45381	3.19468	13.74	1.72794	1.74574
13.76	3.38124	3.65846	13.76	1.76535	1.85453
13.78	3.39984	3.22423	13.78	1.76023	2.3607
13.8	3.34576	3.4967	13.8	1.70596	1.50784
13.82	3.40955	3.74723	13.82	1.72322	1.92803
13.84	3.31518	3.24312	13.84	1.78681	1.74764
13.86	3.33973	3.35551	13.86	1.75475	1.48764
13.88	3.4205	3.17613	13.88	1.7107	1.79912
13.9	3.47086	3.44197	13.9	1.74065	1.46252
13.92	3.55543	3.4362	13.92	1.77438	1.22529
13.94	3.50722	3.17673	13.94	1.75057	1.48028
13.96	3.42253	3.43604	13.96	1.82595	1.5068
13.98	3.40125	3.31568	13.98	1.79795	1.49077
14	3.49761	3.6565	14	1.77668	1.6468
14.02	3.35745	3.50717	14.02	1.69876	1.702
14.04	3.39535	3.2725	14.04	1.84845	2.26269
14.06	3.41651	3.56907	14.06	1.8014	2.02608
14.08	3.45639	3.51883	14.08	1.74928	2.01111
14.1	3.45886	3.54425	14.1	1.73246	1.40159
14.12	3.48023	3.61672	14.12	1.81266	1.89235
14.14	3.34095	3.55788	14.14	1.84488	1.68162
14.16	3.35546	3.46016	14.16	1.73677	2.02519
14.18	3.33289	3.42566	14.18	1.70334	1.87743
14.2	3.38219	3.21759	14.2	1.74179	1.61013
14.22	3.41678	3.4635	14.22	1.75034	2.18963
14.24	3.37971	3.53938	14.24	1.84413	1.49074
14.26	3.33077	3.67814	14.26	1.80514	1.96216
14.28	3.32232	3.38347	14.28	1.75904	1.92181
14.3	3.36693	3.10427	14.3	1.69364	1.48297
14.32	3.35046	3.3162	14.32	1.70218	1.69373
14.34	3.31838	3.47906	14.34	1.71405	1.64485
14.36	3.29584	3.47194	14.36	1.7809	1.61359
14.38	3.3318	3.34928	14.38	1.78145	1.51438
14.4	3.33506	3.50081	14.4	1.83216	1.47931
14.42	3.29062	3.87113	14.42	1.83567	1.27983
14.44	3.3322	3.4733	14.44	1.7126	1.48551
14.46	3.28916	3.49896	14.46	1.72294	1.48351
14.48	3.29686	3.52692	14.48	1.67584	1.61506
14.5	3.23539	3.47917	14.5	1.70382	1.46605
14.52	3.25834	3.82766	14.52	1.68313	1.345
14.54	3.32087	3.54985	14.54	1.80077	1.82877
14.56	3.35331	3.70605	14.56	1.84355	1.74115
14.58	3.32271	3.40475	14.58	1.75277	1.63117
14.6	3.28523	3.47718	14.6	1.73977	1.7323
14.62	3.30778	3.48148	14.62	1.71587	1.74172
14.64	3.3393	3.26821	14.64	1.67119	1.6045
14.66	3.358	3.5777	14.66	1.68372	1.8099
14.68	3.3863	3.41902	14.68	1.72106	1.6349
14.7	3.32359	3.45663	14.7	1.82309	1.83258
14.72	3.31686	3.43898	14.72	1.67105	1.9147
14.74	3.33995	3.69198	14.74	1.62315	1.71477
14.76	3.37006	3.73923	14.76	1.54708	1.64261
14.78	3.34353	3.86681	14.78	1.61857	1.53953
14.8	3.32066	3.67375	14.8	1.60081	1.88683
14.82	3.30874	3.5022	14.82	1.64522	1.67352
14.84	3.3957	3.69204	14.84	1.65069	1.90562
14.86	3.29734	3.42592	14.86	1.70816	1.74604
14.88	3.29573	3.73964	14.88	1.60769	1.85341
14.9	3.35044	3.9037	14.9	1.65195	1.70366
14.92	3.28317	3.58654	14.92	1.78177	1.43441
14.94	3.31542	3.51629	14.94	1.69329	1.51218
14.96	3.292	3.47715	14.96	1.71178	1.51486
14.98	3.29557	3.24638	14.98	1.7355	1.93583
15	3.31265	3.41908	15	1.70245	1.4267
15.02	3.25411	3.36562	15.02	1.70492	1.7268
15.04	3.33152	3.00743	15.04	1.68731	1.61019
15.06	3.45412	3.30907	15.06	1.71575	1.43523
15.08	3.44221	3.62137	15.08	1.67913	1.62415
15.1	3.45312	3.45435	15.1	1.6311	1.50383
15.12	3.34568	3.1379	15.12	1.74084	1.73246
15.14	3.39991	3.27494	15.14	1.66012	1.65208
15.16	3.37834	3.24621	15.16	1.73277	1.69641
15.18	3.37882	3.54175	15.18	1.7727	1.71469
15.2	3.43664	3.71287	15.2	1.76985	1.5634
15.22	3.38035	4.00086	15.22	1.71232	1.57757
15.24	3.38313	4.17317	15.24	1.71319	1.74407
15.26	3.39359	3.84837	15.26	1.64557	1.88813
15.28	3.40679	3.51157	15.28	1.72218	1.91395
15.3	3.35999	3.46221	15.3	1.78942	1.48886
15.32	3.46428	3.46164	15.32	1.79444	1.44076
15.34	3.43239	3.44443	15.34	1.77719	1.80344
15.36	3.44472	3.5915	15.36	1.72846	1.90305
15.38	3.41183	3.54743	15.38	1.61455	1.6756
15.4	3.45955	3.39535	15.4	1.61027	2.00671
15.42	3.395	3.46511	15.42	1.68613	1.7658
15.44	3.40102	3.33883	15.44	1.70663	1.89322
15.46	3.3793	3.21224	15.46	1.8217	1.44571
15.48	3.4753	3.37253	15.48	1.69632	1.42459
15.5	3.44649	3.36124	15.5	1.78219	1.52966
15.52	3.45716	3.86912	15.52	1.8257	1.77165
15.54	3.40597	3.76332	15.54	1.73801	1.60969
15.56	3.389	3.90819	15.56	1.72268	1.5521
15.58	3.39125	3.75371	15.58	1.79832	1.85186
15.6	3.4602	3.79568	15.6	1.68373	1.39456
15.62	3.50038	4.11126	15.62	1.61914	1.68012
15.64	3.42896	3.85171	15.64	1.67397	1.38216
15.66	3.40431	3.94821	15.66	1.72232	1.6987
15.68	3.37764	4.03844	15.68	1.68299	1.62887
15.7	3.39846	4.06447	15.7	1.7192	1.59254
15.72	3.43795	3.40497	15.72	1.73414	1.46254
15.74	3.43329	3.35127	15.74	1.77115	1.51646
15.76	3.43487	3.19425	15.76	1.75075	1.87149
15.78	3.38197	3.39961	15.78	1.75207	1.68042
15.8	3.4556	3.23272	15.8	1.697	1.43183
15.82	3.45107	3.36082	15.82	1.79067	1.5428
15.84	3.36927	3.15825	15.84	1.76321	1.53288
15.86	3.40784	3.32873	15.86	1.77048	1.91929
15.88	3.31756	3.69905	15.88	1.77705	1.73743
15.9	3.41186	3.48514	15.9	1.72945	1.83354
15.92	3.45437	3.2542	15.92	1.70212	1.52194
15.94	3.46503	3.5606	15.94	1.68117	1.87371
15.96	3.45703	3.4984	15.96	1.84961	1.72061
15.98	3.43092	3.00205	15.98	1.93888	1.77346
16	3.38006	3.28768	16	1.7471	1.31714
16.02	3.35358	3.39574	16.02	1.72717	1.25468
16.04	3.43211	3.69787	16.04	1.82164	1.45281
16.06	3.36881	3.68427	16.06	1.84195	1.57847
16.08	3.41347	3.56492	16.08	1.79213	1.55769
16.1	3.42527	3.47952	16.1	1.94321	1.23093
16.12	3.36866	3.77273	16.12	1.8622	1.39818
16.14	3.42452	3.9855	16.14	1.88358	1.3008
16.16	3.3353	4.10256	16.16	1.75861	1.66642
16.18	3.36048	3.71698	16.18	1.87774	1.29866
16.2	3.41079	3.55524	16.2	1.80831	1.35457
16.22	3.45405	3.53452	16.22	1.90065	1.41669
16.24	3.43494	3.36488	16.24	1.85925	1.96497
16.26	3.50262	3.38349	16.26	1.8036	1.8346
16.28	3.48398	3.13772	16.28	1.94268	1.9871
16.3	3.52263	3.62177	16.3	1.81807	1.77802
16.32	3.41233	3.82228	16.32	1.91089	1.85827
16.34	3.47459	3.99316	16.34	1.82738	1.84449
16.36	3.41412	3.74807	16.36	1.8006	1.59774
16.38	3.40569	3.78738	16.38	1.95062	1.62506
16.4	3.42493	3.61736	16.4	1.81318	1.61369
16.42	3.47454	3.94407	16.42	1.85981	1.51097
16.44	3.41435	4.03118	16.44	1.81881	1.78756
16.46	3.40461	3.74384	16.46	1.84711	1.68152
16.48	3.45537	3.9011	16.48	1.85703	1.44723
16.5	3.47118	3.23496	16.5	1.84195	1.51087
16.52	3.44951	4.01563	16.52	1.8488	1.43199
16.54	3.46193	4.16679	16.54	1.93262	1.68306
16.56	3.40241	3.85871	16.56	2.00967	1.91691
16.58	3.45235	4.03164	16.58	1.96474	1.5434
16.6	3.3957	3.92275	16.6	1.842	1.51942
16.62	3.42869	3.8533	16.62	1.81165	1.57414
16.64	3.39756	3.84318	16.64	1.80171	1.20851
16.66	3.43726	3.96164	16.66	1.80038	1.34712
16.68	3.38335	3.76609	16.68	1.79243	1.57601
16.7	3.3606	3.77401	16.7	1.88599	1.39666
16.72	3.401	3.91597	16.72	1.89027	1.41455
16.74	3.40362	3.62964	16.74	1.79158	1.39876
16.76	3.3828	3.5683	16.76	1.71569	1.31457
16.78	3.33571	3.72244	16.78	1.74338	1.47692
16.8	3.37203	3.81927	16.8	1.82365	1.45224
16.82	3.33443	3.80329	16.82	1.77273	1.45535
16.84	3.38974	3.70002	16.84	1.73408	1.48615
16.86	3.34001	3.80385	16.86	1.76234	1.48492
16.88	3.34467	3.4803	16.88	1.84257	1.43287
16.9	3.36884	3.49918	16.9	1.76546	1.30213
16.92	3.43966	3.7476	16.92	1.7932	1.34913
16.94	3.41055	3.66353	16.94	1.91622	1.30738
16.96	3.35722	3.54696	16.96	1.937	1.47805
16.98	3.42395	3.51924	16.98	1.81642	1.57389
17	3.37924	3.64994	17	1.86992	1.53436
17.02	3.38209	3.71062	17.02	1.89323	1.4648
17.04	3.43441	3.90096	17.04	1.78136	1.47429
17.06	3.40079	3.43082	17.06	1.78904	1.41372
17.08	3.4825	3.55784	17.08	1.89798	1.6858
17.1	3.51896	3.48336	17.1	1.91659	1.54663
17.12	3.49569	3.76474	17.12	1.93762	1.61224
17.14	3.50888	3.72275	17.14	1.95478	1.22293
17.16	3.4879	3.78941	17.16	1.87662	1.4985
17.18	3.48006	3.9512	17.18	1.86975	1.44813
17.2	3.45316	3.97596	17.2	1.80358	1.54143
17.22	3.49947	3.76698	17.22	1.80316	1.76485
17.24	3.46353	3.94963	17.24	1.88888	1.51717
17.26	3.43449	3.82415	17.26	1.92123	1.30251
17.28	3.3925	4.05574	17.28	1.86426	1.99221
17.3	3.33716	3.9356	17.3	1.92984	1.63742
17.32	3.4153	3.93833	17.32	1.87737	1.52168
17.34	3.49668	3.90053	17.34	1.9374	1.37741
17.36	3.36935	3.93588	17.36	1.95199	1.42483
17.38	3.38373	3.95455	17.38	1.83819	1.41534
17.4	3.39018	3.80449	17.4	1.8396	1.28201
17.42	3.39032	4.01373	17.42	1.95704	1.61634
17.44	3.40042	4.02859	17.44	1.86033	1.45138
17.46	3.36571	3.89476	17.46	1.75941	1.74338
17.48	3.40157	3.93714	17.48	1.88331	1.27636
17.5	3.41908	4.00873	17.5	1.81065	1.34851
17.52	3.40774	3.82303	17.52	1.68162	1.19737
17.54	3.43925	4.0682	17.54	1.7094	1.52087
17.56	3.35739	3.89563	17.56	1.71616	1.24224
17.58	3.37144	3.88087	17.58	1.63547	1.56827
17.6	3.39327	3.68071	17.6	1.68339	1.50238
17.62	3.4107	3.84112	17.62	1.70163	1.22004
17.64	3.41307	3.60135	17.64	1.75292	1.20114
17.66	3.46407	3.6739	17.66	1.78106	1.62385
17.68	3.49163	3.90528	17.68	1.9075	1.23902
17.7	3.36473	3.89321	17.7	1.73502	1.44423
17.72	3.42832	3.80683	17.72	1.70408	1.76687
17.74	3.50272	3.8291	17.74	1.79328	1.39357
17.76	3.42028	3.89044	17.76	1.79024	1.55043
17.78	3.42329	3.91111	17.78	1.71988	1.65978
17.8	3.49382	3.90035	17.8	1.71346	1.24936
17.82	3.52485	3.96904	17.82	1.71198	2.00145
17.84	3.53416	3.75607	17.84	1.62897	1.61146
17.86	3.43749	3.4886	17.86	1.59526	1.48157
17.88	3.40933	3.42045	17.88	1.69244	1.20522
17.9	3.41744	3.47478	17.9	1.66732	1.63753
17.92	3.41072	3.58476	17.92	1.64714	1.50899
17.94	3.43176	3.5972	17.94	1.64843	1.57407
17.96	3.37299	3.57483	17.96	1.68214	1.23325
17.98	3.50013	3.57713	17.98	1.68238	1.30173
18	3.43831	3.51881	18	1.81418	1.46564
18.02	3.38972	3.48588	18.02	1.68432	1.48705
18.04	3.38937	3.37696	18.04	1.80335	1.2407
18.06	3.35766	3.27942	18.06	1.73148	1.82211
18.08	3.40484	3.46052	18.08	1.77287	1.24556
18.1	3.3991	3.55041	18.1	1.70132	1.41291
18.12	3.48043	3.52405	18.12	1.72823	1.65387
18.14	3.51259	3.52331	18.14	1.69558	1.59767
18.16	3.44356	3.44616	18.16	1.72891	1.56193
18.18	3.49269	3.35396	18.18	1.87187	1.66767
18.2	3.50449	3.11874	18.2	1.71526	1.7423
18.22	3.51186	3.24534	18.22	1.75473	1.44665
18.24	3.40986	3.31824	18.24	1.80915	1.60659
18.26	3.4014	3.38485	18.26	1.77058	1.42407
18.28	3.45928	3.24838	18.28	1.74637	1.98468
18.3	3.4114	3.14343	18.3	1.82857	1.63254
18.32	3.4316	3.15914	18.32	1.84107	1.8422
18.34	3.49187	3.28664	18.34	1.78371	1.82299
18.36	3.55997	3.15161	18.36	1.84684	1.69701
18.38	3.49023	3.21108	18.38	1.86218	1.4482
18.4	3.53953	3.11078	18.4	1.77926	1.78277
18.42	3.4497	3.29444	18.42	1.81977	1.61224
18.44	3.4553	3.04521	18.44	1.85338	1.73925
18.46	3.45885	3.1747	18.46	1.85297	1.66977
18.48	3.45677	3.01817	18.48	1.85685	1.93135
18.5	3.46939	2.91351	18.5	1.81829	2.02509
18.52	3.47411	3.17458	18.52	1.85242	1.79095
18.54	3.4591	2.87257	18.54	1.81441	1.51751
18.56	3.57233	3.02836	18.56	1.93324	1.83664
18.58	3.48852	3.0257	18.58	1.89012	1.7791
18.6	3.60656	3.10545	18.6	2.04674	1.53969
18.62	3.55005	3.187	18.62	2.0046	1.8205
18.64	3.45612	3.12215	18.64	1.9263	1.69785
18.66	3.55442	3.02831	18.66	1.96391	1.99543
18.68	3.49032	3.07207	18.68	1.91174	1.89838
18.7	3.44667	3.26687	18.7	1.83109	1.72101
18.72	3.42849	3.23361	18.72	1.87052	1.70894
18.74	3.47165	2.99514	18.74	1.98179	1.8605
18.76	3.43241	3.18964	18.76	1.85228	1.72476
18.78	3.43377	3.06753	18.78	1.83576	1.88211
18.8	3.44545	3.05927	18.8	1.80855	1.8666
18.82	3.39893	3.08426	18.82	1.79607	1.62118
18.84	3.46218	3.18587	18.84	1.7472	1.81446
18.86	3.48071	3.10937	18.86	1.74248	1.71232
18.88	3.49882	3.17365	18.88	1.76626	1.46357
18.9	3.43774	3.31819	18.9	1.76477	1.57799
18.92	3.49956	3.14022	18.92	1.86207	1.48801
18.94	3.50722	3.19045	18.94	1.81786	1.80666
18.96	3.47519	3.04381	18.96	1.8064	1.42112
18.98	3.53472	3.20452	18.98	1.73027	1.73622
19	3.52861	3.09928	19	1.85369	1.71684
19.02	3.49456	3.12976	19.02	1.7969	1.56316
19.04	3.54063	3.1499	19.04	1.83509	1.74693
19.06	3.40839	3.20072	19.06	1.88266	1.8287
19.08	3.48208	3.11953	19.08	1.77473	1.43681
19.1	3.47351	3.27622	19.1	1.82515	1.5358
19.12	3.47304	3.18917	19.12	1.76758	1.86004
19.14	3.52009	3.16546	19.14	1.9246	1.68297
19.16	3.42474	3.01965	19.16	1.87242	1.67974
19.18	3.47463	3.14439	19.18	1.79831	1.68346
19.2	3.43952	3.02838	19.2	1.85239	1.5497
19.22	3.41887	3.14638	19.22	1.82028	1.72261
19.24	3.4368	3.08581	19.24	1.87671	1.71218
19.26	3.51707	3.13026	19.26	1.77041	1.58278
19.28	3.49468	2.88531	19.28	1.8457	1.75087
19.3	3.47414	3.05796	19.3	1.74605	1.73167
19.32	3.39165	3.04428	19.32	1.83568	1.53055
19.34	3.46536	3.12127	19.34	1.88191	1.84271
19.36	3.3913	3.01296	19.36	1.79566	1.8427
19.38	3.46332	3.01428	19.38	1.77928	1.84249
19.4	3.42387	3.20607	19.4	1.69787	1.77932
19.42	3.49807	3.15238	19.42	1.70809	1.62428
19.44	3.36621	3.16182	19.44	1.76372	1.50094
19.46	3.3899	3.20684	19.46	1.70461	1.5287
19.48	3.41907	3.27599	19.48	1.84182	1.62357
19.5	3.29944	3.0558	19.5	1.76103	1.69039
19.52	3.30626	3.08072	19.52	1.82691	1.76729
19.54	3.36139	2.88225	19.54	1.79611	1.29619
19.56	3.37488	3.16969	19.56	1.74095	1.58707
19.58	3.37554	2.83543	19.58	1.85953	1.41345
19.6	3.42662	2.8899	19.6	1.86341	1.40818
19.62	3.44646	3.18045	19.62	1.90622	1.64565
19.64	3.39073	2.95618	19.64	1.80236	1.20315
19.66	3.47635	3.24884	19.66	1.76227	1.41536
19.68	3.44858	3.14699	19.68	1.76811	1.39715
19.7	3.39039	3.09784	19.7	1.73557	1.19195
19.72	3.41603	3.28076	19.72	1.7	1.37798
19.74	3.42375	3.24262	19.74	1.79982	1.54868
19.76	3.4316	3.139	19.76	1.80132	1.55049
19.78	3.3591	3.1967	19.78	1.77694	1.37544
19.8	3.35082	3.08183	19.8	1.67931	1.48363
19.82	3.39596	3.15218	19.82	1.67716	1.60391
19.84	3.43501	3.09201	19.84	1.73371	1.55196
19.86	3.35746	3.02177	19.86	1.62878	1.78008
19.88	3.36777	3.02908	19.88	1.67725	1.61975
19.9	3.46285	3.1472	19.9	1.74107	1.28138
19.92	3.42448	3.10427	19.92	1.72049	1.34393
19.94	3.52866	3.1736	19.94	1.74839	1.74345
19.96	3.47436	3.107	19.96	1.84048	1.67529
19.98	3.43069	3.24279	19.98	1.89763	1.71928
20	3.4679	3.3005	20	1.74731	1.73712
20.02	3.45288	3.03192	20.02	1.71485	1.71764
20.04	3.45025	3.29598	20.04	1.79419	1.6862
20.06	3.47279	3.06163	20.06	1.66551	1.64116
20.08	3.41831	3.20589	20.08	1.73544	1.62096
20.1	3.39289	3.04399	20.1	1.76579	1.58016
20.12	3.36886	3.01584	20.12	1.81619	1.69565
20.14	3.40382	3.05794	20.14	1.78618	1.87669
20.16	3.40585	2.91502	20.16	1.89004	1.62814
20.18	3.47025	2.91466	20.18	1.90611	1.62671
20.2	3.41792	3.184	20.2	1.83511	1.82591
20.22	3.46372	3.21822	20.22	1.92173	1.83352
20.24	3.42777	3.26455	20.24	1.8513	1.61905
20.26	3.43044	3.19387	20.26	1.8431	1.803
20.28	3.40482	3.25834	20.28	2.01515	1.84985
20.3	3.47221	3.33935	20.3	1.87763	1.73494
20.32	3.52955	3.15944	20.32	1.94869	1.5238
20.34	3.52088	3.16267	20.34	1.85754	1.63427
20.36	3.48243	3.02904	20.36	1.9183	1.68497
20.38	3.33679	2.76129	20.38	1.84188	1.33033
20.4	3.40522	2.61607	20.4	1.84867	1.68451
20.42	3.41799	3.22965	20.42	1.83392	1.82274
20.44	3.43708	3.01779	20.44	1.85505	1.75344
20.46	3.40467	3.12211	20.46	1.8379	1.62717
20.48	3.48932	2.74566	20.48	1.89187	1.82791
20.5	3.43664	2.81144	20.5	1.81272	1.71519
20.52	3.50757	2.89615	20.52	1.97262	1.91166
20.54	3.5673	3.00729	20.54	1.78255	1.63943
20.56	3.48762	3.30381	20.56	1.84987	1.94127
20.58	3.54663	3.25908	20.58	1.81195	1.82191
20.6	3.60828	3.19722	20.6	1.78723	1.90723
20.62	3.46388	3.04424	20.62	1.92336	1.77836
20.64	3.36607	3.05356	20.64	1.92401	1.72351
20.66	3.49776	3.03405	20.66	1.887	1.57097
20.68	3.42088	3.22951	20.68	1.9722	1.89889
20.7	3.52373	3.15744	20.7	1.92933	1.62335
20.72	3.5544	3.06004	20.72	1.82068	1.79548
20.74	3.48129	3.22052	20.74	1.81717	1.65046
20.76	3.50835	3.0619	20.76	1.93456	1.7352
20.78	3.45318	3.04211	20.78	1.94591	1.76856
20.8	3.50357	3.12937	20.8	1.80247	1.86304
20.82	3.57385	3.09672	20.82	1.77698	1.82875
20.84	3.53644	3.02662	20.84	1.85103	1.73994
20.86	3.59267	3.08003	20.86	1.88966	1.73504
20.88	3.49712	3.20725	20.88	1.74814	1.76633
20.9	3.54869	3.02442	20.9	1.77231	1.84352
20.92	3.50737	2.94668	20.92	1.71123	2.02258
20.94	3.48683	3.04352	20.94	1.81162	1.88571
20.96	3.54822	3.17945	20.96	1.80134	1.6398
20.98	3.56438	3.14293	20.98	1.7871	1.5961
21	3.46197	3.07254	21	1.79454	1.69908
21.02	3.5072	3.1413	21.02	1.83097	1.51253
21.04	3.40938	3.01851	21.04	1.89599	1.6379
21.06	3.51739	3.11213	21.06	1.89535	1.64858
21.08	3.52138	3.08655	21.08	1.9262	1.72677
21.1	3.53963	3.10417	21.1	1.89969	1.87119
21.12	3.49211	3.0142	21.12	1.88623	2.07387
21.14	3.491	3.09557	21.14	1.88573	1.84353
21.16	3.46683	3.1718	21.16	1.89365	1.69497
21.18	3.43056	3.27635	21.18	1.91788	1.55433
21.2	3.42138	3.20689	21.2	1.7252	1.71145
21.22	3.43009	3.1298	21.22	1.83022	1.85176
21.24	3.45996	3.22846	21.24	1.82439	1.85642
21.26	3.39017	3.161	21.26	1.88261	1.63895
21.28	3.42884	3.44157	21.28	1.7552	1.54535
21.3	3.37257	3.377	21.3	1.76277	1.62476
21.32	3.44374	3.39775	21.32	1.83362	1.44569
21.34	3.40861	3.12383	21.34	1.80021	1.45956
21.36	3.44448	3.25729	21.36	1.8049	1.58981
21.38	3.466	3.26231	21.38	1.77192	1.5795
21.4	3.47102	3.28688	21.4	1.8288	1.51954
21.42	3.47873	3.37597	21.42	1.85674	1.88061
21.44	3.38601	3.25469	21.44	1.90987	1.74352
21.46	3.45573	3.2646	21.46	1.88984	1.72155
21.48	3.40724	3.42701	21.48	1.93733	1.54306
21.5	3.44766	3.36536	21.5	1.89375	1.81751
21.52	3.37037	3.37187	21.52	1.87907	1.89959
21.54	3.43794	3.22317	21.54	1.85163	1.63793
21.56	3.37079	3.33621	21.56	1.88326	1.82656
21.58	3.37258	3.22634	21.58	1.7945	1.72948
21.6	3.44227	3.3777	21.6	1.72758	1.77575
21.62	3.42298	3.43297	21.62	1.69117	1.69453
21.64	3.43194	3.51797	21.64	1.83724	1.68679
21.66	3.43812	3.28011	21.66	1.90202	1.75449
21.68	3.44146	3.52343	21.68	1.77618	2.00746
21.7	3.44936	3.8397	21.7	1.84673	1.61683
21.72	3.42479	3.75802	21.72	1.81921	1.23101
21.74	3.40081	3.44752	21.74	1.72837	1.78026
21.76	3.34105	3.36015	21.76	1.78288	1.80829
21.78	3.41371	3.5429	21.78	1.82621	1.76317
21.8	3.39193	3.64819	21.8	1.86117	1.43611
21.82	3.39166	3.5016	21.82	1.84196	1.95465
21.84	3.43629	3.44812	21.84	1.8397	1.6736
21.86	3.39194	3.45988	21.86	1.66979	1.68578
21.88	3.41162	3.21594	21.88	1.79122	1.56999
21.9	3.37137	3.27937	21.9	1.86372	1.56817
21.92	3.36801	3.33627	21.92	1.87184	1.72168
21.94	3.44407	3.29711	21.94	1.82686	1.88984
21.96	3.36262	3.24841	21.96	1.91348	1.69286
21.98	3.40509	3.31022	21.98	1.9321	1.45018
22	3.42687	3.41295	22	2.10116	1.59911
22.02	3.46947	3.50859	22.02	1.91321	1.43874
22.04	3.39349	3.47173	22.04	1.87654	1.49762
22.06	3.41552	3.44694	22.06	1.85891	1.20898
22.08	3.43217	3.27595	22.08	1.87857	1.29716
22.1	3.48668	3.43837	22.1	1.96879	1.42744
22.12	3.48981	3.20842	22.12	1.89247	1.50528
22.14	3.56419	3.40809	22.14	1.96493	1.75801
22.16	3.45457	3.41766	22.16	1.9622	1.78105
22.18	3.46014	3.41183	22.18	2.00335	2.07699
22.2	3.36158	3.31604	22.2	2.03255	1.75229
22.22	3.40619	3.30309	22.22	2.0279	1.77084
22.24	3.3786	3.25533	22.24	1.9131	1.92955
22.26	3.35433	3.24213	22.26	1.9662	1.76927
22.28	3.39331	3.4779	22.28	1.97565	1.77025
22.3	3.4013	3.19848	22.3	1.90571	1.407
22.32	3.38165	3.227	22.32	1.75333	1.80248
22.34	3.41124	3.39123	22.34	1.76277	1.7082
22.36	3.38527	3.3196	22.36	1.70175	1.6531
22.38	3.34451	3.56988	22.38	1.68963	1.57643
22.4	3.41421	3.35355	22.4	1.78046	1.73444
22.42	3.46216	3.17749	22.42	1.78691	1.49614
22.44	3.39392	3.13701	22.44	1.80394	1.74027
22.46	3.41458	3.1604	22.46	1.76894	1.48599
22.48	3.47111	3.25842	22.48	1.80453	1.5065
22.5	3.44062	3.39676	22.5	1.80779	1.39376
22.52	3.37915	3.3631	22.52	1.8771	1.65093
22.54	3.4067	3.1812	22.54	1.80473	1.58092
22.56	3.32779	3.19113	22.56	1.87244	1.44591
22.58	3.41327	3.46579	22.58	1.89976	1.53027
22.6	3.42544	3.29325	22.6	1.91898	1.79984
22.62	3.44028	3.18006	22.62	1.97087	1.22775
22.64	3.40334	3.28391	22.64	2.00512	1.67541
22.66	3.31055	3.31634	22.66	2.01962	1.44094
22.68	3.33837	3.29051	22.68	1.92202	1.34645
22.7	3.3696	3.25739	22.7	1.99857	1.48992
22.72	3.32627	3.29966	22.72	2.0252	1.53467
22.74	3.32901	3.2615	22.74	1.9483	1.8936
22.76	3.36994	3.34155	22.76	1.90744	1.47426
22.78	3.38645	3.23673	22.78	1.86894	1.69398
22.8	3.3045	3.26659	22.8	1.77098	1.51721
22.82	3.36496	3.31546	22.82	1.79657	1.20918
22.84	3.26745	3.41237	22.84	1.7475	1.61986
22.86	3.27622	3.17177	22.86	1.80332	1.77879
22.88	3.37917	3.21321	22.88	1.77124	1.40842
22.9	3.38594	3.22489	22.9	1.80884	1.49175
22.92	3.31869	3.40449	22.92	1.86006	1.42618
22.94	3.41947	3.06052	22.94	1.83464	1.59088
22.96	3.37982	3.23396	22.96	1.88989	1.44189
22.98	3.31427	3.18224	22.98	1.85709	1.57896
23	3.35815	3.28727	23	1.91048	1.47635
23.02	3.36566	3.17127	23.02	1.78878	2.15357
23.04	3.36026	3.24837	23.04	1.85477	1.78417
23.06	3.34091	3.29564	23.06	1.67488	1.83475
23.08	3.32324	3.30738	23.08	1.88889	1.57025
23.1	3.29493	3.28672	23.1	1.88628	1.62868
23.12	3.31789	3.20455	23.12	1.91971	1.44903
23.14	3.35072	3.25506	23.14	1.85926	1.82752
23.16	3.38188	3.1362	23.16	1.71654	1.25474
23.18	3.35857	3.33228	23.18	1.84443	1.45164
23.2	3.35659	3.20518	23.2	1.91178	1.44801
23.22	3.33927	3.28638	23.22	1.78495	1.51303
23.24	3.41697	3.33225	23.24	1.72383	1.24955
23.26	3.34198	3.30941	23.26	1.78028	1.57121
23.28	3.28193	3.24138	23.28	1.83491	1.41844
23.3	3.35856	3.18912	23.3	1.91847	1.79279
23.32	3.31259	3.28051	23.32	1.90164	1.42888
23.34	3.44193	3.19713	23.34	2.10928	1.42657
23.36	3.36663	3.17278	23.36	1.91933	1.41147
23.38	3.41187	3.1483	23.38	1.87086	1.46918
23.4	3.40028	3.20308	23.4	1.7871	1.76621
23.42	3.40766	3.17014	23.42	1.85002	1.7023
23.44	3.34579	3.25883	23.44	1.70545	1.99622
23.46	3.37595	3.13237	23.46	1.78051	1.71536
23.48	3.41618	3.11046	23.48	1.67779	1.81241
23.5	3.34898	3.3883	23.5	1.83005	1.33958
23.52	3.35633	3.49886	23.52	1.80159	1.29191
23.54	3.42654	3.30636	23.54	1.819	1.40918
23.56	3.40287	3.37797	23.56	1.6952	1.49734
23.58	3.36799	3.36782	23.58	1.61073	1.6553
23.6	3.4037	3.21909	23.6	1.63843	1.56815
23.62	3.3342	3.31309	23.62	1.59783	1.41824
23.64	3.38882	3.30679	23.64	1.71358	1.74837
23.66	3.39765	3.22138	23.66	1.70252	1.86755
23.68	3.36972	3.41853	23.68	1.84828	2.28726
23.7	3.39856	3.3659	23.7	1.71878	1.78888
23.72	3.50527	3.31338	23.72	1.5594	1.79495
23.74	3.41816	3.34128	23.74	1.65667	1.59359
23.76	3.49828	3.30694	23.76	1.74203	1.51969
23.78	3.40431	3.26605	23.78	1.69912	1.40471
23.8	3.41244	3.37706	23.8	1.74776	1.70142
23.82	3.34681	3.34042	23.82	1.71368	1.67877
23.84	3.39319	3.35846	23.84	1.8592	1.52483
23.86	3.38259	3.25962	23.86	1.76228	1.41668
23.88	3.43468	3.24251	23.88	1.70566	1.52162
23.9	3.28902	3.28997	23.9	1.69527	1.60195
23.92	3.41276	3.71089	23.92	1.7617	2.03333
23.94	3.412	3.29525	23.94	1.75851	1.89091
23.96	3.35849	3.35106	23.96	1.75417	1.63096
23.98	3.41643	3.56859	23.98	1.78454	1.83871
24	3.41728	3.39547	24	1.82803	1.51494
24.02	3.35654	3.65603	24.02	1.86693	1.93503
24.04	3.38657	3.4957	24.04	1.77088	1.61408
24.06	3.43648	3.50841	24.06	1.90649	1.45914
24.08	3.36807	3.40216	24.08	1.69023	2.16379
24.1	3.3357	3.37102	24.1	1.7447	1.47301
24.12	3.38864	3.52236	24.12	1.78001	1.83893
24.14	3.35838	3.46963	24.14	1.77256	1.88999
24.16	3.36021	3.40308	24.16	1.79097	2.22562
24.18	3.49162	3.29318	24.18	1.81753	1.42925
24.2	3.47273	3.3643	24.2	1.83802	1.70851
24.22	3.41288	3.14751	24.22	1.81234	1.55082
24.24	3.43867	3.27405	24.24	1.78118	1.83123
24.26	3.38533	3.04538	24.26	1.83465	2.03719
24.28	3.38631	3.06903	24.28	1.79238	2.19401
24.3	3.37844	3.20757	24.3	1.83462	1.83311
24.32	3.46318	3.13544	24.32	1.87734	2.66279
24.34	3.4309	3.09603	24.34	1.76047	2.2717
24.36	3.37672	3.52308	24.36	1.73392	2.09778
24.38	3.34448	3.45162	24.38	1.79473	1.98504
24.4	3.35952	3.44313	24.4	1.76288	1.71879
24.42	3.41443	3.62705	24.42	1.84679	1.48133
24.44	3.41476	3.1639	24.44	1.86848	1.65863
24.46	3.48755	3.335	24.46	1.73511	2.11534
24.48	3.51783	3.08384	24.48	1.79264	2.40988
24.5	3.40937	3.04132	24.5	1.81528	2.44263
24.52	3.42369	2.89581	24.52	1.82377	1.98018
24.54	3.44396	3.04323	24.54	1.78899	2.45311
24.56	3.40279	3.33919	24.56	1.87429	2.2319
24.58	3.36662	3.09941	24.58	1.8168	2.29385
24.6	3.41173	3.11251	24.6	1.7403	2.35624
24.62	3.437	3.13415	24.62	1.79339	2.40172
24.64	3.43286	3.10615	24.64	1.86217	1.60691
24.66	3.40327	3.01093	24.66	2.02607	2.16367
24.68	3.39197	3.18334	24.68	2.0028	2.65473
24.7	3.4481	3.2202	24.7	1.90326	2.69587
24.72	3.43865	3.06559	24.72	1.88367	2.82615
24.74	3.37581	3.21559	24.74	1.86608	2.81986
24.76	3.46582	3.26529	24.76	1.85349	2.91535
24.78	3.42991	3.18948	24.78	1.83755	2.65587
24.8	3.46627	3.15281	24.8	1.90251	2.5824
24.82	3.48593	3.10254	24.82	1.86759	3.08589
24.84	3.38171	3.21642	24.84	1.82611	2.65853
24.86	3.41251	3.21065	24.86	1.89713	2.33479
24.88	3.38237	3.20958	24.88	1.81199	3.08488
24.9	3.46846	3.38301	24.9	2.00969	2.72249
24.92	3.48408	3.32977	24.92	1.95603	2.88027
24.94	3.45642	3.1713	24.94	1.9411	2.54871
24.96	3.35881	3.2444	24.96	2.11617	2.97208
24.98	3.40491	3.27348	24.98	2.05215	3.0037
25	3.46349	3.22161	25	2.0735	3.02382
25.02	3.41518	3.11983	25.02	1.96819	2.62344
25.04	3.39204	3.20802	25.04	2.01339	2.68296
25.06	3.39639	3.09507	25.06	1.92784	2.51945
25.08	3.3894	3.2925	25.08	1.98257	2.24419
25.1	3.37795	3.40881	25.1	2.00695	2.20619
25.12	3.37017	3.50378	25.12	2.01207	1.89074
25.14	3.38163	3.53459	25.14	1.92523	2.04423
25.16	3.34098	4.00072	25.16	1.9367	2.33378
25.18	3.40243	3.47332	25.18	2.00079	2.17828
25.2	3.41501	3.67977	25.2	1.88171	2.68125
25.22	3.434	3.47338	25.22	1.87015	2.41506
25.24	3.41664	3.54313	25.24	1.96967	2.42575
25.26	3.404	3.81668	25.26	1.85118	2.0536
25.28	3.41991	3.87282	25.28	1.83653	2.19849
25.3	3.45138	3.86882	25.3	1.79011	2.47138
25.32	3.41394	3.43679	25.32	1.97288	2.75835
25.34	3.39026	3.41918	25.34	1.93433	2.20866
25.36	3.37992	3.48363	25.36	1.82405	2.18505
25.38	3.45707	3.37498	25.38	1.91289	2.46318
25.4	3.44583	3.4982	25.4	1.8837	2.30565
25.42	3.37991	3.47366	25.42	1.78735	2.35529
25.44	3.46103	3.47958	25.44	1.89317	2.2096
25.46	3.42706	3.61851	25.46	1.99643	2.09803
25.48	3.34031	3.13786	25.48	1.99477	2.2306
25.5	3.46443	3.43271	25.5	1.89927	2.03319
25.52	3.49336	3.14478	25.52	1.80007	1.43032
25.54	3.45686	3.12386	25.54	1.80621	1.78767
25.56	3.46445	3.11081	25.56	1.76664	2.17614
25.58	3.54885	3.14603	25.58	1.79806	1.86524
25.6	3.4863	3.05474	25.6	1.94253	2.15095
25.62	3.44278	3.0412	25.62	1.94705	2.05985
25.64	3.36307	3.18272	25.64	1.77508	2.11988
25.66	3.4174	3.24911	25.66	1.77113	2.66174
25.68	3.40213	3.29372	25.68	1.85545	2.0738
25.7	3.44213	3.29239	25.7	1.795	1.7567
25.72	3.37534	3.25927	25.72	1.72379	1.74604
25.74	3.39661	3.35676	25.74	1.85007	1.97077
25.76	3.43171	3.38811	25.76	1.90202	2.12968
25.78	3.47442	3.27751	25.78	1.82521	1.85785
25.8	3.44044	3.30886	25.8	1.89315	1.91437
25.82	3.46317	3.16125	25.82	1.76119	2.29208
25.84	3.42757	3.30513	25.84	1.86374	2.27055
25.86	3.49132	3.17315	25.86	1.84109	2.03182
25.88	3.42029	3.27018	25.88	1.96129	2.19351
25.9	3.47769	3.1476	25.9	1.9112	2.00512
25.92	3.41047	3.17861	25.92	1.85992	2.541
25.94	3.44218	3.05563	25.94	1.93819	2.60209
25.96	3.43663	3.14658	25.96	1.99042	2.16426
25.98	3.34378	3.10081	25.98	2.01703	2.16235
26	3.39931	3.32168	26	2.00699	2.35154
26.02	3.37513	3.2484	26.02	1.95532	2.09456
26.04	3.33226	3.17307	26.04	2.03399	1.68521
26.06	3.35398	3.41202	26.06	1.94348	1.85027
26.08	3.32384	3.28711	26.08	1.96459	2.27029
26.1	3.36629	3.23663	26.1	2.03588	2.35742
26.12	3.41867	3.41318	26.12	1.89579	1.9863
26.14	3.41326	3.36679	26.14	1.97641	1.99769
26.16	3.42157	3.36916	26.16	2.02662	2.36895
26.18	3.44761	3.42288	26.18	1.92667	1.79873
26.2	3.45012	3.62986	26.2	2.11695	2.12221
26.22	3.47325	3.91663	26.22	2.07586	1.91683
26.24	3.48954	3.52133	26.24	2.06546	2.27834
26.26	3.42684	3.49476	26.26	1.93844	2.17868
26.28	3.50032	3.64921	26.28	2.1227	2.42878
26.3	3.39681	3.44618	26.3	2.08912	2.26504
26.32	3.4155	3.60249	26.32	2.03994	2.27429
26.34	3.42997	3.41448	26.34	1.94235	1.90308
26.36	3.38967	3.58262	26.36	1.95541	2.32904
26.38	3.46686	3.57671	26.38	2.01937	1.84616
26.4	3.45728	3.55293	26.4	2.0414	1.9493
26.42	3.40918	3.66692	26.42	2.00317	1.79526
26.44	3.41386	3.50249	26.44	2.0351	1.77653
26.46	3.34115	3.58462	26.46	2.11916	2.38189
26.48	3.35249	3.59974	26.48	1.90947	2.22294
26.5	3.36588	3.75475	26.5	1.91989	2.29604
26.52	3.41757	3.79688	26.52	1.77127	2.34484
26.54	3.44513	4.01848	26.54	1.91981	1.92549
26.56	3.44471	3.86915	26.56	1.88548	2.13929
26.58	3.35155	4.02634	26.58	1.93581	2.23903
26.6	3.42528	4.05	26.6	1.85933	2.15038
26.62	3.41934	3.93468	26.62	1.82936	2.25059
26.64	3.36337	3.99963	26.64	1.949	2.40141
26.66	3.53212	4.08933	26.66	2.00172	2.25635
26.68	3.49851	4.15476	26.68	1.83026	1.55798
26.7	3.42362	4.11468	26.7	1.83874	1.71461
26.72	3.48475	3.9442	26.72	1.83302	1.91655
26.74	3.40377	3.97288	26.74	1.95973	1.34868
26.76	3.40323	3.79371	26.76	1.90511	1.49784
26.78	3.33386	4.05478	26.78	1.94445	1.50107
26.8	3.33641	3.77279	26.8	2.00997	1.32861
26.82	3.39688	3.86941	26.82	1.90033	1.58015
26.84	3.29726	3.97108	26.84	1.95744	1.22181
26.86	3.3346	3.89434	26.86	1.82592	1.91978
26.88	3.41131	3.46871	26.88	1.91286	1.4196
26.9	3.34785	3.46246	26.9	1.74232	1.33385
26.92	3.37471	3.65686	26.92	1.80553	1.21197
26.94	3.37855	3.47651	26.94	1.7494	1.27444
26.96	3.45266	3.43943	26.96	1.91912	1.17167
26.98	3.48129	3.33324	26.98	1.88994	1.43472
27	3.42217	3.3372	27	1.85266	1.52734
27.02	3.41602	4	27.02	1.87965	1.73594
27.04	3.42417	3.88541	27.04	1.74635	2.04208
27.06	3.38268	3.81568	27.06	1.80775	1.93194
27.08	3.42254	3.86876	27.08	1.92098	1.39146
27.1	3.31873	4.04603	27.1	1.99459	2.01416
27.12	3.36485	3.43686	27.12	2.01888	1.33118
27.14	3.34498	3.72733	27.14	1.85409	1.56569
27.16	3.42094	3.97433	27.16	1.92959	1.37758
27.18	3.40598	3.99949	27.18	1.99231	1.65337
27.2	3.39385	3.84039	27.2	2.0339	1.6042
27.22	3.38739	3.89089	27.22	2.09754	1.79743
27.24	3.39381	3.96365	27.24	2.04297	1.29547
27.26	3.41875	3.99713	27.26	2.04281	1.76577
27.28	3.4788	3.98753	27.28	1.95998	1.8538
27.3	3.45926	3.96392	27.3	2.0995	1.42353
27.32	3.39554	4.05306	27.32	2.04072	1.93607
27.34	3.37602	4.08233	27.34	2.12813	1.37875
27.36	3.50237	3.91413	27.36	1.98838	2.10455
27.38	3.50583	3.75831	27.38	1.9696	1.95971
27.4	3.44202	4.06884	27.4	1.99133	1.96617
27.42	3.45412	4.06564	27.42	1.93773	2.45569
27.44	3.4753	3.97372	27.44	1.97474	2.20717
27.46	3.43906	4.04331	27.46	2.02711	2.29305
27.48	3.41032	4.04032	27.48	2.02933	2.51176
27.5	3.49027	3.94819	27.5	1.99371	2.64473
27.52	3.45329	3.87984	27.52	2.01888	2.42761
27.54	3.45861	3.94077	27.54	2.16207	2.18822
27.56	3.44609	4.05525	27.56	1.99792	1.98303
27.58	3.4838	4.02607	27.58	1.99491	1.88598
27.6	3.49053	3.95313	27.6	1.98073	1.88767
27.62	3.45322	4.1205	27.62	2.07501	2.15173
27.64	3.46902	4.05318	27.64	2.08529	2.02459
27.66	3.43632	4.09762	27.66	2.07123	2.10933
27.68	3.4745	4.12144	27.68	1.947	1.88774
27.7	3.43278	4.00016	27.7	1.89241	2.08156
27.72	3.39324	4.15259	27.72	2.05132	2.05748
27.74	3.38776	4.1117	27.74	2.12445	1.99766
27.76	3.38352	4.02923	27.76	2.07202	1.91835
27.78	3.42298	4.13522	27.78	2.12352	2.50581
27.8	3.3886	4.181	27.8	2.07351	2.36434
27.82	3.42049	3.85311	27.82	2.07981	2.42232
27.84	3.34513	3.82584	27.84	2.03519	1.98543
27.86	3.32593	3.93187	27.86	2.12608	2.66946
27.88	3.44658	4.00904	27.88	1.8998	2.21844
27.9	3.3722	3.99256	27.9	1.96855	2.23982
27.92	3.48212	3.89023	27.92	2.02343	2.18864
27.94	3.41449	3.82127	27.94	1.91331	2.31624
27.96	3.36713	3.9774	27.96	1.8918	2.33255
27.98	3.44659	3.92932	27.98	1.97392	2.24678
28	3.36848	3.96778	28	1.91254	1.99127
28.02	3.4711	3.73812	28.02	1.94881	2.31902
28.04	3.4597	3.61447	28.04	1.99124	2.45843
28.06	3.36721	3.68662	28.06	2.04145	2.09694
28.08	3.43554	3.90999	28.08	2.05978	2.08641
28.1	3.41357	3.71805	28.1	2.1064	2.25604
28.12	3.40297	3.933	28.12	2.17294	2.02626
28.14	3.34547	3.92615	28.14	2.02578	2.22395
28.16	3.36861	4.00345	28.16	2.09128	2.39492
28.18	3.32654	3.77857	28.18	2.03442	1.92371
28.2	3.29259	3.87977	28.2	2.02957	2.55626
28.22	3.37614	3.95066	28.22	1.94929	2.0537
28.24	3.31488	3.95436	28.24	1.90073	2.57204
28.26	3.40074	3.84049	28.26	1.94987	2.19705
28.28	3.29629	3.79988	28.28	2.06535	2.00519
28.3	3.34859	4.04264	28.3	2.03899	2.04365
28.32	3.2381	4.02372	28.32	2.06662	2.15273
28.34	3.29279	4.0036	28.34	2.0391	2.16398
28.36	3.33466	3.82058	28.36	2.14584	2.30123
28.38	3.34692	3.87066	28.38	2.15795	2.42358
28.4	3.29558	3.99799	28.4	2.10195	2.46392
28.42	3.27886	3.78622	28.42	2.05615	2.65307
28.44	3.35605	4.26694	28.44	2.09478	2.10092
28.46	3.30671	4.04203	28.46	2.07676	2.27002
28.48	3.31142	3.97115	28.48	2.07365	2.43116
28.5	3.33995	3.82407	28.5	2.01315	2.22438
28.52	3.31699	3.90713	28.52	1.97983	2.29347
28.54	3.2792	3.87928	28.54	1.98871	2.11588
28.56	3.36175	3.8593	28.56	2.05027	1.88981
28.58	3.32127	3.93798	28.58	2.03934	2.1027
28.6	3.30791	3.85522	28.6	1.89153	2.20428
28.62	3.36836	3.74314	28.62	2.04468	2.28631
28.64	3.21784	3.88531	28.64	1.86575	2.03277
28.66	3.29438	3.83037	28.66	1.84349	2.23472
28.68	3.33265	3.80629	28.68	1.76683	1.9192
28.7	3.28941	3.9282	28.7	1.74896	1.87134
28.72	3.26467	3.64564	28.72	1.87387	1.92482
28.74	3.29931	3.87993	28.74	1.91114	1.94852
28.76	3.3613	4.04979	28.76	1.92284	2.04204
28.78	3.34163	3.97429	28.78	1.79221	2.5596
28.8	3.43792	3.9055	28.8	1.8998	1.89511
28.82	3.35068	3.99858	28.82	1.78979	1.97183
28.84	3.36043	4.07891	28.84	1.75308	1.95108
28.86	3.32719	3.76201	28.86	1.83208	2.09969
28.88	3.27579	4.04884	28.88	1.85963	2.08957
28.9	3.34558	3.94629	28.9	1.80784	2.07083
28.92	3.34753	3.84732	28.92	1.72854	1.96568
28.94	3.39944	3.82698	28.94	1.80027	1.95607
28.96	3.37901	3.82271	28.96	1.74469	1.81134
28.98	3.40375	4.05062	28.98	1.76214	1.8256
29	3.38336	4.13725	29	1.73271	1.91137
29.02	3.43548	3.90785	29.02	1.72989	2.02262
29.04	3.49138	3.97479	29.04	1.89459	2.23102
29.06	3.41597	3.96615	29.06	1.8236	1.78871
29.08	3.35272	3.86373	29.08	1.79648	2.11232
29.1	3.34018	3.81528	29.1	1.7532	2.00797
29.12	3.45528	3.90306	29.12	1.81794	2.15773
29.14	3.40434	3.9088	29.14	1.81329	2.17145
29.16	3.44316	4.0527	29.16	1.76841	2.3343
29.18	3.45635	3.80384	29.18	1.81501	2.43293
29.2	3.43701	3.89984	29.2	1.84629	2.14996
29.22	3.35014	3.93436	29.22	1.73798	1.90782
29.24	3.39213	4.02107	29.24	1.69821	1.92149
29.26	3.38917	3.77331	29.26	1.67733	2.09459
29.28	3.4097	3.61064	29.28	1.74072	2.13815
29.3	3.33867	3.47127	29.3	1.82076	2.02074
29.32	3.40792	3.72928	29.32	1.88188	2.31825
29.34	3.38777	3.5002	29.34	1.66968	2.12382
29.36	3.3815	3.3312	29.36	1.89885	1.88064
29.38	3.36972	3.53739	29.38	1.87291	2.0403
29.4	3.42815	3.68335	29.4	1.90102	1.974
29.42	3.42817	3.79585	29.42	1.92147	1.67242
29.44	3.3682	3.69381	29.44	1.96061	1.65334
29.46	3.38429	3.87662	29.46	1.91416	2.10423
29.48	3.39783	3.7573	29.48	1.8006	1.69659
29.5	3.35918	3.88811	29.5	1.89779	2.19709
29.52	3.41327	3.4935	29.52	1.92253	1.87784
29.54	3.3904	3.40443	29.54	1.951	1.84546
29.56	3.31374	3.78281	29.56	1.98389	2.04638
29.58	3.32265	3.41118	29.58	1.87871	2.22123
29.6	3.36697	3.2506	29.6	1.86344	2.06156
29.62	3.39285	3.48548	29.62	1.88478	2.00815
29.64	3.44412	3.15802	29.64	1.83602	2.22455
29.66	3.4548	3.15938	29.66	1.85651	1.91649
29.68	3.41226	3.18772	29.68	1.7908	1.90233
29.7	3.34808	3.30283	29.7	1.81364	3.16075
29.72	3.36254	3.37505	29.72	2.00525	3.42171
29.74	3.35891	3.24185	29.74	1.81767	3.25335
29.76	3.35673	3.27942	29.76	1.91755	2.71015
29.78	3.36981	3.11049	29.78	1.98796	2.38984
29.8	3.37785	3.21054	29.8	2.11349	2.2942
29.82	3.32809	3.1838	29.82	1.98732	2.07209
29.84	3.33231	3.3469	29.84	2.11452	2.05643
29.86	3.45983	3.28257	29.86	2.08154	1.81386
29.88	3.39317	3.26173	29.88	1.98516	2.39206
29.9	3.38488	3.23885	29.9	1.91389	2.15946
29.92	3.38141	3.17631	29.92	1.90156	2.31064
29.94	3.39837	3.35404	29.94	1.91314	2.79631
29.96	3.46552	3.25263	29.96	1.80634	1.96947
29.98	3.45402	3.19946	29.98	1.85939	3.22272
30	3.43986	3.12599	30	1.88728	3.42398
30.02	3.37315	3.18007	30.02	1.87551	2.47646
30.04	3.43617	3.21985	30.04	1.84424	1.77595
30.06	3.38784	3.11673	30.06	1.87368	2.28222
30.08	3.41099	3.23666	30.08	1.86042	2.59787
30.1	3.42143	3.26634	30.1	1.73199	2.64437
30.12	3.42479	3.22927	30.12	1.67098	2.54334
30.14	3.37379	3.32028	30.14	1.76357	2.21919
30.16	3.42174	3.11404	30.16	1.884	2.33642
30.18	3.42838	3.21778	30.18	1.76947	2.38335
30.2	3.3339	3.35202	30.2	1.721	2.66238
30.22	3.32999	3.36226	30.22	1.82482	2.27332
30.24	3.3499	3.33714	30.24	1.81885	2.25211
30.26	3.38717	3.43007	30.26	1.82266	2.79737
30.28	3.37797	3.23111	30.28	1.79651	2.8628
30.3	3.35415	3.30713	30.3	1.83897	2.98252
30.32	3.36441	3.42689	30.32	1.82095	2.9374
30.34	3.35089	3.55242	30.34	1.80448	3.07722
30.36	3.40397	3.07985	30.36	1.8008	3.12947
30.38	3.4258	3.10514	30.38	1.77291	3.24168
30.4	3.32751	3.24103	30.4	1.77463	2.67365
30.42	3.39431	3.24469	30.42	1.79434	2.82139
30.44	3.41086	3.24481	30.44	1.76985	2.86021
30.46	3.33069	3.54077	30.46	1.89446	3.34138
30.48	3.33483	3.43747	30.48	1.83661	2.5367
30.5	3.31079	3.59683	30.5	1.87315	2.92492
30.52	3.26655	3.5801	30.52	1.93172	2.86763
30.54	3.35668	3.38405	30.54	1.92984	3.65336
30.56	3.3423	3.4589	30.56	1.89922	3.09523
30.58	3.31421	3.73706	30.58	1.85314	3.3616
30.6	3.39983	3.88033	30.6	1.91155	3.4846
30.62	3.39663	3.77196	30.62	1.91239	3.37192
30.64	3.37704	3.51404	30.64	1.96327	2.40384
30.66	3.3831	3.47723	30.66	1.97037	1.44697
30.68	3.35152	3.60949	30.68	2.03966	1.8823
30.7	3.32655	3.36111	30.7	1.86751	2.42867
30.72	3.34982	3.64766	30.72	1.98223	2.45293
30.74	3.31715	4.02088	30.74	2.00777	2.74418
30.76	3.47966	3.94041	30.76	2.15183	2.46858
30.78	3.48847	3.71536	30.78	2.06767	2.62523
30.8	3.40896	4.105	30.8	1.97025	2.34909
30.82	3.39232	3.95576	30.82	2.05893	2.48318
30.84	3.36935	3.83658	30.84	1.94751	2.47762
30.86	3.35332	3.9121	30.86	2.00685	2.23647
30.88	3.35095	3.64458	30.88	2.05147	2.07184
30.9	3.37285	3.7934	30.9	1.96085	2.32025
30.92	3.37601	3.46465	30.92	1.90875	2.16778
30.94	3.39081	3.4984	30.94	1.84932	2.34341
30.96	3.41273	3.33948	30.96	1.98689	2.63572
30.98	3.28685	3.29404	30.98	1.98558	2.57151
31	3.29945	3.29955	31	1.99141	2.87361
31.02	3.36908	3.24181	31.02	1.91963	2.66418
31.04	3.34902	3.06209	31.04	2.08693	2.87319
31.06	3.35454	3.27846	31.06	1.99858	2.34854
31.08	3.34835	3.28008	31.08	2.22856	2.53427
31.1	3.35488	3.27867	31.1	2.13844	1.63012
31.12	3.29053	3.43397	31.12	2.23225	2.32545
31.14	3.40194	3.33229	31.14	2.13631	1.87024
31.16	3.34084	3.13293	31.16	2.16904	2.57664
31.18	3.41671	3.30153	31.18	2.03847	2.58496
31.2	3.26139	3.14143	31.2	2.09011	2.30579
31.22	3.39447	3.34245	31.22	2.10853	2.58589
31.24	3.41048	3.72568	31.24	2.17535	2.09208
31.26	3.37196	3.46173	31.26	2.17504	2.65095
31.28	3.32249	3.23941	31.28	2.1057	2.72695
31.3	3.36019	3.38759	31.3	2.23802	2.57743
31.32	3.35794	3.4948	31.32	2.06902	2.20169
31.34	3.32456	3.44147	31.34	2.05365	2.33856
31.36	3.34439	3.50469	31.36	2.11769	2.20069
31.38	3.41302	3.09072	31.38	1.95127	2.73129
31.4	3.43185	3.06629	31.4	2.04504	2.4839
31.42	3.4707	3.4436	31.42	2.01112	2.15441
31.44	3.48624	3.34693	31.44	1.91803	2.48065
31.46	3.41473	3.55653	31.46	1.95609	2.42996
31.48	3.39037	3.46741	31.48	1.94909	2.35981
31.5	3.45843	3.59171	31.5	2.02297	2.37648
31.52	3.40962	3.29947	31.52	2.17165	2.23469
31.54	3.379	3.11702	31.54	2.02658	2.61258
31.56	3.40754	3.24527	31.56	2.20823	2.38275
31.58	3.39278	2.99232	31.58	2.29794	2.4291
31.6	3.3873	3.24961	31.6	2.16056	2.5368
31.62	3.36634	3.36215	31.62	2.20128	2.5793
31.64	3.4339	3.27099	31.64	2.28023	2.3786
31.66	3.41095	3.42161	31.66	2.24293	2.79095
31.68	3.3685	3.2718	31.68	2.10926	2.73515
31.7	3.40759	3.24665	31.7	2.06792	2.9952
31.72	3.44594	3.15811	31.72	2.10825	2.84628
31.74	3.46982	3.07834	31.74	2.08841	2.74653
31.76	3.43546	3.19609	31.76	1.94419	2.41881
31.78	3.36755	3.29345	31.78	2.11147	2.49808
31.8	3.50453	3.32255	31.8	2.07196	2.63056
31.82	3.45461	3.32788	31.82	1.94821	2.68349
31.84	3.47969	3.51338	31.84	1.97192	2.63371
31.86	3.40894	3.43131	31.86	1.98204	2.3435
31.88	3.37851	3.60131	31.88	1.99445	2.50876
31.9	3.32199	3.29393	31.9	1.94772	1.95881
31.92	3.30856	3.40863	31.92	2.01448	2.43458
31.94	3.40054	3.32175	31.94	1.93189	2.26619
31.96	3.44317	3.36188	31.96	1.99897	2.18244
31.98	3.38543	3.41112	31.98	1.98982	2.30572
32	3.44617	3.56083	32	1.94814	2.22514
32.02	3.40614	3.43305	32.02	1.85927	1.66442
32.04	3.42861	3.25957	32.04	1.83052	2.61975
32.06	3.34699	3.39667	32.06	1.85026	3.2701
32.08	3.32629	3.38813	32.08	1.96114	2.78736
32.1	3.3385	3.70092	32.1	1.90288	2.60548
32.12	3.35449	3.61383	32.12	1.89114	2.83344
32.14	3.30288	3.2709	32.14	1.90881	2.56795
32.16	3.34854	3.13116	32.16	1.83962	2.66284
32.18	3.40206	3.26017	32.18	1.85495	2.54332
32.2	3.34526	3.26321	32.2	1.89513	2.40336
32.22	3.43861	3.39239	32.22	1.86973	2.71906
32.24	3.41163	3.30568	32.24	1.84263	2.67326
32.26	3.42189	3.41365	32.26	1.83665	2.65647
32.28	3.35803	3.27373	32.28	2.03325	3.34289
32.3	3.45767	3.31617	32.3	2.02322	3.2765
32.32	3.47275	3.35269	32.32	1.89465	3.05676
32.34	3.38545	3.30465	32.34	1.86383	3.36377
32.36	3.43556	3.17388	32.36	1.87168	2.68644
32.38	3.45481	3.26359	32.38	1.82858	2.76957
32.4	3.43614	3.32086	32.4	1.88223	3.15986
32.42	3.38608	3.42955	32.42	1.88306	2.79729
32.44	3.42755	3.38309	32.44	1.78159	2.20226
32.46	3.36525	3.19304	32.46	1.83581	2.54698
32.48	3.46592	3.27024	32.48	1.83745	2.01205
32.5	3.438	3.44375	32.5	1.76763	2.09853
32.52	3.46017	3.59544	32.52	1.71686	2.15552
32.54	3.41224	3.51038	32.54	1.76617	1.69451
32.56	3.37832	3.28147	32.56	1.79781	1.56433
32.58	3.37108	3.36758	32.58	1.69006	1.78131
32.6	3.42399	3.38697	32.6	1.84842	2.62962
32.62	3.47846	3.46366	32.62	1.7633	1.56397
32.64	3.4258	3.32166	32.64	1.66716	1.53508
32.66	3.38592	3.26507	32.66	1.78894	1.61599
32.68	3.38745	3.56717	32.68	1.75011	2.61142
32.7	3.36452	3.32954	32.7	1.83628	1.95756
32.72	3.2846	3.58344	32.72	1.72734	2.55249
32.74	3.34452	3.25228	32.74	1.85848	2.69402
32.76	3.38271	3.33317	32.76	1.82333	2.28052
32.78	3.32454	3.03096	32.78	1.77598	2.71435
32.8	3.4698	3.31398	32.8	1.90852	2.92101
32.82	3.40488	3.08664	32.82	1.82538	2.96038
32.84	3.3806	2.95906	32.84	1.88765	2.91408
32.86	3.44589	3.10893	32.86	1.748	2.74633
32.88	3.44903	2.81751	32.88	1.86088	1.78105
32.9	3.37046	3.24928	32.9	1.77263	1.50531
32.92	3.37843	3.48469	32.92	1.78382	1.63868
32.94	3.49186	3.31403	32.94	1.83286	1.3557
32.96	3.41805	3.23499	32.96	1.68312	1.37942
32.98	3.52944	3.43497	32.98	1.74971	1.70815
33	3.58277	3.28127	33	1.80224	2.5604
33.02	3.6187	3.42809	33.02	1.77655	2.63234
33.04	3.57941	3.42358	33.04	1.7021	2.54041
33.06	3.5929	3.24697	33.06	1.82438	2.51793
33.08	3.44654	3.29265	33.08	1.86096	2.77089
33.1	3.54667	3.32679	33.1	1.95694	2.7025
33.12	3.55682	3.14323	33.12	1.93377	3.35743
33.14	3.56085	3.18913	33.14	1.9341	2.55182
33.16	3.45143	3.14358	33.16	1.95154	2.44169
33.18	3.42212	3.19839	33.18	1.93038	2.22304
33.2	3.38781	3.2977	33.2	1.82267	2.41383
33.22	3.53276	2.90822	33.22	1.84738	1.94865
33.24	3.39547	3.16322	33.24	1.70121	2.09493
33.26	3.60785	2.95873	33.26	1.74978	1.9818
33.28	3.48695	3.45935	33.28	1.74843	2.02684
33.3	3.50811	3.31597	33.3	1.831	2.46447
33.32	3.53407	3.4701	33.32	1.82374	2.15433
33.34	3.55969	3.33491	33.34	1.74093	1.51526
33.36	3.46029	3.13544	33.36	1.69815	1.56473
33.38	3.43666	3.34699	33.38	1.74771	2.27415
33.4	3.48555	3.15518	33.4	1.77438	2.81618
33.42	3.46245	3.1395	33.42	1.85694	2.99959
33.44	3.44152	3.10026	33.44	1.80893	3.02126
33.46	3.5106	2.79261	33.46	1.81042	3.16924
33.48	3.50356	2.55907	33.48	1.89598	2.77839
33.5	3.54628	3.0091	33.5	1.85862	2.37216
33.52	3.57828	3.04062	33.52	1.80869	1.8649
33.54	3.53008	3.03028	33.54	1.78311	2.45892
33.56	3.66955	3.10619	33.56	1.88577	2.2809
33.58	3.57117	2.84842	33.58	1.86818	1.7676
33.6	3.50024	2.69425	33.6	1.79374	2.32067
33.62	3.445	2.88349	33.62	1.82245	2.66378
33.64	3.62968	3.1333	33.64	1.84896	2.75994
33.66	3.53034	3.0389	33.66	1.75986	2.43254
33.68	3.50121	2.7182	33.68	1.7959	2.65133
33.7	3.49009	2.83213	33.7	1.98972	2.43189
33.72	3.49909	2.76123	33.72	1.85099	2.49978
33.74	3.57554	3.04966	33.74	1.85869	2.96078
33.76	3.5293	2.77235	33.76	1.90525	3.2775
33.78	3.50136	2.52539	33.78	1.9186	3.19665
33.8	3.5107	2.60647	33.8	1.87001	3.12107
33.82	3.46695	2.36119	33.82	1.92572	3.04069
33.84	3.50499	2.97138	33.84	1.83566	3.31468
33.86	3.46015	2.54905	33.86	2.0567	3.51362
33.88	3.53638	2.91579	33.88	2.02147	3.40474
33.9	3.58645	2.58007	33.9	1.94394	3.4439
33.92	3.46192	2.70933	33.92	1.94715	3.50873
33.94	3.53966	2.83172	33.94	1.97766	2.73792
33.96	3.50691	2.83149	33.96	1.99749	2.86415
33.98	3.46178	2.4723	33.98	1.92031	2.18142
34	3.50145	2.72886	34	1.87155	2.6718
34.02	3.5268	2.70374	34.02	1.79022	2.85069
34.04	3.49256	2.95653	34.04	1.78195	2.80652
34.06	3.47559	3.00079	34.06	1.84649	2.4336
34.08	3.48827	2.9563	34.08	1.90249	2.8662
34.1	3.46753	2.80218	34.1	1.87389	2.48306
34.12	3.54522	2.67625	34.12	1.99693	2.41718
34.14	3.559	3.16285	34.14	1.96235	2.56517
34.16	3.45978	2.99273	34.16	1.89476	2.44784
34.18	3.53801	3.35479	34.18	1.88839	2.09149
34.2	3.58376	2.83758	34.2	1.92591	1.49348
34.22	3.48221	2.92853	34.22	2.07148	1.62728
34.24	3.49126	3.13636	34.24	2.09348	2.13889
34.26	3.49407	2.84933	34.26	2.07423	1.52246
34.28	3.44085	3.21874	34.28	2.03483	2.81325
34.3	3.52219	3.04946	34.3	2.08783	3.28652
34.32	3.59658	2.85235	34.32	2.02407	3.31597
34.34	3.58855	2.86396	34.34	2.06626	3.23991
34.36	3.54032	2.8037	34.36	1.94775	3.36297
34.38	3.61464	2.84886	34.38	2.28254	2.89342
34.4	3.55175	2.57492	34.4	2.11719	2.69942
34.42	3.47244	2.72107	34.42	2.02528	2.97391
34.44	3.53437	2.76701	34.44	2.13463	3.10764
34.46	3.49072	2.83805	34.46	2.07347	3.6197
34.48	3.51866	2.90347	34.48	1.95152	3.66351
34.5	3.60619	2.95689	34.5	1.80935	3.52865
34.52	3.5335	2.89171	34.52	1.8707	3.70046
34.54	3.54333	2.92876	34.54	1.86739	3.101
34.56	3.5761	2.80705	34.56	1.96481	2.75658
34.58	3.54675	2.92748	34.58	2.04174	2.55337
34.6	3.55894	3.17752	34.6	1.73667	2.63
34.62	3.55756	2.85564	34.62	1.80977	2.50018
34.64	3.57124	2.74519	34.64	1.84808	2.25954
34.66	3.58027	2.83372	34.66	1.84551	2.51919
34.68	3.51243	3.03361	34.68	1.88459	2.92402
34.7	3.59182	2.96088	34.7	1.8174	3.0397
34.72	3.62412	3.11665	34.72	2.01965	3.09792
34.74	3.65767	3.10549	34.74	1.92268	3.34104
34.76	3.56659	3.46069	34.76	1.80956	2.81851
34.78	3.63163	3.05541	34.78	1.8976	2.42413
34.8	3.58387	3.11292	34.8	2.0559	2.05518
34.82	3.6487	3.0259	34.82	1.9886	2.24681
34.84	3.60185	3.37356	34.84	2.05839	2.46095
34.86	3.63249	3.19685	34.86	2.0254	1.6687
34.88	3.71193	3.24481	34.88	1.86176	2.21647
34.9	3.65405	3.16154	34.9	1.85791	1.62508
34.92	3.61081	2.98576	34.92	1.87126	1.5133
34.94	3.61635	2.85049	34.94	1.82286	1.50034
34.96	3.61976	3.17154	34.96	1.81578	2.28654
34.98	3.63825	2.97455	34.98	1.83408	2.48099
35	3.57921	2.91942	35	1.90192	1.99523
35.02	3.62774	3.01726	35.02	1.79233	2.28496
35.04	3.56651	3.20404	35.04	1.80213	1.92472
35.06	3.61966	2.89268	35.06	1.71374	1.92552
35.08	3.56753	3.22574	35.08	1.81581	2.03577
35.1	3.53209	3.10852	35.1	1.95868	2.29457
35.12	3.57645	3.10975	35.12	1.91444	2.2633
35.14	3.5869	3.16351	35.14	1.90873	2.02682
35.16	3.56188	3.42914	35.16	1.92654	2.38185
35.18	3.51335	3.42007	35.18	1.85235	2.75581
35.2	3.47584	3.15736	35.2	1.79272	2.70792
35.22	3.52934	3.28395	35.22	1.79992	2.61944
35.24	3.55139	3.00876	35.24	1.90906	2.33755
35.26	3.53255	2.97621	35.26	1.82616	2.26285
35.28	3.47011	3.13353	35.28	1.99913	1.71243
35.3	3.53592	3.21443	35.3	1.88751	2.40866
35.32	3.5383	3.21734	35.32	1.85239	2.11319
35.34	3.55235	2.96037	35.34	1.99681	1.71882
35.36	3.52899	3.1699	35.36	2.05394	1.58014
35.38	3.57898	2.78845	35.38	1.8848	1.26896
35.4	3.55722	3.08349	35.4	1.90272	1.63894
35.42	3.5251	3.19548	35.42	1.84055	1.28443
35.44	3.49439	3.1438	35.44	1.86678	1.54273
35.46	3.52972	3.22536	35.46	1.91185	2.20259
35.48	3.47118	3.31225	35.48	1.98086	2.04009
35.5	3.54272	3.17694	35.5	1.91023	1.64089
35.52	3.53098	3.18069	35.52	2.06444	1.4972
35.54	3.53573	3.09577	35.54	1.984	1.75667
35.56	3.52262	3.26336	35.56	1.77457	1.34672
35.58	3.58843	3.26071	35.58	1.83853	1.58665
35.6	3.53766	3.15771	35.6	1.87671	1.61239
35.62	3.57452	2.95418	35.62	1.93415	1.85563
35.64	3.54229	3.07607	35.64	1.98208	1.25577
35.66	3.45097	3.21163	35.66	1.98517	1.52805
35.68	3.55957	3.16644	35.68	1.88706	1.97608
35.7	3.52187	3.04034	35.7	1.9202	2.16875
35.72	3.53015	2.96508	35.72	1.82302	2.13618
35.74	3.60978	2.93777	35.74	1.96342	1.97783
35.76	3.6832	2.80707	35.76	1.99956	2.41121
35.78	3.60114	3.11495	35.78	1.93773	1.74923
35.8	3.61867	3.03174	35.8	1.95981	1.91427
35.82	3.63884	2.57959	35.82	2.04919	1.77485
35.84	3.64218	2.92495	35.84	1.90833	1.55401
35.86	3.60216	2.63505	35.86	1.98838	1.858
35.88	3.55706	2.70241	35.88	1.9878	1.73732
35.9	3.56758	2.69214	35.9	1.85308	1.61142
35.92	3.55264	2.85139	35.92	1.82744	1.53107
35.94	3.60399	2.70048	35.94	1.89986	2.23924
35.96	3.61901	3.09228	35.96	2.10365	2.97007
35.98	3.65382	3.1257	35.98	2.04191	2.87971
36	3.55862	3.04076	36	1.98453	2.27119
36.02	3.56545	3.23916	36.02	1.91511	2.57979
36.04	3.58348	3.21837	36.04	2.00611	2.52293
36.06	3.63341	3.15472	36.06	1.95411	2.17896
36.08	3.62067	3.30401	36.08	2.0696	1.98712
36.1	3.51875	3.27269	36.1	1.95494	2.14399
36.12	3.55261	3.36303	36.12	1.87774	2.90025
36.14	3.60202	3.89555	36.14	2.13622	2.11649
36.16	3.66692	3.3178	36.16	1.95745	2.0902
36.18	3.66815	3.34346	36.18	1.96052	1.82821
36.2	3.63485	3.21572	36.2	1.75529	1.96208
36.22	3.5778	2.91106	36.22	1.85643	2.44595
36.24	3.65027	3.27436	36.24	1.98033	2.34608
36.26	3.5985	3.00445	36.26	1.8312	2.39876
36.28	3.66543	3.15062	36.28	1.97531	2.36133
36.3	3.70173	2.85325	36.3	1.99932	2.4529
36.32	3.67194	2.87072	36.32	1.90523	1.83898
36.34	3.67601	2.95155	36.34	2.00702	2.27305
36.36	3.60317	2.80228	36.36	1.9966	1.90478
36.38	3.56309	2.69674	36.38	2.06815	1.62893
36.4	3.62227	2.83829	36.4	1.94217	1.71201
36.42	3.67786	2.97752	36.42	2.1041	1.74613
36.44	3.70891	2.9636	36.44	1.93437	1.598
36.46	3.66403	2.91292	36.46	2.11472	1.376
36.48	3.67759	3.2664	36.48	2.07437	2.22908
36.5	3.64516	2.97729	36.5	2.06907	1.89724
36.52	3.56339	3.11032	36.52	2.12895	1.54377
36.54	3.61144	3.24018	36.54	2.04238	1.76264
36.56	3.51431	3.21753	36.56	2.01307	1.56365
36.58	3.47729	3.31434	36.58	2.02747	1.66397
36.6	3.54745	3.19814	36.6	1.93502	1.43327
36.62	3.62165	2.77641	36.62	2.06786	1.4766
36.64	3.53664	2.85251	36.64	2.10729	1.29427
36.66	3.55569	2.85181	36.66	2.14002	1.95597
36.68	3.56933	3.01528	36.68	2.06584	1.65322
36.7	3.58961	2.86298	36.7	1.93753	1.4545
36.72	3.60048	2.63634	36.72	2.05216	1.34898
36.74	3.57136	2.53514	36.74	1.99059	1.44621
36.76	3.52429	2.44957	36.76	1.97558	2.46293
36.78	3.58823	2.49948	36.78	1.91024	2.07798
36.8	3.60233	2.58159	36.8	1.90822	1.54124
36.82	3.5144	2.86554	36.82	1.87932	1.258
36.84	3.581	2.75429	36.84	1.88107	1.54616
36.86	3.57938	2.49463	36.86	1.96096	1.71871
36.88	3.60946	2.83604	36.88	2.01182	1.32953
36.9	3.54872	2.75846	36.9	1.88818	2.38827
36.92	3.49072	3.17429	36.92	1.96529	1.58961
36.94	3.54789	2.6152	36.94	2.01981	1.38773
36.96	3.57525	2.60248	36.96	2.01456	1.81139
36.98	3.61826	3.04568	36.98	2.10155	1.85123
37	3.53653	2.80283	37	2.16079	1.49185
37.02	3.54274	2.81611	37.02	1.95307	1.77284
37.04	3.45603	2.80346	37.04	2.00612	1.70959
37.06	3.49385	2.90439	37.06	2.05147	2.4007
37.08	3.60916	2.81992	37.08	2.04939	2.35598
37.1	3.56294	2.73105	37.1	1.97361	2.40876
37.12	3.60338	2.6511	37.12	2.05137	2.4021
37.14	3.61975	2.80028	37.14	2.0405	2.6487
37.16	3.66429	3.07183	37.16	1.99664	2.63233
37.18	3.56371	2.91983	37.18	2.07343	2.79173
37.2	3.58742	2.72234	37.2	2.15107	2.21174
37.22	3.48261	2.71916	37.22	1.98888	2.58775
37.24	3.51873	2.53649	37.24	2.0371	2.6141
37.26	3.48678	2.4816	37.26	1.98849	2.67139
37.28	3.5174	2.80322	37.28	2.05807	2.629
37.3	3.44518	2.57944	37.3	2.03312	2.29241
37.32	3.53514	2.65408	37.32	2.07334	2.44379
37.34	3.57114	2.1766	37.34	2.22772	2.64073
37.36	3.60088	2.35389	37.36	2.08606	2.43641
37.38	3.57735	2.94172	37.38	2.19301	2.43315
37.4	3.62732	3.07146	37.4	2.19835	2.55725
37.42	3.59384	2.71057	37.42	2.12743	2.4117
37.44	3.5862	2.55567	37.44	2.17381	2.26425
37.46	3.46779	2.78078	37.46	2.18817	2.55785
37.48	3.51711	2.645	37.48	2.08963	2.55937
37.5	3.46209	2.87893	37.5	2.11344	2.61887
37.52	3.40873	3.16149	37.52	2.16829	2.98159
37.54	3.50306	2.99309	37.54	2.15984	2.62601
37.56	3.49802	2.60732	37.56	2.10158	2.56645
37.58	3.43011	2.82255	37.58	2.14779	2.06669
37.6	3.41953	2.47051	37.6	2.06123	1.96605
37.62	3.55808	2.83712	37.62	1.94888	2.46973
37.64	3.45768	3.20051	37.64	2.0818	1.95549
37.66	3.44696	2.55231	37.66	2.14072	1.63453
37.68	3.50924	2.44976	37.68	2.26377	2.43654
37.7	3.51451	2.84449	37.7	2.08844	1.77825
37.72	3.48289	3.02767	37.72	2.14538	2.10311
37.74	3.52663	3.15173	37.74	2.19716	2.04052
37.76	3.57547	4.06862	37.76	2.27008	2.04511
37.78	3.47344	3.85487	37.78	2.16347	2.23032
37.8	3.50326	3.7611	37.8	2.0464	1.98644
37.82	3.54715	3.40818	37.82	2.08004	2.61743
37.84	3.50151	3.95547	37.84	2.04407	2.3435
37.86	3.46697	4.03724	37.86	2.00353	2.22154
37.88	3.53247	4.15325	37.88	2.04278	2.06856
37.9	3.46207	3.92669	37.9	2.02403	2.24982
37.92	3.39811	3.55717	37.92	2.01186	1.80997
37.94	3.48049	3.77837	37.94	1.96277	2.22317
37.96	3.57851	4.17452	37.96	2.12287	2.32851
37.98	3.56442	3.98681	37.98	2.1325	2.27191
38	3.6637	4.022	38	2.16684	2.28586
38.02	3.6633	4.06482	38.02	2.03358	2.42499
38.04	3.59466	4.10544	38.04	1.99936	2.24843
38.06	3.57971	4.07649	38.06	1.91111	2.42407
38.08	3.60376	4.06499	38.08	2.00942	2.32197
38.1	3.6341	3.9417	38.1	2.08063	2.0116
38.12	3.64731	4.05721	38.12	1.89822	2.07399
38.14	3.58832	3.73549	38.14	1.92756	1.66134
38.16	3.66141	3.79128	38.16	1.99906	1.89726
38.18	3.63612	3.54409	38.18	1.97022	1.73767
38.2	3.65153	3.78276	38.2	2.05109	2.6135
38.22	3.63337	3.71793	38.22	1.99229	2.3788
38.24	3.63717	3.79379	38.24	2.15374	1.92636
38.26	3.67879	3.38096	38.26	2.30869	1.89024
38.28	3.70705	3.56054	38.28	2.34524	2.19355
38.3	3.57966	3.38991	38.3	2.17982	2.24147
38.32	3.61321	3.94458	38.32	2.00335	2.16373
38.34	3.56643	4.0582	38.34	2.01827	2.16197
38.36	3.60193	4.11326	38.36	2.18648	1.96053
38.38	3.67891	3.8285	38.38	2.21524	2.11197
38.4	3.63118	3.8038	38.4	2.14891	2.29456
38.42	3.56617	3.80981	38.42	2.03109	2.32752
38.44	3.59532	4.05546	38.44	2.11214	2.64148
38.46	3.59121	3.80749	38.46	2.02571	2.42729
38.48	3.56946	3.71376	38.48	1.9771	2.36787
38.5	3.60484	3.97708	38.5	2.11609	2.00419
38.52	3.59307	4.14166	38.52	2.06031	1.76879
38.54	3.60452	3.89222	38.54	2.07336	2.14798
38.56	3.68112	3.78669	38.56	2.0806	1.36377
38.58	3.66153	3.70139	38.58	2.03939	2.16543
38.6	3.59939	3.93584	38.6	2.15823	1.42533
38.62	3.59665	4.01467	38.62	2.13828	1.90714
38.64	3.4837	3.3894	38.64	2.09903	2.27072
38.66	3.48536	3.77211	38.66	2.13186	2.27446
38.68	3.60682	4.07976	38.68	2.09889	2.13094
38.7	3.55672	3.83099	38.7	2.09685	2.70766
38.72	3.5469	3.5381	38.72	2.04007	2.96251
38.74	3.59266	4.07244	38.74	2.0662	2.60424
38.76	3.61218	3.96533	38.76	2.16894	3.2718
38.78	3.60196	3.97757	38.78	2.04828	2.79233
38.8	3.59306	4.17689	38.8	2.30365	2.46983
38.82	3.47746	3.70728	38.82	2.1962	2.21548
38.84	3.53497	4.15738	38.84	2.31932	2.21871
38.86	3.46219	3.58289	38.86	2.2252	1.64252
38.88	3.51841	4.08667	38.88	2.2283	2.84664
38.9	3.49973	4.08662	38.9	2.10327	2.20534
38.92	3.53362	4.10894	38.92	2.11542	2.28412
38.94	3.44113	4.00853	38.94	2.0891	2.7364
38.96	3.47961	3.58195	38.96	2.26465	2.52315
38.98	3.40287	3.78618	38.98	2.18545	2.22654
39	3.48609	3.81397	39	2.00637	2.45942
39.02	3.47197	4.12418	39.02	2.08533	2.17209
39.04	3.54825	4.13684	39.04	2.0309	3.19693
39.06	3.52865	3.99275	39.06	2.13501	2.16036
39.08	3.57132	4.12661	39.08	2.03358	2.8998
39.1	3.54517	3.59854	39.1	2.1749	2.31171
39.12	3.55167	3.98107	39.12	2.08378	2.84439
39.14	3.51189	4.12998	39.14	2.12697	3.16018
39.16	3.49404	4.04825	39.16	2.1521	3.16566
39.18	3.38468	3.96818	39.18	2.06689	3.03592
39.2	3.51585	3.84472	39.2	2.01652	3.1197
39.22	3.58317	3.8916	39.22	1.98413	3.14579
39.24	3.53572	4.04296	39.24	1.94355	2.84977
39.26	3.52433	4.00807	39.26	1.95657	3.00665
39.28	3.53596	3.83975	39.28	2.20143	2.84844
39.3	3.56179	3.6744	39.3	2.13369	2.72434
39.32	3.52595	3.76722	39.32	2.08735	2.71746
39.34	3.37092	4.03545	39.34	2.11821	2.73674
39.36	3.49934	3.68107	39.36	2.13414	3.1992
39.38	3.44736	3.72483	39.38	2.01975	3.16436
39.4	3.44721	3.77789	39.4	2.06489	3.32462
39.42	3.45231	3.82152	39.42	2.13097	2.84883
39.44	3.42112	3.78846	39.44	2.10419	3.31549
39.46	3.40204	3.79654	39.46	2.0756	3.54185
39.48	3.46826	3.75292	39.48	1.94768	3.14911
39.5	3.48896	3.72332	39.5	1.95124	3.52459
39.52	3.46686	3.48237	39.52	1.97614	3.50375
39.54	3.44544	3.37057	39.54	1.97153	3.34917
39.56	3.49271	3.47332	39.56	1.90585	3.36537
39.58	3.4313	3.64381	39.58	1.91045	3.4186
39.6	3.47427	3.35835	39.6	1.89569	3.39979
39.62	3.46767	3.81209	39.62	1.88079	3.77202
39.64	3.49453	3.92697	39.64	1.98373	3.47148
39.66	3.43686	3.68753	39.66	1.90591	3.36553
39.68	3.41477	3.83811	39.68	2.03999	3.28905
39.7	3.37576	3.96849	39.7	1.96545	3.17892
39.72	3.40687	3.74379	39.72	2.0691	3.23158
39.74	3.4404	3.69567	39.74	2.09927	3.2902
39.76	3.44913	3.88324	39.76	2.05142	3.06308
39.78	3.37734	3.61625	39.78	2.05816	3.32259
39.8	3.47436	4.12577	39.8	1.96871	3.44289
39.82	3.47804	4.00964	39.82	1.93995	3.24208
39.84	3.51442	4.0337	39.84	1.98932	3.45426
39.86	3.43	3.9487	39.86	1.94697	3.49013
39.88	3.3914	3.93411	39.88	1.92941	3.44702
39.9	3.38731	3.74822	39.9	1.87191	3.56147
39.92	3.43552	4.03199	39.92	1.89321	3.42566
39.94	3.4981	3.84444	39.94	1.94434	3.30055
39.96	3.4563	3.89598	39.96	1.94853	3.20094
39.98	3.47175	3.90932	39.98	1.91828	2.5024
[truncated: 502 more rows]

## Sheet: irbesartan
Time (ns)	protein_ARG1	LIG_Irbesartan	Time (ns)	protein_ARG2	LIG_Irbesartan
0.02	0.873521	0.8372	0.02	0.686051	0.816621
0.04	0.892177	0.929534	0.04	0.66864	1.11253
0.06	1.03995	0.638366	0.06	0.725725	1.01304
0.08	1.07136	0.897762	0.08	0.729641	1.06749
0.1	1.24243	1.33699	0.1	0.779567	1.1557
0.12	1.30979	1.27322	0.12	0.73858	1.09884
0.14	1.22973	1.39918	0.14	0.808342	1.7061
0.16	1.16438	1.2906	0.16	0.842329	1.75658
0.18	1.32343	1.8765	0.18	0.782407	1.57363
0.2	1.45498	1.61836	0.2	0.82997	1.63385
0.22	1.38187	1.4048	0.22	0.846771	1.70106
0.24	1.24854	1.38244	0.24	0.899553	1.62329
0.26	1.31186	1.54806	0.26	0.876638	1.616
0.28	1.33159	1.42942	0.28	0.892307	1.65512
0.3	1.34445	1.61942	0.3	0.895761	1.80999
0.32	1.36299	1.4839	0.32	0.86295	1.76788
0.34	1.28517	1.78236	0.34	0.889564	1.74431
0.36	1.54806	1.82506	0.36	0.923712	1.8141
0.38	1.52562	1.63758	0.38	0.859648	1.80228
0.4	1.58699	1.66265	0.4	0.900065	1.80611
0.42	1.6978	1.69801	0.42	1.00774	1.76477
0.44	2.01421	1.71432	0.44	0.966495	1.7202
0.46	2.01924	1.74091	0.46	0.970502	1.77353
0.48	2.22806	1.74995	0.48	0.892805	1.66913
0.5	2.08947	1.45505	0.5	0.95549	1.9329
0.52	2.06713	1.4871	0.52	0.886108	1.75033
0.54	1.93803	1.67741	0.54	0.943731	1.79463
0.56	1.86899	1.73054	0.56	0.876081	1.66222
0.58	1.96953	1.81775	0.58	0.923172	1.79186
0.6	2.03158	1.72585	0.6	0.940083	1.66671
0.62	1.74161	1.74284	0.62	1.05062	1.69984
0.64	1.63258	1.9366	0.64	0.972366	1.74535
0.66	1.64766	2.31571	0.66	1.05581	1.67587
0.68	1.42918	2.11812	0.68	0.954067	1.63643
0.7	1.44179	2.19043	0.7	0.979127	1.63595
0.72	1.55588	2.30398	0.72	1.06248	1.65279
0.74	1.59875	2.44394	0.74	1.06313	1.60081
0.76	1.62148	2.8342	0.76	1.00903	1.68473
0.78	1.55188	2.62988	0.78	1.06091	1.64517
0.8	1.75343	2.68168	0.8	1.00776	1.8166
0.82	1.64879	2.39192	0.82	1.10587	1.68547
0.84	1.91485	2.72322	0.84	1.11833	1.71157
0.86	1.80268	2.62598	0.86	1.07041	1.68107
0.88	1.96842	2.45935	0.88	1.06547	1.72912
0.9	1.98816	2.564	0.9	1.07924	1.66503
0.92	2.02457	1.5088	0.92	0.994233	1.73287
0.94	2.09855	1.37622	0.94	0.946965	1.66145
0.96	2.02458	1.56163	0.96	1.08283	1.60019
0.98	2.12633	1.8784	0.98	1.03424	1.64996
1	2.16704	2.02983	1	1.00319	1.59085
1.02	2.27782	1.8	1.02	1.07301	1.74384
1.04	1.99659	1.77307	1.04	1.0183	1.72248
1.06	2.07132	1.84155	1.06	1.01207	1.72806
1.08	2.24976	1.75205	1.08	0.985843	1.59781
1.1	2.16374	1.78382	1.1	0.994958	1.63785
1.12	2.61197	1.83806	1.12	1.01889	1.61004
1.14	2.39959	1.94194	1.14	1.05998	1.70267
1.16	2.49986	1.7962	1.16	1.03838	1.69287
1.18	2.4196	1.90605	1.18	1.04282	1.59827
1.2	2.33825	1.74061	1.2	1.02421	1.72319
1.22	2.41328	1.78834	1.22	1.06424	1.73747
1.24	2.33428	1.65642	1.24	1.0059	1.79415
1.26	2.3231	2.00826	1.26	1.05075	1.57992
1.28	2.31988	1.7138	1.28	1.04776	1.57539
1.3	2.28589	1.6556	1.3	1.12151	1.72612
1.32	2.17968	1.63097	1.32	1.09223	1.59051
1.34	2.11569	1.63481	1.34	1.05556	1.65281
1.36	2.02395	1.57859	1.36	1.0345	1.66348
1.38	2.13427	1.86867	1.38	1.06972	1.75722
1.4	1.8243	1.7456	1.4	0.966516	1.58881
1.42	1.68758	1.99939	1.42	1.01834	1.60673
1.44	1.65895	1.92238	1.44	1.03635	1.74972
1.46	1.59586	1.92513	1.46	1.10634	1.74314
1.48	1.48621	1.72298	1.48	1.05281	1.7207
1.5	1.34239	1.59102	1.5	1.0957	1.54739
1.52	1.32437	1.50628	1.52	1.05181	1.60172
1.54	1.51253	1.76912	1.54	1.09485	1.68573
1.56	1.64543	1.51955	1.56	1.098	1.87691
1.58	1.58377	1.68185	1.58	1.0213	1.69316
1.6	1.57979	1.94897	1.6	1.04248	1.85666
1.62	1.52184	1.86928	1.62	1.01061	1.77458
1.64	1.56754	1.6656	1.64	1.08661	1.53999
1.66	1.78611	1.9084	1.66	0.994474	1.67241
1.68	1.85924	1.86191	1.68	0.979221	1.67189
1.7	1.9074	1.51113	1.7	0.952701	1.72135
1.72	2.02714	1.62805	1.72	0.932919	1.64069
1.74	2.01094	2.03095	1.74	0.989698	1.59654
1.76	2.0277	2.0276	1.76	1.0204	1.61458
1.78	2.03258	1.95833	1.78	0.908109	1.82497
1.8	1.90232	2.10568	1.8	1.01302	1.7595
1.82	1.80681	2.17531	1.82	0.989793	1.68389
1.84	1.89339	1.93709	1.84	0.996212	1.69397
1.86	1.88616	2.10095	1.86	1.07685	1.81142
1.88	2.09321	2.60547	1.88	1.02243	1.85571
1.9	1.86974	2.03944	1.9	1.04684	1.70302
1.92	2.04638	2.15799	1.92	1.12251	1.73044
1.94	2.1921	1.97881	1.94	1.04441	1.86934
1.96	2.50729	2.25819	1.96	1.06838	1.89292
1.98	2.48001	2.09485	1.98	1.09399	1.80784
2	2.49911	1.83697	2	1.17423	1.77008
2.02	2.66177	2.11192	2.02	1.1354	1.72641
2.04	2.50413	1.86582	2.04	1.12491	1.79832
2.06	2.66337	1.90512	2.06	1.00771	1.83211
2.08	2.89636	1.95979	2.08	0.999537	1.68309
2.1	2.727	1.80693	2.1	1.00598	1.61446
2.12	2.60215	1.90977	2.12	1.03801	1.80847
2.14	2.71747	2.16108	2.14	1.00507	1.61993
2.16	2.72268	1.90893	2.16	1.06946	1.69236
2.18	2.79045	1.94895	2.18	1.0421	1.68934
2.2	2.67898	1.72754	2.2	0.999758	1.68488
2.22	2.64553	2.08239	2.22	1.03832	1.68341
2.24	2.57733	1.96441	2.24	0.988226	1.77088
2.26	2.46007	1.96007	2.26	0.984377	1.68294
2.28	2.2153	2.12598	2.28	1.04872	1.62482
2.3	2.19561	2.03268	2.3	1.01854	1.71719
2.32	2.43622	1.983	2.32	1.04868	1.59677
2.34	2.35713	2.0397	2.34	1.12689	1.62614
2.36	2.38219	1.83108	2.36	1.05561	1.7399
2.38	2.4151	1.83036	2.38	1.04081	1.72411
2.4	2.47558	2.131	2.4	1.07221	1.85915
2.42	2.49345	2.17195	2.42	1.12089	1.63364
2.44	2.33577	2.25352	2.44	1.13685	1.51103
2.46	2.39987	2.16594	2.46	1.09001	1.75846
2.48	2.46956	1.85553	2.48	0.978909	1.7721
2.5	2.46895	2.20386	2.5	1.01856	1.49497
2.52	2.40212	1.88322	2.52	1.14975	1.59135
2.54	2.22268	2.06624	2.54	1.09866	1.62593
2.56	2.34555	2.35982	2.56	1.08395	1.66244
2.58	2.56575	2.18331	2.58	1.10681	1.72581
2.6	2.65352	1.97457	2.6	1.0737	1.77145
2.62	2.87416	1.92889	2.62	1.11036	1.76122
2.64	2.69147	2.3978	2.64	1.11142	1.84614
2.66	2.81724	2.15721	2.66	1.09459	1.73342
2.68	2.80111	1.99802	2.68	1.20203	1.66014
2.7	2.84907	2.09811	2.7	1.15571	1.63197
2.72	2.69158	2.034	2.72	1.15843	1.7466
2.74	2.73963	1.99003	2.74	1.18326	1.71588
2.76	2.78645	1.2006	2.76	1.19613	1.71946
2.78	2.76439	1.27048	2.78	1.11715	1.69691
2.8	2.697	1.54627	2.8	1.08992	1.69567
2.82	2.63251	1.99126	2.82	1.14084	1.63994
2.84	2.50188	2.20402	2.84	1.20764	1.74059
2.86	2.737	2.21703	2.86	1.20825	1.93541
2.88	2.89043	2.16566	2.88	1.13695	1.81737
2.9	2.82958	2.23824	2.9	1.24759	1.81127
2.92	3.01603	2.2916	2.92	1.23684	1.76684
2.94	3.02611	2.22714	2.94	1.12748	1.72834
2.96	3.16415	2.19753	2.96	1.15841	1.71157
2.98	3.1763	2.24925	2.98	1.14116	1.72105
3	3.21047	2.23533	3	1.16025	1.75501
3.02	3.01055	2.40856	3.02	1.13904	1.86306
3.04	3.18027	1.89988	3.04	1.20294	1.92752
3.06	2.94387	2.08124	3.06	1.15579	1.73662
3.08	2.95072	2.30514	3.08	1.09461	1.63846
3.1	2.87744	1.79111	3.1	1.16956	1.71705
3.12	2.78908	1.92177	3.12	1.11773	1.44967
3.14	2.63461	2.33402	3.14	1.14067	1.70687
3.16	2.51693	2.13841	3.16	1.15865	1.74255
3.18	2.35038	2.36926	3.18	1.14098	1.76546
3.2	2.32423	1.99147	3.2	1.10683	1.67964
3.22	2.41204	2.04753	3.22	1.08033	1.65709
3.24	2.34486	2.34378	3.24	1.09308	1.80555
3.26	2.32929	1.99539	3.26	1.11604	1.75398
3.28	1.9188	1.86876	3.28	1.06032	1.64101
3.3	1.95903	2.08042	3.3	1.147	1.73927
3.32	2.12972	1.6787	3.32	1.10754	1.72643
3.34	2.11231	1.62248	3.34	1.09761	1.7927
3.36	1.95272	1.66317	3.36	1.12003	1.69755
3.38	1.98884	1.9411	3.38	1.13087	1.71471
3.4	2.11671	1.96271	3.4	1.2169	1.75295
3.42	2.20648	1.96013	3.42	1.16447	1.76154
3.44	2.23899	2.06127	3.44	1.24454	1.71392
3.46	2.26771	1.81622	3.46	1.07807	1.68825
3.48	2.62141	1.85946	3.48	1.31919	1.79606
3.5	2.72088	1.78543	3.5	1.20813	1.66237
3.52	2.60535	2.0132	3.52	1.31656	1.61738
3.54	2.61424	1.97677	3.54	1.39945	1.70604
3.56	3.01569	2.09303	3.56	1.32356	1.75344
3.58	2.89198	1.91041	3.58	1.37975	1.76169
3.6	3.05781	2.29074	3.6	1.40684	1.81696
3.62	2.90859	2.20944	3.62	1.2773	1.69942
3.64	3.19641	2.11292	3.64	1.30415	1.79335
3.66	2.95203	1.92347	3.66	1.30403	1.56069
3.68	2.96834	1.53069	3.68	1.28651	1.65127
3.7	3.04689	1.8264	3.7	1.33141	1.81125
3.72	3.21299	1.81948	3.72	1.35023	1.55622
3.74	2.873	1.8566	3.74	1.36263	1.75447
3.76	2.57289	1.84044	3.76	1.42347	1.63745
3.78	2.63212	1.7986	3.78	1.40921	1.86639
3.8	2.78299	1.98677	3.8	1.39571	1.6586
3.82	2.70556	1.8935	3.82	1.47226	1.73535
3.84	2.61917	1.81097	3.84	1.41287	1.75433
3.86	2.52817	1.85506	3.86	1.52668	1.91332
3.88	2.60253	1.8526	3.88	1.38169	2.06648
3.9	2.27181	1.55951	3.9	1.35409	1.56037
3.92	2.39597	1.77824	3.92	1.3542	1.88263
3.94	2.59148	2.13118	3.94	1.38439	1.73575
3.96	2.52327	2.08207	3.96	1.28813	1.85608
3.98	2.55153	2.04253	3.98	1.44432	1.77185
4	2.48481	2.17575	4	1.44977	1.74333
4.02	2.37272	2.48956	4.02	1.43072	1.55204
4.04	2.56777	2.19288	4.04	1.40365	1.86727
4.06	2.50196	2.07717	4.06	1.36364	2.06966
4.08	2.61554	2.14845	4.08	1.34755	2.25663
4.1	2.91469	1.9117	4.1	1.44894	2.28844
4.12	3.01199	2.72196	4.12	1.44296	1.94729
4.14	2.77953	2.8055	4.14	1.33985	2.40233
4.16	2.80623	2.95159	4.16	1.45152	2.51359
4.18	2.67978	2.7278	4.18	1.52816	2.45493
4.2	2.41615	2.8346	4.2	1.33848	2.20112
4.22	2.62437	2.84092	4.22	1.35999	1.98428
4.24	2.45451	2.81361	4.24	1.39094	2.31866
4.26	2.3495	2.70765	4.26	1.47745	2.26183
4.28	2.4063	2.89528	4.28	1.4671	2.35585
4.3	2.57322	2.78654	4.3	1.5348	2.12709
4.32	2.6669	2.70975	4.32	1.3824	2.2905
4.34	2.48939	2.54961	4.34	1.41539	2.4809
4.36	2.66554	2.58004	4.36	1.41547	2.11043
4.38	2.38643	2.51844	4.38	1.32925	1.81329
4.4	2.18876	2.84054	4.4	1.36153	1.90301
4.42	2.54544	2.85753	4.42	1.39166	1.93375
4.44	2.63798	2.7424	4.44	1.37807	1.93134
4.46	2.71976	2.7433	4.46	1.33394	1.89292
4.48	2.80666	2.82695	4.48	1.36153	1.50891
4.5	2.58103	2.77487	4.5	1.47628	1.73614
4.52	2.5217	2.84685	4.52	1.30525	1.87322
4.54	2.29617	2.83494	4.54	1.32897	1.72638
4.56	2.57347	2.81901	4.56	1.24629	1.75775
4.58	2.37361	2.62155	4.58	1.25518	1.8317
4.6	2.18858	2.79143	4.6	1.49341	1.67349
4.62	2.15168	2.91809	4.62	1.42234	1.85101
4.64	2.33473	2.84339	4.64	1.33899	1.68711
4.66	2.59684	2.8244	4.66	1.3051	2.06301
4.68	2.86841	2.81283	4.68	1.41773	1.92251
4.7	2.69529	2.6591	4.7	1.37204	1.86794
4.72	2.78709	2.80362	4.72	1.38926	2.12253
4.74	2.61084	2.83282	4.74	1.47334	1.89488
4.76	2.85886	2.88195	4.76	1.34275	1.87694
4.78	2.84702	2.79455	4.78	1.44144	2.30532
4.8	2.79813	2.70198	4.8	1.39259	2.14446
4.82	2.8212	2.95836	4.82	1.36724	2.14458
4.84	3.02466	2.90719	4.84	1.46072	1.98714
4.86	3.08557	2.83393	4.86	1.43727	1.91433
4.88	2.77839	2.80458	4.88	1.40521	2.34138
4.9	3.03356	2.818	4.9	1.45696	2.07939
4.92	2.84745	2.74935	4.92	1.49396	1.58744
4.94	2.85215	2.83009	4.94	1.4869	1.90074
4.96	2.61891	2.87908	4.96	1.4671	1.96525
4.98	2.77364	2.78068	4.98	1.52713	1.95621
5	2.86888	2.70513	5	1.65433	2.05688
5.02	2.84631	2.61178	5.02	1.66912	2.0179
5.04	2.64598	2.76343	5.04	1.66379	2.12988
5.06	2.72342	2.79215	5.06	1.68127	2.18383
5.08	2.74093	2.6268	5.08	1.67081	2.5993
5.1	2.8493	2.60549	5.1	1.65093	2.11419
5.12	2.99802	2.72742	5.12	1.54251	2.13322
5.14	2.9419	2.86461	5.14	1.42197	2.18488
5.16	3.0119	2.65188	5.16	1.46385	2.28862
5.18	2.77256	2.68981	5.18	1.53181	2.38018
5.2	2.75756	2.94799	5.2	1.49836	2.11809
5.22	2.77574	2.89062	5.22	1.61932	2.31246
5.24	2.75656	2.77977	5.24	1.45197	2.12222
5.26	2.76689	2.75688	5.26	1.49151	2.36385
5.28	2.66441	2.8769	5.28	1.59422	2.08969
5.3	2.74231	2.90992	5.3	1.64195	2.37405
5.32	2.87626	2.86791	5.32	1.59406	2.25604
5.34	2.81034	2.86227	5.34	1.74245	1.88101
5.36	2.81471	2.68532	5.36	1.54853	1.93511
5.38	2.92219	2.85312	5.38	1.63066	1.83417
5.4	2.76438	2.66245	5.4	1.50785	1.94304
5.42	2.66953	2.6853	5.42	1.48465	2.2939
5.44	2.50145	2.72046	5.44	1.46192	2.21085
5.46	2.43135	2.78618	5.46	1.45172	2.23399
5.48	2.44185	2.91977	5.48	1.46322	2.28534
5.5	2.40411	2.76456	5.5	1.5351	2.18432
5.52	2.69053	2.90386	5.52	1.50395	1.97154
5.54	2.45695	2.83443	5.54	1.40872	2.04091
5.56	2.30523	3.10441	5.56	1.47269	2.27545
5.58	2.24435	3.08122	5.58	1.56119	1.77277
5.6	2.2268	3.06137	5.6	1.36413	1.86079
5.62	2.16184	3.0251	5.62	1.41964	2.26453
5.64	2.282	2.7351	5.64	1.40824	1.67917
5.66	2.18144	2.83511	5.66	1.38149	1.69435
5.68	2.16526	2.7827	5.68	1.4144	2.4158
5.7	2.58979	2.81067	5.7	1.47619	1.89783
5.72	2.57441	2.88395	5.72	1.53625	2.26025
5.74	2.56823	2.92691	5.74	1.51755	2.43268
5.76	2.50416	2.87227	5.76	1.50185	2.15603
5.78	2.70219	2.93865	5.78	1.42072	2.31578
5.8	2.58015	2.93625	5.8	1.52567	2.0021
5.82	2.63379	2.84809	5.82	1.5299	2.41525
5.84	2.63499	2.79393	5.84	1.43137	2.30618
5.86	2.44348	2.81065	5.86	1.42251	2.81235
5.88	2.38035	2.6595	5.88	1.51012	2.74232
5.9	2.6112	2.76968	5.9	1.51874	2.5639
5.92	2.63671	2.87087	5.92	1.52189	2.55711
5.94	2.35849	2.71461	5.94	1.55203	2.50947
5.96	2.22658	2.85158	5.96	1.56511	2.09587
5.98	2.43223	2.8032	5.98	1.45853	2.09325
6	2.4485	3.01538	6	1.52838	2.10975
6.02	2.48178	3.10756	6.02	1.52694	1.45667
6.04	2.42887	2.94778	6.04	1.52741	1.75726
6.06	2.65347	2.93779	6.06	1.5341	1.59698
6.08	2.51417	3.09975	6.08	1.42004	1.72014
6.1	2.52945	3.08186	6.1	1.45171	1.29633
6.12	2.53465	2.89646	6.12	1.5561	1.50291
6.14	2.36495	2.77822	6.14	1.54239	1.33986
6.16	2.46662	2.81701	6.16	1.49524	1.5069
6.18	2.23713	2.76909	6.18	1.58631	1.50866
6.2	2.15351	2.7303	6.2	1.5856	1.44273
6.22	2.01292	2.69987	6.22	1.52975	1.62983
6.24	2.1204	2.66557	6.24	1.4129	1.61958
6.26	2.17883	2.80672	6.26	1.53106	1.48771
6.28	2.4025	2.80506	6.28	1.6291	1.73029
6.3	2.42207	2.60371	6.3	1.52264	1.49302
6.32	2.24994	2.77943	6.32	1.57594	1.55784
6.34	2.05	2.70675	6.34	1.5786	1.59877
6.36	2.11181	2.88141	6.36	1.59264	1.56992
6.38	2.26424	2.80052	6.38	1.61906	1.57781
6.4	2.14895	2.77411	6.4	1.6652	1.71404
6.42	2.29908	2.80637	6.42	1.5053	1.83871
6.44	2.10355	2.74606	6.44	1.43586	1.96239
6.46	2.04488	2.71679	6.46	1.57134	1.8344
6.48	2.22692	2.72685	6.48	1.47599	1.83026
6.5	2.14654	2.6666	6.5	1.50465	2.67261
6.52	2.17716	2.92896	6.52	1.57862	2.86678
6.54	2.1514	2.95867	6.54	1.65881	2.67595
6.56	2.08202	2.91856	6.56	1.71457	2.43257
6.58	1.98526	2.97614	6.58	1.4627	2.40618
6.6	1.96396	3.02055	6.6	1.41697	2.55517
6.62	1.80978	3.05527	6.62	1.54558	1.5272
6.64	1.73262	2.99532	6.64	1.49122	1.71942
6.66	1.61017	2.94073	6.66	1.47652	2.20479
6.68	1.72283	2.97509	6.68	1.49742	2.01596
6.7	1.62795	2.94344	6.7	1.45182	1.49719
6.72	1.64051	2.96389	6.72	1.5251	1.40459
6.74	1.65386	3.03851	6.74	1.42225	1.76384
6.76	1.64149	2.92564	6.76	1.53114	1.70676
6.78	1.6815	3.04094	6.78	1.51908	1.85322
6.8	1.80452	3.00202	6.8	1.45228	1.7642
6.82	1.8501	3.06289	6.82	1.43622	1.18698
6.84	1.7888	3.10813	6.84	1.44797	1.26396
6.86	1.88862	3.06273	6.86	1.45227	1.48812
6.88	1.99561	2.75936	6.88	1.45373	1.8936
6.9	2.11347	2.81732	6.9	1.45306	1.47472
6.92	2.24837	2.7612	6.92	1.46284	1.60439
6.94	2.17722	2.68933	6.94	1.55193	1.75257
6.96	2.07878	2.73719	6.96	1.43622	1.60809
6.98	2.23682	2.84204	6.98	1.55832	1.6881
7	2.23953	2.66321	7	1.55033	1.32454
7.02	2.06917	2.66736	7.02	1.48655	1.61163
7.04	2.18725	2.58743	7.04	1.60063	1.98728
7.06	2.10351	2.85363	7.06	1.45884	1.89358
7.08	2.16332	2.75207	7.08	1.50353	2.07699
7.1	2.15513	2.64697	7.1	1.43341	1.79143
7.12	2.2879	2.6496	7.12	1.40402	1.6641
7.14	2.10441	2.53119	7.14	1.47589	1.55586
7.16	2.20053	2.75286	7.16	1.48313	1.59288
7.18	2.20093	2.60525	7.18	1.50445	1.7425
7.2	2.31429	2.65856	7.2	1.55809	1.73231
7.22	2.37302	2.59554	7.22	1.46788	1.65538
7.24	2.55215	2.59088	7.24	1.50896	1.6724
7.26	2.62778	2.74683	7.26	1.47007	1.57121
7.28	2.49382	2.7205	7.28	1.34001	1.69581
7.3	2.30622	2.80331	7.3	1.37931	1.88777
7.32	2.29279	2.75967	7.32	1.44527	2.193
7.34	2.30086	2.81809	7.34	1.39515	1.61846
7.36	2.32618	2.86074	7.36	1.38728	1.31996
7.38	2.27037	2.85578	7.38	1.33018	1.06299
7.4	2.37575	2.80921	7.4	1.43602	1.06104
7.42	2.42545	2.81602	7.42	1.43353	1.37706
7.44	2.44875	2.84089	7.44	1.46727	1.40341
7.46	2.5005	2.77176	7.46	1.38768	1.25299
7.48	2.49278	2.79427	7.48	1.35502	2.53726
7.5	2.44374	2.79433	7.5	1.28997	3.12461
7.52	2.47234	2.83313	7.52	1.28357	2.98215
7.54	2.63421	2.82435	7.54	1.33244	3.60686
7.56	2.63245	2.7956	7.56	1.21909	2.83148
7.58	2.72477	2.94295	7.58	1.24398	2.33515
7.6	2.52325	3.03869	7.6	1.36316	2.70621
7.62	2.65247	2.96998	7.62	1.31879	2.36428
7.64	2.71835	3.11377	7.64	1.3461	3.08503
7.66	2.67598	2.90813	7.66	1.32427	2.51251
7.68	2.52526	3.02282	7.68	1.24343	2.71814
7.7	2.54483	3.05539	7.7	1.27954	2.77871
7.72	2.51945	2.91278	7.72	1.28408	2.83652
7.74	2.71315	2.96518	7.74	1.35643	2.79734
7.76	2.90559	2.98034	7.76	1.48642	2.86106
7.78	2.4354	2.89616	7.78	1.42211	2.47212
7.8	2.35308	3.07885	7.8	1.34843	3.26769
7.82	2.38067	2.95548	7.82	1.40245	3.12118
7.84	2.34806	3.05576	7.84	1.51059	3.01603
7.86	2.37896	3.01513	7.86	1.38772	2.87322
7.88	2.37718	2.97755	7.88	1.47846	3.06983
7.9	2.28964	2.91376	7.9	1.44797	3.17902
7.92	2.13675	3.05454	7.92	1.49085	2.93634
7.94	2.34594	3.02083	7.94	1.53114	3.14189
7.96	2.36063	3.00624	7.96	1.51299	2.96812
7.98	2.34146	3.04252	7.98	1.63414	2.97376
8	2.20033	2.96935	8	1.62909	3.08309
8.02	2.34296	2.93327	8.02	1.44615	3.24555
8.04	2.32454	2.92961	8.04	1.65015	3.42154
8.06	2.40428	2.95833	8.06	1.54293	2.96419
8.08	2.26701	3.04145	8.08	1.58784	3.01637
8.1	2.29196	2.96017	8.1	1.4587	3.30746
8.12	2.54064	2.93313	8.12	1.54876	3.03679
8.14	2.37161	2.87796	8.14	1.4425	3.35809
8.16	2.31989	2.85272	8.16	1.46196	3.34493
8.18	2.32345	2.86494	8.18	1.50281	3.03389
8.2	2.28854	2.88261	8.2	1.58662	3.13444
8.22	2.32165	2.82971	8.22	1.60077	2.86001
8.24	2.39938	2.86836	8.24	1.53005	3.4309
8.26	2.4837	2.87721	8.26	1.5616	3.19105
8.28	2.42281	2.87635	8.28	1.41825	3.39032
8.3	2.61958	2.84369	8.3	1.46009	3.04208
8.32	2.47738	2.82269	8.32	1.41954	3.20408
8.34	2.66951	2.84492	8.34	1.42484	3.36827
8.36	2.79281	2.8254	8.36	1.39639	3.10558
8.38	2.82047	2.81462	8.38	1.49902	3.51413
8.4	2.80982	2.81585	8.4	1.47346	3.30525
8.42	2.73452	2.8352	8.42	1.3849	3.26283
8.44	2.7507	2.84236	8.44	1.42638	3.33332
8.46	2.89478	2.88572	8.46	1.45064	2.94749
8.48	2.89706	3.03711	8.48	1.53429	2.70159
8.5	2.78231	3.04177	8.5	1.46575	2.95324
8.52	2.86375	3.01138	8.52	1.4511	3.11713
8.54	2.87802	3.11816	8.54	1.4674	2.76209
8.56	2.72013	2.90805	8.56	1.42633	3.07565
8.58	2.61803	2.96914	8.58	1.40145	2.92827
8.6	2.72732	3.13937	8.6	1.54544	2.58258
8.62	2.67716	2.9398	8.62	1.57783	2.76095
8.64	2.73249	3.04428	8.64	1.45775	2.71918
8.66	2.67139	2.85686	8.66	1.50908	2.63106
8.68	2.51495	2.90028	8.68	1.45391	2.91891
8.7	2.60265	2.87162	8.7	1.43198	2.94535
8.72	2.51021	2.94248	8.72	1.29087	2.99219
8.74	2.60129	3.05813	8.74	1.53784	2.7706
8.76	2.65064	2.81952	8.76	1.38567	2.56271
8.78	2.59431	2.963	8.78	1.31314	2.76595
8.8	2.73758	3.02496	8.8	1.38699	2.96404
8.82	2.60144	2.77941	8.82	1.40847	3.09601
8.84	2.63704	2.91097	8.84	1.36975	2.9189
8.86	2.62546	2.90368	8.86	1.33579	2.70148
8.88	2.88973	2.92975	8.88	1.3386	2.98999
8.9	2.81712	3.00839	8.9	1.26992	2.58744
8.92	2.92088	2.99681	8.92	1.39374	2.60133
8.94	2.9366	2.95867	8.94	1.36041	2.93668
8.96	2.89544	2.90564	8.96	1.39048	3.06368
8.98	3.01856	2.90703	8.98	1.45145	3.0092
9	2.95697	2.83644	9	1.27676	3.08327
9.02	2.70625	2.89855	9.02	1.37397	2.92543
9.04	2.70793	2.93071	9.04	1.41818	2.57575
9.06	2.56896	3.05918	9.06	1.41786	2.78513
9.08	2.43364	3.10387	9.08	1.51464	3.06551
9.1	2.35772	3.05264	9.1	1.61679	2.88021
9.12	2.36228	3.21445	9.12	1.57437	2.61854
9.14	2.41618	3.12579	9.14	1.51166	2.92259
9.16	2.49597	2.94101	9.16	1.50946	3.07113
9.18	2.48156	3.09112	9.18	1.40031	2.91906
9.2	2.63096	3.01104	9.2	1.43732	2.87798
9.22	2.62923	2.94919	9.22	1.57545	2.78248
9.24	2.7901	3.03097	9.24	1.45508	2.86521
9.26	2.78616	2.97586	9.26	1.48066	2.84926
9.28	2.95685	3.06524	9.28	1.52283	2.67079
9.3	3.03549	3.0128	9.3	1.56163	3.21827
9.32	3.16578	2.93868	9.32	1.4448	2.96156
9.34	2.99446	2.91898	9.34	1.53979	3.24093
9.36	3.15075	3.10477	9.36	1.42988	3.0579
9.38	3.05696	2.83712	9.38	1.5474	3.07518
9.4	3.05294	3.084	9.4	1.57702	2.87752
9.42	2.96088	2.83522	9.42	1.58869	2.83081
9.44	2.69844	2.91466	9.44	1.63367	3.18597
9.46	2.64238	2.82969	9.46	1.58673	3.04814
9.48	2.73334	2.8507	9.48	1.42052	2.88327
9.5	2.5975	2.86356	9.5	1.46074	3.13563
9.52	2.84478	2.81291	9.52	1.40767	3.02758
9.54	2.77613	2.88173	9.54	1.47446	3.20813
9.56	2.88451	2.88414	9.56	1.42047	3.15305
9.58	2.77171	2.83734	9.58	1.4891	2.95303
9.6	2.6235	2.88279	9.6	1.51137	3.53612
9.62	2.58849	2.87017	9.62	1.54119	3.50346
9.64	2.49316	2.98153	9.64	1.48739	3.27367
9.66	2.51946	2.92095	9.66	1.43988	3.18086
9.68	2.48703	2.98323	9.68	1.47341	3.10597
9.7	2.49918	2.96761	9.7	1.54695	3.15251
9.72	2.65952	2.85712	9.72	1.44773	3.16341
9.74	2.73087	2.89353	9.74	1.42882	3.51851
9.76	2.74709	2.84871	9.76	1.46119	3.13763
9.78	2.82893	2.85583	9.78	1.45842	2.74717
9.8	2.87314	2.80957	9.8	1.42153	2.86316
9.82	3.03193	2.97483	9.82	1.33412	2.92836
9.84	2.97328	2.83278	9.84	1.49267	2.95976
9.86	3.01895	2.84588	9.86	1.46393	2.80513
9.88	3.18513	2.94147	9.88	1.47525	3.13411
9.9	3.23452	2.84497	9.9	1.5345	2.98743
9.92	3.03417	2.87987	9.92	1.56479	3.0389
9.94	3.04506	2.99575	9.94	1.49474	3.02206
9.96	3.06769	3.01564	9.96	1.51073	3.13545
9.98	3.07451	3.05233	9.98	1.60196	2.91983
10	3.04199	2.98182	10	1.5414	2.9582
10.02	2.9353	2.82502	10.02	1.55868	3.14182
10.04	3.01908	2.878	10.04	1.60195	3.42932
10.06	2.69079	2.81145	10.06	1.57848	3.30195
10.08	2.66119	2.86076	10.08	1.59294	3.49646
10.1	2.73327	2.83691	10.1	1.49727	3.38832
10.12	2.74154	2.77111	10.12	1.5802	3.05213
10.14	2.96123	2.81633	10.14	1.61126	3.29049
10.16	2.95636	2.95756	10.16	1.59773	3.09776
10.18	2.85212	2.84374	10.18	1.49585	2.98138
10.2	2.82498	2.79819	10.2	1.49188	3.16377
10.22	3.06205	2.87969	10.22	1.61523	3.33577
10.24	3.19578	2.97804	10.24	1.5523	3.36434
10.26	3.0092	2.76622	10.26	1.55496	3.31845
10.28	2.83551	2.88646	10.28	1.6856	3.42895
10.3	2.934	2.96931	10.3	1.68057	3.14102
10.32	2.74738	2.86422	10.32	1.76211	3.22112
10.34	2.7842	2.8186	10.34	1.7924	3.1644
10.36	2.59203	2.82886	10.36	1.69468	3.29978
10.38	2.54444	2.8282	10.38	1.60358	3.00559
10.4	2.43785	2.78792	10.4	1.63144	3.22019
10.42	2.58587	2.83976	10.42	1.63236	3.16814
10.44	2.63323	2.84195	10.44	1.68148	2.98884
10.46	2.50135	2.81148	10.46	1.76869	2.80569
10.48	2.54114	2.86644	10.48	1.77656	2.96791
10.5	2.45348	2.90557	10.5	1.8245	2.94733
10.52	2.54842	2.99469	10.52	1.90351	3.1773
10.54	2.60751	2.91631	10.54	1.80235	3.12997
10.56	2.47227	2.73915	10.56	1.778	2.92029
10.58	2.56429	2.88769	10.58	1.80235	2.93117
10.6	2.64722	2.92611	10.6	1.70585	2.56753
10.62	2.56951	2.9714	10.62	1.71735	2.83541
10.64	2.4339	2.95069	10.64	1.72782	2.86817
10.66	2.4195	2.96257	10.66	1.75719	2.99784
10.68	2.38951	2.96705	10.68	1.81515	2.79841
10.7	2.35126	2.85708	10.7	1.83511	3.35156
10.72	2.34142	2.83436	10.72	1.84097	3.19596
10.74	2.27593	2.97559	10.74	1.81689	2.73539
10.76	2.29665	2.8999	10.76	1.85044	3.17716
10.78	2.34713	2.88191	10.78	1.88354	3.0935
10.8	2.43442	2.90617	10.8	1.85298	3.05812
10.82	2.43625	2.8551	10.82	1.83247	2.76306
10.84	2.33566	3.08568	10.84	1.73219	3.1895
10.86	2.41462	2.96668	10.86	1.69451	3.29275
10.88	2.44894	2.97487	10.88	1.77709	3.04063
10.9	2.5179	2.87671	10.9	1.80649	3.19487
10.92	2.4428	2.98955	10.92	1.83934	2.72454
10.94	2.34724	2.9563	10.94	1.72121	2.73998
10.96	2.44027	2.92333	10.96	1.78878	3.27695
10.98	2.2864	2.93371	10.98	1.88286	3.0067
11	2.3768	2.93343	11	1.92362	2.84641
11.02	2.3761	2.94407	11.02	1.94759	2.75819
11.04	2.32972	2.60937	11.04	1.93865	2.50033
11.06	2.28933	2.89392	11.06	2.01944	2.80675
11.08	2.3132	2.90173	11.08	1.9466	2.78646
11.1	2.38068	2.94477	11.1	2.05941	2.765
11.12	2.49472	3.02235	11.12	2.00046	2.96467
11.14	2.48499	3.00083	11.14	2.05623	2.6296
11.16	2.33216	2.96828	11.16	2.07114	2.41577
11.18	2.39596	2.93971	11.18	2.03428	2.77515
11.2	2.43145	3.06019	11.2	2.06655	2.81248
11.22	2.48217	3.02748	11.22	1.95925	2.90603
11.24	2.25458	3.01685	11.24	1.98348	2.51684
11.26	2.43453	3.07355	11.26	2.01195	2.44771
11.28	2.50371	2.94419	11.28	2.06192	2.65077
11.3	2.65885	2.94526	11.3	1.99901	2.69738
11.32	2.6684	3.01538	11.32	2.06611	2.88569
11.34	2.68834	3.03044	11.34	1.90515	2.47754
11.36	2.78405	2.80582	11.36	2.14127	2.8576
11.38	2.65721	2.90577	11.38	2.00738	2.61999
11.4	2.48732	3.03169	11.4	2.00852	2.81183
11.42	2.44618	2.8851	11.42	2.05833	2.87857
11.44	2.48135	3.00281	11.44	2.10649	2.93385
11.46	2.59636	2.88273	11.46	2.28339	2.814
11.48	2.57031	2.88917	11.48	2.11084	2.793
11.5	2.43259	2.8491	11.5	2.06749	3.15852
11.52	2.29821	2.81641	11.52	2.04891	2.42405
11.54	2.12759	2.93849	11.54	2.12913	2.97343
11.56	2.16999	2.89511	11.56	2.14297	3.05362
11.58	2.22755	2.9329	11.58	2.09214	2.92569
11.6	2.31276	2.80378	11.6	2.11607	2.50855
11.62	2.24023	2.61016	11.62	2.13466	2.72948
11.64	2.19272	2.78555	11.64	2.17712	2.54852
11.66	2.16076	2.9266	11.66	2.29514	3.35468
11.68	2.19064	2.8787	11.68	2.25821	2.69813
11.7	2.32791	2.74068	11.7	2.30369	2.95368
11.72	2.33667	2.80899	11.72	2.18962	2.79875
11.74	2.45552	2.88339	11.74	2.20205	2.94432
11.76	2.37131	2.91075	11.76	2.20294	2.65885
11.78	2.48423	2.91625	11.78	2.20336	3.06082
11.8	2.48021	2.8934	11.8	2.05006	2.5657
11.82	2.53414	2.92558	11.82	2.06246	2.57104
11.84	2.60194	2.82318	11.84	2.0217	2.95654
11.86	2.58438	2.83398	11.86	2.12298	3.3151
11.88	2.60057	2.91584	11.88	2.08533	3.47928
11.9	2.66547	2.84915	11.9	2.13607	2.64054
11.92	2.57235	2.9034	11.92	1.98213	3.34219
11.94	2.54896	2.9108	11.94	2.02442	3.08035
11.96	2.46056	2.7003	11.96	2.17074	3.71368
11.98	2.39689	2.93202	11.98	2.15255	3.6461
12	2.56152	2.96572	12	2.23706	2.72942
12.02	2.51249	2.88954	12.02	2.12589	3.01006
12.04	2.69364	2.90371	12.04	2.11028	2.48276
12.06	2.68275	3.0733	12.06	2.14564	2.89991
12.08	2.71349	3.05578	12.08	2.12906	3.73047
12.1	2.79739	3.07782	12.1	2.15612	3.04774
12.12	2.87333	2.92976	12.12	2.19808	3.02859
12.14	2.71369	2.96101	12.14	2.06275	2.88147
12.16	2.69747	2.94156	12.16	2.18373	2.70277
12.18	2.57408	3.08938	12.18	2.1419	2.49381
12.2	2.58139	2.98922	12.2	2.12452	2.61816
12.22	2.53655	2.90555	12.22	2.08574	2.62231
12.24	2.39358	2.81056	12.24	1.99799	3.09269
12.26	2.37306	2.81903	12.26	2.05188	2.5808
12.28	2.40213	2.83383	12.28	2.05267	3.02666
12.3	2.28707	2.84677	12.3	2.09625	3.15702
12.32	2.28525	2.85775	12.32	2.16205	2.67033
12.34	2.19946	2.88186	12.34	2.21236	2.68598
12.36	2.12306	2.93735	12.36	2.31331	2.5924
12.38	2.25084	2.85486	12.38	2.09169	3.13807
12.4	2.37049	2.85819	12.4	2.07225	3.17533
12.42	2.45974	2.87088	12.42	2.02226	2.54061
12.44	2.50827	2.93597	12.44	2.02258	2.63596
12.46	2.47545	2.8293	12.46	2.11678	2.58444
12.48	2.4087	2.77332	12.48	2.07479	2.62329
12.5	2.58681	2.81958	12.5	2.29603	3.23698
12.52	2.53511	2.70494	12.52	2.3086	2.67098
12.54	2.57237	2.86126	12.54	2.30137	2.92237
12.56	2.55803	2.99983	12.56	2.29733	2.83872
12.58	2.47911	2.9989	12.58	2.29255	2.71472
12.6	2.57959	3.00269	12.6	2.16563	2.87861
12.62	2.58207	3.17778	12.62	2.22998	3.77904
12.64	2.47816	2.96402	12.64	2.13063	3.28648
12.66	2.39459	3.10779	12.66	2.44423	2.67704
12.68	2.40474	3.25717	12.68	2.46579	3.15274
12.7	2.28727	3.18249	12.7	2.25642	3.70188
12.72	2.30208	2.96369	12.72	2.42819	3.6124
12.74	2.39223	2.97627	12.74	2.38194	2.7017
12.76	2.49639	3.05455	12.76	2.46026	2.3119
12.78	2.49796	2.923	12.78	2.38937	2.46467
12.8	2.71028	2.90446	12.8	2.34586	3.03596
12.82	2.79758	2.92272	12.82	2.33763	2.90627
12.84	2.759	3.04371	12.84	2.35649	3.11685
12.86	2.62666	3.02314	12.86	2.38547	3.19492
12.88	2.5859	3.02988	12.88	2.17117	2.66839
12.9	2.48537	3.39298	12.9	2.39187	2.77596
12.92	2.409	3.17739	12.92	2.3127	2.87975
12.94	2.62727	3.21234	12.94	2.2423	2.8613
12.96	2.58052	3.09553	12.96	2.36259	3.00446
12.98	2.56961	3.14007	12.98	2.24759	2.83468
13	2.42877	2.91753	13	2.25132	2.70054
13.02	2.3946	2.68521	13.02	2.30242	3.01523
13.04	2.35159	2.65013	13.04	2.34707	2.57357
13.06	2.39079	2.776	13.06	2.32726	2.45609
13.08	2.22217	2.78674	13.08	2.33312	2.42259
13.1	2.43307	2.95065	13.1	2.28111	2.68959
13.12	2.43428	2.89692	13.12	2.26156	2.66003
13.14	2.4668	2.84207	13.14	2.19349	2.58953
13.16	2.31591	2.93074	13.16	2.39412	3.09674
13.18	2.31088	2.87961	13.18	2.4223	3.13512
13.2	2.32061	2.83752	13.2	2.42928	3.19056
13.22	2.45366	2.75932	13.22	2.52112	2.96132
13.24	2.4812	2.78082	13.24	2.63884	3.47422
13.26	2.39415	2.85688	13.26	2.48341	2.93064
13.28	2.33562	3.08746	13.28	2.49869	3.03741
13.3	2.44469	2.91364	13.3	2.52836	3.44798
13.32	2.62783	2.91795	13.32	2.47455	3.50448
13.34	2.70899	2.78763	13.34	2.48509	3.52962
13.36	2.78005	2.77833	13.36	2.31469	3.46457
13.38	2.87447	2.90797	13.38	2.28322	3.11007
13.4	2.78399	2.94328	13.4	2.15318	3.51682
13.42	2.67863	2.91726	13.42	2.21741	3.48995
13.44	2.64861	2.85414	13.44	2.16499	3.6042
13.46	2.75218	2.85007	13.46	2.11554	3.57444
13.48	2.50765	2.8278	13.48	2.1604	3.22707
13.5	2.44906	2.89177	13.5	2.22206	3.39508
13.52	2.33081	2.8504	13.52	2.1789	2.93146
13.54	2.39781	2.86211	13.54	2.36045	3.12319
13.56	2.45157	2.82875	13.56	2.2274	3.32979
13.58	2.45119	2.86245	13.58	2.1367	3.05754
13.6	2.30235	2.85658	13.6	2.11265	3.29597
13.62	2.35293	2.79823	13.62	2.09734	3.13976
13.64	2.38842	2.84959	13.64	2.16726	2.91037
13.66	2.41518	2.90255	13.66	2.21018	2.73761
13.68	2.3967	2.90558	13.68	2.20174	3.41073
13.7	2.39115	2.80369	13.7	2.25327	3.00708
13.72	2.42274	2.90557	13.72	2.19996	3.10344
13.74	2.31716	2.87854	13.74	2.23372	2.42785
13.76	2.3626	2.81119	13.76	2.33698	2.70154
13.78	2.43714	2.82202	13.78	2.24348	3.3305
13.8	2.54365	2.82371	13.8	2.28646	3.21918
13.82	2.43959	2.79925	13.82	2.31275	2.83135
13.84	2.59823	2.79854	13.84	2.25806	3.72306
13.86	2.65836	2.7693	13.86	2.26602	3.40866
13.88	2.49724	2.96752	13.88	2.26132	3.18447
13.9	2.52714	2.92893	13.9	2.35938	3.79172
13.92	2.59397	2.92243	13.92	2.23859	3.63213
13.94	2.44118	2.85762	13.94	2.03886	3.01355
13.96	2.38243	2.84004	13.96	2.27069	2.56883
13.98	2.54728	2.962	13.98	2.21237	3.22851
14	2.60428	2.87715	14	2.20697	3.19637
14.02	2.41536	2.85001	14.02	2.18511	3.49517
14.04	2.2701	2.91942	14.04	2.27111	3.2217
14.06	2.43518	2.85946	14.06	2.33937	3.51679
14.08	2.44767	2.90718	14.08	2.40372	2.93689
14.1	2.32306	2.92032	14.1	2.26891	3.42848
14.12	2.36096	2.91811	14.12	2.34206	3.10431
14.14	2.27138	2.81999	14.14	2.32417	3.51334
14.16	2.25606	2.97167	14.16	2.40091	3.21326
14.18	2.35373	2.98637	14.18	2.47461	3.42738
14.2	2.28485	3.20415	14.2	2.47287	3.34582
14.22	2.36141	3.09581	14.22	2.39932	3.33509
14.24	2.45602	3.0532	14.24	2.20336	3.45215
14.26	2.47458	2.95796	14.26	2.23451	2.7216
14.28	2.68825	2.98779	14.28	2.36361	2.9336
14.3	2.55776	2.84752	14.3	2.34782	3.06191
14.32	2.6067	2.74399	14.32	2.33047	3.01185
14.34	2.58976	3.01678	14.34	2.3783	2.94683
14.36	2.49722	2.94691	14.36	2.4268	3.10037
14.38	2.52262	2.80396	14.38	2.298	2.80849
14.4	2.44496	2.85505	14.4	2.39941	3.05398
14.42	2.30795	2.92654	14.42	2.42482	3.03635
14.44	2.39131	2.9315	14.44	2.38482	3.20854
14.46	2.58744	2.82968	14.46	2.57246	3.1572
14.48	2.46633	2.89608	14.48	2.51214	3.06531
14.5	2.65686	2.8262	14.5	2.48014	3.14619
14.52	2.73544	2.87605	14.52	2.46097	3.07314
14.54	2.89733	2.84622	14.54	2.37496	3.09868
14.56	2.78432	2.82258	14.56	2.37406	3.18208
14.58	2.68077	2.83488	14.58	2.47998	3.27283
14.6	2.63345	2.90869	14.6	2.48404	3.32183
14.62	2.78215	2.86399	14.62	2.57653	3.1976
14.64	2.66702	2.86161	14.64	2.52115	3.11852
14.66	2.67409	2.79785	14.66	2.47698	3.20493
14.68	2.83398	2.88591	14.68	2.42573	3.0124
14.7	2.84723	2.7765	14.7	2.42662	3.13875
14.72	2.95732	2.72252	14.72	2.54937	3.23142
14.74	2.98012	2.79939	14.74	2.48162	3.23351
14.76	2.64838	2.86535	14.76	2.481	3.04979
14.78	2.64746	2.73372	14.78	2.54667	3.04591
14.8	2.37979	2.8868	14.8	2.45074	3.16034
14.82	2.56267	2.82911	14.82	2.53619	3.33954
14.84	2.45331	2.71243	14.84	2.37761	3.23198
14.86	2.51547	2.76501	14.86	2.37822	3.2996
14.88	2.38225	2.77852	14.88	2.35006	3.22714
14.9	2.37664	2.88507	14.9	2.51837	2.90053
14.92	2.44925	2.82009	14.92	2.50419	2.98561
14.94	2.56752	2.76666	14.94	2.61198	3.42819
14.96	2.56007	2.8616	14.96	2.5426	3.27501
14.98	2.65095	2.79539	14.98	2.4742	3.11778
15	2.92175	2.82759	15	2.46367	3.00921
15.02	2.85282	2.83535	15.02	2.47251	3.08919
15.04	2.82024	2.79789	15.04	2.40564	2.94086
15.06	2.94906	2.88244	15.06	2.37127	2.77941
15.08	3.17153	2.86168	15.08	2.40004	3.13497
15.1	3.20796	2.86997	15.1	2.40536	3.17022
15.12	3.2299	2.87557	15.12	2.40329	3.16667
15.14	3.27801	2.76546	15.14	2.49069	3.12536
15.16	3.19515	2.84488	15.16	2.43159	3.28592
15.18	3.19397	2.84462	15.18	2.42383	3.12873
15.2	3.21777	2.7866	15.2	2.47591	3.42741
15.22	3.56341	2.86513	15.22	2.44039	3.19336
15.24	3.51967	2.82427	15.24	2.48474	3.12757
15.26	3.48725	2.73996	15.26	2.43951	3.36109
15.28	3.43398	2.79902	15.28	2.4627	2.97908
15.3	3.31097	2.7697	15.3	2.47548	3.42142
15.32	3.25836	2.82309	15.32	2.47448	2.86648
15.34	3.26217	2.83978	15.34	2.5245	3.36023
15.36	3.25148	2.82241	15.36	2.55378	2.4994
15.38	3.22609	2.88803	15.38	2.54288	2.4785
15.4	3.39169	2.84292	15.4	2.57328	2.88835
15.42	3.45418	2.92695	15.42	2.52472	2.0993
15.44	3.29128	2.98736	15.44	2.57732	1.61299
15.46	3.3851	2.86378	15.46	2.64053	1.88332
15.48	3.25969	2.75365	15.48	2.61315	2.12732
15.5	3.3422	2.79503	15.5	2.55741	1.88502
15.52	3.37569	2.85077	15.52	2.53262	1.52623
15.54	3.35963	2.83071	15.54	2.47622	1.36113
15.56	3.31732	2.80963	15.56	2.49217	1.59541
15.58	3.33024	2.89322	15.58	2.45286	1.31763
15.6	3.3681	2.78268	15.6	2.46043	1.52622
15.62	3.27073	2.7832	15.62	2.38972	1.52332
15.64	3.48886	2.94841	15.64	2.43211	1.39245
15.66	3.38538	2.88088	15.66	2.3893	1.55588
15.68	3.38057	2.94717	15.68	2.52281	1.64537
15.7	3.27631	3.00702	15.7	2.46363	2.11827
15.72	3.14836	2.89329	15.72	2.47945	2.14716
15.74	3.03374	2.84531	15.74	2.50335	1.88671
15.76	3.08738	2.83845	15.76	2.3513	1.55097
15.78	3.15062	2.82427	15.78	2.44185	1.7804
15.8	3.08855	2.90775	15.8	2.35336	1.52992
15.82	3.23301	2.87739	15.82	2.43726	1.63656
15.84	3.17871	2.88083	15.84	2.61084	2.40813
15.86	3.16222	2.87053	15.86	2.44567	1.89494
15.88	3.16237	2.84502	15.88	2.39563	1.93475
15.9	3.41646	2.90897	15.9	2.37642	2.41905
15.92	3.35999	2.88092	15.92	2.42312	2.76036
15.94	3.21631	2.81231	15.94	2.35877	1.80379
15.96	3.08483	2.87475	15.96	2.44366	2.13581
15.98	2.90039	2.91143	15.98	2.33021	2.17376
16	2.99095	2.90939	16	2.32824	2.43556
16.02	3.01378	2.88035	16.02	2.20391	2.34532
16.04	3.1275	2.77709	16.04	2.40233	2.08208
16.06	3.10926	2.78517	16.06	2.33138	1.99316
16.08	3.16896	3.09101	16.08	2.44842	2.15404
16.1	3.35382	2.96876	16.1	2.40553	2.19271
16.12	3.29382	2.97085	16.12	2.47914	1.9154
16.14	3.3833	2.87375	16.14	2.36403	2.03007
16.16	3.43256	2.87503	16.16	2.48256	1.34816
16.18	3.45529	2.9782	16.18	2.36947	1.92578
16.2	3.40263	2.80557	16.2	2.38498	2.3556
16.22	3.49399	2.90553	16.22	2.3471	1.8295
16.24	3.35905	2.85756	16.24	2.39831	1.55374
16.26	3.19349	2.87538	16.26	2.40243	1.73893
16.28	3.27141	2.88706	16.28	2.32078	1.85314
16.3	3.09005	2.81266	16.3	2.36336	1.93295
16.32	3.17462	2.74029	16.32	2.40642	1.8624
16.34	3.15537	2.8151	16.34	2.37706	2.10568
16.36	3.04756	2.87477	16.36	2.34353	2.15478
16.38	3.2005	2.93566	16.38	2.47509	2.2511
16.4	3.06869	2.76719	16.4	2.60474	2.3793
16.42	3.03067	2.89789	16.42	2.55647	1.726
16.44	2.89839	2.86226	16.44	2.54042	1.93874
16.46	2.98913	2.78853	16.46	2.4104	1.80858
16.48	3.10634	2.74869	16.48	2.36817	1.5946
16.5	2.89424	2.8575	16.5	2.52022	2.04618
16.52	2.89022	2.79577	16.52	2.53293	1.63029
16.54	2.90729	2.80419	16.54	2.4702	1.94995
16.56	2.97383	2.76113	16.56	2.40291	1.89999
16.58	2.93209	2.74177	16.58	2.41417	1.66078
16.6	2.86572	2.86945	16.6	2.38883	1.90831
16.62	2.88505	2.79174	16.62	2.40538	1.91231
16.64	2.6494	2.82647	16.64	2.45327	1.81927
16.66	2.75759	2.81937	16.66	2.41076	1.94543
16.68	2.7744	2.82795	16.68	2.35335	1.79226
16.7	2.76629	2.84956	16.7	2.41591	1.79976
16.72	3.03567	2.82797	16.72	2.50695	1.92756
16.74	3.12602	2.81035	16.74	2.40227	1.63909
16.76	2.93738	2.81151	16.76	2.34767	1.76605
16.78	2.78394	2.81264	16.78	2.44715	1.44026
16.8	2.83959	2.71374	16.8	2.57626	1.45124
16.82	2.83094	2.80302	16.82	2.57269	1.35219
16.84	2.87683	2.75833	16.84	2.51285	1.53349
16.86	2.9174	2.74742	16.86	2.48567	2.3002
16.88	2.90105	2.86404	16.88	2.41599	1.58795
16.9	2.93463	2.84186	16.9	2.44192	2.04262
16.92	2.96506	2.93433	16.92	2.34735	1.90025
16.94	3.1087	2.79571	16.94	2.46794	1.5204
16.96	3.07865	2.95934	16.96	2.60924	1.64444
16.98	3.08802	2.84729	16.98	2.58252	1.89091
17	2.98987	2.81877	17	2.51551	1.90844
17.02	2.99961	2.84047	17.02	2.54845	2.4859
17.04	2.9765	2.80638	17.04	2.51606	2.28272
17.06	3.08788	2.87654	17.06	2.52072	1.902
17.08	3.34227	2.93289	17.08	2.51006	2.13415
17.1	3.06324	2.84761	17.1	2.55667	2.03855
17.12	2.95441	2.79859	17.12	2.38996	3.03808
17.14	2.91431	2.95309	17.14	2.46434	2.70405
17.16	2.83711	2.86193	17.16	2.50474	3.45557
17.18	3.05752	2.91325	17.18	2.52691	2.71664
17.2	3.0758	2.95386	17.2	2.3195	2.5797
17.22	3.16202	3.08656	17.22	2.55671	2.35069
17.24	3.02797	2.93738	17.24	2.60641	2.31392
17.26	3.15466	3.01945	17.26	2.60456	1.79151
17.28	3.2238	3.04531	17.28	2.56759	2.73373
17.3	3.0751	2.96712	17.3	2.46056	2.64393
17.32	3.20546	2.92669	17.32	2.50191	3.02402
17.34	2.92829	3.07031	17.34	2.42942	2.9511
17.36	3.07192	2.96557	17.36	2.47129	3.0208
17.38	2.94433	2.95481	17.38	2.49372	3.13628
17.4	2.97805	2.9141	17.4	2.50837	3.18117
17.42	2.91851	3.12864	17.42	2.5729	3.19478
17.44	2.8418	3.18558	17.44	2.4553	3.1263
17.46	2.86233	3.0192	17.46	2.45053	3.07084
17.48	2.78415	2.96831	17.48	2.53428	2.99146
17.5	2.75669	2.98312	17.5	2.50186	3.10371
17.52	2.70759	3.05257	17.52	2.49008	3.14922
17.54	2.65892	3.13272	17.54	2.48758	3.08327
17.56	2.79445	2.86971	17.56	2.47441	2.92505
17.58	2.69712	2.98762	17.58	2.38884	3.06391
17.6	2.67134	3.04943	17.6	2.35689	3.09331
17.62	2.72278	2.96756	17.62	2.42812	3.15928
17.64	2.6452	3.00355	17.64	2.52062	3.11164
17.66	2.66996	3.03057	17.66	2.51212	3.22435
17.68	2.54532	2.9845	17.68	2.4591	3.13414
17.7	2.45503	2.92324	17.7	2.38709	3.07814
17.72	2.52185	2.88674	17.72	2.48615	1.97638
17.74	2.52376	2.92709	17.74	2.46552	1.8609
17.76	2.4848	2.97625	17.76	2.44221	1.82318
17.78	2.69418	2.96989	17.78	2.40043	1.9374
17.8	2.59035	2.87898	17.8	2.52225	1.86639
17.82	2.71259	2.86023	17.82	2.53142	2.21425
17.84	2.8141	2.97551	17.84	2.53681	1.84376
17.86	2.76987	2.8749	17.86	2.51633	2.31073
17.88	2.70935	3.06987	17.88	2.59712	1.39455
17.9	2.70926	3.03152	17.9	2.32239	1.45537
17.92	2.69488	3.0628	17.92	2.33567	1.78256
17.94	2.72439	3.06268	17.94	2.42004	1.70876
17.96	2.63276	3.10866	17.96	2.46148	1.71652
17.98	2.68088	3.15109	17.98	2.40892	1.65821
18	2.58404	3.0071	18	2.39861	1.27918
18.02	2.47643	2.98209	18.02	2.49183	1.65964
18.04	2.47361	2.88083	18.04	2.51956	1.4976
18.06	2.53664	2.72617	18.06	2.55059	1.67748
18.08	2.50769	2.8119	18.08	2.53893	1.72826
18.1	2.54572	2.84844	18.1	2.54758	1.83356
18.12	2.58237	2.8322	18.12	2.43101	1.61182
18.14	2.58573	2.80065	18.14	2.42277	1.47252
18.16	2.59825	2.87276	18.16	2.32176	1.37967
18.18	2.56588	2.76028	18.18	2.40032	1.6157
18.2	2.55526	2.74024	18.2	2.38959	1.82082
18.22	2.48109	2.73966	18.22	2.43669	2.34536
18.24	2.55545	2.81054	18.24	2.51871	2.08393
18.26	2.73306	2.93183	18.26	2.34635	2.87847
18.28	2.75039	2.93936	18.28	2.30817	3.0619
18.3	2.73813	2.65205	18.3	2.4323	3.14586
18.32	2.80967	2.87839	18.32	2.38048	2.97461
18.34	2.75183	2.90909	18.34	2.53392	3.27073
18.36	2.80496	2.96464	18.36	2.51025	3.16507
18.38	2.80908	3.06148	18.38	2.42137	2.96294
18.4	2.85106	3.07357	18.4	2.44604	3.43046
18.42	3.04081	2.94673	18.42	2.39191	3.21241
18.44	2.89386	2.80447	18.44	2.38788	2.9717
18.46	2.84433	2.94083	18.46	2.4211	2.82576
18.48	2.72745	2.79966	18.48	2.33701	3.09182
18.5	2.72986	2.75869	18.5	2.40132	3.14929
18.52	2.74988	2.69642	18.52	2.47319	3.11441
18.54	2.88484	2.89779	18.54	2.5171	3.32234
18.56	2.83477	2.93701	18.56	2.43866	3.16474
18.58	2.85269	2.93749	18.58	2.43348	3.13825
18.6	2.77801	2.91762	18.6	2.56572	3.27523
18.62	2.71004	2.92389	18.62	2.49094	2.95572
18.64	2.67592	2.84049	18.64	2.53107	3.3936
18.66	2.70756	2.92784	18.66	2.53424	3.33887
18.68	2.72817	2.89667	18.68	2.62075	3.26793
18.7	2.52367	2.84696	18.7	2.49987	2.85145
18.72	2.69154	2.96746	18.72	2.52846	2.85396
18.74	2.64285	2.94036	18.74	2.46068	3.07497
18.76	2.70864	2.85427	18.76	2.45753	3.15823
18.78	2.89742	2.97943	18.78	2.46768	3.19793
18.8	2.61716	2.95393	18.8	2.46618	3.13467
18.82	2.66635	2.84719	18.82	2.43148	3.27377
18.84	2.53895	2.93362	18.84	2.49329	3.03104
18.86	2.51825	2.85212	18.86	2.41985	3.03787
18.88	2.6992	2.94298	18.88	2.44729	3.07405
18.9	2.50767	2.85676	18.9	2.49919	2.83064
18.92	2.69246	3.01173	18.92	2.36317	3.00084
18.94	2.71021	2.89507	18.94	2.65871	3.27497
18.96	2.7522	2.96713	18.96	2.55078	3.13553
18.98	2.67625	2.98403	18.98	2.51865	3.11554
19	2.69388	2.85191	19	2.48335	3.17419
19.02	2.71307	3.24939	19.02	2.46102	3.0845
19.04	2.7061	3.04999	19.04	2.42028	3.11192
19.06	2.63582	3.03238	19.06	2.48158	2.95853
19.08	2.60802	2.90354	19.08	2.50213	3.0834
19.1	2.59137	2.96468	19.1	2.51208	3.12593
19.12	2.58534	3.03992	19.12	2.48418	3.05369
19.14	2.53705	3.04137	19.14	2.46137	3.32713
19.16	2.33296	2.97914	19.16	2.48633	3.21343
19.18	2.44598	2.77296	19.18	2.5201	2.78154
19.2	2.4778	2.97538	19.2	2.32277	2.94864
19.22	2.48938	2.96994	19.22	2.47122	3.11762
19.24	2.49994	3.18407	19.24	2.49934	3.23168
19.26	2.40815	2.84491	19.26	2.41192	2.94838
19.28	2.47843	2.63421	19.28	2.4932	2.62545
19.3	2.57485	2.64502	19.3	2.43861	2.34366
19.32	2.45866	2.70878	19.32	2.28705	2.85158
19.34	2.54575	2.50863	19.34	2.45205	3.04173
19.36	2.62781	2.56524	19.36	2.37048	2.95846
19.38	2.73464	2.73522	19.38	2.52178	2.7108
19.4	2.81005	2.67085	19.4	2.43267	2.98808
19.42	2.69506	2.59604	19.42	2.5137	2.83022
19.44	2.7194	2.53601	19.44	2.44471	2.97263
19.46	2.67093	2.46057	19.46	2.45265	3.10049
19.48	2.59648	2.52525	19.48	2.49821	2.79608
19.5	2.53843	2.72675	19.5	2.51558	2.68823
19.52	2.46893	2.37562	19.52	2.5179	2.26027
19.54	2.55592	1.60944	19.54	2.66965	2.34502
19.56	2.63551	2.27673	19.56	2.48409	2.25429
19.58	2.63834	2.5291	19.58	2.53629	1.68355
19.6	2.50987	2.68024	19.6	2.48695	2.32847
19.62	2.43332	2.04294	19.62	2.53385	1.95293
19.64	2.35899	2.31448	19.64	2.5454	2.71994
19.66	2.29223	2.2247	19.66	2.45798	2.95832
19.68	2.54685	2.32589	19.68	2.46605	2.75466
19.7	2.38335	2.56797	19.7	2.31771	2.52831
19.72	2.17096	2.5715	19.72	2.37049	2.9457
19.74	2.29971	2.81365	19.74	2.2928	3.08379
19.76	2.28112	2.61107	19.76	2.43773	3.11907
19.78	2.39193	2.63362	19.78	2.44253	2.61175
19.8	2.32775	2.69212	19.8	2.37686	3.22053
19.82	2.25627	2.82411	19.82	2.60554	3.07747
19.84	2.32586	2.8752	19.84	2.51107	3.23153
19.86	2.20123	3.00923	19.86	2.53694	3.16588
19.88	2.39029	2.77703	19.88	2.44351	3.23863
19.9	2.35097	2.83766	19.9	2.22254	3.11701
19.92	2.54332	2.87914	19.92	2.17817	3.34185
19.94	2.4709	2.70152	19.94	2.31967	2.92777
19.96	2.40093	2.42935	19.96	2.35652	3.06761
19.98	2.406	2.61132	19.98	2.20782	3.11687
20	2.52768	2.47315	20	2.1652	3.24615
20.02	2.37377	2.80723	20.02	2.21822	3.10728
20.04	2.4345	2.3942	20.04	2.23246	3.02265
20.06	2.41725	2.53677	20.06	2.22092	3.1176
20.08	2.47641	2.81408	20.08	2.2415	2.98971
20.1	2.50255	2.75792	20.1	2.15182	3.02466
20.12	2.56461	2.86598	20.12	2.17778	3.02331
20.14	2.47258	2.83845	20.14	2.18507	2.92556
20.16	2.47763	2.85842	20.16	2.09287	3.07043
20.18	2.62171	2.85897	20.18	2.16983	3.2449
20.2	2.71358	2.93814	20.2	2.3065	3.05084
20.22	2.65825	2.85919	20.22	2.25659	2.97901
20.24	2.56904	2.8412	20.24	2.15031	3.08144
20.26	2.77192	2.76643	20.26	2.23105	2.9854
20.28	2.61649	2.75572	20.28	2.28073	3.07239
20.3	2.58694	2.86287	20.3	2.30239	3.05578
20.32	2.57608	2.86811	20.32	2.44584	3.03025
20.34	2.58216	2.99406	20.34	2.42308	3.00736
20.36	2.49429	2.86314	20.36	2.41529	3.16145
20.38	2.65467	2.83934	20.38	2.23393	3.22329
20.4	2.7229	2.86339	20.4	2.27182	3.03702
20.42	2.58366	2.87872	20.42	2.3338	3.02649
20.44	2.46732	2.84883	20.44	2.2342	3.15703
20.46	2.46004	2.82634	20.46	2.32898	3.08916
20.48	2.55382	3.00853	20.48	2.25824	3.02491
20.5	2.59493	2.89964	20.5	2.05297	2.98427
20.52	2.64869	3.02757	20.52	2.16583	3.03249
20.54	2.64057	2.72247	20.54	2.14806	2.98486
20.56	2.78047	2.64984	20.56	2.13636	3.05801
20.58	2.70564	2.7339	20.58	2.21589	3.0967
20.6	2.79109	2.55188	20.6	2.32271	3.09402
20.62	2.82131	2.67712	20.62	2.21242	3.0628
20.64	2.78937	3.03781	20.64	2.07569	3.07015
20.66	2.79727	2.94193	20.66	2.11176	2.99937
20.68	2.69495	2.94937	20.68	2.15277	3.12219
20.7	2.49825	3.04132	20.7	2.1573	3.05923
20.72	2.70903	3.05568	20.72	2.10562	3.13714
20.74	2.70148	2.94514	20.74	2.15228	2.96638
20.76	2.78173	2.76761	20.76	2.18512	3.09798
20.78	2.59938	2.93812	20.78	2.06959	3.08884
20.8	2.6636	2.94372	20.8	2.19034	2.97222
20.82	2.60175	2.94682	20.82	2.14342	3.15828
20.84	2.58492	3.07312	20.84	2.20698	3.10204
20.86	2.59754	2.8916	20.86	2.34291	3.16966
20.88	2.71237	2.94433	20.88	2.23102	3.14369
20.9	2.4612	2.92987	20.9	2.21332	2.91475
20.92	2.55952	3.00127	20.92	2.09838	3.18653
20.94	2.47124	2.97751	20.94	2.2155	3.0946
20.96	2.47938	3.08075	20.96	2.22324	3.09789
20.98	2.5755	3.04484	20.98	2.30719	3.15412
21	2.60882	3.01595	21	2.4037	3.14205
21.02	2.75119	3.04395	21.02	2.31332	3.41577
21.04	2.6621	2.95329	21.04	2.36953	3.27617
21.06	2.7369	3.07558	21.06	2.24393	3.28184
21.08	2.67212	3.06655	21.08	2.19818	3.35296
21.1	2.82149	3.01218	21.1	2.23425	3.24349
21.12	2.74561	2.98413	21.12	2.17647	3.13885
21.14	2.74076	3.0546	21.14	2.25182	3.16179
21.16	2.76904	2.97841	21.16	2.17275	3.25916
21.18	2.77063	3.10146	21.18	2.26828	3.05606
21.2	2.72308	2.88052	21.2	2.20819	3.13531
21.22	2.82217	3.05713	21.22	2.20711	3.21018
21.24	2.80683	2.96715	21.24	2.20498	3.1208
21.26	2.82727	2.8911	21.26	2.33589	3.21742
21.28	2.7965	2.82614	21.28	2.2975	3.40182
21.3	2.92309	2.82551	21.3	2.40288	3.02438
21.32	3.05848	2.87469	21.32	2.31102	3.10761
21.34	3.05604	2.89967	21.34	2.26939	3.2808
21.36	3.07141	3.03464	21.36	2.17388	3.12908
21.38	2.81759	3.02069	21.38	2.27174	3.20861
21.4	2.89942	2.88995	21.4	2.18732	3.08847
21.42	2.92205	2.98626	21.42	2.057	2.76717
21.44	3.00131	2.89829	21.44	2.01751	2.60111
21.46	2.842	2.91901	21.46	2.00127	2.71571
21.48	2.8861	2.95876	21.48	1.87829	3.06219
21.5	2.87601	2.8288	21.5	1.9503	3.17976
21.52	2.93953	2.78386	21.52	1.90927	3.0108
21.54	3.00625	2.83902	21.54	1.86131	3.16817
21.56	2.91743	2.79296	21.56	1.90725	3.16773
21.58	2.89603	2.80813	21.58	1.89039	3.12087
21.6	2.77725	2.88574	21.6	1.88266	3.13323
21.62	2.84186	2.86591	21.62	1.9286	3.38112
21.64	2.72268	2.7479	21.64	1.87327	3.52576
21.66	2.80985	2.94962	21.66	1.9369	2.92848
21.68	2.90203	2.88544	21.68	1.95228	2.71643
21.7	2.88973	2.87817	21.7	2.07093	2.98944
21.72	2.92907	2.86309	21.72	2.0301	2.74489
21.74	2.90738	2.94502	21.74	1.99951	2.76375
21.76	2.93775	2.89403	21.76	2.16745	2.84448
21.78	2.87469	2.83832	21.78	2.18675	2.82406
21.8	2.68763	2.87379	21.8	2.12884	2.93397
21.82	2.70383	2.82085	21.82	2.13237	2.81215
21.84	2.6574	2.9235	21.84	2.14052	2.89709
21.86	2.84274	2.86778	21.86	2.20286	2.82073
21.88	2.92486	2.88964	21.88	2.15071	2.79203
21.9	2.95423	2.93736	21.9	2.22191	2.77665
21.92	3.07821	2.97386	21.92	2.07322	2.69538
21.94	2.91702	2.8813	21.94	2.23654	3.09918
21.96	2.97964	2.89323	21.96	2.13668	2.95055
21.98	2.75699	2.87522	21.98	2.23092	2.85122
22	2.7612	2.88778	22	2.20932	2.94611
22.02	2.83271	2.97408	22.02	2.10363	2.94934
22.04	2.81699	2.91534	22.04	2.1113	3.17374
22.06	2.77483	2.83727	22.06	2.11073	3.03001
22.08	2.80535	3.09035	22.08	1.95604	2.96346
22.1	2.84936	3.00061	22.1	2.01075	3.15067
22.12	2.79394	2.78515	22.12	2.05057	2.9482
22.14	2.83546	2.77589	22.14	1.9797	3.00126
22.16	2.77146	2.92322	22.16	2.01982	3.31903
22.18	2.82855	2.75938	22.18	2.12631	3.02332
22.2	2.72642	2.96575	22.2	2.1008	2.71834
22.22	2.87825	2.94401	22.22	1.92138	2.78439
22.24	2.88865	2.92176	22.24	1.9264	2.61426
22.26	3.10385	2.90765	22.26	2.06549	2.89242
22.28	2.95607	2.919	22.28	2.07102	2.8348
22.3	3.11879	2.89696	22.3	1.95085	2.78522
22.32	2.92765	2.99306	22.32	1.9836	2.72136
22.34	3.08915	3.03264	22.34	1.88682	2.84279
22.36	3.12272	3.00275	22.36	1.97701	2.84407
22.38	3.16146	2.88248	22.38	1.8869	2.81373
22.4	3.08247	2.84783	22.4	1.79208	2.84965
22.42	3.06709	2.91223	22.42	1.86918	2.57654
22.44	3.33966	2.79214	22.44	2.08561	2.82678
22.46	3.16976	2.77887	22.46	2.11587	2.7458
22.48	3.33312	2.81804	22.48	2.04277	2.71753
22.5	3.23234	2.84467	22.5	2.09309	2.81073
22.52	3.32588	2.71829	22.52	2.09162	2.97116
22.54	3.29205	2.75987	22.54	2.23738	2.89997
22.56	3.20356	2.67505	22.56	2.2564	2.78922
22.58	3.18681	2.84275	22.58	2.35188	2.76097
22.6	3.12162	2.77528	22.6	2.17512	2.90857
22.62	3.08191	2.86308	22.62	2.11587	2.93509
22.64	3.01115	2.80254	22.64	2.19433	2.84683
22.66	3.05386	2.85097	22.66	2.23693	2.20854
22.68	3.11966	2.92261	22.68	2.28466	2.599
22.7	3.08312	2.93267	22.7	2.30137	2.62313
22.72	2.95624	2.81	22.72	2.34987	2.47391
22.74	3.02419	2.72636	22.74	2.14387	2.77279
22.76	3.03738	2.81985	22.76	2.0886	2.65308
22.78	3.14511	2.77952	22.78	2.07514	2.29917
22.8	3.15305	2.82414	22.8	2.09658	2.77821
22.82	3.10329	2.86274	22.82	2.0425	2.82092
22.84	2.97462	2.85627	22.84	2.18114	2.66752
22.86	3.04539	2.86058	22.86	2.04402	2.80724
22.88	3.05829	2.8451	22.88	2.13479	2.68023
22.9	3.09954	2.8311	22.9	2.01483	2.88107
22.92	3.14574	2.77704	22.92	2.07949	2.96618
22.94	3.04203	2.75845	22.94	2.00324	2.63334
22.96	3.06443	2.82153	22.96	2.01055	2.90337
22.98	3.04923	2.75089	22.98	1.89981	2.43713
23	2.98027	2.77181	23	1.99324	2.95531
23.02	2.87371	2.80348	23.02	1.82904	2.77141
23.04	2.99134	2.90909	23.04	1.94543	2.70332
23.06	2.95442	2.77726	23.06	1.94261	2.60961
23.08	2.95003	2.85737	23.08	2.03703	2.8452
23.1	2.70861	2.94297	23.1	2.07565	2.90299
23.12	2.91592	2.92043	23.12	2.19066	2.75048
23.14	2.77952	2.84609	23.14	2.14769	2.92041
23.16	3.03361	2.84834	23.16	2.12502	2.90983
23.18	3.09096	2.86645	23.18	2.1848	2.87742
23.2	3.03652	2.82659	23.2	2.22078	2.74467
23.22	3.13786	2.90134	23.22	2.35605	2.73528
23.24	3.2211	2.8053	23.24	2.20238	2.72062
23.26	2.96805	2.88833	23.26	2.11342	2.48803
23.28	3.02068	2.80815	23.28	2.07928	2.72702
23.3	2.81218	2.95645	23.3	2.30386	2.642
23.32	2.65301	3.00462	23.32	2.07939	2.73575
23.34	2.85619	2.82846	23.34	2.18389	2.67348
23.36	2.90377	2.78891	23.36	2.14144	2.57465
23.38	2.86041	2.83608	23.38	2.1573	2.64595
23.4	2.84265	2.76492	23.4	2.06575	2.58275
23.42	2.7318	2.8724	23.42	2.09357	2.56632
23.44	2.67453	2.76495	23.44	2.01857	2.63309
23.46	2.69829	2.79185	23.46	2.18956	2.6581
23.48	2.67801	2.82271	23.48	2.09669	2.86754
23.5	2.67858	2.78325	23.5	2.1722	2.63462
23.52	2.63725	2.92433	23.52	2.31895	2.64768
23.54	2.56822	2.81622	23.54	2.33622	2.68509
23.56	2.62117	2.81244	23.56	2.30844	2.80861
23.58	2.61142	2.85607	23.58	2.33287	2.73927
23.6	2.5471	2.89056	23.6	2.38287	2.7127
23.62	2.82852	2.87523	23.62	2.3008	2.75221
23.64	2.78933	2.98573	23.64	2.27713	2.84699
23.66	3.0178	3.01881	23.66	2.22307	2.60287
23.68	2.95225	2.9565	23.68	2.23233	2.61858
23.7	2.94154	2.88103	23.7	2.12823	2.63612
23.72	2.64731	3.16832	23.72	2.22232	2.67081
23.74	2.44985	3.20774	23.74	2.1346	2.72483
23.76	2.61013	3.02822	23.76	2.1556	2.88569
23.78	2.71731	3.09119	23.78	2.29465	2.75104
23.8	2.66415	3.03244	23.8	2.37425	2.78389
23.82	2.73214	3.05887	23.82	2.40714	2.9597
23.84	2.45892	2.93114	23.84	2.27137	3.28836
23.86	2.44544	2.79307	23.86	2.29211	3.23294
23.88	2.49982	2.87945	23.88	2.1655	2.98825
23.9	2.54145	2.8425	23.9	2.26574	3.1159
23.92	2.53159	2.81132	23.92	2.32501	3.10398
23.94	2.74295	2.88227	23.94	2.25537	2.94718
23.96	2.7309	2.74449	23.96	2.28968	2.7253
23.98	2.56684	2.89461	23.98	2.30449	2.74168
24	2.45599	2.87796	24	2.25827	2.81204
24.02	2.57095	2.75969	24.02	2.16282	2.53475
24.04	2.57149	2.74984	24.04	2.36192	2.66761
24.06	2.57152	2.82448	24.06	2.14216	2.55228
24.08	2.65043	2.86344	24.08	2.19608	2.90533
24.1	2.71633	2.94069	24.1	2.14175	2.61552
24.12	2.77193	2.9235	24.12	2.18197	2.42395
24.14	2.64483	2.79578	24.14	2.19951	2.86266
24.16	2.78559	2.88324	24.16	2.11293	2.92433
24.18	2.77474	2.93538	24.18	2.121	2.38778
24.2	2.88414	2.88138	24.2	2.17973	2.57414
24.22	2.81755	2.94946	24.22	2.18333	2.56321
24.24	2.87035	2.90283	24.24	2.29768	2.88249
24.26	2.67953	2.98392	24.26	2.17345	3.06608
24.28	2.63837	2.94704	24.28	2.12461	2.93873
24.3	2.67459	2.99604	24.3	2.09463	2.94579
24.32	2.71411	3.08781	24.32	2.12401	2.97181
24.34	2.74756	2.96387	24.34	2.16091	2.87406
24.36	2.73156	3.06292	24.36	2.23078	2.68896
24.38	2.86959	2.93343	24.38	2.21932	2.96613
24.4	2.78198	2.81653	24.4	2.34414	2.78923
24.42	2.73355	2.90234	24.42	2.3145	2.79957
24.44	2.61889	2.84043	24.44	2.3901	2.96297
24.46	2.70901	2.86834	24.46	2.37057	2.71532
24.48	2.79611	2.94204	24.48	2.41214	2.84451
24.5	2.56769	2.78069	24.5	2.37594	2.8329
24.52	2.7051	2.72893	24.52	2.35427	2.87471
24.54	2.84114	2.85902	24.54	2.24376	2.89707
24.56	2.95166	2.83534	24.56	2.2184	2.85956
24.58	2.87282	2.85303	24.58	2.1996	2.83865
24.6	2.95657	2.8811	24.6	2.29895	2.71424
24.62	2.99981	3.01174	24.62	2.24377	2.92456
24.64	3.02356	2.9773	24.64	2.08496	3.07231
24.66	2.83743	2.89232	24.66	2.0584	2.82926
24.68	2.79663	2.84867	24.68	2.22548	2.97648
24.7	2.85771	2.85781	24.7	2.06552	3.0667
24.72	3.02832	2.86472	24.72	1.96234	2.94897
24.74	2.92985	2.91654	24.74	2.05992	2.95884
24.76	3.12731	2.8161	24.76	2.01331	3.0835
24.78	2.99611	2.86915	24.78	1.96763	3.37524
24.8	3.00577	2.91744	24.8	2.01829	3.21027
24.82	2.91261	2.85642	24.82	1.99494	3.13912
24.84	2.80692	2.9531	24.84	2.03455	3.20131
24.86	2.85856	2.85822	24.86	2.08276	3.02774
24.88	2.81446	2.85915	24.88	2.09408	2.90752
24.9	2.72187	2.76643	24.9	2.04947	2.84397
24.92	2.72816	2.78273	24.92	2.03195	2.97783
24.94	2.82319	2.8596	24.94	2.03692	2.74014
24.96	2.86012	2.82666	24.96	2.1997	2.90831
24.98	2.94141	2.79716	24.98	2.07818	3.21277
25	2.93854	2.83669	25	2.03372	2.84359
25.02	2.73667	2.81976	25.02	2.11098	2.88806
25.04	2.66312	2.83541	25.04	2.15871	2.80017
25.06	2.74302	2.89163	25.06	2.04936	2.63304
25.08	2.81783	2.80226	25.08	2.00756	2.71141
25.1	2.84594	2.82969	25.1	2.03298	2.68262
25.12	2.66309	2.79951	25.12	2.11081	3.03714
25.14	2.55519	2.77073	25.14	2.17784	3.0516
25.16	2.65167	2.81203	25.16	2.09804	3.13467
25.18	2.58357	2.82752	25.18	2.25372	2.95815
25.2	2.77424	2.92942	25.2	2.06056	3.15875
25.22	2.66164	2.91403	25.22	2.14626	3.11337
25.24	2.722	2.97029	25.24	2.17654	2.63339
25.26	2.77756	2.86172	25.26	1.98054	3.0856
25.28	2.93848	3.10233	25.28	1.82937	3.18607
25.3	2.98766	2.95163	25.3	1.90712	3.09727
25.32	2.97709	3.01417	25.32	2.14444	3.13425
25.34	3.09411	3.05636	25.34	1.9269	2.93293
25.36	3.05656	2.77714	25.36	1.90372	3.00682
25.38	2.91117	3.073	25.38	2.01139	3.11512
25.4	3.01148	3.00449	25.4	2.04794	2.80854
25.42	2.93028	3.13361	25.42	2.06192	2.89854
25.44	3.0988	3.10135	25.44	2.06491	2.82858
25.46	3.0985	3.08433	25.46	2.08115	3.1769
25.48	2.99782	3.1353	25.48	2.15566	3.01439
25.5	2.87646	3.07503	25.5	2.09181	2.90639
25.52	2.99061	3.0369	25.52	2.03036	3.12762
25.54	2.94568	3.05232	25.54	2.16047	2.96599
25.56	2.82053	2.935	25.56	2.08823	2.74271
25.58	2.89204	2.79996	25.58	2.29026	3.43413
25.6	2.84952	3.09118	25.6	2.1904	3.0379
25.62	2.84779	3.2297	25.62	2.15746	2.9136
25.64	2.89429	3.04105	25.64	2.1445	2.5845
25.66	2.86383	3.09959	25.66	2.11227	2.77456
25.68	2.74783	3.29773	25.68	2.09318	3.13175
25.7	2.84661	3.30252	25.7	2.13552	3.12055
25.72	2.61626	3.15577	25.72	2.08899	3.18546
25.74	2.84295	2.92429	25.74	2.1333	3.00036
25.76	2.80541	2.97767	25.76	2.01402	3.09175
25.78	2.92907	2.95839	25.78	2.02969	2.98645
25.8	3.01271	2.87801	25.8	2.05606	3.0279
25.82	2.95207	2.9379	25.82	2.2314	3.04279
25.84	2.91255	3.0847	25.84	2.33263	3.00757
25.86	2.87077	2.92227	25.86	2.15468	2.99958
25.88	2.82521	2.90708	25.88	2.23291	2.90393
25.9	3.02603	2.92215	25.9	2.04514	2.88838
25.92	2.827	2.91246	25.92	2.12412	2.9797
25.94	2.8202	2.63722	25.94	2.19273	2.90838
25.96	2.5957	3.018	25.96	2.14973	3.06565
25.98	2.59339	3.12773	25.98	2.06044	2.8965
26	2.47116	2.84302	26	2.01187	2.88859
26.02	2.64766	2.95964	26.02	2.05242	2.87599
26.04	2.70493	3.09499	26.04	2.17696	3.03409
26.06	2.71992	3.07699	26.06	2.15675	2.68679
26.08	2.89562	3.12673	26.08	2.05026	2.92691
26.1	3.03023	3.09499	26.1	2.0952	2.99791
26.12	3.16854	2.84757	26.12	2.08877	2.93206
26.14	3.01864	2.73697	26.14	2.15982	3.3216
26.16	3.00572	2.60348	26.16	2.1568	3.03344
26.18	3.01362	2.7032	26.18	2.16945	3.36658
26.2	2.84109	2.77519	26.2	2.11453	3.3317
26.22	2.86187	3.01332	26.22	2.10815	2.97742
26.24	2.94515	2.90733	26.24	1.99485	3.10398
26.26	2.98535	2.87667	26.26	2.11818	3.28818
26.28	3.05192	2.88445	26.28	2.20288	3.26383
26.3	2.95135	2.79841	26.3	2.32807	3.42588
26.32	2.79115	2.87809	26.32	2.06087	2.98489
26.34	2.85944	2.82877	26.34	2.05815	2.95168
26.36	2.9322	2.73731	26.36	2.10849	2.9244
26.38	2.96568	2.9346	26.38	2.06557	2.87519
26.4	2.78275	2.92443	26.4	2.05707	3.01566
26.42	2.80859	2.87305	26.42	2.21736	2.76454
26.44	2.87785	2.79962	26.44	2.22799	2.68248
26.46	2.86632	2.66487	26.46	2.14965	2.69927
26.48	2.83218	2.92733	26.48	2.11992	3.06666
26.5	2.73513	2.86858	26.5	2.13282	2.63602
26.52	2.78745	2.75415	26.52	2.06166	2.67117
26.54	2.85975	3.04964	26.54	2.25088	2.67975
26.56	2.85515	2.71806	26.56	2.19275	2.67378
26.58	2.80216	2.61139	26.58	2.3739	2.62571
26.6	2.78662	2.75935	26.6	2.19863	2.73094
26.62	2.77166	2.97095	26.62	2.13004	2.63482
26.64	2.86133	2.90462	26.64	2.07613	2.51658
26.66	2.86015	2.85263	26.66	2.1175	2.67718
26.68	2.91812	2.98674	26.68	2.18154	2.94581
26.7	2.80518	3.03251	26.7	2.35495	2.95943
26.72	2.76659	2.91258	26.72	2.28302	3.16559
26.74	2.70835	3.0636	26.74	2.12979	3.34577
26.76	2.83591	3.05956	26.76	2.11877	3.09081
26.78	3.06898	2.95442	26.78	2.23035	3.47938
26.8	3.00485	2.94396	26.8	2.09859	3.16531
26.82	2.89894	2.9257	26.82	2.1437	3.41162
26.84	2.80499	3.09958	26.84	2.25033	3.3447
26.86	2.80684	2.83791	26.86	2.17033	3.33031
26.88	2.84801	2.98137	26.88	2.05495	3.27801
26.9	2.70212	2.92455	26.9	1.99518	2.91804
26.92	2.85135	2.94287	26.92	1.92355	2.97048
26.94	2.81535	2.94613	26.94	2.00622	3.16106
26.96	2.94939	3.01257	26.96	2.03867	3.19159
26.98	2.96622	2.50041	26.98	2.00597	3.16624
27	2.90502	2.68544	27	1.97386	3.21035
27.02	2.94639	2.16148	27.02	2.09184	3.1508
27.04	2.87449	2.78457	27.04	2.0589	3.12005
27.06	2.78965	2.73934	27.06	2.07992	3.06389
27.08	3.00729	2.76762	27.08	2.01713	2.98125
27.1	2.94476	2.82879	27.1	1.96892	3.27443
27.12	2.96629	2.94619	27.12	2.05692	3.35184
27.14	3.03824	2.89934	27.14	2.14279	3.04823
27.16	3.02053	2.76139	27.16	2.19543	3.18275
27.18	3.16137	2.70525	27.18	2.15101	3.12445
27.2	3.04641	2.85199	27.2	2.09474	2.99859
27.22	2.95952	2.68604	27.22	1.95734	2.99955
27.24	2.89783	2.72153	27.24	2.14731	3.10961
27.26	2.82464	2.8408	27.26	1.91404	3.11716
27.28	2.90679	2.76489	27.28	1.804	3.11072
27.3	2.83519	2.95994	27.3	1.96891	3.13438
27.32	2.64245	3.03485	27.32	1.96204	3.08337
27.34	2.6658	2.96221	27.34	1.97783	3.00574
27.36	2.70821	2.86338	27.36	2.0682	2.90654
27.38	2.69203	2.89732	27.38	1.9435	3.05767
27.4	2.74722	2.60961	27.4	1.89663	3.14697
27.42	2.7619	2.90904	27.42	1.84353	3.34531
27.44	2.63131	2.95598	27.44	1.93099	3.22665
27.46	2.61648	2.86506	27.46	1.95695	3.14417
27.48	2.6414	2.56972	27.48	2.2454	3.1134
27.5	2.46797	2.6	27.5	2.12255	3.05858
27.52	2.58508	2.85415	27.52	2.19775	3.08899
27.54	2.57122	2.73908	27.54	2.11462	3.06508
27.56	2.50811	2.69883	27.56	2.01091	3.1058
27.58	2.56943	2.74636	27.58	1.97802	2.92934
27.6	2.80084	2.79848	27.6	2.22939	3.01706
27.62	2.72692	2.80154	27.62	2.08628	3.097
27.64	2.69704	2.93846	27.64	2.09903	3.10031
27.66	2.73674	2.94633	27.66	2.19711	3.24962
27.68	2.76581	2.62321	27.68	2.10935	3.46581
27.7	2.72854	2.47871	27.7	2.17979	3.09762
27.72	2.71387	2.23064	27.72	2.14949	3.28426
27.74	2.66922	2.15725	27.74	2.14926	3.307
27.76	2.48779	2.07459	27.76	2.26936	3.44196
27.78	2.53754	1.97438	27.78	2.25079	3.27041
27.8	2.55417	1.8938	27.8	2.17629	3.41818
27.82	2.69971	1.97521	27.82	2.21218	3.45812
27.84	2.70849	1.7051	27.84	2.12958	3.35029
27.86	2.74997	1.94689	27.86	2.21421	3.41343
27.88	2.82331	1.88359	27.88	2.17825	3.3357
27.9	2.82937	1.9933	27.9	2.15957	3.22836
27.92	2.67762	1.57057	27.92	2.04441	3.16702
27.94	2.66811	1.93138	27.94	2.17233	3.13445
27.96	2.45097	1.60072	27.96	2.07624	3.23535
27.98	2.39305	1.82769	27.98	2.19266	2.99234
28	2.40205	1.8096	28	2.204	3.09447
28.02	2.48138	1.5449	28.02	2.15212	2.97748
28.04	2.54743	1.91535	28.04	2.21401	3.02333
28.06	2.6909	1.69925	28.06	2.15865	3.03802
28.08	2.69872	1.29987	28.08	2.18929	3.13795
28.1	2.6797	1.8883	28.1	2.11513	3.17463
28.12	2.54343	1.93864	28.12	2.23485	3.06603
28.14	2.6253	1.8093	28.14	2.1232	3.08392
28.16	2.53641	1.71783	28.16	2.14852	2.85599
28.18	2.42452	1.93448	28.18	2.15046	3.27409
28.2	2.53845	1.93142	28.2	2.08719	3.17839
28.22	2.59597	1.45494	28.22	2.06727	2.97337
28.24	2.61998	1.72696	28.24	2.10732	2.987
28.26	2.73867	1.66282	28.26	2.08255	3.04565
28.28	2.74181	2.181	28.28	2.02782	3.12224
28.3	2.71855	1.89698	28.3	2.0306	3.25676
28.32	2.71332	1.56805	28.32	1.89663	3.15563
28.34	2.66342	1.54512	28.34	2.02128	2.98727
28.36	2.7044	1.78695	28.36	1.96739	3.06298
28.38	2.66133	1.9438	28.38	2.08895	2.98164
28.4	2.71845	2.1653	28.4	2.08777	3.38264
28.42	2.81581	2.02901	28.42	2.06314	3.29568
28.44	2.77001	1.8307	28.44	2.01429	3.4095
28.46	2.98314	1.73462	28.46	2.06023	3.33634
28.48	2.75865	1.89489	28.48	2.06522	3.24023
28.5	2.88076	2.22573	28.5	2.12752	3.26838
28.52	2.87161	2.09823	28.52	2.08038	3.32881
28.54	2.65277	2.09919	28.54	2.08759	3.37948
28.56	2.82027	1.76958	28.56	2.10802	3.23185
28.58	2.71896	1.84411	28.58	2.07888	3.28061
28.6	2.78209	1.91992	28.6	1.9299	3.58171
28.62	2.53008	2.04559	28.62	1.97144	3.45286
28.64	2.75062	2.08014	28.64	2.05429	2.95545
28.66	2.70084	2.01793	28.66	1.97293	3.57526
28.68	2.77693	2.00044	28.68	2.11785	3.46399
28.7	2.89384	2.12729	28.7	2.05628	3.37443
28.72	2.913	2.08167	28.72	2.11277	3.50589
28.74	2.97359	2.05958	28.74	2.04313	3.4919
28.76	2.94665	2.18294	28.76	2.04074	3.46213
28.78	2.87615	2.07608	28.78	1.99954	3.27376
28.8	2.95841	1.7537	28.8	2.10936	3.49863
28.82	2.89555	1.3347	28.82	2.12773	3.47827
28.84	3.00041	1.26282	28.84	2.20763	3.34199
28.86	3.0852	1.44017	28.86	2.10812	3.55183
28.88	3.01433	2.14044	28.88	2.12342	3.17858
28.9	2.90554	1.55587	28.9	2.24301	3.33851
28.92	2.85557	1.55107	28.92	2.24194	3.27999
28.94	2.91934	1.4773	28.94	2.13595	3.0355
28.96	2.8809	1.58173	28.96	2.13967	3.28027
28.98	2.89571	1.39146	28.98	2.18585	3.24407
29	2.91649	1.50206	29	2.20082	3.26565
29.02	2.9439	1.77143	29.02	2.2004	3.47318
29.04	2.90616	1.51716	29.04	1.97274	3.18105
29.06	2.798	2.40446	29.06	2.2301	3.14666
29.08	2.82717	2.33955	29.08	2.21116	3.09227
29.1	2.82337	2.13067	29.1	2.1215	3.20675
29.12	2.93184	2.15381	29.12	2.1985	3.09689
29.14	2.83394	2.42031	29.14	2.03067	3.29174
29.16	2.90349	2.10249	29.16	2.1085	3.17981
29.18	2.98676	2.22667	29.18	2.22398	3.2061
29.2	2.87911	1.97122	29.2	2.1452	3.06319
29.22	2.80805	1.97664	29.22	2.28325	3.21552
29.24	2.80235	2.0967	29.24	2.24902	2.60674
29.26	2.89317	1.32912	29.26	2.09517	2.98879
29.28	2.86561	1.54574	29.28	2.19548	2.6764
29.3	2.91262	1.20615	29.3	2.11096	2.79919
29.32	2.93363	1.72812	29.32	2.04526	3.06785
29.34	2.9296	1.57753	29.34	2.06162	2.84862
29.36	2.87464	1.53451	29.36	2.01561	2.85361
29.38	2.88734	1.39079	29.38	1.98932	3.27209
29.4	3.00097	1.35723	29.4	1.95822	3.11466
29.42	2.96887	1.53806	29.42	1.99743	3.20061
29.44	3.02405	1.65674	29.44	1.98917	3.13136
29.46	2.98866	1.90654	29.46	2.14934	3.05365
29.48	2.92008	1.60583	29.48	2.00362	3.12739
29.5	2.95962	1.75715	29.5	2.19511	3.42147
29.52	2.97851	1.73537	29.52	2.12776	3.1175
29.54	2.96974	1.67584	29.54	2.11722	2.80856
29.56	3.09998	1.61365	29.56	2.10307	3.18866
29.58	3.13162	1.60071	29.58	2.08314	3.18248
29.6	3.10519	1.54771	29.6	2.0569	2.79066
29.62	3.00722	1.79358	29.62	1.94543	3.07745
29.64	3.08649	1.31792	29.64	2.13667	2.75049
29.66	3.16445	1.86336	29.66	2.31093	2.62404
29.68	3.04803	2.15884	29.68	2.17833	2.81759
29.7	3.14727	2.13103	29.7	2.25123	2.60351
29.72	3.04287	2.24921	29.72	2.31239	2.90955
29.74	3.05655	2.53814	29.74	2.168	2.95179
29.76	3.05431	2.24302	29.76	2.11969	2.93649
29.78	3.17167	2.66344	29.78	2.22582	2.94384
29.8	3.06642	2.34961	29.8	2.10933	2.81267
29.82	2.94437	2.53187	29.82	2.1706	2.83447
29.84	2.96903	2.57615	29.84	2.11554	2.80774
29.86	2.98404	2.36722	29.86	2.11674	2.8424
29.88	2.92962	2.18465	29.88	2.08233	2.76943
29.9	3.00171	2.1765	29.9	2.13187	2.70637
29.92	2.88849	2.28265	29.92	2.11039	2.73884
29.94	3.07495	2.20451	29.94	2.14209	2.50314
29.96	3.03698	2.13637	29.96	2.12498	2.84686
29.98	3.08852	2.21758	29.98	2.15076	2.68411
30	2.98387	2.3151	30	2.24287	2.77821
30.02	2.99193	1.9774	30.02	2.21533	2.7688
30.04	2.98143	1.60005	30.04	2.21631	2.71443
30.06	2.95348	1.50007	30.06	2.23408	2.64736
30.08	2.98525	1.59729	30.08	2.32664	2.55209
30.1	2.91969	1.82531	30.1	2.21567	3.22066
30.12	3.00384	1.43576	30.12	2.30109	3.40965
30.14	3.06536	1.33003	30.14	2.23213	3.20359
30.16	3.04709	1.32569	30.16	1.9525	3.04087
30.18	3.0826	1.48693	30.18	2.15045	3.27654
30.2	3.11073	1.49976	30.2	2.04322	3.08295
30.22	3.04845	2.27069	30.22	2.07831	2.88205
30.24	3.07259	2.16614	30.24	2.08906	3.13295
30.26	3.0464	2.139	30.26	2.09215	3.05218
30.28	3.1841	2.25831	30.28	2.02836	2.99767
30.3	3.08159	2.40791	30.3	2.05805	3.04849
30.32	3.07	2.09409	30.32	2.18746	3.16903
30.34	2.93286	2.13288	30.34	2.0069	3.2038
30.36	3.01406	2.11952	30.36	1.9952	3.09217
30.38	2.99252	1.99802	30.38	2.1517	3.19274
30.4	2.91608	2.18642	30.4	2.11464	3.50618
30.42	3.0504	2.55026	30.42	2.06112	2.97698
30.44	2.94991	2.3858	30.44	1.97351	2.99999
30.46	2.89479	2.34364	30.46	2.07049	3.00773
30.48	2.69743	2.11811	30.48	1.82332	3.269
30.5	2.55399	2.37421	30.5	1.90227	2.83625
30.52	2.69318	2.20923	30.52	1.9296	3.03865
30.54	2.70789	2.33678	30.54	1.97302	2.82814
30.56	2.663	2.02205	30.56	2.06087	2.70013
30.58	2.73539	2.16224	30.58	2.12991	2.65643
30.6	2.71462	2.21249	30.6	1.99117	2.90698
30.62	2.88137	2.10094	30.62	1.99986	2.78847
30.64	2.8767	1.713	30.64	2.21392	2.85869
30.66	2.97081	2.04623	30.66	2.10041	3.04695
30.68	2.91946	2.44373	30.68	2.05865	3.39706
30.7	2.89797	1.98235	30.7	2.24796	3.18749
30.72	2.87781	2.13212	30.72	2.11408	3.4686
30.74	2.80356	2.04076	30.74	2.2833	3.12458
30.76	2.55231	2.25362	30.76	1.96033	2.94502
30.78	2.42289	2.02668	30.78	1.95481	3.06029
30.8	2.38901	2.11719	30.8	1.90823	2.86149
30.82	2.55419	1.66265	30.82	1.97658	2.96908
30.84	2.51296	1.67926	30.84	1.91215	2.47758
30.86	2.42021	1.65177	30.86	2.01181	2.47849
30.88	2.46005	1.57706	30.88	2.09909	2.8175
30.9	2.34878	1.4181	30.9	2.11333	3.07535
30.92	2.39076	1.61812	30.92	2.05161	2.98182
30.94	2.58179	1.41574	30.94	1.95427	2.9701
30.96	2.63583	1.3784	30.96	2.00098	3.43595
30.98	2.56248	1.25709	30.98	1.9156	3.53018
31	2.63926	1.66784	31	1.88971	3.41437
31.02	2.78849	2.04564	31.02	1.91589	3.38198
31.04	2.97488	1.09007	31.04	1.81811	3.36903
31.06	2.90937	1.18009	31.06	1.96911	3.56184
31.08	2.85345	2.14401	31.08	1.91549	3.22306
31.1	2.82914	2.2486	31.1	2.01579	3.44835
31.12	2.69193	1.90392	31.12	1.97311	3.60947
31.14	2.58637	1.84037	31.14	1.93076	3.38416
31.16	2.56962	1.792	31.16	1.97609	3.42443
31.18	2.50516	1.49169	31.18	1.8992	3.53753
31.2	2.4524	1.65065	31.2	1.9435	3.57556
31.22	2.6228	1.32345	31.22	1.93263	3.34637
31.24	2.56268	1.51399	31.24	1.98205	3.12468
31.26	2.62275	1.36741	31.26	1.98239	3.47573
31.28	2.59243	1.79029	31.28	1.943	3.65378
31.3	2.61133	1.40074	31.3	1.92874	3.40376
31.32	2.59494	1.79311	31.32	2.00215	3.5178
31.34	2.75647	1.41413	31.34	2.17507	3.36155
31.36	2.63382	1.32924	31.36	2.11164	3.39951
31.38	2.48119	1.09224	31.38	2.08185	3.42227
31.4	2.45223	0.928705	31.4	2.06672	3.31932
31.42	2.55657	0.802703	31.42	1.92139	3.25879
31.44	2.35266	1.00241	31.44	2.00189	3.35029
31.46	2.3297	1.32712	31.46	1.95394	3.28683
31.48	2.31656	1.31748	31.48	2.05442	3.1064
31.5	2.42815	1.35082	31.5	2.14682	3.30267
31.52	2.45644	0.975361	31.52	2.2303	3.43646
31.54	2.56392	1.32685	31.54	2.17964	3.46654
31.56	2.47313	1.3452	31.56	2.18482	3.40597
31.58	2.50687	1.20044	31.58	2.02252	2.85083
31.6	2.32917	1.18221	31.6	2.1278	2.82856
31.62	2.36953	1.31894	31.62	2.14787	3.24428
31.64	2.29758	1.12375	31.64	2.03289	3.23319
31.66	2.30176	1.41327	31.66	2.10869	3.07817
31.68	2.39666	1.17355	31.68	2.16833	3.14592
31.7	2.37542	0.959573	31.7	2.15837	3.14938
31.72	2.36462	1.12013	31.72	2.08812	3.22409
31.74	2.31704	0.935989	31.74	2.02716	3.17775
31.76	2.43348	0.797711	31.76	2.09454	2.95214
31.78	2.49516	1.02326	31.78	2.07867	2.97126
31.8	2.53971	0.861979	31.8	2.07175	3.09753
31.82	2.38223	1.24556	31.82	2.02208	2.85507
31.84	2.3724	0.816844	31.84	2.13069	2.62212
31.86	2.58554	1.40758	31.86	2.10362	2.76555
31.88	2.56187	1.25147	31.88	2.12976	3.01175
31.9	2.51079	1.80289	31.9	2.11064	3.07002
31.92	2.49472	1.96055	31.92	2.06085	3.06111
31.94	2.61218	1.54159	31.94	2.13808	3.03644
31.96	2.61467	1.35744	31.96	2.17751	3.01948
31.98	2.68492	1.55489	31.98	2.21967	2.93585
32	2.5329	1.50141	32	2.22805	3.00378
32.02	2.46797	1.97989	32.02	2.18835	2.89328
32.04	2.77185	1.6613	32.04	2.13681	2.53584
32.06	2.88639	1.54317	32.06	2.13111	2.54551
32.08	2.86594	0.662066	32.08	2.23662	2.68095
32.1	2.73198	1.25691	32.1	2.09316	2.47012
32.12	2.82678	1.17358	32.12	2.03441	2.99286
32.14	2.91619	1.34488	32.14	2.21529	3.20721
32.16	3.0245	1.60202	32.16	2.25606	3.00512
32.18	3.09072	1.22093	32.18	2.27242	2.5168
32.2	3.10959	1.44885	32.2	2.13169	2.52346
32.22	3.17331	1.21989	32.22	2.09293	2.55134
32.24	3.18794	1.01511	32.24	2.13135	2.62849
32.26	3.08612	0.949592	32.26	2.15582	2.60405
32.28	3.2235	1.09068	32.28	2.19986	2.57341
32.3	3.35923	1.43771	32.3	2.16521	2.91837
32.32	3.36853	1.41642	32.32	2.12959	2.82137
32.34	3.47697	1.57602	32.34	2.27371	2.96603
32.36	3.45766	1.62817	32.36	2.23277	3.01398
32.38	3.39998	1.49202	32.38	2.20349	2.98143
32.4	3.54381	1.40892	32.4	2.19055	2.95146
32.42	3.53952	1.31671	32.42	2.25416	3.04882
32.44	3.57737	1.40572	32.44	2.13875	3.06052
32.46	3.7255	1.35823	32.46	2.07938	2.5606
32.48	3.74384	1.34803	32.48	2.24898	2.38285
32.5	3.63287	1.79397	32.5	2.15722	3.00155
32.52	3.66956	1.70724	32.52	2.22472	2.80759
32.54	3.68461	1.66607	32.54	2.30607	2.94412
32.56	3.60895	1.44716	32.56	2.10939	2.87775
32.58	3.65891	1.33408	32.58	2.20795	3.05996
32.6	3.68164	1.32012	32.6	2.05427	2.90044
32.62	3.66793	1.35238	32.62	2.17904	2.80271
32.64	3.78618	1.39865	32.64	2.1038	2.98999
32.66	3.91381	1.28688	32.66	2.17978	2.93476
32.68	3.93111	1.62	32.68	2.21936	2.9182
32.7	3.81785	1.07126	32.7	2.14174	2.92874
32.72	3.83642	1.69005	32.72	2.18533	2.90286
32.74	3.82491	1.24817	32.74	2.20945	3.06297
32.76	3.82508	1.2423	32.76	2.18187	3.04492
32.78	3.75893	1.4368	32.78	2.13357	2.97594
32.8	3.64489	1.43726	32.8	2.0692	2.90896
32.82	3.69078	1.32378	32.82	2.06601	2.86479
32.84	3.7365	1.23399	32.84	2.12063	2.87021
32.86	3.79283	1.18628	32.86	2.1126	2.79107
32.88	3.93197	1.21465	32.88	2.10432	2.60312
32.9	3.77759	1.34622	32.9	2.15623	2.55989
32.92	3.84388	1.18652	32.92	2.1248	3.4514
32.94	3.80109	1.28239	32.94	2.20454	3.34919
32.96	3.65953	1.48729	32.96	2.12234	2.88052
32.98	3.61752	1.43224	32.98	2.0622	3.07597
33	3.75848	1.18138	33	2.02753	3.25781
33.02	3.65682	1.5425	33.02	2.10326	3.01276
33.04	3.60875	1.42828	33.04	2.07623	3.05459
33.06	3.55103	1.64953	33.06	1.99547	3.09177
33.08	3.5001	1.88196	33.08	1.95607	3.05981
33.1	3.46251	2.03298	33.1	2.09898	3.05
33.12	3.51292	2.55742	33.12	2.1822	3.18371
33.14	3.39667	2.62373	33.14	2.07021	3.16863
33.16	3.40477	2.44005	33.16	2.16861	3.18415
33.18	3.44943	2.43525	33.18	2.17952	3.00831
33.2	3.45023	2.19476	33.2	2.0997	3.06629
33.22	3.43651	2.32487	33.22	2.29491	3.11873
33.24	3.38361	2.37741	33.24	2.24472	3.13374
33.26	3.56663	2.58497	33.26	2.22973	3.16876
33.28	3.56303	2.22835	33.28	2.29908	3.0749
33.3	3.4708	2.39012	33.3	2.19319	3.0636
33.32	3.60157	2.08233	33.32	2.27373	3.09287
33.34	3.50966	2.2435	33.34	2.28142	3.19637
33.36	3.46504	2.09359	33.36	2.1752	3.16906
33.38	3.45022	1.96847	33.38	2.11083	3.1937
33.4	3.46591	1.81132	33.4	2.12843	3.23445
33.42	3.69002	1.97968	33.42	2.19713	3.08123
33.44	3.63365	2.04391	33.44	2.21866	3.14481
33.46	3.72877	2.04299	33.46	2.05671	3.04079
33.48	3.64323	1.9723	33.48	2.20611	3.08831
33.5	3.56654	1.82973	33.5	2.327	3.27544
33.52	3.61288	1.87061	33.52	2.14548	3.13765
33.54	3.74146	1.66236	33.54	2.05305	3.28306
33.56	3.47139	1.43007	33.56	2.15417	3.18558
33.58	3.54756	1.36332	33.58	2.1445	3.15638
33.6	3.68111	1.77132	33.6	2.09559	3.07407
33.62	3.63436	1.54891	33.62	2.22387	2.75991
33.64	3.53807	1.95393	33.64	2.22052	2.74427
33.66	3.41017	2.12137	33.66	2.3227	3.14604
33.68	3.35497	2.8696	33.68	2.17691	3.1376
33.7	3.26722	2.5516	33.7	2.2292	3.14096
33.72	3.18022	2.58169	33.72	2.0967	3.02194
33.74	3.35176	2.40018	33.74	2.06527	3.02862
33.76	3.3146	2.45023	33.76	2.21108	3.09084
33.78	3.15305	2.09879	33.78	2.14489	2.99755
33.8	3.27748	2.41588	33.8	2.26678	3.27519
33.82	3.32652	1.9246	33.82	2.17125	3.01106
33.84	3.30022	1.97564	33.84	2.21292	3.15758
33.86	3.48837	1.8814	33.86	2.18521	3.12835
33.88	3.30623	1.90403	33.88	2.25284	3.21194
33.9	3.29277	2.02286	33.9	2.09789	3.1881
33.92	3.28601	1.73041	33.92	2.06981	3.14891
33.94	3.37446	1.50248	33.94	1.9168	3.1469
33.96	3.39372	1.1358	33.96	2.06746	2.69166
33.98	3.45649	1.38845	33.98	2.01937	3.00134
34	3.65598	1.53177	34	1.98317	2.99682
34.02	3.51776	1.20925	34.02	1.98066	3.03732
34.04	3.5861	1.54625	34.04	1.96111	2.98962
34.06	3.53251	1.44139	34.06	1.98044	3.15672
34.08	3.6623	1.15226	34.08	1.96658	3.20569
34.1	3.53968	1.60316	34.1	1.9863	3.17459
34.12	3.52972	1.43875	34.12	1.96759	2.9852
34.14	3.63104	1.11452	34.14	1.98009	3.04701
34.16	3.84897	1.3857	34.16	1.93771	3.03593
34.18	3.95076	1.41005	34.18	1.92744	3.01397
34.2	3.89043	1.45599	34.2	1.95092	3.0893
34.22	3.79258	1.08702	34.22	2.24557	3.0874
34.24	3.70545	1.26614	34.24	2.26933	3.11762
34.26	3.67083	1.2304	34.26	2.23128	3.09162
34.28	3.72059	1.19151	34.28	2.19081	3.21036
34.3	3.73683	0.877424	34.3	2.17973	3.11218
34.32	3.68198	1.34601	34.32	2.09762	3.10311
34.34	3.7344	1.44069	34.34	2.07617	2.95714
34.36	3.84268	1.59131	34.36	2.15064	3.0958
34.38	3.82645	1.41297	34.38	2.04052	3.00952
34.4	3.93183	1.01368	34.4	2.05311	2.98425
34.42	4.04374	1.09913	34.42	2.12458	3.03594
34.44	3.90191	1.33303	34.44	2.18687	3.01048
34.46	4.00372	1.35222	34.46	2.19608	3.04599
34.48	4.0152	1.37068	34.48	2.03078	2.68087
34.5	4.02549	1.26417	34.5	2.14827	3.0525
34.52	4.00912	1.2744	34.52	2.09063	2.77564
34.54	3.66061	1.3536	34.54	2.05201	2.75518
34.56	3.60116	1.37185	34.56	2.08728	3.14214
34.58	3.59945	1.4397	34.58	1.98706	3.14108
34.6	3.62712	1.70552	34.6	2.05543	3.14735
34.62	3.72037	1.12694	34.62	2.08807	3.18353
34.64	3.77726	1.02229	34.64	2.12489	3.16892
34.66	3.68076	1.08392	34.66	2.18865	3.17049
34.68	3.98643	1.51959	34.68	2.10018	3.23819
34.7	3.91406	1.18323	34.7	2.12774	3.09822
34.72	3.9966	1.68532	34.72	2.16429	3.06095
34.74	4.03073	1.19221	34.74	1.96168	3.05031
34.76	3.9837	1.43367	34.76	2.02641	3.09911
34.78	4.03266	1.55326	34.78	2.06436	3.0944
34.8	4.11152	1.27443	34.8	2.13757	3.1275
34.82	4.22018	1.4786	34.82	2.23681	3.02906
34.84	4.25169	1.28259	34.84	2.16525	3.20313
34.86	4.40855	1.10651	34.86	2.08941	3.15174
34.88	4.42316	1.49753	34.88	2.18943	3.19702
34.9	4.30327	1.32313	34.9	2.10107	3.20986
34.92	4.27902	1.61939	34.92	2.11526	3.07111
34.94	4.16575	1.30844	34.94	2.14691	3.27886
34.96	4.09084	1.38419	34.96	2.15494	3.14847
34.98	4.12449	1.40227	34.98	2.21988	3.14916
35	4.0779	1.43621	35	2.06746	3.12364
35.02	4.29542	1.20865	35.02	2.01433	3.16991
35.04	4.06032	1.15212	35.04	2.12242	3.20068
35.06	4.00138	1.38509	35.06	2.12382	3.02893
35.08	4.04535	1.09359	35.08	2.17035	3.113
35.1	4.00738	1.16576	35.1	2.02159	3.06811
35.12	4.01133	1.18917	35.12	2.00898	3.11095
35.14	3.97809	0.982951	35.14	2.00924	3.11998
35.16	4.03836	1.05996	35.16	2.00849	3.09569
35.18	4.35382	0.846011	35.18	2.01772	3.17625
35.2	4.19458	0.769549	35.2	2.07719	3.15421
35.22	4.07561	1.07494	35.22	2.04045	3.13618
35.24	3.95251	1.01918	35.24	1.99557	3.13815
35.26	4.07217	1.20755	35.26	1.87986	3.04145
35.28	4.20935	1.10215	35.28	1.93768	3.09565
35.3	4.13125	1.29318	35.3	2.02161	3.08159
35.32	4.26581	1.47427	35.32	2.0359	3.15012
35.34	4.43546	1.60468	35.34	2.13232	3.1082
35.36	4.48197	1.75161	35.36	2.12173	3.10833
35.38	4.4961	1.60548	35.38	2.19099	3.00954
35.4	4.35804	1.39721	35.4	2.14188	3.1069
35.42	4.17338	1.12352	35.42	2.08686	3.13787
35.44	4.04669	1.22658	35.44	2.13899	3.04846
35.46	4.23673	1.23526	35.46	2.04258	3.29759
35.48	4.0957	1.34056	35.48	1.97161	3.06268
35.5	4.0163	1.34193	35.5	1.96286	3.20766
35.52	4.10061	1.27575	35.52	1.97488	3.04229
35.54	4.14102	1.22263	35.54	2.00783	2.98976
35.56	4.10184	1.27768	35.56	2.01418	3.03463
35.58	4.18055	1.04321	35.58	2.09451	3.17253
35.6	4.21197	1.43393	35.6	1.97332	3.03131
35.62	4.18812	1.19286	35.62	2.05903	3.19569
35.64	4.007	1.26406	35.64	2.08882	3.137
35.66	4.03403	1.71654	35.66	2.14816	3.06766
35.68	4.02699	1.2828	35.68	2.13297	3.16388
35.7	4.04462	1.62924	35.7	2.12453	3.086
35.72	4.00543	1.39051	35.72	2.13741	3.17903
35.74	3.92337	1.62422	35.74	2.14995	3.11097
35.76	3.84312	1.39897	35.76	2.22608	3.34826
35.78	4.04296	1.03066	35.78	2.06237	3.12415
35.8	4.02238	1.23522	35.8	1.93372	3.06084
35.82	4.06817	1.08009	35.82	2.06642	3.12677
35.84	4.28949	1.05854	35.84	2.02667	2.89192
35.86	4.27203	1.35219	35.86	2.069	2.75997
35.88	4.19596	1.26751	35.88	2.10103	2.6752
35.9	3.99704	1.48487	35.9	2.12026	2.34908
35.92	4.1274	1.58025	35.92	2.06429	2.13729
35.94	4.21767	1.42281	35.94	2.27887	2.43067
35.96	4.03794	1.26893	35.96	2.06226	2.42909
35.98	3.96018	1.43574	35.98	2.13416	2.73915
36	4.04568	1.40926	36	2.11342	2.97952
36.02	3.91149	1.28565	36.02	2.22966	3.04029
36.04	4.05018	1.10039	36.04	2.08201	3.32862
36.06	4.07142	0.993248	36.06	2.08698	3.06762
36.08	4.11262	1.09392	36.08	2.14038	3.47935
36.1	4.14768	1.05049	36.1	2.28607	3.33454
36.12	4.10839	1.45404	36.12	2.26968	3.49806
36.14	4.00964	1.34313	36.14	2.23039	3.11268
36.16	4.0686	1.64905	36.16	2.14422	3.44341
36.18	4.17295	1.44565	36.18	2.22229	3.40535
36.2	4.15468	1.3701	36.2	2.18303	3.1989
36.22	4.0685	1.27938	36.22	2.26822	3.07381
36.24	4.26218	1.4261	36.24	2.30586	3.10673
36.26	4.28101	1.43285	36.26	2.22456	3.31247
36.28	4.22135	1.37219	36.28	2.18821	3.2464
36.3	4.22021	1.20863	36.3	2.17365	3.26439
36.32	4.19506	1.1818	36.32	2.25611	3.10138
36.34	4.18114	1.1855	36.34	2.10708	3.07377
36.36	4.09031	1.24107	36.36	2.16315	3.54134
36.38	4.21266	1.29385	36.38	2.1342	3.5665
36.4	4.28906	1.14583	36.4	2.11641	3.67537
36.42	4.23191	1.02582	36.42	2.05105	3.3105
36.44	4.25261	0.944854	36.44	2.16637	3.35657
36.46	4.241	1.4258	36.46	2.27763	3.17998
36.48	4.32614	1.20364	36.48	2.21619	3.31785
36.5	4.24559	1.28533	36.5	2.20201	3.2375
36.52	4.3041	1.71765	36.52	2.2174	3.07696
36.54	4.32955	2.19356	36.54	2.14705	3.14399
36.56	4.40435	1.81472	36.56	2.17474	3.09121
36.58	4.4091	1.58174	36.58	2.04917	3.22169
36.6	4.30921	1.40244	36.6	2.08952	3.11814
36.62	4.50871	1.27673	36.62	2.15117	3.00029
36.64	4.46163	1.11526	36.64	2.13539	2.81371
36.66	4.38455	1.07332	36.66	2.27327	2.93199
36.68	4.40258	1.22261	36.68	2.29044	3.09255
36.7	4.38278	1.22266	36.7	2.29893	2.92177
36.72	4.30858	1.41975	36.72	2.32642	2.90284
36.74	4.41155	1.25884	36.74	2.35724	2.73003
36.76	4.4143	1.15979	36.76	2.46953	2.61739
36.78	4.42527	0.874861	36.78	2.50037	2.82777
36.8	4.32446	1.47525	36.8	2.52481	2.87643
36.82	4.33146	1.14946	36.82	2.39508	2.90261
36.84	4.32816	1.15223	36.84	2.45552	3.0114
36.86	4.46931	1.24996	36.86	2.52323	3.07273
36.88	4.35455	1.35111	36.88	2.49029	2.84904
36.9	4.53258	1.24912	36.9	2.33049	2.67408
36.92	4.26867	1.33166	36.92	2.45139	2.82705
36.94	4.34597	1.14612	36.94	2.35665	3.01487
36.96	4.28185	1.18902	36.96	2.30456	2.99001
36.98	4.43941	1.09713	36.98	2.2853	3.04929
37	4.26139	1.59339	37	2.37721	2.99148
37.02	4.30314	1.09358	37.02	2.25622	2.64912
37.04	4.22247	1.30463	37.04	2.33688	2.67997
37.06	4.41307	1.53754	37.06	2.39551	2.72324
37.08	4.29477	1.60443	37.08	2.2694	2.60497
37.1	4.38641	1.46566	37.1	2.22386	3.01618
37.12	4.40072	1.78931	37.12	2.26228	2.48971
37.14	4.15786	1.80413	37.14	2.13546	2.78231
37.16	4.16369	1.60481	37.16	2.13661	2.88807
37.18	4.1813	1.46063	37.18	1.95158	2.8859
37.2	4.16034	1.58039	37.2	2.07466	3.04727
37.22	4.19157	1.43312	37.22	2.18076	2.69327
37.24	4.14145	1.71042	37.24	2.10088	2.86393
37.26	4.08565	1.93086	37.26	2.08321	2.71418
37.28	4.13375	1.6732	37.28	2.07145	2.77063
37.3	4.02496	1.99922	37.3	2.03277	2.87588
37.32	4.15427	1.95239	37.32	2.01368	2.92138
37.34	4.13398	1.49769	37.34	1.98445	3.20568
37.36	4.12454	1.59435	37.36	2.04634	3.05462
37.38	4.09249	1.56273	37.38	1.97085	2.96453
37.4	4.12615	1.58803	37.4	2.00202	2.97182
37.42	4.16733	2.06434	37.42	2.19676	3.21581
37.44	4.22596	1.56924	37.44	2.15338	2.8293
37.46	4.16643	1.85695	37.46	2.08786	3.23764
37.48	4.23448	2.28252	37.48	2.18809	2.91893
37.5	4.29489	1.22522	37.5	2.06924	3.03044
37.52	4.39081	1.5368	37.52	2.13219	2.93845
37.54	4.26841	1.39407	37.54	2.10035	2.97134
37.56	4.11897	1.31956	37.56	2.15128	3.1616
37.58	4.10273	1.40614	37.58	2.03099	2.99643
37.6	4.15376	1.02726	37.6	2.11486	3.03767
37.62	4.08185	1.03966	37.62	2.14718	2.89107
37.64	4.10624	1.58168	37.64	2.0406	3.11615
37.66	4.07404	1.39868	37.66	2.1512	3.17667
37.68	3.96058	1.38094	37.68	2.07527	3.00973
37.7	3.95888	1.55064	37.7	2.04243	3.2744
37.72	3.97708	1.26224	37.72	2.04779	3.0808
37.74	3.94963	1.21555	37.74	2.15478	3.21522
37.76	4.01933	1.56894	37.76	2.10529	3.05549
37.78	4.00658	1.27241	37.78	2.09478	3.11686
37.8	4.01364	1.57823	37.8	2.1182	2.88064
37.82	4.03403	2.01908	37.82	2.18946	3.13746
37.84	4.07025	2.22043	37.84	2.09703	3.195
37.86	4.10715	1.93643	37.86	2.09519	3.21091
37.88	4.2246	1.7553	37.88	2.17735	3.11722
37.9	4.30307	2.15975	37.9	2.08657	3.21111
37.92	4.19853	1.92036	37.92	2.01792	3.33968
37.94	4.18235	1.96614	37.94	2.06581	3.18095
37.96	4.13044	2.11072	37.96	2.13435	3.21077
37.98	4.25704	1.68185	37.98	2.14694	3.26493
38	4.17753	1.1735	38	2.07794	3.01452
38.02	4.06655	1.62561	38.02	2.10302	2.93367
38.04	4.18152	1.28163	38.04	2.09358	3.02049
38.06	4.13291	1.21491	38.06	2.18167	3.13938
38.08	4.19171	1.29624	38.08	2.16174	3.3845
38.1	4.15138	0.999159	38.1	2.20174	3.44339
38.12	4.10385	1.13561	38.12	2.1861	3.14151
38.14	4.13646	1.22536	38.14	2.24112	3.43814
38.16	4.20848	1.3936	38.16	2.22056	3.34591
38.18	4.11492	1.51308	38.18	2.13822	3.1022
38.2	4.07988	1.49792	38.2	2.24736	3.08679
38.22	4.09448	1.35169	38.22	2.10762	3.15792
38.24	4.16361	1.46134	38.24	2.12044	3.31919
38.26	4.05848	1.00132	38.26	2.29279	3.54273
38.28	4.15961	1.01795	38.28	2.15534	3.29208
38.3	4.17449	1.17215	38.3	2.19211	3.29808
38.32	4.20159	1.46289	38.32	2.12654	3.54765
38.34	4.35825	1.6033	38.34	2.12374	3.40456
38.36	4.33455	1.60135	38.36	2.14209	3.53541
38.38	4.30574	0.751376	38.38	2.0696	3.52933
38.4	4.24443	1.18522	38.4	2.09583	3.29137
38.42	4.3611	1.55208	38.42	2.18199	3.34732
38.44	4.45255	1.61789	38.44	2.18316	3.48409
38.46	4.40313	1.77546	38.46	2.09824	3.26406
38.48	4.32159	1.53959	38.48	2.19965	3.21921
38.5	4.32932	1.63375	38.5	2.22691	3.19996
38.52	4.14606	1.6463	38.52	2.29338	3.23958
38.54	4.05878	2.04365	38.54	2.19598	3.18652
38.56	4.02864	2.2158	38.56	2.29177	3.16145
38.58	4.06606	1.93117	38.58	2.21358	2.86305
38.6	4.04462	1.8994	38.6	2.24271	3.23724
38.62	4.12305	1.59075	38.62	2.16904	3.16269
38.64	4.12969	1.79184	38.64	2.30099	2.96163
38.66	4.19711	1.82873	38.66	2.37835	2.95431
38.68	4.14473	1.64063	38.68	2.30892	3.03931
38.7	4.04759	1.87197	38.7	2.25385	3.01213
38.72	3.98304	1.5267	38.72	2.234	3.0372
38.74	4.00754	1.43585	38.74	2.17591	2.97384
38.76	3.98478	1.78911	38.76	2.04527	2.86422
38.78	4.03712	1.45948	38.78	2.18392	2.65951
38.8	4.00482	1.66853	38.8	2.05394	2.5692
38.82	3.98527	1.48211	38.82	2.11034	2.49741
38.84	4.1291	1.82998	38.84	2.31855	2.90683
38.86	4.06649	1.80983	38.86	2.18138	2.77237
38.88	4.04862	2.17159	38.88	2.32085	2.58155
38.9	4.10944	1.82548	38.9	2.2896	2.57987
38.92	4.21368	1.75029	38.92	2.20917	2.37417
38.94	4.18172	1.85112	38.94	2.28371	2.53771
38.96	3.95037	1.94976	38.96	2.28381	2.33643
38.98	4.08558	1.70573	38.98	2.20497	2.85703
39	4.05216	1.66881	39	2.3681	2.26757
39.02	4.09994	1.62131	39.02	2.31662	2.45817
39.04	4.29335	2.10984	39.04	2.27704	2.48046
39.06	4.26311	1.87755	39.06	2.30787	2.26402
39.08	4.17452	1.6774	39.08	2.37811	2.39873
39.1	4.22597	1.44602	39.1	2.36244	2.54949
39.12	4.20513	1.73779	39.12	2.34954	2.55872
39.14	4.1057	1.91114	39.14	2.27864	2.73953
39.16	4.01011	1.68308	39.16	2.21657	3.05011
39.18	3.96682	1.69057	39.18	2.359	2.96692
39.2	3.74792	1.92229	39.2	2.25089	2.93766
39.22	3.91663	2.16302	39.22	2.26208	2.92137
39.24	4.04382	2.01703	39.24	2.26746	2.67448
39.26	4.07414	1.86861	39.26	2.25683	2.8668
39.28	4.07801	2.03833	39.28	2.14309	2.99988
39.3	4.08756	1.99947	39.3	2.03959	2.99966
39.32	4.01053	2.19722	39.32	2.24582	2.7724
39.34	4.16304	2.30158	39.34	2.19324	3.34989
39.36	4.12499	2.31237	39.36	2.10802	3.28487
39.38	4.08409	1.72064	39.38	2.2381	2.94109
39.4	4.01981	1.35508	39.4	2.23154	3.21332
39.42	4.12595	1.38973	39.42	2.26694	3.47635
39.44	4.10149	1.6109	39.44	2.36791	3.07781
39.46	4.15133	1.4484	39.46	2.28768	3.0181
39.48	4.18405	1.79987	39.48	2.31665	2.88508
39.5	4.09879	1.89736	39.5	2.30369	3.22956
39.52	4.12915	1.83201	39.52	2.27317	3.05676
39.54	4.16813	1.67553	39.54	2.35809	3.13781
39.56	4.02569	1.86036	39.56	2.27877	3.06663
39.58	4.07579	2.10469	39.58	2.20139	3.05883
39.6	4.12746	2.10471	39.6	2.34921	3.01425
39.62	4.1256	2.19794	39.62	2.3775	2.79338
39.64	4.24049	1.82941	39.64	2.3365	3.05621
39.66	3.98762	2.13646	39.66	2.46349	3.08366
39.68	3.9873	2.24971	39.68	2.46027	3.12788
39.7	4.05086	2.39287	39.7	2.44162	3.3265
39.72	3.9166	2.1943	39.72	2.33972	3.11509
39.74	3.8426	1.92968	39.74	2.26874	3.12475
39.76	3.71149	1.9593	39.76	2.19498	3.21392
39.78	3.75661	1.42419	39.78	2.1876	3.29912
39.8	3.80078	1.89188	39.8	2.22445	2.87531
39.82	3.85859	1.62697	39.82	2.19053	3.03303
39.84	3.74904	1.56905	39.84	2.26085	3.19128
39.86	3.76682	1.51518	39.86	2.3376	2.99809
39.88	3.76313	1.44384	39.88	2.32083	2.87793
39.9	3.66121	1.40327	39.9	2.30103	2.9242
39.92	3.59017	1.35506	39.92	2.13892	3.13794
39.94	3.6361	1.15148	39.94	2.28506	3.07949
39.96	3.67382	1.37764	39.96	2.22626	3.02797
39.98	3.6262	1.55789	39.98	2.26003	2.94814
[truncated: 502 more rows]

## Sheet: codeine
Time (ns)	protein_ARG1	LIG_Codeine	Time (ns)	protein_ARG2	LIG_Codeine
0.02	0.711576	0.451869	0.02	0.656939	0.475043
0.04	0.878605	0.342734	0.04	0.606375	0.67895
0.06	0.915062	0.480143	0.06	0.764524	0.571255
0.08	0.939232	0.550535	0.08	0.79189	0.81162
0.1	0.992829	0.45072	0.1	0.829644	0.263022
0.12	1.0431	0.240315	0.12	0.813602	0.569667
0.14	1.10498	0.490111	0.14	0.821171	0.749263
0.16	1.20496	0.371256	0.16	0.813032	0.726793
0.18	1.1464	0.462407	0.18	0.742738	0.580234
0.2	1.15105	0.563479	0.2	0.814422	0.60501
0.22	1.0857	0.764052	0.22	0.856532	1.0107
0.24	1.24156	0.767877	0.24	0.779476	0.971797
0.26	1.44657	0.804775	0.26	0.798839	0.884396
0.28	1.31607	0.793874	0.28	0.72521	0.802909
0.3	1.46489	0.920547	0.3	0.758551	0.89436
0.32	1.6116	0.624343	0.32	0.71875	0.550629
0.34	1.63028	0.794212	0.34	0.767437	0.579224
0.36	1.81396	0.798729	0.36	0.824367	0.537954
0.38	1.75968	0.626428	0.38	0.737922	0.605779
0.4	1.91766	0.626857	0.4	0.794577	0.932926
0.42	2.14925	0.642573	0.42	0.77835	0.80709
0.44	2.28637	0.667362	0.44	0.848152	0.781376
0.46	2.17665	0.778109	0.46	0.826282	0.750504
0.48	2.08499	0.869155	0.48	0.774361	0.867325
0.5	2.03743	0.625325	0.5	0.752898	0.910604
0.52	1.83173	0.682333	0.52	0.811944	1.00819
0.54	1.84574	0.604952	0.54	0.78432	0.938212
0.56	1.80705	0.622307	0.56	0.790606	0.410594
0.58	1.77289	0.642274	0.58	0.884732	0.690665
0.6	1.72197	0.692768	0.6	0.894691	0.711864
0.62	1.74367	0.632605	0.62	0.887786	0.45183
0.64	1.83495	0.769706	0.64	0.860725	0.63629
0.66	1.88531	0.787816	0.66	0.928478	0.40351
0.68	1.76606	0.831146	0.68	0.852607	0.816271
0.7	1.89063	0.788629	0.7	0.833109	0.78311
0.72	1.61136	0.78926	0.72	0.842834	0.926465
0.74	1.61681	0.848219	0.74	0.869287	0.733326
0.76	1.60196	0.818183	0.76	0.89871	0.868787
0.78	1.71536	0.742185	0.78	0.893879	0.550746
0.8	1.58824	0.787612	0.8	0.938096	0.44166
0.82	1.42305	0.849062	0.82	1.02412	0.730944
0.84	1.41942	0.821604	0.84	0.99661	0.799385
0.86	1.47066	0.80368	0.86	0.935508	0.637716
0.88	1.37449	0.773747	0.88	1.07024	0.645944
0.9	1.42703	0.822037	0.9	0.979222	0.956935
0.92	1.46782	0.71211	0.92	0.907789	0.813084
0.94	1.62062	0.749408	0.94	0.971107	0.811791
0.96	1.64959	0.730594	0.96	0.999837	0.786858
0.98	1.73115	0.699001	0.98	1.07447	0.691909
1	1.58645	0.740193	1	1.02485	0.657875
1.02	1.68083	0.615453	1.02	0.987072	0.635138
1.04	1.45128	0.663995	1.04	0.898191	0.62484
1.06	1.60939	0.692114	1.06	0.97314	0.838046
1.08	1.74053	0.525141	1.08	0.96051	0.690109
1.1	1.55738	0.616935	1.1	0.993209	0.518768
1.12	1.60896	0.694939	1.12	0.992592	0.737719
1.14	1.42657	0.607729	1.14	0.986524	0.751812
1.16	1.57013	0.654546	1.16	1.08899	0.583813
1.18	1.47737	0.845668	1.18	1.00877	0.623082
1.2	1.65253	0.779567	1.2	1.01586	0.584281
1.22	1.63889	0.781163	1.22	1.01993	0.949032
1.24	1.72919	0.742263	1.24	0.968569	0.907381
1.26	1.85262	0.76654	1.26	1.05412	0.915221
1.28	2.06803	0.778307	1.28	0.989906	0.906382
1.3	2.0384	0.787126	1.3	1.03677	0.714201
1.32	2.01607	0.823895	1.32	1.09153	0.620516
1.34	1.92091	0.747353	1.34	1.09587	0.528232
1.36	2.10539	0.768046	1.36	1.0798	0.378983
1.38	2.09376	0.784711	1.38	1.1556	0.575452
1.4	2.19059	0.73094	1.4	1.18388	0.572006
1.42	2.11739	0.756262	1.42	1.07011	0.51542
1.44	2.21106	0.780816	1.44	1.1411	0.76929
1.46	2.35451	0.696789	1.46	1.07191	0.978409
1.48	2.14392	0.747249	1.48	1.16032	0.623303
1.5	2.23798	0.776637	1.5	1.16985	0.878844
1.52	2.50391	0.743906	1.52	1.08179	0.937383
1.54	2.38955	0.722427	1.54	1.132	0.923203
1.56	2.16633	0.775875	1.56	1.14661	0.688544
1.58	2.17619	0.798462	1.58	1.0957	0.974557
1.6	2.19601	0.568828	1.6	1.09793	1.11198
1.62	2.31882	0.567337	1.62	1.1015	1.00474
1.64	2.43749	0.735597	1.64	1.05356	1.02593
1.66	2.43631	0.768778	1.66	1.07322	0.900316
1.68	2.42076	0.755114	1.68	1.0908	0.817241
1.7	2.45594	0.730504	1.7	1.0542	0.970253
1.72	2.2378	0.805687	1.72	1.10717	0.970258
1.74	2.48836	0.792844	1.74	1.09259	0.979021
1.76	2.47172	0.738102	1.76	1.08628	0.798853
1.78	2.54092	0.61995	1.78	1.04261	0.816081
1.8	2.44864	0.555055	1.8	1.13129	0.95096
1.82	2.47551	0.601372	1.82	1.21047	0.945249
1.84	2.35749	0.588183	1.84	1.1069	1.0123
1.86	2.57417	0.641418	1.86	1.08033	1.07794
1.88	2.21237	0.648148	1.88	1.14888	0.940402
1.9	2.17462	0.65153	1.9	1.13847	0.688209
1.92	2.18202	0.713301	1.92	1.04101	0.564504
1.94	2.32966	0.766044	1.94	1.09474	0.71884
1.96	2.44574	0.779897	1.96	1.10395	0.857708
1.98	2.24443	0.696887	1.98	1.13966	0.634723
2	2.25098	0.740804	2	1.2449	0.69805
2.02	2.26381	0.726731	2.02	1.16004	0.626893
2.04	2.1971	0.788318	2.04	1.13112	0.948626
2.06	2.03047	0.640529	2.06	1.09134	0.915762
2.08	2.18227	0.602588	2.08	1.11164	1.00492
2.1	2.34775	0.565562	2.1	1.10325	0.903362
2.12	1.92105	0.628955	2.12	1.18896	0.947316
2.14	1.707	0.821143	2.14	1.10784	0.997822
2.16	1.77766	0.723629	2.16	1.18495	0.954457
2.18	1.88241	0.765434	2.18	1.1886	0.37272
2.2	1.90683	0.745933	2.2	1.19091	0.654828
2.22	1.91415	0.75701	2.22	1.2048	0.531565
2.24	1.91701	0.721576	2.24	1.20529	0.750669
2.26	1.88316	0.810478	2.26	1.30179	0.894798
2.28	2.06453	0.7428	2.28	1.31058	0.970325
2.3	2.10429	0.654361	2.3	1.31565	0.913134
2.32	1.99039	0.670068	2.32	1.25664	0.682307
2.34	1.90049	0.626762	2.34	1.20927	0.82749
2.36	1.90679	0.791601	2.36	1.2245	0.826911
2.38	1.9255	0.645857	2.38	1.22371	0.769157
2.4	2.13364	0.764485	2.4	1.19669	0.844706
2.42	1.9689	0.774056	2.42	1.20917	0.878985
2.44	2.21006	0.772382	2.44	1.24379	0.890464
2.46	2.1388	0.725143	2.46	1.2997	0.916559
2.48	2.33299	0.775715	2.48	1.1923	0.742498
2.5	2.35836	0.804774	2.5	1.25603	0.580007
2.52	2.50713	0.768813	2.52	1.35483	0.791351
2.54	2.34299	0.797975	2.54	1.32717	0.526134
2.56	2.56812	0.568117	2.56	1.33932	0.681685
2.58	2.55862	0.645259	2.58	1.31917	0.61007
2.6	2.67652	0.607311	2.6	1.36585	0.453373
2.62	2.40663	0.825738	2.62	1.40505	0.53332
2.64	2.59398	0.676648	2.64	1.31795	0.597067
2.66	2.44991	0.753356	2.66	1.39653	0.62579
2.68	2.33159	0.571883	2.68	1.4078	0.811367
2.7	2.32259	0.809575	2.7	1.58269	0.71041
2.72	2.2677	0.703858	2.72	1.52397	0.592881
2.74	2.33947	0.623823	2.74	1.60742	0.759095
2.76	2.22549	0.755373	2.76	1.53387	0.86116
2.78	2.19546	0.738928	2.78	1.55433	1.1203
2.8	2.22852	0.7257	2.8	1.52116	0.843291
2.82	2.05863	0.774773	2.82	1.49594	1.02826
2.84	2.09646	0.642359	2.84	1.50685	0.887813
2.86	2.1902	0.544438	2.86	1.48115	0.917285
2.88	2.12672	0.541085	2.88	1.46793	0.964041
2.9	2.3072	0.676732	2.9	1.48237	0.729594
2.92	2.3712	0.838019	2.92	1.56478	0.693277
2.94	2.38894	0.69736	2.94	1.58283	0.894816
2.96	2.14408	0.722698	2.96	1.63081	0.841754
2.98	2.25297	0.777818	2.98	1.71608	0.849328
3	2.32481	0.752326	3	1.60246	0.786319
3.02	2.41728	0.746682	3.02	1.61531	0.862236
3.04	2.57468	0.749693	3.04	1.58099	0.727142
3.06	2.36312	0.729462	3.06	1.63272	0.806171
3.08	2.37941	0.796937	3.08	1.62426	0.764601
3.1	2.45474	0.789493	3.1	1.55871	0.772514
3.12	2.60818	0.775834	3.12	1.59423	0.895936
3.14	2.63075	0.899895	3.14	1.54505	0.897912
3.16	2.43225	0.870925	3.16	1.59761	0.755811
3.18	2.2827	0.819134	3.18	1.67699	0.483734
3.2	2.31694	0.722731	3.2	1.65984	0.859684
3.22	2.24737	0.821852	3.22	1.67102	0.641811
3.24	2.09712	0.858883	3.24	1.71182	0.52013
3.26	2.07388	0.651007	3.26	1.75593	0.631676
3.28	2.04577	0.804829	3.28	1.64623	0.813628
3.3	1.99966	0.723572	3.3	1.64398	0.902584
3.32	1.96963	0.714454	3.32	1.64491	0.784031
3.34	2.02049	0.766143	3.34	1.60325	0.906009
3.36	1.95277	0.757163	3.36	1.56094	0.881571
3.38	1.99318	0.730681	3.38	1.66215	0.850566
3.4	2.27089	0.834604	3.4	1.68584	0.877762
3.42	2.27193	0.845833	3.42	1.71236	0.920868
3.44	2.3825	0.878781	3.44	1.59088	0.922567
3.46	2.32137	0.800989	3.46	1.5917	0.967377
3.48	2.43266	0.821217	3.48	1.67592	0.961772
3.5	2.34705	0.803692	3.5	1.67346	0.946759
3.52	2.2206	0.853342	3.52	1.70498	0.952303
3.54	2.27049	0.849738	3.54	1.7702	0.90953
3.56	2.07693	0.860101	3.56	1.82357	0.898726
3.58	2.11759	0.814004	3.58	1.71415	0.790164
3.6	2.30945	0.778198	3.6	1.84695	0.963733
3.62	2.35392	0.819931	3.62	1.84485	0.8864
3.64	2.39523	0.775244	3.64	1.74913	0.618151
3.66	2.40855	0.879724	3.66	1.81051	0.696792
3.68	2.58155	0.98975	3.68	1.78725	0.859932
3.7	2.51771	0.856491	3.7	1.74378	0.565682
3.72	2.55681	1.07552	3.72	1.6625	0.490724
3.74	2.47284	0.837838	3.74	1.81304	0.519095
3.76	2.58119	0.741019	3.76	1.68374	0.590286
3.78	2.59868	0.829856	3.78	1.78253	1.004
3.8	2.35447	0.734966	3.8	1.72606	0.805954
3.82	2.31602	0.707774	3.82	1.80482	0.853957
3.84	2.40889	0.893541	3.84	1.73004	0.988221
3.86	2.58076	0.961837	3.86	1.62863	0.771232
3.88	2.42086	0.875978	3.88	1.73978	0.495792
3.9	2.47893	0.851879	3.9	1.68775	0.662188
3.92	2.42709	0.796015	3.92	1.73659	0.907665
3.94	2.40454	0.672935	3.94	1.6868	0.708743
3.96	2.31651	0.885621	3.96	1.80889	0.619847
3.98	2.42058	0.617599	3.98	1.65012	0.677436
4	2.32301	0.837206	4	1.69249	0.540147
4.02	2.25894	0.837678	4.02	1.62339	0.718562
4.04	2.52006	0.748309	4.04	1.59176	0.859058
4.06	2.53167	0.701075	4.06	1.54321	0.891288
4.08	2.5843	0.829335	4.08	1.58567	0.838116
4.1	2.54507	0.842638	4.1	1.49645	1.08037
4.12	2.66954	0.848823	4.12	1.57743	0.7083
4.14	2.60987	0.803538	4.14	1.66963	0.617409
4.16	2.67999	0.915531	4.16	1.5208	0.924318
4.18	2.87628	1.042	4.18	1.52075	0.963647
4.2	2.83286	1.01466	4.2	1.51755	0.871442
4.22	2.73701	0.758208	4.22	1.52006	0.747887
4.24	2.60543	0.855159	4.24	1.67566	0.964198
4.26	2.41304	1.08289	4.26	1.63624	0.698661
4.28	2.35295	1.12357	4.28	1.60075	0.853096
4.3	2.42908	1.2346	4.3	1.64102	0.846478
4.32	2.39189	1.13749	4.32	1.58052	0.976071
4.34	2.22738	1.06169	4.34	1.7621	0.741661
4.36	2.31355	1.0093	4.36	1.69392	0.969211
4.38	2.46777	0.737513	4.38	1.56012	0.833729
4.4	2.36034	1.12211	4.4	1.55266	0.805679
4.42	2.20074	1.0519	4.42	1.51913	1.02325
4.44	2.26515	1.04626	4.44	1.66306	0.751431
4.46	2.20525	0.849174	4.46	1.67815	0.557321
4.48	2.44119	1.14407	4.48	1.67645	0.856841
4.5	2.44704	1.06184	4.5	1.6197	1.01061
4.52	2.58274	0.780612	4.52	1.6424	0.907089
4.54	2.52764	0.828497	4.54	1.704	0.912271
4.56	2.55904	1.08293	4.56	1.71535	0.938151
4.58	2.6335	0.858061	4.58	1.57927	0.924563
4.6	2.49002	0.781701	4.6	1.68664	0.91113
4.62	2.53337	0.880469	4.62	1.63398	0.957906
4.64	2.55695	1.09444	4.64	1.73382	0.776794
4.66	2.31588	0.972187	4.66	1.61602	0.920713
4.68	2.10036	0.739833	4.68	1.76561	0.920494
4.7	2.19512	1.05803	4.7	1.74402	0.971911
4.72	2.15509	0.847941	4.72	1.82198	0.933477
4.74	2.19267	1.06097	4.74	1.75982	0.911785
4.76	2.27535	0.975593	4.76	1.67404	0.926286
4.78	2.22968	0.986926	4.78	1.75828	0.800954
4.8	2.26837	1.09737	4.8	1.74321	0.870717
4.82	2.35563	0.681863	4.82	1.69147	0.942927
4.84	2.17094	1.08554	4.84	1.66745	1.02645
4.86	2.27472	0.74579	4.86	1.6482	0.702995
4.88	2.17635	0.709678	4.88	1.63258	0.519885
4.9	2.40066	0.964765	4.9	1.5825	0.612544
4.92	2.30773	1.06975	4.92	1.69781	0.61522
4.94	2.34013	0.776917	4.94	1.60069	1.04767
4.96	2.50981	0.878401	4.96	1.6227	0.891427
4.98	2.46722	0.862817	4.98	1.60649	0.865717
5	2.43999	0.745838	5	1.67165	1.01197
5.02	2.38958	1.03183	5.02	1.74362	0.835138
5.04	2.52489	1.16395	5.04	1.71644	0.940367
5.06	2.51678	0.793747	5.06	1.66933	0.950044
5.08	2.35246	0.884487	5.08	1.68602	0.929797
5.1	2.31706	0.859067	5.1	1.74714	0.921089
5.12	2.19941	0.819838	5.12	1.70238	0.913272
5.14	2.31628	0.731126	5.14	1.67156	0.957668
5.16	2.42347	0.788694	5.16	1.81181	0.41469
5.18	2.15996	1.08146	5.18	1.65005	0.571937
5.2	2.30809	1.0315	5.2	1.54924	0.414557
5.22	2.1317	0.852336	5.22	1.60613	0.766341
5.24	2.44207	1.05948	5.24	1.7012	0.529479
5.26	2.17474	1.03733	5.26	1.62649	0.652335
5.28	2.2359	1.04997	5.28	1.50274	0.972391
5.3	2.43481	1.06354	5.3	1.68333	0.872845
5.32	2.3718	1.05883	5.32	1.63419	0.838853
5.34	2.65256	1.14541	5.34	1.65478	0.662773
5.36	2.6181	1.0465	5.36	1.67446	0.809949
5.38	2.67818	1.10168	5.38	1.81763	0.99844
5.4	2.88817	0.687697	5.4	1.59046	0.877001
5.42	2.73323	0.687269	5.42	1.66143	0.851208
5.44	2.7972	0.805226	5.44	1.5882	1.01065
5.46	2.79667	0.827617	5.46	1.64676	1.01612
5.48	2.63254	0.63749	5.48	1.62069	0.790155
5.5	2.55644	0.863576	5.5	1.70623	0.965659
5.52	2.58561	0.906951	5.52	1.66562	0.863561
5.54	2.70433	0.751237	5.54	1.67392	0.960816
5.56	2.57917	1.06936	5.56	1.82732	0.874209
5.58	2.72157	1.17155	5.58	1.69275	0.963452
5.6	2.61092	1.08089	5.6	1.70597	0.82407
5.62	2.62373	1.02857	5.62	1.60777	0.840843
5.64	2.52139	0.9518	5.64	1.69033	1.02485
5.66	2.57207	0.925883	5.66	1.7563	1.01494
5.68	2.72149	0.966416	5.68	1.8271	1.01061
5.7	2.72042	0.678176	5.7	1.7134	0.9269
5.72	2.87383	0.875559	5.72	1.73925	0.83018
5.74	2.74065	0.757178	5.74	1.84863	0.92415
5.76	2.58542	0.449003	5.76	1.70153	0.915237
5.78	2.58889	0.623319	5.78	1.78205	0.923168
5.8	2.72423	0.660832	5.8	1.77873	0.916933
5.82	2.78163	0.934007	5.82	1.85452	0.833646
5.84	2.71581	0.98913	5.84	1.72851	0.877363
5.86	2.82147	0.973404	5.86	1.71928	0.830635
5.88	2.69492	0.976856	5.88	1.80593	0.887559
5.9	2.58663	0.921958	5.9	1.73102	0.729519
5.92	2.59671	0.955941	5.92	1.71969	0.992634
5.94	2.35481	0.65282	5.94	1.73121	0.891959
5.96	2.51379	0.504155	5.96	1.76242	0.855439
5.98	2.51482	0.922697	5.98	1.68175	1.01309
6	2.34279	0.898965	6	1.76289	0.835469
6.02	2.50241	0.903685	6.02	1.74031	0.757487
6.04	2.32804	0.542871	6.04	1.88493	0.742484
6.06	2.29387	0.61173	6.06	1.77036	0.859396
6.08	2.38064	0.790277	6.08	1.75294	0.964521
6.1	2.38137	0.425629	6.1	1.69489	0.864534
6.12	2.29461	0.458864	6.12	1.6416	1.12263
6.14	2.22948	0.924227	6.14	1.66085	0.936194
6.16	2.26132	0.925435	6.16	1.70747	0.999383
6.18	2.22824	0.581517	6.18	1.67334	0.928765
6.2	2.10075	0.472305	6.2	1.68443	0.850013
6.22	2.25709	0.667356	6.22	1.67667	0.914617
6.24	2.21651	0.773103	6.24	1.66316	0.986101
6.26	2.3297	0.510085	6.26	1.65004	0.8622
6.28	2.45112	0.652911	6.28	1.65838	0.83151
6.3	2.29752	0.460376	6.3	1.60639	0.963668
6.32	2.23406	0.700011	6.32	1.61921	0.778287
6.34	2.27771	0.456073	6.34	1.65321	0.937224
6.36	2.26662	0.605074	6.36	1.72819	0.926655
6.38	2.11434	0.981118	6.38	1.72512	0.828219
6.4	2.20093	1.07932	6.4	1.63809	0.898992
6.42	2.20034	0.928482	6.42	1.6991	0.868958
6.44	2.14796	0.560513	6.44	1.78637	0.835048
6.46	2.16098	0.966451	6.46	1.81528	0.882595
6.48	2.2739	0.549242	6.48	1.97671	0.846778
6.5	2.23456	0.926402	6.5	1.77757	0.98876
6.52	2.27055	0.898322	6.52	1.77213	1.09951
6.54	2.18901	0.990146	6.54	1.8909	0.485736
6.56	2.21597	0.950281	6.56	1.68804	0.835872
6.58	2.32693	1.03498	6.58	1.71119	0.930659
6.6	2.29531	0.873643	6.6	1.63486	0.972161
6.62	2.4594	0.965489	6.62	1.63602	0.914785
6.64	2.60998	0.877127	6.64	1.58026	0.909436
6.66	2.52261	0.862257	6.66	1.69098	1.07333
6.68	2.54621	0.985141	6.68	1.72308	0.869549
6.7	2.44422	0.91067	6.7	1.72766	0.919951
6.72	2.42992	0.92148	6.72	1.73648	0.683701
6.74	2.29023	0.71584	6.74	1.69622	0.668785
6.76	2.2571	0.925908	6.76	1.72413	0.602093
6.78	2.1679	0.947229	6.78	1.72621	0.562984
6.8	2.1942	0.9008	6.8	1.75864	0.611535
6.82	2.30108	0.898726	6.82	1.67254	0.502626
6.84	2.19913	0.968546	6.84	1.75812	0.712483
6.86	2.25562	0.980495	6.86	1.74018	0.450868
6.88	2.20823	0.912897	6.88	1.64352	0.718393
6.9	2.1592	0.980001	6.9	1.67919	0.597034
6.92	2.24063	0.957044	6.92	1.70646	0.564808
6.94	2.01058	1.00333	6.94	1.72311	0.763407
6.96	2.05067	0.90867	6.96	1.76928	0.781018
6.98	2.06907	0.895828	6.98	1.78042	0.321149
7	2.2499	0.882832	7	1.78549	0.667591
7.02	2.19439	0.960851	7.02	1.7915	0.59982
7.04	2.2719	0.956309	7.04	1.87405	0.956566
7.06	2.21539	0.473023	7.06	1.8626	0.936959
7.08	2.42219	0.75226	7.08	1.71525	0.90092
7.1	2.18253	0.577699	7.1	1.80234	0.96595
7.12	2.30619	0.699063	7.12	1.74657	0.896074
7.14	2.25154	0.670318	7.14	1.73141	0.844106
7.16	2.36914	0.705266	7.16	1.71019	0.8027
7.18	2.35258	0.622278	7.18	1.82293	0.79662
7.2	2.36553	0.663346	7.2	1.84618	0.889716
7.22	2.40139	0.600434	7.22	1.84258	0.851359
7.24	2.33657	0.831817	7.24	1.78725	0.888746
7.26	2.26871	0.944662	7.26	1.74878	0.866288
7.28	2.20938	0.911582	7.28	1.67262	0.716156
7.3	2.22635	0.823345	7.3	1.67731	0.907741
7.32	2.34823	0.870502	7.32	1.74516	0.913932
7.34	2.33972	0.887871	7.34	1.77916	0.771239
7.36	2.27256	0.998556	7.36	1.66523	0.803016
7.38	2.07216	0.975119	7.38	1.80522	0.540764
7.4	2.19752	0.973912	7.4	1.78209	0.868691
7.42	2.02622	0.991951	7.42	1.67332	0.726268
7.44	2.13546	0.908342	7.44	1.94225	0.725209
7.46	2.05356	0.974988	7.46	1.76024	0.65774
7.48	2.1189	0.609074	7.48	1.77332	0.90607
7.5	2.13446	0.782686	7.5	1.71626	0.631069
7.52	2.08373	0.692788	7.52	1.82266	0.539639
7.54	2.24878	0.768366	7.54	1.68777	0.57652
7.56	2.26555	0.926544	7.56	1.65943	0.826914
7.58	2.15391	1.04674	7.58	1.759	0.979459
7.6	2.09889	0.915151	7.6	1.76331	0.886733
7.62	2.24873	0.9811	7.62	1.70218	0.916585
7.64	2.23228	0.779153	7.64	1.64506	0.871258
7.66	2.29884	0.480384	7.66	1.76043	0.657548
7.68	2.37978	0.996892	7.68	1.6769	0.851979
7.7	2.43626	0.894918	7.7	1.69809	0.806329
7.72	2.54175	0.67989	7.72	1.66601	0.868264
7.74	2.61889	1.03275	7.74	1.68107	1.06671
7.76	2.58147	0.949894	7.76	1.69003	0.639736
7.78	2.50281	0.89627	7.78	1.67494	0.777565
7.8	2.45101	0.924344	7.8	1.77372	0.783817
7.82	2.49278	1.11611	7.82	1.64012	0.732746
7.84	2.60864	0.918259	7.84	1.76321	0.432716
7.86	2.92232	0.932843	7.86	1.64614	0.415073
7.88	2.9854	0.974804	7.88	1.80788	0.583252
7.9	2.92101	0.643647	7.9	1.80001	1.00999
7.92	2.77867	0.671309	7.92	1.7093	0.623511
7.94	2.61869	0.676927	7.94	1.69188	0.461064
7.96	2.41909	0.723468	7.96	1.61302	0.743864
7.98	2.48329	0.924008	7.98	1.67139	0.860539
8	2.35856	0.871425	8	1.79073	0.87158
8.02	2.45833	0.982906	8.02	1.71095	0.869396
8.04	2.46577	0.48164	8.04	1.70407	0.885236
8.06	2.33122	0.821363	8.06	1.6542	0.945268
8.08	2.34177	0.682738	8.08	1.66301	0.914943
8.1	2.29138	0.5139	8.1	1.62437	0.987392
8.12	2.20674	0.712301	8.12	1.66932	1.02211
8.14	2.12531	0.69136	8.14	1.76767	0.716594
8.16	2.13441	0.983997	8.16	1.71207	0.259253
8.18	2.05267	0.755108	8.18	1.73223	0.893691
8.2	2.14089	0.558364	8.2	1.80714	0.94319
8.22	2.07831	0.957123	8.22	1.86716	0.987035
8.24	2.08622	0.907035	8.24	1.6475	0.880867
8.26	2.22962	1.0127	8.26	1.65414	1.0212
8.28	2.2545	0.872092	8.28	1.65464	0.8413
8.3	2.37463	0.462444	8.3	1.79591	0.888473
8.32	2.32263	0.671571	8.32	1.77635	0.960784
8.34	2.27237	0.672614	8.34	1.8029	0.898055
8.36	2.2308	0.6071	8.36	1.7756	0.841474
8.38	2.23247	0.879264	8.38	1.97972	0.706666
8.4	2.20497	0.514374	8.4	1.95033	0.899057
8.42	2.33176	0.446542	8.42	1.9121	0.97192
8.44	2.21091	0.694356	8.44	1.79514	0.859579
8.46	2.28179	0.662489	8.46	1.81691	0.910953
8.48	2.29555	0.958154	8.48	1.88955	0.896688
8.5	2.19617	0.957908	8.5	1.91725	0.975802
8.52	2.1928	0.984542	8.52	1.88913	0.934332
8.54	2.25994	0.968123	8.54	1.87343	0.96696
8.56	2.29588	0.698874	8.56	1.91872	0.87562
8.58	2.32896	0.617292	8.58	1.90468	0.860773
8.6	2.15088	0.710138	8.6	1.99049	0.836529
8.62	2.04828	0.972451	8.62	1.74282	0.893017
8.64	2.22015	0.931821	8.64	1.84902	0.887384
8.66	2.23171	0.620739	8.66	1.80395	0.911068
8.68	2.18958	0.593241	8.68	1.83601	1.10122
8.7	2.22684	0.915658	8.7	1.84815	0.920145
8.72	2.24928	0.898239	8.72	1.76622	0.916898
8.74	2.27773	0.963502	8.74	1.8067	0.794216
8.76	2.28654	1.00337	8.76	1.75033	0.694175
8.78	2.29217	0.872525	8.78	1.78705	0.821896
8.8	2.26384	0.934425	8.8	1.86547	0.953596
8.82	2.19722	0.979008	8.82	1.80446	0.81245
8.84	2.34124	0.959369	8.84	1.76847	0.9072
8.86	2.52553	1.01244	8.86	1.80499	0.666626
8.88	2.51902	0.914233	8.88	1.87576	0.836749
8.9	2.38089	0.934451	8.9	1.95032	0.884016
8.92	2.58554	0.848801	8.92	1.87464	0.972651
8.94	2.67211	0.785778	8.94	1.97236	0.466779
8.96	2.77872	0.650919	8.96	1.85101	0.898218
8.98	2.68984	0.646496	8.98	1.7377	0.860251
9	2.87031	0.953504	9	1.84651	0.955534
9.02	2.77264	0.92603	9.02	1.80988	0.925503
9.04	2.68054	0.969579	9.04	1.84633	0.865098
9.06	2.76211	1.00327	9.06	1.883	0.780032
9.08	2.59761	0.94152	9.08	1.83916	0.802865
9.1	2.63916	0.974021	9.1	1.9151	0.856549
9.12	2.48751	0.937495	9.12	1.86578	0.948917
9.14	2.4668	0.936344	9.14	1.92614	0.882288
9.16	2.66243	0.725316	9.16	1.8125	0.843501
9.18	2.51456	0.73753	9.18	1.83706	0.863966
9.2	2.66138	0.904895	9.2	1.77408	0.938764
9.22	2.54655	0.460209	9.22	1.75347	0.914518
9.24	2.60249	0.632373	9.24	1.83146	0.880241
9.26	2.57369	0.834657	9.26	1.90415	0.509622
9.28	2.54873	0.718955	9.28	1.83469	1.00966
9.3	2.5232	0.955982	9.3	1.81973	1.02088
9.32	2.34609	1.05296	9.32	1.80467	0.692307
9.34	2.50093	1.01478	9.34	1.77181	0.710227
9.36	2.45008	0.952264	9.36	1.80573	0.593878
9.38	2.38495	0.89597	9.38	1.76159	0.603742
9.4	2.44443	0.571953	9.4	1.79692	0.657871
9.42	2.56553	0.872655	9.42	1.76568	0.939118
9.44	2.53455	0.767388	9.44	1.75831	0.981637
9.46	2.55049	0.731036	9.46	1.75021	0.923095
9.48	2.72029	0.998067	9.48	1.72708	0.922401
9.5	2.80556	0.827872	9.5	1.82441	0.941031
9.52	2.60293	0.793645	9.52	1.73037	1.00993
9.54	2.62227	0.987977	9.54	1.70317	0.862752
9.56	2.65077	0.915239	9.56	1.78887	0.914294
9.58	2.61777	0.618808	9.58	1.77819	0.846677
9.6	2.73373	0.708175	9.6	1.7534	0.836286
9.62	2.48341	0.951591	9.62	1.68243	0.979865
9.64	2.51014	1.10022	9.64	1.72502	0.910347
9.66	2.58384	0.945859	9.66	1.73961	1.07937
9.68	2.55696	0.971138	9.68	1.69896	0.911514
9.7	2.35083	1.01832	9.7	1.69237	0.808012
9.72	2.41434	0.927348	9.72	1.75223	0.896438
9.74	2.34866	0.882355	9.74	1.88449	0.645143
9.76	2.37383	0.663989	9.76	1.64726	0.97382
9.78	2.25538	0.684004	9.78	1.73962	0.802499
9.8	2.36967	0.599882	9.8	1.73895	0.859709
9.82	2.3803	0.729667	9.82	1.75694	0.954363
9.84	2.22506	0.610503	9.84	1.75684	0.883614
9.86	2.30266	0.403782	9.86	1.76816	0.946845
9.88	2.24982	0.51131	9.88	1.7109	0.929567
9.9	2.33421	1.07197	9.9	1.69918	1.03105
9.92	2.40484	0.743974	9.92	1.79755	0.889812
9.94	2.27945	0.765295	9.94	1.78205	0.956443
9.96	2.3307	0.890179	9.96	1.80182	0.915971
9.98	2.30944	1.04221	9.98	1.71683	1.00606
10	2.20454	0.900731	10	1.66875	0.923051
10.02	2.26478	1.02551	10.02	1.72187	0.913393
10.04	2.21132	0.436263	10.04	1.64874	0.916007
10.06	2.30095	0.529454	10.06	1.7528	0.913223
10.08	2.24356	0.632793	10.08	1.83757	0.960289
10.1	2.24665	0.468	10.1	1.81278	1.05649
10.12	2.30697	0.655163	10.12	1.76491	0.920518
10.14	2.52958	0.575786	10.14	1.78076	1.03424
10.16	2.36247	0.933288	10.16	1.79711	0.930919
10.18	2.4125	0.651707	10.18	1.84477	0.614337
10.2	2.40141	0.455889	10.2	1.76971	0.812115
10.22	2.45809	0.842234	10.22	1.76421	0.609789
10.24	2.42151	0.95001	10.24	1.79553	0.797676
10.26	2.35511	1.02521	10.26	1.83109	0.8114
10.28	2.3294	0.985916	10.28	1.72968	1.02445
10.3	2.32037	0.996062	10.3	1.77904	1.02242
10.32	2.27821	0.600561	10.32	1.78147	0.926394
10.34	2.30927	0.93423	10.34	1.74203	0.66274
10.36	2.20997	1.00079	10.36	1.77304	0.9745
10.38	2.31827	0.861032	10.38	1.75218	0.964292
10.4	2.22918	0.988455	10.4	1.78128	0.32842
10.42	2.15285	0.752904	10.42	1.76585	1.0091
10.44	2.18798	0.530088	10.44	1.72256	0.872471
10.46	2.25944	0.942589	10.46	1.72138	1.08717
10.48	2.19287	1.06793	10.48	1.67326	0.728504
10.5	2.22892	0.94519	10.5	1.72287	0.574398
10.52	2.24847	1.03989	10.52	1.71108	0.48563
10.54	2.3406	0.793728	10.54	1.69383	0.344308
10.56	2.27655	0.787729	10.56	1.77273	0.856558
10.58	2.25654	1.01563	10.58	1.7675	0.464395
10.6	2.44343	1.00237	10.6	1.7093	0.451948
10.62	2.36257	0.914304	10.62	1.70911	0.728486
10.64	2.40927	0.957748	10.64	1.64544	0.865974
10.66	2.51564	0.938651	10.66	1.68061	0.84035
10.68	2.45994	0.955204	10.68	1.7548	0.886636
10.7	2.40699	1.00446	10.7	1.71695	0.617563
10.72	2.36144	0.961734	10.72	1.70519	0.600421
10.74	2.26684	0.496248	10.74	1.56322	0.902779
10.76	2.43087	0.831879	10.76	1.6739	0.638704
10.78	2.42486	0.378617	10.78	1.67093	0.980986
10.8	2.45572	0.495181	10.8	1.68482	0.738692
10.82	2.53226	0.487774	10.82	1.6648	0.944678
10.84	2.56114	1.01893	10.84	1.59097	0.834806
10.86	2.63043	0.99235	10.86	1.74458	0.986313
10.88	2.72969	0.573514	10.88	1.70902	0.735385
10.9	2.56836	0.577345	10.9	1.59872	0.876563
10.92	2.55588	0.694921	10.92	1.6584	0.988647
10.94	2.57855	0.691516	10.94	1.59687	0.857683
10.96	2.47068	0.561398	10.96	1.72109	0.843576
10.98	2.49762	0.655694	10.98	1.7518	0.877934
11	2.52579	0.94319	11	1.71936	0.844007
11.02	2.55173	0.35588	11.02	1.679	0.966448
11.04	2.57155	0.704782	11.04	1.67278	0.86928
11.06	2.46526	0.84652	11.06	1.73737	0.660619
11.08	2.43433	1.0697	11.08	1.64308	0.930781
11.1	2.29493	0.799549	11.1	1.73572	1.04165
11.12	2.28441	0.705731	11.12	1.66748	0.88314
11.14	2.28757	0.742851	11.14	1.70861	0.814034
11.16	2.30721	0.997466	11.16	1.69637	0.929368
11.18	2.14002	0.97882	11.18	1.70017	0.933401
11.2	2.40704	0.951851	11.2	1.69268	0.772099
11.22	2.3114	0.853015	11.22	1.80429	0.842971
11.24	2.2165	0.785228	11.24	1.83873	0.86858
11.26	2.14006	0.866823	11.26	1.77727	0.956941
11.28	2.07007	0.471888	11.28	1.79188	0.80709
11.3	2.08287	0.35295	11.3	1.80709	0.857794
11.32	2.21031	0.652579	11.32	1.81298	0.657826
11.34	2.24117	0.979302	11.34	1.82531	0.968404
11.36	2.20996	0.87188	11.36	1.76576	0.858185
11.38	2.23776	0.936093	11.38	1.72313	0.906516
11.4	2.13411	0.954515	11.4	1.77963	1.00589
11.42	2.17926	0.701102	11.42	1.73049	0.939491
11.44	2.15253	0.609151	11.44	1.82814	0.953127
11.46	2.26193	0.500003	11.46	1.7768	0.700206
11.48	2.3146	0.60847	11.48	1.7381	0.55151
11.5	2.28589	0.888282	11.5	1.72384	0.681926
11.52	2.31029	0.866006	11.52	1.7797	0.849279
11.54	2.32473	0.902077	11.54	1.85061	0.909438
11.56	2.41694	0.863409	11.56	1.82414	0.688315
11.58	2.54381	0.922143	11.58	1.9292	0.76986
11.6	2.49545	0.63256	11.6	1.81244	0.821198
11.62	2.31015	0.50313	11.62	1.78066	0.870202
11.64	2.36787	0.997197	11.64	1.7904	0.884127
11.66	2.39856	0.910594	11.66	1.79393	0.873618
11.68	2.52415	0.880857	11.68	1.81074	0.876685
11.7	2.72548	0.855152	11.7	1.88217	1.0229
11.72	2.67727	0.948885	11.72	1.85037	1.01644
11.74	2.66363	0.950529	11.74	1.86113	0.888066
11.76	2.83269	0.798024	11.76	1.80906	0.888302
11.78	2.74198	0.683743	11.78	1.7202	0.937427
11.8	2.5647	0.717684	11.8	1.77291	0.90031
11.82	2.73518	0.598936	11.82	1.71529	0.850812
11.84	2.56937	0.465051	11.84	1.77298	0.868118
11.86	2.55613	0.661493	11.86	1.8616	0.801163
11.88	2.35851	0.519645	11.88	1.90321	0.927021
11.9	2.40728	0.58845	11.9	1.91718	0.967731
11.92	2.61834	0.935618	11.92	1.87066	0.865702
11.94	2.56825	0.868191	11.94	1.9446	1.02325
11.96	2.39283	0.516419	11.96	1.83981	0.859684
11.98	2.41073	0.484825	11.98	1.89971	0.854633
12	2.3723	0.88598	12	1.77975	0.980457
12.02	2.28426	0.963732	12.02	1.76836	0.976874
12.04	2.37906	0.902802	12.04	1.75385	0.921261
12.06	2.3485	0.571787	12.06	1.67857	0.682614
12.08	2.383	0.904782	12.08	1.66507	0.427539
12.1	2.4273	1.00254	12.1	1.63666	0.890549
12.12	2.22311	0.946321	12.12	1.71709	0.783261
12.14	2.37945	0.947568	12.14	1.7202	0.968469
12.16	2.33095	0.974336	12.16	1.63716	0.989888
12.18	2.42272	0.969292	12.18	1.6963	0.933382
12.2	2.28209	0.924401	12.2	1.65832	0.92353
12.22	2.34686	0.642917	12.22	1.66399	0.706747
12.24	2.25203	0.930048	12.24	1.70809	0.849756
12.26	2.26221	0.952512	12.26	1.7489	0.93587
12.28	2.33403	0.623964	12.28	1.75664	0.796836
12.3	2.44738	0.589123	12.3	1.66577	0.969853
12.32	2.4451	0.656068	12.32	1.69551	0.664474
12.34	2.42803	0.94673	12.34	1.53313	0.814775
12.36	2.46691	0.938027	12.36	1.64526	0.810404
12.38	2.23022	1.0107	12.38	1.65155	0.899009
12.4	2.32973	1.01143	12.4	1.69671	0.739693
12.42	2.22726	0.904485	12.42	1.63893	0.919198
12.44	2.47916	0.949577	12.44	1.57357	0.948301
12.46	2.53413	0.823522	12.46	1.67833	1.04405
12.48	2.55086	0.537802	12.48	1.79205	0.758011
12.5	2.6483	0.859903	12.5	1.67435	0.529763
12.52	2.49822	1.0208	12.52	1.66832	0.503085
12.54	2.54894	0.9161	12.54	1.67858	0.732693
12.56	2.52097	0.461667	12.56	1.71644	0.68873
12.58	2.53282	0.904761	12.58	1.66118	0.682873
12.6	2.62065	0.948239	12.6	1.74243	1.00399
12.62	2.52323	0.961419	12.62	1.69548	0.606926
12.64	2.43058	1.01284	12.64	1.66451	0.677895
12.66	2.5448	0.853217	12.66	1.7293	0.641578
12.68	2.41171	0.935765	12.68	1.74155	0.569719
12.7	2.34357	0.976457	12.7	1.70631	0.81479
12.72	2.46198	0.612832	12.72	1.66803	0.819458
12.74	2.49548	0.959012	12.74	1.65519	0.878533
12.76	2.53499	0.63341	12.76	1.70947	0.846874
12.78	2.39977	0.906179	12.78	1.78162	0.992083
12.8	2.40536	0.964797	12.8	1.6629	0.563337
12.82	2.3651	0.918255	12.82	1.71586	0.83426
12.84	2.35357	0.897876	12.84	1.71041	0.941035
12.86	2.29613	0.91132	12.86	1.70942	0.960325
12.88	2.23934	0.760766	12.88	1.72882	0.840364
12.9	2.24385	0.44761	12.9	1.72564	0.844507
12.92	2.26909	0.464665	12.92	1.64596	0.896245
12.94	2.24746	0.57593	12.94	1.70967	0.748053
12.96	2.24568	0.488484	12.96	1.67232	0.884184
12.98	1.97085	0.854208	12.98	1.59856	0.305435
13	2.20647	0.893536	13	1.69111	0.527278
13.02	2.24504	1.03413	13.02	1.71021	1.02516
13.04	2.15426	0.591741	13.04	1.80556	1.02922
13.06	2.05216	0.67796	13.06	1.77578	0.971015
13.08	2.06271	0.908271	13.08	1.78886	0.945339
13.1	2.17778	0.556211	13.1	1.74467	0.823804
13.12	2.19814	0.621313	13.12	1.74123	0.854126
13.14	2.15738	0.948883	13.14	1.74689	0.826511
13.16	2.31966	1.05284	13.16	1.80147	0.858682
13.18	2.30869	0.636462	13.18	1.75727	0.875134
13.2	2.45049	0.744069	13.2	1.82152	0.773926
13.22	2.27717	0.632986	13.22	1.74463	0.96133
13.24	2.38291	0.61319	13.24	1.65685	0.885335
13.26	2.46913	0.668655	13.26	1.68231	1.00746
13.28	2.38208	0.449919	13.28	1.71699	0.806776
13.3	2.32737	0.657789	13.3	1.77982	0.858809
13.32	2.54323	0.562031	13.32	1.86432	0.964269
13.34	2.46927	0.698169	13.34	1.81134	1.08837
13.36	2.35884	0.634278	13.36	1.82743	0.83417
13.38	2.39707	0.833028	13.38	1.81937	0.920842
13.4	2.4017	0.967486	13.4	1.81955	0.819205
13.42	2.45532	0.960509	13.42	1.74402	1.05059
13.44	2.38288	0.81994	13.44	1.66874	1.02959
13.46	2.42738	0.995481	13.46	1.65687	0.980044
13.48	2.26257	0.477992	13.48	1.67285	0.938491
13.5	2.20514	0.900622	13.5	1.77589	0.857636
13.52	2.43147	0.886458	13.52	1.58963	0.866134
13.54	2.49519	0.63809	13.54	1.69652	0.844099
13.56	2.58193	0.681207	13.56	1.69161	1.02435
13.58	2.55144	0.787123	13.58	1.67769	0.847469
13.6	2.4196	0.684832	13.6	1.69671	0.959419
13.62	2.3592	0.846344	13.62	1.74149	1.00835
13.64	2.46967	0.849105	13.64	1.65253	0.948545
13.66	2.51692	0.996938	13.66	1.63435	0.86096
13.68	2.44211	1.00914	13.68	1.65269	0.817814
13.7	2.41853	0.95038	13.7	1.77984	0.804425
13.72	2.50788	0.863881	13.72	1.73681	0.835827
13.74	2.352	0.729402	13.74	1.62816	0.959292
13.76	2.51944	0.677584	13.76	1.68429	0.965752
13.78	2.54795	0.673999	13.78	1.66416	0.882835
13.8	2.57106	0.459524	13.8	1.72102	0.981963
13.82	2.48751	1.01165	13.82	1.75421	0.858646
13.84	2.40928	1.10518	13.84	1.62585	0.849219
13.86	2.46369	1.06721	13.86	1.72711	0.605019
13.88	2.39845	0.95016	13.88	1.73492	0.70978
13.9	2.43096	0.773603	13.9	1.66654	0.41848
13.92	2.46906	0.942982	13.92	1.77034	0.513371
13.94	2.43869	0.869567	13.94	1.70543	0.652954
13.96	2.42614	1.06217	13.96	1.83066	0.666486
13.98	2.33314	0.954817	13.98	1.87412	0.781258
14	2.29681	0.980097	14	1.83658	0.917129
14.02	2.25753	1.05996	14.02	1.73121	0.997928
14.04	2.35931	0.70359	14.04	1.81618	0.927252
14.06	2.33552	0.915554	14.06	1.74014	0.90638
14.08	2.4189	0.952414	14.08	1.72051	0.943975
14.1	2.43031	0.971583	14.1	1.81228	0.886501
14.12	2.35054	0.982516	14.12	1.92878	0.943861
14.14	2.25658	0.985708	14.14	1.7788	1.03772
14.16	2.43363	0.905376	14.16	1.72969	0.750878
14.18	2.45769	0.994969	14.18	1.81129	0.974339
14.2	2.42076	0.879843	14.2	1.66562	0.944543
14.22	2.50162	0.972635	14.22	1.80037	0.86344
14.24	2.46873	1.03575	14.24	1.64115	0.846545
14.26	2.5126	0.883084	14.26	1.85074	0.880996
14.28	2.45958	1.00851	14.28	1.78134	0.81657
14.3	2.47288	0.932017	14.3	1.77374	0.907434
14.32	2.54548	0.502219	14.32	1.84229	0.851552
14.34	2.56518	0.937022	14.34	1.67365	0.955348
14.36	2.35389	0.907614	14.36	1.65338	0.859563
14.38	2.41336	0.992349	14.38	1.80165	0.907132
14.4	2.5672	0.90276	14.4	1.8474	0.775723
14.42	2.59591	0.889846	14.42	1.70147	0.837506
14.44	2.60482	0.893731	14.44	1.72526	0.863372
14.46	2.87607	0.842836	14.46	1.73231	1.04976
14.48	2.98194	0.623601	14.48	1.73384	1.02263
14.5	3.12759	0.685189	14.5	1.73435	0.958554
14.52	3.16386	0.913438	14.52	1.80876	1.04477
14.54	3.25871	0.948241	14.54	1.74102	0.956715
14.56	3.13161	0.954042	14.56	1.80682	0.950358
14.58	3.14354	0.971271	14.58	1.81498	0.883363
14.6	3.18974	0.990848	14.6	1.72334	0.86694
14.62	3.28235	0.955756	14.62	1.7145	0.917264
14.64	3.23277	0.966471	14.64	1.67644	0.757963
14.66	3.4021	0.919954	14.66	1.75921	0.850386
14.68	3.1839	0.946886	14.68	1.70136	0.948025
14.7	3.30541	0.955712	14.7	1.73009	0.865343
14.72	3.26315	0.876543	14.72	1.72498	0.911398
14.74	3.2547	0.868955	14.74	1.75351	0.880366
14.76	3.28427	0.605081	14.76	1.73119	0.903447
14.78	3.28491	0.721969	14.78	1.76958	0.937821
14.8	3.31147	0.927714	14.8	1.70285	0.82561
14.82	3.22594	0.933172	14.82	1.83632	0.959598
14.84	3.20146	0.910295	14.84	1.69738	0.789046
14.86	3.27487	0.933767	14.86	1.60214	0.989983
14.88	3.22829	0.926969	14.88	1.78271	0.75887
14.9	3.22791	0.871386	14.9	1.72788	0.988001
14.92	3.15189	0.948997	14.92	1.90038	1.07722
14.94	3.28408	0.578555	14.94	1.82486	0.901361
14.96	3.07126	0.604604	14.96	1.7611	0.894774
14.98	3.26696	0.684261	14.98	1.77088	1.0281
15	3.14002	0.736336	15	1.71412	0.883382
15.02	3.15585	0.516165	15.02	1.76745	1.0451
15.04	3.0129	0.934766	15.04	1.7893	0.873848
15.06	2.94007	1.03085	15.06	1.84391	0.865832
15.08	2.98904	0.80375	15.08	1.8165	0.868996
15.1	2.9043	0.870282	15.1	1.81201	0.930601
15.12	3.04346	0.648306	15.12	1.69646	0.9863
15.14	3.00487	0.669247	15.14	1.67053	0.953906
15.16	3.26073	0.464007	15.16	1.84082	0.888767
15.18	3.07389	0.727636	15.18	1.83075	0.986342
15.2	3.27047	0.946842	15.2	1.81249	0.975005
15.22	3.298	0.937374	15.22	1.7757	0.90512
15.24	3.27468	0.430951	15.24	1.75561	0.965742
15.26	3.32374	0.762524	15.26	1.75985	1.00419
15.28	3.3845	0.979533	15.28	1.75979	0.912453
15.3	3.31668	0.995073	15.3	1.75538	0.84434
15.32	3.23031	0.915699	15.32	1.78655	0.998323
15.34	3.3771	0.794187	15.34	1.72951	0.967246
15.36	3.47165	0.721144	15.36	1.70313	1.01434
15.38	3.44738	0.877192	15.38	1.6604	0.959497
15.4	3.60412	0.984007	15.4	1.73784	1.04317
15.42	3.65991	0.495618	15.42	1.68601	0.813119
15.44	3.56019	0.652143	15.44	1.65356	0.940093
15.46	3.58757	0.893589	15.46	1.65878	0.855158
15.48	3.39844	0.897427	15.48	1.74678	1.07769
15.5	3.61916	0.991995	15.5	1.72678	0.949627
15.52	3.5138	1.00016	15.52	1.75264	0.848206
15.54	3.63677	0.722279	15.54	1.77771	0.95721
15.56	3.79157	0.819569	15.56	1.80701	0.947137
15.58	3.6754	0.939657	15.58	1.78373	0.805025
15.6	3.56588	0.954197	15.6	1.73573	0.909935
15.62	3.77498	0.908595	15.62	1.77496	0.913806
15.64	3.61814	0.583862	15.64	1.73745	0.868417
15.66	3.68694	0.666789	15.66	1.76059	1.00287
15.68	3.80592	0.673696	15.68	1.77322	0.887921
15.7	3.8551	0.953692	15.7	1.71122	1.03224
15.72	3.88306	0.759349	15.72	1.64876	0.909447
15.74	4.11568	0.579473	15.74	1.74312	0.966428
15.76	4.06413	0.542923	15.76	1.71371	1.0341
15.78	4.29863	0.64513	15.78	1.72277	0.924447
15.8	4.2234	0.869003	15.8	1.72213	0.943967
15.82	4.22808	0.902446	15.82	1.65665	0.851858
15.84	4.10375	0.963315	15.84	1.80405	1.01604
15.86	4.15952	0.709268	15.86	1.78563	0.842619
15.88	4.26322	0.782582	15.88	1.6852	0.939614
15.9	4.29032	0.783563	15.9	1.74981	0.899497
15.92	4.03869	0.709637	15.92	1.71067	0.910241
15.94	4.11224	0.399606	15.94	1.72396	0.778516
15.96	4.17805	0.880628	15.96	1.74223	0.871306
15.98	4.08086	0.909139	15.98	1.77233	0.871116
16	4.13426	0.472032	16	1.74952	0.846422
16.02	4.25754	0.757856	16.02	1.59305	1.0409
16.04	3.93603	0.930026	16.04	1.75221	0.902359
16.06	4.14752	0.538746	16.06	1.68996	0.959169
16.08	4.00488	0.90893	16.08	1.80516	0.940217
16.1	4.39376	0.898189	16.1	1.72095	0.883315
16.12	4.49393	0.972004	16.12	1.88414	0.903721
16.14	4.39896	0.69799	16.14	1.94098	0.947422
16.16	4.45737	0.698408	16.16	1.8646	0.901248
16.18	4.48729	0.625701	16.18	1.8334	0.889266
16.2	4.44108	0.704638	16.2	1.82732	1.00876
16.22	4.20792	0.56599	16.22	1.82559	0.890442
16.24	4.2979	0.685254	16.24	1.77382	1.00364
16.26	4.3916	0.873754	16.26	1.71076	0.856795
16.28	4.43605	0.901186	16.28	1.73037	0.875234
16.3	4.54566	0.981237	16.3	1.69219	0.977351
16.32	4.80337	0.684302	16.32	1.75691	0.980729
16.34	4.94566	0.855097	16.34	1.87391	0.946692
16.36	4.98392	0.852224	16.36	1.76948	0.854774
16.38	5.00318	0.919932	16.38	1.75477	0.732554
16.4	4.98187	0.881327	16.4	1.74429	0.855068
16.42	4.94383	0.655008	16.42	1.71938	0.881353
16.44	5.21241	0.692779	16.44	1.75796	1.02212
16.46	5.31487	1.01878	16.46	1.70507	0.877672
16.48	5.22727	0.429668	16.48	1.7862	0.908502
16.5	5.46608	0.914198	16.5	1.73274	0.844191
16.52	5.31316	0.808376	16.52	1.76622	0.891829
16.54	5.22806	0.99936	16.54	1.7282	0.850099
16.56	5.05219	0.809201	16.56	1.73086	0.857848
16.58	4.95755	1.02171	16.58	1.71416	0.799863
16.6	4.78536	1.00797	16.6	1.64867	0.821683
16.62	4.77277	0.976685	16.62	1.73796	0.823485
16.64	4.69199	0.937307	16.64	1.78104	0.85926
16.66	4.75066	0.999353	16.66	1.75316	0.922311
16.68	4.61259	0.985221	16.68	1.69896	0.981183
16.7	4.71802	0.837378	16.7	1.65848	0.992044
16.72	4.82767	0.680212	16.72	1.75607	1.07291
16.74	4.69473	0.603148	16.74	1.67311	0.825629
16.76	4.74974	0.580553	16.76	1.70608	0.965201
16.78	4.61897	0.656921	16.78	1.73067	0.939624
16.8	4.82571	0.548613	16.8	1.57343	0.892813
16.82	4.94025	0.66376	16.82	1.73057	0.856134
16.84	4.74107	0.520919	16.84	1.67852	0.948954
16.86	4.71529	0.538083	16.86	1.64716	0.85652
16.88	4.85738	0.70328	16.88	1.74755	0.901436
16.9	4.74939	0.890332	16.9	1.76086	0.987479
16.92	4.69309	0.909382	16.92	1.68462	1.02575
16.94	4.67921	0.901599	16.94	1.66491	0.987438
16.96	4.92288	0.923871	16.96	1.74032	0.862736
16.98	4.75902	0.849142	16.98	1.81698	0.874848
17	4.68896	0.922831	17	1.70044	0.756297
17.02	4.55864	0.895773	17.02	1.69455	0.905118
17.04	4.41752	1.038	17.04	1.71198	0.871778
17.06	4.26367	1.06946	17.06	1.70782	0.952944
17.08	4.2646	0.996039	17.08	1.75071	0.930696
17.1	4.32127	0.891273	17.1	1.70102	0.905379
17.12	4.39863	0.998576	17.12	1.70992	0.998018
17.14	4.51954	1.06756	17.14	1.8712	0.914439
17.16	4.74952	0.856786	17.16	1.72446	0.843707
17.18	4.59172	1.01421	17.18	1.72513	0.823256
17.2	4.56278	0.82156	17.2	1.61603	0.927976
17.22	4.6651	0.674523	17.22	1.66195	0.899655
17.24	4.55769	0.808295	17.24	1.62771	0.969177
17.26	4.51382	0.977947	17.26	1.5994	0.84656
17.28	4.91901	0.944589	17.28	1.61739	1.03576
17.3	4.88411	0.956806	17.3	1.75041	0.909471
17.32	4.80339	0.766613	17.32	1.71686	0.874518
17.34	4.72354	0.682803	17.34	1.8745	0.912368
17.36	4.59931	0.954143	17.36	1.73563	0.925115
17.38	4.72743	0.926605	17.38	1.81898	0.797199
17.4	4.88373	0.920385	17.4	1.76994	0.934976
17.42	4.7459	0.510797	17.42	1.72651	0.90293
17.44	4.66699	0.690297	17.44	1.71814	0.864715
17.46	4.55973	0.770141	17.46	1.78503	0.890286
17.48	4.4308	0.903976	17.48	1.76436	0.856646
17.5	4.39	0.949613	17.5	1.76434	0.897912
17.52	4.28571	0.934914	17.52	1.80836	0.982113
17.54	4.4042	0.856478	17.54	1.78164	0.949682
17.56	4.18675	0.899426	17.56	1.70926	0.907761
17.58	4.15188	0.929331	17.58	1.75813	0.921539
17.6	4.33715	0.961702	17.6	1.74595	0.916913
17.62	4.23203	0.892868	17.62	1.80463	0.931379
17.64	4.16402	1.05449	17.64	1.7869	1.00213
17.66	4.20215	0.540648	17.66	1.79285	0.928146
17.68	4.28836	0.726797	17.68	1.81758	0.864312
17.7	4.44043	0.708888	17.7	1.85535	0.860636
17.72	4.7049	0.711201	17.72	1.99022	0.914044
17.74	4.58321	0.937562	17.74	1.85028	0.911138
17.76	4.69459	0.900761	17.76	1.76997	0.907369
17.78	4.70679	0.565509	17.78	1.78311	0.801044
17.8	4.79369	0.692452	17.8	1.80459	1.02136
17.82	4.94375	0.628912	17.82	1.78221	0.932006
17.84	4.75014	0.544962	17.84	1.80996	0.982422
17.86	4.61665	0.598233	17.86	1.71561	0.953073
17.88	4.75601	0.641353	17.88	1.78201	0.942478
17.9	4.65445	0.729812	17.9	1.74755	1.00781
17.92	4.7186	0.679754	17.92	1.73614	0.796153
17.94	4.57328	0.638769	17.94	1.71807	1.00174
17.96	4.5766	0.985203	17.96	1.71753	0.943814
17.98	4.27691	0.985814	17.98	1.7489	0.91476
18	4.31704	1.03528	18	1.7448	0.869583
18.02	4.36929	0.71426	18.02	1.67724	0.990476
18.04	4.45804	0.939741	18.04	1.74896	0.933472
18.06	4.51671	0.839294	18.06	1.69673	0.908335
18.08	4.50332	0.652838	18.08	1.65058	0.936071
18.1	4.34313	0.456851	18.1	1.67863	0.976046
18.12	4.3174	0.711095	18.12	1.71509	0.882987
18.14	4.32523	0.760818	18.14	1.77961	0.884647
18.16	4.28587	0.882631	18.16	1.72968	0.904326
18.18	4.16382	0.946615	18.18	1.73791	0.778306
18.2	4.11201	0.945417	18.2	1.72936	0.950646
18.22	4.25976	0.910357	18.22	1.70217	0.931577
18.24	4.39036	0.914115	18.24	1.74964	0.899659
18.26	4.30307	0.951051	18.26	1.74386	1.02109
18.28	4.40699	0.89069	18.28	1.84411	1.03045
18.3	4.40294	0.859312	18.3	1.73543	0.974259
18.32	4.33231	0.925912	18.32	1.73664	0.954363
18.34	4.45311	0.963657	18.34	1.72553	0.857159
18.36	4.70043	0.641551	18.36	1.64553	0.897918
18.38	4.79249	0.497849	18.38	1.68526	1.02925
18.4	4.95027	0.581874	18.4	1.79291	0.902457
18.42	4.90674	0.964271	18.42	1.66512	0.938191
18.44	4.87125	0.999954	18.44	1.71836	0.882616
18.46	4.95611	0.94993	18.46	1.68592	0.942964
18.48	5.14404	0.999892	18.48	1.74547	0.964037
18.5	5.23819	0.950024	18.5	1.73974	0.977602
18.52	5.07627	0.942404	18.52	1.79633	1.05532
18.54	5.01364	0.978644	18.54	1.84746	1.00626
18.56	5.18677	0.655163	18.56	1.91059	0.902082
18.58	4.92276	1.081	18.58	1.83553	0.854242
18.6	4.77358	0.840159	18.6	1.75409	0.949041
18.62	4.99323	1.00836	18.62	1.78903	0.895757
18.64	4.81801	0.845638	18.64	1.86118	0.73657
18.66	4.84017	0.871795	18.66	1.78	0.979346
18.68	4.75461	0.983866	18.68	1.80752	0.836373
18.7	4.82131	1.04505	18.7	1.74225	0.927878
18.72	4.85538	1.06782	18.72	1.68881	0.904567
18.74	4.88869	0.975491	18.74	1.71497	0.868617
18.76	4.80352	0.663998	18.76	1.74289	0.996013
18.78	4.84631	0.613828	18.78	1.77856	0.887919
18.8	4.65729	0.848332	18.8	1.81011	1.00459
18.82	4.68562	0.830003	18.82	1.74533	0.981971
18.84	4.85777	0.962301	18.84	1.84207	0.93871
18.86	4.76133	0.527564	18.86	1.82924	0.887748
18.88	4.82428	0.964477	18.88	1.78481	0.89264
18.9	4.89803	0.880521	18.9	1.72454	0.843418
18.92	4.76692	0.849868	18.92	1.69153	0.99337
18.94	4.71749	1.04427	18.94	1.74798	0.928633
18.96	4.67301	0.858143	18.96	1.65507	0.832809
18.98	4.70182	0.868383	18.98	1.67893	0.929525
19	4.7039	0.845932	19	1.72395	0.917888
19.02	4.32759	0.924279	19.02	1.64306	0.926444
19.04	4.48051	0.471378	19.04	1.59263	0.880337
19.06	4.3809	0.749572	19.06	1.63513	0.932664
19.08	4.38561	1.01705	19.08	1.73223	0.897493
19.1	4.39438	0.870271	19.1	1.77039	0.950181
19.12	4.31404	0.77125	19.12	1.73382	0.908791
19.14	4.20902	0.949828	19.14	1.69016	0.937129
19.16	4.33432	0.927224	19.16	1.58438	0.896366
19.18	4.50766	0.986321	19.18	1.63168	0.951298
19.2	4.44564	0.974983	19.2	1.72999	0.922366
19.22	4.25126	1.09422	19.22	1.64115	0.927481
19.24	4.07434	0.804777	19.24	1.69242	0.984417
19.26	4.05447	0.953056	19.26	1.75597	0.924575
19.28	3.81158	0.99337	19.28	1.60767	0.865866
19.3	3.7849	0.572776	19.3	1.66266	1.00619
19.32	3.71552	0.893445	19.32	1.62802	0.993731
19.34	3.86199	0.909927	19.34	1.69243	0.977972
19.36	3.82516	0.629	19.36	1.63314	0.964388
19.38	3.7814	0.671284	19.38	1.65061	0.774892
19.4	3.85086	0.834811	19.4	1.61342	0.960028
19.42	3.65542	0.924173	19.42	1.63601	0.920331
19.44	3.87672	0.949146	19.44	1.72648	0.906349
19.46	3.97853	0.889776	19.46	1.68947	0.847695
19.48	3.93894	0.885026	19.48	1.648	0.888157
19.5	3.81306	1.02463	19.5	1.71511	0.90335
19.52	3.83045	0.933458	19.52	1.78363	0.980064
19.54	3.93975	0.983881	19.54	1.72483	0.924207
19.56	3.96044	0.91649	19.56	1.72477	0.842053
19.58	3.95333	0.968218	19.58	1.796	0.950878
19.6	3.77174	0.734275	19.6	1.76908	0.916619
19.62	3.43881	0.948011	19.62	1.7889	0.902212
19.64	3.47144	0.912743	19.64	1.76104	0.870837
19.66	3.26915	0.6955	19.66	1.72705	0.874588
19.68	3.31818	0.607124	19.68	1.7949	0.784069
19.7	3.50253	0.563342	19.7	1.72648	0.820917
19.72	3.53142	0.649692	19.72	1.72796	0.936759
19.74	3.65708	0.38981	19.74	1.79336	0.902319
19.76	3.64707	0.513596	19.76	1.81769	0.895481
19.78	3.70144	0.515205	19.78	1.77748	0.848062
19.8	3.58789	0.496017	19.8	1.78641	0.973756
19.82	3.66848	0.595862	19.82	1.72605	0.820525
19.84	3.84892	0.923683	19.84	1.74553	0.906191
19.86	3.56635	0.998648	19.86	1.75541	0.829068
19.88	3.74319	0.635952	19.88	1.7086	0.9183
19.9	3.68914	0.958905	19.9	1.82263	0.874208
19.92	3.79395	0.809237	19.92	1.84781	0.880625
19.94	3.7353	0.541257	19.94	1.75553	0.880947
19.96	3.58532	0.995044	19.96	1.72978	0.783783
19.98	3.40112	0.926073	19.98	1.79007	0.942921
20	3.44057	0.969153	20	1.73918	0.829435
20.02	3.68159	0.725121	20.02	1.80683	0.971639
20.04	3.78626	0.7689	20.04	1.76493	0.897983
20.06	3.64708	1.05045	20.06	1.68238	0.838833
20.08	3.56032	0.857868	20.08	1.66836	0.979446
20.1	3.29828	0.606928	20.1	1.77102	0.958299
20.12	3.46053	0.959916	20.12	1.8026	0.925774
20.14	3.33745	0.822853	20.14	1.74071	0.840223
20.16	3.38743	0.963203	20.16	1.79251	0.81253
20.18	3.18255	0.539578	20.18	1.77687	0.888848
20.2	3.2836	0.566684	20.2	1.72949	0.812084
20.22	3.21398	0.810002	20.22	1.7372	0.844398
20.24	3.24199	0.625984	20.24	1.77133	0.955474
20.26	3.37848	0.682306	20.26	1.81074	0.826609
20.28	3.14981	0.57604	20.28	1.77233	0.823515
20.3	3.17701	0.616971	20.3	1.75418	0.819436
20.32	3.45262	0.920241	20.32	1.84663	0.756696
20.34	3.3651	0.906007	20.34	1.75144	1.02945
20.36	3.44122	0.956421	20.36	1.77775	0.952212
20.38	3.55551	0.798437	20.38	1.84499	0.871563
20.4	3.47869	0.916651	20.4	1.83891	0.95111
20.42	3.67165	0.868908	20.42	1.91079	0.914091
20.44	3.57534	1.05542	20.44	1.74111	0.818952
20.46	3.76489	0.927723	20.46	1.88269	0.801224
20.48	3.96509	1.00319	20.48	1.74489	1.0005
20.5	3.86705	1.00709	20.5	1.657	0.811594
20.52	3.95608	0.917539	20.52	1.76012	0.873931
20.54	3.9145	0.829332	20.54	1.79988	1.04764
20.56	3.73199	1.01112	20.56	1.67286	1.02687
20.58	3.7174	1.00657	20.58	1.82773	1.03064
20.6	3.81972	0.922587	20.6	1.80003	1.01937
20.62	3.93422	1.03209	20.62	1.86539	0.998068
20.64	4.1072	0.912985	20.64	1.83675	1.09658
20.66	4.19685	0.940156	20.66	1.87388	1.10248
20.68	4.27025	0.858921	20.68	1.81541	1.05274
20.7	4.12504	0.728715	20.7	1.73831	0.971168
20.72	4.18614	0.992439	20.72	1.7087	0.889102
20.74	4.17694	0.990997	20.74	1.6664	1.0541
20.76	4.16431	0.88297	20.76	1.63531	0.994323
20.78	4.10117	0.763333	20.78	1.73827	1.00552
20.8	4.25018	0.479013	20.8	1.66294	1.07456
20.82	4.30821	0.991333	20.82	1.74276	0.977617
20.84	4.07125	0.981514	20.84	1.7316	1.022
20.86	4.13259	0.709444	20.86	1.75397	1.12972
20.88	4.17091	0.775927	20.88	1.76658	1.11981
20.9	4.30436	0.892998	20.9	1.66798	0.922191
20.92	4.5631	0.761303	20.92	1.77583	1.08875
20.94	4.41404	1.01247	20.94	1.6855	0.890373
20.96	4.20358	0.921065	20.96	1.77839	1.03513
20.98	4.11215	0.92119	20.98	1.74585	1.00501
21	4.21317	0.899637	21	1.69096	0.987602
21.02	4.1064	0.800959	21.02	1.78958	1.12823
21.04	4.03216	0.862091	21.04	1.83955	1.0426
21.06	4.22611	0.530236	21.06	1.86545	1.23376
21.08	4.20303	0.672509	21.08	1.86001	1.05517
21.1	4.17974	0.937596	21.1	1.88612	1.03838
21.12	4.18528	0.919858	21.12	1.79114	1.13379
21.14	4.22875	0.920438	21.14	1.80416	1.15181
21.16	4.11236	0.903079	21.16	1.67919	1.04002
21.18	4.14678	0.90251	21.18	1.85051	1.05704
21.2	4.07807	0.969816	21.2	1.78092	1.04811
21.22	4.24858	0.956526	21.22	1.65814	0.892674
21.24	4.25274	0.909778	21.24	1.7502	1.10108
21.26	4.22469	0.803856	21.26	1.71458	1.06893
21.28	4.20332	1.0312	21.28	1.65542	1.01006
21.3	4.42072	1.00405	21.3	1.74751	1.03389
21.32	4.3643	0.860248	21.32	1.80306	1.01049
21.34	4.40116	0.629503	21.34	1.6977	1.05817
21.36	4.33632	0.473934	21.36	1.66346	1.0685
21.38	4.30323	0.924788	21.38	1.64429	1.1328
21.4	4.48538	1.02819	21.4	1.65823	1.10929
21.42	4.38512	0.599516	21.42	1.60802	1.02099
21.44	4.30407	0.726862	21.44	1.76221	1.02792
21.46	3.98427	0.792237	21.46	1.71376	0.995209
21.48	4.17012	0.895152	21.48	1.59356	1.01894
21.5	4.15081	0.575585	21.5	1.69764	1.06553
21.52	4.343	0.559036	21.52	1.68029	1.07392
21.54	4.26374	0.643181	21.54	1.73365	1.10722
21.56	4.44585	0.608131	21.56	1.64348	1.06569
21.58	4.21817	0.605209	21.58	1.6673	1.04858
21.6	4.12978	0.791909	21.6	1.67902	1.03046
21.62	4.08943	0.650867	21.62	1.7346	1.03772
21.64	4.26176	0.748476	21.64	1.77774	1.07406
21.66	4.19986	0.652898	21.66	1.70392	1.06369
21.68	4.08343	0.938164	21.68	1.76556	1.00842
21.7	3.90061	0.94716	21.7	1.78234	1.08589
21.72	4.39627	0.938896	21.72	1.79075	1.06913
21.74	4.23196	0.977268	21.74	1.73592	1.02482
21.76	4.0771	0.989684	21.76	1.72113	1.05132
21.78	3.96931	0.811759	21.78	1.75642	1.05155
21.8	3.93166	1.06431	21.8	1.64358	1.11042
21.82	3.80378	1.02553	21.82	1.74688	1.07937
21.84	3.889	1.10795	21.84	1.76371	0.935808
21.86	3.82163	0.680314	21.86	1.7501	1.10959
21.88	3.85542	0.78285	21.88	1.70402	0.988068
21.9	3.69348	0.628245	21.9	1.6801	0.981029
21.92	4.01861	0.793664	21.92	1.70015	0.828564
21.94	3.7986	0.776644	21.94	1.70392	0.950716
21.96	3.67174	0.992928	21.96	1.71272	0.963943
21.98	3.63362	0.348765	21.98	1.70315	1.12466
22	3.78131	0.732634	22	1.77074	0.994905
22.02	3.51163	0.915111	22.02	1.794	1.06969
22.04	3.5385	0.614181	22.04	1.81996	1.09439
22.06	3.73949	0.95976	22.06	1.7512	0.853765
22.08	3.77091	0.968149	22.08	1.78606	0.857285
22.1	3.90408	0.940542	22.1	1.77557	0.969764
22.12	3.9966	1.00637	22.12	1.80163	1.02755
22.14	3.93163	0.948022	22.14	1.76695	0.68972
22.16	3.9761	0.883258	22.16	1.78441	1.09964
22.18	4.10926	0.817137	22.18	1.83343	0.680918
22.2	4.17068	1.08071	22.2	1.71364	0.854444
22.22	4.14433	0.939742	22.22	1.79493	0.981224
22.24	4.19155	0.844759	22.24	1.88202	1.07703
22.26	4.48169	0.922849	22.26	1.91962	1.06421
22.28	4.3089	0.489845	22.28	1.80534	0.748011
22.3	4.25881	0.987228	22.3	1.74127	0.915859
22.32	4.36648	0.991363	22.32	1.76897	0.721343
22.34	4.25334	0.937075	22.34	1.78038	0.916512
22.36	4.29891	0.632533	22.36	1.89734	0.944096
22.38	4.46308	0.531864	22.38	1.81052	1.04288
22.4	4.64976	0.802611	22.4	1.8852	1.01041
22.42	4.42314	1.02963	22.42	1.72584	0.842863
22.44	4.50726	0.700961	22.44	1.68855	0.949454
22.46	4.59194	0.641591	22.46	1.7794	0.992468
22.48	4.67019	0.700683	22.48	1.85094	1.02075
22.5	4.50768	0.632618	22.5	1.91159	1.06829
22.52	4.52014	0.609192	22.52	1.76337	1.06888
22.54	4.46173	0.640115	22.54	1.78947	0.970217
22.56	4.37602	0.590859	22.56	1.79617	1.00027
22.58	4.38227	0.551208	22.58	1.86914	1.10963
22.6	4.50698	0.445536	22.6	1.80161	1.01294
22.62	4.63719	0.679662	22.62	1.72835	1.06755
22.64	4.72677	0.659577	22.64	1.73596	0.888731
22.66	4.85343	1.01321	22.66	1.78656	1.03529
22.68	4.88943	0.979966	22.68	1.78968	0.885485
22.7	4.82145	0.994023	22.7	1.76025	0.924285
22.72	4.89971	0.906472	22.72	1.66825	0.854257
22.74	4.98722	1.03107	22.74	1.78296	0.73821
22.76	4.91559	0.872408	22.76	1.7729	0.800138
22.78	5.1079	0.951461	22.78	1.75242	1.09914
22.8	5.16252	1.00998	22.8	1.70733	0.930366
22.82	5.51706	0.959853	22.82	1.75915	1.02104
22.84	5.14553	0.447173	22.84	1.80243	1.0051
22.86	5.44153	0.68568	22.86	1.64241	0.990274
22.88	5.40479	0.973062	22.88	1.75804	0.985063
22.9	5.32492	0.936799	22.9	1.61358	1.02954
22.92	5.22725	0.772259	22.92	1.61527	1.06563
22.94	5.49342	0.484787	22.94	1.6542	0.773175
22.96	5.12514	0.425423	22.96	1.65421	0.793121
22.98	5.08357	0.523335	22.98	1.73764	0.842679
23	5.06471	0.979471	23	1.737	0.780381
23.02	5.02655	0.9698	23.02	1.73005	0.651811
23.04	5.0111	1.03364	23.04	1.74353	0.761456
23.06	5.25725	0.836862	23.06	1.69961	0.805213
23.08	5.08861	0.624268	23.08	1.78463	0.965538
23.1	5.15373	0.979292	23.1	1.70275	0.892899
23.12	5.23246	0.705097	23.12	1.73343	0.625535
23.14	5.24934	0.933083	23.14	1.74554	0.730653
23.16	5.28326	0.811513	23.16	1.80678	0.969755
23.18	5.15833	0.700852	23.18	1.7879	0.879611
23.2	5.11882	0.762741	23.2	1.86131	0.82995
23.22	5.22017	0.70251	23.22	1.84082	0.72698
23.24	5.14925	0.982364	23.24	1.76269	0.870938
23.26	5.12306	0.930219	23.26	1.71442	0.84893
23.28	5.16888	0.475185	23.28	1.7647	1.13773
23.3	5.19261	0.68448	23.3	1.83692	0.966232
23.32	5.23239	0.954697	23.32	1.8036	1.03134
23.34	5.30615	0.730735	23.34	1.88653	0.752853
23.36	5.41857	0.661414	23.36	1.81714	1.11694
23.38	5.67124	0.878935	23.38	1.7477	1.00358
23.4	5.3524	0.979888	23.4	1.80459	1.0576
23.42	5.31691	0.812304	23.42	1.71968	1.03442
23.44	5.2513	0.969531	23.44	1.69049	1.06368
23.46	5.32244	0.774505	23.46	1.75244	1.13689
23.48	5.40033	0.708562	23.48	1.69727	1.0737
23.5	5.38469	0.762585	23.5	1.72533	0.616328
23.52	5.37554	0.894415	23.52	1.75769	1.00402
23.54	5.34184	0.914055	23.54	1.76563	0.814833
23.56	5.44685	0.500898	23.56	1.68511	1.06692
23.58	5.30665	0.590768	23.58	1.74719	1.00845
23.6	5.19514	0.520826	23.6	1.76433	0.917036
23.62	5.02198	0.646361	23.62	1.73381	0.994295
23.64	5.07675	0.610263	23.64	1.73223	0.783593
23.66	5.14803	0.750267	23.66	1.75986	1.01439
23.68	5.08245	0.702729	23.68	1.67442	0.9578
23.7	5.04745	0.674216	23.7	1.7716	1.0405
23.72	5.11571	0.66612	23.72	1.76663	1.02992
23.74	4.97916	0.421986	23.74	1.69079	1.008
23.76	5.03981	0.679506	23.76	1.63749	1.1049
23.78	4.88696	0.556887	23.78	1.62984	1.00255
23.8	4.99163	1.02932	23.8	1.63498	1.0615
23.82	4.91887	0.991685	23.82	1.68426	0.763209
23.84	4.85459	0.879729	23.84	1.71111	0.938644
23.86	4.86556	0.8728	23.86	1.74461	1.03493
23.88	4.97239	0.712142	23.88	1.69115	0.70347
23.9	4.90309	0.578692	23.9	1.6485	0.73979
23.92	5.03677	0.788872	23.92	1.64319	1.16664
23.94	5.06755	0.728239	23.94	1.61893	0.638081
23.96	5.12175	1.02281	23.96	1.63347	1.11796
23.98	5.06548	0.964038	23.98	1.61028	0.998109
24	4.9716	1.04805	24	1.70735	1.00937
24.02	5.10601	0.886752	24.02	1.68594	1.11889
24.04	5.11438	0.868778	24.04	1.66427	1.07991
24.06	5.02253	0.964192	24.06	1.58917	1.05244
24.08	4.83156	1.06187	24.08	1.66822	0.996936
24.1	4.9583	0.968471	24.1	1.66621	1.03094
24.12	5.14614	0.477391	24.12	1.60931	1.02052
24.14	5.12422	0.888735	24.14	1.65372	1.0617
24.16	5.05514	0.980133	24.16	1.65295	1.05341
24.18	4.91057	0.894363	24.18	1.71121	1.04388
24.2	4.81606	0.851934	24.2	1.66411	1.03677
24.22	4.82886	0.46581	24.22	1.67909	1.02781
24.24	5.0175	1.02304	24.24	1.7248	1.06084
24.26	5.16839	0.44243	24.26	1.68436	0.986558
24.28	5.2941	0.956884	24.28	1.77313	1.07163
24.3	5.28306	0.918784	24.3	1.70855	1.14234
24.32	5.55428	0.852742	24.32	1.767	1.11866
24.34	5.41817	0.954355	24.34	1.74393	1.01711
24.36	5.49127	0.75635	24.36	1.76705	1.11457
24.38	5.29806	0.927396	24.38	1.78203	0.958104
24.4	5.28664	0.965634	24.4	1.76544	1.01301
24.42	5.37823	0.957367	24.42	1.79699	1.08829
24.44	5.38714	0.878343	24.44	1.70644	1.03223
24.46	5.35279	0.720621	24.46	1.71584	0.679072
24.48	5.24542	0.435561	24.48	1.76236	0.85434
24.5	5.22635	0.898642	24.5	1.7548	0.787839
24.52	5.26143	0.947882	24.52	1.68829	0.939591
24.54	5.34688	0.960992	24.54	1.73287	1.13538
24.56	5.35644	0.564138	24.56	1.73118	1.00652
24.58	5.37556	0.803258	24.58	1.7025	0.986117
24.6	5.30229	0.434505	24.6	1.79804	0.988726
24.62	5.23404	0.564061	24.62	1.7901	1.07239
24.64	5.30582	0.439448	24.64	1.79982	0.825624
24.66	5.36454	0.635192	24.66	1.80051	0.941369
24.68	5.23943	0.596074	24.68	1.81699	1.10482
24.7	5.07509	0.489026	24.7	1.67985	1.07213
24.72	5.05211	0.756637	24.72	1.73085	1.01081
24.74	4.98081	0.962562	24.74	1.73407	1.07933
24.76	4.96076	0.952852	24.76	1.76687	1.05397
24.78	4.88579	0.580449	24.78	1.803	0.896811
24.8	4.87141	0.648421	24.8	1.67444	0.687031
24.82	4.91126	0.945499	24.82	1.69697	0.917857
24.84	4.92758	0.883587	24.84	1.65568	0.851165
24.86	5.01216	0.619561	24.86	1.67173	0.673904
24.88	4.8073	0.941991	24.88	1.66446	0.686751
24.9	4.80713	0.876417	24.9	1.77334	1.18921
24.92	5.03026	0.921057	24.92	1.70909	0.97626
24.94	4.8902	0.96024	24.94	1.79151	1.04891
24.96	4.95958	1.03608	24.96	1.7959	1.02585
24.98	5.0351	0.916318	24.98	1.69126	1.00168
25	5.1732	0.670039	25	1.61718	1.07343
25.02	5.2374	0.90641	25.02	1.66207	0.961315
25.04	5.25256	0.904397	25.04	1.67111	0.887511
25.06	5.21492	0.332084	25.06	1.77044	0.991475
25.08	5.06679	0.575226	25.08	1.6878	1.00519
25.1	5.25548	0.637632	25.1	1.76891	1.13104
25.12	5.29325	0.672033	25.12	1.83464	1.09645
25.14	5.24602	0.45958	25.14	1.7635	1.01571
25.16	5.32389	0.508026	25.16	1.7649	0.96463
25.18	5.34587	0.662411	25.18	1.77834	0.947425
25.2	5.24789	1.09818	25.2	1.746	0.962678
25.22	5.41108	0.995737	25.22	1.84294	0.894281
25.24	5.40096	1.01816	25.24	1.95288	0.865148
25.26	5.41157	0.994354	25.26	1.92752	1.00542
25.28	5.67254	0.957149	25.28	1.84062	0.989753
25.3	5.70746	0.968979	25.3	1.72635	0.881112
25.32	5.48144	0.606678	25.32	1.82114	1.06254
25.34	5.42217	0.667514	25.34	1.79342	1.08185
25.36	5.57587	0.812641	25.36	1.83535	1.09004
25.38	5.55399	1.07631	25.38	1.82863	1.01111
25.4	5.46986	1.0834	25.4	1.66236	1.00401
25.42	5.3673	1.03656	25.42	1.8063	0.701235
25.44	5.39465	0.886628	25.44	1.71311	0.80272
25.46	5.36725	0.864083	25.46	1.75849	1.00694
25.48	5.49596	0.790006	25.48	1.80381	0.906854
25.5	5.46581	1.01918	25.5	1.77595	0.994812
25.52	5.31942	1.04169	25.52	1.79262	0.954305
25.54	5.27717	1.06412	25.54	1.68417	1.15582
25.56	5.07463	1.07583	25.56	1.72202	1.09323
25.58	5.19956	1.01134	25.58	1.67849	1.15602
25.6	4.94031	0.87038	25.6	1.71261	1.02784
25.62	4.88169	1.0454	25.62	1.68217	0.959451
25.64	5.14443	1.02981	25.64	1.63124	1.07529
25.66	5.21736	1.03748	25.66	1.69843	1.04737
25.68	5.19847	1.00637	25.68	1.72275	0.994717
25.7	5.2901	0.701157	25.7	1.6883	1.07348
25.72	5.34515	1.17482	25.72	1.67812	0.945638
25.74	5.364	1.07954	25.74	1.69971	0.952014
25.76	5.32605	1.14369	25.76	1.60115	0.714678
25.78	5.23622	1.08709	25.78	1.702	0.920046
25.8	5.0377	0.976153	25.8	1.81207	0.813169
25.82	5.02584	0.96906	25.82	1.75447	0.935533
25.84	4.98136	0.831188	25.84	1.77051	1.05078
25.86	4.93145	0.881429	25.86	1.76216	0.929627
25.88	4.775	0.782138	25.88	1.75049	0.893898
25.9	4.73059	1.04213	25.9	1.79606	1.08353
25.92	4.51326	0.977219	25.92	1.82938	1.12719
25.94	4.32901	1.00184	25.94	1.85884	0.972498
25.96	4.42215	1.07288	25.96	1.89988	1.07756
25.98	4.49807	0.815115	25.98	1.85196	0.966147
26	4.49523	0.898312	26	1.85061	1.02853
26.02	4.77711	0.756372	26.02	1.80226	0.93854
26.04	4.68433	1.02357	26.04	1.82239	1.04801
26.06	4.62725	0.988604	26.06	1.75662	1.11189
26.08	4.69509	0.700915	26.08	1.77386	1.02916
26.1	4.7251	0.785812	26.1	1.72291	1.01374
26.12	4.7541	0.971873	26.12	1.66226	0.952169
26.14	4.71264	1.08962	26.14	1.67542	0.948844
26.16	4.93321	0.582438	26.16	1.63942	0.982437
26.18	4.71093	1.17612	26.18	1.76092	0.983131
26.2	4.79209	0.899663	26.2	1.73932	0.979439
26.22	4.82556	0.646295	26.22	1.69284	0.971501
26.24	4.76743	0.734134	26.24	1.70481	1.04948
26.26	4.6862	0.838717	26.26	1.77548	1.09738
26.28	4.63703	0.98187	26.28	1.74667	0.861987
26.3	4.59043	1.09043	26.3	1.74046	0.962995
26.32	4.50163	0.949752	26.32	1.72585	0.982924
26.34	4.49183	1.06498	26.34	1.73538	1.01246
26.36	4.52062	0.947423	26.36	1.70339	0.952356
26.38	4.63199	1.03744	26.38	1.71833	1.0387
26.4	4.80201	1.04049	26.4	1.70715	1.08733
26.42	4.85718	0.78652	26.42	1.77643	1.0773
26.44	4.96608	0.758978	26.44	1.75642	1.09235
26.46	4.95417	0.743502	26.46	1.81664	0.724607
26.48	4.93126	0.758561	26.48	1.7904	0.932857
26.5	4.92902	0.767038	26.5	1.87447	1.04184
26.52	4.93432	1.11573	26.52	1.85432	0.956065
26.54	4.93804	1.07153	26.54	1.82502	0.687696
26.56	5.01395	1.08042	26.56	1.79924	0.730375
26.58	4.87849	1.04584	26.58	1.72127	0.807305
26.6	5.16541	1.007	26.6	1.80351	0.842082
26.62	5.16019	1.02741	26.62	1.73569	0.794026
26.64	5.23241	1.07806	26.64	1.62734	0.82542
26.66	5.08444	1.14026	26.66	1.62942	0.742173
26.68	5.12388	1.11312	26.68	1.59559	1.076
26.7	5.2141	1.03776	26.7	1.63512	1.11003
26.72	5.12199	0.986031	26.72	1.70868	0.802976
26.74	5.01947	1.11419	26.74	1.78209	0.757366
26.76	4.79224	0.727597	26.76	1.68956	1.06519
26.78	4.85338	1.05087	26.78	1.72608	1.05378
26.8	4.89534	1.13978	26.8	1.6271	1.05626
26.82	4.90213	0.828371	26.82	1.68718	1.06651
26.84	4.97642	0.749495	26.84	1.73241	1.08312
26.86	4.97623	1.02222	26.86	1.68698	1.06937
26.88	4.85557	1.06183	26.88	1.72608	0.984963
26.9	4.86414	1.02928	26.9	1.71527	0.995512
26.92	4.9199	1.01139	26.92	1.76056	1.009
26.94	4.94783	1.05342	26.94	1.66808	1.11398
26.96	4.88892	0.872767	26.96	1.7077	1.07231
26.98	5.03389	1.06497	26.98	1.70468	1.1423
27	5.06987	0.707457	27	1.65411	1.11254
27.02	5.06507	0.823429	27.02	1.66487	1.10694
27.04	5.04498	0.80983	27.04	1.72248	1.02471
27.06	5.1788	0.612996	27.06	1.62459	0.813894
27.08	5.23135	0.986006	27.08	1.66355	1.06021
27.1	5.36994	1.03303	27.1	1.67524	0.988327
27.12	5.27801	0.649137	27.12	1.62933	1.00346
27.14	5.35117	1.03668	27.14	1.62394	0.982531
27.16	5.32939	1.017	27.16	1.75576	0.99395
27.18	5.18402	1.01983	27.18	1.74705	0.98632
27.2	5.3711	1.14217	27.2	1.71521	0.585006
27.22	5.40961	1.04051	27.22	1.72879	0.651295
27.24	5.23012	0.657175	27.24	1.80251	1.04848
27.26	5.22749	0.830013	27.26	1.7825	1.02978
27.28	5.26301	0.596868	27.28	1.75611	1.07128
27.3	5.35399	0.825736	27.3	1.75498	1.10151
27.32	5.47439	1.12071	27.32	1.82706	0.981862
27.34	5.56149	0.703286	27.34	1.79826	0.993496
27.36	5.35167	1.05452	27.36	1.82264	0.783512
27.38	5.35653	0.852731	27.38	1.79439	1.07933
27.4	5.60755	0.644257	27.4	1.79621	1.0213
27.42	5.5134	0.598659	27.42	1.73235	1.0146
27.44	5.53633	0.7193	27.44	1.72378	1.24181
27.46	5.5302	0.815993	27.46	1.77854	0.819834
27.48	5.51743	1.09152	27.48	1.73081	0.980005
27.5	5.39822	1.10518	27.5	1.6664	1.03575
27.52	5.54321	0.768639	27.52	1.62451	1.14284
27.54	5.35195	0.621527	27.54	1.69566	1.01638
27.56	5.48447	0.841728	27.56	1.70582	0.755737
27.58	5.36082	1.02098	27.58	1.72021	0.750452
27.6	5.39211	1.02411	27.6	1.65735	0.659654
27.62	5.58045	1.08077	27.62	1.63564	0.690345
27.64	5.56906	1.08786	27.64	1.72131	0.804498
27.66	5.43803	1.00509	27.66	1.69913	0.77817
27.68	5.42378	1.07052	27.68	1.62421	0.98003
27.7	5.45375	0.792674	27.7	1.69042	1.06277
27.72	5.50394	1.08009	27.72	1.69424	0.929737
27.74	5.59161	0.858516	27.74	1.70154	0.986422
27.76	5.5515	0.85646	27.76	1.72621	0.960484
27.78	5.3949	0.835109	27.78	1.67529	1.00012
27.8	5.49525	1.10039	27.8	1.77503	1.01983
27.82	5.445	0.988312	27.82	1.64782	1.05193
27.84	5.47115	0.863098	27.84	1.67618	1.01126
27.86	5.46768	1.03852	27.86	1.74158	1.08634
27.88	5.40869	0.797211	27.88	1.71272	1.04145
27.9	5.64884	0.854025	27.9	1.70116	1.04811
27.92	5.64392	0.770115	27.92	1.66369	1.08437
27.94	5.61773	0.754951	27.94	1.7556	1.07184
27.96	5.5808	0.866356	27.96	1.7143	1.0679
27.98	5.73516	0.641485	27.98	1.71247	1.08403
28	5.62595	1.0836	28	1.76136	0.862491
28.02	5.63317	1.05385	28.02	1.69442	1.00572
28.04	5.60071	0.910917	28.04	1.76792	1.10725
28.06	5.40809	1.01555	28.06	1.66245	1.00849
28.08	5.37686	0.781084	28.08	1.79291	1.18564
28.1	5.32889	0.829442	28.1	1.69728	0.97265
28.12	5.18857	0.930083	28.12	1.77673	1.09615
28.14	5.26412	1.02111	28.14	1.82871	0.701453
28.16	5.36096	1.03084	28.16	1.84864	1.00731
28.18	5.18921	1.07049	28.18	1.81315	1.00091
28.2	5.28496	0.823771	28.2	1.85498	0.89536
28.22	5.24741	0.944129	28.22	1.93393	1.00098
28.24	5.19769	0.942709	28.24	1.91337	0.968427
28.26	5.30691	0.736669	28.26	1.88132	1.16896
28.28	5.19393	0.676642	28.28	1.91548	0.994028
28.3	5.31648	1.0228	28.3	1.89526	1.05567
28.32	5.2924	0.846608	28.32	1.96346	0.945136
28.34	5.18868	1.08519	28.34	1.98152	0.917882
28.36	5.14879	0.977715	28.36	2.04	1.03581
28.38	5.00272	0.929983	28.38	1.95298	0.953543
28.4	5.00435	1.06726	28.4	1.8617	1.03125
28.42	4.80756	1.13075	28.42	1.85646	0.980931
28.44	4.94046	0.891495	28.44	1.91315	0.893095
28.46	4.87024	1.07621	28.46	1.89641	1.01513
28.48	4.89361	1.17484	28.48	1.7772	0.979784
28.5	5.07774	0.842627	28.5	1.84331	1.11193
28.52	5.0367	0.859603	28.52	1.81773	1.02403
28.54	5.01239	0.802027	28.54	1.85924	0.993218
28.56	5.02503	1.01932	28.56	1.85121	1.13176
28.58	5.08753	1.06684	28.58	1.95376	1.00431
28.6	5.18017	0.657254	28.6	1.86995	1.00733
28.62	5.21903	1.06431	28.62	1.93967	1.01099
28.64	5.29155	0.742355	28.64	1.99033	1.045
28.66	5.23241	1.12445	28.66	1.99915	1.08375
28.68	5.21849	1.09752	28.68	1.95465	0.9422
28.7	5.21747	0.95076	28.7	1.83893	0.95616
28.72	5.29512	0.746457	28.72	1.90259	1.01302
28.74	5.38297	0.814804	28.74	1.8805	0.994544
28.76	5.33825	0.864855	28.76	1.84867	0.957419
28.78	5.49254	0.702751	28.78	1.90582	1.0565
28.8	5.33954	1.05361	28.8	1.91299	0.85205
28.82	5.2941	0.936502	28.82	1.78568	0.744968
28.84	5.38037	1.10784	28.84	1.88253	0.768455
28.86	5.29528	1.07045	28.86	1.83496	0.748176
28.88	5.21077	1.09665	28.88	1.79662	0.64999
28.9	5.43544	0.736617	28.9	1.8575	0.814023
28.92	5.4848	0.846471	28.92	1.81177	0.862807
28.94	5.34988	0.728541	28.94	1.8621	0.806961
28.96	5.47514	0.646834	28.96	1.79112	0.73371
28.98	5.53915	0.846099	28.98	1.89854	0.747288
29	5.40964	1.03275	29	1.83499	0.970225
29.02	5.33743	1.07025	29.02	1.85806	0.96029
29.04	5.45644	1.06049	29.04	1.81882	0.914874
29.06	5.26774	1.08068	29.06	1.77713	1.05071
29.08	5.21855	1.01891	29.08	1.85234	0.988697
29.1	5.08626	0.637861	29.1	1.93747	1.06497
29.12	5.28822	0.863685	29.12	1.89094	1.06161
29.14	5.27925	0.834504	29.14	1.96032	1.12375
29.16	5.31745	1.0903	29.16	1.86708	1.12717
29.18	5.37472	0.997766	29.18	1.97289	1.04543
29.2	5.50405	0.763968	29.2	1.99245	0.964736
29.22	5.52371	0.763088	29.22	1.95916	0.842607
29.24	5.47876	0.889396	29.24	2.06086	0.936832
29.26	5.47081	0.85118	29.26	1.93173	1.01939
29.28	5.41755	0.641706	29.28	1.92571	1.06825
29.3	5.34089	1.08678	29.3	1.96293	0.842497
29.32	5.2531	1.08852	29.32	1.98543	0.784228
29.34	5.31751	0.773345	29.34	1.98147	0.641966
29.36	5.48388	1.01525	29.36	1.89276	0.955957
29.38	5.50417	1.09427	29.38	2.01298	0.768976
29.4	5.48302	0.840361	29.4	2.04195	0.805473
29.42	5.53285	0.688547	29.42	2.04924	0.700129
29.44	5.53819	0.807448	29.44	2.04447	0.963344
29.46	5.62978	0.726139	29.46	2.01575	0.775551
29.48	5.47022	0.827391	29.48	2.07089	0.834373
29.5	5.38213	0.744515	29.5	2.08845	0.60741
29.52	5.51017	0.871838	29.52	2.09307	0.877055
29.54	5.69363	0.77706	29.54	2.02665	1.10888
29.56	5.64504	0.749721	29.56	2.03785	0.889293
29.58	5.60202	0.5941	29.58	1.89007	1.05316
29.6	5.55741	0.849734	29.6	1.84143	1.11895
29.62	5.62231	1.0215	29.62	1.88351	1.04621
29.64	5.5484	0.827232	29.64	1.87792	1.13399
29.66	5.43599	0.717964	29.66	1.92902	0.995546
29.68	5.36586	0.825046	29.68	1.90544	1.07338
29.7	5.5346	0.687963	29.7	1.92002	1.06692
29.72	5.58248	1.09683	29.72	1.9088	0.958589
29.74	5.67233	0.910908	29.74	2.07535	0.621842
29.76	5.68006	0.931396	29.76	2.01451	0.758026
29.78	5.67527	0.89644	29.78	1.99299	1.04635
29.8	5.60596	0.946015	29.8	2.04428	1.02649
29.82	5.60615	0.763823	29.82	1.94287	0.911137
29.84	5.58962	1.01661	29.84	2.00249	0.883534
29.86	5.6619	1.10264	29.86	1.95848	0.854368
29.88	5.55176	1.0705	29.88	2.01002	1.05314
29.9	5.46674	1.03576	29.9	2.05177	1.07604
29.92	5.58978	1.13207	29.92	2.00685	0.858424
29.94	5.64013	0.866335	29.94	2.00919	1.01928
29.96	5.71959	0.937048	29.96	1.96319	0.849139
29.98	5.74754	1.06927	29.98	1.95868	0.841813
30	5.75955	1.01147	30	1.89455	1.0332
30.02	5.60475	1.10805	30.02	1.85475	0.973166
30.04	5.58672	0.777727	30.04	1.81719	0.952305
30.06	5.66298	0.966363	30.06	1.92998	1.09806
30.08	5.70166	1.14131	30.08	2.04412	0.936857
30.1	5.79475	1.1201	30.1	1.9751	1.10716
30.12	5.89051	1.16216	30.12	1.87958	0.895571
30.14	5.85164	1.01708	30.14	1.80259	0.973613
30.16	5.82285	0.827037	30.16	1.8432	1.02735
30.18	5.71306	0.909094	30.18	1.82296	1.15585
30.2	5.7163	1.08527	30.2	1.85824	0.96476
30.22	5.57089	0.700015	30.22	1.86471	1.06086
30.24	5.74516	0.858938	30.24	1.79315	0.812725
30.26	5.77077	1.06609	30.26	1.80981	1.06997
30.28	5.65599	1.08623	30.28	1.93335	0.959726
30.3	5.56039	1.06002	30.3	1.82777	0.91278
30.32	5.6707	1.07766	30.32	1.91155	1.03156
30.34	5.61227	0.894219	30.34	1.90498	1.04555
30.36	5.55836	0.92763	30.36	1.88572	1.03608
30.38	5.54062	1.04512	30.38	1.84391	0.988293
30.4	5.55385	0.865259	30.4	1.83981	1.01982
30.42	5.57803	1.09012	30.42	1.8929	1.08758
30.44	5.55454	1.04932	30.44	1.83973	1.08182
30.46	5.63275	1.09993	30.46	1.82053	0.958762
30.48	5.75613	1.02992	30.48	1.97894	0.871988
30.5	5.76987	0.821603	30.5	1.92563	0.509896
30.52	5.65409	0.973896	30.52	1.78384	0.90849
30.54	5.76174	0.816649	30.54	1.88894	0.931587
30.56	5.82502	1.02325	30.56	1.90841	0.840241
30.58	5.71333	0.856501	30.58	1.87188	0.786665
30.6	5.70863	1.00796	30.6	1.86599	1.09368
30.62	5.71245	1.03204	30.62	1.8837	0.956224
30.64	5.68161	0.709338	30.64	1.81964	0.801841
30.66	5.90817	0.881038	30.66	1.89721	0.900341
30.68	5.791	0.842915	30.68	1.97403	0.907495
30.7	5.88296	0.891093	30.7	1.82359	0.947202
30.72	5.77307	0.756674	30.72	1.93399	0.914209
30.74	5.72259	1.13884	30.74	1.90862	1.02381
30.76	5.72777	1.00905	30.76	1.78671	0.879549
30.78	5.58722	0.947164	30.78	1.88642	0.554599
30.8	5.62533	0.638271	30.8	1.87508	0.587175
30.82	5.72983	0.874284	30.82	1.94459	0.990133
30.84	5.74758	0.56244	30.84	1.85199	0.963536
30.86	5.7864	0.834254	30.86	1.83784	0.836423
30.88	5.86902	1.07216	30.88	1.90343	0.780928
30.9	5.80862	0.826656	30.9	1.92949	0.942272
30.92	5.76813	0.776804	30.92	1.97905	0.829119
30.94	5.79851	0.765147	30.94	1.8714	0.93822
30.96	5.69612	0.762013	30.96	1.92378	0.704382
30.98	5.81882	1.07891	30.98	1.88768	0.949752
31	5.78094	1.04966	31	1.92166	0.98314
31.02	5.70839	0.682305	31.02	1.82781	0.982976
31.04	5.85847	0.688863	31.04	1.89357	0.52986
31.06	5.73624	0.858883	31.06	1.85414	0.533165
31.08	5.88731	0.785352	31.08	1.873	0.711546
31.1	5.9762	0.835686	31.1	1.8962	0.71254
31.12	5.784	0.870694	31.12	1.87491	0.603662
31.14	5.93566	0.883822	31.14	2.00859	0.705706
31.16	5.82611	1.05406	31.16	2.0156	0.809809
31.18	5.81048	1.06939	31.18	1.85718	0.604994
31.2	5.74398	1.07401	31.2	1.88239	0.39839
31.22	5.85296	1.07264	31.22	1.92248	0.657459
31.24	5.90256	1.09674	31.24	1.85631	0.619901
31.26	5.7328	0.854174	31.26	1.82779	0.876142
31.28	5.76998	1.09823	31.28	1.96642	0.851825
31.3	5.83702	1.14117	31.3	1.80144	0.865085
31.32	5.75349	1.1413	31.32	1.79002	0.943433
31.34	5.60667	0.975219	31.34	1.81091	0.858419
31.36	5.7332	1.04522	31.36	1.89054	0.792788
31.38	5.71251	0.756951	31.38	1.90815	0.820601
31.4	5.80285	1.15944	31.4	1.9319	0.53595
31.42	5.85113	1.05228	31.42	1.91708	0.718817
31.44	5.73271	0.999597	31.44	1.96757	0.619178
31.46	5.71042	1.06762	31.46	1.91528	0.820165
31.48	5.77263	1.02388	31.48	1.92209	0.914426
31.5	5.83028	1.03571	31.5	1.93533	1.04095
31.52	5.82362	1.09715	31.52	1.8459	0.785602
31.54	5.78872	1.04158	31.54	1.78699	0.818182
31.56	5.77173	0.996635	31.56	1.85301	1.02963
31.58	5.75861	0.940506	31.58	1.8433	1.0302
31.6	5.89913	1.03504	31.6	1.80082	0.73049
31.62	5.80556	0.793055	31.62	1.78758	0.939888
31.64	5.61172	0.878528	31.64	1.88012	0.962653
31.66	5.61647	1.06058	31.66	1.87636	1.19205
31.68	5.80325	0.818206	31.68	1.89156	0.961892
31.7	5.66748	0.723895	31.7	1.926	1.06257
31.72	5.88459	1.06814	31.72	1.91452	1.01118
31.74	5.92754	0.747986	31.74	1.84858	0.861314
31.76	5.82772	1.03643	31.76	1.85103	0.794788
31.78	5.84087	0.781046	31.78	1.87758	0.509498
31.8	5.83976	0.724036	31.8	1.89518	0.782494
31.82	5.7904	0.729401	31.82	1.92913	0.838085
31.84	5.88708	0.68627	31.84	1.84294	0.717407
31.86	5.85019	0.776392	31.86	1.8799	0.796096
31.88	5.82012	0.722648	31.88	2.04885	0.755956
31.9	5.85194	0.70998	31.9	1.98458	0.73266
31.92	5.92706	1.05209	31.92	1.90271	0.927516
31.94	5.97462	1.03114	31.94	1.87086	0.665074
31.96	5.86788	1.09397	31.96	1.87497	0.877947
31.98	5.70259	1.04907	31.98	1.88694	0.847785
32	5.86671	1.01267	32	1.91334	0.994645
32.02	6.0115	0.801302	32.02	1.86151	1.01467
32.04	5.84868	1.04516	32.04	1.86713	0.66133
32.06	5.87802	1.06377	32.06	1.92502	0.866538
32.08	5.78619	1.07482	32.08	1.90981	0.897872
32.1	5.89529	1.00254	32.1	1.92908	0.957003
32.12	5.79364	1.05863	32.12	1.86779	0.615547
32.14	6.05502	0.923595	32.14	1.88617	0.566464
32.16	5.99805	0.960961	32.16	1.93888	0.786036
32.18	5.8547	1.01136	32.18	1.86506	0.70891
32.2	5.98136	1.10321	32.2	1.82931	0.903038
32.22	5.97906	1.03239	32.22	1.83014	0.945247
32.24	6.0254	0.727989	32.24	1.83015	0.808555
32.26	6.04389	0.812332	32.26	1.79884	0.846253
32.28	5.93481	1.03365	32.28	1.82113	0.90097
32.3	6.05415	1.02494	32.3	1.74624	0.785733
32.32	5.94815	0.873706	32.32	1.82883	0.87714
32.34	6.00904	1.05764	32.34	1.84511	0.73963
32.36	5.90314	0.698874	32.36	1.82644	0.844035
32.38	5.81135	0.83241	32.38	1.79662	1.06215
32.4	5.81979	0.918562	32.4	1.87357	1.048
32.42	5.94981	0.883624	32.42	1.97533	1.08416
32.44	5.88879	0.740612	32.44	1.88859	1.04062
32.46	5.83208	1.07634	32.46	1.89848	0.840945
32.48	5.93474	0.75179	32.48	1.78512	1.08091
32.5	6.05146	0.604673	32.5	1.79997	1.00582
32.52	6.04404	0.72561	32.52	1.81738	1.11256
32.54	6.10576	0.659658	32.54	1.88269	1.05323
32.56	6.0515	0.75972	32.56	1.99512	1.19975
32.58	6.05724	0.718131	32.58	1.91976	0.825749
32.6	6.03726	1.00888	32.6	1.91878	0.771286
32.62	6.0588	1.0178	32.62	1.82301	1.03225
32.64	5.92396	1.04897	32.64	1.95123	1.01243
32.66	6.02075	1.13802	32.66	1.99401	0.956164
32.68	6.06522	1.06181	32.68	2.07156	1.01824
32.7	6.07471	0.988886	32.7	1.9149	0.955012
32.72	5.95277	0.892711	32.72	1.90732	0.987879
32.74	5.9869	0.798432	32.74	1.8942	1.07591
32.76	6.1322	0.796975	32.76	1.81418	0.791482
32.78	6.10411	1.01615	32.78	1.84069	0.930847
32.8	5.97644	0.847606	32.8	1.85987	1.00214
32.82	5.94558	0.813945	32.82	1.91243	0.922973
32.84	5.94246	0.974485	32.84	1.93461	0.982727
32.86	5.84201	0.915899	32.86	1.94705	0.917513
32.88	5.82179	0.94886	32.88	1.91016	1.17301
32.9	5.65566	0.859921	32.9	1.90752	0.55938
32.92	5.82252	0.75841	32.92	1.87783	1.03967
32.94	5.97206	0.785131	32.94	1.91456	1.05453
32.96	5.98606	0.824081	32.96	1.9508	0.929436
32.98	6.02963	1.1232	32.98	1.9843	0.996242
33	5.9721	1.05757	33	1.8741	0.987542
33.02	5.95033	1.00363	33.02	1.9671	0.969005
33.04	5.79433	1.14387	33.04	1.84594	1.02744
33.06	5.77051	0.950742	33.06	1.89318	1.17723
33.08	5.73589	1.07097	33.08	1.82009	1.03249
33.1	5.69724	0.692823	33.1	1.82971	1.00277
33.12	5.70903	1.11239	33.12	1.92484	0.893487
33.14	5.74789	1.0382	33.14	1.8493	0.959077
33.16	5.76589	1.09586	33.16	1.89179	0.889847
33.18	5.79487	1.09804	33.18	1.93772	0.88578
33.2	5.72451	1.03161	33.2	1.87856	1.02806
33.22	5.58882	0.756032	33.22	1.9393	0.762552
33.24	5.47626	0.848011	33.24	1.95718	0.914874
33.26	5.44988	1.08094	33.26	2.04709	1.15922
33.28	5.56622	1.04838	33.28	2.02462	0.985284
33.3	5.52377	1.08385	33.3	1.87742	1.04061
33.32	5.40765	1.00324	33.32	1.99523	0.888565
33.34	5.57167	1.03682	33.34	2.07399	1.06027
33.36	5.6726	0.710007	33.36	2.10319	1.02121
33.38	5.59296	0.678506	33.38	1.99871	0.970912
33.4	5.74538	0.846787	33.4	2.07504	0.973095
33.42	5.49787	1.08691	33.42	2.0292	0.917292
33.44	5.55347	1.00452	33.44	1.99377	1.01004
33.46	5.58986	0.965219	33.46	1.99335	1.03232
33.48	5.54071	0.977518	33.48	2.08325	0.975813
33.5	5.57428	1.04575	33.5	1.98246	0.976738
33.52	5.71484	0.822302	33.52	2.02717	0.955859
33.54	5.66833	0.874246	33.54	1.98954	0.959988
33.56	5.66313	0.659209	33.56	2.01526	0.990409
33.58	5.70595	0.839892	33.58	1.97571	0.99435
33.6	5.56864	0.836509	33.6	2.0177	1.07316
33.62	5.73742	0.905204	33.62	1.92767	1.00302
33.64	5.64585	1.00581	33.64	1.85944	1.14393
33.66	5.84777	0.719632	33.66	1.94108	1.06426
33.68	5.90739	0.865594	33.68	1.90192	0.892434
33.7	5.82103	1.06878	33.7	1.97863	1.11178
33.72	5.64758	1.10388	33.72	1.92728	0.973365
33.74	5.70175	1.09823	33.74	1.90521	1.06066
33.76	5.68313	0.777137	33.76	1.84917	1.05803
33.78	5.79554	1.08622	33.78	1.88991	0.672713
33.8	5.73306	1.08427	33.8	1.95857	1.11264
33.82	5.69805	1.08729	33.82	1.9476	1.0667
33.84	5.64636	1.04401	33.84	1.95625	1.04541
33.86	5.6091	1.08782	33.86	1.88775	1.06597
33.88	5.57632	0.994984	33.88	1.97885	0.872183
33.9	5.70076	1.02528	33.9	1.91801	1.05991
33.92	5.84487	0.999351	33.92	1.94222	0.941059
33.94	5.85472	1.01267	33.94	1.89628	1.01082
33.96	5.82213	0.988202	33.96	1.89578	1.04594
33.98	5.74774	0.818259	33.98	2.03545	1.09341
34	5.75482	0.856021	34	1.89946	0.988023
34.02	5.74409	1.10366	34.02	1.90975	0.984986
34.04	5.59973	0.739817	34.04	2.00653	0.948343
34.06	5.56888	0.676075	34.06	1.88603	1.09857
34.08	5.61616	0.9244	34.08	1.88649	1.02629
34.1	5.6878	0.991517	34.1	1.84233	0.980283
34.12	5.61826	0.920933	34.12	1.91268	1.06348
34.14	5.63045	0.842495	34.14	1.88692	1.00474
34.16	5.57681	1.11064	34.16	1.86292	1.02141
34.18	5.49883	1.16749	34.18	1.78315	1.04755
34.2	5.43307	1.0625	34.2	1.86256	0.970401
34.22	5.60016	0.862452	34.22	1.90501	1.14088
34.24	5.67585	1.00023	34.24	1.95064	1.05444
34.26	5.75815	1.12144	34.26	1.92104	1.05329
34.28	5.59885	1.06481	34.28	1.91375	1.0462
34.3	5.73229	1.06545	34.3	1.98916	0.947824
34.32	5.71126	1.01703	34.32	1.99956	0.997012
34.34	5.66738	0.717128	34.34	1.85317	1.03708
34.36	5.71884	0.823207	34.36	1.94597	1.01837
34.38	5.87005	0.918356	34.38	1.94723	0.820648
34.4	5.87451	0.764404	34.4	1.87098	0.670106
34.42	5.79505	0.629488	34.42	1.9754	0.987434
34.44	5.71916	0.831958	34.44	1.9407	0.982888
34.46	5.7022	0.888958	34.46	1.90422	1.05966
34.48	5.83586	0.757087	34.48	1.8631	1.10441
34.5	5.80084	0.848036	34.5	1.8112	1.2242
34.52	5.86418	0.743392	34.52	1.75665	0.96214
34.54	5.96752	0.909185	34.54	1.78666	0.976387
34.56	5.85677	0.804719	34.56	1.85751	1.14597
34.58	5.78092	1.05147	34.58	1.98263	1.01945
34.6	5.71197	1.12126	34.6	2.014	0.995715
34.62	5.76571	1.00258	34.62	1.99569	0.846758
34.64	5.58288	1.01644	34.64	1.97005	0.762621
34.66	5.76939	1.05493	34.66	2.05332	0.761957
34.68	5.62419	1.09295	34.68	1.95051	0.811669
34.7	5.62215	1.08094	34.7	1.932	0.831063
34.72	5.58368	1.05088	34.72	2.00674	0.764707
34.74	5.75931	1.03275	34.74	1.94255	0.757428
34.76	5.93273	0.638686	34.76	1.95929	0.824537
34.78	5.75988	0.842879	34.78	1.82849	0.932893
34.8	5.748	0.847831	34.8	1.86381	0.730979
34.82	5.72559	0.882336	34.82	1.82277	0.743425
34.84	5.62437	0.930692	34.84	1.79267	0.919203
34.86	5.63751	1.02355	34.86	1.93055	1.0287
34.88	5.69315	1.04788	34.88	1.92388	1.05031
34.9	5.74151	0.716259	34.9	1.73982	0.899108
34.92	5.82152	1.01614	34.92	1.74985	0.925176
34.94	5.79198	1.03127	34.94	1.76044	1.0123
34.96	5.71013	1.07211	34.96	1.76679	1.06571
34.98	5.72131	1.05637	34.98	1.82474	0.900882
35	5.62735	0.950261	35	1.92939	0.935068
35.02	5.70758	1.08124	35.02	1.92722	1.02523
35.04	5.83562	1.05915	35.04	1.847	1.01844
35.06	5.82886	0.983576	35.06	1.86341	0.768592
35.08	5.88805	0.89352	35.08	1.93673	0.957585
35.1	5.83547	1.08541	35.1	1.88341	0.866189
35.12	5.86037	1.03405	35.12	2.03684	0.941265
35.14	5.8307	1.15841	35.14	1.95844	0.855039
35.16	5.69778	1.09144	35.16	2.04517	0.783981
35.18	5.76369	0.833725	35.18	2.11087	0.819156
35.2	5.71936	0.881954	35.2	1.9506	0.862667
35.22	5.71908	1.00848	35.22	2.11515	1.07409
35.24	5.79494	1.04403	35.24	1.95074	0.966489
35.26	5.71484	1.11931	35.26	1.98608	0.58742
35.28	5.96827	1.05098	35.28	1.98263	0.953724
35.3	5.97535	1.0827	35.3	2.00531	0.780484
35.32	5.90925	1.05562	35.32	1.86689	0.792736
35.34	5.93165	0.913687	35.34	1.84624	0.855152
35.36	5.8988	1.10347	35.36	1.99925	1.04604
35.38	5.82424	0.759378	35.38	1.98107	0.912546
35.4	5.94738	0.76945	35.4	1.9841	0.691823
35.42	5.94532	0.833321	35.42	1.99253	0.863139
35.44	5.90351	1.11361	35.44	2.01856	0.688193
35.46	5.87527	0.647684	35.46	2.00395	0.685085
35.48	5.80053	0.657686	35.48	2.05683	1.0991
35.5	5.78018	0.85311	35.5	2.1136	0.958096
35.52	5.84485	0.91604	35.52	2.22027	1.02388
35.54	5.80796	0.851219	35.54	2.13869	1.03046
35.56	5.94451	0.779575	35.56	2.19196	0.639565
35.58	5.74022	0.864139	35.58	2.27452	0.6874
35.6	5.86246	1.04108	35.6	2.17059	0.744338
35.62	5.87138	0.792695	35.62	2.14882	0.764977
35.64	5.82309	1.0191	35.64	2.18459	0.531321
35.66	5.8601	1.05913	35.66	2.13603	0.996888
35.68	5.87071	0.831023	35.68	2.16805	0.711471
35.7	5.7613	0.765913	35.7	2.13808	0.828979
35.72	5.64422	0.795814	35.72	2.16462	0.81426
35.74	5.87178	0.747639	35.74	2.2127	0.89037
35.76	5.70994	1.04044	35.76	2.21295	0.701499
35.78	5.80691	1.14504	35.78	2.19772	0.894564
35.8	5.87517	0.762383	35.8	2.1066	0.973594
35.82	5.74757	0.822974	35.82	2.1647	0.786186
35.84	5.82384	0.839099	35.84	2.21577	0.647283
35.86	5.85076	1.05463	35.86	2.07125	0.609767
35.88	6.08795	1.03831	35.88	2.0151	0.81414
35.9	5.92979	1.10592	35.9	2.02307	0.823922
35.92	5.80447	0.953882	35.92	1.94043	0.985419
35.94	5.81906	0.999593	35.94	2.09782	0.544993
35.96	5.84142	1.09915	35.96	1.99455	0.767864
35.98	5.85321	1.07098	35.98	1.95507	0.674674
36	5.8341	1.01941	36	2.02886	0.817133
36.02	5.7852	0.820756	36.02	1.97599	1.10852
36.04	5.63895	0.707427	36.04	1.9576	0.953113
36.06	5.75307	0.616076	36.06	2.04541	0.946571
36.08	5.82877	0.774377	36.08	1.92456	0.814188
36.1	5.88315	0.635149	36.1	1.95138	0.849133
36.12	5.849	0.974824	36.12	1.92073	0.994819
36.14	5.82883	1.0623	36.14	1.91209	0.868942
36.16	5.80133	0.958447	36.16	2.00023	0.931345
36.18	5.9517	0.791282	36.18	2.08879	0.943282
36.2	5.67619	1.03889	36.2	2.11022	1.00617
36.22	5.86177	0.764579	36.22	2.09523	1.01818
36.24	5.75515	0.647696	36.24	2.03384	1.07131
36.26	5.8302	1.04826	36.26	1.91866	1.01357
36.28	5.8761	0.721263	36.28	1.9427	0.650465
36.3	5.8831	1.01118	36.3	1.84273	0.662487
36.32	5.87756	1.1011	36.32	1.8851	0.770054
36.34	5.91676	1.03689	36.34	1.87602	1.07998
36.36	5.89847	1.05268	36.36	1.78795	0.999587
36.38	5.79924	0.64639	36.38	1.79771	0.928695
36.4	6.02133	0.999967	36.4	1.88769	1.13312
36.42	5.88597	1.03408	36.42	1.83687	0.89507
36.44	5.81542	0.709617	36.44	1.75714	1.19316
36.46	5.746	1.0877	36.46	1.80029	1.14098
36.48	5.83598	1.09422	36.48	1.82551	0.988662
36.5	5.83014	1.12973	36.5	1.80057	1.09202
36.52	5.84659	1.11357	36.52	1.90402	1.04675
36.54	5.74562	0.764344	36.54	1.78465	1.02507
36.56	5.63871	0.701428	36.56	1.97369	1.01765
36.58	5.84076	0.796151	36.58	1.8683	0.966029
36.6	5.75865	0.921162	36.6	1.88194	1.04511
36.62	5.79123	0.718818	36.62	1.86086	0.914992
36.64	5.72618	0.759473	36.64	1.81566	0.875383
36.66	5.68986	0.838673	36.66	1.78936	1.0346
36.68	5.56661	0.775506	36.68	1.79279	0.860103
36.7	5.59069	0.791368	36.7	1.70909	1.02708
36.72	5.58212	1.04253	36.72	1.78234	0.9795
36.74	5.64156	1.03889	36.74	1.84141	0.99624
36.76	5.64669	0.884036	36.76	1.79052	0.939865
36.78	5.60311	0.740995	36.78	1.8266	1.04538
36.8	5.64103	0.611853	36.8	1.78578	0.947473
36.82	5.69062	0.818131	36.82	1.7955	0.986515
36.84	5.71609	0.807849	36.84	1.80212	1.0346
36.86	5.80161	0.897024	36.86	1.82362	0.976066
36.88	5.60942	1.02896	36.88	1.73521	1.00249
36.9	5.62862	0.980621	36.9	1.84576	0.994963
36.92	5.72354	1.01975	36.92	1.83468	0.999364
36.94	5.76567	1.08441	36.94	1.82374	0.857445
36.96	5.7515	0.819527	36.96	1.90448	0.957558
36.98	5.70792	0.838747	36.98	1.89331	0.983762
37	5.75792	0.780304	37	1.83825	0.968846
37.02	5.63331	0.817586	37.02	1.91794	0.743732
37.04	5.82956	0.817925	37.04	1.91855	1.07143
37.06	5.89533	0.846696	37.06	1.95332	0.969441
37.08	5.71886	1.00547	37.08	1.8811	0.990017
37.1	5.66624	1.00356	37.1	1.86944	1.01481
37.12	5.66628	1.15009	37.12	1.82678	0.95881
37.14	5.79773	0.924791	37.14	1.92738	1.00498
37.16	5.69525	1.10157	37.16	1.91821	0.926388
37.18	5.73869	0.918286	37.18	1.89032	1.06728
37.2	5.70565	1.00463	37.2	1.845	0.931564
37.22	5.81614	1.05443	37.22	1.78445	0.962223
37.24	5.69037	1.0378	37.24	1.85204	0.917695
37.26	5.69146	1.05485	37.26	1.87427	0.99126
37.28	5.8034	0.81576	37.28	1.84062	1.04726
37.3	5.75566	0.827916	37.3	1.77288	1.00707
37.32	5.83447	0.862881	37.32	1.79302	0.996328
37.34	5.94919	1.04456	37.34	1.72165	1.05265
37.36	5.9011	1.04259	37.36	1.84044	1.09273
37.38	5.84391	1.10229	37.38	1.79572	0.972199
37.4	6.05801	1.10899	37.4	1.8336	1.039
37.42	5.99954	0.822174	37.42	1.8749	0.990173
37.44	5.83719	0.787774	37.44	1.91307	0.996288
37.46	5.84903	0.867044	37.46	1.91693	1.06164
37.48	5.98757	0.861674	37.48	1.96851	1.00157
37.5	5.90724	1.08571	37.5	1.86709	1.06103
37.52	6.06537	0.996956	37.52	1.89774	1.066
37.54	6.08287	1.09184	37.54	1.93002	0.973465
37.56	6.06671	0.727099	37.56	1.8851	0.982137
37.58	6.02448	0.933364	37.58	1.79103	0.919956
37.6	6.01146	0.779423	37.6	1.91204	0.93489
37.62	6.02979	0.66376	37.62	2.00241	0.948548
37.64	5.98101	0.732731	37.64	1.89589	1.06543
37.66	5.88025	1.0236	37.66	1.8663	1.02326
37.68	5.94754	0.994483	37.68	1.88037	1.0757
37.7	5.82453	0.848376	37.7	1.88994	1.0905
37.72	5.82686	0.92206	37.72	1.8378	0.999337
37.74	5.85189	0.851214	37.74	1.79714	0.864218
37.76	5.88054	0.663761	37.76	1.84063	0.987837
37.78	5.89188	0.637718	37.78	1.76904	1.12604
37.8	5.80773	1.03767	37.8	1.94327	0.972832
37.82	5.89995	1.01612	37.82	1.82638	0.957581
37.84	5.89876	0.648919	37.84	1.80868	0.958691
37.86	5.74779	0.687643	37.86	1.77927	1.09149
37.88	5.74327	0.928109	37.88	1.84117	1.00508
37.9	5.62213	0.709044	37.9	1.88874	0.99781
37.92	5.65076	0.672425	37.92	1.93104	0.943733
37.94	5.5753	0.752153	37.94	1.84332	0.968123
37.96	5.58505	0.890269	37.96	1.89313	0.870987
37.98	5.58094	0.647823	37.98	1.92345	0.966623
38	5.5037	0.798677	38	1.88092	0.883964
38.02	5.6279	0.914943	38.02	1.93847	0.856097
38.04	5.41861	0.812876	38.04	1.94431	0.879096
38.06	5.63076	0.791973	38.06	1.95272	0.890571
38.08	5.47979	0.704102	38.08	2.07157	0.721622
38.1	5.6227	1.12541	38.1	2.05052	0.870118
38.12	5.50284	0.866606	38.12	2.10464	1.01718
38.14	5.41263	1.07124	38.14	1.97671	0.835141
38.16	5.57878	0.809166	38.16	2.01675	0.928217
38.18	5.67874	1.0711	38.18	2.01191	1.00136
38.2	5.59376	0.980241	38.2	1.93094	0.873117
38.22	5.64913	0.693076	38.22	2.02319	1.05955
38.24	5.6026	0.778549	38.24	2.0566	0.836935
38.26	5.51614	0.721642	38.26	2.00436	0.940745
38.28	5.52239	0.685305	38.28	1.96047	0.632277
38.3	5.53678	0.611568	38.3	2.0094	0.603166
38.32	5.52021	0.882722	38.32	1.9562	0.440155
38.34	5.45658	0.769235	38.34	2.06546	0.470718
38.36	5.43466	1.12043	38.36	2.12062	0.87631
38.38	5.5602	1.11577	38.38	2.22274	1.02693
38.4	5.6796	1.11416	38.4	2.10082	0.926996
38.42	5.70849	0.993693	38.42	2.05141	1.03145
38.44	5.6545	0.946195	38.44	2.05146	0.994905
38.46	5.67492	0.742839	38.46	2.07705	0.943422
38.48	5.73151	1.10506	38.48	2.21237	0.853313
38.5	5.73741	1.15945	38.5	2.1466	0.733744
38.52	5.74965	0.867956	38.52	2.05308	1.18142
38.54	5.73683	0.70922	38.54	2.01468	1.01058
38.56	5.96188	0.877953	38.56	1.99116	1.03605
38.58	5.91586	0.988339	38.58	2.08007	1.01213
38.6	5.8714	0.736871	38.6	2.07412	1.09381
38.62	5.67248	1.02542	38.62	1.94951	1.02661
38.64	5.91598	0.866116	38.64	1.98384	1.01975
38.66	5.77368	1.08618	38.66	2.13576	0.785628
38.68	5.59966	1.00327	38.68	2.04643	1.06298
38.7	5.54852	1.04447	38.7	2.14626	0.865628
38.72	5.53935	1.12464	38.72	2.17899	1.03386
38.74	5.48622	1.02988	38.74	2.14249	1.03063
38.76	5.66143	1.09203	38.76	2.0211	1.00324
38.78	5.44058	1.08254	38.78	2.06065	0.961815
38.8	5.42966	0.99664	38.8	2.09826	1.1046
38.82	5.35741	0.864925	38.82	2.07531	0.950228
38.84	5.27159	1.1639	38.84	1.99189	1.01606
38.86	5.37652	1.04687	38.86	2.09157	0.933454
38.88	5.20291	0.965611	38.88	2.10815	0.969145
38.9	5.27053	0.959234	38.9	1.98861	0.90887
38.92	5.29126	1.07888	38.92	2.1155	0.799888
38.94	5.16716	1.01257	38.94	2.0246	0.988821
38.96	5.12009	1.11427	38.96	2.0308	0.938518
38.98	5.01814	1.0908	38.98	1.99598	0.964658
39	5.06302	1.02891	39	1.93218	1.04426
39.02	5.0874	1.02347	39.02	1.86332	0.941082
39.04	5.16824	0.890137	39.04	1.93564	0.968781
39.06	5.29942	0.899	39.06	2.00622	0.765401
39.08	5.18726	0.871005	39.08	2.11253	0.736524
39.1	5.12296	1.04881	39.1	2.08555	0.655114
39.12	5.11539	0.966538	39.12	2.06121	0.845987
39.14	5.09707	1.07303	39.14	1.96859	0.850282
39.16	5.17578	0.821513	39.16	2.01463	0.572647
39.18	5.21122	0.643682	39.18	2.12068	0.604747
39.2	5.22099	0.722892	39.2	2.10836	0.625486
39.22	5.29393	0.674186	39.22	1.99198	0.830338
39.24	5.33004	1.07644	39.24	1.98771	0.880975
39.26	5.27114	0.917243	39.26	1.91852	0.739509
39.28	5.25929	0.856031	39.28	2.0898	0.683741
39.3	5.25744	0.749771	39.3	2.04468	1.13146
39.32	5.26976	1.11763	39.32	1.99301	1.00886
39.34	5.24993	0.921663	39.34	2.03119	0.91922
39.36	5.17719	0.844107	39.36	2.00112	0.980946
39.38	5.0919	0.709128	39.38	2.05976	0.855514
39.4	5.21129	0.763592	39.4	1.95319	0.945823
39.42	5.27743	0.769957	39.42	1.96871	0.995843
39.44	5.2639	0.621149	39.44	1.88677	0.963771
39.46	5.31058	0.798778	39.46	1.90308	0.837156
39.48	5.25125	0.846281	39.48	1.87968	0.871684
39.5	5.30487	0.762314	39.5	1.915	0.996529
39.52	5.25346	0.724176	39.52	2.05214	0.946336
39.54	5.38527	0.669061	39.54	1.81671	0.879624
39.56	5.3732	0.710356	39.56	1.95114	0.963678
39.58	5.52252	0.678336	39.58	1.88557	0.998184
39.6	5.40925	0.794963	39.6	1.87154	0.980993
39.62	5.423	0.726764	39.62	1.90743	0.965312
39.64	5.44659	0.776124	39.64	1.92771	0.86151
39.66	5.55608	0.834849	39.66	1.84636	0.921643
39.68	5.70722	0.873468	39.68	1.86122	0.888738
39.7	5.5688	0.747963	39.7	1.93784	0.649866
39.72	5.38333	0.866937	39.72	1.92708	0.695289
39.74	5.25088	0.868604	39.74	2.05701	0.447195
39.76	5.3201	0.981729	39.76	1.99021	0.648038
39.78	5.2086	1.02935	39.78	2.00493	0.591549
39.8	5.15313	0.907543	39.8	2.03676	0.662038
39.82	5.24324	1.03736	39.82	1.95663	0.620264
39.84	5.23293	1.12879	39.84	1.98478	0.615236
39.86	5.17343	1.08993	39.86	1.98694	0.646525
39.88	5.10605	0.966084	39.88	1.85461	0.731754
39.9	5.21937	1.04279	39.9	1.76403	0.401277
39.92	5.44121	1.02522	39.92	1.8796	0.517171
39.94	5.55411	1.052	39.94	1.85965	0.623829
39.96	5.5448	0.971613	39.96	1.84303	0.471695
39.98	5.62847	1.00614	39.98	1.86558	0.779206
[truncated: 502 more rows]

## Sheet: isavuconazole
Time (ns)	protein_ARG1	LIG_Isavuconazole	Time (ns)	protein_ARG2	LIG_Isavuconazole
0.02	0.917666	0.582954	0.02	0.708359	0.484856
0.04	0.974057	1.10961	0.04	0.758658	0.576067
0.06	1.14269	0.650964	0.06	0.817225	0.825554
0.08	1.22535	0.586965	0.08	0.834512	0.923819
0.1	1.38021	0.5623	0.1	0.987465	0.585124
0.12	1.35299	1.13002	0.12	1.04622	0.52462
0.14	1.42185	1.22582	0.14	1.08816	0.577894
0.16	1.36729	1.02834	0.16	1.07359	0.512662
0.18	1.33815	0.892594	0.18	1.04417	0.855724
0.2	1.41297	0.861059	0.2	1.13592	0.549766
0.22	1.50659	0.944201	0.22	1.13796	0.755458
0.24	1.57524	1.00265	0.24	1.10211	0.8054
0.26	1.47309	0.964042	0.26	1.09429	0.762822
0.28	1.33639	0.982925	0.28	1.14125	0.789229
0.3	1.50875	1.01648	0.3	1.10984	0.943332
0.32	1.55242	1.00473	0.32	1.28287	0.758763
0.34	1.56961	1.00327	0.34	1.20257	0.7517
0.36	1.76954	0.957659	0.36	1.25281	0.641265
0.38	1.92038	0.920955	0.38	1.17331	0.739421
0.4	1.97202	0.88726	0.4	1.1816	0.925228
0.42	1.74705	0.970679	0.42	1.20543	0.719543
0.44	1.83149	1.1213	0.44	1.27493	0.942696
0.46	1.9024	0.938407	0.46	1.14173	0.861428
0.48	1.83514	0.95543	0.48	1.15928	0.879908
0.5	2.08681	0.959543	0.5	1.1481	0.919139
0.52	2.1107	1.07799	0.52	1.34167	0.731268
0.54	2.36204	1.03203	0.54	1.30103	0.93093
0.56	2.07452	1.20695	0.56	1.29564	0.888776
0.58	2.05967	1.40994	0.58	1.33473	0.806354
0.6	2.26549	1.09317	0.6	1.24648	0.876859
0.62	2.2236	1.08139	0.62	1.2981	0.854236
0.64	2.30944	1.00783	0.64	1.31594	0.746064
0.66	1.98529	1.0011	0.66	1.22921	0.838975
0.68	1.95217	0.903432	0.68	1.25562	0.893157
0.7	1.88856	0.92588	0.7	1.38019	0.984877
0.72	1.77144	0.96716	0.72	1.41575	1.10417
0.74	1.87783	1.15044	0.74	1.32115	0.882185
0.76	1.66099	0.955097	0.76	1.25369	0.867879
0.78	1.55984	1.12481	0.78	1.29489	0.856293
0.8	1.74325	1.07388	0.8	1.29397	1.0888
0.82	1.67542	0.56149	0.82	1.32435	0.811448
0.84	1.54604	0.549432	0.84	1.32074	0.967521
0.86	1.57643	0.806488	0.86	1.37307	0.88029
0.88	1.57187	0.624168	0.88	1.32632	0.847943
0.9	1.77831	0.607165	0.9	1.34509	0.803988
0.92	1.79358	0.387974	0.92	1.34037	0.980501
0.94	1.99286	0.422772	0.94	1.31693	0.882745
0.96	2.013	0.361414	0.96	1.37457	1.38105
0.98	1.84584	0.424339	0.98	1.42643	0.811256
1	1.74251	0.851328	1	1.40111	0.780316
1.02	1.82616	0.319493	1.02	1.41873	0.792462
1.04	1.66525	0.653823	1.04	1.39827	0.754857
1.06	1.77175	0.51883	1.06	1.27614	0.798721
1.08	1.65181	0.852244	1.08	1.38497	0.757055
1.1	1.80209	1.08531	1.1	1.4852	1.09702
1.12	1.69338	1.1865	1.12	1.37502	0.780962
1.14	1.61561	1.08171	1.14	1.34955	0.719394
1.16	1.70239	0.502555	1.16	1.32436	0.804736
1.18	1.72519	0.629637	1.18	1.34127	0.873302
1.2	1.75192	0.565664	1.2	1.34281	0.865424
1.22	1.68877	0.535511	1.22	1.41598	0.753787
1.24	1.63951	0.596349	1.24	1.36891	1.38438
1.26	1.62099	0.882589	1.26	1.51841	1.26652
1.28	1.59892	0.996911	1.28	1.46357	1.23059
1.3	1.7025	1.23387	1.3	1.47253	1.33485
1.32	1.67729	0.878762	1.32	1.46725	0.943265
1.34	1.51831	0.76021	1.34	1.42789	0.949348
1.36	1.60306	1.30654	1.36	1.55573	0.966971
1.38	1.66477	0.7758	1.38	1.46256	0.758381
1.4	1.72043	0.877208	1.4	1.43853	0.892029
1.42	1.73491	0.727708	1.42	1.52377	0.974742
1.44	1.79129	0.974763	1.44	1.53118	0.905442
1.46	1.86672	0.605329	1.46	1.61244	0.902408
1.48	1.72142	0.78118	1.48	1.51536	0.941254
1.5	1.88857	0.789046	1.5	1.52071	0.926882
1.52	1.74596	1.00198	1.52	1.51893	0.914899
1.54	1.79849	1.08589	1.54	1.57182	0.757932
1.56	1.74826	1.28877	1.56	1.48537	0.75543
1.58	1.68478	1.371	1.58	1.36729	1.56951
1.6	1.61898	1.425	1.6	1.53288	1.62555
1.62	1.83515	1.57564	1.62	1.4594	1.50157
1.64	1.84623	1.53132	1.64	1.40689	1.32173
1.66	1.81292	1.25937	1.66	1.52388	1.60707
1.68	1.80842	1.30697	1.68	1.53323	1.73578
1.7	1.68441	1.42139	1.7	1.46347	1.5429
1.72	1.80421	1.49409	1.72	1.4873	1.57541
1.74	1.78947	1.51758	1.74	1.49588	1.65399
1.76	1.68132	1.24855	1.76	1.49319	1.43287
1.78	1.67123	0.995668	1.78	1.49033	1.64904
1.8	1.79531	1.21017	1.8	1.47829	1.5493
1.82	1.83252	1.12864	1.82	1.42792	1.59799
1.84	1.83201	1.19607	1.84	1.41094	1.61163
1.86	1.88381	1.06725	1.86	1.50139	1.74223
1.88	2.10693	1.17549	1.88	1.40898	1.61806
1.9	2.09461	1.25764	1.9	1.43182	1.66415
1.92	1.97043	1.30047	1.92	1.52658	1.6273
1.94	1.99729	0.918012	1.94	1.57407	1.69035
1.96	1.90716	1.09459	1.96	1.49086	1.61285
1.98	1.97755	1.10311	1.98	1.45181	1.67694
2	2.1418	1.15682	2	1.50057	1.68625
2.02	2.16894	1.02732	2.02	1.57461	1.65661
2.04	2.08786	0.987416	2.04	1.41067	1.64071
2.06	2.1571	0.634762	2.06	1.42605	1.69787
2.08	2.19304	0.554692	2.08	1.46481	1.72359
2.1	2.22432	0.949534	2.1	1.41592	1.49993
2.12	2.25532	0.909148	2.12	1.43602	1.66608
2.14	2.41945	1.03646	2.14	1.42544	1.58271
2.16	2.48882	0.941951	2.16	1.33141	1.64568
2.18	2.4829	0.896519	2.18	1.31948	1.65989
2.2	2.61244	0.681081	2.2	1.29306	1.69006
2.22	2.68453	1.05543	2.22	1.32966	1.66631
2.24	2.70621	1.05002	2.24	1.34435	1.68408
2.26	2.8187	1.16302	2.26	1.42842	1.63218
2.28	2.82672	1.32308	2.28	1.43268	1.72583
2.3	2.94031	1.4623	2.3	1.37565	1.6556
2.32	2.78313	1.58705	2.32	1.38458	1.60753
2.34	2.66022	1.0482	2.34	1.42961	1.67507
2.36	2.489	1.05909	2.36	1.44606	1.62118
2.38	2.5789	0.946635	2.38	1.40222	1.65694
2.4	2.64484	0.865674	2.4	1.37174	1.63974
2.42	2.80636	0.829925	2.42	1.38027	1.65089
2.44	2.84444	1.05827	2.44	1.33641	1.69283
2.46	2.83131	1.14049	2.46	1.41541	1.63944
2.48	2.92868	1.12302	2.48	1.36762	1.75065
2.5	3.01319	1.05798	2.5	1.43812	1.66023
2.52	2.97461	1.71523	2.52	1.34482	1.70347
2.54	3.1055	1.75516	2.54	1.45873	1.65228
2.56	3.03019	1.86068	2.56	1.47902	1.61382
2.58	2.78412	1.71517	2.58	1.51601	1.54073
2.6	2.89108	1.90571	2.6	1.50637	1.63068
2.62	3.02555	1.77921	2.62	1.59226	1.64583
2.64	3.0165	1.6967	2.64	1.43877	1.63386
2.66	2.77011	1.61365	2.66	1.48697	1.63313
2.68	2.65304	1.6369	2.68	1.534	1.60794
2.7	2.73536	1.79423	2.7	1.4191	1.55154
2.72	2.57549	1.74137	2.72	1.4078	1.57702
2.74	2.75778	1.71997	2.74	1.45873	1.5691
2.76	2.68189	1.73951	2.76	1.53424	1.60332
2.78	2.48582	1.72958	2.78	1.43771	1.61491
2.8	2.72389	1.71459	2.8	1.5165	1.64809
2.82	2.60884	1.66417	2.82	1.40749	1.65302
2.84	2.78801	1.70543	2.84	1.38893	1.66273
2.86	2.55262	1.78272	2.86	1.3449	1.66054
2.88	2.5508	1.65458	2.88	1.33055	1.72261
2.9	2.42241	1.71773	2.9	1.38875	1.7676
2.92	2.34697	1.7544	2.92	1.42926	1.64301
2.94	2.54018	1.74067	2.94	1.38291	1.6928
2.96	2.42197	1.76603	2.96	1.44755	1.6145
2.98	2.37283	1.74735	2.98	1.41293	1.69093
3	2.47243	1.63911	3	1.43594	1.65861
3.02	2.49013	1.51056	3.02	1.43495	1.67131
3.04	2.80993	1.65598	3.04	1.46016	1.5926
3.06	2.78543	1.63145	3.06	1.41103	1.64573
3.08	3.24294	1.74581	3.08	1.44476	1.58618
3.1	3.1731	1.69574	3.1	1.55846	1.65251
3.12	3.29463	1.74454	3.12	1.5183	1.63913
3.14	3.36949	1.72886	3.14	1.52271	1.63449
3.16	3.42669	1.58797	3.16	1.49695	1.66313
3.18	3.32533	1.41599	3.18	1.51266	1.67174
3.2	3.21219	1.52522	3.2	1.47079	0.931122
3.22	3.0738	1.54814	3.22	1.47464	0.937685
3.24	3.34336	1.61557	3.24	1.44585	0.938309
3.26	3.4018	1.58628	3.26	1.4746	0.843732
3.28	3.56008	1.6288	3.28	1.50566	0.877674
3.3	3.68261	1.67324	3.3	1.59713	0.859841
3.32	3.56886	1.67031	3.32	1.49206	0.846979
3.34	3.71653	1.71045	3.34	1.60757	0.748163
3.36	3.67988	1.73084	3.36	1.57044	1.01474
3.38	3.70844	1.88293	3.38	1.52467	0.893213
3.4	3.65661	1.62986	3.4	1.54489	0.851168
3.42	3.7079	1.72456	3.42	1.48836	0.897424
3.44	3.59048	1.77571	3.44	1.54076	0.933292
3.46	3.53361	1.74698	3.46	1.60805	0.748674
3.48	3.59123	1.69128	3.48	1.53285	0.821774
3.5	3.4728	1.65365	3.5	1.62583	0.751336
3.52	3.40489	1.60835	3.52	1.48105	0.817016
3.54	3.29868	1.62964	3.54	1.53934	0.899551
3.56	3.20385	1.65134	3.56	1.49375	0.939948
3.58	3.39846	1.77487	3.58	1.62505	0.728084
3.6	3.17163	1.69536	3.6	1.60599	0.861267
3.62	3.07877	1.63731	3.62	1.49888	0.994391
3.64	3.01197	1.62692	3.64	1.48178	0.983714
3.66	3.07574	1.67914	3.66	1.42167	0.77494
3.68	3.05388	1.65013	3.68	1.57559	0.782314
3.7	3.05947	1.67825	3.7	1.49126	0.989711
3.72	2.92333	1.6788	3.72	1.55993	0.779295
3.74	2.95865	1.68886	3.74	1.49345	0.968955
3.76	3.07486	1.65732	3.76	1.4846	0.903989
3.78	3.22987	1.68393	3.78	1.43278	0.845527
3.8	3.46936	1.58512	3.8	1.46852	0.888386
3.82	3.5521	1.22826	3.82	1.58529	0.864194
3.84	3.61963	1.24013	3.84	1.50824	0.882193
3.86	3.56498	1.5987	3.86	1.46539	0.818745
3.88	3.32252	1.5397	3.88	1.5754	0.789601
3.9	3.1222	1.16624	3.9	1.46701	0.90666
3.92	2.87542	0.789002	3.92	1.44764	0.81061
3.94	3.01603	0.774202	3.94	1.53897	0.875708
3.96	3.02802	1.03229	3.96	1.49901	0.800257
3.98	3.07066	0.954274	3.98	1.44959	0.702456
4	3.24316	0.885189	4	1.55169	0.711906
4.02	3.0653	0.867968	4.02	1.55374	0.818192
4.04	3.04152	1.05716	4.04	1.55156	0.943021
4.06	2.84801	1.00517	4.06	1.51943	0.951301
4.08	2.86118	0.995591	4.08	1.51786	0.97423
4.1	2.95953	1.05394	4.1	1.58606	0.768268
4.12	3.00554	1.06158	4.12	1.50237	0.85168
4.14	2.85553	0.939506	4.14	1.62656	0.827076
4.16	3.14249	1.01682	4.16	1.58281	0.865372
4.18	3.21475	1.00029	4.18	1.40324	0.996063
4.2	2.98672	1.15308	4.2	1.47294	0.980523
4.22	2.95651	1.01922	4.22	1.5368	0.977058
4.24	2.8528	1.02903	4.24	1.4783	0.932452
4.26	2.69618	0.988079	4.26	1.58213	1.01492
4.28	2.91296	1.00571	4.28	1.45639	1.0785
4.3	2.93991	0.972045	4.3	1.47975	0.912278
4.32	3.05621	1.15098	4.32	1.43294	0.958929
4.34	3.04434	1.23404	4.34	1.43213	0.933715
4.36	3.14883	1.06242	4.36	1.35892	0.914031
4.38	3.11959	0.622807	4.38	1.4256	0.872256
4.4	3.03034	1.02875	4.4	1.43327	0.944333
4.42	3.17761	0.944153	4.42	1.44052	0.828245
4.44	3.14595	0.991537	4.44	1.48114	0.967801
4.46	3.10643	0.963345	4.46	1.42371	0.861207
4.48	3.13421	1.00709	4.48	1.54095	0.967329
4.5	2.92481	1.04528	4.5	1.44464	1.07912
4.52	2.94588	1.08809	4.52	1.51363	0.874217
4.54	2.80289	1.02553	4.54	1.4217	0.980892
4.56	2.86236	1.07365	4.56	1.4466	0.98363
4.58	2.70226	1.03355	4.58	1.51224	0.872686
4.6	2.60859	0.937324	4.6	1.48977	0.891424
4.62	2.75788	1.06701	4.62	1.38917	1.01477
4.64	2.67888	0.984942	4.64	1.40082	0.865454
4.66	2.78534	0.961434	4.66	1.41989	0.953164
4.68	2.5796	1.04757	4.68	1.38114	0.936859
4.7	2.69567	1.0545	4.7	1.35903	0.864248
4.72	2.4991	0.99463	4.72	1.42103	0.902682
4.74	2.46283	0.933892	4.74	1.42909	1.01641
4.76	2.39898	1.00672	4.76	1.48784	0.984674
4.78	2.4958	0.966244	4.78	1.43564	1.01352
4.8	2.42161	0.944501	4.8	1.40835	0.887741
4.82	2.73105	1.07526	4.82	1.44427	0.999324
4.84	2.61345	1.07643	4.84	1.55415	1.03301
4.86	2.71281	1.13707	4.86	1.47316	0.969759
4.88	2.86385	1.06924	4.88	1.50369	1.06457
4.9	2.74116	1.08959	4.9	1.55415	0.903908
4.92	2.94509	1.05172	4.92	1.41044	1.02564
4.94	2.98492	1.01745	4.94	1.41965	0.844976
4.96	2.86938	0.994899	4.96	1.40248	0.850898
4.98	2.66104	0.928271	4.98	1.49204	0.882664
5	2.76685	1.02367	5	1.54546	1.11633
5.02	2.84897	1.07766	5.02	1.52204	0.907608
5.04	2.74532	0.889888	5.04	1.53118	1.25974
5.06	2.68034	1.08691	5.06	1.42903	0.861777
5.08	2.66933	1.01775	5.08	1.41756	0.919366
5.1	2.69758	1.06483	5.1	1.42334	1.08395
5.12	2.64103	1.02502	5.12	1.48053	0.746279
5.14	2.5303	1.66329	5.14	1.46484	1.00931
5.16	2.54308	1.63901	5.16	1.42295	0.876719
5.18	2.56126	1.57565	5.18	1.43999	0.875272
5.2	2.46142	1.44162	5.2	1.4665	0.89277
5.22	2.59451	1.04081	5.22	1.41573	0.893043
5.24	2.56582	0.822105	5.24	1.43764	0.78576
5.26	2.56063	1.06811	5.26	1.45255	0.810199
5.28	2.33441	1.29309	5.28	1.38614	0.852268
5.3	2.33293	1.40155	5.3	1.35049	0.777433
5.32	2.48258	1.83681	5.32	1.41089	0.978704
5.34	2.42573	1.33706	5.34	1.39931	0.965187
5.36	2.43187	1.34483	5.36	1.45251	0.867543
5.38	2.30376	1.72578	5.38	1.39164	0.786202
5.4	2.46278	1.12993	5.4	1.36272	1.45918
5.42	2.47561	1.1536	5.42	1.39046	0.795729
5.44	2.45812	1.40607	5.44	1.40551	0.82682
5.46	2.55331	1.59307	5.46	1.46355	0.915086
5.48	2.4422	1.42204	5.48	1.44865	0.796245
5.5	2.29718	0.943071	5.5	1.439	1.05331
5.52	2.52964	1.06538	5.52	1.43887	0.845591
5.54	2.59993	1.28064	5.54	1.4437	0.933296
5.56	2.70532	0.962701	5.56	1.40673	0.858883
5.58	2.74646	1.02152	5.58	1.42472	1.09775
5.6	2.76401	1.70761	5.6	1.34139	1.01422
5.62	2.87919	1.70523	5.62	1.41266	0.887118
5.64	2.90764	1.50345	5.64	1.40382	0.880484
5.66	2.87755	1.31243	5.66	1.38666	1.06008
5.68	2.82893	1.4596	5.68	1.45513	0.818292
5.7	2.74901	1.46838	5.7	1.43243	0.903049
5.72	2.7233	1.75296	5.72	1.39563	0.861879
5.74	2.75925	1.22758	5.74	1.34958	0.834828
5.76	2.84282	1.18191	5.76	1.36354	0.85203
5.78	2.99128	1.0835	5.78	1.46616	0.884246
5.8	2.76308	0.95668	5.8	1.47446	0.830389
5.82	2.90631	1.70798	5.82	1.39573	0.812859
5.84	2.99487	1.50649	5.84	1.34868	0.756394
5.86	2.75695	1.44344	5.86	1.41116	0.96986
5.88	2.9185	1.6543	5.88	1.3666	0.925835
5.9	2.80289	1.63199	5.9	1.36954	0.837754
5.92	2.85176	1.68108	5.92	1.33974	0.873928
5.94	2.7437	1.67551	5.94	1.3994	0.830229
5.96	2.63006	1.63744	5.96	1.39321	0.827432
5.98	2.64581	1.68143	5.98	1.39974	0.942373
6	2.6105	1.0494	6	1.41274	0.805749
6.02	2.57737	1.06438	6.02	1.3922	0.940983
6.04	2.60596	1.12115	6.04	1.44431	0.903362
6.06	2.62958	0.761443	6.06	1.37559	0.874499
6.08	2.63829	0.708443	6.08	1.44936	0.867464
6.1	2.72329	1.26981	6.1	1.41438	0.825831
6.12	2.71536	1.27101	6.12	1.51728	0.963435
6.14	2.77139	0.718404	6.14	1.36917	0.784688
6.16	2.81943	0.721883	6.16	1.4091	0.846545
6.18	2.8169	1.19385	6.18	1.40915	0.6853
6.2	2.90547	1.30118	6.2	1.41939	0.792788
6.22	2.80566	1.04808	6.22	1.37262	0.979204
6.24	2.78314	1.26222	6.24	1.37555	0.939405
6.26	2.89413	1.10341	6.26	1.49789	0.928918
6.28	2.82618	1.02274	6.28	1.43994	1.02401
6.3	2.95845	1.14342	6.3	1.39681	0.844651
6.32	2.82221	1.19859	6.32	1.43737	0.856575
6.34	2.87352	0.945543	6.34	1.47261	0.898997
6.36	2.85983	1.12766	6.36	1.41204	0.969438
6.38	2.83513	1.25916	6.38	1.41264	0.961172
6.4	2.95059	1.34214	6.4	1.40036	1.48618
6.42	2.87337	1.33319	6.42	1.3773	0.8829
6.44	2.82846	1.55469	6.44	1.36205	0.875275
6.46	2.70911	1.79595	6.46	1.35606	0.870915
6.48	2.57333	1.49904	6.48	1.5004	0.785344
6.5	2.64164	1.31202	6.5	1.47875	0.951138
6.52	2.64751	0.807261	6.52	1.48019	0.743182
6.54	2.67709	1.53137	6.54	1.3893	0.934799
6.56	2.69052	1.19376	6.56	1.41355	0.801564
6.58	2.70212	1.14235	6.58	1.40506	0.903794
6.6	2.57592	1.39361	6.6	1.36933	0.798424
6.62	2.64792	1.81109	6.62	1.35187	0.778117
6.64	2.47579	1.61414	6.64	1.41111	0.930105
6.66	2.567	1.39195	6.66	1.36904	0.860021
6.68	2.54938	1.43954	6.68	1.42697	0.774462
6.7	2.49044	1.8733	6.7	1.38031	0.878424
6.72	2.5428	1.65933	6.72	1.3901	0.94599
6.74	2.75956	2.1836	6.74	1.33552	0.769181
6.76	2.63537	2.5546	6.76	1.42795	0.875794
6.78	2.86975	2.49097	6.78	1.44292	0.884326
6.8	2.75065	2.59089	6.8	1.37922	0.920491
6.82	2.70385	2.58208	6.82	1.44063	0.737905
6.84	2.7032	2.44392	6.84	1.3315	0.874206
6.86	2.61253	2.42692	6.86	1.40722	0.781716
6.88	2.73886	2.59236	6.88	1.37032	0.921231
6.9	2.63495	2.76875	6.9	1.37367	0.842095
6.92	2.70958	2.59727	6.92	1.38802	0.923763
6.94	2.76744	2.7906	6.94	1.39043	1.14533
6.96	2.79021	2.71643	6.96	1.37067	0.989974
6.98	2.74493	2.50542	6.98	1.36424	0.82769
7	2.7191	2.58031	7	1.30031	0.956842
7.02	2.84679	2.68398	7.02	1.36258	0.749932
7.04	2.69611	2.71071	7.04	1.31753	0.859123
7.06	2.80453	2.58672	7.06	1.39063	0.7769
7.08	2.88555	2.55261	7.08	1.3663	0.937978
7.1	2.90579	2.55746	7.1	1.40703	0.775264
7.12	2.83998	2.28775	7.12	1.29587	0.807707
7.14	2.79245	2.6741	7.14	1.3382	0.776984
7.16	2.87155	2.61208	7.16	1.39401	0.733089
7.18	2.99791	2.61788	7.18	1.27304	0.698287
7.2	2.89719	2.73949	7.2	1.31454	0.771065
7.22	2.89163	2.45802	7.22	1.31302	0.782607
7.24	2.69887	2.56803	7.24	1.36602	0.793842
7.26	2.72998	2.68707	7.26	1.32383	0.706314
7.28	2.60781	2.46803	7.28	1.35653	0.788215
7.3	2.69885	2.61249	7.3	1.51735	0.786731
7.32	2.72859	2.79971	7.32	1.39775	0.827403
7.34	2.61196	2.60833	7.34	1.41151	1.22588
7.36	2.66502	2.45331	7.36	1.46062	0.781207
7.38	2.613	2.55223	7.38	1.39596	0.648059
7.4	2.75291	2.34961	7.4	1.38665	0.736272
7.42	2.63875	2.36153	7.42	1.40662	0.89907
7.44	2.71617	2.31308	7.44	1.42532	0.64418
7.46	2.63023	2.42743	7.46	1.377	0.928931
7.48	2.56932	2.47526	7.48	1.4501	1.06605
7.5	2.61788	2.58108	7.5	1.48007	0.777517
7.52	2.66037	2.36393	7.52	1.4968	0.888631
7.54	2.64195	2.48798	7.54	1.49029	0.859724
7.56	2.71325	2.75543	7.56	1.41145	0.968612
7.58	2.69826	2.46423	7.58	1.49222	1.01184
7.6	2.63289	2.35495	7.6	1.38995	0.943306
7.62	2.51871	2.7243	7.62	1.33843	0.899314
7.64	2.55836	2.36316	7.64	1.39631	0.845794
7.66	2.58768	2.49746	7.66	1.37978	0.805586
7.68	2.53615	2.40439	7.68	1.4405	0.993867
7.7	2.59557	2.22955	7.7	1.40933	0.851575
7.72	2.6126	2.47118	7.72	1.40777	0.829322
7.74	2.51147	2.32133	7.74	1.3916	0.940359
7.76	2.58585	2.22829	7.76	1.39674	0.878775
7.78	2.55292	2.54091	7.78	1.43671	0.826415
7.8	2.46992	2.41195	7.8	1.45177	0.926378
7.82	2.48695	2.31582	7.82	1.38666	0.881795
7.84	2.51733	2.49711	7.84	1.33792	1.1382
7.86	2.51285	2.36911	7.86	1.46762	0.936525
7.88	2.72183	2.42806	7.88	1.45119	0.836004
7.9	2.69012	2.35434	7.9	1.50122	0.935854
7.92	2.69583	2.5511	7.92	1.47155	1.07471
7.94	2.84338	2.31625	7.94	1.50886	0.970765
7.96	2.80607	2.36381	7.96	1.42751	0.735925
7.98	2.91705	2.49926	7.98	1.42012	0.871977
8	2.87999	2.31176	8	1.51095	0.896086
8.02	2.89465	2.39354	8.02	1.36345	0.856424
8.04	2.95513	2.30616	8.04	1.41843	0.898537
8.06	2.91628	2.43445	8.06	1.4409	0.917436
8.08	2.98223	2.4414	8.08	1.48468	0.802188
8.1	2.99169	2.32933	8.1	1.43605	0.854344
8.12	2.79147	2.29832	8.12	1.55085	0.870864
8.14	2.68727	2.36552	8.14	1.51333	0.87989
8.16	2.78628	2.50936	8.16	1.52458	0.905717
8.18	2.86983	2.38208	8.18	1.56391	0.936161
8.2	2.80587	2.41997	8.2	1.53533	0.865788
8.22	2.85101	2.37484	8.22	1.53644	0.86667
8.24	2.80916	2.34755	8.24	1.49047	0.905676
8.26	2.84622	2.46959	8.26	1.61513	0.916627
8.28	2.7684	2.46773	8.28	1.58336	1.09211
8.3	2.89947	2.55178	8.3	1.57671	0.823264
8.32	2.78002	2.39989	8.32	1.60302	0.912792
8.34	2.95027	2.53992	8.34	1.55754	0.871078
8.36	2.78319	2.71981	8.36	1.4992	0.898445
8.38	2.84943	2.55064	8.38	1.5515	1.13636
8.4	2.8678	2.77879	8.4	1.49514	1.2499
8.42	2.82321	2.75957	8.42	1.45499	1.25462
8.44	2.7638	2.42488	8.44	1.4792	1.37409
8.46	2.85055	2.53113	8.46	1.40404	1.26923
8.48	2.86451	2.5575	8.48	1.54202	1.19987
8.5	2.96642	2.35128	8.5	1.46146	1.0723
8.52	2.99447	2.19763	8.52	1.47402	0.879925
8.54	3.09182	2.24327	8.54	1.48854	0.794318
8.56	3.08565	2.22148	8.56	1.54647	1.16389
8.58	3.04549	2.30576	8.58	1.51752	0.971817
8.6	3.01332	2.29696	8.6	1.53195	1.02055
8.62	3.07734	2.56839	8.62	1.58907	0.977024
8.64	3.20261	2.34404	8.64	1.51798	0.822852
8.66	2.92418	2.53726	8.66	1.51631	0.933337
8.68	2.94437	2.28256	8.68	1.46614	1.0997
8.7	2.80976	2.41092	8.7	1.51471	1.27856
8.72	2.75961	2.48536	8.72	1.56513	0.913729
8.74	2.71715	2.46241	8.74	1.54129	0.838237
8.76	2.60847	2.17785	8.76	1.56309	0.958997
8.78	2.71356	2.40967	8.78	1.49177	0.854514
8.8	2.66648	2.51602	8.8	1.52845	0.909113
8.82	2.71776	2.40532	8.82	1.43606	0.808219
8.84	2.77351	2.31126	8.84	1.4711	0.966143
8.86	2.76	2.26503	8.86	1.40072	0.905085
8.88	2.72574	2.35494	8.88	1.47193	0.763045
8.9	2.71043	2.31943	8.9	1.41186	0.966552
8.92	2.77142	2.42871	8.92	1.41887	0.75419
8.94	2.79189	2.15526	8.94	1.4119	0.930491
8.96	2.8606	2.39621	8.96	1.43814	0.809972
8.98	2.9398	2.4247	8.98	1.38033	0.787518
9	2.94898	2.47326	9	1.41602	0.756429
9.02	2.96814	2.48046	9.02	1.42709	0.826724
9.04	2.8999	2.58206	9.04	1.42964	0.834662
9.06	2.85264	2.37281	9.06	1.34912	0.894268
9.08	2.73231	2.75492	9.08	1.38181	0.764115
9.1	2.67561	2.49198	9.1	1.40128	0.858637
9.12	2.69772	2.38863	9.12	1.39067	0.804587
9.14	2.68947	2.41293	9.14	1.43181	0.711879
9.16	2.63273	2.54561	9.16	1.38378	0.821608
9.18	2.96442	2.28362	9.18	1.35644	1.24123
9.2	2.92622	2.42612	9.2	1.35395	1.10677
9.22	2.94052	2.60382	9.22	1.36422	0.87479
9.24	2.87594	2.55795	9.24	1.42195	1.34308
9.26	2.88224	2.52132	9.26	1.39935	0.865008
9.28	3.17949	2.27459	9.28	1.36342	0.849315
9.3	3.01532	2.39383	9.3	1.34538	1.24474
9.32	2.79103	2.6254	9.32	1.39768	1.34177
9.34	2.84562	2.27682	9.34	1.45945	0.659571
9.36	2.79295	2.39077	9.36	1.42347	1.63338
9.38	2.79658	2.58853	9.38	1.39724	1.31624
9.4	2.95164	2.27151	9.4	1.38317	1.58852
9.42	2.95479	2.42053	9.42	1.3839	1.73884
9.44	2.86909	2.24198	9.44	1.33091	1.62366
9.46	3.06344	2.46642	9.46	1.33393	1.54678
9.48	3.37109	2.59231	9.48	1.38095	1.65803
9.5	3.26504	2.5588	9.5	1.34427	1.67053
9.52	3.12911	2.52911	9.52	1.3069	1.7146
9.54	3.04317	2.55609	9.54	1.41315	1.66368
9.56	2.93598	2.4071	9.56	1.43476	1.54184
9.58	2.9324	2.49453	9.58	1.36376	1.38764
9.6	3.12556	2.38593	9.6	1.41399	1.60167
9.62	3.03511	2.46361	9.62	1.45843	1.58185
9.64	3.08589	2.32144	9.64	1.41298	1.64171
9.66	3.05455	2.56085	9.66	1.33205	1.59219
9.68	3.13109	2.80955	9.68	1.40427	1.25989
9.7	3.04672	2.26038	9.7	1.38127	1.37809
9.72	3.06793	2.24495	9.72	1.47673	1.32299
9.74	2.91661	2.5781	9.74	1.45522	1.51229
9.76	2.87652	2.56339	9.76	1.47129	1.67822
9.78	2.89097	2.61542	9.78	1.46953	1.66412
9.8	2.90143	2.42648	9.8	1.50712	1.5836
9.82	2.96343	2.52611	9.82	1.46772	1.58937
9.84	3.08611	2.5015	9.84	1.40504	1.67659
9.86	3.10643	2.72138	9.86	1.38898	1.4788
9.88	2.92386	2.65059	9.88	1.41265	1.52633
9.9	3.14852	2.48363	9.9	1.42166	1.3086
9.92	3.23614	2.58463	9.92	1.41447	1.58905
9.94	3.18085	2.34881	9.94	1.42555	1.57013
9.96	3.36321	2.28927	9.96	1.47321	1.65619
9.98	3.13603	2.38281	9.98	1.37762	1.58747
10	2.81738	2.39849	10	1.43032	1.623
10.02	3.08634	2.61157	10.02	1.40467	1.65859
10.04	3.1978	2.659	10.04	1.43711	1.60849
10.06	2.97252	2.50952	10.06	1.34346	1.65405
10.08	3.11799	2.41025	10.08	1.41801	1.59112
10.1	3.01317	2.43028	10.1	1.37903	1.71128
10.12	3.08271	2.38741	10.12	1.44215	1.64962
10.14	2.90381	2.30422	10.14	1.3938	1.4146
10.16	3.20477	2.35018	10.16	1.43417	1.5662
10.18	3.01172	2.36477	10.18	1.52465	1.63579
10.2	2.91095	2.38299	10.2	1.54643	1.4566
10.22	2.92051	2.39971	10.22	1.49965	1.32991
10.24	3.15958	2.44719	10.24	1.52853	1.37957
10.26	2.97986	2.55615	10.26	1.56096	1.44578
10.28	2.86938	2.29558	10.28	1.52566	1.41869
10.3	2.99162	2.27196	10.3	1.51216	1.65914
10.32	2.89538	2.40631	10.32	1.48565	1.17272
10.34	2.7793	2.43802	10.34	1.48477	1.65906
10.36	2.72214	2.485	10.36	1.46355	1.44349
10.38	2.79477	2.21834	10.38	1.40988	1.47646
10.4	2.60265	2.36248	10.4	1.45921	1.483
10.42	2.59758	2.41991	10.42	1.41694	1.58102
10.44	2.35535	2.39273	10.44	1.40446	1.49208
10.46	2.54891	2.42704	10.46	1.43905	1.4273
10.48	2.56866	2.23684	10.48	1.36063	1.25493
10.5	2.77066	2.22467	10.5	1.39933	1.38744
10.52	2.82426	2.40841	10.52	1.49376	1.49619
10.54	2.72107	2.18636	10.54	1.44042	1.56477
10.56	2.71672	2.51362	10.56	1.37047	1.03477
10.58	2.66814	2.24087	10.58	1.45715	1.62466
10.6	2.72212	2.61121	10.6	1.45183	1.37754
10.62	2.73554	2.28842	10.62	1.40321	1.33152
10.64	2.51867	2.54736	10.64	1.43577	1.57425
10.66	2.83125	2.57975	10.66	1.39909	1.5036
10.68	2.8674	2.52716	10.68	1.35427	1.38537
10.7	2.92348	2.66671	10.7	1.44426	1.69984
10.72	3.14747	2.52275	10.72	1.52642	1.57657
10.74	2.73273	2.60851	10.74	1.44824	1.60775
10.76	2.70622	2.30307	10.76	1.37962	1.63577
10.78	2.76725	2.41692	10.78	1.45316	1.32343
10.8	2.88274	2.39196	10.8	1.51041	1.66207
10.82	2.90102	2.39387	10.82	1.5397	1.29313
10.84	2.99429	2.32662	10.84	1.58238	1.61891
10.86	2.94447	2.37692	10.86	1.56831	1.50077
10.88	2.82671	2.61243	10.88	1.53352	1.50864
10.9	2.7701	2.4944	10.9	1.40153	1.58429
10.92	2.75285	2.60291	10.92	1.47372	1.55272
10.94	2.72455	2.64276	10.94	1.45165	1.47202
10.96	2.87247	2.85101	10.96	1.5429	1.46827
10.98	2.88598	2.63474	10.98	1.59358	1.41434
11	2.7735	2.52568	11	1.49106	1.38288
11.02	3.01463	2.60323	11.02	1.47945	1.68089
11.04	2.94149	2.69646	11.04	1.41347	1.49552
11.06	2.94881	2.46404	11.06	1.46444	1.37097
11.08	2.99244	2.53799	11.08	1.46702	1.29849
11.1	2.84359	2.56468	11.1	1.50651	1.31524
11.12	2.66296	2.58805	11.12	1.48748	1.4782
11.14	2.61366	2.5784	11.14	1.55455	1.54477
11.16	2.54836	2.7195	11.16	1.53387	1.28978
11.18	2.57234	2.51498	11.18	1.48905	1.45001
11.2	2.47421	2.38623	11.2	1.43821	1.46614
11.22	2.49147	2.44035	11.22	1.44935	1.27913
11.24	2.48261	2.54683	11.24	1.47338	1.56568
11.26	2.38224	2.53035	11.26	1.50849	1.47773
11.28	2.42979	2.54293	11.28	1.50487	1.38889
11.3	2.42106	2.53225	11.3	1.46545	1.39936
11.32	2.5459	2.72098	11.32	1.43126	1.64649
11.34	2.5177	2.65607	11.34	1.4825	1.50748
11.36	2.48429	2.24834	11.36	1.39325	1.66492
11.38	2.3525	2.46981	11.38	1.45969	1.68048
11.4	2.41426	2.48998	11.4	1.37624	1.54247
11.42	2.44475	2.38609	11.42	1.44131	1.37407
11.44	2.31081	2.2271	11.44	1.44927	1.51708
11.46	2.27884	2.38123	11.46	1.49325	1.68848
11.48	2.24407	2.44715	11.48	1.48693	1.4833
11.5	2.14387	2.17048	11.5	1.48275	0.763835
11.52	2.21537	2.42562	11.52	1.43229	0.831151
11.54	2.26699	2.35334	11.54	1.48846	0.982179
11.56	2.261	2.61636	11.56	1.53302	0.97084
11.58	2.36273	2.38232	11.58	1.63399	1.29581
11.6	2.29931	2.45484	11.6	1.62456	0.820751
11.62	2.4239	2.51595	11.62	1.60437	0.902559
11.64	2.33218	2.53117	11.64	1.5728	0.993856
11.66	2.37968	2.40541	11.66	1.54885	1.39189
11.68	2.4769	2.53647	11.68	1.49317	1.25141
11.7	2.45753	2.233	11.7	1.45139	1.16646
11.72	2.28633	2.45802	11.72	1.49982	0.761098
11.74	2.23789	2.40737	11.74	1.53786	1.00375
11.76	2.39577	2.42277	11.76	1.50197	0.718225
11.78	2.40148	2.43608	11.78	1.5536	0.946986
11.8	2.36137	2.25004	11.8	1.47961	0.968995
11.82	2.29455	2.46749	11.82	1.44259	0.799494
11.84	2.28108	2.14165	11.84	1.56794	0.845044
11.86	2.25767	2.21854	11.86	1.54244	0.830394
11.88	2.20395	2.33885	11.88	1.49817	0.745999
11.9	2.27941	2.24166	11.9	1.53669	0.928001
11.92	2.30607	2.46368	11.92	1.47086	0.89834
11.94	2.1654	2.53322	11.94	1.62827	0.88705
11.96	2.32589	2.62999	11.96	1.45579	1.14117
11.98	2.21986	2.55255	11.98	1.51254	0.796949
12	2.39425	2.50175	12	1.41818	1.04024
12.02	2.30089	2.49545	12.02	1.40609	0.903832
12.04	2.17848	2.35676	12.04	1.47443	0.822984
12.06	2.33264	2.19899	12.06	1.47306	0.843052
12.08	2.21765	2.40743	12.08	1.49348	0.757461
12.1	2.28728	2.26094	12.1	1.53042	0.863569
12.12	2.31427	2.39692	12.12	1.51517	0.776915
12.14	2.24138	2.6409	12.14	1.60216	0.775544
12.16	2.04985	2.4636	12.16	1.52788	1.1581
12.18	2.04589	2.16217	12.18	1.58709	1.14715
12.2	2.2687	2.51343	12.2	1.57738	0.852321
12.22	2.30331	2.20752	12.22	1.50655	0.811814
12.24	2.21966	2.429	12.24	1.43464	0.898563
12.26	2.11121	2.43788	12.26	1.47917	0.742661
12.28	2.08183	2.17096	12.28	1.43399	0.794673
12.3	2.17708	2.27324	12.3	1.46448	0.934337
12.32	2.15019	2.344	12.32	1.44796	0.751785
12.34	2.17743	2.37262	12.34	1.51326	1.07061
12.36	2.13821	2.2775	12.36	1.4607	1.30675
12.38	2.20938	2.619	12.38	1.49822	1.22204
12.4	2.29151	2.42776	12.4	1.50679	1.34717
12.42	2.22833	2.52466	12.42	1.41474	1.00481
12.44	2.40705	2.36234	12.44	1.53693	1.24351
12.46	2.40651	2.54694	12.46	1.56476	1.25904
12.48	2.30037	2.40872	12.48	1.6732	1.22583
12.5	2.35009	2.53265	12.5	1.54014	1.13944
12.52	2.32044	2.64209	12.52	1.54511	0.996517
12.54	2.39637	2.75103	12.54	1.47864	1.27159
12.56	2.27305	2.55931	12.56	1.52292	0.887407
12.58	2.39038	2.67832	12.58	1.457	1.33474
12.6	2.38861	2.35235	12.6	1.51244	1.41143
12.62	2.49668	2.42011	12.62	1.52035	1.42335
12.64	2.35586	2.61534	12.64	1.50534	1.55305
12.66	2.41607	2.59706	12.66	1.53027	1.62667
12.68	2.43932	2.63882	12.68	1.50619	1.34971
12.7	2.22235	2.86522	12.7	1.53876	1.5411
12.72	2.27745	2.41249	12.72	1.54704	1.59567
12.74	2.26174	2.7522	12.74	1.66299	1.44901
12.76	2.26593	2.38791	12.76	1.58277	1.60213
12.78	2.25881	2.37234	12.78	1.62638	1.66014
12.8	2.13643	2.31968	12.8	1.67029	1.58294
12.82	2.12878	2.80682	12.82	1.69414	1.49396
12.84	2.22249	2.16541	12.84	1.64483	1.44764
12.86	2.24504	2.34971	12.86	1.64907	1.6387
12.88	2.32511	2.25276	12.88	1.75064	1.38176
12.9	2.28527	2.4461	12.9	1.6726	1.62148
12.92	2.129	2.35099	12.92	1.68683	1.35149
12.94	2.19875	2.37726	12.94	1.70635	1.65461
12.96	2.27064	2.44862	12.96	1.76392	1.5462
12.98	2.23422	2.45255	12.98	1.67361	1.49489
13	2.24527	2.7296	13	1.64324	1.74326
13.02	2.27105	2.60561	13.02	1.58769	1.62776
13.04	2.489	2.39106	13.04	1.60491	1.66248
13.06	2.46696	2.55405	13.06	1.60817	1.65762
13.08	2.36306	2.33397	13.08	1.5585	1.66556
13.1	2.41637	2.38239	13.1	1.65987	1.30757
13.12	2.41609	2.43545	13.12	1.66743	1.49294
13.14	2.6183	2.32077	13.14	1.67334	1.37258
13.16	2.56756	2.21082	13.16	1.74472	1.4686
13.18	2.59599	2.7728	13.18	1.7626	1.5279
13.2	2.72845	2.35569	13.2	1.73452	1.60433
13.22	2.57271	2.69176	13.22	1.70367	1.611
13.24	2.685	2.63929	13.24	1.66566	1.46542
13.26	2.64355	2.35471	13.26	1.6327	1.50582
13.28	2.54949	2.51903	13.28	1.67116	1.28863
13.3	2.63687	2.63036	13.3	1.7215	1.55808
13.32	2.53482	2.70264	13.32	1.70028	1.34991
13.34	2.53711	2.8722	13.34	1.67694	1.59011
13.36	2.5143	2.84669	13.36	1.63374	1.48997
13.38	2.508	2.7881	13.38	1.62179	1.27422
13.4	2.37897	2.87738	13.4	1.59901	1.46696
13.42	2.4933	2.74425	13.42	1.71026	0.958377
13.44	2.60345	2.76747	13.44	1.66427	0.875784
13.46	2.51475	2.78235	13.46	1.71166	0.605476
13.48	2.6176	2.9074	13.48	1.5742	0.559013
13.5	2.43011	2.52648	13.5	1.46359	1.14604
13.52	2.47158	2.94833	13.52	1.51616	1.1679
13.54	2.45401	2.69488	13.54	1.59429	1.33213
13.56	2.41206	2.93211	13.56	1.55473	1.2177
13.58	2.43433	2.70572	13.58	1.51735	1.16859
13.6	2.31112	2.93305	13.6	1.62872	0.945342
13.62	2.2927	2.70748	13.62	1.61771	1.12719
13.64	2.37349	2.88183	13.64	1.55519	0.888763
13.66	2.40985	2.8191	13.66	1.65317	0.940701
13.68	2.52761	2.93025	13.68	1.56318	0.527063
13.7	2.67216	2.95165	13.7	1.53053	0.984333
13.72	2.59339	2.94049	13.72	1.45961	0.669315
13.74	2.42825	2.98009	13.74	1.55722	0.661724
13.76	2.33674	2.74786	13.76	1.54991	0.735379
13.78	2.32033	2.13201	13.78	1.52281	1.10944
13.8	2.41918	2.50749	13.8	1.59789	0.876449
13.82	2.46141	2.43045	13.82	1.67354	0.981233
13.84	2.57394	2.34264	13.84	1.54008	1.02895
13.86	2.50869	2.59662	13.86	1.54627	1.12103
13.88	2.59367	2.13317	13.88	1.58736	0.565684
13.9	2.60582	2.53722	13.9	1.55915	0.482993
13.92	2.53474	2.45954	13.92	1.54139	1.04261
13.94	2.7133	2.31717	13.94	1.62454	0.895716
13.96	2.65249	2.38692	13.96	1.62246	1.06697
13.98	2.65468	2.61223	13.98	1.55707	1.01585
14	2.58462	2.46861	14	1.57134	0.557414
14.02	2.6945	2.48081	14.02	1.52097	0.77328
14.04	2.56852	2.5247	14.04	1.46541	0.851629
14.06	2.3804	2.22115	14.06	1.54432	0.639342
14.08	2.39438	2.44995	14.08	1.55148	1.13437
14.1	2.5184	2.39447	14.1	1.59569	1.17261
14.12	2.47309	2.22548	14.12	1.56917	0.987798
14.14	2.48424	2.16535	14.14	1.62103	1.06706
14.16	2.36153	2.33067	14.16	1.55238	0.899449
14.18	2.47276	2.18359	14.18	1.60985	0.633794
14.2	2.55055	2.0848	14.2	1.52046	0.7939
14.22	2.59051	2.44012	14.22	1.59962	0.586932
14.24	2.71235	2.48195	14.24	1.5623	0.657746
14.26	2.63275	2.20386	14.26	1.57954	0.697255
14.28	2.73714	2.33231	14.28	1.60626	0.863786
14.3	2.65229	2.30677	14.3	1.56902	1.01473
14.32	2.54635	2.17962	14.32	1.59591	0.732714
14.34	2.52618	2.39535	14.34	1.60956	1.02342
14.36	2.67066	2.10801	14.36	1.66709	1.06773
14.38	2.51562	2.14847	14.38	1.64407	0.988613
14.4	2.61196	2.26375	14.4	1.66247	1.0632
14.42	2.52025	2.19905	14.42	1.7142	1.04212
14.44	2.57018	2.4121	14.44	1.61854	1.23821
14.46	2.47901	2.43196	14.46	1.61673	0.846707
14.48	2.47434	2.07952	14.48	1.57173	1.0824
14.5	2.57072	2.46017	14.5	1.56014	1.01553
14.52	2.5188	2.33584	14.52	1.55486	1.1937
14.54	2.52358	2.50833	14.54	1.55296	1.09001
14.56	2.36657	2.48631	14.56	1.62154	1.01366
14.58	2.47774	2.24007	14.58	1.55918	0.765375
14.6	2.52664	2.41487	14.6	1.57782	1.12019
14.62	2.56564	2.34962	14.62	1.61066	1.03904
14.64	2.5266	2.22643	14.64	1.68072	0.842554
14.66	2.51342	2.21292	14.66	1.6037	0.80096
14.68	2.55591	2.1783	14.68	1.56135	0.967318
14.7	2.59921	2.29696	14.7	1.44449	1.10262
14.72	2.65253	2.16809	14.72	1.52811	1.0594
14.74	2.76327	2.27621	14.74	1.49987	0.79459
14.76	2.55111	2.47395	14.76	1.48395	1.24789
14.78	2.72083	2.28289	14.78	1.50453	1.38573
14.8	2.75427	2.3394	14.8	1.48461	1.24696
14.82	2.69334	2.57088	14.82	1.47401	1.10281
14.84	2.67687	2.43934	14.84	1.45587	0.820275
14.86	2.7204	2.61041	14.86	1.41795	1.18053
14.88	2.56154	2.48957	14.88	1.41875	0.895777
14.9	2.72551	2.48177	14.9	1.48683	1.12437
14.92	2.65207	2.28022	14.92	1.41606	1.03181
14.94	2.83589	2.49722	14.94	1.49947	0.759036
14.96	2.84251	2.41847	14.96	1.55806	0.773627
14.98	2.79928	2.4188	14.98	1.62437	1.36366
15	2.81782	2.25094	15	1.56213	1.49501
15.02	2.80113	2.15791	15.02	1.48082	1.68401
15.04	2.75001	2.39976	15.04	1.4863	1.60709
15.06	2.49267	2.14717	15.06	1.45389	1.47159
15.08	2.51212	2.41791	15.08	1.57954	1.57473
15.1	2.59411	2.53519	15.1	1.45536	1.6706
15.12	2.58256	2.28864	15.12	1.508	1.45565
15.14	2.60079	2.19609	15.14	1.57015	1.60119
15.16	2.66037	2.33028	15.16	1.5762	1.05383
15.18	2.70844	2.40589	15.18	1.47198	0.747723
15.2	2.74486	2.34302	15.2	1.52768	1.13346
15.22	2.6112	2.32044	15.22	1.53269	1.07577
15.24	2.55858	2.31591	15.24	1.5331	0.837549
15.26	2.63921	2.18243	15.26	1.4189	0.77109
15.28	2.67073	2.51061	15.28	1.47086	0.907591
15.3	2.63754	2.2429	15.3	1.46468	0.785538
15.32	2.50547	2.21458	15.32	1.5314	0.883619
15.34	2.37032	2.55685	15.34	1.64779	0.710415
15.36	2.40197	2.63091	15.36	1.60424	0.881882
15.38	2.51154	2.61163	15.38	1.60217	1.00619
15.4	2.55624	2.27935	15.4	1.67111	1.22583
15.42	2.53602	2.19508	15.42	1.64508	0.92851
15.44	2.40342	2.26829	15.44	1.62323	1.01956
15.46	2.53864	2.26454	15.46	1.54038	0.94633
15.48	2.48893	2.35495	15.48	1.63979	1.08496
15.5	2.43132	2.33493	15.5	1.58513	0.557707
15.52	2.39029	2.30201	15.52	1.63883	1.09959
15.54	2.44172	2.40036	15.54	1.74082	0.726367
15.56	2.36207	2.21065	15.56	1.78765	1.29236
15.58	2.41724	2.38723	15.58	1.70481	1.04805
15.6	2.57545	2.43387	15.6	1.70417	0.671676
15.62	2.46298	2.64275	15.62	1.67947	1.27366
15.64	2.58591	2.29475	15.64	1.52395	1.10061
15.66	2.52947	2.48958	15.66	1.61216	1.08495
15.68	2.66881	2.39262	15.68	1.56613	1.04914
15.7	2.76119	2.34515	15.7	1.56413	1.06833
15.72	2.67143	2.38732	15.72	1.61573	0.775858
15.74	2.84335	2.75298	15.74	1.65403	0.649544
15.76	2.54569	2.50641	15.76	1.61744	0.660322
15.78	2.76485	2.57712	15.78	1.56069	0.819719
15.8	2.68565	2.672	15.8	1.57371	1.13147
15.82	2.78735	2.44974	15.82	1.53866	0.65449
15.84	2.79787	2.45082	15.84	1.60747	0.868285
15.86	2.6861	2.485	15.86	1.52915	0.935333
15.88	2.66383	2.3523	15.88	1.48651	1.2058
15.9	2.8076	2.36119	15.9	1.40575	0.822836
15.92	2.88874	2.20514	15.92	1.45036	0.73752
15.94	2.80373	2.34745	15.94	1.45103	1.14197
15.96	2.81564	2.52075	15.96	1.48412	0.969719
15.98	2.82122	2.36963	15.98	1.57108	1.05773
16	2.84805	2.21874	16	1.62213	1.06343
16.02	2.85877	2.38132	16.02	1.72239	0.774809
16.04	2.77045	2.28921	16.04	1.71757	0.782162
16.06	2.70558	2.58452	16.06	1.70738	1.18925
16.08	2.74489	2.66844	16.08	1.63439	0.763363
16.1	2.76735	2.67057	16.1	1.47836	0.872163
16.12	2.76392	2.66332	16.12	1.5765	1.08095
16.14	2.65819	2.62376	16.14	1.69177	0.877603
16.16	2.67281	2.70885	16.16	1.62563	0.842177
16.18	2.78095	2.68109	16.18	1.63625	0.920414
16.2	2.58105	2.67514	16.2	1.69231	1.17689
16.22	2.69499	2.41809	16.22	1.67701	1.06821
16.24	2.71083	2.74269	16.24	1.64527	0.854176
16.26	2.60187	2.61325	16.26	1.66428	1.39012
16.28	2.50262	2.66078	16.28	1.65228	0.939168
16.3	2.58967	2.73662	16.3	1.62289	0.799437
16.32	2.61241	2.83592	16.32	1.6109	0.736838
16.34	2.68722	2.54903	16.34	1.64564	1.03309
16.36	2.78607	2.81824	16.36	1.61369	1.00145
16.38	2.77651	2.66	16.38	1.78594	0.918437
16.4	2.82442	2.64239	16.4	1.7657	0.857431
16.42	2.75215	2.50625	16.42	1.79972	0.954745
16.44	2.8431	2.60732	16.44	1.68119	1.28435
16.46	2.80276	2.60162	16.46	1.63414	1.13305
16.48	2.70853	2.51787	16.48	1.60779	0.737591
16.5	2.77315	2.60044	16.5	1.6604	0.795552
16.52	2.65979	2.49626	16.52	1.67155	1.20687
16.54	2.76562	2.42488	16.54	1.67606	1.34689
16.56	2.74704	2.51975	16.56	1.69186	0.805419
16.58	2.60952	2.55989	16.58	1.66493	0.945192
16.6	2.68922	2.54842	16.6	1.6964	1.03126
16.62	2.73928	2.74077	16.62	1.68752	1.17293
16.64	2.66947	2.73188	16.64	1.60965	0.813098
16.66	2.84905	2.6803	16.66	1.57179	0.989512
16.68	2.81087	2.58605	16.68	1.62917	0.877232
16.7	2.80299	2.28023	16.7	1.63212	0.800765
16.72	2.8624	2.08499	16.72	1.61974	0.850692
16.74	2.84824	2.26833	16.74	1.63556	0.711835
16.76	2.87419	2.38394	16.76	1.66351	0.634069
16.78	2.8859	2.52995	16.78	1.60953	0.595611
16.8	3.0114	2.30959	16.8	1.54903	0.775853
16.82	2.88821	2.41969	16.82	1.5856	0.784505
16.84	2.81547	2.36063	16.84	1.58657	0.71024
16.86	2.76637	2.25493	16.86	1.54654	0.68768
16.88	2.74892	2.37367	16.88	1.58161	0.751276
16.9	2.71919	2.41282	16.9	1.63527	0.73413
16.92	2.72329	2.36117	16.92	1.54926	0.787816
16.94	2.78424	2.3134	16.94	1.5225	0.80984
16.96	2.96443	2.17105	16.96	1.60693	0.84067
16.98	2.88007	2.41274	16.98	1.5024	0.808077
17	2.99357	2.23788	17	1.58222	0.902859
17.02	2.91051	2.34178	17.02	1.53699	1.0231
17.04	2.88682	2.44461	17.04	1.60804	0.86959
17.06	2.88625	2.23888	17.06	1.6187	0.875023
17.08	2.87249	2.26417	17.08	1.73147	1.23356
17.1	3.01235	2.19794	17.1	1.66762	1.29888
17.12	2.98213	2.29037	17.12	1.73197	1.1091
17.14	2.91066	2.34174	17.14	1.65071	0.83389
17.16	2.85168	2.31688	17.16	1.63786	0.77287
17.18	3.02111	2.52697	17.18	1.58836	0.871413
17.2	2.84473	2.32111	17.2	1.62397	0.880255
17.22	2.85539	2.42205	17.22	1.60466	0.922962
17.24	2.82114	2.10748	17.24	1.48803	0.975808
17.26	2.74521	2.52223	17.26	1.5062	0.904686
17.28	2.86572	2.34501	17.28	1.56128	0.889554
17.3	2.84783	2.51604	17.3	1.54774	0.915027
17.32	2.77815	2.64426	17.32	1.5346	0.836713
17.34	2.80002	2.56829	17.34	1.54264	0.744704
17.36	2.84445	2.50106	17.36	1.4581	1.00756
17.38	2.85067	2.27235	17.38	1.51973	0.904313
17.4	2.8745	2.35915	17.4	1.46497	0.850911
17.42	2.76397	2.42991	17.42	1.48188	0.874579
17.44	2.7584	2.48042	17.44	1.43605	0.803556
17.46	2.63699	2.34455	17.46	1.4256	0.868033
17.48	2.63629	2.07094	17.48	1.45117	1.48795
17.5	2.58483	2.01868	17.5	1.59792	1.655
17.52	2.71324	2.3791	17.52	1.59594	1.65934
17.54	2.63605	2.43223	17.54	1.56325	1.66299
17.56	2.67814	2.25473	17.56	1.53497	1.38588
17.58	2.72756	2.22687	17.58	1.56216	1.3863
17.6	2.72018	2.14602	17.6	1.50964	1.60715
17.62	2.69807	2.31296	17.62	1.5734	1.40908
17.64	2.66574	2.12884	17.64	1.57844	1.56978
17.66	2.76736	2.1731	17.66	1.57279	1.65963
17.68	2.8016	2.27484	17.68	1.55864	1.58875
17.7	2.86357	2.15797	17.7	1.50805	1.49445
17.72	2.74144	2.18457	17.72	1.50295	1.61029
17.74	2.86377	2.44002	17.74	1.63843	1.66665
17.76	2.80398	2.27661	17.76	1.57848	1.61812
17.78	2.81882	2.3356	17.78	1.59585	1.68916
17.8	2.84281	2.37015	17.8	1.66097	1.59676
17.82	2.9235	2.39846	17.82	1.58788	1.64134
17.84	2.78986	2.09091	17.84	1.68719	1.58021
17.86	2.80328	2.25368	17.86	1.59312	1.51808
17.88	2.94856	2.29937	17.88	1.66326	1.63881
17.9	2.89749	2.18695	17.9	1.60975	1.56873
17.92	2.87501	2.07321	17.92	1.64799	1.60659
17.94	3.00359	2.42509	17.94	1.61717	1.57497
17.96	2.83233	2.30732	17.96	1.63819	1.59564
17.98	2.81047	2.34013	17.98	1.57333	1.58687
18	2.86414	2.22454	18	1.545	1.40813
18.02	2.85144	2.2879	18.02	1.65511	1.43642
18.04	2.94603	2.34719	18.04	1.54432	1.41756
18.06	2.95951	2.28734	18.06	1.56554	1.44508
18.08	2.82677	2.25626	18.08	1.58031	1.62835
18.1	2.95199	2.45984	18.1	1.59699	1.64429
18.12	3.03344	2.28516	18.12	1.61709	1.6082
18.14	2.97606	2.22357	18.14	1.69528	1.66108
18.16	2.93641	2.28418	18.16	1.63616	1.60516
18.18	2.94824	2.29341	18.18	1.72362	1.598
18.2	2.76893	2.51516	18.2	1.61252	1.67822
18.22	2.96344	2.34387	18.22	1.74497	1.62233
18.24	2.84893	2.46175	18.24	1.67708	1.58998
18.26	2.94016	2.58631	18.26	1.62616	1.64327
18.28	2.76239	2.41323	18.28	1.73554	1.71081
18.3	2.93438	2.34755	18.3	1.61171	1.64125
18.32	3.03371	2.37857	18.32	1.73374	1.61934
18.34	2.95789	2.34594	18.34	1.7602	1.62266
18.36	2.92944	2.41181	18.36	1.69916	1.58662
18.38	3.12773	2.32224	18.38	1.64895	1.57406
18.4	3.05451	2.46868	18.4	1.62898	1.40289
18.42	3.08397	2.35191	18.42	1.63089	1.63276
18.44	2.99527	2.59891	18.44	1.64149	1.61691
18.46	3.04755	2.29343	18.46	1.62628	1.63306
18.48	2.94631	2.25653	18.48	1.69615	1.64982
18.5	2.84306	2.22816	18.5	1.68257	1.30255
18.52	2.85083	2.34046	18.52	1.66324	1.67332
18.54	2.90797	2.43541	18.54	1.62172	1.6947
18.56	2.81368	2.24718	18.56	1.712	1.64769
18.58	2.76248	2.40364	18.58	1.58725	1.42772
18.6	2.80732	2.3536	18.6	1.52728	1.45289
18.62	2.90419	2.46474	18.62	1.70305	1.50191
18.64	2.69098	2.25689	18.64	1.70878	1.58101
18.66	2.81214	2.27974	18.66	1.67955	1.44866
18.68	2.74642	2.19727	18.68	1.6483	1.42709
18.7	2.673	2.55749	18.7	1.53724	1.60771
18.72	2.72464	2.25649	18.72	1.60949	1.64188
18.74	2.78414	2.21714	18.74	1.68742	1.21739
18.76	2.77638	2.31239	18.76	1.59186	0.961842
18.78	2.76728	2.30387	18.78	1.53695	0.851419
18.8	2.97418	2.63247	18.8	1.55298	1.28419
18.82	2.90381	2.25174	18.82	1.63864	1.76448
18.84	2.87337	2.49905	18.84	1.64005	1.65885
18.86	2.83008	2.53444	18.86	1.76983	1.61133
18.88	2.84911	2.4742	18.88	1.6032	1.62511
18.9	2.92502	2.3343	18.9	1.66845	1.65364
18.92	2.7821	2.37186	18.92	1.6362	1.76408
18.94	2.76397	2.38573	18.94	1.60375	1.07058
18.96	2.76587	2.41089	18.96	1.66916	0.826454
18.98	2.65069	2.48461	18.98	1.59288	0.803263
19	2.63035	2.67394	19	1.59538	0.948318
19.02	2.67336	2.69702	19.02	1.50401	1.03204
19.04	2.6181	2.54252	19.04	1.59137	0.903668
19.06	2.76574	2.48048	19.06	1.62601	0.839159
19.08	2.86585	2.79108	19.08	1.59819	0.991475
19.1	2.6751	2.75649	19.1	1.62435	0.936481
19.12	2.68105	2.79723	19.12	1.65817	1.26999
19.14	2.77671	2.7799	19.14	1.64291	1.17673
19.16	2.6941	2.55869	19.16	1.64224	0.934223
19.18	2.67028	2.59917	19.18	1.60857	0.8654
19.2	2.6821	2.69861	19.2	1.65663	0.882162
19.22	2.79304	2.71773	19.22	1.72512	1.4133
19.24	2.76475	2.83563	19.24	1.69772	1.29299
19.26	2.82368	2.551	19.26	1.66126	1.19893
19.28	2.79679	2.80735	19.28	1.69425	1.45629
19.3	2.78439	2.65338	19.3	1.57864	1.39292
19.32	2.72734	2.79212	19.32	1.61949	0.947959
19.34	2.64376	2.70877	19.34	1.60052	0.96386
19.36	2.78294	2.75013	19.36	1.65518	0.955175
19.38	2.83481	2.74576	19.38	1.60811	1.16945
19.4	2.77337	2.74995	19.4	1.66146	1.20775
19.42	2.70757	2.76956	19.42	1.57345	1.06109
19.44	2.75364	2.83966	19.44	1.59104	0.958779
19.46	2.80222	2.67078	19.46	1.49728	1.23931
19.48	2.86892	2.63563	19.48	1.51662	1.12921
19.5	2.96296	2.68272	19.5	1.58606	1.00804
19.52	2.97812	2.42905	19.52	1.52528	1.22468
19.54	3.02616	2.86331	19.54	1.53349	1.28262
19.56	3.14238	2.43902	19.56	1.57526	1.23037
19.58	2.95396	2.08315	19.58	1.6111	1.19186
19.6	3.04512	2.39134	19.6	1.58177	1.54488
19.62	3.27841	2.32968	19.62	1.56292	1.02614
19.64	3.12519	2.52547	19.64	1.52372	1.29095
19.66	3.04552	2.53288	19.66	1.57214	1.18504
19.68	2.99817	2.42798	19.68	1.67433	1.1044
19.7	3.08763	2.44107	19.7	1.58148	1.18455
19.72	2.95723	2.55423	19.72	1.52994	0.87762
19.74	3.03548	2.64602	19.74	1.49452	0.856633
19.76	3.0088	2.61071	19.76	1.55534	1.10247
19.78	3.0141	2.42034	19.78	1.5471	1.39577
19.8	2.79449	2.39719	19.8	1.52508	1.37442
19.82	2.85673	2.33821	19.82	1.45842	1.30556
19.84	3.07241	2.48819	19.84	1.5	1.20207
19.86	2.97412	2.47365	19.86	1.46929	1.15329
19.88	2.97503	2.34336	19.88	1.52201	1.10731
19.9	2.86709	2.4024	19.9	1.5684	0.985757
19.92	3.0056	2.37718	19.92	1.53749	1.12311
19.94	2.83494	2.35478	19.94	1.50791	1.04251
19.96	2.88737	2.41705	19.96	1.51789	0.772294
19.98	2.87899	2.17339	19.98	1.47487	1.25088
20	2.9273	2.35745	20	1.46913	1.1078
20.02	2.9021	2.2429	20.02	1.56744	1.4954
20.04	3.03493	2.20091	20.04	1.58261	1.27642
20.06	2.96837	2.028	20.06	1.58216	1.45813
20.08	3.00493	2.32498	20.08	1.6423	1.62759
20.1	2.89145	2.23974	20.1	1.58571	1.55308
20.12	2.94363	2.38393	20.12	1.63756	1.6073
20.14	3.04982	2.36693	20.14	1.61512	1.59614
20.16	2.94808	2.17287	20.16	1.63758	1.58721
20.18	2.9771	2.23816	20.18	1.53279	1.66805
20.2	2.98145	2.28465	20.2	1.44462	1.61233
20.22	3.11438	2.32096	20.22	1.50291	1.5452
20.24	3.03313	2.41764	20.24	1.51005	1.59943
20.26	2.96131	2.30698	20.26	1.6705	1.64468
20.28	3.04446	2.24338	20.28	1.68239	1.45364
20.3	3.0252	2.22248	20.3	1.64233	1.70467
20.32	3.11586	2.48448	20.32	1.73167	1.53309
20.34	3.0788	2.16519	20.34	1.71468	1.51902
20.36	3.11899	2.25371	20.36	1.60772	1.45545
20.38	3.1193	2.29312	20.38	1.65998	1.6207
20.4	3.05645	2.3264	20.4	1.56975	1.59263
20.42	2.95698	2.32963	20.42	1.68556	1.65531
20.44	3.0629	2.29318	20.44	1.63232	1.55436
20.46	2.93829	2.31329	20.46	1.63742	1.51909
20.48	3.12221	2.25848	20.48	1.65945	1.67356
20.5	3.03811	2.31201	20.5	1.69201	1.55191
20.52	2.88159	2.23953	20.52	1.63012	1.62619
20.54	3.02378	2.35256	20.54	1.66005	1.66017
20.56	3.12531	2.15797	20.56	1.58665	1.62407
20.58	3.2096	2.2731	20.58	1.5639	1.58868
20.6	3.31082	2.23937	20.6	1.68704	1.57476
20.62	3.12065	2.33047	20.62	1.6025	1.59645
20.64	3.17892	2.3143	20.64	1.57672	1.5787
20.66	3.2066	2.32843	20.66	1.61103	1.5906
20.68	3.10089	2.40534	20.68	1.61883	1.56721
20.7	3.00043	2.14234	20.7	1.63656	1.56235
20.72	3.10801	2.18133	20.72	1.66599	1.5691
20.74	3.02287	2.17192	20.74	1.59525	1.63398
20.76	2.92569	2.25938	20.76	1.52835	1.37563
20.78	3.03855	2.2603	20.78	1.53413	1.4646
20.8	3.05469	2.27803	20.8	1.64431	1.51032
20.82	3.06065	2.25422	20.82	1.71082	1.36542
20.84	3.15552	2.27977	20.84	1.64886	1.39558
20.86	3.0471	2.66932	20.86	1.73881	1.37059
20.88	3.07783	2.60458	20.88	1.68792	1.46912
20.9	3.10863	2.49699	20.9	1.60091	1.54882
20.92	3.19143	2.60948	20.92	1.61059	1.52719
20.94	3.18657	2.68322	20.94	1.60615	1.70563
20.96	3.20402	2.39118	20.96	1.70361	1.54209
20.98	3.33266	2.76848	20.98	1.61161	1.58331
21	3.24218	2.55679	21	1.63423	1.63728
21.02	3.22746	2.63603	21.02	1.61053	1.55086
21.04	3.19446	2.58386	21.04	1.59008	1.54394
21.06	3.20984	2.80543	21.06	1.62497	1.61243
21.08	3.25133	2.773	21.08	1.58793	1.71039
21.1	3.24414	2.66086	21.1	1.63276	1.70176
21.12	3.20745	2.76328	21.12	1.59157	1.68453
21.14	3.20577	2.70758	21.14	1.66839	1.67513
21.16	3.00083	2.6279	21.16	1.63746	1.71413
21.18	3.03523	2.71039	21.18	1.59315	1.69886
21.2	3.08984	2.60531	21.2	1.59318	1.70166
21.22	3.18293	2.5291	21.22	1.58621	1.6544
21.24	3.16512	2.74288	21.24	1.56432	1.79731
21.26	3.03857	2.64662	21.26	1.55228	1.74989
21.28	3.07941	2.83707	21.28	1.60348	1.74175
21.3	3.23837	2.53218	21.3	1.54892	1.6736
21.32	3.14839	2.66003	21.32	1.55565	1.66779
21.34	3.05593	2.66019	21.34	1.50567	1.55535
21.36	3.04279	2.66962	21.36	1.6395	1.66249
21.38	3.07743	2.56359	21.38	1.69338	1.74678
21.4	3.0982	2.63372	21.4	1.65795	1.70219
21.42	3.09721	2.60501	21.42	1.73194	1.59649
21.44	3.09894	2.59111	21.44	1.63379	1.62461
21.46	3.09426	2.66247	21.46	1.7067	1.55629
21.48	3.08768	2.65649	21.48	1.68211	1.39322
21.5	3.12145	2.47238	21.5	1.78025	1.60675
21.52	2.88889	2.64508	21.52	1.65112	1.84646
21.54	3.03242	2.63158	21.54	1.79152	1.739
21.56	3.10025	2.53836	21.56	1.72138	1.75029
21.58	3.14158	2.56471	21.58	1.67389	1.75934
21.6	2.98954	2.60423	21.6	1.63878	1.72321
21.62	3.11004	2.62543	21.62	1.70107	1.7493
21.64	3.1527	2.57786	21.64	1.60789	1.76773
21.66	2.96712	2.59822	21.66	1.65892	1.71656
21.68	3.13139	2.54675	21.68	1.70544	1.70528
21.7	3.31357	2.68974	21.7	1.59463	1.76789
21.72	3.20091	2.57077	21.72	1.65918	1.65037
21.74	3.14778	2.61864	21.74	1.67091	1.89443
21.76	3.28053	2.75779	21.76	1.70522	1.99379
21.78	3.1731	2.67197	21.78	1.62581	2.55077
21.8	3.27709	2.64721	21.8	1.7764	1.97454
21.82	3.22206	2.58009	21.82	1.68986	2.13033
21.84	3.0316	2.54622	21.84	1.67679	2.2006
21.86	3.29769	2.60032	21.86	1.62382	2.11938
21.88	3.25973	2.59436	21.88	1.6182	2.25986
21.9	3.10385	2.51012	21.9	1.59075	2.15279
21.92	3.29667	2.69596	21.92	1.62423	2.07593
21.94	3.31465	2.71519	21.94	1.57106	2.27285
21.96	3.28662	2.70354	21.96	1.70494	2.27734
21.98	3.13496	2.66946	21.98	1.56261	1.92914
22	3.30439	2.69659	22	1.57949	2.03262
22.02	3.2236	2.70374	22.02	1.68395	2.08709
22.04	3.23451	2.44877	22.04	1.60015	2.22907
22.06	3.15373	2.48625	22.06	1.61049	2.14919
22.08	3.09895	2.5705	22.08	1.66552	2.22319
22.1	2.95845	2.50066	22.1	1.70557	2.35016
22.12	3.01913	2.45564	22.12	1.66059	2.09248
22.14	3.19085	2.51716	22.14	1.57599	2.17399
22.16	3.17456	2.28028	22.16	1.7275	2.17277
22.18	3.17861	2.67031	22.18	1.67856	2.19582
22.2	3.07905	2.53846	22.2	1.7243	2.01672
22.22	3.09935	2.58264	22.22	1.67961	2.14574
22.24	3.06094	2.5189	22.24	1.75494	2.13919
22.26	3.11672	2.47469	22.26	1.74877	2.0288
22.28	3.13196	2.59141	22.28	1.67745	2.06905
22.3	3.0153	2.30949	22.3	1.62873	2.15836
22.32	3.03264	2.28936	22.32	1.75901	2.10737
22.34	2.91347	2.23211	22.34	1.74394	2.62395
22.36	2.89262	2.31041	22.36	1.85163	2.52663
22.38	2.82248	2.65161	22.38	1.73326	2.55775
22.4	2.95443	2.64235	22.4	1.74364	2.42982
22.42	2.91042	2.50619	22.42	1.78375	2.29616
22.44	2.9071	2.59029	22.44	1.69414	2.46065
22.46	2.95592	2.63099	22.46	1.68107	2.48196
22.48	3.02383	2.59505	22.48	1.75973	2.46085
22.5	3.01325	2.57842	22.5	1.70631	2.49847
22.52	3.04752	2.56961	22.52	1.77095	2.65925
22.54	3.04019	2.65313	22.54	1.62256	2.58369
22.56	3.05713	2.64723	22.56	1.71186	2.45802
22.58	3.09746	2.53099	22.58	1.70081	2.36398
22.6	3.0808	2.59469	22.6	1.69876	2.3994
22.62	3.02207	2.58533	22.62	1.64764	2.70807
22.64	3.10307	2.51512	22.64	1.67324	2.41291
22.66	3.00534	2.42916	22.66	1.68474	2.24958
22.68	2.96493	2.60605	22.68	1.65583	2.26004
22.7	2.93397	2.67018	22.7	1.70364	2.26946
22.72	3.05472	2.27843	22.72	1.78169	2.30928
22.74	3.01139	2.60193	22.74	1.7396	2.52626
22.76	3.04858	2.57454	22.76	1.64952	2.40661
22.78	3.09008	2.70257	22.78	1.76349	2.34637
22.8	2.97359	2.7119	22.8	1.7871	2.52182
22.82	3.04641	2.50966	22.82	1.66132	2.202
22.84	3.04343	2.65381	22.84	1.76492	2.3754
22.86	3.04122	2.21232	22.86	1.66767	2.37571
22.88	2.98887	2.6567	22.88	1.66727	2.16129
22.9	3.02784	2.46485	22.9	1.70237	2.22092
22.92	3.05395	2.65005	22.92	1.69782	2.25177
22.94	3.02844	2.60705	22.94	1.79938	2.20135
22.96	3.03257	2.56731	22.96	1.81541	2.10831
22.98	3.00422	2.55835	22.98	1.72112	2.38517
23	3.09438	2.44238	23	1.65736	2.36009
23.02	3.14142	2.4183	23.02	1.64037	2.13447
23.04	3.09164	2.42019	23.04	1.75721	2.14068
23.06	2.99864	2.36804	23.06	1.69683	2.27265
23.08	3.14863	2.63254	23.08	1.80062	2.05001
23.1	3.07849	2.56941	23.1	1.73516	2.01962
23.12	3.12244	2.50169	23.12	1.73707	2.25014
23.14	3.14662	2.56236	23.14	1.72717	1.9265
23.16	3.09947	2.46107	23.16	1.72605	2.17205
23.18	3.10122	2.54463	23.18	1.7817	2.2177
23.2	3.24843	2.69594	23.2	1.60477	2.26607
23.22	3.19468	2.45737	23.22	1.75077	2.28685
23.24	3.39821	2.69286	23.24	1.63453	2.30877
23.26	3.24779	2.73723	23.26	1.83118	2.25278
23.28	3.13404	2.69576	23.28	1.76204	2.32524
23.3	3.24263	2.47313	23.3	1.79348	2.23487
23.32	3.17732	2.70071	23.32	1.80657	2.03439
23.34	3.21243	2.46722	23.34	1.81725	2.08224
23.36	3.40036	2.41803	23.36	1.81208	2.08061
23.38	3.44866	2.80827	23.38	1.7416	2.17844
23.4	3.45085	2.39892	23.4	1.81275	2.14776
23.42	3.39606	2.59882	23.42	1.74534	2.67053
23.44	3.24043	2.54665	23.44	1.8189	2.43315
23.46	3.36463	2.49221	23.46	1.79541	2.30148
23.48	3.36793	2.6857	23.48	1.69646	2.31061
23.5	3.23722	2.67124	23.5	1.71093	2.27664
23.52	3.20083	2.62751	23.52	1.6963	2.02524
23.54	3.1694	2.6435	23.54	1.69937	2.54452
23.56	3.21904	2.50224	23.56	1.72979	2.27361
23.58	3.17788	2.43101	23.58	1.82495	2.45167
23.6	3.16047	2.39179	23.6	1.6691	2.57254
23.62	3.23388	2.21205	23.62	1.70547	2.38183
23.64	3.23102	2.62183	23.64	1.66663	2.46931
23.66	3.2374	2.60972	23.66	1.74772	2.4414
23.68	3.33252	2.51004	23.68	1.70867	2.10198
23.7	3.14492	2.60351	23.7	1.7033	2.26311
23.72	3.35509	2.51608	23.72	1.67164	2.45873
23.74	3.3523	2.42324	23.74	1.69156	2.4828
23.76	3.35465	2.70169	23.76	1.71124	2.5079
23.78	3.41632	2.57796	23.78	1.70441	2.51706
23.8	3.26754	2.72935	23.8	1.73186	2.65409
23.82	3.221	2.67314	23.82	1.63383	2.49672
23.84	3.18701	2.51316	23.84	1.67223	2.53078
23.86	3.24514	2.46412	23.86	1.67937	2.6031
23.88	3.16089	2.59829	23.88	1.73259	2.39106
23.9	2.99671	2.35586	23.9	1.74095	2.4602
23.92	3.07327	2.75942	23.92	1.75184	2.50871
23.94	2.9685	2.6331	23.94	1.71184	2.26005
23.96	3.12821	2.68508	23.96	1.71742	2.48397
23.98	3.11022	2.4788	23.98	1.70996	2.47914
24	3.08944	2.45806	24	1.7378	2.45104
24.02	3.14307	2.44441	24.02	1.75524	2.32513
24.04	3.10159	2.60888	24.04	1.72208	2.51569
24.06	3.18281	2.57163	24.06	1.69098	2.40071
24.08	3.14919	2.48025	24.08	1.73841	2.3734
24.1	3.17695	2.59517	24.1	1.77334	2.57603
24.12	3.2558	2.58594	24.12	1.80532	2.60034
24.14	3.45295	2.67909	24.14	1.83243	2.46402
24.16	3.45597	2.73643	24.16	1.8298	2.57716
24.18	3.49506	2.69571	24.18	1.8089	2.56845
24.2	3.35303	2.56853	24.2	1.90798	2.45736
24.22	3.55408	2.48142	24.22	1.78164	2.40157
24.24	3.44456	2.41437	24.24	1.77096	2.25514
24.26	3.40557	2.67429	24.26	1.75486	2.0833
24.28	3.26014	2.34179	24.28	1.71183	2.34049
24.3	3.22531	2.664	24.3	1.76684	2.33032
24.32	3.09145	2.59811	24.32	1.68917	2.61467
24.34	3.06924	2.42826	24.34	1.64956	2.45667
24.36	3.09724	2.31868	24.36	1.65402	2.36589
24.38	3.22843	2.52937	24.38	1.65531	2.08906
24.4	3.22076	2.45983	24.4	1.60686	2.28479
24.42	3.1894	2.71446	24.42	1.69161	2.21861
24.44	3.22654	2.45479	24.44	1.57651	2.54258
24.46	3.21855	2.42146	24.46	1.59004	2.363
24.48	3.23295	2.51129	24.48	1.56145	2.39304
24.5	3.25132	2.40088	24.5	1.50129	2.39377
24.52	3.32663	2.69231	24.52	1.56867	2.26506
24.54	3.19865	2.57747	24.54	1.6762	2.18787
24.56	3.09559	2.30122	24.56	1.58448	2.26097
24.58	3.171	2.58812	24.58	1.54803	2.4209
24.6	3.25904	2.68344	24.6	1.56796	2.18412
24.62	3.17329	2.41847	24.62	1.52177	2.04637
24.64	3.49274	2.5031	24.64	1.49332	2.2614
24.66	3.28413	2.532	24.66	1.53111	2.50846
24.68	3.28657	2.51905	24.68	1.50519	2.61704
24.7	3.35886	2.45265	24.7	1.52234	2.455
24.72	3.48977	2.58537	24.72	1.50897	2.3285
24.74	3.64074	2.61069	24.74	1.5574	2.5246
24.76	3.59773	2.4258	24.76	1.48739	2.5254
24.78	3.59508	2.5819	24.78	1.48916	2.48813
24.8	3.66188	2.46255	24.8	1.54957	2.6663
24.82	3.67388	2.52559	24.82	1.55849	2.51942
24.84	3.55907	2.70226	24.84	1.55245	2.33323
24.86	3.63079	2.60269	24.86	1.52626	2.27845
24.88	3.5887	2.58406	24.88	1.63727	2.20088
24.9	3.70719	2.48617	24.9	1.58965	2.39716
24.92	3.63259	2.65982	24.92	1.73702	2.35814
24.94	3.57732	2.7212	24.94	1.5916	2.20793
24.96	3.59122	2.54478	24.96	1.60939	2.23651
24.98	3.60416	2.72338	24.98	1.75451	2.37019
25	3.59599	2.6731	25	1.64136	2.44063
25.02	3.47006	2.76629	25.02	1.54336	2.52521
25.04	3.66791	2.80667	25.04	1.58244	2.59736
25.06	3.59986	2.65468	25.06	1.52911	2.4094
25.08	3.67414	2.57166	25.08	1.64938	2.32894
25.1	3.73959	2.49467	25.1	1.65863	2.04475
25.12	3.64071	2.71528	25.12	1.7018	2.2114
25.14	3.5776	2.54681	25.14	1.62352	2.29735
25.16	3.66516	2.55693	25.16	1.57641	2.32282
25.18	3.95778	2.46264	25.18	1.58763	2.32373
25.2	3.97807	2.63458	25.2	1.65484	2.3308
25.22	3.94671	2.79435	25.22	1.73664	2.4798
25.24	3.84924	2.17167	25.24	1.70678	2.43191
25.26	3.77644	2.27187	25.26	1.66769	2.36133
25.28	3.89021	2.15376	25.28	1.67482	2.19782
25.3	3.6916	2.26161	25.3	1.72471	2.34755
25.32	3.83294	2.68165	25.32	1.61566	2.29478
25.34	3.59289	2.54093	25.34	1.59429	2.34925
25.36	3.63532	2.42612	25.36	1.66936	2.35971
25.38	3.79727	2.56763	25.38	1.62969	2.24968
25.4	3.66655	2.37637	25.4	1.6207	2.25151
25.42	3.67567	2.25497	25.42	1.62864	2.09174
25.44	3.76661	2.36357	25.44	1.74679	2.42767
25.46	3.76632	2.42813	25.46	1.85082	2.4457
25.48	3.74198	2.57806	25.48	1.76661	2.48862
25.5	3.67606	2.42346	25.5	1.73027	2.33055
25.52	3.77174	2.24319	25.52	1.68021	2.10463
25.54	3.70502	2.26628	25.54	1.8373	2.46297
25.56	3.70966	2.09726	25.56	1.77453	2.46897
25.58	3.64516	2.23226	25.58	1.71269	2.65367
25.6	3.72424	2.23146	25.6	1.72829	2.32258
25.62	3.78449	2.3052	25.62	1.7841	2.43554
25.64	3.83494	2.54139	25.64	1.78448	2.56917
25.66	4.00592	2.45364	25.66	1.81632	2.49145
25.68	4.0308	2.75113	25.68	1.84615	2.37494
25.7	3.89848	2.46095	25.7	1.87885	2.48298
25.72	4.05851	2.45294	25.72	1.80775	2.4437
25.74	4.24707	2.70235	25.74	1.77034	2.57613
25.76	4.16493	2.51315	25.76	1.67802	2.42781
25.78	4.11123	2.36378	25.78	1.79058	2.43044
25.8	4.22082	2.45977	25.8	1.82537	2.50366
25.82	4.22685	2.39989	25.82	1.78351	2.37957
25.84	4.25813	2.62069	25.84	1.76525	2.61607
25.86	3.99842	2.45177	25.86	1.65053	2.31172
25.88	4.33021	2.36963	25.88	1.68493	2.50186
25.9	4.24458	2.30277	25.9	1.74683	2.27402
25.92	4.30836	2.34747	25.92	1.67809	2.4126
25.94	4.28082	2.38143	25.94	1.6749	2.49174
25.96	4.39511	2.57787	25.96	1.66847	2.27813
25.98	4.2577	2.37253	25.98	1.77613	2.30222
26	4.20776	2.4605	26	1.73131	2.57453
26.02	4.33577	2.58959	26.02	1.75546	2.41823
26.04	4.23996	2.59876	26.04	1.66631	2.43661
26.06	4.35196	2.44639	26.06	1.67421	2.48693
26.08	4.2789	2.64	26.08	1.76147	2.43799
26.1	4.24751	2.4645	26.1	1.77876	2.29652
26.12	4.21254	2.30699	26.12	1.76443	2.33453
26.14	4.25065	2.52063	26.14	1.71572	2.42309
26.16	4.23936	2.44631	26.16	1.74455	2.41737
26.18	4.32348	2.35871	26.18	1.69758	2.33191
26.2	4.15186	2.55986	26.2	1.66705	2.37255
26.22	4.17382	2.28271	26.22	1.70069	2.53303
26.24	4.24922	2.30114	26.24	1.69095	2.52577
26.26	4.14612	2.48804	26.26	1.69876	2.51466
26.28	4.23702	2.56306	26.28	1.86497	2.38928
26.3	4.29228	2.31092	26.3	1.75339	2.33304
26.32	4.26322	2.43504	26.32	1.83272	2.27207
26.34	4.31059	2.50665	26.34	1.80219	2.39566
26.36	4.21117	2.38574	26.36	1.87488	2.54868
26.38	4.23913	2.60298	26.38	1.63426	2.68968
26.4	4.16416	2.42274	26.4	1.7237	2.56599
26.42	4.26123	2.50715	26.42	1.65396	2.72171
26.44	4.24435	2.12729	26.44	1.81382	2.25264
26.46	4.21709	2.48002	26.46	1.76886	2.36727
26.48	4.18782	2.22381	26.48	1.84065	2.42915
26.5	4.29525	2.27092	26.5	1.73674	2.313
26.52	4.25519	2.51712	26.52	1.67366	2.34532
26.54	4.28109	2.53039	26.54	1.76464	2.56161
26.56	4.2019	2.10258	26.56	1.76182	2.35411
26.58	4.09527	2.58011	26.58	1.7875	2.66365
26.6	4.14499	2.40419	26.6	1.78917	2.4182
26.62	4.03422	2.69915	26.62	1.81061	2.30217
26.64	4.14062	2.35873	26.64	1.82494	2.38404
26.66	4.1743	2.54985	26.66	1.79235	2.74262
26.68	4.14209	2.53682	26.68	1.68943	2.38111
26.7	4.10666	2.44384	26.7	1.77427	2.419
26.72	4.12634	2.48232	26.72	1.72313	2.55069
26.74	4.20954	2.33661	26.74	1.78887	2.09318
26.76	4.13324	2.24847	26.76	1.83669	2.51764
26.78	4.13908	2.36744	26.78	1.8154	2.32623
26.8	4.11364	2.43021	26.8	1.66918	2.49567
26.82	4.31989	2.40949	26.82	1.7365	2.43546
26.84	4.28715	2.28052	26.84	1.80931	2.60786
26.86	4.29229	2.36585	26.86	1.78798	2.32446
26.88	4.11639	2.26446	26.88	1.83844	2.40583
26.9	4.18209	2.35454	26.9	1.79742	2.39403
26.92	4.30588	2.27442	26.92	1.7854	2.29702
26.94	4.271	2.20353	26.94	1.85323	2.20133
26.96	4.2166	2.74647	26.96	1.86725	2.47232
26.98	4.26511	2.69989	26.98	1.75072	2.10456
27	4.02202	2.64867	27	1.76777	2.00637
27.02	4.06412	2.53961	27.02	1.63393	2.3851
27.04	4.16124	2.7712	27.04	1.69145	2.44021
27.06	4.28597	2.77598	27.06	1.85689	2.4924
27.08	4.20127	2.70323	27.08	1.78399	2.52726
27.1	4.08811	2.62951	27.1	1.79227	2.47271
27.12	4.14477	2.54298	27.12	1.87597	2.34941
27.14	4.21456	2.43122	27.14	1.83799	2.3921
27.16	4.27551	2.52106	27.16	1.80812	2.3891
27.18	4.34345	2.65936	27.18	1.74285	2.36887
27.2	4.20128	2.47826	27.2	1.79716	2.26499
27.22	4.14795	2.72398	27.22	1.78274	2.3389
27.24	4.06124	2.55488	27.24	1.77015	2.36289
27.26	4.17164	2.69964	27.26	1.76569	2.14929
27.28	4.08363	2.72714	27.28	1.73984	2.54284
27.3	4.04665	2.50766	27.3	1.84865	2.5696
27.32	4.07885	2.30713	27.32	1.80255	2.52887
27.34	4.10512	2.28863	27.34	1.89082	2.27673
27.36	4.18826	2.33671	27.36	1.81933	2.59285
27.38	4.0766	2.51013	27.38	1.74357	2.37174
27.4	4.1599	2.24989	27.4	1.77111	2.45504
27.42	4.0631	2.11972	27.42	1.80187	2.46962
27.44	4.16489	2.33723	27.44	1.79375	2.30936
27.46	4.0533	2.33631	27.46	1.83779	2.43626
27.48	4.02702	2.70757	27.48	2.02392	2.37469
27.5	4.09516	2.47467	27.5	1.97627	2.27765
27.52	4.12866	2.18111	27.52	1.86374	2.46474
27.54	4.26473	2.33562	27.54	1.87148	2.23463
27.56	4.13967	2.67166	27.56	1.77484	2.25262
27.58	4.25106	2.58887	27.58	1.73201	2.09054
27.6	4.15136	2.42375	27.6	1.74944	2.41609
27.62	4.29764	2.58548	27.62	1.81537	2.49351
27.64	4.1633	2.48366	27.64	1.77977	2.21375
27.66	4.20095	2.44813	27.66	1.84087	2.41431
27.68	4.19591	2.55525	27.68	1.77884	2.44813
27.7	4.10397	2.49861	27.7	1.86292	2.4841
27.72	4.24657	2.55469	27.72	1.80157	2.49784
27.74	4.17738	2.59604	27.74	1.75889	2.29552
27.76	4.35316	2.49634	27.76	1.79683	2.40188
27.78	4.29302	2.32281	27.78	1.71509	2.42032
27.8	4.24804	2.5296	27.8	1.71434	2.55355
27.82	4.33702	2.60552	27.82	1.78192	2.45077
27.84	4.27067	2.33686	27.84	1.76506	2.52755
27.86	4.28129	2.56696	27.86	1.86808	2.38768
27.88	4.31994	2.51126	27.88	1.91757	2.45546
27.9	4.34624	2.08459	27.9	1.8118	2.44078
27.92	4.35321	2.37354	27.92	1.91458	2.4179
27.94	4.35304	2.44673	27.94	1.90069	2.62319
27.96	4.32917	2.44713	27.96	1.91986	2.59726
27.98	4.26101	2.32175	27.98	1.92335	2.53495
28	4.11658	2.36719	28	1.81165	2.49129
28.02	4.0333	2.30356	28.02	1.87028	2.47469
28.04	4.00609	2.52292	28.04	1.9458	2.42967
28.06	4.09943	2.58512	28.06	1.82331	2.42477
28.08	4.14048	2.57267	28.08	1.78693	2.36935
28.1	4.16363	2.52367	28.1	1.71072	2.39631
28.12	4.07057	2.65438	28.12	1.76781	2.47693
28.14	3.95959	2.67566	28.14	1.83848	2.61708
28.16	4.11414	2.51879	28.16	1.84321	2.43387
28.18	3.99291	2.64454	28.18	1.91847	2.63808
28.2	4.01435	2.38754	28.2	1.91807	2.61825
28.22	4.08239	2.42205	28.22	1.80625	2.64475
28.24	4.1031	2.60566	28.24	1.88941	2.48856
28.26	4.13191	2.75125	28.26	1.76645	2.4931
28.28	4.20006	2.81897	28.28	1.79159	2.4724
28.3	4.13176	2.42447	28.3	1.71225	2.59039
28.32	4.1654	2.53192	28.32	1.67338	2.371
28.34	4.1135	2.56602	28.34	1.70504	2.22701
28.36	4.25952	2.45824	28.36	1.74141	2.36733
28.38	4.01103	2.28795	28.38	1.64033	2.35493
28.4	4.09052	2.41574	28.4	1.63928	1.95723
28.42	3.9711	2.46954	28.42	1.80184	2.64874
28.44	4.00774	2.52042	28.44	1.70348	2.4181
28.46	4.11877	2.64223	28.46	1.77262	2.71872
28.48	4.11087	2.53705	28.48	1.78384	2.48312
28.5	4.13027	2.45329	28.5	1.77213	2.62286
28.52	4.01809	2.42042	28.52	1.74775	2.54801
28.54	4.21708	2.41949	28.54	1.6973	2.45761
28.56	4.14105	2.53162	28.56	1.73664	2.4714
28.58	4.17171	2.75621	28.58	1.64629	2.57857
28.6	4.04472	2.80461	28.6	1.74757	2.50254
28.62	4.19852	2.56072	28.62	1.7373	2.49819
28.64	4.30077	2.68791	28.64	1.77138	2.61434
28.66	4.17868	2.77196	28.66	1.81672	2.37462
28.68	4.22861	2.62015	28.68	1.79816	2.68847
28.7	4.22199	2.30468	28.7	1.83187	2.45867
28.72	4.11641	2.22034	28.72	1.72124	2.37749
28.74	4.29089	2.39403	28.74	1.74749	2.42819
28.76	4.24546	2.47847	28.76	1.75624	2.31934
28.78	4.18015	2.37832	28.78	1.68095	2.31248
28.8	4.22013	2.54874	28.8	1.64553	2.49498
28.82	4.21201	2.52275	28.82	1.71613	2.3083
28.84	4.39906	2.47732	28.84	1.64729	2.41917
28.86	4.32922	2.58301	28.86	1.62886	2.54769
28.88	4.2632	2.40745	28.88	1.63672	2.44419
28.9	4.44112	2.54607	28.9	1.63409	2.35827
28.92	4.53898	2.27766	28.92	1.61898	2.5348
28.94	4.3696	2.3895	28.94	1.69421	2.53524
28.96	4.28398	2.4029	28.96	1.59192	2.43137
28.98	4.29329	2.49382	28.98	1.55419	2.56483
29	4.1758	2.53036	29	1.76416	2.49709
29.02	4.21895	2.34695	29.02	1.68682	2.41334
29.04	4.00925	2.45338	29.04	1.73268	2.34192
29.06	4.04098	2.81593	29.06	1.73614	2.5491
29.08	4.16444	2.68699	29.08	1.87463	2.50186
29.1	4.15764	2.62974	29.1	1.75589	2.39727
29.12	4.19733	2.70682	29.12	1.75925	2.45695
29.14	4.13362	2.54091	29.14	1.74799	2.48024
29.16	4.33497	2.65724	29.16	1.71139	2.50704
29.18	4.34329	2.67542	29.18	1.73168	2.3646
29.2	4.12853	2.63525	29.2	1.80096	2.46665
29.22	4.15353	2.59111	29.22	1.75497	2.59266
29.24	4.25784	2.61184	29.24	1.79666	2.57362
29.26	4.27576	2.79861	29.26	1.80705	2.60095
29.28	4.17054	2.59748	29.28	1.82071	2.58086
29.3	4.24154	2.60425	29.3	1.76466	2.56814
29.32	4.29969	2.52248	29.32	1.97262	2.49493
29.34	4.20681	2.50514	29.34	1.82172	2.30275
29.36	4.15055	2.28082	29.36	1.80876	2.6272
29.38	4.08361	2.66392	29.38	1.80613	2.07064
29.4	4.10465	2.51008	29.4	1.69688	2.591
29.42	4.13702	2.58449	29.42	1.724	2.54584
29.44	4.18894	2.19814	29.44	1.77231	2.36769
29.46	4.10313	2.20753	29.46	1.7482	2.49453
29.48	4.07453	2.29191	29.48	1.76867	2.43027
29.5	4.08603	2.35611	29.5	1.7411	2.58888
29.52	4.0228	2.22913	29.52	1.79246	2.55628
29.54	4.24349	2.21367	29.54	1.79857	2.4365
29.56	4.15916	2.63771	29.56	1.7303	2.45269
29.58	4.23945	2.23438	29.58	1.69915	2.27058
29.6	4.22252	2.54954	29.6	1.73647	2.60231
29.62	4.08198	2.5545	29.62	1.79862	2.60443
29.64	4.16143	2.47428	29.64	1.8942	2.4836
29.66	4.05061	2.56333	29.66	1.78227	2.37555
29.68	4.04245	2.68366	29.68	1.72631	2.57572
29.7	4.02833	2.68265	29.7	1.80806	2.31431
29.72	3.97995	2.80857	29.72	1.82525	2.61608
29.74	4.02243	2.48447	29.74	1.80208	2.42262
29.76	3.97295	2.37122	29.76	1.79692	2.70397
29.78	3.99943	2.39309	29.78	1.7784	2.46288
29.8	4.16094	2.33506	29.8	1.72657	2.61687
29.82	4.2826	2.20727	29.82	1.77392	2.68779
29.84	4.14566	2.53058	29.84	1.88749	2.53734
29.86	4.12374	2.27938	29.86	1.99062	2.36128
29.88	4.22437	2.42613	29.88	1.9103	2.68554
29.9	4.16533	2.40498	29.9	1.81078	2.42893
29.92	4.17684	2.35711	29.92	1.93138	2.6075
29.94	4.33798	2.40316	29.94	1.81744	2.47549
29.96	4.37705	2.47395	29.96	1.80059	2.29144
29.98	4.35784	2.24793	29.98	1.82891	2.38852
30	4.34724	2.49246	30	1.85526	2.45644
30.02	4.29788	2.39212	30.02	1.87018	2.50454
30.04	4.27998	2.22056	30.04	1.76042	2.63626
30.06	4.30463	2.43141	30.06	1.7225	2.5198
30.08	4.35544	2.28095	30.08	1.82537	2.38798
30.1	4.39654	2.40128	30.1	1.75871	2.63411
30.12	4.35606	2.36368	30.12	1.81933	2.48117
30.14	4.36547	2.43675	30.14	1.79961	2.498
30.16	4.36731	2.50378	30.16	1.80145	2.30308
30.18	4.3427	2.52732	30.18	1.66451	2.37151
30.2	4.32238	2.65674	30.2	1.74715	2.47938
30.22	4.44752	2.65682	30.22	1.84395	2.58527
30.24	4.44141	2.36762	30.24	1.79178	2.5065
30.26	4.37851	2.28854	30.26	1.7926	2.44342
30.28	4.24271	2.37572	30.28	1.85364	2.56249
30.3	4.29892	2.3989	30.3	1.78832	2.51361
30.32	4.46507	2.48631	30.32	1.78499	2.5207
30.34	4.42302	2.28182	30.34	1.7455	2.60059
30.36	4.28259	2.4196	30.36	1.81365	2.72699
30.38	4.15589	2.46043	30.38	1.76127	2.64925
30.4	4.12336	2.28055	30.4	1.72102	2.63036
30.42	4.22048	2.23103	30.42	1.70182	2.49692
30.44	4.30388	2.30665	30.44	1.79766	2.55703
30.46	4.10666	2.38604	30.46	1.76657	2.52911
30.48	4.14239	2.29627	30.48	1.86991	2.4569
30.5	4.17413	2.40802	30.5	1.86547	2.53204
30.52	4.08639	2.40989	30.52	1.84066	2.5377
30.54	4.33984	2.55592	30.54	1.83335	2.56674
30.56	4.20304	2.24017	30.56	1.75724	2.52271
30.58	4.2301	2.52591	30.58	1.80492	2.60011
30.6	4.29959	2.65052	30.6	1.70878	2.58259
30.62	4.18974	2.43981	30.62	1.8509	2.49652
30.64	4.09209	2.28882	30.64	1.87111	2.5649
30.66	4.18148	2.09768	30.66	1.78531	2.50994
30.68	4.09807	2.31067	30.68	1.7546	2.16378
30.7	4.14719	2.38115	30.7	1.83166	2.26649
30.72	3.80142	2.34785	30.72	1.80147	2.42759
30.74	3.91033	2.549	30.74	1.8025	2.44901
30.76	3.98008	2.6373	30.76	1.77777	2.24205
30.78	3.88951	2.34553	30.78	1.8134	2.3304
30.8	4.00735	2.74463	30.8	1.78258	2.35302
30.82	3.9736	2.53355	30.82	1.82658	2.49114
30.84	3.85227	2.39094	30.84	1.73503	2.49414
30.86	3.74715	2.59822	30.86	1.83753	2.59022
30.88	3.75163	2.83327	30.88	1.81194	2.56661
30.9	3.85542	2.73945	30.9	1.85324	2.48646
30.92	3.7437	2.47004	30.92	1.76568	2.5675
30.94	3.8192	2.66962	30.94	1.77378	2.44309
30.96	3.81181	2.57686	30.96	1.85754	2.46926
30.98	3.70585	2.51692	30.98	1.72666	2.49997
31	3.63369	2.41577	31	1.72387	2.41014
31.02	3.6274	2.57464	31.02	1.80074	2.4765
31.04	3.71851	2.60115	31.04	1.73116	2.56588
31.06	3.78586	2.41653	31.06	1.92094	2.42627
31.08	3.67783	2.71608	31.08	1.79263	2.25491
31.1	3.66826	2.51536	31.1	1.80672	2.58569
31.12	3.44695	2.48855	31.12	1.8603	2.52957
31.14	3.62364	2.47865	31.14	1.94005	2.6349
31.16	3.40794	2.16914	31.16	1.80688	2.47507
31.18	3.66229	2.35016	31.18	1.79499	2.57708
31.2	3.49019	2.39779	31.2	1.8114	2.6199
31.22	3.5255	2.81189	31.22	1.89974	2.63287
31.24	3.73666	2.61592	31.24	1.78599	2.50327
31.26	3.67681	2.75692	31.26	1.83884	2.43955
31.28	3.59423	2.47785	31.28	1.86928	2.67312
31.3	3.51686	2.79281	31.3	1.79084	2.39025
31.32	3.60107	2.54025	31.32	1.84429	2.45912
31.34	3.55312	2.39735	31.34	1.8166	2.39569
31.36	3.61112	2.18845	31.36	1.95634	2.42552
31.38	3.51235	2.40635	31.38	1.91611	2.53063
31.4	3.47917	2.30803	31.4	1.86325	2.58991
31.42	3.37603	2.40632	31.42	1.77997	2.59482
31.44	3.37908	2.38527	31.44	1.79388	2.37652
31.46	3.32881	2.25611	31.46	1.864	2.52673
31.48	3.35341	2.3573	31.48	1.84772	2.74666
31.5	3.35584	2.42188	31.5	1.82843	2.44059
31.52	3.35524	2.39295	31.52	1.73736	2.58531
31.54	3.44108	2.593	31.54	1.80314	2.559
31.56	3.49556	2.72678	31.56	1.78071	2.46553
31.58	3.50641	2.82779	31.58	1.77707	2.49646
31.6	3.58896	2.87667	31.6	1.87971	2.78336
31.62	3.44933	2.64904	31.62	1.74908	2.56486
31.64	3.53644	2.71239	31.64	1.73934	2.32112
31.66	3.40853	2.38519	31.66	1.80574	2.51014
31.68	3.381	2.24567	31.68	1.8277	2.49687
31.7	3.4467	2.46454	31.7	1.82512	2.48681
31.72	3.33052	2.37542	31.72	1.79612	2.44219
31.74	3.32242	2.00145	31.74	1.84658	2.55597
31.76	3.49765	2.45305	31.76	1.89411	2.50778
31.78	3.3475	2.49828	31.78	1.84315	2.59211
31.8	3.58836	2.50568	31.8	1.85919	2.39909
31.82	3.49672	2.5171	31.82	1.83884	2.37116
31.84	3.535	2.39913	31.84	1.75809	2.55036
31.86	3.53995	2.38313	31.86	1.91466	2.47519
31.88	3.61453	2.55528	31.88	1.84731	2.53044
31.9	3.5775	2.57864	31.9	1.87706	2.59637
31.92	3.38743	2.69155	31.92	1.83046	2.36421
31.94	3.35876	2.53558	31.94	1.87745	2.45118
31.96	3.39873	2.64691	31.96	1.75294	2.55123
31.98	3.45407	2.45954	31.98	1.80428	2.33261
32	3.55109	2.56581	32	1.81117	2.53437
32.02	3.52284	2.55621	32.02	1.8126	2.38662
32.04	3.60709	2.61057	32.04	1.71278	2.34541
32.06	3.56742	2.46409	32.06	1.83316	2.52216
32.08	3.6896	2.40067	32.08	1.76977	2.40675
32.1	3.5886	2.43659	32.1	1.81929	2.64675
32.12	3.56308	2.56992	32.12	1.79305	2.28412
32.14	3.73297	2.38449	32.14	1.82271	2.44085
32.16	3.71996	2.39089	32.16	1.88379	2.29627
32.18	3.86784	2.27303	32.18	1.75694	2.43508
32.2	3.82809	2.52383	32.2	1.78286	2.51306
32.22	4.01383	2.41779	32.22	1.79007	2.57549
32.24	3.74343	2.3517	32.24	1.71616	2.41235
32.26	3.43566	2.52801	32.26	1.71464	2.44755
32.28	3.69824	2.31868	32.28	1.73296	2.44556
32.3	3.64644	2.45607	32.3	1.65553	2.55299
32.32	3.63259	2.52584	32.32	1.70382	2.43471
32.34	3.43229	2.50998	32.34	1.79106	2.50698
32.36	3.50276	2.64919	32.36	1.74752	2.34949
32.38	3.73821	2.4418	32.38	1.75368	2.47656
32.4	3.58942	2.44616	32.4	1.75537	2.63842
32.42	3.64981	1.9762	32.42	1.81673	2.40455
32.44	3.73735	2.29873	32.44	1.76558	2.66057
32.46	3.78216	2.41365	32.46	1.79845	2.2812
32.48	3.86035	2.42402	32.48	1.79272	2.23229
32.5	3.87254	2.34106	32.5	1.68384	2.36711
32.52	3.82293	2.61622	32.52	1.7343	2.1278
32.54	3.77428	2.43397	32.54	1.67338	2.22251
32.56	3.59198	2.34991	32.56	1.74629	2.16317
32.58	3.88389	2.25637	32.58	1.92279	2.40005
32.6	3.85102	2.62665	32.6	1.88466	2.2612
32.62	3.87067	2.32187	32.62	1.75312	2.4314
32.64	3.80984	2.44927	32.64	1.74043	2.23759
32.66	3.76221	2.56314	32.66	1.79192	2.2027
32.68	3.83688	2.51144	32.68	1.70512	2.03446
32.7	3.66509	2.46616	32.7	1.70637	2.11436
32.72	3.6897	2.39047	32.72	1.65475	1.89242
32.74	3.78391	2.64683	32.74	1.76303	2.37407
32.76	3.58468	2.65481	32.76	1.74935	2.50229
32.78	3.50377	2.58408	32.78	1.70717	2.48429
32.8	3.48382	2.6426	32.8	1.73005	2.4618
32.82	3.51142	2.44944	32.82	1.68825	2.58233
32.84	3.51686	2.52905	32.84	1.71293	2.23552
32.86	3.47495	2.54493	32.86	1.71434	2.48415
32.88	3.49014	2.57076	32.88	1.71636	2.36303
32.9	3.43104	2.51778	32.9	1.64712	2.35539
32.92	3.53376	2.8717	32.92	1.74279	2.36432
32.94	3.44797	2.58122	32.94	1.75694	2.53727
32.96	3.47541	2.45118	32.96	1.97833	2.67696
32.98	3.60935	2.36634	32.98	1.85814	2.5734
33	3.42918	2.34012	33	1.89649	2.6474
33.02	3.48435	2.28926	33.02	1.84555	2.50568
33.04	3.78385	2.24513	33.04	1.86418	2.43997
33.06	3.78358	2.3736	33.06	1.91894	2.5824
33.08	3.99404	2.73412	33.08	1.88896	2.46363
33.1	3.88155	2.61415	33.1	1.77074	2.31533
33.12	3.74696	2.70672	33.12	1.87224	2.46047
33.14	3.74511	2.56669	33.14	1.8508	2.54657
33.16	3.69382	2.54599	33.16	1.79169	2.65135
33.18	3.69095	2.81478	33.18	1.80353	2.58517
33.2	3.53412	2.62179	33.2	1.81109	2.65509
33.22	3.66492	2.84997	33.22	1.83814	2.72059
33.24	3.56937	2.63075	33.24	1.79233	2.75807
33.26	3.57482	2.28498	33.26	1.84586	2.63193
33.28	3.82251	2.26812	33.28	1.79207	2.53853
33.3	3.6936	2.46916	33.3	1.81921	2.53192
33.32	3.67893	2.26932	33.32	1.81912	2.44929
33.34	3.82328	2.45428	33.34	1.82386	2.52696
33.36	3.62035	2.55367	33.36	1.83977	2.41895
33.38	3.60356	2.5793	33.38	1.93171	2.43737
33.4	3.68214	2.47419	33.4	1.85493	2.62961
33.42	3.84095	2.67107	33.42	1.90235	2.56965
33.44	3.82968	2.50616	33.44	1.74378	2.65568
33.46	3.62256	2.66959	33.46	1.86889	2.50324
33.48	3.68195	2.7031	33.48	1.82999	2.65482
33.5	3.63639	2.70552	33.5	1.73317	2.55309
33.52	3.56437	2.42668	33.52	1.81495	2.42668
33.54	3.57831	2.63101	33.54	1.72951	2.42349
33.56	3.72761	2.60934	33.56	1.76371	2.45958
33.58	3.69941	2.70066	33.58	1.78817	2.56541
33.6	3.69621	2.61742	33.6	1.91165	2.45741
33.62	3.55961	2.51272	33.62	1.81173	2.38564
33.64	3.5601	2.60966	33.64	1.81373	2.38311
33.66	3.65786	2.61707	33.66	1.77982	2.36789
33.68	3.70755	2.61339	33.68	1.81647	2.511
33.7	3.62177	2.6764	33.7	1.76077	2.46298
33.72	3.71587	2.74039	33.72	1.86206	2.44964
33.74	3.61594	2.76694	33.74	1.78096	2.15406
33.76	3.64418	2.68317	33.76	1.78787	2.47305
33.78	3.71659	2.48563	33.78	1.62997	2.58941
33.8	3.66067	2.78957	33.8	1.77427	2.52535
33.82	3.54926	2.53321	33.82	1.73944	2.62824
33.84	3.53169	2.68496	33.84	1.73735	2.43899
33.86	3.62342	2.75182	33.86	1.77028	2.68244
33.88	3.66903	2.62284	33.88	1.68388	2.5467
33.9	3.79641	2.65998	33.9	1.84392	2.56038
33.92	3.69581	2.67781	33.92	1.82319	2.31786
33.94	3.81286	2.78779	33.94	1.86956	2.57567
33.96	3.74983	2.46764	33.96	1.93357	2.37948
33.98	3.75275	2.40775	33.98	1.87485	2.39698
34	3.75559	2.64064	34	1.77225	2.42974
34.02	3.69062	2.66019	34.02	1.80542	2.37887
34.04	3.63684	2.38215	34.04	1.8673	2.24955
34.06	3.55178	2.47893	34.06	1.89363	2.44873
34.08	3.63092	2.18279	34.08	1.76367	2.49818
34.1	3.90244	2.25289	34.1	1.86384	2.53346
34.12	3.97049	2.52499	34.12	1.83531	2.52068
34.14	3.77271	2.51015	34.14	1.73869	2.19281
34.16	3.70368	2.56375	34.16	1.7515	2.59718
34.18	3.76789	2.74106	34.18	1.84175	2.3038
34.2	3.86816	2.70699	34.2	1.74683	2.47407
34.22	3.87466	2.54619	34.22	1.73522	2.52476
34.24	3.8387	2.61362	34.24	1.76628	2.27981
34.26	3.72708	2.5573	34.26	1.8373	2.48862
34.28	3.89382	2.86436	34.28	1.82913	2.69996
34.3	3.65071	2.6463	34.3	1.8384	2.43819
34.32	3.60713	2.59299	34.32	1.81104	2.55262
34.34	3.69638	2.55638	34.34	1.74836	2.52725
34.36	3.76162	2.69333	34.36	1.81888	2.61474
34.38	3.67614	2.51022	34.38	1.82188	2.57767
34.4	3.71732	2.58935	34.4	1.8295	2.54854
34.42	3.71124	2.70201	34.42	1.85	2.55242
34.44	3.8221	2.6431	34.44	1.80392	2.79326
34.46	3.78267	2.73987	34.46	1.7553	2.46973
34.48	3.90134	2.70209	34.48	1.7372	2.40992
34.5	3.81079	2.65186	34.5	1.84671	2.54711
34.52	3.91623	2.71527	34.52	1.88694	2.6528
34.54	3.85434	2.69776	34.54	1.92715	2.55009
34.56	3.86062	2.63086	34.56	1.90931	2.50913
34.58	3.8251	2.55224	34.58	1.92651	2.51656
34.6	3.83171	2.5759	34.6	1.99023	2.5595
34.62	3.90738	2.71176	34.62	1.86825	2.40131
34.64	3.80484	2.71711	34.64	1.79419	2.56211
34.66	3.88185	2.78676	34.66	1.91717	2.45879
34.68	3.89157	2.68059	34.68	1.95723	2.34627
34.7	3.79389	2.56366	34.7	1.91561	2.50258
34.72	3.93012	2.77809	34.72	1.93839	2.33822
34.74	3.78054	2.12422	34.74	1.87705	2.57443
34.76	3.85076	2.40086	34.76	1.87618	2.4474
34.78	3.84873	2.56909	34.78	1.92219	2.47806
34.8	3.9566	2.35021	34.8	1.94931	2.5051
34.82	3.93035	2.4062	34.82	1.88646	2.52154
34.84	3.96702	2.53566	34.84	1.80633	2.53913
34.86	3.72508	2.39923	34.86	1.95761	2.53817
34.88	3.87588	2.39189	34.88	1.93968	2.55878
34.9	3.94297	2.31642	34.9	1.83086	2.43162
34.92	3.81392	2.45359	34.92	1.74586	2.35004
34.94	3.98147	2.27514	34.94	1.81301	2.37214
34.96	3.88599	2.46235	34.96	1.8482	2.37394
34.98	3.89867	2.31912	34.98	1.84982	2.31904
35	3.96913	2.34545	35	1.88573	2.50951
35.02	3.78781	2.35215	35.02	1.99858	2.18251
35.04	3.71375	2.33979	35.04	1.87212	2.44017
35.06	3.71973	2.35586	35.06	1.79585	2.28385
35.08	3.6444	2.51507	35.08	1.88921	2.50308
35.1	3.61563	2.37522	35.1	1.89909	2.32442
35.12	3.69595	2.44931	35.12	1.9441	2.38051
35.14	3.43237	2.49607	35.14	2.00711	2.49217
35.16	3.56988	2.47083	35.16	1.91673	2.39445
35.18	3.78572	2.43893	35.18	1.94027	2.60219
35.2	3.73166	2.22441	35.2	1.81562	2.50203
35.22	3.73241	2.271	35.22	1.84152	2.37053
35.24	3.85837	2.52643	35.24	1.8328	2.5462
35.26	3.81965	2.29588	35.26	1.83334	2.5885
35.28	3.86111	2.36647	35.28	1.84015	2.66905
35.3	3.70231	2.43583	35.3	1.9188	2.48549
35.32	3.77492	2.30332	35.32	1.89361	2.54544
35.34	3.83184	2.25829	35.34	1.97911	2.34444
35.36	3.70113	2.36146	35.36	1.95827	2.49975
35.38	3.78136	2.42441	35.38	2.06175	2.44026
35.4	3.68238	2.13812	35.4	1.99631	2.29641
35.42	3.66404	2.13818	35.42	1.96454	2.52474
35.44	3.57749	2.43831	35.44	2.04413	2.56663
35.46	3.66765	2.40457	35.46	2.08647	2.52818
35.48	3.70332	2.45504	35.48	2.0337	2.37739
35.5	3.73112	2.28535	35.5	1.96775	2.50815
35.52	3.72954	2.36554	35.52	1.93369	2.6998
35.54	3.71049	2.32074	35.54	2.10209	2.43563
35.56	3.81837	2.33577	35.56	1.97078	2.39998
35.58	3.82079	2.25523	35.58	1.94195	2.4485
35.6	3.94768	2.25265	35.6	1.95494	2.35622
35.62	3.95295	2.22771	35.62	1.97667	2.49697
35.64	3.97911	2.20494	35.64	1.99437	2.33914
35.66	3.85902	2.30309	35.66	2.00795	2.14654
35.68	4.00859	2.39992	35.68	1.97104	2.48324
35.7	3.94575	2.59128	35.7	1.95171	2.57441
35.72	3.91473	2.30134	35.72	1.93019	2.49761
35.74	3.92813	2.41737	35.74	1.95471	2.53617
35.76	3.9236	2.25552	35.76	2.00123	2.49187
35.78	3.93155	2.23686	35.78	1.99625	2.61535
35.8	3.9029	2.47504	35.8	1.85153	2.50018
35.82	3.83676	2.35158	35.82	1.88571	2.47554
35.84	3.87142	2.42696	35.84	2.01206	2.3146
35.86	3.93764	2.26743	35.86	1.93279	2.62838
35.88	3.99946	2.23675	35.88	2.00021	2.27252
35.9	3.97214	2.28956	35.9	1.86298	2.4904
35.92	3.93755	2.25401	35.92	1.91545	2.17353
35.94	3.97729	2.45838	35.94	1.85849	2.48278
35.96	3.85606	2.30721	35.96	1.90415	2.54118
35.98	3.96608	2.25995	35.98	1.88269	2.64565
36	3.81225	2.42366	36	1.85812	2.59913
36.02	3.72363	2.44056	36.02	1.89069	2.46339
36.04	3.77626	2.32357	36.04	1.92807	2.33875
36.06	3.6259	2.33598	36.06	1.86584	2.57555
36.08	3.52375	2.35711	36.08	1.88281	2.62244
36.1	3.74562	2.32228	36.1	1.8642	2.57156
36.12	3.82335	2.38038	36.12	1.95538	2.52383
36.14	3.82151	2.40638	36.14	1.85356	2.32176
36.16	3.73028	2.32566	36.16	1.85108	2.55139
36.18	3.6393	2.07017	36.18	1.79604	2.49798
36.2	3.88361	2.27326	36.2	1.80942	2.49089
36.22	4.00755	2.33067	36.22	1.72697	2.68602
36.24	3.92536	2.08721	36.24	1.79162	2.60565
36.26	3.7947	2.46153	36.26	1.90327	2.32381
36.28	3.71977	2.27836	36.28	1.88524	2.47315
36.3	3.82137	2.56249	36.3	1.8858	2.46778
36.32	3.95198	2.23786	36.32	1.86383	2.33831
36.34	3.7626	2.27	36.34	1.78288	2.44164
36.36	3.75238	2.38524	36.36	1.80896	2.4048
36.38	3.77615	2.23133	36.38	1.89452	2.36836
36.4	3.67153	2.36099	36.4	1.85248	2.37271
36.42	3.36638	2.33544	36.42	1.86428	2.49388
36.44	3.41122	2.33404	36.44	1.86731	2.4317
36.46	3.55098	2.34692	36.46	1.82596	2.39869
36.48	3.50087	2.27195	36.48	1.89768	2.35764
36.5	3.63221	2.41933	36.5	1.94843	2.17088
36.52	3.76549	2.35179	36.52	1.93659	2.27847
36.54	3.59144	2.09419	36.54	1.99861	2.44984
36.56	3.40496	2.22053	36.56	1.80932	2.26823
36.58	3.44365	2.1255	36.58	1.88756	2.44007
36.6	3.54973	2.38379	36.6	1.80286	2.27323
36.62	3.38957	2.40557	36.62	1.87206	2.41141
36.64	3.50527	2.39762	36.64	1.91007	2.43764
36.66	3.46949	2.25635	36.66	1.84844	2.67133
36.68	3.58012	2.30163	36.68	1.95756	2.48218
36.7	3.50028	2.35274	36.7	1.8841	2.67652
36.72	3.5085	2.29814	36.72	1.928	2.33203
36.74	3.58035	2.36552	36.74	1.9599	2.38559
36.76	3.58412	2.55382	36.76	1.95082	2.50279
36.78	3.68209	2.59743	36.78	1.88295	2.4866
36.8	3.75388	2.16454	36.8	1.82719	2.36797
36.82	3.62419	2.311	36.82	1.85546	2.40854
36.84	3.53785	2.33682	36.84	1.75194	2.50377
36.86	3.47666	2.21995	36.86	1.73776	2.56791
36.88	3.65817	2.29266	36.88	1.88904	2.52778
36.9	3.58138	2.23061	36.9	1.98055	2.38414
36.92	3.49206	2.34186	36.92	1.8549	2.20959
36.94	3.47819	2.19039	36.94	1.87222	2.28117
36.96	3.39152	2.17017	36.96	1.78512	2.14889
36.98	3.57153	2.24522	36.98	1.76773	2.5353
37	3.65982	2.4257	37	1.85334	2.30097
37.02	3.6257	2.29372	37.02	1.81473	2.28678
37.04	3.65701	2.40707	37.04	1.73351	2.28399
37.06	3.60021	2.38959	37.06	1.7734	2.2917
37.08	3.62924	2.16749	37.08	1.85115	2.24305
37.1	3.66915	2.40696	37.1	1.84638	2.47461
37.12	3.59558	2.50576	37.12	1.80033	2.40951
37.14	3.44132	2.18504	37.14	1.83865	2.37986
37.16	3.53369	2.39219	37.16	1.89478	2.35407
37.18	3.34016	2.30081	37.18	1.83362	2.42293
37.2	3.65212	2.29385	37.2	1.87323	2.5456
37.22	3.42896	2.61039	37.22	1.89251	2.5864
37.24	3.57424	2.40281	37.24	1.90157	2.44115
37.26	3.58026	2.35487	37.26	1.99245	2.35911
37.28	3.72154	2.53849	37.28	1.86802	2.46906
37.3	3.45077	2.31087	37.3	1.9368	2.36875
37.32	3.57284	2.41827	37.32	1.86752	2.22981
37.34	3.5897	2.57854	37.34	1.89677	2.30287
37.36	3.5962	2.43188	37.36	1.77305	2.23872
37.38	3.76625	2.28419	37.38	1.81865	2.1791
37.4	3.57339	2.46435	37.4	1.83395	2.19853
37.42	3.53466	2.28818	37.42	1.86375	2.45379
37.44	3.6043	2.33281	37.44	1.91329	2.21668
37.46	3.64948	2.32516	37.46	1.94471	2.39963
37.48	3.68392	2.18795	37.48	1.97834	2.39037
37.5	3.45313	2.32568	37.5	1.8197	2.43906
37.52	3.55122	2.4607	37.52	1.94028	2.35178
37.54	3.47111	2.53602	37.54	1.96224	2.35879
37.56	3.44507	2.33127	37.56	1.86303	2.40326
37.58	3.49066	2.20193	37.58	1.84389	2.38587
37.6	3.44947	2.36325	37.6	1.91332	2.42966
37.62	3.46423	2.14885	37.62	1.91141	2.29731
37.64	3.48257	2.32343	37.64	1.99015	2.24316
37.66	3.5967	2.46631	37.66	1.96076	2.30551
37.68	3.59431	2.34956	37.68	1.94773	2.49092
37.7	3.62185	2.50171	37.7	1.93458	2.41168
37.72	3.44258	2.60227	37.72	1.97116	2.62137
37.74	3.51948	2.37827	37.74	1.90581	2.72613
37.76	3.58364	2.41964	37.76	1.8874	2.50424
37.78	3.61744	2.15546	37.78	1.92641	2.33106
37.8	3.64113	2.38626	37.8	1.91841	2.71909
37.82	3.59975	2.19513	37.82	2.01303	2.35794
37.84	3.52143	2.14856	37.84	1.94627	2.65446
37.86	3.80858	2.26431	37.86	1.86942	2.25226
37.88	3.66544	2.14815	37.88	1.92601	2.27785
37.9	3.89786	2.34299	37.9	1.93388	2.32589
37.92	3.84036	2.2306	37.92	1.88502	2.47192
37.94	3.72785	2.4079	37.94	1.82766	2.36298
37.96	3.79943	2.27634	37.96	1.87527	2.52032
37.98	3.92606	2.28798	37.98	1.86506	2.44571
38	3.76534	2.4113	38	1.80135	2.48826
38.02	3.99285	2.66179	38.02	1.8056	2.48956
38.04	3.71958	2.31571	38.04	1.75468	2.49382
38.06	3.70991	2.45474	38.06	1.80961	2.32023
38.08	3.81637	2.29908	38.08	1.79909	2.54924
38.1	3.58948	2.09483	38.1	1.81397	2.48775
38.12	3.77517	2.39813	38.12	1.77967	2.52748
38.14	3.87308	2.30945	38.14	1.78729	2.57705
38.16	3.81996	2.45356	38.16	1.85523	2.49864
38.18	3.96221	2.5715	38.18	1.86593	2.51682
38.2	4.00496	2.27159	38.2	1.85101	2.4681
38.22	4.18188	2.2867	38.22	1.8566	2.48497
38.24	4.01286	2.34869	38.24	1.80132	2.6079
38.26	3.88126	2.42709	38.26	1.8975	2.67294
38.28	3.83233	2.33949	38.28	1.81084	2.56666
38.3	3.78026	2.3343	38.3	1.90278	2.68099
38.32	3.90742	2.50666	38.32	1.77323	2.4141
38.34	3.93859	2.30759	38.34	1.79119	2.42527
38.36	4.0005	2.3054	38.36	1.77729	2.61461
38.38	4.0461	2.26253	38.38	1.99111	2.72743
38.4	3.86719	2.23486	38.4	1.86628	2.58037
38.42	4.03818	2.39729	38.42	1.88823	2.56284
38.44	3.9697	2.16274	38.44	1.81002	2.68682
38.46	3.99783	2.44727	38.46	1.88868	2.80633
38.48	3.90834	2.32834	38.48	1.8141	2.62869
38.5	3.79067	2.42984	38.5	1.86264	2.70757
38.52	3.75136	2.29135	38.52	1.93069	2.57969
38.54	3.84807	2.28008	38.54	1.99663	2.49668
38.56	3.97522	2.36046	38.56	2.00189	2.5838
38.58	4.01775	2.22857	38.58	2.03314	2.6429
38.6	3.80457	2.4244	38.6	2.13611	2.58133
38.62	3.89272	2.68339	38.62	2.17571	2.69165
38.64	3.83986	2.44132	38.64	2.05366	2.65949
38.66	4.06855	2.39238	38.66	2.12969	2.58714
38.68	3.98788	2.42632	38.68	2.10515	2.47809
38.7	3.93749	2.44402	38.7	2.00404	2.36509
38.72	3.79031	2.27374	38.72	1.89063	2.56603
38.74	3.83053	2.51058	38.74	2.03	2.44786
38.76	3.84461	2.24416	38.76	2.11773	2.43122
38.78	4.07368	2.41077	38.78	2.12675	2.61056
38.8	3.97669	2.27247	38.8	2.0848	2.51204
38.82	3.87906	2.25901	38.82	2.02287	2.42793
38.84	3.77049	2.21712	38.84	2.08671	2.63672
38.86	3.8097	2.19209	38.86	2.16577	2.54414
38.88	3.79502	2.23741	38.88	2.1839	2.63431
38.9	3.84561	2.10273	38.9	2.13975	2.70048
38.92	3.87242	2.15099	38.92	2.00849	2.53814
38.94	3.81297	2.18247	38.94	2.20099	2.68717
38.96	3.884	2.55461	38.96	2.10521	2.58609
38.98	3.91222	2.36964	38.98	2.11901	2.46336
39	3.95144	2.26273	39	2.13387	2.51959
39.02	3.92262	2.28499	39.02	2.05387	2.43235
39.04	4.0447	2.38222	39.04	2.23367	2.46946
39.06	3.97882	2.25313	39.06	2.19742	2.42012
39.08	3.96143	2.32546	39.08	2.13544	2.59643
39.1	3.81531	2.21235	39.1	2.13276	2.65409
39.12	3.87655	2.41541	39.12	2.04393	2.60412
39.14	3.95237	2.35248	39.14	2.13433	2.47079
39.16	3.85357	2.41316	39.16	2.18888	2.58469
39.18	3.8139	2.39628	39.18	2.12331	2.71371
39.2	3.97526	2.32643	39.2	2.13778	2.48638
39.22	4.02327	2.48476	39.22	2.04512	2.50625
39.24	3.89283	2.36431	39.24	2.05744	2.50454
39.26	3.84971	2.49595	39.26	2.05065	2.55005
39.28	3.84553	2.33857	39.28	2.00156	2.48826
39.3	3.84513	2.44861	39.3	1.98591	2.56759
39.32	3.72008	2.03294	39.32	2.01794	2.70656
39.34	3.76518	2.57069	39.34	2.064	2.55158
39.36	3.80584	2.37009	39.36	2.06329	2.38579
39.38	3.71214	2.46919	39.38	2.07881	2.56398
39.4	3.64109	2.1809	39.4	2.06084	2.34056
39.42	3.70201	2.27113	39.42	2.13887	2.54343
39.44	3.74519	2.30514	39.44	2.24382	2.3993
39.46	3.64167	2.16204	39.46	2.18631	2.39177
39.48	3.65535	2.23943	39.48	2.06814	2.45787
39.5	3.62345	2.40947	39.5	2.11923	2.30962
39.52	3.64734	2.41672	39.52	2.1278	2.34308
39.54	3.68288	2.25593	39.54	2.09581	2.44891
39.56	3.58585	2.36671	39.56	2.12255	2.52285
39.58	3.73989	2.48232	39.58	2.15544	2.60702
39.6	3.72857	2.29325	39.6	2.09258	2.75045
39.62	3.64588	2.49408	39.62	2.30753	2.3556
39.64	3.62056	2.50513	39.64	2.13391	2.42683
39.66	3.73273	2.27557	39.66	2.12477	2.60177
39.68	3.58892	2.35706	39.68	2.08761	2.42232
39.7	3.67509	2.31504	39.7	2.04653	2.5358
39.72	3.72087	2.3272	39.72	1.90481	2.58144
39.74	3.69933	2.40953	39.74	1.89264	2.47618
39.76	3.66339	2.54148	39.76	2.08176	2.64841
39.78	3.70784	2.36505	39.78	1.97117	2.41276
39.8	3.62529	2.40035	39.8	1.95942	2.6743
39.82	3.54556	2.27267	39.82	1.90072	2.62659
39.84	3.61752	2.36693	39.84	1.97075	2.55161
39.86	3.64381	2.32872	39.86	1.97363	2.5619
39.88	3.66816	2.42255	39.88	1.97704	2.58051
39.9	3.77249	2.2909	39.9	1.86111	2.44032
39.92	3.96675	2.29391	39.92	1.88202	2.61178
39.94	3.82582	2.27839	39.94	1.94169	2.45936
39.96	3.98334	2.17468	39.96	1.9803	2.36374
39.98	3.82186	2.35881	39.98	1.89263	2.30764
[truncated: 502 more rows]

## Sheet: metformin
Time (ns)	Protein_ARG1	LIG_Metformin	Time (ns)	Protein_ARG2	LIG_Metformin
0.02	0.676239	0.308528	0.02	0.569052	1.39632
0.04	0.871126	0.484016	0.04	0.733454	1.31345
0.06	1.0976	0.746678	0.06	0.664151	0.762061
0.08	1.06495	0.842383	0.08	0.859514	0.900325
0.1	1.06766	0.813065	0.1	0.896152	0.589026
0.12	1.11037	0.926143	0.12	0.837292	0.9902
0.14	1.03794	0.840994	0.14	0.846872	0.812245
0.16	0.93406	0.887124	0.16	0.869001	1.00187
0.18	1.02543	0.999318	0.18	0.859033	0.971648
0.2	0.904676	1.06534	0.2	0.819681	1.12248
0.22	0.909846	0.757549	0.22	0.884456	0.804522
0.24	1.00775	1.02723	0.24	0.896026	1.21788
0.26	1.18614	0.996829	0.26	0.88893	0.790329
0.28	1.31644	0.676251	0.28	0.956728	1.14664
0.3	1.30879	1.24085	0.3	0.952055	0.71974
0.32	1.24355	1.08752	0.32	0.91429	0.837236
0.34	1.24209	1.0062	0.34	0.909029	0.677916
0.36	1.25377	0.809269	0.36	0.938959	0.730563
0.38	1.22272	0.880892	0.38	1.01832	0.705483
0.4	1.2509	1.19132	0.4	0.92199	0.895086
0.42	1.42872	0.970997	0.42	1.04688	0.856386
0.44	1.41704	1.25932	0.44	1.10151	1.03485
0.46	1.1462	1.20876	0.46	0.931102	1.16412
0.48	1.22977	0.90225	0.48	0.957428	1.13683
0.5	1.20439	0.828499	0.5	1.00085	0.851776
0.52	1.06567	1.09256	0.52	1.00369	0.508983
0.54	1.25703	0.916282	0.54	1.03585	0.616625
0.56	1.55118	1.3418	0.56	1.05499	1.14787
0.58	1.49518	1.17198	0.58	0.948852	1.07817
0.6	1.29594	0.885389	0.6	0.960838	0.980777
0.62	1.26287	0.996571	0.62	0.98687	0.995517
0.64	1.28075	0.880065	0.64	0.951342	0.883318
0.66	1.21889	1.13618	0.66	1.00463	0.638097
0.68	1.28591	0.65639	0.68	1.01574	1.01946
0.7	1.30871	1.0226	0.7	0.977287	1.02374
0.72	1.26345	0.772446	0.72	0.963587	0.96422
0.74	1.21111	0.913713	0.74	1.0057	0.75341
0.76	1.27979	0.986311	0.76	0.987877	0.983631
0.78	1.33773	1.2661	0.78	0.988586	1.13772
0.8	1.26091	0.994282	0.8	1.11625	0.641909
0.82	1.50332	0.808482	0.82	1.07152	0.842569
0.84	1.33884	1.06541	0.84	1.00578	1.04603
0.86	1.31265	0.733221	0.86	1.08219	0.773242
0.88	1.44524	0.865051	0.88	1.04827	1.22243
0.9	1.50215	0.933314	0.9	1.11609	1.11743
0.92	1.49796	0.755834	0.92	1.14426	1.00241
0.94	1.524	0.983041	0.94	1.17437	0.946897
0.96	1.75036	1.05612	0.96	1.32807	1.24467
0.98	1.87224	1.04732	0.98	1.23305	0.874531
1	1.79632	0.869825	1	1.18662	1.08876
1.02	1.57695	0.466632	1.02	1.29061	0.955893
1.04	1.45699	0.883504	1.04	1.18898	0.997798
1.06	1.51658	0.521609	1.06	1.31305	1.33256
1.08	1.50674	0.934784	1.08	1.18297	1.14128
1.1	1.64636	0.876402	1.1	1.23952	1.45854
1.12	1.47335	0.994872	1.12	1.23668	1.22668
1.14	1.64768	1.20686	1.14	1.3769	1.17048
1.16	1.7394	1.02493	1.16	1.16551	1.01199
1.18	1.81801	0.884337	1.18	1.16499	0.975449
1.2	1.81424	1.15745	1.2	1.15607	1.11603
1.22	1.78717	1.27918	1.22	1.2454	1.34728
1.24	1.78497	1.05029	1.24	1.22567	1.52844
1.26	1.9089	1.05878	1.26	1.21974	0.865288
1.28	1.89415	0.907953	1.28	1.15501	1.18691
1.3	1.99735	1.11397	1.3	1.22874	1.28891
1.32	2.06474	0.963365	1.32	1.16879	1.04213
1.34	1.94092	1.1202	1.34	1.15928	0.970785
1.36	2.08445	1.00368	1.36	1.24169	0.711936
1.38	2.07165	0.960593	1.38	1.20686	1.20558
1.4	1.95524	1.17557	1.4	1.14501	1.21126
1.42	2.00445	1.1075	1.42	1.20629	1.09545
1.44	1.98117	1.099	1.44	1.23169	1.05071
1.46	1.88592	0.889746	1.46	1.22334	1.19694
1.48	2.03415	0.582204	1.48	1.19552	1.29873
1.5	1.91693	0.965274	1.5	1.1926	1.23022
1.52	1.98967	0.938181	1.52	1.16768	1.31124
1.54	2.07414	0.964533	1.54	1.27191	1.10544
1.56	2.07302	0.807328	1.56	1.26339	1.17227
1.58	1.97037	1.16263	1.58	1.15939	1.15195
1.6	2.11565	1.17903	1.6	1.28388	1.14848
1.62	2.1846	0.895592	1.62	1.30802	1.24029
1.64	2.35551	0.987211	1.64	1.38469	1.14014
1.66	2.46628	1.1243	1.66	1.40471	1.12113
1.68	2.30709	1.05295	1.68	1.35154	1.02289
1.7	2.26018	1.08662	1.7	1.27737	1.17014
1.72	2.16739	1.13282	1.72	1.33869	1.16945
1.74	2.31321	1.08375	1.74	1.34144	1.37394
1.76	2.25113	1.39335	1.76	1.26719	1.34812
1.78	2.39298	0.95557	1.78	1.24458	1.39015
1.8	2.22156	0.991692	1.8	1.3032	1.10321
1.82	2.08218	0.915741	1.82	1.30209	0.950663
1.84	1.91979	1.04802	1.84	1.30864	1.58459
1.86	2.04774	0.886367	1.86	1.27999	1.34671
1.88	1.79095	1.02331	1.88	1.28372	0.784899
1.9	2.1147	1.01601	1.9	1.32502	1.13231
1.92	2.18022	0.699669	1.92	1.26071	1.24674
1.94	2.17509	0.995685	1.94	1.28873	1.19822
1.96	2.08563	1.3732	1.96	1.38124	1.25648
1.98	2.10656	0.899126	1.98	1.28242	1.08211
2	2.05111	1.06112	2	1.29405	1.11979
2.02	1.84074	0.959435	2.02	1.2463	1.02188
2.04	1.8183	1.03449	2.04	1.30084	1.33522
2.06	1.9406	0.93507	2.06	1.2863	1.26022
2.08	2.20619	0.847302	2.08	1.22784	1.22534
2.1	2.11115	0.951133	2.1	1.24321	1.09899
2.12	2.02772	0.858176	2.12	1.23994	1.26122
2.14	1.93408	0.997223	2.14	1.33708	1.03416
2.16	2.01105	1.28607	2.16	1.31815	1.17737
2.18	2.1707	1.21383	2.18	1.35004	0.766627
2.2	1.90744	1.3438	2.2	1.31511	1.13195
2.22	2.23888	1.39688	2.22	1.29828	1.21607
2.24	2.37819	1.39415	2.24	1.32741	1.07068
2.26	2.23789	1.26336	2.26	1.30923	0.928976
2.28	2.28664	1.16484	2.28	1.33469	0.86972
2.3	2.42688	1.222	2.3	1.34062	0.693244
2.32	2.55336	1.26836	2.32	1.40297	1.04037
2.34	2.50479	1.24764	2.34	1.35748	1.20781
2.36	2.44394	1.37207	2.36	1.26983	0.759505
2.38	2.35976	1.24082	2.38	1.27653	0.774166
2.4	2.23406	1.3368	2.4	1.23533	1.28731
2.42	2.13708	1.1305	2.42	1.34267	1.18757
2.44	2.18819	1.40227	2.44	1.26287	1.19088
2.46	2.29494	1.29385	2.46	1.17323	1.12915
2.48	2.21823	1.43644	2.48	1.30166	0.983002
2.5	2.23556	1.22546	2.5	1.26364	1.2368
2.52	2.38569	1.33457	2.52	1.33991	1.33289
2.54	2.50074	1.39599	2.54	1.35559	1.2491
2.56	2.74833	1.47483	2.56	1.36681	1.15932
2.58	2.76514	1.20914	2.58	1.272	0.923909
2.6	2.839	1.55506	2.6	1.29868	1.12616
2.62	2.84846	1.36881	2.62	1.2293	1.18383
2.64	2.91572	1.54881	2.64	1.19078	1.08284
2.66	3.07011	1.40194	2.66	1.23442	1.2475
2.68	3.15144	1.40346	2.68	1.19721	1.11408
2.7	3.13428	1.23762	2.7	1.22167	1.15946
2.72	3.23364	1.55365	2.72	1.17086	1.19625
2.74	3.06565	1.20313	2.74	1.22484	1.24071
2.76	3.15447	1.49456	2.76	1.29135	1.1727
2.78	3.37894	1.27242	2.78	1.22509	0.998296
2.8	3.45688	1.52809	2.8	1.27225	1.01017
2.82	3.50549	1.18801	2.82	1.25149	1.28496
2.84	3.67043	1.25412	2.84	1.12745	0.904436
2.86	3.55347	1.27285	2.86	1.13744	1.26804
2.88	3.53815	1.24368	2.88	1.25697	1.26013
2.9	3.46904	1.24141	2.9	1.17289	1.29128
2.92	3.58474	1.09449	2.92	1.15374	0.901516
2.94	3.55251	1.19809	2.94	1.2222	0.973458
2.96	3.68123	1.23456	2.96	1.23167	1.04963
2.98	3.63688	1.44914	2.98	1.20308	1.26914
3	3.80043	1.04796	3	1.16275	1.17394
3.02	3.81344	1.24354	3.02	1.20247	1.05281
3.04	3.56993	1.50344	3.04	1.28237	1.25752
3.06	3.61343	1.35003	3.06	1.34386	1.33209
3.08	3.5153	1.43534	3.08	1.28015	1.037
3.1	3.33098	1.16138	3.1	1.28969	0.872242
3.12	3.22037	1.3885	3.12	1.37713	0.913684
3.14	3.34551	1.31324	3.14	1.38175	1.31384
3.16	3.26528	1.3805	3.16	1.31717	1.21065
3.18	3.24955	1.54577	3.18	1.36007	0.986518
3.2	3.16704	1.11863	3.2	1.26689	1.53283
3.22	3.01091	1.50844	3.22	1.38193	1.15128
3.24	2.72037	1.41132	3.24	1.35045	1.01696
3.26	2.78492	1.58131	3.26	1.33607	1.29939
3.28	2.84384	1.47515	3.28	1.47233	1.35564
3.3	2.71478	1.34177	3.3	1.35425	1.1497
3.32	2.68991	1.63446	3.32	1.29141	1.24108
3.34	2.66941	1.44249	3.34	1.29268	0.939757
3.36	2.68322	1.16816	3.36	1.34438	1.03989
3.38	2.62297	1.4778	3.38	1.34065	1.11899
3.4	2.47915	1.35212	3.4	1.36825	1.29827
3.42	2.85383	1.31261	3.42	1.33926	1.18311
3.44	2.6999	1.17175	3.44	1.33038	1.00082
3.46	2.66602	1.20572	3.46	1.24292	1.0985
3.48	2.64782	1.42638	3.48	1.25116	1.02522
3.5	2.45067	1.2495	3.5	1.34723	1.19805
3.52	2.27168	1.22651	3.52	1.25579	1.0476
3.54	2.30021	1.15013	3.54	1.21165	0.846326
3.56	2.26467	1.19926	3.56	1.21947	1.16169
3.58	2.53588	1.24113	3.58	1.23226	0.970251
3.6	2.45663	1.36536	3.6	1.19995	1.46306
3.62	2.60242	1.5997	3.62	1.23435	0.963879
3.64	2.42758	1.27303	3.64	1.25368	1.27402
3.66	2.31093	1.16987	3.66	1.27103	1.02064
3.68	2.22838	1.01874	3.68	1.26564	1.09555
3.7	2.0036	1.12645	3.7	1.18707	1.11928
3.72	2.00545	1.19764	3.72	1.2716	1.14857
3.74	2.00156	1.17678	3.74	1.28483	1.16979
3.76	1.90994	1.09037	3.76	1.31003	1.41931
3.78	2.08153	1.3916	3.78	1.32565	1.1028
3.8	2.00008	1.46963	3.8	1.3503	0.947663
3.82	1.79028	1.15982	3.82	1.27129	0.868015
3.84	1.89903	1.3852	3.84	1.30557	0.613702
3.86	1.81869	1.16243	3.86	1.3284	1.00902
3.88	1.85201	1.55875	3.88	1.31565	0.577824
3.9	2.12123	1.38389	3.9	1.37395	0.904593
3.92	2.24719	1.44244	3.92	1.3283	0.9972
3.94	2.28391	1.13673	3.94	1.27988	0.797077
3.96	2.29419	1.47652	3.96	1.30639	1.12368
3.98	2.48751	1.35253	3.98	1.35266	0.787978
4	2.52059	1.13976	4	1.30002	0.988633
4.02	2.4454	1.36266	4.02	1.24948	0.956349
4.04	2.51868	1.32516	4.04	1.31107	0.966313
4.06	2.69771	1.60077	4.06	1.25947	0.869969
4.08	2.7357	1.56382	4.08	1.29426	0.731186
4.1	2.55941	1.41001	4.1	1.18381	0.983367
4.12	2.63276	1.276	4.12	1.26614	1.2723
4.14	2.97319	1.64148	4.14	1.34011	0.998164
4.16	3.10016	1.16102	4.16	1.28103	1.15217
4.18	2.88439	1.60789	4.18	1.40571	0.800373
4.2	2.89492	1.15666	4.2	1.37255	1.01395
4.22	2.9479	1.19582	4.22	1.37762	1.25278
4.24	2.60149	1.46776	4.24	1.37629	0.768878
4.26	2.88614	1.36992	4.26	1.33931	0.980652
4.28	2.91134	1.06424	4.28	1.38796	1.02152
4.3	2.6539	1.08419	4.3	1.34711	0.783972
4.32	2.56544	1.23738	4.32	1.30307	0.968917
4.34	2.46604	1.39423	4.34	1.38339	1.15675
4.36	2.82429	1.32562	4.36	1.33104	0.989654
4.38	2.94558	1.32253	4.38	1.38615	1.27644
4.4	2.91063	1.40559	4.4	1.39767	1.20178
4.42	2.89409	1.40808	4.42	1.46253	0.573613
4.44	2.99853	1.35916	4.44	1.39759	0.779025
4.46	2.81457	1.41574	4.46	1.38007	1.11706
4.48	2.94947	1.42071	4.48	1.34488	0.967223
4.5	3.12036	1.24105	4.5	1.33116	1.1409
4.52	3.03731	1.40115	4.52	1.26639	1.44233
4.54	3.33625	1.49819	4.54	1.32908	1.08513
4.56	3.40045	1.37966	4.56	1.39417	0.952134
4.58	3.33612	1.04447	4.58	1.37087	1.09953
4.6	3.48035	1.33328	4.6	1.32588	1.06021
4.62	3.51847	1.42879	4.62	1.34559	1.09992
4.64	3.50716	1.40195	4.64	1.28136	1.15102
4.66	3.7206	1.17895	4.66	1.38017	1.45339
4.68	3.91915	1.28967	4.68	1.408	1.62776
4.7	3.6997	1.25264	4.7	1.31184	1.48134
4.72	3.60777	1.48339	4.72	1.28588	1.75359
4.74	3.78498	1.29869	4.74	1.30851	1.64519
4.76	3.84161	1.0983	4.76	1.29199	1.48495
4.78	3.76623	1.35549	4.78	1.24251	1.65146
4.8	3.7299	1.37102	4.8	1.20541	1.38443
4.82	3.89139	1.39429	4.82	1.20593	1.55605
4.84	3.888	1.31245	4.84	1.2427	1.58386
4.86	3.76333	1.44503	4.86	1.32774	1.54494
4.88	3.86645	1.47196	4.88	1.27317	1.69089
4.9	3.99738	1.3137	4.9	1.19086	1.43639
4.92	3.86964	1.30944	4.92	1.26563	1.6595
4.94	3.82934	1.24846	4.94	1.24181	1.36589
4.96	3.73036	1.34958	4.96	1.15983	1.61585
4.98	3.71255	1.36253	4.98	1.20169	1.64286
5	3.88662	1.33366	5	1.3261	1.70739
5.02	3.93146	1.4842	5.02	1.20732	1.54576
5.04	3.96622	1.22835	5.04	1.24444	1.6763
5.06	4.08322	1.29004	5.06	1.30394	1.73721
5.08	4.10477	1.17768	5.08	1.2669	1.53849
5.1	4.06145	1.45713	5.1	1.31419	1.64974
5.12	4.05295	1.38894	5.12	1.25951	1.68043
5.14	4.04555	1.37829	5.14	1.26851	1.58813
5.16	4.0612	1.23284	5.16	1.27961	1.59907
5.18	3.95125	1.36068	5.18	1.26091	1.58283
5.2	3.94731	1.26301	5.2	1.27282	1.30321
5.22	4.23422	1.16566	5.22	1.22232	1.49482
5.24	4.49034	1.29011	5.24	1.23344	1.32615
5.26	4.50954	1.34953	5.26	1.28856	1.70734
5.28	4.57724	1.5314	5.28	1.26985	1.68568
5.3	4.51684	1.2862	5.3	1.26371	1.71838
5.32	4.51287	1.37534	5.32	1.26655	1.68082
5.34	4.56669	1.28215	5.34	1.2885	1.67544
5.36	4.74288	1.35332	5.36	1.37123	1.52419
5.38	4.66776	1.4588	5.38	1.40511	1.59138
5.4	4.68985	1.47529	5.4	1.2349	1.40084
5.42	4.77491	1.4295	5.42	1.3123	1.59351
5.44	4.52556	1.18042	5.44	1.30853	1.66838
5.46	4.35522	1.1666	5.46	1.26548	1.60514
5.48	4.47272	1.23829	5.48	1.27098	1.38912
5.5	4.39568	1.19068	5.5	1.24294	1.41597
5.52	4.37525	1.58278	5.52	1.18508	1.62504
5.54	4.25072	1.4225	5.54	1.17061	1.61419
5.56	4.23172	1.55466	5.56	1.19993	1.56353
5.58	4.14955	1.27843	5.58	1.32371	1.68636
5.6	4.14256	1.34815	5.6	1.24403	1.63475
5.62	4.06615	1.42656	5.62	1.27703	1.4797
5.64	4.04819	1.37102	5.64	1.36969	1.68811
5.66	4.14095	1.45208	5.66	1.3253	1.60465
5.68	4.09716	1.16661	5.68	1.27843	1.48456
5.7	4.1511	1.52014	5.7	1.25136	1.42069
5.72	4.10778	1.34555	5.72	1.14722	1.60868
5.74	4.11204	1.3374	5.74	1.21644	1.34875
5.76	4.11736	1.5169	5.76	1.30759	1.33616
5.78	4.01082	1.59455	5.78	1.43033	1.35843
5.8	3.90356	1.43978	5.8	1.37117	1.14826
5.82	4.09069	1.23658	5.82	1.35208	1.26594
5.84	3.94975	1.54887	5.84	1.28754	1.49592
5.86	3.98723	1.34859	5.86	1.24647	1.1138
5.88	4.03844	1.31935	5.88	1.34034	1.13789
5.9	4.04947	1.53738	5.9	1.32437	0.998498
5.92	4.07969	1.19378	5.92	1.25333	1.12005
5.94	4.0693	1.1872	5.94	1.34222	1.27495
5.96	4.12589	1.21986	5.96	1.3848	1.3801
5.98	4.07184	1.09289	5.98	1.32291	1.27742
6	3.97696	0.965066	6	1.28825	1.30078
6.02	4.01165	1.26154	6.02	1.33165	0.977121
6.04	3.95759	1.35492	6.04	1.34762	0.99361
6.06	3.88113	1.26025	6.06	1.3526	1.30354
6.08	3.89595	1.52191	6.08	1.39311	1.24607
6.1	3.96345	1.24582	6.1	1.21476	1.31714
6.12	3.99327	0.883495	6.12	1.3131	0.978722
6.14	4.0557	0.686198	6.14	1.31733	1.26029
6.16	4.05214	0.943748	6.16	1.32015	1.31198
6.18	4.06815	1.01287	6.18	1.26575	1.26571
6.2	4.16673	1.05103	6.2	1.26283	1.00778
6.22	4.12038	0.953234	6.22	1.29982	1.18769
6.24	4.13245	0.921418	6.24	1.32245	1.00827
6.26	4.02361	1.06861	6.26	1.38885	1.2124
6.28	4.0837	0.989717	6.28	1.36019	1.21505
6.3	4.0395	1.01359	6.3	1.39026	1.13817
6.32	3.9701	0.848139	6.32	1.2315	1.31755
6.34	4.00025	0.992686	6.34	1.26771	1.23489
6.36	4.02656	1.11064	6.36	1.33405	1.23121
6.38	4.06928	0.834256	6.38	1.40946	1.31485
6.4	4.17748	0.97928	6.4	1.38115	1.08504
6.42	4.07091	1.03586	6.42	1.27679	1.23081
6.44	4.17762	1.1068	6.44	1.43257	1.47212
6.46	4.10789	0.977913	6.46	1.36523	1.47543
6.48	4.03907	0.958663	6.48	1.26824	1.57764
6.5	4.00083	1.24056	6.5	1.27283	1.09255
6.52	3.95106	1.08004	6.52	1.29397	1.2239
6.54	3.91742	1.09465	6.54	1.34013	1.39167
6.56	3.96819	0.927941	6.56	1.34897	1.40214
6.58	3.981	0.975042	6.58	1.27099	1.15992
6.6	3.8912	0.773244	6.6	1.3268	1.41406
6.62	3.92619	1.18659	6.62	1.21223	1.36034
6.64	3.96923	0.927899	6.64	1.22974	1.22502
6.66	3.91309	1.16134	6.66	1.33371	1.2583
6.68	3.94821	1.0112	6.68	1.38869	1.36913
6.7	3.96717	0.893978	6.7	1.24691	1.51639
6.72	3.9786	0.992293	6.72	1.19491	1.41124
6.74	3.92753	1.01216	6.74	1.33498	1.33436
6.76	3.95558	0.943548	6.76	1.3323	0.960399
6.78	4.02884	0.936797	6.78	1.38436	1.38889
6.8	4.03943	1.06086	6.8	1.30718	0.98521
6.82	3.91987	0.941536	6.82	1.33303	1.29545
6.84	3.81566	0.729965	6.84	1.36807	1.07677
6.86	3.93103	0.990781	6.86	1.35758	1.11113
6.88	3.83046	0.851686	6.88	1.36329	1.0899
6.9	3.92937	0.816746	6.9	1.27703	1.19932
6.92	3.88594	0.893832	6.92	1.40101	1.12197
6.94	3.86604	0.974565	6.94	1.35795	1.09983
6.96	3.9243	0.75282	6.96	1.4334	0.957664
6.98	3.99862	1.08847	6.98	1.44009	1.40347
7	3.89957	0.954585	7	1.33829	1.35426
7.02	3.87829	1.1852	7.02	1.35218	1.45053
7.04	3.93183	0.950389	7.04	1.34953	1.36314
7.06	3.92539	1.24843	7.06	1.38012	1.38053
7.08	4.0217	1.23564	7.08	1.44772	1.00477
7.1	4.02644	0.924726	7.1	1.3736	1.25225
7.12	4.02266	0.976415	7.12	1.32922	1.44135
7.14	4.02273	0.824107	7.14	1.4885	1.2547
7.16	4.0681	0.837408	7.16	1.4985	1.00668
7.18	3.93437	1.00833	7.18	1.41448	1.36156
7.2	3.88685	0.987648	7.2	1.44019	1.28318
7.22	3.99667	0.949363	7.22	1.43637	1.19426
7.24	3.98757	0.855412	7.24	1.43061	1.16566
7.26	3.87158	0.983756	7.26	1.39812	1.22895
7.28	3.94658	1.04843	7.28	1.27238	1.3165
7.3	3.94826	0.831161	7.3	1.44919	1.17739
7.32	3.98507	1.16353	7.32	1.38206	0.942381
7.34	3.94674	0.861419	7.34	1.31188	1.09351
7.36	3.96922	1.23143	7.36	1.40456	1.32921
7.38	3.99004	0.940289	7.38	1.39019	1.42408
7.4	4.0329	0.561396	7.4	1.37268	1.45219
7.42	4.02148	0.91499	7.42	1.45612	1.47727
7.44	3.89087	1.06287	7.44	1.41869	1.36736
7.46	3.87311	1.10214	7.46	1.48653	1.3477
7.48	3.93139	0.822661	7.48	1.52923	1.12702
7.5	3.83341	0.956737	7.5	1.40635	1.29838
7.52	3.92431	1.20109	7.52	1.50165	1.19086
7.54	3.99461	1.08435	7.54	1.4596	1.10316
7.56	3.86731	0.95707	7.56	1.46966	1.13259
7.58	3.82569	0.940463	7.58	1.39629	0.992867
7.6	3.8888	1.13457	7.6	1.38803	1.26237
7.62	3.77438	1.16475	7.62	1.37096	1.34552
7.64	3.90982	0.918855	7.64	1.32063	1.45679
7.66	3.95208	1.18259	7.66	1.39188	1.19883
7.68	3.98804	0.831907	7.68	1.34069	1.34127
7.7	3.90767	0.897995	7.7	1.41369	1.17736
7.72	3.96715	1.00346	7.72	1.3852	1.13642
7.74	4.04848	1.26577	7.74	1.3996	1.45395
7.76	4.02409	0.966434	7.76	1.33806	1.27604
7.78	3.98192	0.746701	7.78	1.36324	1.3649
7.8	3.8709	0.825731	7.8	1.30857	1.44562
7.82	3.9587	1.11987	7.82	1.29002	1.35706
7.84	3.96169	0.864691	7.84	1.37588	1.45865
7.86	3.8767	1.02375	7.86	1.30429	1.32021
7.88	3.89093	1.05062	7.88	1.32064	1.28107
7.9	3.8609	0.686669	7.9	1.33187	1.2524
7.92	3.93955	0.83037	7.92	1.33582	1.5215
7.94	3.97809	1.01054	7.94	1.3912	1.35765
7.96	3.91546	0.915106	7.96	1.24478	1.29757
7.98	3.9008	0.712847	7.98	1.31161	1.28726
8	3.93101	0.948898	8	1.29859	1.32043
8.02	3.95935	1.09454	8.02	1.32009	1.33775
8.04	3.9683	1.09052	8.04	1.40026	1.40582
8.06	3.93402	1.05178	8.06	1.28123	1.33953
8.08	3.92302	0.989561	8.08	1.37137	1.33311
8.1	3.97253	0.933149	8.1	1.29311	1.25903
8.12	3.99077	0.483954	8.12	1.31974	1.36659
8.14	3.99141	0.686284	8.14	1.32329	1.30557
8.16	4.01833	1.06469	8.16	1.32775	1.21756
8.18	4.06719	1.09776	8.18	1.30351	1.10189
8.2	4.07059	0.765023	8.2	1.32949	1.37776
8.22	3.95623	1.07448	8.22	1.30515	1.37714
8.24	3.92667	0.936015	8.24	1.20917	1.076
8.26	4.01927	1.06644	8.26	1.30245	1.34929
8.28	3.98569	1.09343	8.28	1.40996	1.28058
8.3	4.11184	1.16052	8.3	1.51675	1.06028
8.32	4.08442	1.22966	8.32	1.35169	1.32976
8.34	3.91701	0.625365	8.34	1.41086	1.14467
8.36	3.90841	0.975686	8.36	1.36563	1.38257
8.38	4.06481	0.997659	8.38	1.37116	1.08927
8.4	4.01397	0.690246	8.4	1.34511	1.33502
8.42	4.05767	0.742465	8.42	1.32002	1.26284
8.44	3.9465	1.1046	8.44	1.35793	1.32102
8.46	3.9963	0.908234	8.46	1.33044	1.19724
8.48	3.97358	0.754913	8.48	1.4137	1.2566
8.5	3.96406	0.957612	8.5	1.32035	1.31764
8.52	3.95134	1.20799	8.52	1.28588	1.3991
8.54	3.84344	1.03496	8.54	1.29245	1.4494
8.56	3.86944	1.17185	8.56	1.28765	1.35198
8.58	3.91327	0.902253	8.58	1.24316	1.17313
8.6	3.86596	0.95242	8.6	1.36697	1.24948
8.62	3.84598	1.07947	8.62	1.40305	1.13227
8.64	3.77712	1.19112	8.64	1.37934	1.34461
8.66	3.81378	0.968282	8.66	1.34812	1.36298
8.68	3.912	0.884521	8.68	1.3998	1.23884
8.7	3.89103	0.721335	8.7	1.35392	1.18885
8.72	3.89689	1.1481	8.72	1.31369	1.1925
8.74	3.82528	0.869349	8.74	1.3448	1.3254
8.76	3.85677	0.749365	8.76	1.35145	1.30362
8.78	3.84947	0.744327	8.78	1.3629	1.38131
8.8	3.7759	0.726825	8.8	1.34226	1.43394
8.82	3.90887	1.00657	8.82	1.50047	1.21101
8.84	3.7792	1.04376	8.84	1.43001	1.36568
8.86	3.89683	1.18076	8.86	1.33307	1.32143
8.88	3.82386	1.0943	8.88	1.2655	1.15205
8.9	3.79522	1.18629	8.9	1.42845	1.30927
8.92	3.80309	0.736961	8.92	1.42636	1.10882
8.94	3.87412	1.04008	8.94	1.25055	1.05777
8.96	3.81034	0.919495	8.96	1.32094	1.59137
8.98	3.84467	0.880962	8.98	1.31651	1.04411
9	3.86092	1.11817	9	1.41036	1.20491
9.02	3.90073	0.908935	9.02	1.38823	1.41275
9.04	3.82906	0.988794	9.04	1.33685	1.39786
9.06	3.84606	1.04365	9.06	1.26223	1.09297
9.08	3.89074	1.02934	9.08	1.32937	1.21912
9.1	3.8661	0.741155	9.1	1.30198	0.95634
9.12	3.84647	0.980413	9.12	1.28392	1.4803
9.14	3.79818	1.08218	9.14	1.33211	1.37593
9.16	3.85917	0.710137	9.16	1.3198	1.41919
9.18	3.88041	1.12545	9.18	1.41908	1.36112
9.2	3.87346	0.925509	9.2	1.39943	1.2545
9.22	3.8568	1.10075	9.22	1.43267	1.30634
9.24	3.91705	0.975969	9.24	1.42206	1.25077
9.26	3.91087	1.14062	9.26	1.464	0.897988
9.28	3.83216	1.08173	9.28	1.50246	1.56171
9.3	3.83133	0.720706	9.3	1.44796	1.21305
9.32	4.03076	1.02461	9.32	1.533	1.0642
9.34	3.99434	1.29057	9.34	1.43595	1.26581
9.36	3.87331	0.721438	9.36	1.45526	1.01222
9.38	3.91536	1.00658	9.38	1.37791	1.19102
9.4	3.90063	0.977658	9.4	1.41747	1.24676
9.42	3.96706	0.743573	9.42	1.40013	1.44119
9.44	3.89589	1.02321	9.44	1.39	1.39043
9.46	3.9622	1.22387	9.46	1.46684	1.42631
9.48	3.88526	0.950193	9.48	1.5012	1.19828
9.5	3.89568	0.973104	9.5	1.5529	1.20611
9.52	3.83294	0.983412	9.52	1.48464	1.05516
9.54	3.85293	1.04737	9.54	1.52511	1.46961
9.56	3.82006	1.07905	9.56	1.53229	1.28271
9.58	3.85607	1.0083	9.58	1.49782	1.47528
9.6	3.88799	1.01914	9.6	1.50137	1.28543
9.62	3.96592	1.04282	9.62	1.49458	1.27457
9.64	3.92578	0.916083	9.64	1.42576	1.06024
9.66	3.94386	0.928428	9.66	1.50318	1.55493
9.68	3.85902	0.875479	9.68	1.54893	1.51996
9.7	3.80641	1.0509	9.7	1.4764	1.55867
9.72	3.87692	1.04393	9.72	1.4843	1.29387
9.74	3.88922	0.865056	9.74	1.40806	1.30914
9.76	3.84192	0.728595	9.76	1.33073	0.924197
9.78	3.80772	0.95241	9.78	1.345	1.25041
9.8	3.77852	1.06516	9.8	1.44977	1.36297
9.82	3.79596	0.83984	9.82	1.51058	1.44603
9.84	3.83402	0.965674	9.84	1.50443	1.44768
9.86	3.81275	0.953409	9.86	1.4689	1.27656
9.88	3.84496	0.976142	9.88	1.58478	1.15049
9.9	3.87694	0.721836	9.9	1.50015	1.28492
9.92	3.9601	1.00437	9.92	1.54836	1.503
9.94	3.88388	1.20541	9.94	1.60683	1.38337
9.96	3.90344	0.85766	9.96	1.61294	1.36044
9.98	3.92194	1.09713	9.98	1.55102	1.31926
10	3.93089	0.951693	10	1.50093	1.15716
10.02	4.09347	1.09669	10.02	1.50047	1.40437
10.04	3.96856	0.969375	10.04	1.64338	1.1026
10.06	3.93153	0.684603	10.06	1.65076	1.28759
10.08	3.98728	0.756597	10.08	1.47777	1.27231
10.1	3.92405	1.11733	10.1	1.5093	1.17644
10.12	3.93924	0.898054	10.12	1.55126	1.25551
10.14	4.01504	0.707674	10.14	1.54302	1.1429
10.16	3.9669	0.761875	10.16	1.5654	1.10274
10.18	3.89388	1.0228	10.18	1.59015	0.728287
10.2	3.94265	0.775133	10.2	1.50314	1.00172
10.22	3.99188	0.89316	10.22	1.49136	0.835399
10.24	3.99611	0.973743	10.24	1.60381	0.909085
10.26	3.94319	1.11682	10.26	1.59729	1.27118
10.28	3.87795	1.19494	10.28	1.45348	1.1366
10.3	3.91978	0.977994	10.3	1.48697	1.2884
10.32	3.96217	1.21593	10.32	1.65658	1.40503
10.34	3.87643	1.0039	10.34	1.47773	1.12923
10.36	3.87043	0.880617	10.36	1.47924	1.35969
10.38	3.87597	1.06594	10.38	1.65479	1.09877
10.4	3.86153	1.09209	10.4	1.47805	1.27536
10.42	3.85423	1.00377	10.42	1.48178	1.24603
10.44	3.89159	1.21467	10.44	1.5136	1.28136
10.46	3.92564	1.21935	10.46	1.45842	1.47958
10.48	3.87645	0.976998	10.48	1.49299	1.13542
10.5	3.99008	0.998821	10.5	1.3735	1.24318
10.52	4.00094	0.670881	10.52	1.53161	1.21759
10.54	3.97271	1.21855	10.54	1.62388	1.29201
10.56	3.9582	1.04376	10.56	1.64487	1.22557
10.58	3.99828	1.1783	10.58	1.52476	1.09947
10.6	3.9467	1.16741	10.6	1.4389	1.07395
10.62	3.91588	0.863751	10.62	1.49664	1.24644
10.64	3.9163	1.01871	10.64	1.47161	1.04502
10.66	3.94237	1.23844	10.66	1.52348	1.30146
10.68	3.98665	1.02414	10.68	1.50355	1.34122
10.7	4.00229	1.16693	10.7	1.53299	1.2521
10.72	3.97087	1.23108	10.72	1.54492	1.10851
10.74	4.01556	0.885251	10.74	1.54553	1.41356
10.76	3.94179	1.01777	10.76	1.49844	1.04261
10.78	4.01743	1.19157	10.78	1.48415	1.01957
10.8	3.97754	1.22754	10.8	1.44193	1.25553
10.82	3.96761	1.12817	10.82	1.4472	1.18237
10.84	3.87422	0.683241	10.84	1.47855	1.00084
10.86	3.96211	1.03979	10.86	1.4414	1.02486
10.88	3.9866	0.906254	10.88	1.5006	1.39588
10.9	4.06287	1.25466	10.9	1.51232	1.27414
10.92	4.05003	0.796762	10.92	1.52801	1.41942
10.94	4.03868	0.861815	10.94	1.5057	1.18625
10.96	3.99677	1.03048	10.96	1.43803	1.3198
10.98	4.03731	1.00845	10.98	1.41632	1.32939
11	3.97384	0.808099	11	1.50329	1.20303
11.02	3.7975	1.07524	11.02	1.61972	1.52864
11.04	3.81608	0.852097	11.04	1.54102	1.21891
11.06	3.91648	1.26918	11.06	1.5279	1.41524
11.08	3.89115	0.971783	11.08	1.6965	0.974392
11.1	3.88083	0.98179	11.1	1.55006	1.31454
11.12	3.89033	0.727959	11.12	1.58013	1.32119
11.14	3.93651	1.22896	11.14	1.52587	1.23818
11.16	3.87162	0.90614	11.16	1.53157	1.37682
11.18	3.89874	1.01915	11.18	1.54224	1.23835
11.2	3.76643	1.06603	11.2	1.56515	1.14015
11.22	3.75206	1.00773	11.22	1.64636	1.23058
11.24	3.80457	1.05129	11.24	1.58821	1.20157
11.26	3.83571	0.883653	11.26	1.52144	1.48329
11.28	3.88946	1.07257	11.28	1.46848	1.38182
11.3	3.92158	0.915888	11.3	1.51499	1.42075
11.32	3.90577	0.748468	11.32	1.4897	1.22836
11.34	3.79943	1.07463	11.34	1.52137	1.25627
11.36	3.84275	1.06617	11.36	1.64151	0.973351
11.38	3.82622	1.05036	11.38	1.52415	1.05622
11.4	3.84364	0.760353	11.4	1.56069	1.54753
11.42	3.84755	0.911346	11.42	1.61598	1.44621
11.44	3.87932	0.716124	11.44	1.66554	1.39594
11.46	3.83796	1.04769	11.46	1.58438	1.43867
11.48	3.95214	1.07465	11.48	1.56464	1.32975
11.5	3.87853	1.02709	11.5	1.6387	1.22037
11.52	3.82821	0.841971	11.52	1.6457	1.5227
11.54	3.81841	1.09545	11.54	1.59247	1.4765
11.56	3.81355	0.91516	11.56	1.59521	0.785339
11.58	3.94004	1.0528	11.58	1.66193	0.972826
11.6	3.89392	0.998894	11.6	1.72708	1.04521
11.62	3.95096	0.914964	11.62	1.65663	1.31326
11.64	3.85332	0.982423	11.64	1.61544	1.43987
11.66	3.81129	1.07268	11.66	1.67978	1.11636
11.68	3.8145	1.1398	11.68	1.5744	1.04719
11.7	3.85849	0.95392	11.7	1.54352	1.03946
11.72	3.81711	0.701004	11.72	1.60199	1.40346
11.74	3.8707	0.900439	11.74	1.63579	1.29695
11.76	3.81928	0.969987	11.76	1.70636	1.22459
11.78	3.87861	1.19325	11.78	1.53454	1.2712
11.8	3.82604	0.719134	11.8	1.61094	1.27181
11.82	3.84133	0.8171	11.82	1.73354	1.35117
11.84	3.81275	0.999139	11.84	1.69231	1.10721
11.86	3.78549	0.868366	11.86	1.6229	0.858324
11.88	3.79451	0.72514	11.88	1.59246	1.48975
11.9	3.76295	0.757596	11.9	1.54626	1.3799
11.92	3.73886	1.17061	11.92	1.65824	1.39143
11.94	3.74176	1.09321	11.94	1.68034	1.29762
11.96	3.6938	1.10232	11.96	1.6698	1.35838
11.98	3.77104	1.22502	11.98	1.61851	1.36874
12	3.86393	0.975595	12	1.60794	1.16984
12.02	3.87347	0.783617	12.02	1.66798	1.36714
12.04	3.78598	0.802021	12.04	1.62546	1.40775
12.06	3.86076	1.13213	12.06	1.66323	1.3768
12.08	3.76973	1.00978	12.08	1.67986	1.35027
12.1	3.76328	1.1445	12.1	1.66366	1.26445
12.12	3.7744	0.985547	12.12	1.78047	1.01628
12.14	3.84615	1.29119	12.14	1.66242	1.16343
12.16	3.80134	0.95726	12.16	1.72503	1.259
12.18	3.77129	0.972042	12.18	1.7106	1.42894
12.2	3.86767	1.08188	12.2	1.63588	1.19261
12.22	3.76161	1.2293	12.22	1.57044	1.23211
12.24	3.85884	0.969808	12.24	1.55438	1.29287
12.26	3.87194	0.858747	12.26	1.59177	1.40419
12.28	3.88919	0.964115	12.28	1.65175	1.43692
12.3	3.89378	1.17637	12.3	1.67352	1.26741
12.32	3.92371	0.81271	12.32	1.6021	1.46639
12.34	3.89411	0.738398	12.34	1.54662	1.35608
12.36	3.90501	1.00574	12.36	1.485	1.28018
12.38	3.86462	1.08831	12.38	1.48577	1.18456
12.4	3.795	0.802777	12.4	1.49288	1.47591
12.42	3.7887	0.958495	12.42	1.52122	1.27601
12.44	3.85987	1.03025	12.44	1.63203	1.25922
12.46	3.90905	1.2718	12.46	1.58778	1.44229
12.48	3.7323	0.917452	12.48	1.56422	1.02702
12.5	3.87069	0.69737	12.5	1.61928	1.48431
12.52	3.85579	0.882729	12.52	1.54651	1.41717
12.54	3.89814	0.750846	12.54	1.61926	1.39894
12.56	4.0681	1.00507	12.56	1.55233	1.63986
12.58	3.93899	0.903767	12.58	1.62392	1.38416
12.6	3.78936	1.07942	12.6	1.79198	1.26631
12.62	3.82851	1.23066	12.62	1.60773	1.33928
12.64	3.78897	0.958661	12.64	1.59814	0.892451
12.66	3.76791	0.87076	12.66	1.55959	1.47694
12.68	3.78497	0.902926	12.68	1.59581	1.27978
12.7	3.87526	1.09986	12.7	1.67676	1.11495
12.72	3.66035	1.18911	12.72	1.58937	1.26854
12.74	3.7079	1.03379	12.74	1.53723	1.25986
12.76	3.68774	1.01475	12.76	1.60893	1.50971
12.78	3.79705	1.16663	12.78	1.53126	0.990941
12.8	3.88086	1.14028	12.8	1.56936	1.53873
12.82	3.75906	0.938453	12.82	1.49311	1.48646
12.84	3.82866	1.15946	12.84	1.53032	1.00909
12.86	3.72162	1.10232	12.86	1.63426	1.42495
12.88	3.77478	0.954591	12.88	1.60254	1.30982
12.9	3.72648	0.76918	12.9	1.45342	1.41988
12.92	3.83978	0.911148	12.92	1.54802	1.21742
12.94	3.82442	0.935569	12.94	1.47633	1.45925
12.96	3.86109	0.823522	12.96	1.65015	1.26124
12.98	3.87059	1.01456	12.98	1.56625	1.44663
13	3.78583	0.715166	13	1.61945	1.1283
13.02	3.70581	0.822968	13.02	1.56915	1.21587
13.04	3.73402	1.00796	13.04	1.63592	0.997153
13.06	3.79439	1.059	13.06	1.53015	1.14775
13.08	3.81555	0.988333	13.08	1.59723	0.940576
13.1	3.83432	0.984561	13.1	1.50953	1.49559
13.12	3.86132	1.14478	13.12	1.54008	1.41557
13.14	3.85482	0.837007	13.14	1.4901	1.41236
13.16	3.75182	0.953424	13.16	1.55853	1.37764
13.18	3.82463	1.00108	13.18	1.60802	1.3047
13.2	3.89199	0.899493	13.2	1.75322	1.43115
13.22	3.85594	0.992062	13.22	1.60699	1.38718
13.24	3.91119	0.81185	13.24	1.67968	1.15307
13.26	3.90451	0.859842	13.26	1.55295	1.02064
13.28	3.82329	1.04574	13.28	1.61453	1.25893
13.3	3.94281	1.12519	13.3	1.63301	1.23684
13.32	3.94148	0.901661	13.32	1.57827	1.15343
13.34	3.98567	1.32811	13.34	1.56386	1.42551
13.36	3.97215	0.716817	13.36	1.65888	1.46766
13.38	4.01128	1.15974	13.38	1.60397	1.20433
13.4	3.8818	0.786655	13.4	1.71014	1.38313
13.42	3.90809	0.717667	13.42	1.62571	1.23582
13.44	3.98177	1.01827	13.44	1.53792	1.25699
13.46	3.9341	1.12271	13.46	1.65033	1.28084
13.48	3.97967	1.03219	13.48	1.69484	1.0828
13.5	3.8256	1.10743	13.5	1.57105	1.34704
13.52	3.83752	0.793263	13.52	1.53007	1.46693
13.54	3.76279	1.01282	13.54	1.52994	1.35223
13.56	3.69994	0.911704	13.56	1.65872	1.14411
13.58	3.90122	1.00866	13.58	1.59908	1.49642
13.6	3.87971	1.04403	13.6	1.60255	1.30403
13.62	3.9586	1.01503	13.62	1.6183	1.07757
13.64	3.86224	1.25631	13.64	1.57713	1.47267
13.66	3.80224	0.984782	13.66	1.58218	0.982244
13.68	3.89038	0.811911	13.68	1.59933	1.33025
13.7	3.82967	0.850262	13.7	1.62068	1.20262
13.72	3.79334	1.15071	13.72	1.59208	1.2225
13.74	3.86401	1.07401	13.74	1.62492	1.3161
13.76	3.89797	0.872699	13.76	1.56022	1.21586
13.78	3.84781	0.964888	13.78	1.52789	1.25639
13.8	3.84013	1.00048	13.8	1.57822	1.26718
13.82	3.84253	0.905349	13.82	1.60292	1.19028
13.84	3.83556	1.06354	13.84	1.56391	0.999448
13.86	3.86703	0.950076	13.86	1.48252	1.43965
13.88	3.91424	1.26903	13.88	1.52897	1.34673
13.9	3.83	1.12952	13.9	1.37438	1.4377
13.92	3.80263	0.932411	13.92	1.42775	1.1116
13.94	3.83992	1.02102	13.94	1.49571	1.32398
13.96	3.86702	0.977839	13.96	1.49961	1.38771
13.98	3.9155	1.10909	13.98	1.53387	1.43141
14	3.96584	1.01596	14	1.46556	1.4636
14.02	3.90927	1.2251	14.02	1.43784	1.34044
14.04	3.88814	1.08912	14.04	1.55526	1.31111
14.06	3.89056	1.01032	14.06	1.62077	1.14201
14.08	3.87616	1.08716	14.08	1.54562	1.27137
14.1	3.84043	1.04182	14.1	1.52634	1.30331
14.12	3.90337	1.13559	14.12	1.49322	1.49099
14.14	3.91378	0.932266	14.14	1.52507	1.23571
14.16	3.94887	0.669649	14.16	1.49119	1.17781
14.18	4.0475	1.10859	14.18	1.56477	1.14551
14.2	4.06517	0.980907	14.2	1.55659	1.26782
14.22	4.14618	1.08729	14.22	1.60605	1.24179
14.24	3.92608	1.13594	14.24	1.58881	1.44351
14.26	3.93118	0.877936	14.26	1.51905	1.38128
14.28	3.99627	0.987164	14.28	1.46855	1.07155
14.3	3.9208	0.879727	14.3	1.43618	1.40171
14.32	3.95825	0.819951	14.32	1.52328	1.28441
14.34	3.93565	1.04978	14.34	1.3856	1.42551
14.36	4.00946	1.18791	14.36	1.42007	1.40324
14.38	4.05231	1.03374	14.38	1.50459	1.17592
14.4	3.98483	1.22682	14.4	1.50357	1.43439
14.42	3.94719	1.05873	14.42	1.52673	1.12062
14.44	3.94388	1.07776	14.44	1.47825	1.24376
14.46	3.87299	1.02222	14.46	1.49029	1.25996
14.48	3.94248	1.1639	14.48	1.41678	1.15241
14.5	3.85219	0.922313	14.5	1.46293	1.2059
14.52	3.93606	1.1516	14.52	1.45058	1.20887
14.54	3.84075	0.580431	14.54	1.45705	1.135
14.56	3.86791	0.957845	14.56	1.45809	1.22882
14.58	3.85613	0.950562	14.58	1.45528	1.17394
14.6	3.95166	0.980045	14.6	1.37601	1.12089
14.62	3.92369	1.05695	14.62	1.46522	1.04618
14.64	3.90525	1.2286	14.64	1.41228	1.19894
14.66	3.86957	0.958682	14.66	1.45072	1.39989
14.68	3.76418	0.785827	14.68	1.42974	1.50359
14.7	3.88317	0.901468	14.7	1.45279	1.27863
14.72	3.80784	1.01701	14.72	1.38006	1.08095
14.74	3.85665	1.08534	14.74	1.36325	1.30791
14.76	3.87535	1.0115	14.76	1.33296	1.23784
14.78	3.75095	1.18495	14.78	1.38705	1.17858
14.8	3.80142	0.94427	14.8	1.29373	1.21641
14.82	3.79335	0.7981	14.82	1.33164	1.33802
14.84	3.73979	1.09344	14.84	1.35364	1.40583
14.86	3.72257	1.00126	14.86	1.47307	1.12564
14.88	3.79819	0.706569	14.88	1.39535	1.429
14.9	3.78917	1.1958	14.9	1.36565	1.41281
14.92	3.87411	0.996142	14.92	1.36704	1.50363
14.94	3.80264	0.958031	14.94	1.41437	1.29107
14.96	3.7981	1.00355	14.96	1.3774	1.15309
14.98	3.92169	0.871708	14.98	1.40805	0.769389
15	3.83274	0.934643	15	1.4039	1.34931
15.02	3.86597	1.16011	15.02	1.31288	1.23835
15.04	3.88982	1.18496	15.04	1.40436	1.36005
15.06	3.81824	1.15839	15.06	1.34998	1.45069
15.08	3.90126	0.989537	15.08	1.34532	1.16908
15.1	3.76365	1.02022	15.1	1.3586	1.13091
15.12	3.87589	1.18826	15.12	1.34699	1.46681
15.14	3.88602	1.17127	15.14	1.34831	1.3012
15.16	3.80977	0.852913	15.16	1.44059	1.33628
15.18	3.79912	0.702531	15.18	1.41219	1.30478
15.2	3.83899	0.585103	15.2	1.45385	1.1584
15.22	3.88645	0.937043	15.22	1.39728	1.16981
15.24	3.8432	1.16041	15.24	1.35567	1.37213
15.26	3.93794	1.0403	15.26	1.37825	1.28152
15.28	3.8708	0.904798	15.28	1.32061	1.16889
15.3	4.0057	1.09147	15.3	1.35622	1.31343
15.32	3.8114	1.04526	15.32	1.28213	1.36229
15.34	3.76545	1.0369	15.34	1.3621	1.35812
15.36	3.84889	1.07102	15.36	1.34108	1.42579
15.38	3.85681	0.989747	15.38	1.2442	1.40514
15.4	3.79381	0.777601	15.4	1.30765	1.39078
15.42	3.82538	1.13393	15.42	1.33292	1.07203
15.44	3.8603	1.09713	15.44	1.33689	1.27294
15.46	3.84421	1.19085	15.46	1.40083	1.27473
15.48	3.87444	1.20585	15.48	1.38112	1.104
15.5	3.80548	1.01733	15.5	1.39682	1.31703
15.52	3.85896	1.0396	15.52	1.4271	1.35186
15.54	3.90673	0.61243	15.54	1.33049	1.01677
15.56	3.80887	1.04235	15.56	1.40475	1.21495
15.58	3.89766	1.18236	15.58	1.41598	1.51582
15.6	3.8724	1.0869	15.6	1.44009	1.20613
15.62	3.7733	1.04055	15.62	1.41504	1.38047
15.64	3.86826	0.921243	15.64	1.41562	1.36384
15.66	3.8523	0.743522	15.66	1.4173	1.17435
15.68	3.79483	1.33952	15.68	1.38865	1.38633
15.7	3.84398	0.959238	15.7	1.41757	1.61447
15.72	3.89642	0.856585	15.72	1.41099	1.18445
15.74	3.918	0.782912	15.74	1.3696	0.922755
15.76	4.01849	0.967195	15.76	1.44105	1.26315
15.78	3.99737	1.11374	15.78	1.40309	1.49039
15.8	3.88305	0.788984	15.8	1.41392	1.15551
15.82	3.94281	0.928994	15.82	1.36827	0.886796
15.84	3.97433	0.599135	15.84	1.37856	1.20712
15.86	3.86497	1.17923	15.86	1.38417	1.22986
15.88	3.85786	0.922845	15.88	1.44771	1.46745
15.9	3.91943	1.23143	15.9	1.38226	1.56269
15.92	3.90262	0.711697	15.92	1.47995	1.53309
15.94	3.87111	1.18017	15.94	1.39449	1.29258
15.96	3.82567	0.763404	15.96	1.42024	1.4134
15.98	3.84143	0.998565	15.98	1.39243	1.49726
16	3.84661	0.922384	16	1.37988	1.2811
16.02	3.77934	1.17823	16.02	1.45184	1.3737
16.04	3.91628	0.865186	16.04	1.42996	1.33569
16.06	3.96809	0.967972	16.06	1.4189	1.18526
16.08	3.84245	0.945118	16.08	1.40108	1.49746
16.1	3.78254	1.04997	16.1	1.41667	1.19322
16.12	3.91432	0.987856	16.12	1.49844	1.1668
16.14	3.78899	1.17915	16.14	1.47913	1.50982
16.16	3.81453	1.11478	16.16	1.3549	1.39398
16.18	3.85298	0.90745	16.18	1.49665	1.29214
16.2	3.82561	1.22216	16.2	1.47556	1.36958
16.22	3.83931	1.24386	16.22	1.54832	1.55604
16.24	3.79832	1.2398	16.24	1.37628	1.19678
16.26	3.91061	1.08271	16.26	1.56559	1.29231
16.28	3.8837	1.17323	16.28	1.50312	1.24893
16.3	3.91517	1.21852	16.3	1.57764	1.37532
16.32	3.88162	1.02964	16.32	1.55672	1.352
16.34	3.85765	1.12282	16.34	1.52246	1.42771
16.36	3.80701	0.928757	16.36	1.45551	1.28303
16.38	3.83945	1.44008	16.38	1.52323	1.30343
16.4	3.87595	1.02241	16.4	1.386	0.989854
16.42	3.91733	1.18779	16.42	1.39243	1.35502
16.44	3.99287	0.847325	16.44	1.38159	1.14061
16.46	4.0232	1.07566	16.46	1.46573	1.11208
16.48	3.91735	0.96561	16.48	1.44247	1.21749
16.5	3.93796	0.851334	16.5	1.43163	1.45442
16.52	3.92787	1.11841	16.52	1.48179	1.28027
16.54	3.94155	1.22029	16.54	1.49352	1.1231
16.56	3.99025	1.00733	16.56	1.35022	1.292
16.58	3.9019	1.01336	16.58	1.43163	1.28034
16.6	3.9682	0.926559	16.6	1.44019	1.29405
16.62	3.77892	1.0388	16.62	1.47998	1.43869
16.64	3.79991	1.00666	16.64	1.4816	1.33389
16.66	3.79806	1.09981	16.66	1.44594	1.48112
16.68	3.81566	1.02328	16.68	1.49452	1.11047
16.7	3.81449	0.892717	16.7	1.50199	0.974874
16.72	3.93975	1.19419	16.72	1.53176	1.35845
16.74	3.90633	1.2227	16.74	1.48284	0.846004
16.76	3.86489	1.266	16.76	1.53092	1.35891
16.78	3.88129	1.18515	16.78	1.49184	1.40266
16.8	3.88621	0.962155	16.8	1.50894	1.2905
16.82	3.89977	0.807739	16.82	1.49846	1.40906
16.84	3.96016	0.985541	16.84	1.50288	1.50184
16.86	3.96717	0.585402	16.86	1.50127	1.37293
16.88	4.03265	0.664074	16.88	1.49603	1.17243
16.9	3.98744	1.15828	16.9	1.49301	1.22884
16.92	3.92333	1.09088	16.92	1.47734	1.19888
16.94	3.90009	1.03505	16.94	1.43564	1.18654
16.96	3.9443	1.07236	16.96	1.39883	1.46721
16.98	4.07806	1.17733	16.98	1.43517	1.36086
17	4.05181	1.00956	17	1.45631	1.12669
17.02	3.89897	0.69855	17.02	1.33984	1.35812
17.04	3.9139	1.11198	17.04	1.40012	1.49556
17.06	3.95437	1.04066	17.06	1.47339	1.4222
17.08	4.05479	0.721401	17.08	1.43273	1.12925
17.1	3.92413	1.12386	17.1	1.39153	1.47726
17.12	3.95075	1.04057	17.12	1.39723	1.17066
17.14	4.06241	0.869935	17.14	1.43327	1.46908
17.16	3.95749	0.859617	17.16	1.39832	1.48397
17.18	3.94522	0.997512	17.18	1.37817	1.00685
17.2	4.00055	1.12753	17.2	1.36734	1.31051
17.22	3.91742	0.82399	17.22	1.38476	1.39757
17.24	3.92206	1.06911	17.24	1.51464	0.929484
17.26	3.98131	0.882697	17.26	1.46093	1.32303
17.28	3.95556	1.0878	17.28	1.44421	0.741648
17.3	3.96289	1.16606	17.3	1.42435	1.12321
17.32	3.9953	1.10391	17.32	1.40846	1.25341
17.34	4.11511	0.833001	17.34	1.43993	1.06782
17.36	4.03206	0.749245	17.36	1.44445	0.797837
17.38	4.01834	0.876403	17.38	1.48686	1.43926
17.4	3.96338	0.977045	17.4	1.46388	1.28474
17.42	3.92238	1.02846	17.42	1.4463	1.25319
17.44	4.05782	0.97576	17.44	1.47448	1.14127
17.46	3.98503	1.32092	17.46	1.52846	1.14935
17.48	3.99036	1.21107	17.48	1.51172	1.17317
17.5	3.99577	1.04165	17.5	1.47103	1.19257
17.52	4.03658	1.1546	17.52	1.50149	0.891589
17.54	3.89264	1.06365	17.54	1.60725	1.00198
17.56	4.05096	1.06141	17.56	1.4941	1.01978
17.58	4.0372	0.780879	17.58	1.49288	1.25348
17.6	4.01721	1.04435	17.6	1.43768	1.20855
17.62	4.05179	0.913324	17.62	1.53605	1.21375
17.64	3.96636	1.03765	17.64	1.57427	1.26022
17.66	3.9326	1.14753	17.66	1.45475	0.869554
17.68	4.01171	0.96132	17.68	1.4561	1.40214
17.7	4.07254	0.987295	17.7	1.60086	1.33929
17.72	3.99232	0.960794	17.72	1.61905	1.03834
17.74	3.98413	1.21443	17.74	1.4723	0.798726
17.76	3.893	1.00014	17.76	1.56417	1.40581
17.78	3.89757	0.837837	17.78	1.51502	1.1084
17.8	4.00926	1.10943	17.8	1.53596	1.11476
17.82	3.98459	1.11202	17.82	1.5823	1.34139
17.84	4.00884	0.98486	17.84	1.49593	1.1865
17.86	3.97171	0.967035	17.86	1.48854	1.16589
17.88	3.95721	1.03839	17.88	1.59546	1.21128
17.9	3.92851	0.880945	17.9	1.56085	1.12414
17.92	3.92002	0.914061	17.92	1.55268	1.11525
17.94	3.91781	1.0383	17.94	1.46535	1.20431
17.96	3.91535	0.915963	17.96	1.62817	0.943696
17.98	3.91416	1.19942	17.98	1.45844	0.944279
18	3.92374	1.15655	18	1.49549	1.34183
18.02	3.79221	1.07573	18.02	1.49252	1.39453
18.04	3.80678	1.18704	18.04	1.54987	1.27621
18.06	3.79838	1.10317	18.06	1.52476	1.08207
18.08	3.97077	0.599744	18.08	1.62121	1.22332
18.1	3.83697	0.982603	18.1	1.61436	1.11649
18.12	3.79606	1.21702	18.12	1.56691	1.18135
18.14	3.88148	1.08602	18.14	1.70372	1.07398
18.16	3.86342	0.869385	18.16	1.62587	1.37301
18.18	3.8671	1.13129	18.18	1.60054	1.11325
18.2	3.81659	1.01647	18.2	1.49765	1.23333
18.22	3.88705	0.908754	18.22	1.50756	1.41583
18.24	3.75275	0.973652	18.24	1.61714	1.28255
18.26	3.94063	0.959997	18.26	1.69092	1.37452
18.28	3.81752	1.26064	18.28	1.74576	1.40458
18.3	3.81129	1.07039	18.3	1.62486	1.16099
18.32	3.88852	1.13227	18.32	1.63605	0.868944
18.34	3.78739	1.00341	18.34	1.61978	0.880457
18.36	3.97826	1.13142	18.36	1.62381	1.15989
18.38	3.99273	1.21695	18.38	1.6439	1.06282
18.4	3.96398	1.05662	18.4	1.5828	1.18176
18.42	3.95108	0.616169	18.42	1.72018	1.4546
18.44	3.92755	1.01955	18.44	1.71912	1.37172
18.46	3.92063	1.13392	18.46	1.6633	1.40729
18.48	3.89478	1.05635	18.48	1.76206	1.04574
18.5	3.82605	0.810161	18.5	1.69081	1.32235
18.52	3.80984	1.22103	18.52	1.5812	1.3034
18.54	3.98269	0.89924	18.54	1.55379	1.1553
18.56	3.88277	0.923588	18.56	1.65354	1.29282
18.58	4.004	1.02105	18.58	1.5775	1.21414
18.6	3.92936	1.17978	18.6	1.71883	0.920645
18.62	3.97312	0.945885	18.62	1.60822	1.2654
18.64	3.88685	0.654929	18.64	1.63361	1.27956
18.66	3.84912	1.10488	18.66	1.56835	1.33288
18.68	3.8523	1.01608	18.68	1.67375	1.14809
18.7	3.93054	1.00083	18.7	1.6641	1.27403
18.72	3.87468	0.837153	18.72	1.63537	1.08556
18.74	3.86988	0.866946	18.74	1.53977	0.879051
18.76	3.83378	0.582112	18.76	1.61374	1.36152
18.78	3.86339	0.742367	18.78	1.53009	0.979507
18.8	3.88193	0.955487	18.8	1.59383	1.30564
18.82	3.96816	1.17515	18.82	1.58885	1.17494
18.84	3.94652	0.74112	18.84	1.659	1.02869
18.86	4.01225	1.00767	18.86	1.60496	0.960915
18.88	4.0381	0.72256	18.88	1.61813	0.805459
18.9	3.87996	1.01016	18.9	1.5922	1.18312
18.92	3.95584	1.21176	18.92	1.63036	1.0094
18.94	3.95884	0.887875	18.94	1.65365	1.2156
18.96	3.88542	0.891941	18.96	1.70644	1.1117
18.98	3.95762	0.731968	18.98	1.64271	1.06653
19	3.85784	0.991987	19	1.59279	1.01274
19.02	3.91439	1.07285	19.02	1.65454	1.11176
19.04	3.83342	0.882716	19.04	1.64215	1.22386
19.06	3.92972	1.19847	19.06	1.56902	1.03624
19.08	3.92886	0.693698	19.08	1.55024	0.862532
19.1	3.9169	1.05808	19.1	1.64822	0.725758
19.12	4.05926	1.02651	19.12	1.7207	1.29489
19.14	3.95597	1.18972	19.14	1.61173	1.16967
19.16	3.92198	0.707268	19.16	1.64535	0.858254
19.18	3.98395	1.14899	19.18	1.65263	1.02432
19.2	3.99655	0.950539	19.2	1.57681	0.850126
19.22	3.98781	1.08555	19.22	1.55468	1.4009
19.24	3.98673	1.00934	19.24	1.57182	1.03798
19.26	3.96453	1.04383	19.26	1.59816	1.01009
19.28	3.99082	0.738446	19.28	1.59672	1.14913
19.3	3.82846	0.795515	19.3	1.56853	1.05652
19.32	3.90159	0.921885	19.32	1.57901	1.15052
19.34	3.96257	1.2335	19.34	1.60871	1.17013
19.36	3.83061	0.972841	19.36	1.67835	1.17379
19.38	3.85917	1.14522	19.38	1.52286	1.02762
19.4	3.85995	0.989659	19.4	1.60367	1.08403
19.42	3.87783	1.12059	19.42	1.53342	1.15128
19.44	3.84354	1.12061	19.44	1.66822	0.968701
19.46	3.93617	1.18191	19.46	1.62421	0.903087
19.48	3.90159	0.935671	19.48	1.60741	0.963612
19.5	3.87913	1.03432	19.5	1.66824	1.10293
19.52	3.87745	0.966975	19.52	1.71613	1.05656
19.54	3.94936	1.14553	19.54	1.66052	1.20131
19.56	3.90076	1.06918	19.56	1.59957	0.953744
19.58	3.9401	0.888815	19.58	1.59744	1.273
19.6	3.86591	0.910187	19.6	1.65273	1.008
19.62	3.99143	1.00788	19.62	1.72108	1.23415
19.64	3.97785	1.18808	19.64	1.5838	1.1597
19.66	3.96955	0.976805	19.66	1.64704	1.04321
19.68	4.02715	1.16305	19.68	1.67236	1.40917
19.7	4.03651	0.924668	19.7	1.54367	1.01416
19.72	3.96586	0.959332	19.72	1.61467	1.07837
19.74	3.91818	1.16888	19.74	1.53184	1.044
19.76	4.04353	0.932624	19.76	1.56878	1.01392
19.78	3.97187	1.11366	19.78	1.48807	1.22351
19.8	3.96671	1.12474	19.8	1.56022	1.40071
19.82	3.97577	0.828199	19.82	1.61377	1.35009
19.84	3.91441	1.06932	19.84	1.54008	0.7977
19.86	3.86778	0.897865	19.86	1.59743	1.06507
19.88	3.9039	1.24376	19.88	1.47754	1.1286
19.9	3.93725	1.33851	19.9	1.50218	1.15792
19.92	3.94046	1.03561	19.92	1.58582	0.980989
19.94	3.87816	1.0018	19.94	1.55452	0.97804
19.96	3.94797	0.671429	19.96	1.67874	1.16916
19.98	3.9882	1.02334	19.98	1.54019	1.25189
20	3.85672	1.00179	20	1.5093	1.25671
20.02	3.88831	0.894659	20.02	1.57075	1.28218
20.04	3.94513	0.969508	20.04	1.45191	1.18358
20.06	4.02586	1.27975	20.06	1.42563	1.07975
20.08	3.92865	0.998838	20.08	1.60894	1.22651
20.1	3.88285	1.05685	20.1	1.60996	1.1193
20.12	3.97441	1.16202	20.12	1.6329	1.17144
20.14	3.89843	0.950316	20.14	1.51039	1.12771
20.16	3.95619	0.921121	20.16	1.60028	1.01135
20.18	3.85786	1.14554	20.18	1.54884	1.25126
20.2	3.937	0.76258	20.2	1.56092	1.14108
20.22	4.00151	1.04923	20.22	1.64962	0.905831
20.24	3.76746	1.1441	20.24	1.6358	1.0692
20.26	3.78174	1.03974	20.26	1.67273	1.16714
20.28	3.95419	0.844487	20.28	1.59097	1.17571
20.3	3.92537	0.939536	20.3	1.65611	1.24777
20.32	3.86892	0.714135	20.32	1.70041	1.28545
20.34	3.86552	0.935128	20.34	1.78277	1.36334
20.36	3.90741	1.09128	20.36	1.71549	1.15262
20.38	4.0138	1.03414	20.38	1.62874	1.27695
20.4	3.94787	1.1933	20.4	1.62951	1.2076
20.42	4.03839	1.04082	20.42	1.55066	1.45837
20.44	3.9123	1.16398	20.44	1.72279	1.16992
20.46	3.9954	1.0313	20.46	1.74313	1.12786
20.48	4.01583	0.940973	20.48	1.75442	1.05751
20.5	4.04847	1.26024	20.5	1.70548	1.10813
20.52	4.04551	1.29879	20.52	1.71485	1.46708
20.54	4.0154	1.09352	20.54	1.72764	1.08999
20.56	4.02943	0.713562	20.56	1.71749	1.20986
20.58	4.02601	1.23486	20.58	1.72421	1.23528
20.6	4.05937	1.03425	20.6	1.76101	1.25733
20.62	4.01555	0.931075	20.62	1.69366	1.31175
20.64	3.91958	0.758362	20.64	1.62537	1.2502
20.66	3.9621	1.02905	20.66	1.70699	1.29834
20.68	3.95581	1.10919	20.68	1.59879	1.37952
20.7	3.94838	1.15811	20.7	1.59064	1.38309
20.72	3.90065	0.942167	20.72	1.73072	1.23753
20.74	3.92531	1.06138	20.74	1.66036	1.17971
20.76	3.92339	0.853794	20.76	1.75571	1.31536
20.78	3.86805	0.972959	20.78	1.78885	1.29805
20.8	3.884	0.944694	20.8	1.75857	1.38248
20.82	3.85682	0.619003	20.82	1.73695	1.54674
20.84	3.9158	1.00893	20.84	1.6114	1.19382
20.86	3.94084	0.721932	20.86	1.77133	1.35173
20.88	3.89939	0.990941	20.88	1.77248	1.05337
20.9	3.85832	0.954924	20.9	1.71404	1.29041
20.92	3.88742	1.08119	20.92	1.70692	1.07848
20.94	3.78014	1.1438	20.94	1.71755	0.774815
20.96	3.93646	1.12783	20.96	1.70214	1.01679
20.98	3.8704	1.22492	20.98	1.79786	1.16022
21	3.85816	1.13214	21	1.71893	1.33487
21.02	3.81041	1.21069	21.02	1.82565	1.08331
21.04	3.96294	0.871564	21.04	1.74516	1.10831
21.06	4.0214	1.18138	21.06	1.78422	1.29674
21.08	4.00388	0.968018	21.08	1.75744	1.25877
21.1	4.0382	0.718903	21.1	1.82268	0.818834
21.12	3.94666	1.26344	21.12	1.78615	1.3532
21.14	3.90512	0.755274	21.14	1.82491	1.22903
21.16	3.98169	0.742639	21.16	1.8059	1.11795
21.18	3.84729	0.966923	21.18	1.68798	1.04944
21.2	3.80246	1.22979	21.2	1.6757	0.887568
21.22	3.76717	0.775768	21.22	1.69587	0.958025
21.24	3.84806	1.0466	21.24	1.83121	1.0208
21.26	3.8133	0.946729	21.26	1.76956	1.33425
21.28	3.80266	1.1025	21.28	1.78701	1.22985
21.3	3.98081	0.94676	21.3	1.70729	1.04136
21.32	3.922	0.941443	21.32	1.73799	1.2947
21.34	3.8695	0.972893	21.34	1.87022	1.03799
21.36	3.89535	1.00384	21.36	1.74353	1.23186
21.38	3.80136	0.912459	21.38	1.76614	1.12354
21.4	3.90482	0.921096	21.4	1.81148	1.24226
21.42	3.83117	0.929337	21.42	1.71638	1.26438
21.44	3.91861	1.14951	21.44	1.75344	1.14519
21.46	3.87467	0.96113	21.46	1.77712	1.15283
21.48	3.85363	0.730273	21.48	1.73343	1.00603
21.5	3.91342	1.27616	21.5	1.79335	1.03756
21.52	3.86143	0.962942	21.52	1.76424	1.11054
21.54	3.81034	1.14319	21.54	1.79204	0.988376
21.56	3.88709	0.890073	21.56	1.79528	1.13416
21.58	3.91845	1.17947	21.58	1.69827	1.03848
21.6	3.84729	1.22723	21.6	1.71674	0.877927
21.62	3.92293	1.11726	21.62	1.68302	1.10055
21.64	3.8483	0.917439	21.64	1.7487	1.20541
21.66	3.7529	1.19015	21.66	1.73415	1.05696
21.68	3.76093	0.951405	21.68	1.65406	1.20066
21.7	3.72522	1.09411	21.7	1.67707	0.934608
21.72	3.823	0.766739	21.72	1.80408	1.10887
21.74	3.76993	1.16042	21.74	1.85219	1.21921
21.76	3.82645	1.00634	21.76	1.72894	1.43815
21.78	3.95443	1.03008	21.78	1.73107	1.08944
21.8	4.04434	1.0984	21.8	1.83098	1.08015
21.82	3.86805	0.993339	21.82	1.70238	1.23415
21.84	3.94416	1.13301	21.84	1.70741	1.13335
21.86	3.93314	0.816703	21.86	1.67752	0.807068
21.88	3.96934	0.807855	21.88	1.68515	0.98835
21.9	4.01331	1.20639	21.9	1.77551	1.09291
21.92	3.89689	1.18541	21.92	1.66655	1.0209
21.94	3.98762	1.19504	21.94	1.66941	1.21984
21.96	3.95093	0.876756	21.96	1.66202	0.951472
21.98	4.06208	1.27165	21.98	1.71087	1.1972
22	4.01871	0.926974	22	1.77465	1.08828
22.02	3.97103	0.795375	22.02	1.7191	1.33513
22.04	3.88888	1.18142	22.04	1.81373	1.16076
22.06	3.91704	0.783298	22.06	1.67895	1.28628
22.08	3.97342	1.1784	22.08	1.70911	1.10407
22.1	4.02622	1.10273	22.1	1.67521	1.17693
22.12	3.9343	0.999075	22.12	1.7372	1.23627
22.14	3.9744	0.922528	22.14	1.77733	0.942465
22.16	3.8931	1.07231	22.16	1.75532	1.28467
22.18	4.03422	1.1026	22.18	1.73451	0.983278
22.2	3.90249	1.00655	22.2	1.77982	1.25939
22.22	4.04137	0.842955	22.22	1.79382	1.23572
22.24	3.96998	0.812437	22.24	1.77303	1.19032
22.26	3.89427	0.790411	22.26	1.86637	1.34564
22.28	3.90288	0.942611	22.28	1.84134	1.16343
22.3	3.90158	1.1931	22.3	1.80769	1.05402
22.32	3.92784	1.17689	22.32	1.78102	1.23518
22.34	4.00686	0.97634	22.34	1.70358	0.754581
22.36	3.923	0.949324	22.36	1.79475	1.21815
22.38	3.8807	0.896467	22.38	1.78431	0.807944
22.4	3.94785	1.22371	22.4	1.73215	1.39742
22.42	3.92442	0.954967	22.42	1.74021	1.44972
22.44	3.80753	1.03333	22.44	1.74508	1.28633
22.46	3.93629	0.749325	22.46	1.75357	1.21612
22.48	3.86585	1.00847	22.48	1.69811	1.2304
22.5	3.82944	1.00522	22.5	1.78166	0.883662
22.52	3.82885	1.10509	22.52	1.76052	1.12875
22.54	3.86752	1.09047	22.54	1.77802	1.33082
22.56	3.90534	1.0713	22.56	1.76143	1.32953
22.58	3.84894	1.26431	22.58	1.69805	1.04096
22.6	3.8808	1.31721	22.6	1.65995	1.23465
22.62	3.85537	0.966865	22.62	1.74065	1.31551
22.64	3.80405	0.779381	22.64	1.68944	1.15804
22.66	3.80691	1.13245	22.66	1.72648	0.984298
22.68	3.92265	1.01309	22.68	1.66096	0.890915
22.7	3.89252	1.00098	22.7	1.7389	1.09341
22.72	3.88797	0.998781	22.72	1.69714	1.15286
22.74	3.82128	0.997147	22.74	1.77822	1.32501
22.76	3.88434	1.19156	22.76	1.69924	1.28806
22.78	3.83799	1.18118	22.78	1.76929	1.29202
22.8	3.85789	0.722972	22.8	1.70956	1.0664
22.82	3.88781	0.812412	22.82	1.67548	1.2554
22.84	3.89009	1.00935	22.84	1.77537	1.04405
22.86	3.88416	0.738963	22.86	1.63962	1.02847
22.88	4.06496	1.20099	22.88	1.87019	1.0717
22.9	3.92588	0.881051	22.9	1.79986	1.12608
22.92	4.01359	1.02264	22.92	1.73326	1.20941
22.94	3.92643	1.0119	22.94	1.74502	0.705571
22.96	3.87665	1.043	22.96	1.82998	1.19352
22.98	3.94951	1.1734	22.98	1.7588	1.14438
23	4.00051	1.13123	23	1.66953	1.14725
23.02	3.88976	0.934955	23.02	1.7614	1.36231
23.04	3.99965	1.21187	23.04	1.77631	0.937488
23.06	3.99676	1.13116	23.06	1.72341	1.16946
23.08	3.99447	0.871404	23.08	1.7433	0.793566
23.1	3.91092	1.28466	23.1	1.80179	0.970928
23.12	3.92297	1.14589	23.12	1.80728	0.949213
23.14	3.91865	1.27417	23.14	1.9577	1.17539
23.16	3.95023	0.854299	23.16	1.8326	1.04572
23.18	3.90254	0.78532	23.18	1.80728	1.00986
23.2	3.92006	0.762016	23.2	1.84375	1.17373
23.22	3.81464	0.97673	23.22	1.75779	1.05133
23.24	3.99918	1.13352	23.24	1.80746	0.9837
23.26	3.92665	0.662356	23.26	1.83535	1.32481
23.28	3.97588	0.975347	23.28	1.76671	0.962827
23.3	3.96545	1.20545	23.3	1.8156	0.771293
23.32	3.91831	1.03914	23.32	1.74555	1.13178
23.34	3.96208	1.04839	23.34	1.70168	1.16858
23.36	3.84911	1.20711	23.36	1.64879	1.38781
23.38	4.04368	1.09652	23.38	1.74345	1.19544
23.4	3.93063	1.06721	23.4	1.76521	0.934012
23.42	3.90117	0.934048	23.42	1.77586	0.983623
23.44	3.94574	0.984128	23.44	1.72471	1.41518
23.46	3.9226	1.03846	23.46	1.8117	1.11796
23.48	3.90372	1.22818	23.48	1.73126	1.12539
23.5	3.91886	1.12784	23.5	1.59916	1.13501
23.52	3.97425	1.28889	23.52	1.71275	1.18995
23.54	4.01473	0.669199	23.54	1.71648	1.1512
23.56	3.91319	0.782215	23.56	1.73562	0.959105
23.58	3.93839	1.00234	23.58	1.62939	1.3254
23.6	3.96689	0.89455	23.6	1.73335	1.06548
23.62	3.94795	0.896647	23.62	1.84474	1.44279
23.64	3.96279	1.08453	23.64	1.80215	1.05033
23.66	4.03407	1.13556	23.66	1.8041	0.789304
23.68	4.00881	0.538794	23.68	1.82424	1.14581
23.7	3.89746	1.26526	23.7	1.78292	0.7983
23.72	3.87194	1.21246	23.72	1.78314	1.25426
23.74	3.86918	0.932702	23.74	1.77375	1.27509
23.76	3.93611	1.08989	23.76	1.70367	1.36219
23.78	3.93821	1.00691	23.78	1.68887	1.10967
23.8	3.92713	0.980422	23.8	1.7149	1.21218
23.82	3.84152	1.04159	23.82	1.5268	1.48564
23.84	3.86728	1.13213	23.84	1.7158	1.26868
23.86	3.9389	0.901227	23.86	1.72501	1.16795
23.88	3.8701	0.955614	23.88	1.60402	1.18124
23.9	3.99322	0.94236	23.9	1.70976	1.25347
23.92	3.94494	1.31572	23.92	1.727	1.31473
[truncated: 1,305 more rows]

## Sheet: budesonide
Time (ns)	protein_ARG1	LIG_Budesonide	Time (ns)	protein_ARG2	LIG_Budesonide
[truncated: 2,501 more rows]

[truncated: 1 more sheets: rolapitant]
