# Supplementary material for: Virtual Screening for FDA-Approved Drugs That Selectively Inhibit Arginase Type 1 and 2
Source: Molecules. 2022 Aug 12;27(16):5134. doi: 10.3390/molecules27165134 (PMC9416497; doi:10.3390/molecules27165134)
Supplement: Supplementary file 1 [file molecules-27-05134-s001.zip › Table S8.xlsx]

## Sheet: candesartan
Time (ns)	protein_ARG1	LIG_Candesartan	Time (ns)	protein_ARG2	LIG_Candesartan
0.02	0.918046	1.53156	0.02	0.595055	0.557095
0.04	1.18249	1.13835	0.04	0.66999	1.22589
0.06	1.25647	0.872613	0.06	0.690964	1.34994
0.08	1.39386	1.15082	0.08	0.79003	1.28753
0.1	1.4632	1.75511	0.1	0.752672	0.913454
0.12	1.50384	1.67679	0.12	0.867316	0.859015
0.14	1.3829	1.58235	0.14	0.860445	0.963195
0.16	1.28983	1.09248	0.16	0.809842	0.854647
0.18	1.71077	0.875256	0.18	0.884059	1.03019
0.2	1.7597	0.953914	0.2	0.914142	0.999024
0.22	1.69578	0.735939	0.22	0.79648	1.03811
0.24	1.62197	1.31744	0.24	0.78271	0.959284
0.26	1.78601	1.38373	0.26	0.898306	1.15812
0.28	1.82465	1.3154	0.28	0.829013	1.01566
0.3	2.01898	1.11879	0.3	0.813895	1.20408
0.32	2.12058	1.2635	0.32	0.832166	1.55837
0.34	1.76828	0.733721	0.34	0.866551	1.59012
0.36	1.65453	1.5923	0.36	0.88886	1.77066
0.38	1.67216	1.09313	0.38	0.914699	2.01302
0.4	1.89175	1.16577	0.4	0.893617	2.0347
0.42	1.71776	1.48203	0.42	1.02211	1.89524
0.44	1.67592	1.77581	0.44	0.943219	2.0179
0.46	1.76795	1.08893	0.46	0.945942	2.26846
0.48	1.76212	1.49157	0.48	0.960397	2.3075
0.5	2.07211	0.998884	0.5	1.01145	2.292
0.52	2.07635	1.47826	0.52	0.988792	2.23237
0.54	2.04216	1.5728	0.54	0.892465	2.27754
0.56	1.98358	1.05266	0.56	0.89448	2.1576
0.58	1.9285	0.99248	0.58	0.999688	2.14343
0.6	1.88163	1.76902	0.6	1.06888	2.64421
0.62	1.87391	1.03723	0.62	1.04364	2.77848
0.64	1.91773	1.2757	0.64	0.996208	2.43358
0.66	1.71299	1.02264	0.66	1.00791	2.33708
0.68	1.7103	1.18669	0.68	1.06269	2.3775
0.7	1.80145	1.22319	0.7	0.903175	2.26602
0.72	1.78424	1.06383	0.72	1.0137	2.13422
0.74	1.6514	1.25784	0.74	1.02694	2.32233
0.76	1.71442	1.35698	0.76	1.03946	2.19401
0.78	1.6711	1.04625	0.78	1.01447	1.96529
0.8	1.71211	0.937081	0.8	1.03923	2.18921
0.82	1.74406	0.659411	0.82	1.08682	2.47504
0.84	1.70539	0.734159	0.84	1.04889	2.18535
0.86	1.93565	0.750778	0.86	1.05683	2.509
0.88	1.92382	1.26173	0.88	1.0637	2.40532
0.9	1.74156	1.01063	0.9	1.13215	2.24415
0.92	1.72974	1.14747	0.92	0.985561	2.69859
0.94	1.79374	0.910684	0.94	0.97535	2.24233
0.96	1.84554	0.872021	0.96	1.05284	1.96195
0.98	2.06742	1.18499	0.98	0.984051	2.38213
1	2.13092	0.722961	1	0.962927	2.26308
1.02	1.96814	0.9463	1.02	0.968019	2.49247
1.04	2.00467	1.37798	1.04	1.01068	2.25123
1.06	1.87582	1.25554	1.06	0.941834	1.91827
1.08	1.8939	0.949774	1.08	0.965643	1.72807
1.1	1.82784	0.921238	1.1	1.09227	1.68647
1.12	1.97427	0.773935	1.12	1.05097	2.56495
1.14	2.00524	1.77462	1.14	1.0482	2.6133
1.16	2.18249	1.70415	1.16	1.00841	2.222
1.18	2.21312	2.03522	1.18	0.966787	2.1248
1.2	2.05797	2.50306	1.2	0.922948	2.4356
1.22	2.01714	2.89876	1.22	0.975213	2.44593
1.24	1.88622	2.9155	1.24	1.08914	2.13067
1.26	1.78109	2.95294	1.26	1.09193	2.2567
1.28	1.87969	2.78852	1.28	1.04098	2.35214
1.3	1.88872	2.81872	1.3	1.04021	2.14529
1.32	1.7601	2.80302	1.32	1.01208	2.29892
1.34	1.68678	2.56775	1.34	1.02951	2.14576
1.36	1.714	2.40047	1.36	1.03362	1.99343
1.38	1.67506	2.63264	1.38	1.00148	2.10911
1.4	1.63316	2.58358	1.4	0.990167	2.00708
1.42	1.72906	2.44505	1.42	1.05874	2.44434
1.44	1.67393	2.83676	1.44	1.04366	2.18119
1.46	1.62246	2.8371	1.46	1.02452	2.34756
1.48	1.75229	2.70525	1.48	0.996626	2.33022
1.5	1.8511	3.02278	1.5	0.994357	1.92336
1.52	1.64774	3.1718	1.52	1.06422	2.23052
1.54	1.56614	3.05699	1.54	0.994314	1.91022
1.56	1.63709	2.73624	1.56	1.05138	1.99339
1.58	1.56649	2.65009	1.58	1.04286	2.6215
1.6	1.5493	2.35246	1.6	0.998164	2.28202
1.62	1.53465	2.74	1.62	1.03933	2.06858
1.64	1.6121	2.59023	1.64	1.07852	2.07994
1.66	1.74117	2.684	1.66	1.08739	2.14659
1.68	1.71289	2.58687	1.68	1.11569	2.19243
1.7	1.77872	2.54024	1.7	1.06374	2.28908
1.72	1.68848	2.86064	1.72	1.1105	1.93374
1.74	1.69363	2.97999	1.74	1.02354	2.11063
1.76	1.60616	2.50516	1.76	0.995008	2.27896
1.78	1.59931	2.51512	1.78	1.03875	2.08072
1.8	1.47717	2.72893	1.8	1.06471	2.12114
1.82	1.51655	2.66093	1.82	1.05244	2.10757
1.84	1.57641	3.06893	1.84	1.00686	2.11743
1.86	1.57028	2.88832	1.86	1.07815	2.26311
1.88	1.63946	2.95399	1.88	1.02608	1.96522
1.9	1.60248	3.08521	1.9	1.07216	2.04946
1.92	1.57464	3.09475	1.92	1.04384	2.34994
1.94	1.54316	2.47996	1.94	1.03428	1.93526
1.96	1.67099	2.59015	1.96	1.01511	2.08254
1.98	1.67338	2.47001	1.98	1.04975	2.11447
2	1.73245	2.63111	2	1.05063	2.03354
2.02	1.71973	2.50126	2.02	1.08324	2.13143
2.04	1.77263	2.74036	2.04	0.963486	2.06783
2.06	1.71717	2.9465	2.06	1.00919	2.13763
2.08	1.76631	2.49367	2.08	0.952468	2.09703
2.1	1.82035	3.01431	2.1	1.0415	2.38572
2.12	1.73808	3.06023	2.12	0.982816	2.51696
2.14	1.79379	2.95826	2.14	1.01176	2.01998
2.16	1.86055	3.00218	2.16	0.993719	2.01642
2.18	1.8067	3.02542	2.18	1.07226	1.91306
2.2	1.8075	2.94821	2.2	1.10694	1.97188
2.22	1.79032	3.09581	2.22	1.07239	2.12386
2.24	1.85144	3.10269	2.24	1.07858	2.20286
2.26	1.90225	2.67688	2.26	1.07457	2.11266
2.28	1.9667	2.99194	2.28	1.05311	1.85378
2.3	1.94145	2.9361	2.3	1.06578	2.1051
2.32	1.98196	2.87001	2.32	1.0253	1.9919
2.34	2.00588	2.90339	2.34	0.96454	2.15133
2.36	2.1234	2.6793	2.36	0.98673	2.4094
2.38	2.20317	2.70692	2.38	1.10094	2.24724
2.4	2.2416	3.20889	2.4	1.09933	2.35724
2.42	2.17751	2.52879	2.42	1.17857	2.70149
2.44	2.09641	2.79171	2.44	1.16223	2.63274
2.46	2.10785	2.89982	2.46	1.20216	2.66494
2.48	2.01635	2.89262	2.48	1.19933	2.86575
2.5	2.02271	2.82458	2.5	1.1972	2.37978
2.52	1.95927	3.07725	2.52	1.30335	2.45951
2.54	1.92774	2.54138	2.54	1.24053	2.31726
2.56	1.79441	2.48376	2.56	1.21263	2.31937
2.58	1.71171	2.66667	2.58	1.21987	2.59088
2.6	1.78788	2.37198	2.6	1.19403	2.53095
2.62	1.6543	2.64926	2.62	1.16091	2.54541
2.64	1.70178	2.77055	2.64	1.12046	2.54753
2.66	1.7559	2.32679	2.66	1.20956	2.38392
2.68	1.79096	2.85277	2.68	1.14271	2.09214
2.7	1.63962	3.00908	2.7	1.28259	2.36294
2.72	1.63731	3.02402	2.72	1.22037	2.23852
2.74	1.73573	3.25701	2.74	1.19841	1.94501
2.76	1.75407	3.42558	2.76	1.32703	2.15424
2.78	1.8584	3.33222	2.78	1.31861	2.06934
2.8	1.82	3.02004	2.8	1.2044	2.11739
2.82	1.82669	2.83519	2.82	1.21932	2.45417
2.84	1.72534	3.10995	2.84	1.20296	2.55854
2.86	1.58924	2.6126	2.86	1.29716	2.49071
2.88	1.61931	2.62751	2.88	1.16244	2.0439
2.9	1.73907	2.58717	2.9	1.25937	2.301
2.92	1.77614	2.8473	2.92	1.14685	2.24998
2.94	1.75684	2.81489	2.94	1.2625	2.25383
2.96	1.72002	2.91759	2.96	1.26019	2.29092
2.98	1.66715	2.72755	2.98	1.24607	2.30064
3	1.74311	2.88809	3	1.19062	2.45452
3.02	1.58756	3.21696	3.02	1.25223	2.21075
3.04	1.68446	2.86661	3.04	1.31757	2.00079
3.06	1.64669	2.87044	3.06	1.19016	1.96945
3.08	1.65233	2.73015	3.08	1.27895	1.70618
3.1	1.69473	2.54793	3.1	1.23278	2.07702
3.12	1.63737	2.59432	3.12	1.14709	2.25349
3.14	1.62323	2.48841	3.14	1.23774	2.36858
3.16	1.6334	2.7042	3.16	1.24513	1.78451
3.18	1.57361	2.53569	3.18	1.25684	1.94231
3.2	1.69088	2.5187	3.2	1.20388	2.24432
3.22	1.57829	3.03479	3.22	1.25282	2.31662
3.24	1.69087	2.67871	3.24	1.25294	2.64892
3.26	1.65598	2.62822	3.26	1.22529	2.71303
3.28	1.56765	2.41969	3.28	1.22308	2.5297
3.3	1.64312	2.43272	3.3	1.11872	2.53587
3.32	1.64785	3.0234	3.32	1.2423	2.33693
3.34	1.62849	2.69057	3.34	1.26577	2.21689
3.36	1.6459	3.07978	3.36	1.15805	2.31878
3.38	1.7113	2.82911	3.38	1.2823	2.32539
3.4	1.74528	2.50539	3.4	1.14205	2.52336
3.42	1.81417	2.99781	3.42	1.21571	2.42735
3.44	1.95298	3.61639	3.44	1.26634	2.74579
3.46	1.99003	3.65416	3.46	1.16675	2.63069
3.48	1.83514	3.08413	3.48	1.27202	2.71847
3.5	1.81308	3.12434	3.5	1.32316	2.84374
3.52	1.86576	3.38499	3.52	1.45757	2.91207
3.54	1.96808	3.05227	3.54	1.32515	2.97747
3.56	1.99791	3.52051	3.56	1.26295	2.71096
3.58	1.99871	3.86954	3.58	1.26033	2.77323
3.6	1.96936	3.96393	3.6	1.33697	2.83517
3.62	2.03665	3.99482	3.62	1.29085	2.71017
3.64	2.06249	3.9773	3.64	1.42694	2.86852
3.66	2.06306	3.84905	3.66	1.27302	2.86767
3.68	2.1611	3.95693	3.68	1.33924	2.62844
3.7	2.17968	3.84588	3.7	1.35743	2.71174
3.72	2.22345	4.06654	3.72	1.28551	2.98587
3.74	2.37948	3.84404	3.74	1.34377	2.88628
3.76	2.41126	4.121	3.76	1.40589	2.65176
3.78	2.39135	3.95162	3.78	1.39464	2.54502
3.8	2.18038	3.81998	3.8	1.28678	2.57873
3.82	2.18275	3.83022	3.82	1.30457	2.72031
3.84	2.33075	3.88392	3.84	1.38494	2.8474
3.86	2.42773	3.63082	3.86	1.48471	2.65174
3.88	2.57843	3.59157	3.88	1.29039	2.60856
3.9	2.51089	3.87047	3.9	1.3742	2.69903
3.92	2.32661	3.96402	3.92	1.35851	2.87905
3.94	2.23306	4.06194	3.94	1.35192	2.52592
3.96	2.35154	3.88921	3.96	1.29025	2.5892
3.98	2.49069	3.99193	3.98	1.35585	2.38252
4	2.60645	3.75838	4	1.33913	2.21186
4.02	2.58531	3.94867	4.02	1.44751	2.31783
4.04	2.6456	3.47664	4.04	1.37672	1.91079
4.06	2.7293	3.22864	4.06	1.36138	2.34307
4.08	2.67433	3.23668	4.08	1.40381	2.26853
4.1	2.63129	3.21064	4.1	1.37186	2.29575
4.12	2.52047	3.52554	4.12	1.36899	2.54433
4.14	2.45706	3.85072	4.14	1.41805	2.80283
4.16	2.55589	3.71794	4.16	1.33576	2.56443
4.18	2.53729	3.46747	4.18	1.34174	2.72033
4.2	2.56989	3.91886	4.2	1.41509	2.56828
4.22	2.65829	3.95516	4.22	1.39484	2.15979
4.24	2.65689	3.65345	4.24	1.38454	1.90841
4.26	2.71723	3.87668	4.26	1.3731	2.24399
4.28	2.68594	4.00195	4.28	1.38413	2.42719
4.3	2.61643	3.92519	4.3	1.405	2.35054
4.32	2.56846	3.91623	4.32	1.41546	2.373
4.34	2.49296	3.99535	4.34	1.46285	2.48221
4.36	2.43623	3.14527	4.36	1.31998	2.42443
4.38	2.43188	3.24201	4.38	1.39233	2.50271
4.4	2.4641	3.2119	4.4	1.38309	2.41429
4.42	2.51568	4.16255	4.42	1.36309	1.71361
4.44	2.59479	3.93883	4.44	1.37244	1.33973
4.46	2.45133	3.71936	4.46	1.34091	1.6605
4.48	2.39644	3.52279	4.48	1.31204	1.05744
4.5	2.47916	3.90251	4.5	1.39171	1.20102
4.52	2.50938	3.4705	4.52	1.40954	1.21274
4.54	2.5188	3.88676	4.54	1.40942	1.11538
4.56	2.75615	3.4206	4.56	1.40459	0.518829
4.58	3.01201	4.18954	4.58	1.34691	1.12886
4.6	2.96263	3.86364	4.6	1.36217	1.94881
4.62	2.9238	4.03756	4.62	1.38119	1.60213
4.64	2.70072	3.9371	4.64	1.39738	1.83349
4.66	2.7212	4.02909	4.66	1.40639	1.85952
4.68	2.69823	3.84193	4.68	1.50259	1.89454
4.7	2.81397	3.7689	4.7	1.37021	2.00738
4.72	2.67768	3.95785	4.72	1.35907	2.00985
4.74	2.66973	3.75222	4.74	1.31009	1.86885
4.76	2.66819	3.48701	4.76	1.4544	2.21791
4.78	2.60428	3.4019	4.78	1.43223	1.82938
4.8	2.5493	2.79845	4.8	1.30496	2.02653
4.82	2.56809	2.89192	4.82	1.41546	1.58276
4.84	2.50206	3.25215	4.84	1.33223	1.50827
4.86	2.49017	3.67605	4.86	1.3486	1.63046
4.88	2.67443	3.63191	4.88	1.4275	1.91667
4.9	2.86555	3.2256	4.9	1.4032	1.11981
4.92	2.74004	3.77155	4.92	1.3351	1.12201
4.94	2.80886	3.94981	4.94	1.38385	1.06639
4.96	2.75398	4.14869	4.96	1.36688	1.50478
4.98	2.68076	3.78538	4.98	1.31809	1.09067
5	2.58822	3.75605	5	1.33342	1.36805
5.02	2.51841	4.03621	5.02	1.26434	1.88412
5.04	2.63889	4.10851	5.04	1.37984	1.44704
5.06	2.48015	3.78505	5.06	1.29852	1.53616
5.08	2.57278	4.00742	5.08	1.40454	1.83907
5.1	2.69787	3.8118	5.1	1.35371	1.93655
5.12	2.63619	3.93782	5.12	1.3744	1.9895
5.14	2.60436	4.19298	5.14	1.26537	2.41313
5.16	2.61902	4.02153	5.16	1.36934	2.23808
5.18	2.53729	4.07717	5.18	1.36751	2.42002
5.2	2.54797	3.81413	5.2	1.4064	2.1215
5.22	2.56095	4.00393	5.22	1.4046	2.14259
5.24	2.51313	3.78822	5.24	1.36301	1.81305
5.26	2.75096	3.65027	5.26	1.40005	2.16394
5.28	2.64024	3.85988	5.28	1.37841	2.28972
5.3	2.70873	2.97925	5.3	1.34712	2.83649
5.32	2.73585	3.47476	5.32	1.43506	2.19385
5.34	2.65623	2.27073	5.34	1.37678	2.11454
5.36	2.58561	2.37299	5.36	1.2056	1.42186
5.38	2.69692	3.07124	5.38	1.34283	1.66787
5.4	2.71867	3.30207	5.4	1.32928	1.54996
5.42	2.8232	2.95168	5.42	1.39175	2.14133
5.44	2.65586	3.71256	5.44	1.34003	1.33115
5.46	2.7729	3.25194	5.46	1.38193	1.65837
5.48	2.70046	2.82984	5.48	1.34025	1.57661
5.5	2.71301	2.71199	5.5	1.30939	1.43218
5.52	2.63667	2.98695	5.52	1.36008	2.11825
5.54	2.55689	3.77374	5.54	1.44673	1.59509
5.56	2.77133	4.00127	5.56	1.44033	0.834521
5.58	2.73357	4.06751	5.58	1.48971	1.47061
5.6	2.65551	3.90387	5.6	1.39471	1.54385
5.62	2.72417	3.57949	5.62	1.50485	1.90222
5.64	2.63354	3.63049	5.64	1.49382	1.6787
5.66	2.75268	3.55895	5.66	1.46673	1.77146
5.68	2.78924	3.82296	5.68	1.48949	1.33629
5.7	2.87156	4.03727	5.7	1.51707	1.29778
5.72	2.67423	4.02545	5.72	1.61651	1.223
5.74	2.89452	3.77897	5.74	1.47213	1.10289
5.76	2.6965	3.94018	5.76	1.42947	1.60932
5.78	2.78603	3.96796	5.78	1.42086	1.33438
5.8	2.90898	3.57011	5.8	1.36802	1.40007
5.82	2.75585	3.3871	5.82	1.36387	1.24876
5.84	2.75186	3.40002	5.84	1.44569	1.77063
5.86	2.55632	3.94838	5.86	1.38218	1.69997
5.88	2.55452	3.9987	5.88	1.39687	1.75022
5.9	2.57727	3.4086	5.9	1.46747	1.74823
5.92	2.54776	3.26946	5.92	1.33809	2.19493
5.94	2.53827	3.65818	5.94	1.39134	2.11526
5.96	2.63346	2.9509	5.96	1.3835	2.30553
5.98	2.47669	2.36283	5.98	1.37003	1.96749
6	2.50831	2.68297	6	1.43998	2.41427
6.02	2.48047	2.77877	6.02	1.39026	2.2238
6.04	2.42196	2.59151	6.04	1.35287	2.4913
6.06	2.44375	3.0355	6.06	1.38701	1.87112
6.08	2.44968	2.54231	6.08	1.33059	2.17161
6.1	2.47007	2.49801	6.1	1.39655	2.1541
6.12	2.34217	3.67661	6.12	1.38875	2.34215
6.14	2.29516	3.15284	6.14	1.38536	2.13724
6.16	2.39643	2.39424	6.16	1.54786	2.63866
6.18	2.36877	2.23078	6.18	1.3823	2.46898
6.2	2.28419	2.58628	6.2	1.41996	2.71484
6.22	2.25646	2.36762	6.22	1.44508	1.82549
6.24	2.37165	2.30864	6.24	1.42425	2.16809
6.26	2.49515	2.23325	6.26	1.37818	1.98882
6.28	2.54941	2.3102	6.28	1.43374	1.51519
6.3	2.49181	3.19844	6.3	1.50877	1.22434
6.32	2.45694	2.31188	6.32	1.48996	1.14222
6.34	2.52765	2.5206	6.34	1.53307	1.47312
6.36	2.59386	2.33431	6.36	1.43313	1.54996
6.38	2.50311	3.07143	6.38	1.36791	2.27999
6.4	2.47939	3.55077	6.4	1.37999	1.93626
6.42	2.61038	3.10089	6.42	1.37619	1.64585
6.44	2.77962	3.89804	6.44	1.44502	1.59811
6.46	2.76348	3.98281	6.46	1.34479	2.08752
6.48	2.62056	3.60174	6.48	1.53008	2.58313
6.5	2.56248	3.28118	6.5	1.51137	2.45519
6.52	2.54523	3.84838	6.52	1.46004	2.4748
6.54	2.58074	2.91989	6.54	1.42274	2.28352
6.56	2.49518	2.70413	6.56	1.56162	2.08943
6.58	2.58619	2.81328	6.58	1.46074	2.0475
6.6	2.53209	3.43159	6.6	1.50535	2.31565
6.62	2.52077	3.52573	6.62	1.51025	2.60495
6.64	2.50323	3.58202	6.64	1.53666	3.00926
6.66	2.54283	4.15525	6.66	1.58524	2.95699
6.68	2.40252	4.1706	6.68	1.52621	3.2398
6.7	2.40688	3.90833	6.7	1.61112	2.9002
6.72	2.47752	3.86225	6.72	1.5812	2.96803
6.74	2.43647	4.14426	6.74	1.57481	2.64227
6.76	2.50754	3.88709	6.76	1.49359	2.63316
6.78	2.45738	3.62766	6.78	1.46267	2.24796
6.8	2.50188	4.12143	6.8	1.35359	1.77582
6.82	2.43716	3.94606	6.82	1.48287	1.7193
6.84	2.31427	3.45696	6.84	1.50314	1.72556
6.86	2.26091	3.64215	6.86	1.41453	1.72282
6.88	2.43144	2.4851	6.88	1.3922	2.20595
6.9	2.43243	2.22578	6.9	1.41926	1.77844
6.92	2.31139	3.09754	6.92	1.34247	1.6053
6.94	2.3861	2.94634	6.94	1.40072	1.59797
6.96	2.36875	2.61786	6.96	1.39041	1.97242
6.98	2.41786	3.67464	6.98	1.28123	2.4598
7	2.38621	2.92447	7	1.57894	2.80029
7.02	2.43909	3.64004	7.02	1.46604	2.21155
7.04	2.34662	3.52076	7.04	1.45431	2.46281
7.06	2.28307	3.77697	7.06	1.40168	2.22951
7.08	2.51331	2.94101	7.08	1.45915	1.77472
7.1	2.47058	3.13327	7.1	1.60225	1.61882
7.12	2.65819	3.28837	7.12	1.63622	1.53815
7.14	2.49999	3.28292	7.14	1.54966	1.67269
7.16	2.66959	3.08565	7.16	1.54702	1.91278
7.18	2.4059	3.61711	7.18	1.73022	1.82935
7.2	2.4674	3.78485	7.2	1.56085	2.43039
7.22	2.50148	3.9559	7.22	1.52005	2.37026
7.24	2.52306	3.89105	7.24	1.51866	1.6968
7.26	2.52453	4.01908	7.26	1.60363	2.19343
7.28	2.55156	4.03558	7.28	1.57122	1.86418
7.3	2.46683	3.90188	7.3	1.64355	1.92986
7.32	2.33381	3.97872	7.32	1.57938	2.72553
7.34	2.33969	3.93424	7.34	1.53977	2.20185
7.36	2.294	4.11891	7.36	1.47267	2.22799
7.38	2.26845	4.13804	7.38	1.44334	2.33286
7.4	2.09106	3.77187	7.4	1.54444	2.93698
7.42	2.179	3.50703	7.42	1.45969	3.17475
7.44	2.11624	3.5803	7.44	1.54918	2.9536
7.46	2.10902	3.70081	7.46	1.5224	2.86407
7.48	2.18079	3.43776	7.48	1.51097	2.4862
7.5	2.17195	3.84761	7.5	1.5113	2.49261
7.52	2.11618	3.8153	7.52	1.51918	2.91671
7.54	2.11464	3.75562	7.54	1.47358	2.98782
7.56	2.13344	3.85186	7.56	1.42915	3.04159
7.58	2.03106	3.701	7.58	1.44909	2.96611
7.6	2.01701	3.92183	7.6	1.47499	3.02338
7.62	1.98996	3.98472	7.62	1.51338	2.21606
7.64	2.09742	3.92155	7.64	1.5208	2.61487
7.66	2.1321	3.58613	7.66	1.46955	2.15709
7.68	2.1573	3.44924	7.68	1.45567	1.68344
7.7	2.17311	3.69211	7.7	1.48939	1.096
7.72	2.20979	3.61912	7.72	1.49911	1.34808
7.74	2.16283	3.57614	7.74	1.45574	1.66778
7.76	2.19756	3.60264	7.76	1.49932	1.31718
7.78	2.32168	3.50015	7.78	1.52339	1.4507
7.8	2.15993	3.81237	7.8	1.54511	1.62241
7.82	2.17635	3.74283	7.82	1.51005	1.74271
7.84	2.14089	3.8811	7.84	1.46879	2.3083
7.86	2.18946	3.91081	7.86	1.54147	1.68249
7.88	2.1655	3.94536	7.88	1.51558	2.27523
7.9	2.03829	3.92519	7.9	1.52897	2.55478
7.92	2.19326	3.73294	7.92	1.55534	2.89862
7.94	2.22653	3.96574	7.94	1.44337	2.4049
7.96	2.1597	3.73413	7.96	1.48616	2.39063
7.98	2.33523	3.96458	7.98	1.61052	2.19751
8	2.37304	3.66644	8	1.48072	2.5099
8.02	2.39424	3.62234	8.02	1.37779	2.51415
8.04	2.39881	3.82411	8.04	1.40042	2.66214
8.06	2.27916	3.94213	8.06	1.47326	3.06947
8.08	2.30172	4.07038	8.08	1.45402	2.76487
8.1	2.30814	3.86338	8.1	1.49321	2.18293
8.12	2.31669	4.20521	8.12	1.51976	2.02042
8.14	2.40998	4.02372	8.14	1.50038	2.49005
8.16	2.55718	4.07387	8.16	1.54162	2.68689
8.18	2.70221	3.76044	8.18	1.47675	2.75521
8.2	2.7416	3.15614	8.2	1.3674	3.08399
8.22	2.56539	3.54977	8.22	1.60683	3.06682
8.24	2.50401	4.05702	8.24	1.46269	2.30636
8.26	2.30872	3.73409	8.26	1.45931	2.17553
8.28	2.33056	4.01252	8.28	1.44929	2.01283
8.3	2.30237	4.01553	8.3	1.44611	1.54651
8.32	2.20004	3.90095	8.32	1.48464	1.95276
8.34	2.23145	4.06789	8.34	1.49365	1.8258
8.36	2.27338	4.05872	8.36	1.46703	1.70499
8.38	2.31403	4.00078	8.38	1.47265	1.61306
8.4	2.23794	3.63167	8.4	1.39229	1.74509
8.42	2.07621	3.65716	8.42	1.46997	2.28448
8.44	1.96909	3.99206	8.44	1.5248	1.71419
8.46	2.08501	3.99619	8.46	1.39954	2.02444
8.48	2.13115	4.09716	8.48	1.34551	2.34723
8.5	2.04207	3.83342	8.5	1.37356	2.43898
8.52	1.99409	4.02266	8.52	1.36351	1.80131
8.54	2.18018	4.00285	8.54	1.42744	2.09113
8.56	2.19968	4.00704	8.56	1.45493	2.38429
8.58	2.12345	3.99247	8.58	1.42731	1.96608
8.6	2.19423	4.1398	8.6	1.49418	2.56913
8.62	2.24139	3.91527	8.62	1.44008	2.24685
8.64	2.32024	4.01168	8.64	1.48945	2.39948
8.66	2.34694	4.05813	8.66	1.34855	2.05566
8.68	2.33542	3.96995	8.68	1.46075	2.3246
8.7	2.50759	3.89199	8.7	1.31348	2.38789
8.72	2.38874	4.00808	8.72	1.34145	2.6771
8.74	2.41362	3.80376	8.74	1.35501	2.67666
8.76	2.27631	3.74296	8.76	1.4202	2.81694
8.78	2.34573	3.74836	8.78	1.43202	2.43922
8.8	2.77531	4.02307	8.8	1.4276	2.97369
8.82	2.94356	3.97826	8.82	1.44866	2.74129
8.84	3.23046	3.98015	8.84	1.50227	2.59183
8.86	3.11838	3.97224	8.86	1.56552	3.05903
8.88	3.1733	3.97454	8.88	1.52134	2.90825
8.9	3.19544	4.07999	8.9	1.45118	2.48865
8.92	3.32781	4.09827	8.92	1.48505	2.1171
8.94	3.06227	4.14286	8.94	1.44115	2.61995
8.96	3.11385	3.7839	8.96	1.42973	2.48814
8.98	3.25262	3.54856	8.98	1.41756	1.81329
9	3.13341	3.78193	9	1.40061	2.03795
9.02	3.0701	3.71271	9.02	1.5682	1.95251
9.04	3.24675	3.52914	9.04	1.63398	1.96445
9.06	3.41535	3.66859	9.06	1.6232	2.48268
9.08	3.42659	3.73424	9.08	1.53334	1.73721
9.1	3.47823	3.92126	9.1	1.50088	1.7142
9.12	3.51345	4.02151	9.12	1.62424	1.75644
9.14	3.58509	3.92055	9.14	1.41172	1.9053
9.16	3.63272	3.68585	9.16	1.42859	1.55593
9.18	3.40601	3.9949	9.18	1.50341	1.53402
9.2	3.27245	4.07075	9.2	1.54716	1.67123
9.22	3.05027	4.07511	9.22	1.4895	1.89321
9.24	3.05176	4.08367	9.24	1.50491	2.93852
9.26	3.00815	4.00185	9.26	1.40536	2.69651
9.28	2.91451	3.84791	9.28	1.43041	2.99063
9.3	3.0112	3.89891	9.3	1.48699	2.66571
9.32	2.96344	3.97123	9.32	1.39226	2.67705
9.34	2.90525	3.90103	9.34	1.4284	2.89934
9.36	2.81102	4.04805	9.36	1.42872	3.26394
9.38	2.91146	3.78633	9.38	1.45466	2.08353
9.4	2.7489	3.84365	9.4	1.3393	2.09642
9.42	2.65383	3.2648	9.42	1.41363	2.75404
9.44	2.67372	3.51055	9.44	1.43401	3.04222
9.46	2.79582	3.30004	9.46	1.39571	3.12861
9.48	2.6003	3.47347	9.48	1.42505	2.98155
9.5	2.61499	3.30971	9.5	1.37804	2.71752
9.52	2.45876	3.54877	9.52	1.43311	3.1021
9.54	2.49707	3.82981	9.54	1.42707	2.80897
9.56	2.40096	3.86608	9.56	1.54306	3.03213
9.58	2.48414	4.04269	9.58	1.36164	2.35616
9.6	2.41843	4.18295	9.6	1.4614	2.2836
9.62	2.50629	3.98378	9.62	1.44352	2.07849
9.64	2.5286	3.69892	9.64	1.4137	2.23229
9.66	2.50875	3.95145	9.66	1.44753	2.51435
9.68	2.6275	3.86906	9.68	1.32506	2.86081
9.7	2.49681	3.78443	9.7	1.4063	2.16447
9.72	2.75259	3.84727	9.72	1.48123	2.60546
9.74	2.70998	3.70507	9.74	1.4964	2.46333
9.76	2.66815	3.4865	9.76	1.50866	2.48439
9.78	2.7432	3.77994	9.78	1.53456	2.37642
9.8	2.50855	3.81553	9.8	1.48953	1.95583
9.82	2.72558	4.00008	9.82	1.34523	2.26162
9.84	2.41334	3.78193	9.84	1.43989	2.49375
9.86	2.41691	3.89619	9.86	1.51235	2.13332
9.88	2.3816	3.85976	9.88	1.54343	1.66772
9.9	2.45713	3.9434	9.9	1.49665	1.61885
9.92	2.43411	3.87003	9.92	1.48813	1.94396
9.94	2.53342	3.73721	9.94	1.51273	1.61947
9.96	2.47937	3.82682	9.96	1.52309	1.45099
9.98	2.43748	3.77213	9.98	1.51827	1.83992
10	2.27936	3.79174	10	1.60416	1.84257
10.02	2.36349	3.70774	10.02	1.41851	1.62324
10.04	2.2536	3.57563	10.04	1.50058	1.78973
10.06	2.32703	3.61946	10.06	1.55103	2.08049
10.08	2.08302	3.59479	10.08	1.55029	2.42457
10.1	2.04996	3.78357	10.1	1.43408	2.50445
10.12	1.91853	3.86854	10.12	1.50662	2.36385
10.14	2.08126	3.87717	10.14	1.54992	2.32049
10.16	2.10941	3.77893	10.16	1.46796	2.50503
10.18	2.1848	3.68298	10.18	1.5216	2.89026
10.2	2.13879	3.81372	10.2	1.44448	2.93487
10.22	2.22707	3.6846	10.22	1.43011	2.80712
10.24	2.18727	3.43554	10.24	1.54405	2.89319
10.26	2.22502	3.49707	10.26	1.49438	3.17138
10.28	2.41118	3.48531	10.28	1.48695	3.1228
10.3	2.46473	3.62515	10.3	1.56277	2.97904
10.32	2.49303	4.09866	10.32	1.41938	2.94157
10.34	2.54486	3.65284	10.34	1.47234	2.78929
10.36	2.59724	3.33425	10.36	1.53375	2.7037
10.38	2.42879	3.63742	10.38	1.51349	2.93044
10.4	2.58858	3.7631	10.4	1.58463	2.99167
10.42	2.42921	3.73876	10.42	1.54214	2.82657
10.44	2.40631	3.58611	10.44	1.48264	3.08578
10.46	2.50485	4.02012	10.46	1.60426	2.93072
10.48	2.61677	3.81216	10.48	1.65417	2.99928
10.5	2.41139	3.52099	10.5	1.62529	2.50408
10.52	2.25593	4.04578	10.52	1.47345	2.70677
10.54	2.34502	3.66086	10.54	1.6591	2.77882
10.56	2.46506	3.86094	10.56	1.46635	2.14676
10.58	2.38615	3.85939	10.58	1.52683	1.85715
10.6	2.29338	3.68847	10.6	1.46461	2.16748
10.62	2.35281	3.92887	10.62	1.49663	1.71071
10.64	2.29896	4.13575	10.64	1.56803	2.08039
10.66	2.33097	4.0165	10.66	1.49201	1.9763
10.68	2.36685	4.00104	10.68	1.55611	2.32999
10.7	2.28346	3.7109	10.7	1.49097	2.37781
10.72	2.29604	3.759	10.72	1.49109	2.32808
10.74	2.53629	4.04661	10.74	1.48581	2.40324
10.76	2.46955	3.76243	10.76	1.44098	2.19153
10.78	2.49312	3.95151	10.78	1.48323	2.89462
10.8	2.3023	4.02262	10.8	1.51031	2.44034
10.82	2.42926	3.67577	10.82	1.34144	2.29559
10.84	2.25347	3.89604	10.84	1.39456	2.50515
10.86	2.2531	3.72146	10.86	1.26521	2.0413
10.88	2.39405	4.00936	10.88	1.42847	1.9337
10.9	2.35929	3.97552	10.9	1.26347	2.29732
10.92	2.26166	3.77967	10.92	1.30467	2.16906
10.94	2.32299	3.50869	10.94	1.36414	1.80961
10.96	2.37168	3.98512	10.96	1.30931	2.25804
10.98	2.41732	3.49341	10.98	1.2557	1.72238
11	2.50422	3.9298	11	1.37239	2.15325
11.02	2.62359	4.03145	11.02	1.3822	2.00107
11.04	2.69723	3.90636	11.04	1.36678	2.03007
11.06	2.6545	3.9179	11.06	1.40557	1.93393
11.08	2.53747	3.93847	11.08	1.31077	2.66238
11.1	2.92023	4.04876	11.1	1.33904	2.33179
11.12	2.69572	3.89933	11.12	1.35787	2.4865
11.14	2.63904	3.87323	11.14	1.37737	3.23919
11.16	2.76052	4.08942	11.16	1.46357	2.20846
11.18	2.60408	3.8022	11.18	1.51165	2.05951
11.2	2.57155	3.89075	11.2	1.43283	2.4035
11.22	2.56754	3.91496	11.22	1.46086	2.85122
11.24	2.4724	4.08666	11.24	1.29039	2.42006
11.26	2.38517	3.79101	11.26	1.2874	2.48054
11.28	2.40385	3.91089	11.28	1.37726	1.61642
11.3	2.38226	4.09404	11.3	1.27621	2.60297
11.32	2.31658	3.79651	11.32	1.41301	2.20904
11.34	2.49667	3.84257	11.34	1.44963	2.67431
11.36	2.4665	3.79907	11.36	1.44336	1.76267
11.38	2.32012	3.98545	11.38	1.4082	2.55869
11.4	2.60263	3.73642	11.4	1.51898	2.83805
11.42	2.60644	3.39552	11.42	1.47653	2.95753
11.44	2.37381	3.5948	11.44	1.42316	2.50043
11.46	2.43641	3.74232	11.46	1.41279	1.91761
11.48	2.34177	3.6454	11.48	1.40516	2.1387
11.5	2.32393	3.74285	11.5	1.46784	1.74354
11.52	2.23961	3.7573	11.52	1.53248	1.64627
11.54	2.21306	3.72085	11.54	1.46515	1.87791
11.56	2.33514	3.93852	11.56	1.43431	1.83358
11.58	2.38378	3.65292	11.58	1.39674	1.94605
11.6	2.61138	3.93621	11.6	1.44133	1.9215
11.62	2.43264	3.73081	11.62	1.51343	2.00134
11.64	2.39156	3.8803	11.64	1.41222	1.99589
11.66	2.41875	3.45993	11.66	1.40882	2.13361
11.68	2.5522	3.21122	11.68	1.53408	2.30403
11.7	2.60025	3.49481	11.7	1.48321	2.50275
11.72	2.56921	3.84075	11.72	1.47954	2.24506
11.74	2.51501	3.83803	11.74	1.49728	2.17382
11.76	2.48074	3.88349	11.76	1.4357	2.07976
11.78	2.54575	3.76771	11.78	1.40824	2.21658
11.8	2.63313	3.49503	11.8	1.54379	2.40627
11.82	2.41243	3.86379	11.82	1.53179	2.0783
11.84	2.41774	3.77219	11.84	1.46724	1.63802
11.86	2.58531	3.76078	11.86	1.48811	1.9944
11.88	2.57074	3.92867	11.88	1.46778	2.11411
11.9	2.47122	3.84821	11.9	1.41882	2.33263
11.92	2.5787	3.6597	11.92	1.53755	2.39378
11.94	2.47019	3.57978	11.94	1.54353	2.37534
11.96	2.3217	3.82829	11.96	1.44872	2.45703
11.98	2.39048	4.05596	11.98	1.46691	2.28246
12	2.38127	3.86597	12	1.53796	2.67257
12.02	2.41595	3.6582	12.02	1.47441	2.36684
12.04	2.5667	3.9327	12.04	1.55716	1.86048
12.06	2.58226	3.73726	12.06	1.56207	1.77901
12.08	2.49271	3.77101	12.08	1.57242	1.70753
12.1	2.59849	3.604	12.1	1.54122	1.88167
12.12	2.6543	3.48272	12.12	1.56819	2.01301
12.14	2.72436	3.5052	12.14	1.48163	2.01356
12.16	2.62933	3.78693	12.16	1.58069	1.89854
12.18	2.42381	3.22677	12.18	1.60935	1.82167
12.2	2.58085	3.85321	12.2	1.53297	1.62851
12.22	2.40995	3.84873	12.22	1.66063	2.09515
12.24	2.41399	3.97088	12.24	1.59163	1.94918
12.26	2.42131	4.01612	12.26	1.53562	1.77012
12.28	2.43351	3.77093	12.28	1.5391	1.71969
12.3	2.43134	3.73042	12.3	1.56372	2.22603
12.32	2.37323	3.72818	12.32	1.46917	1.70328
12.34	2.1153	3.71715	12.34	1.57335	1.82176
12.36	2.18293	3.69089	12.36	1.53213	1.90419
12.38	2.33881	3.26155	12.38	1.41657	1.4942
12.4	2.26808	3.42732	12.4	1.56539	1.74917
12.42	2.19487	3.15815	12.42	1.46564	2.30505
12.44	2.3836	3.80944	12.44	1.42067	2.1461
12.46	2.18528	4.18018	12.46	1.47054	2.22174
12.48	2.32954	3.63639	12.48	1.50878	1.7396
12.5	2.38775	3.55104	12.5	1.52664	1.28705
12.52	2.42472	3.91287	12.52	1.62339	2.33599
12.54	2.24938	4.01078	12.54	1.51709	2.32473
12.56	2.3622	3.76945	12.56	1.43881	2.48252
12.58	2.44291	3.96205	12.58	1.41689	2.21018
12.6	2.45058	3.91136	12.6	1.61257	1.8796
12.62	2.40028	3.43338	12.62	1.3628	2.02498
12.64	2.41231	3.39403	12.64	1.46742	1.811
12.66	2.24838	3.43038	12.66	1.49547	1.95942
12.68	2.26566	3.54763	12.68	1.4751	2.16315
12.7	2.19908	3.68812	12.7	1.44191	2.4375
12.72	2.40556	3.93888	12.72	1.57974	2.42196
12.74	2.39314	3.85881	12.74	1.56512	2.50272
12.76	2.53864	3.9525	12.76	1.48095	1.8123
12.78	2.57898	3.75131	12.78	1.47984	2.19755
12.8	2.33482	3.87897	12.8	1.4589	2.32252
12.82	2.48056	4.2534	12.82	1.25154	2.28758
12.84	2.40607	3.83021	12.84	1.28732	2.3625
12.86	2.39187	4.07699	12.86	1.4388	2.60231
12.88	2.45557	3.90195	12.88	1.30863	2.44494
12.9	2.32285	4.0115	12.9	1.40871	2.16404
12.92	2.27138	3.6769	12.92	1.50182	2.01798
12.94	2.34147	3.23773	12.94	1.42475	1.74587
12.96	2.24849	3.17894	12.96	1.38728	2.21426
12.98	2.28089	3.43397	12.98	1.45515	2.45174
13	2.2272	3.12972	13	1.46029	1.95982
13.02	2.32258	3.23196	13.02	1.46187	2.27129
13.04	2.33937	3.5778	13.04	1.40302	2.35651
13.06	2.46568	3.40317	13.06	1.51114	1.8674
13.08	2.6773	3.57423	13.08	1.36005	1.82756
13.1	2.56787	3.58659	13.1	1.44131	1.28195
13.12	2.38945	3.53304	13.12	1.41356	2.01437
13.14	2.36577	3.57076	13.14	1.46545	2.31994
13.16	2.08548	3.47502	13.16	1.50496	1.95731
13.18	2.28165	3.08615	13.18	1.36334	2.25136
13.2	2.21075	3.43852	13.2	1.50655	2.30668
13.22	2.27735	3.31334	13.22	1.55654	2.62338
13.24	2.30221	3.61574	13.24	1.5304	2.64015
13.26	2.22023	3.49764	13.26	1.55692	2.73664
13.28	2.1919	3.40654	13.28	1.52919	2.12624
13.3	2.32835	3.52679	13.3	1.57576	1.7877
13.32	2.15717	3.39709	13.32	1.50859	1.9304
13.34	2.32762	3.03054	13.34	1.5863	2.41694
13.36	2.21844	3.28932	13.36	1.57149	2.34151
13.38	2.34645	3.44178	13.38	1.53041	2.35892
13.4	2.31793	3.59373	13.4	1.52749	1.61186
13.42	2.2861	3.75469	13.42	1.4927	1.76894
13.44	2.23648	3.35441	13.44	1.46283	2.3743
13.46	2.25996	3.39485	13.46	1.44416	1.92208
13.48	2.14064	3.5331	13.48	1.55719	2.2044
13.5	2.1212	3.52638	13.5	1.43967	2.43707
13.52	2.07537	3.46737	13.52	1.47335	2.68062
13.54	2.0323	3.28609	13.54	1.56506	2.59867
13.56	2.12415	3.57629	13.56	1.62287	2.3717
13.58	2.10062	3.52515	13.58	1.65939	2.25383
13.6	2.36721	3.29834	13.6	1.58609	1.95797
13.62	2.31032	3.37317	13.62	1.59371	2.22034
13.64	2.54452	3.50549	13.64	1.57583	2.37307
13.66	2.66431	3.53233	13.66	1.62939	2.10964
13.68	2.56917	3.24907	13.68	1.53421	2.27072
13.7	2.42357	3.13092	13.7	1.5312	2.14255
13.72	2.29019	3.46849	13.72	1.50089	2.36558
13.74	2.36387	3.16897	13.74	1.49142	1.42409
13.76	2.36434	3.5091	13.76	1.62834	1.85485
13.78	2.41378	3.78369	13.78	1.62852	1.24299
13.8	2.55564	3.62741	13.8	1.55014	2.11974
13.82	2.40859	3.35981	13.82	1.58808	2.71461
13.84	2.4388	3.01958	13.84	1.56978	2.92099
13.86	2.60259	3.40132	13.86	1.52647	3.07594
13.88	2.52777	4.02856	13.88	1.41205	2.87956
13.9	2.42916	3.98703	13.9	1.46903	2.58888
13.92	2.53601	3.92063	13.92	1.52103	2.54234
13.94	2.46041	3.93578	13.94	1.61059	2.70398
13.96	2.56602	3.76643	13.96	1.50118	2.64797
13.98	2.39715	3.93526	13.98	1.51648	2.53255
14	2.27002	4.00246	14	1.53187	2.52716
14.02	2.28548	3.77667	14.02	1.48014	2.49632
14.04	2.40066	4.03358	14.04	1.50283	3.05539
14.06	2.4373	4.02531	14.06	1.47591	3.22542
14.08	2.4304	4.04943	14.08	1.58001	3.17036
14.1	2.36055	4.01339	14.1	1.62364	3.26751
14.12	2.38572	4.01641	14.12	1.56112	3.19171
14.14	2.19405	4.01751	14.14	1.60961	2.85907
14.16	2.32356	3.96382	14.16	1.61171	2.58347
14.18	2.43088	3.83802	14.18	1.72359	2.9209
14.2	2.50145	3.686	14.2	1.6871	2.4309
14.22	2.4358	3.27371	14.22	1.76173	1.4124
14.24	2.38856	3.9699	14.24	1.86205	1.22966
14.26	2.40302	3.54307	14.26	1.69614	1.64368
14.28	2.40328	3.55862	14.28	1.7965	1.9496
14.3	2.48432	3.89669	14.3	1.73111	2.78439
14.32	2.47211	3.66645	14.32	1.76472	3.07022
14.34	2.44795	3.46187	14.34	1.7585	2.69408
14.36	2.37913	3.7226	14.36	1.73321	2.45687
14.38	2.37278	3.7241	14.38	1.86124	2.01325
14.4	2.59841	3.48223	14.4	1.90992	1.68921
14.42	2.72649	3.50005	14.42	1.76681	1.36843
14.44	2.83101	3.52574	14.44	1.72873	1.9824
14.46	2.72682	3.6956	14.46	1.71485	1.91732
14.48	2.61215	3.56715	14.48	1.82547	2.22548
14.5	2.63156	3.1368	14.5	1.71683	2.6827
14.52	2.56692	3.09771	14.52	1.73865	2.73401
14.54	2.50881	3.02437	14.54	1.74634	2.81948
14.56	2.65431	3.01359	14.56	1.64778	2.20011
14.58	2.79965	2.98299	14.58	1.5693	2.97758
14.6	2.51637	3.25047	14.6	1.59349	2.8818
14.62	2.45851	3.27685	14.62	1.56773	2.72727
14.64	2.53025	3.26357	14.64	1.65599	3.11746
14.66	2.81722	3.36181	14.66	1.54937	2.95615
14.68	2.59861	3.63617	14.68	1.56482	2.69251
14.7	2.45149	3.31851	14.7	1.70671	3.21933
14.72	2.62334	2.98965	14.72	1.49435	2.43596
14.74	2.72789	3.34253	14.74	1.51518	1.34641
14.76	2.81651	3.1179	14.76	1.59252	2.05364
14.78	2.75564	3.30885	14.78	1.65538	1.43243
14.8	2.82189	3.10787	14.8	1.55205	1.31748
14.82	3.01434	2.80834	14.82	1.64599	2.03072
14.84	3.17593	2.9585	14.84	1.46206	2.22469
14.86	3.18253	2.98962	14.86	1.49167	2.23468
14.88	3.00854	3.08582	14.88	1.68097	1.9991
14.9	3.07179	2.94881	14.9	1.65879	1.91097
14.92	3.25388	3.30628	14.92	1.65586	1.89519
14.94	3.24435	3.28342	14.94	1.68661	2.32387
14.96	3.41205	3.37368	14.96	1.74479	1.63826
14.98	3.21949	3.21851	14.98	1.72171	1.77789
15	3.10509	3.20532	15	1.57865	1.91285
15.02	3.19362	3.03456	15.02	1.59373	2.24058
15.04	3.06812	3.37749	15.04	1.63923	1.81642
15.06	3.11878	3.13727	15.06	1.6377	1.65833
15.08	3.07963	3.37405	15.08	1.46392	1.12993
15.1	3.00765	3.13902	15.1	1.57648	1.14285
15.12	3.15183	3.19746	15.12	1.53354	1.70366
15.14	3.20456	2.90514	15.14	1.49475	2.08033
15.16	3.07862	3.01799	15.16	1.55149	2.09008
15.18	2.96387	3.05273	15.18	1.56232	2.35885
15.2	2.89497	3.14125	15.2	1.54923	2.57137
15.22	3.1245	3.33491	15.22	1.54779	2.30425
15.24	2.94164	3.02868	15.24	1.52449	2.11102
15.26	3.10498	2.96122	15.26	1.42295	2.26946
15.28	3.27976	2.8162	15.28	1.36266	2.35047
15.3	3.0612	2.91398	15.3	1.40717	2.45039
15.32	2.89197	2.95782	15.32	1.57853	2.00793
15.34	3.07393	2.85027	15.34	1.4526	1.79112
15.36	3.04861	3.31432	15.36	1.54142	3.00437
15.38	2.99367	3.01192	15.38	1.57195	2.92739
15.4	3.05137	3.03165	15.4	1.41792	2.9533
15.42	2.93447	3.0997	15.42	1.44724	2.95279
15.44	2.96299	3.18493	15.44	1.52963	3.00243
15.46	2.73507	3.26351	15.46	1.59141	3.10335
15.48	2.79689	3.02002	15.48	1.58808	2.97003
15.5	2.75029	2.8008	15.5	1.60828	2.90192
15.52	3.09948	3.12666	15.52	1.49533	2.83272
15.54	2.78515	2.58016	15.54	1.41127	2.93275
15.56	2.80008	2.36316	15.56	1.4328	2.8273
15.58	2.64464	2.71258	15.58	1.43804	3.01515
15.6	2.84099	2.74531	15.6	1.50845	3.00239
15.62	2.95046	2.50559	15.62	1.4667	2.90631
15.64	2.63912	2.82564	15.64	1.50971	2.51097
15.66	3.09959	2.64569	15.66	1.36297	2.64904
15.68	3.06209	2.73514	15.68	1.52567	2.76284
15.7	3.08132	2.62506	15.7	1.50496	2.84045
15.72	3.02099	2.97319	15.72	1.57967	2.97635
15.74	2.88218	2.67772	15.74	1.50039	3.04727
15.76	3.2524	3.21929	15.76	1.3855	3.0572
15.78	3.40404	2.58484	15.78	1.4151	2.80549
15.8	3.47842	2.61431	15.8	1.50363	2.68643
15.82	3.42448	2.61531	15.82	1.42037	2.68699
15.84	3.50448	2.97392	15.84	1.3944	2.40357
15.86	3.66543	2.8846	15.86	1.58291	2.97714
15.88	3.66045	2.89409	15.88	1.54025	2.64626
15.9	3.73334	2.42006	15.9	1.46896	2.97936
15.92	3.55157	2.39267	15.92	1.4605	2.51457
15.94	3.57738	3.31757	15.94	1.42929	2.29959
15.96	3.43176	2.67442	15.96	1.50309	2.6954
15.98	3.32579	2.93613	15.98	1.52415	2.881
16	3.10207	2.93033	16	1.43469	2.66587
16.02	3.39649	2.57027	16.02	1.54302	3.05066
16.04	3.27191	3.02699	16.04	1.4065	2.66559
16.06	3.28532	2.94677	16.06	1.44612	2.94479
16.08	3.17037	3.10804	16.08	1.42796	3.03072
16.1	3.17393	2.72626	16.1	1.45185	2.69703
16.12	3.32171	2.69956	16.12	1.48897	2.37913
16.14	3.36997	2.90087	16.14	1.38961	2.39821
16.16	3.46064	2.76315	16.16	1.49396	2.49105
16.18	3.46319	2.16812	16.18	1.49877	2.24907
16.2	3.50832	2.62725	16.2	1.55369	2.76963
16.22	3.52717	2.69848	16.22	1.49109	2.60718
16.24	3.51003	2.83627	16.24	1.5338	2.67172
16.26	3.35688	2.59762	16.26	1.53765	2.43004
16.28	3.51935	2.8921	16.28	1.44324	2.73572
16.3	3.32835	2.5659	16.3	1.49944	2.86665
16.32	3.41343	2.9726	16.32	1.40155	2.79248
16.34	3.41699	2.82784	16.34	1.42631	2.99599
16.36	3.52416	2.72297	16.36	1.60722	2.86519
16.38	3.50504	2.70805	16.38	1.52642	2.77249
16.4	3.50496	2.65508	16.4	1.6264	2.94386
16.42	3.44034	2.61973	16.42	1.57037	2.95984
16.44	3.51813	2.57608	16.44	1.5505	2.8741
16.46	3.51909	2.8672	16.46	1.54962	2.52658
16.48	3.54148	2.65304	16.48	1.55023	2.66192
16.5	3.46696	2.87134	16.5	1.61443	2.06058
16.52	3.2607	2.29764	16.52	1.64915	2.31525
16.54	3.3199	2.69114	16.54	1.5178	2.04593
16.56	3.50413	3.11802	16.56	1.56418	2.47681
16.58	3.34683	3.14286	16.58	1.51156	1.97969
16.6	3.35571	2.85343	16.6	1.56546	1.58631
16.62	3.37454	3.00138	16.62	1.62242	1.32953
16.64	3.3367	2.63782	16.64	1.61422	2.42393
16.66	3.36759	2.64678	16.66	1.50421	2.74227
16.68	3.22573	2.64813	16.68	1.57436	2.23922
16.7	3.07443	2.36301	16.7	1.55103	1.55601
16.72	3.14813	2.59451	16.72	1.54376	1.93781
16.74	3.05714	2.64957	16.74	1.54841	1.9007
16.76	3.20374	2.56012	16.76	1.58264	2.52146
16.78	3.2711	3.1852	16.78	1.52336	2.50221
16.8	3.17378	3.01747	16.8	1.56629	2.34111
16.82	3.04362	2.73888	16.82	1.57704	1.78659
16.84	2.9097	3.49114	16.84	1.57945	2.3153
16.86	2.79216	3.49414	16.86	1.43454	1.93877
16.88	3.01218	3.34722	16.88	1.49283	1.94783
16.9	2.7403	3.221	16.9	1.47819	1.92433
16.92	2.881	2.90468	16.92	1.50566	2.13892
16.94	2.88522	2.96127	16.94	1.47193	2.49025
16.96	3.1281	2.83069	16.96	1.55758	2.3441
16.98	3.23367	3.10945	16.98	1.38423	2.58799
17	3.22695	3.03941	17	1.50026	2.61787
17.02	3.28321	3.05823	17.02	1.48783	2.26077
17.04	3.44501	3.04139	17.04	1.48205	1.93893
17.06	3.58335	2.9975	17.06	1.55077	2.3619
17.08	3.4693	3.16342	17.08	1.68614	2.21039
17.1	3.70908	3.08742	17.1	1.59761	1.82728
17.12	3.84676	2.94765	17.12	1.45423	2.2365
17.14	3.71863	2.47141	17.14	1.53587	1.70528
17.16	3.87136	2.53001	17.16	1.61171	1.78314
17.18	3.8704	2.86968	17.18	1.5561	2.10941
17.2	4.05465	2.66035	17.2	1.58196	1.70087
17.22	4.02775	2.37063	17.22	1.59119	1.88458
17.24	3.83466	2.35959	17.24	1.54186	1.91449
17.26	3.84257	2.71265	17.26	1.55525	1.76787
17.28	3.67726	1.84892	17.28	1.51978	2.03434
17.3	3.77968	2.18488	17.3	1.40473	1.64425
17.32	3.62571	1.92569	17.32	1.49069	2.60649
17.34	3.52003	2.65096	17.34	1.48178	2.11321
17.36	3.61687	1.99732	17.36	1.47741	2.00981
17.38	3.81753	2.32556	17.38	1.38495	2.44941
17.4	3.87775	2.17949	17.4	1.43899	2.30496
17.42	3.79948	1.80768	17.42	1.45618	2.71192
17.44	3.70841	2.41546	17.44	1.51099	2.6355
17.46	3.69714	2.30295	17.46	1.43072	1.76513
17.48	3.67556	2.29976	17.48	1.53977	2.50735
17.5	3.59916	2.3684	17.5	1.47933	2.68311
17.52	3.47698	2.31394	17.52	1.43464	2.91319
17.54	3.41291	2.31867	17.54	1.49567	2.92087
17.56	3.49232	2.53325	17.56	1.52972	2.32008
17.58	3.67694	1.87906	17.58	1.47047	1.96725
17.6	3.80434	2.2346	17.6	1.58035	1.60787
17.62	3.67793	3.33625	17.62	1.52634	1.8283
17.64	3.51403	3.14926	17.64	1.42134	2.65189
17.66	3.62228	2.59404	17.66	1.54854	2.15501
17.68	3.67313	2.39409	17.68	1.44749	2.06473
17.7	3.8833	1.91389	17.7	1.45615	2.60985
17.72	3.77843	2.36975	17.72	1.47135	2.93098
17.74	3.78671	2.60455	17.74	1.55682	2.80083
17.76	3.85828	2.4649	17.76	1.58958	2.71985
17.78	3.7306	2.1904	17.78	1.5091	2.88144
17.8	3.64659	2.35405	17.8	1.46432	2.92659
17.82	3.64345	2.65091	17.82	1.56634	2.8872
17.84	3.5551	2.35915	17.84	1.58113	2.99862
17.86	3.64595	3.24376	17.86	1.58318	2.73443
17.88	3.53107	3.08184	17.88	1.60052	2.77449
17.9	3.46014	3.25297	17.9	1.5908	3.13339
17.92	3.547	3.1082	17.92	1.60059	2.74353
17.94	3.33097	3.30327	17.94	1.67412	2.2628
17.96	3.44983	3.18052	17.96	1.53171	1.3983
17.98	3.33494	3.06351	17.98	1.47132	1.90061
18	3.49232	2.99806	18	1.4545	2.01226
18.02	3.5615	3.30573	18.02	1.38329	2.1059
18.04	3.48626	3.2178	18.04	1.43515	2.57422
18.06	3.61625	3.39902	18.06	1.51348	2.44861
18.08	3.64882	3.05404	18.08	1.51472	2.21871
18.1	3.59966	2.68485	18.1	1.47599	2.31764
18.12	3.65867	2.35027	18.12	1.48778	2.46637
18.14	3.85944	2.65765	18.14	1.39792	1.8585
18.16	3.80209	3.01816	18.16	1.50931	1.88359
18.18	3.954	2.74706	18.18	1.48552	2.29024
18.2	3.80704	2.84028	18.2	1.53115	2.31779
18.22	3.76468	2.53031	18.22	1.52919	2.6594
18.24	3.81229	1.95309	18.24	1.60575	2.50607
18.26	3.66193	2.15539	18.26	1.60587	1.69355
18.28	3.60281	3.02881	18.28	1.5469	2.06728
18.3	3.54216	2.07492	18.3	1.76573	2.50173
18.32	3.4568	1.31515	18.32	1.54082	1.84981
18.34	3.32668	1.28913	18.34	1.54224	1.97717
18.36	3.32592	2.2199	18.36	1.48949	2.7562
18.38	3.42922	2.19626	18.38	1.60146	1.73077
18.4	3.27558	1.46021	18.4	1.64532	1.70036
18.42	3.28638	1.76921	18.42	1.62617	1.9327
18.44	3.1646	2.23795	18.44	1.6086	1.74368
18.46	3.3647	3.2097	18.46	1.63651	2.55624
18.48	3.43185	2.99531	18.48	1.53106	1.96767
18.5	3.50747	3.02675	18.5	1.60081	2.35979
18.52	3.26934	2.86336	18.52	1.65522	2.67124
18.54	3.19925	3.2652	18.54	1.63909	2.86639
18.56	3.4559	3.21007	18.56	1.65441	2.90129
18.58	3.61284	3.08037	18.58	1.75286	2.86039
18.6	3.64636	3.07034	18.6	1.59492	2.93926
18.62	3.68649	3.33351	18.62	1.59436	2.88323
18.64	3.7339	3.07935	18.64	1.71158	3.28443
18.66	3.64512	2.85901	18.66	1.72723	3.05074
18.68	3.53322	3.20654	18.68	1.8393	3.28878
18.7	3.41824	2.90861	18.7	1.85378	3.39076
18.72	3.39577	3.47821	18.72	1.70803	3.60086
18.74	3.48678	2.72598	18.74	1.7537	3.50119
18.76	3.39815	3.25422	18.76	1.74601	2.86183
18.78	3.40682	3.01722	18.78	1.76026	3.21043
18.8	3.29095	3.12674	18.8	1.61758	2.94025
18.82	3.29953	2.22339	18.82	1.74987	2.78019
18.84	3.29453	2.481	18.84	1.82304	3.39721
18.86	3.29685	2.04549	18.86	1.75195	2.93079
18.88	3.48769	2.03221	18.88	1.70347	3.10152
18.9	3.36758	2.36612	18.9	1.6802	3.28383
18.92	3.27613	2.9892	18.92	1.86233	3.18488
18.94	3.23361	2.9208	18.94	1.83225	2.87325
18.96	3.18724	3.1137	18.96	1.92174	3.2875
18.98	3.32479	2.97266	18.98	1.7763	2.9621
19	3.36406	2.993	19	1.7676	2.25368
19.02	3.33905	3.28273	19.02	1.83036	2.00605
19.04	3.46819	3.43788	19.04	1.64936	2.31053
19.06	3.20428	3.33547	19.06	1.76752	2.45559
19.08	3.27317	2.87589	19.08	1.709	2.40745
19.1	3.52016	3.24827	19.1	1.70264	2.64838
19.12	3.58402	3.05818	19.12	1.56254	2.65328
19.14	3.34244	2.68104	19.14	1.63733	2.74195
19.16	3.38589	2.75313	19.16	1.57225	2.75861
19.18	3.31073	3.01221	19.18	1.64471	1.9285
19.2	3.38049	3.21911	19.2	1.71534	2.18241
19.22	3.58551	2.56994	19.22	1.7378	2.70168
19.24	3.50361	2.39843	19.24	1.5977	2.84504
19.26	3.70567	2.70422	19.26	1.60933	2.99767
19.28	3.81021	2.70204	19.28	1.50745	2.56774
19.3	3.73991	2.6719	19.3	1.66064	3.20835
19.32	3.62804	3.24891	19.32	1.70308	3.31034
19.34	3.73782	3.33356	19.34	1.61054	2.84695
19.36	3.60769	3.18843	19.36	1.65434	3.17013
19.38	3.47558	3.24624	19.38	1.6618	3.31211
19.4	3.58969	2.99486	19.4	1.58529	3.3851
19.42	3.62246	3.47441	19.42	1.53429	3.62936
19.44	3.67528	3.50923	19.44	1.58867	3.57971
19.46	3.67409	3.08011	19.46	1.43714	3.52125
19.48	3.81166	3.03477	19.48	1.59748	3.41962
19.5	3.8598	2.76335	19.5	1.64748	3.47531
19.52	3.89697	2.91936	19.52	1.58789	3.65025
19.54	3.77557	3.16391	19.54	1.63503	3.50267
19.56	3.8705	2.46437	19.56	1.71135	3.57609
19.58	3.72817	2.42664	19.58	1.76719	3.41832
19.6	3.63114	2.01247	19.6	1.62563	3.4513
19.62	3.54782	1.73764	19.62	1.77031	3.41478
19.64	3.5889	1.24943	19.64	1.64289	3.31112
19.66	3.45202	1.36793	19.66	1.65251	3.57225
19.68	3.61474	0.934094	19.68	1.65681	3.48524
19.7	3.45209	0.613661	19.7	1.75054	3.51181
19.72	3.58304	0.699734	19.72	1.60413	3.43978
19.74	3.57344	0.750013	19.74	1.6361	3.71971
19.76	3.66593	0.528	19.76	1.71825	3.50132
19.78	3.63087	0.922485	19.78	1.64116	3.55942
19.8	3.37241	0.672171	19.8	1.54813	3.47053
19.82	3.15843	0.708519	19.82	1.60842	3.53079
19.84	3.38928	0.587994	19.84	1.60254	3.35385
19.86	3.13865	0.929469	19.86	1.48945	3.43142
19.88	3.26748	0.640041	19.88	1.50766	3.55195
19.9	3.29942	0.718833	19.9	1.56985	3.57779
19.92	3.31387	0.561891	19.92	1.5582	3.6056
19.94	3.32757	0.57658	19.94	1.70302	3.44488
19.96	3.25201	0.537326	19.96	1.62862	3.59346
19.98	3.26659	0.948602	19.98	1.5195	3.59389
20	3.37519	1.16276	20	1.53933	3.27238
20.02	3.2397	0.568422	20.02	1.51053	2.9533
20.04	3.15581	0.672261	20.04	1.46985	3.50424
20.06	3.10906	0.791795	20.06	1.47962	3.54427
20.08	3.09726	1.1923	20.08	1.56708	3.16038
20.1	3.07805	1.25518	20.1	1.53533	2.86144
20.12	2.90715	1.54877	20.12	1.49146	3.06275
20.14	2.94472	1.71105	20.14	1.5048	2.40227
20.16	2.99212	1.02351	20.16	1.54766	2.67851
20.18	3.01254	0.889615	20.18	1.68492	2.50755
20.2	3.16619	0.597659	20.2	1.64	2.61142
20.22	3.26972	0.834479	20.22	1.6072	2.25961
20.24	3.35417	0.673089	20.24	1.77415	2.28261
20.26	3.26184	0.600653	20.26	1.59348	2.155
20.28	3.1714	0.692169	20.28	1.49816	2.31432
20.3	3.23825	0.813273	20.3	1.5186	2.04603
20.32	3.18227	0.792318	20.32	1.55844	2.27168
20.34	3.24243	1.33488	20.34	1.48017	2.29036
20.36	3.33492	1.20876	20.36	1.45511	3.17495
20.38	3.17678	1.34846	20.38	1.60795	2.59478
20.4	3.37761	1.03029	20.4	1.64808	2.55012
20.42	3.47026	1.50468	20.42	1.5269	3.19575
20.44	3.66965	1.19405	20.44	1.53655	2.80874
20.46	3.89511	1.434	20.46	1.44618	2.94272
20.48	3.82131	2.35502	20.48	1.44392	2.19734
20.5	3.68057	1.84545	20.5	1.60565	1.99823
20.52	3.80583	2.02332	20.52	1.60713	2.26802
20.54	3.89176	2.0229	20.54	1.613	2.30615
20.56	3.87144	2.05282	20.56	1.62215	2.22176
20.58	3.63798	1.69879	20.58	1.66167	2.0743
20.6	3.59505	1.84349	20.6	1.66221	2.0552
20.62	3.7352	1.79675	20.62	1.60109	2.42764
20.64	3.78611	2.32927	20.64	1.69363	2.51391
20.66	3.73402	2.02728	20.66	1.62663	2.65717
20.68	3.6825	1.90696	20.68	1.53971	2.42658
20.7	3.87022	1.56819	20.7	1.52414	2.31815
20.72	3.81479	1.66687	20.72	1.54738	2.35403
20.74	3.87963	1.93595	20.74	1.61351	2.54131
20.76	3.82318	1.93764	20.76	1.565	2.31055
20.78	3.71774	2.31769	20.78	1.63176	2.33064
20.8	3.55572	2.2935	20.8	1.5966	2.20474
20.82	3.67275	2.46197	20.82	1.51678	2.37421
20.84	3.65885	1.89209	20.84	1.40702	2.72389
20.86	3.60182	1.82257	20.86	1.4397	2.3583
20.88	3.53999	1.90398	20.88	1.55229	2.36763
20.9	3.67775	2.18885	20.9	1.59564	2.21776
20.92	3.7631	1.72044	20.92	1.60782	2.34764
20.94	3.6646	1.77953	20.94	1.65515	2.55662
20.96	3.79593	1.87262	20.96	1.66355	2.48699
20.98	3.80277	2.21835	20.98	1.62308	2.37275
21	3.87456	2.2627	21	1.6267	2.28509
21.02	3.78548	2.22502	21.02	1.6873	2.43131
21.04	3.68746	1.63111	21.04	1.51348	2.5829
21.06	3.72724	2.29163	21.06	1.57306	2.50226
21.08	3.82335	2.15457	21.08	1.48553	2.55239
21.1	3.57422	2.01165	21.1	1.58345	2.64861
21.12	3.47272	1.9903	21.12	1.59183	2.49358
21.14	3.51297	1.49141	21.14	1.53031	2.18588
21.16	3.64268	1.40241	21.16	1.54469	2.50446
21.18	3.43556	1.12625	21.18	1.51844	2.65799
21.2	3.4295	1.20904	21.2	1.58379	2.55851
21.22	3.50989	1.45662	21.22	1.53839	2.62933
21.24	3.44441	0.98085	21.24	1.58213	2.27065
21.26	3.59096	1.48874	21.26	1.5654	2.42079
21.28	3.58489	0.799568	21.28	1.48202	2.32404
21.3	3.54664	0.876935	21.3	1.55493	2.50352
21.32	3.5754	1.08345	21.32	1.59282	2.49675
21.34	3.42385	0.604621	21.34	1.62282	2.48299
21.36	3.37917	0.864168	21.36	1.54736	2.26653
21.38	3.30888	0.784415	21.38	1.54364	2.50117
21.4	3.22838	1.27483	21.4	1.65757	2.56305
21.42	3.30166	0.686734	21.42	1.6678	2.50568
21.44	3.48335	0.599275	21.44	1.79576	2.53413
21.46	3.47372	0.697797	21.46	1.78279	2.42021
21.48	3.64756	0.942146	21.48	1.73952	2.18507
21.5	3.71582	0.845454	21.5	1.64471	2.25494
21.52	3.48492	0.504995	21.52	1.68593	2.23053
21.54	3.48935	0.517445	21.54	1.55057	2.30388
21.56	3.46579	0.609774	21.56	1.74562	2.38398
21.58	3.65497	0.786708	21.58	1.73713	2.27698
21.6	3.76982	0.959597	21.6	1.67121	2.58128
21.62	3.52343	1.35887	21.62	1.63572	2.35215
21.64	3.47995	1.16526	21.64	1.71786	2.46826
21.66	3.35094	0.911544	21.66	1.70937	2.59787
21.68	3.51745	0.650633	21.68	1.6824	2.55428
21.7	3.3638	0.493931	21.7	1.65834	2.34742
21.72	3.40086	0.921465	21.72	1.73241	2.34115
21.74	3.52394	0.768053	21.74	1.69632	2.15261
21.76	3.49951	1.28956	21.76	1.72392	2.43006
21.78	3.41108	1.42668	21.78	1.62323	2.51032
21.8	3.24706	0.846479	21.8	1.64356	2.40848
21.82	3.17168	1.06667	21.82	1.51716	2.87217
21.84	3.24198	1.32462	21.84	1.62319	2.6582
21.86	2.94816	1.40204	21.86	1.62763	2.21953
21.88	3.06263	0.74973	21.88	1.62354	2.37858
21.9	3.09978	0.854808	21.9	1.70861	2.20997
21.92	3.1821	0.59931	21.92	1.63199	2.1275
21.94	3.2163	0.916277	21.94	1.61987	2.14242
21.96	3.32276	0.500385	21.96	1.66822	2.63836
21.98	3.4374	0.7811	21.98	1.69953	2.39764
22	3.49472	0.671606	22	1.60882	2.24473
22.02	3.50201	0.696232	22.02	1.66714	2.20322
22.04	3.64332	0.73684	22.04	1.61544	2.13608
22.06	3.64882	0.708389	22.06	1.68987	2.19629
22.08	3.49076	0.807729	22.08	1.68498	2.56803
22.1	3.50801	0.639727	22.1	1.72542	2.00221
22.12	3.56577	0.822488	22.12	1.66587	2.35593
22.14	3.5367	0.529785	22.14	1.6059	2.15944
22.16	3.5479	0.833461	22.16	1.5009	2.34245
22.18	3.45471	0.771135	22.18	1.67122	2.37516
22.2	3.23641	0.64291	22.2	1.67315	2.2676
22.22	3.2047	0.816817	22.22	1.63822	2.59085
22.24	3.06	1.17323	22.24	1.69554	2.6054
22.26	3.15505	0.787966	22.26	1.50664	2.42759
22.28	3.11877	0.654623	22.28	1.53062	2.2217
22.3	3.20229	0.638394	22.3	1.49135	1.91769
22.32	3.05652	0.621503	22.32	1.57284	2.21342
22.34	2.9925	0.601532	22.34	1.77236	2.59648
22.36	3.03278	0.892081	22.36	1.7164	2.10798
22.38	2.82263	0.519373	22.38	1.74423	2.20704
22.4	2.9412	0.667474	22.4	1.74962	2.35659
22.42	2.89983	0.675886	22.42	1.7247	2.51485
22.44	2.88951	0.789599	22.44	1.78233	1.85449
22.46	2.78817	0.796384	22.46	1.69546	2.56807
22.48	2.87614	0.656379	22.48	1.60067	2.50364
22.5	2.99833	1.04505	22.5	1.64159	2.51971
22.52	3.14827	0.771982	22.52	1.58451	2.23622
22.54	3.20077	0.526471	22.54	1.6701	2.27486
22.56	3.32498	0.613737	22.56	1.60798	2.50177
22.58	3.33823	0.562177	22.58	1.6043	2.81729
22.6	3.17585	0.562013	22.6	1.52703	2.36453
22.62	3.07356	0.631272	22.62	1.62668	1.93917
22.64	3.00651	0.919767	22.64	1.54126	2.48767
22.66	3.01444	0.866203	22.66	1.51988	2.03622
22.68	2.97774	1.01405	22.68	1.61053	2.03823
22.7	2.79911	0.714108	22.7	1.6529	1.93909
22.72	2.74869	0.747915	22.72	1.5572	2.18119
22.74	3.09084	0.654286	22.74	1.59869	2.24991
22.76	2.92817	0.651386	22.76	1.55223	2.02741
22.78	2.78751	0.801771	22.78	1.57203	2.15485
22.8	2.83496	1.00724	22.8	1.70893	2.02758
22.82	2.75037	0.725761	22.82	1.58323	2.04727
22.84	2.71738	1.0281	22.84	1.58031	2.06866
22.86	2.90027	0.639035	22.86	1.46691	2.07685
22.88	2.8624	0.656347	22.88	1.57822	2.10077
22.9	2.70634	0.864158	22.9	1.55957	2.31091
22.92	2.59188	0.665725	22.92	1.62456	2.42514
22.94	2.56682	1.06014	22.94	1.66634	2.33877
22.96	2.34439	0.834691	22.96	1.7036	2.25152
22.98	2.43084	1.09516	22.98	1.64866	2.20389
23	2.47524	0.602751	23	1.60213	2.30279
23.02	2.55021	0.685384	23.02	1.59665	2.25043
23.04	2.64576	0.677695	23.04	1.5999	2.01503
23.06	2.79362	1.13744	23.06	1.69645	2.45653
23.08	2.78854	0.983687	23.08	1.64017	2.5129
23.1	2.67852	0.88308	23.1	1.46877	2.40444
23.12	2.56931	0.751644	23.12	1.66074	2.1062
23.14	2.6418	0.504774	23.14	1.62522	2.19673
23.16	2.69444	0.677673	23.16	1.69527	2.3598
23.18	2.60444	0.477096	23.18	1.69419	2.25444
23.2	2.59305	0.616414	23.2	1.67362	2.09119
23.22	2.58927	0.596515	23.22	1.76972	2.1554
23.24	2.61081	0.626572	23.24	1.63346	2.25767
23.26	2.82071	0.735612	23.26	1.62382	2.35057
23.28	2.97295	0.697215	23.28	1.63042	2.14914
23.3	2.97907	0.948546	23.3	1.65836	1.90084
23.32	2.95634	0.909091	23.32	1.65995	1.95604
23.34	2.97094	0.571706	23.34	1.59883	1.93899
23.36	3.09223	0.820551	23.36	1.63732	1.93957
23.38	3.10658	0.935025	23.38	1.66605	2.05396
23.4	3.19736	1.77383	23.4	1.83062	2.32557
23.42	3.07627	1.66048	23.42	1.7737	1.91284
23.44	3.14728	1.74921	23.44	1.75768	1.99897
23.46	3.2327	1.99214	23.46	1.57246	2.10369
23.48	3.39874	1.87377	23.48	1.65489	2.3907
23.5	3.61745	2.58641	23.5	1.56543	2.4285
23.52	3.62876	2.23772	23.52	1.7286	2.48558
23.54	3.63505	1.87532	23.54	1.77034	2.00639
23.56	3.83503	2.41449	23.56	1.89807	2.35661
23.58	3.66494	2.03207	23.58	1.73546	2.27716
23.6	3.44909	2.1125	23.6	1.70586	2.54213
23.62	3.41206	2.26615	23.62	1.58929	2.72346
23.64	3.5081	2.32244	23.64	1.62628	2.20159
23.66	3.50635	2.31315	23.66	1.62402	2.8302
23.68	3.42445	2.28621	23.68	1.59348	2.43611
23.7	3.45689	2.01111	23.7	1.58496	2.49036
23.72	3.46352	2.08627	23.72	1.59116	2.50227
23.74	3.41078	2.57385	23.74	1.61857	2.57823
23.76	3.45479	2.64005	23.76	1.50745	3.1525
23.78	3.41692	2.99599	23.78	1.49316	3.13014
23.8	3.27318	2.83368	23.8	1.57	3.282
23.82	3.35009	3.24816	23.82	1.57047	3.40427
23.84	3.41725	2.4602	23.84	1.53122	3.4956
23.86	3.4044	3.01123	23.86	1.5203	3.3237
23.88	3.56262	3.16925	23.88	1.58292	3.25975
23.9	3.60298	3.16547	23.9	1.65217	3.38623
23.92	3.61146	3.20595	23.92	1.68724	3.31924
23.94	3.58507	3.00143	23.94	1.66807	3.18601
23.96	3.41685	2.93967	23.96	1.63189	3.00035
23.98	3.54576	3.13381	23.98	1.53826	2.84516
24	3.37265	3.19117	24	1.67372	2.59928
24.02	3.38478	3.21207	24.02	1.69596	2.16678
24.04	3.21708	3.15263	24.04	1.69332	2.09066
24.06	3.30782	3.20744	24.06	1.71435	2.37575
24.08	3.47556	3.19111	24.08	1.7901	2.08463
24.1	3.43881	3.03638	24.1	1.82739	2.08771
24.12	3.41251	2.93967	24.12	1.71228	2.46358
24.14	3.3651	3.11508	24.14	1.85291	2.48228
24.16	3.37805	3.1903	24.16	1.6808	2.50443
24.18	3.42246	2.93087	24.18	1.71482	2.4913
24.2	3.47064	2.95963	24.2	1.69319	2.60254
24.22	3.42408	3.39808	24.22	1.65402	2.34312
24.24	3.45873	2.9427	24.24	1.67212	2.3091
24.26	3.35366	3.27988	24.26	1.62584	2.32774
24.28	3.40035	3.11892	24.28	1.57273	2.83513
24.3	3.48792	3.12437	24.3	1.66758	2.48779
24.32	3.32003	3.30467	24.32	1.55994	2.29319
24.34	3.39142	3.27383	24.34	1.65767	1.81458
24.36	3.35108	3.14355	24.36	1.83592	2.16823
24.38	3.29225	3.1865	24.38	1.70968	1.97473
24.4	3.22811	2.82468	24.4	1.74232	2.08512
24.42	3.18821	2.73593	24.42	1.69151	2.03036
24.44	3.1024	2.83882	24.44	1.61377	1.86118
24.46	3.17341	2.57271	24.46	1.72987	2.14815
24.48	3.0757	2.68716	24.48	1.72982	1.93101
24.5	3.05588	2.8397	24.5	1.65987	2.25459
24.52	2.92781	2.85958	24.52	1.62645	2.65763
24.54	3.05152	2.95136	24.54	1.73022	2.40365
24.56	3.16654	3.06638	24.56	1.66342	2.39738
24.58	3.27664	3.08632	24.58	1.65576	2.4384
24.6	3.23024	3.22222	24.6	1.5555	1.98407
24.62	3.05743	3.08711	24.62	1.54742	2.67558
24.64	3.15358	3.09362	24.64	1.61532	2.26424
24.66	3.17451	2.93932	24.66	1.6388	2.39329
24.68	3.32627	2.88224	24.68	1.59024	2.45128
24.7	3.26115	2.63933	24.7	1.56954	2.38696
24.72	3.31764	3.03381	24.72	1.59152	2.00465
24.74	3.41558	2.89154	24.74	1.48145	2.69707
24.76	3.48613	2.80385	24.76	1.57278	3.39796
24.78	3.40738	3.26296	24.78	1.58839	3.3937
24.8	3.34788	3.13405	24.8	1.56378	3.15462
24.82	3.14544	3.05387	24.82	1.46243	2.951
24.84	3.13466	3.04429	24.84	1.67625	2.61419
24.86	3.03832	2.96997	24.86	1.58247	2.78612
24.88	3.23976	3.08989	24.88	1.56597	2.91642
24.9	3.29235	3.13506	24.9	1.54696	3.09433
24.92	3.13716	2.96687	24.92	1.54229	3.05258
24.94	3.10932	3.09917	24.94	1.64493	2.65007
24.96	3.15442	2.98595	24.96	1.63589	3.06261
24.98	3.33636	2.9509	24.98	1.83644	2.68014
25	3.28776	3.10692	25	1.69019	2.77259
25.02	3.55411	3.16269	25.02	1.72242	2.96495
25.04	3.50273	3.23882	25.04	1.84944	2.98425
25.06	3.49641	2.84533	25.06	1.62303	2.93962
25.08	3.45072	3.04587	25.08	1.50047	2.97823
25.1	3.27545	3.11102	25.1	1.59758	2.87039
25.12	3.19587	3.11218	25.12	1.65536	2.95878
25.14	3.28132	3.19037	25.14	1.47708	2.47221
25.16	3.30622	3.41912	25.16	1.61084	2.78251
25.18	3.41597	3.29771	25.18	1.58976	2.79829
25.2	3.48747	3.12249	25.2	1.61301	2.90177
25.22	3.45201	3.54747	25.22	1.61404	2.82575
25.24	3.42198	3.23301	25.24	1.57607	2.82457
25.26	3.43777	2.87369	25.26	1.58391	3.00766
25.28	3.54807	3.15507	25.28	1.5316	2.88216
25.3	3.43125	3.19395	25.3	1.59423	2.90812
25.32	3.41798	3.42068	25.32	1.52165	2.79892
25.34	3.37319	3.45887	25.34	1.4917	2.66158
25.36	3.33016	3.1643	25.36	1.58972	2.7971
25.38	3.31715	3.14996	25.38	1.50708	2.96041
25.4	3.18972	3.11733	25.4	1.59097	2.8398
25.42	3.32355	3.25625	25.42	1.63691	2.68409
25.44	3.47	3.168	25.44	1.60332	2.75058
25.46	3.42355	3.03446	25.46	1.59774	2.63589
25.48	3.37455	3.19127	25.48	1.53102	2.76835
25.5	3.45699	3.17719	25.5	1.70286	2.78268
25.52	3.56161	3.17099	25.52	1.65131	3.67377
25.54	3.61056	3.07357	25.54	1.55582	3.56918
25.56	3.71328	3.11498	25.56	1.55193	3.22776
25.58	3.63304	3.1952	25.58	1.59997	3.41784
25.6	3.38242	3.12162	25.6	1.65675	3.4282
25.62	3.40535	2.98617	25.62	1.68006	3.19725
25.64	3.446	3.1321	25.64	1.64702	2.56446
25.66	3.4667	3.12328	25.66	1.58924	2.1849
25.68	3.419	3.17001	25.68	1.59927	2.00171
25.7	3.54177	3.14663	25.7	1.58318	2.63103
25.72	3.46974	3.59804	25.72	1.66726	3.21361
25.74	3.58136	3.28518	25.74	1.6798	2.82045
25.76	3.62425	3.30357	25.76	1.55925	2.79504
25.78	3.75648	3.31634	25.78	1.51283	2.13827
25.8	3.77755	3.22595	25.8	1.63353	2.27869
25.82	3.96874	3.1883	25.82	1.82129	2.29767
25.84	3.89792	3.18626	25.84	1.66702	2.59424
25.86	3.90309	3.08664	25.86	1.67947	2.65699
25.88	3.67105	3.19483	25.88	1.63098	2.89155
25.9	3.64563	3.24451	25.9	1.52188	3.11136
25.92	3.65592	3.15408	25.92	1.60927	3.24609
25.94	3.55199	3.29221	25.94	1.52027	3.24377
25.96	3.36844	3.41677	25.96	1.5903	1.89078
25.98	3.35236	3.45899	25.98	1.49644	2.2974
26	3.41496	3.60498	26	1.69112	2.41835
26.02	3.69847	3.15881	26.02	1.55071	2.58683
26.04	3.54683	2.87525	26.04	1.60316	2.63923
26.06	3.51464	2.72601	26.06	1.61344	2.9359
26.08	3.59437	2.69816	26.08	1.60956	3.12083
26.1	3.43552	3.02989	26.1	1.58766	3.05586
26.12	3.40372	3.17314	26.12	1.63594	2.72378
26.14	3.40409	2.81821	26.14	1.77076	3.07324
26.16	3.30844	2.64604	26.16	1.58583	3.13142
26.18	3.43328	2.80759	26.18	1.57261	3.02418
26.2	3.42707	2.69528	26.2	1.46435	2.91083
26.22	3.41479	2.50067	26.22	1.52112	2.79394
26.24	3.39243	2.4409	26.24	1.62387	3.02062
26.26	3.29294	2.49633	26.26	1.46145	3.01247
26.28	3.27262	2.8127	26.28	1.45979	3.31514
26.3	3.43922	2.41364	26.3	1.44549	3.54393
26.32	3.27836	2.58759	26.32	1.48284	3.19444
26.34	3.14853	2.56504	26.34	1.5638	3.01959
26.36	3.36161	2.52606	26.36	1.54783	3.03196
26.38	3.52791	2.66339	26.38	1.47863	2.82886
26.4	3.46903	2.32907	26.4	1.56008	3.18142
26.42	3.6496	2.41663	26.42	1.56131	3.16271
26.44	3.63274	2.52971	26.44	1.49183	3.18028
26.46	3.57888	2.59554	26.46	1.58874	3.14813
26.48	3.43286	2.6798	26.48	1.61981	3.34742
26.5	3.41145	2.87568	26.5	1.69684	2.80167
26.52	3.38056	2.47647	26.52	1.65137	3.14687
26.54	3.18344	2.57129	26.54	1.55956	3.18469
26.56	3.1357	2.84453	26.56	1.59629	3.06463
26.58	3.17572	2.55891	26.58	1.5691	2.6851
26.6	3.31192	2.54359	26.6	1.6342	3.12649
26.62	3.34314	2.36902	26.62	1.70957	3.25623
26.64	3.36246	2.83498	26.64	1.56891	2.91791
26.66	3.23989	2.44332	26.66	1.5512	3.28342
26.68	3.24666	2.45015	26.68	1.65746	3.08048
26.7	3.07441	2.40224	26.7	1.68277	3.27145
26.72	3.37372	2.72787	26.72	1.52612	2.96556
26.74	3.2003	2.52374	26.74	1.55954	3.04813
26.76	3.50268	2.71056	26.76	1.62872	3.1978
26.78	3.45683	2.60272	26.78	1.7029	2.93643
26.8	3.66234	2.72066	26.8	1.6144	3.03739
26.82	3.69334	2.63426	26.82	1.62274	3.3501
26.84	3.57259	3.08034	26.84	1.62584	3.27564
26.86	3.60527	3.04901	26.86	1.52245	3.29949
26.88	3.75212	2.81414	26.88	1.61279	3.16804
26.9	3.45426	2.94528	26.9	1.42364	2.68724
26.92	3.37133	2.6303	26.92	1.50967	2.83731
26.94	3.30939	2.52325	26.94	1.56788	3.06622
26.96	3.39857	2.58815	26.96	1.60142	3.23817
26.98	3.55697	2.20022	26.98	1.56067	3.04203
27	3.3549	2.7744	27	1.55729	2.72774
27.02	3.36771	2.27366	27.02	1.54666	2.8837
27.04	3.31903	2.6507	27.04	1.62622	3.39031
27.06	3.558	2.62409	27.06	1.65717	2.48944
27.08	3.43425	2.34848	27.08	1.64334	3.18691
27.1	3.21614	2.31379	27.1	1.62211	2.56793
27.12	3.47041	2.63428	27.12	1.60744	2.52327
27.14	3.54243	2.66063	27.14	1.51999	2.65068
27.16	3.43397	2.24851	27.16	1.61361	3.12689
27.18	3.58692	2.4888	27.18	1.61374	2.81535
27.2	3.66774	2.54835	27.2	1.69501	2.94115
27.22	3.65123	2.30007	27.22	1.6467	3.02571
27.24	3.45868	2.51673	27.24	1.63338	2.85102
27.26	3.3616	2.89398	27.26	1.60703	2.91518
27.28	3.40682	2.88489	27.28	1.67594	2.6216
27.3	3.51444	2.59356	27.3	1.68159	2.50832
27.32	3.54158	2.78901	27.32	1.64083	3.00692
27.34	3.61441	2.86707	27.34	1.68428	3.01555
27.36	3.67457	2.28546	27.36	1.72748	2.94301
27.38	3.65094	2.35205	27.38	1.57528	2.79314
27.4	3.74998	2.57265	27.4	1.68679	2.87326
27.42	3.52863	2.98947	27.42	1.71342	2.88444
27.44	3.59038	2.72981	27.44	1.8175	2.60511
27.46	3.59877	2.19003	27.46	1.69301	2.69104
27.48	3.55967	2.16562	27.48	1.90714	2.24163
27.5	3.62852	2.26411	27.5	1.63801	2.76684
27.52	3.56928	2.20011	27.52	1.71508	2.64635
27.54	3.48381	2.38817	27.54	1.65996	2.67534
27.56	3.60609	2.82319	27.56	1.71741	2.79729
27.58	3.36023	3.22638	27.58	1.7696	2.85131
27.6	3.40867	3.17279	27.6	1.75857	2.78723
27.62	3.34522	3.08268	27.62	1.80346	2.62081
27.64	3.40523	3.3157	27.64	1.66228	3.06153
27.66	3.31802	3.32974	27.66	1.58192	2.56902
27.68	3.46597	3.43793	27.68	1.64074	2.72682
27.7	3.46283	3.45647	27.7	1.56583	2.66011
27.72	3.42013	3.37972	27.72	1.81162	2.86251
27.74	3.36259	2.81176	27.74	1.71474	3.01745
27.76	3.35092	2.54607	27.76	1.66976	2.67333
27.78	3.29008	2.52699	27.78	1.58433	2.44874
27.8	3.2592	3.45201	27.8	1.63655	2.70829
27.82	3.32598	3.31453	27.82	1.60517	2.88678
27.84	3.32147	3.61599	27.84	1.66926	3.00361
27.86	3.40286	3.16724	27.86	1.61009	2.61758
27.88	3.39095	3.78198	27.88	1.542	2.84352
27.9	3.43229	3.67658	27.9	1.50485	3.36941
27.92	3.34089	3.35221	27.92	1.59144	2.93701
27.94	3.37079	3.4151	27.94	1.5879	2.57816
27.96	3.30383	3.65379	27.96	1.70847	2.80949
27.98	3.23115	4.05568	27.98	1.61456	3.10262
28	3.19028	3.80825	28	1.66791	2.70138
28.02	3.35029	3.28572	28.02	1.78503	3.19169
28.04	3.2899	2.77573	28.04	1.69154	2.61664
28.06	3.20506	3.16289	28.06	1.54809	2.56352
28.08	3.08527	2.55361	28.08	1.66686	2.51727
28.1	2.91651	3.12261	28.1	1.71958	2.39628
28.12	3.0438	3.86615	28.12	1.6361	2.46857
28.14	3.09865	3.6429	28.14	1.76756	2.69754
28.16	3.18789	3.245	28.16	1.76853	2.81161
28.18	3.33435	3.06127	28.18	1.74642	2.74237
28.2	3.30092	3.29397	28.2	1.74132	2.64368
28.22	3.23156	2.66381	28.22	1.64281	2.83948
28.24	3.34443	2.82312	28.24	1.56839	2.64846
28.26	3.21242	2.62495	28.26	1.65881	2.70119
28.28	3.30988	3.02614	28.28	1.64969	2.42213
28.3	3.15672	3.17374	28.3	1.73699	2.63834
28.32	3.20046	2.68003	28.32	1.77178	2.7368
28.34	3.15139	2.51752	28.34	1.70954	2.66257
28.36	3.08107	2.33367	28.36	1.66981	2.70325
28.38	3.28079	2.33218	28.38	1.68576	2.74996
28.4	3.32137	3.10646	28.4	1.70184	2.60791
28.42	3.16657	2.97451	28.42	1.76253	2.94302
28.44	3.15044	2.86544	28.44	1.69814	3.11077
28.46	3.20699	2.85811	28.46	1.7472	2.8417
28.48	3.21044	2.87789	28.48	1.71341	2.76484
28.5	3.13583	2.55784	28.5	1.59215	2.76742
28.52	3.05912	2.75743	28.52	1.5985	2.96649
28.54	3.14651	2.2534	28.54	1.53671	2.85729
28.56	3.00935	2.37008	28.56	1.60344	2.85519
28.58	3.13664	2.54862	28.58	1.59604	2.49532
28.6	3.16653	2.3506	28.6	1.55065	2.75246
28.62	3.1707	2.38669	28.62	1.63857	2.5557
28.64	3.23369	2.74671	28.64	1.78047	2.72133
28.66	3.18155	2.86381	28.66	1.78015	2.88085
28.68	3.11305	3.12339	28.68	1.70614	3.04375
28.7	3.21373	3.06005	28.7	1.60064	3.2768
28.72	3.0954	2.63254	28.72	1.64565	2.88488
28.74	3.0932	3.1618	28.74	1.58156	2.9932
28.76	3.21011	2.80373	28.76	1.65842	3.4211
28.78	3.26331	2.60214	28.78	1.62224	3.03427
28.8	3.2821	2.72015	28.8	1.69565	2.68065
28.82	3.21807	2.98955	28.82	1.60307	2.90335
28.84	3.12603	2.68518	28.84	1.60597	3.04461
28.86	3.19459	2.66148	28.86	1.53676	3.46159
28.88	3.15853	2.58276	28.88	1.58993	3.12304
28.9	3.17699	2.58239	28.9	1.62059	3.45264
28.92	3.10782	2.32611	28.92	1.65833	3.4899
28.94	2.97956	2.47488	28.94	1.56656	3.36515
28.96	3.12432	2.56852	28.96	1.5526	3.34126
28.98	3.11122	2.64975	28.98	1.65377	3.45158
29	3.2124	2.47639	29	1.49353	3.42304
29.02	3.16997	3.34298	29.02	1.70278	3.39744
29.04	3.24101	3.37249	29.04	1.61143	2.79076
29.06	3.16975	2.85157	29.06	1.67185	2.64428
29.08	3.3128	3.46845	29.08	1.65698	2.52494
29.1	3.44004	3.5319	29.1	1.58232	2.50834
29.12	3.30185	2.85564	29.12	1.53833	2.9105
29.14	3.46878	3.21788	29.14	1.62006	2.75602
29.16	3.35676	2.78946	29.16	1.6476	2.63783
29.18	3.34483	3.03763	29.18	1.54183	2.63121
29.2	3.37341	3.28832	29.2	1.53115	2.7883
29.22	3.47934	3.27949	29.22	1.67098	2.97114
29.24	3.56075	3.28925	29.24	1.70782	2.68013
29.26	3.51011	2.79295	29.26	1.7004	3.03084
29.28	3.3701	2.96075	29.28	1.62608	3.1138
29.3	3.5896	2.84071	29.3	1.70753	3.10803
29.32	3.46401	2.85063	29.32	1.61684	3.03205
29.34	3.33249	2.77611	29.34	1.59319	3.15819
29.36	3.3175	2.69604	29.36	1.54016	3.094
29.38	3.36838	2.8254	29.38	1.66077	2.72487
29.4	3.47362	3.37119	29.4	1.6575	2.88209
29.42	3.56947	3.01408	29.42	1.63782	3.04016
29.44	3.32728	2.78591	29.44	1.62981	3.11004
29.46	3.36459	2.48093	29.46	1.62806	3.206
29.48	3.11895	2.7094	29.48	1.57971	3.09381
29.5	3.3125	2.58777	29.5	1.64997	2.78899
29.52	3.1616	2.75022	29.52	1.58946	2.8987
29.54	3.21402	2.44781	29.54	1.62184	2.91498
29.56	3.35712	2.65719	29.56	1.61469	2.86999
29.58	3.36553	2.67275	29.58	1.59864	3.06683
29.6	3.47087	2.87784	29.6	1.48114	3.31429
29.62	3.69302	2.66569	29.62	1.54209	2.83382
29.64	3.55374	2.49616	29.64	1.79148	2.98419
29.66	3.50768	2.36406	29.66	1.61782	2.92153
29.68	3.33741	2.65461	29.68	1.6263	2.93564
29.7	3.40009	2.28019	29.7	1.61901	2.7039
29.72	3.3543	2.94751	29.72	1.59928	2.9281
29.74	3.31035	2.54783	29.74	1.54981	3.09373
29.76	3.33948	3.00492	29.76	1.64804	2.81731
29.78	3.29764	3.36681	29.78	1.54421	3.07627
29.8	3.35861	3.55471	29.8	1.61275	2.85129
29.82	3.21311	2.82085	29.82	1.72233	2.85015
29.84	3.29226	3.21628	29.84	1.78057	2.84194
29.86	3.13324	2.81996	29.86	1.77768	2.91677
29.88	3.26896	3.2523	29.88	1.74869	2.96987
29.9	3.34843	2.76608	29.9	1.715	2.99097
29.92	3.36174	2.57427	29.92	1.80433	2.81552
29.94	3.23882	3.23687	29.94	1.74159	2.89071
29.96	3.23485	3.08173	29.96	1.59927	2.80385
29.98	3.10736	3.53346	29.98	1.77775	3.16784
30	3.03477	3.69187	30	1.74768	2.92174
30.02	2.87779	3.87492	30.02	1.78594	2.94758
30.04	3.14673	4.09583	30.04	1.79677	2.77329
30.06	3.15383	3.77385	30.06	1.81765	2.83112
30.08	3.08554	3.40247	30.08	1.80242	2.34602
30.1	3.13152	3.2404	30.1	1.74593	2.66653
30.12	3.18127	3.59817	30.12	1.76398	2.68802
30.14	3.27145	3.63555	30.14	1.83776	2.75959
30.16	3.23032	3.44707	30.16	1.8783	2.60019
30.18	3.15884	3.21951	30.18	1.82879	2.61887
30.2	3.26303	4.07251	30.2	1.79942	2.32843
30.22	3.19305	3.52435	30.22	1.61788	2.59279
30.24	3.30919	3.07733	30.24	1.65737	2.43214
30.26	3.32643	2.90946	30.26	1.76841	2.85828
30.28	3.31224	3.44804	30.28	1.64273	2.75247
30.3	3.31796	3.38296	30.3	1.58488	2.39685
30.32	3.35296	3.47783	30.32	1.63576	3.06939
30.34	3.36824	3.14604	30.34	1.6084	2.92303
30.36	3.40053	3.05107	30.36	1.52175	2.86008
30.38	3.43995	2.21534	30.38	1.7281	2.81454
30.4	3.60721	2.28599	30.4	1.72687	3.04189
30.42	3.5758	2.59527	30.42	1.54196	2.54079
30.44	3.49623	2.86297	30.44	1.60305	2.48043
30.46	3.7453	3.4098	30.46	1.73508	2.59052
30.48	3.80679	3.43924	30.48	1.64695	2.85872
30.5	3.77866	3.25199	30.5	1.66502	2.63743
30.52	3.87832	3.50818	30.52	1.62421	2.78717
30.54	3.92597	3.68046	30.54	1.63849	2.45644
30.56	3.85828	3.82495	30.56	1.69776	2.6643
30.58	3.68755	4.12474	30.58	1.53406	2.60396
30.6	3.87188	4.15849	30.6	1.57055	2.41432
30.62	3.79953	3.95384	30.62	1.57651	2.33455
30.64	3.91848	4.08511	30.64	1.5734	2.64461
30.66	3.83924	4.1371	30.66	1.63398	2.60455
30.68	3.97739	4.14472	30.68	1.62319	2.23032
30.7	4.07155	4.08083	30.7	1.60478	2.3224
30.72	3.94541	4.10833	30.72	1.56491	2.73167
30.74	3.99439	4.01719	30.74	1.60203	2.45382
30.76	3.97517	3.90808	30.76	1.52344	2.77967
30.78	3.84298	3.49387	30.78	1.5993	2.51996
30.8	3.99182	4.00457	30.8	1.56071	2.58101
30.82	3.94743	3.31141	30.82	1.64665	2.61594
30.84	3.82984	3.82184	30.84	1.65808	2.62744
30.86	3.67087	3.91135	30.86	1.5987	2.78749
30.88	3.67627	3.48368	30.88	1.71722	2.769
30.9	3.64295	3.25942	30.9	1.73493	2.77527
30.92	3.77183	3.07828	30.92	1.52904	3.15065
30.94	3.79708	3.65738	30.94	1.54743	3.59064
30.96	3.8045	3.61211	30.96	1.62962	3.45743
30.98	3.81831	3.34487	30.98	1.67624	3.40875
31	3.73557	3.57756	31	1.60883	3.10781
31.02	3.86333	3.42034	31.02	1.64394	2.92751
31.04	3.81941	3.00326	31.04	1.60375	2.74656
31.06	3.76488	3.64925	31.06	1.65672	2.81783
31.08	3.77925	3.81997	31.08	1.661	2.97168
31.1	3.78893	3.43391	31.1	1.73957	3.0981
31.12	3.77507	3.36976	31.12	1.73206	3.05083
31.14	3.87534	3.27146	31.14	1.59349	2.46022
31.16	3.81579	3.1281	31.16	1.75657	2.91575
31.18	3.73072	3.13144	31.18	1.63271	2.96962
31.2	3.80766	3.43299	31.2	1.75356	3.00963
31.22	3.70683	3.08029	31.22	1.79287	3.19624
31.24	3.72888	3.50766	31.24	1.76228	2.98329
31.26	3.76246	3.16633	31.26	1.69634	2.99509
31.28	3.63619	3.21512	31.28	1.68426	2.85481
31.3	3.89482	3.75118	31.3	1.67017	2.98553
31.32	3.97469	3.5669	31.32	1.72988	3.1571
31.34	4.07764	3.83454	31.34	1.77628	2.85404
31.36	4.10686	3.77543	31.36	1.84889	3.57076
31.38	3.86204	3.84721	31.38	1.85442	3.37008
31.4	3.98162	3.57737	31.4	1.81824	3.48832
31.42	3.81157	3.72401	31.42	1.7401	3.18853
31.44	3.79612	3.73655	31.44	1.79121	3.60149
31.46	3.74615	3.66571	31.46	1.7832	3.06665
31.48	3.75816	4.11451	31.48	1.79931	3.26433
31.5	3.81527	3.86246	31.5	1.69032	3.18248
31.52	3.94173	4.08447	31.52	1.58518	2.9722
31.54	3.76381	3.85137	31.54	1.54276	3.14287
31.56	3.72408	3.37644	31.56	1.6453	3.12605
31.58	3.74578	3.39368	31.58	1.63424	3.06939
31.6	3.69956	3.24897	31.6	1.69001	3.17477
31.62	3.65147	3.43712	31.62	1.58202	2.99916
31.64	3.74841	3.62462	31.64	1.53497	3.535
31.66	3.78099	3.64286	31.66	1.61506	3.48884
31.68	3.64868	3.38871	31.68	1.50684	3.47021
31.7	3.71291	3.7516	31.7	1.53001	3.55907
31.72	3.8367	3.82082	31.72	1.63105	3.44949
31.74	3.63964	3.42639	31.74	1.65719	3.06325
31.76	3.71773	2.95214	31.76	1.7624	3.08122
31.78	3.5541	3.34734	31.78	1.57704	3.23861
31.8	3.6939	3.3674	31.8	1.62361	3.46314
31.82	3.85228	2.82479	31.82	1.59103	3.50468
31.84	3.80273	3.53569	31.84	1.58236	3.20135
31.86	3.70265	3.78229	31.86	1.57968	3.22388
31.88	3.77633	3.71981	31.88	1.5676	3.45285
31.9	3.82427	3.92184	31.9	1.66739	3.44372
31.92	3.73329	3.71861	31.92	1.53161	3.39489
31.94	3.75996	3.76046	31.94	1.67382	3.45586
31.96	3.72946	3.32754	31.96	1.51643	3.57314
31.98	3.68035	3.94376	31.98	1.47601	3.58841
32	3.69448	3.89197	32	1.46086	3.52277
32.02	3.64496	3.79953	32.02	1.4636	3.52971
32.04	3.6476	3.88958	32.04	1.42741	2.98813
32.06	3.67035	3.65586	32.06	1.60269	3.08844
32.08	3.69677	4.0121	32.08	1.48158	3.18704
32.1	3.76656	3.95011	32.1	1.51701	3.05147
32.12	3.62181	3.78971	32.12	1.61156	3.2027
32.14	3.68791	4.09692	32.14	1.6033	2.95355
32.16	3.55422	4.13357	32.16	1.5185	2.2467
32.18	3.66777	3.89745	32.18	1.64664	2.10311
32.2	3.60785	3.65729	32.2	1.53666	2.33741
32.22	3.66578	3.69065	32.22	1.51169	2.07032
32.24	3.69591	3.95803	32.24	1.37426	2.7477
32.26	3.53912	3.9308	32.26	1.41697	2.932
32.28	3.45206	3.89633	32.28	1.5011	2.97362
32.3	3.46263	3.93442	32.3	1.43806	3.31756
32.32	3.41614	3.90861	32.32	1.48397	3.14585
32.34	3.47248	3.79521	32.34	1.47789	3.04178
32.36	3.45476	3.79555	32.36	1.47774	3.34252
32.38	3.46438	3.86821	32.38	1.46482	3.16944
32.4	3.64429	4.03232	32.4	1.49151	2.94922
32.42	3.63181	2.98277	32.42	1.41925	2.98264
32.44	3.65477	2.55564	32.44	1.44249	3.10354
32.46	3.53628	2.78371	32.46	1.45636	3.64465
32.48	3.61222	2.80357	32.48	1.63712	3.48426
32.5	3.63817	3.57159	32.5	1.61303	3.14365
32.52	3.49938	3.70163	32.52	1.51821	3.48678
32.54	3.53043	3.57558	32.54	1.67621	3.55765
32.56	3.48272	3.78632	32.56	1.54293	3.25647
32.58	3.51912	3.86713	32.58	1.54717	3.42017
32.6	3.58621	3.78236	32.6	1.53821	3.56899
32.62	3.5659	4.11331	32.62	1.4797	3.41104
32.64	3.54122	3.79133	32.64	1.63661	3.36537
32.66	3.5096	3.77327	32.66	1.58369	3.23111
32.68	3.70382	3.54315	32.68	1.69172	3.32276
32.7	3.68871	3.87817	32.7	1.60571	3.47139
32.72	3.63702	3.79067	32.72	1.56962	3.44188
32.74	3.5622	3.82812	32.74	1.68545	3.49615
32.76	3.74081	3.95463	32.76	1.54627	3.49154
32.78	3.57046	4.1282	32.78	1.60633	3.61439
32.8	3.43658	3.92299	32.8	1.60931	3.58981
32.82	3.50291	3.8492	32.82	1.60565	3.52445
32.84	3.4943	3.86734	32.84	1.61176	3.09701
32.86	3.5963	4.05217	32.86	1.56707	3.47803
32.88	3.6488	4.23314	32.88	1.59453	3.39022
32.9	3.71404	3.94391	32.9	1.66568	2.54766
32.92	3.77742	3.88182	32.92	1.63763	2.51724
32.94	3.60114	3.9842	32.94	1.59327	3.46977
32.96	3.5062	3.13343	32.96	1.53536	3.43922
32.98	3.51458	3.5531	32.98	1.61776	3.52093
33	3.62583	3.39577	33	1.51634	3.56937
33.02	3.63755	3.46397	33.02	1.49772	3.65692
33.04	3.57462	3.68527	33.04	1.65775	3.63122
33.06	3.48182	3.79971	33.06	1.66585	3.62601
33.08	3.5695	3.73553	33.08	1.62144	3.48405
33.1	3.45074	3.65207	33.1	1.62196	3.54729
33.12	3.46242	4.13886	33.12	1.53881	3.56167
33.14	3.41169	3.64744	33.14	1.63928	3.34721
33.16	3.43138	3.37117	33.16	1.66417	3.43991
33.18	3.52388	3.96026	33.18	1.63713	3.38758
33.2	3.5632	3.45622	33.2	1.55689	3.4912
33.22	3.61379	3.40748	33.22	1.73352	3.441
33.24	3.50587	3.72514	33.24	1.65361	3.46104
33.26	3.62974	3.72795	33.26	1.63602	3.49299
33.28	3.62867	3.69797	33.28	1.67114	3.22649
33.3	3.51904	3.80862	33.3	1.60525	3.30276
33.32	3.46159	3.7217	33.32	1.7723	3.48918
33.34	3.51744	3.86456	33.34	1.81515	3.49632
33.36	3.57819	3.89055	33.36	1.64078	3.65153
33.38	3.65695	3.91902	33.38	1.58137	3.14957
33.4	3.59381	3.96232	33.4	1.44261	3.402
33.42	3.71201	4.04754	33.42	1.44526	3.4759
33.44	3.64459	4.07296	33.44	1.48872	3.48791
33.46	3.61817	4.0966	33.46	1.49946	3.57429
33.48	3.78368	4.13161	33.48	1.46598	3.49303
33.5	3.83458	3.15268	33.5	1.50884	3.47793
33.52	3.57308	3.30977	33.52	1.51599	3.56362
33.54	3.77696	3.28256	33.54	1.52436	3.46185
33.56	3.71974	2.85537	33.56	1.3359	3.41264
33.58	3.72552	3.19339	33.58	1.43477	3.46655
33.6	3.60533	2.99526	33.6	1.54325	3.37014
33.62	3.60414	3.34752	33.62	1.44605	3.52864
33.64	3.70972	2.98295	33.64	1.37287	3.47143
33.66	3.61737	3.07868	33.66	1.48807	3.4786
33.68	3.56448	3.41546	33.68	1.4288	3.41254
33.7	3.67268	3.02667	33.7	1.48181	3.39056
33.72	3.69834	3.03386	33.72	1.51592	3.62478
33.74	3.61178	3.23734	33.74	1.506	3.4961
33.76	3.50891	2.88334	33.76	1.64614	3.47746
33.78	3.77364	3.03145	33.78	1.62958	3.13694
33.8	3.69726	2.95748	33.8	1.49216	3.4757
33.82	3.66023	3.05986	33.82	1.44572	3.41469
33.84	3.456	3.07522	33.84	1.56455	3.35177
33.86	3.59775	3.11827	33.86	1.53729	3.32167
33.88	3.64557	2.82697	33.88	1.53916	2.98817
33.9	3.47151	2.86442	33.9	1.53349	3.35299
33.92	3.59491	3.10681	33.92	1.57064	2.9039
33.94	3.49106	3.12599	33.94	1.54222	2.8788
33.96	3.57987	3.08102	33.96	1.5533	2.67733
33.98	3.73057	2.80508	33.98	1.48635	2.97998
34	3.58054	2.64808	34	1.58254	2.82371
34.02	3.62084	2.47655	34.02	1.67902	2.57908
34.04	3.62365	2.90194	34.04	1.50747	2.90366
34.06	3.82485	2.76348	34.06	1.55664	3.00007
34.08	3.73904	3.02808	34.08	1.5129	3.01226
34.1	3.49298	2.92271	34.1	1.58424	2.99761
34.12	3.61265	3.42866	34.12	1.57227	2.9823
34.14	3.69134	3.42178	34.14	1.54046	2.57987
34.16	3.63258	3.12389	34.16	1.64676	2.77898
34.18	3.60317	3.35221	34.18	1.49638	2.72874
34.2	3.76295	3.33802	34.2	1.53036	2.90193
34.22	3.65499	2.9101	34.22	1.54686	2.68615
34.24	3.5539	2.89073	34.24	1.61767	3.26405
34.26	3.58592	2.67432	34.26	1.43961	3.41606
34.28	3.5455	2.57194	34.28	1.60903	2.85756
34.3	3.53789	2.62834	34.3	1.51435	3.2884
34.32	3.60347	2.58105	34.32	1.52486	3.49738
34.34	3.52666	3.23911	34.34	1.44727	3.13194
34.36	3.60939	3.04948	34.36	1.49548	3.63111
34.38	3.56023	2.64492	34.38	1.54366	3.26984
34.4	3.42287	2.375	34.4	1.55568	3.32569
34.42	3.60042	2.77323	34.42	1.43568	3.34647
34.44	3.51704	2.41646	34.44	1.50514	3.34501
34.46	3.62159	2.53033	34.46	1.59174	2.95573
34.48	3.51128	2.3436	34.48	1.55813	2.82694
34.5	3.64549	2.62807	34.5	1.51712	2.75478
34.52	3.75011	2.80118	34.52	1.61163	2.71716
34.54	3.65834	2.56445	34.54	1.62801	2.4452
34.56	3.58851	2.48751	34.56	1.66017	2.72432
34.58	3.70836	2.41547	34.58	1.60093	2.72071
34.6	3.74357	2.36209	34.6	1.57297	2.42013
34.62	3.69308	2.25355	34.62	1.55289	2.57655
34.64	3.68718	2.61817	34.64	1.59856	2.45163
34.66	3.48892	2.41903	34.66	1.60234	2.6327
34.68	3.77076	2.30037	34.68	1.57915	2.29744
34.7	3.66317	2.32384	34.7	1.60105	2.56085
34.72	3.50168	2.56379	34.72	1.5308	2.55315
34.74	3.6444	2.38642	34.74	1.60469	2.51404
34.76	3.53743	2.43781	34.76	1.58055	2.44884
34.78	3.59949	2.33146	34.78	1.55742	2.63175
34.8	3.60319	2.37847	34.8	1.53526	2.43505
34.82	3.54039	2.39386	34.82	1.57835	2.62693
34.84	3.59722	2.63915	34.84	1.66095	2.63364
34.86	3.56603	2.62505	34.86	1.56403	2.67123
34.88	3.72643	2.45732	34.88	1.55318	2.68985
34.9	3.6784	2.52279	34.9	1.50239	2.53842
34.92	3.64672	2.54108	34.92	1.73431	2.73676
34.94	3.69235	2.47584	34.94	1.72706	2.30626
34.96	3.54159	2.68081	34.96	1.69436	2.27616
34.98	3.49957	2.91352	34.98	1.67783	2.67835
35	3.43204	2.81416	35	1.69984	2.68808
35.02	3.49456	2.56302	35.02	1.65401	2.84162
35.04	3.40551	2.34955	35.04	1.68822	2.73278
35.06	3.37267	2.36567	35.06	1.63578	3.25586
35.08	3.45653	2.37359	35.08	1.58456	3.30861
35.1	3.43609	2.39204	35.1	1.60729	3.39249
35.12	3.41612	2.41357	35.12	1.57158	3.38182
35.14	3.5787	2.44348	35.14	1.53923	3.4757
35.16	3.58996	2.5229	35.16	1.48726	3.42907
35.18	3.45028	2.58794	35.18	1.598	3.25419
35.2	3.53772	2.49273	35.2	1.74107	2.65651
35.22	3.58029	2.57617	35.22	1.66434	3.08719
35.24	3.71519	2.5474	35.24	1.61438	3.11434
35.26	3.61353	2.70087	35.26	1.70774	3.50901
35.28	3.69574	2.74529	35.28	1.78622	3.33904
35.3	3.52481	2.87198	35.3	1.75749	3.54795
35.32	3.46614	2.73485	35.32	1.81279	2.81819
35.34	3.56714	2.48593	35.34	1.70519	2.56675
35.36	3.67843	2.44853	35.36	1.60278	2.82024
35.38	3.61994	2.51352	35.38	1.63084	2.59388
35.4	3.53164	2.66837	35.4	1.81757	2.56135
35.42	3.61972	2.50237	35.42	1.81408	2.73847
35.44	3.60432	2.54708	35.44	1.67828	2.55275
35.46	3.62917	2.65613	35.46	1.73747	2.3275
35.48	3.69241	2.8013	35.48	1.56417	2.63058
35.5	3.66172	2.82994	35.5	1.68279	2.64781
35.52	3.79144	2.46876	35.52	1.75561	2.35598
35.54	3.62838	3.02926	35.54	1.64688	2.22259
35.56	3.74828	3.35865	35.56	1.64565	2.83454
35.58	3.80549	3.28364	35.58	1.67928	2.48748
35.6	3.70583	3.60328	35.6	1.67944	2.53661
35.62	3.71645	3.61763	35.62	1.7032	2.88115
35.64	3.62906	3.47859	35.64	1.67525	2.47692
35.66	3.53254	3.62797	35.66	1.71245	2.29597
35.68	3.64136	3.90765	35.68	1.66911	2.60108
35.7	3.61747	3.79303	35.7	1.72756	2.45808
35.72	3.51952	3.7056	35.72	1.5781	2.80394
35.74	3.53776	4.12015	35.74	1.59811	2.91342
35.76	3.53604	4.05821	35.76	1.60232	2.51531
35.78	3.4804	3.7452	35.78	1.61347	2.63503
35.8	3.33369	3.32383	35.8	1.68533	3.13327
35.82	3.28164	3.57076	35.82	1.62058	3.36164
35.84	3.45122	3.91637	35.84	1.66195	2.83825
35.86	3.18999	2.88427	35.86	1.6716	2.94234
35.88	3.30389	2.48864	35.88	1.80154	2.58707
35.9	3.60059	2.70831	35.9	1.72035	2.0524
35.92	3.56058	2.33259	35.92	1.78871	1.99808
35.94	3.55441	2.8858	35.94	1.73851	1.929
35.96	3.59729	3.12494	35.96	1.65566	1.68227
35.98	3.55856	2.5956	35.98	1.75762	2.77394
36	3.31153	2.5042	36	1.73808	2.78837
36.02	3.40609	2.35574	36.02	1.77687	2.67326
36.04	3.46372	2.73616	36.04	1.82621	2.83647
36.06	3.49653	2.71327	36.06	1.82932	2.8441
36.08	3.60318	2.9749	36.08	1.68746	2.58284
36.1	3.53941	3.0238	36.1	1.65761	2.49977
36.12	3.37567	3.53232	36.12	1.609	2.24489
36.14	3.47136	3.46699	36.14	1.66603	2.70245
36.16	3.5817	3.78639	36.16	1.56309	2.6468
36.18	3.74116	4.04332	36.18	1.6194	2.47252
36.2	3.41087	3.77654	36.2	1.66526	2.6764
36.22	3.39073	3.86669	36.22	1.60298	2.58709
36.24	3.50323	3.98629	36.24	1.6371	2.43825
36.26	3.33987	3.77662	36.26	1.60585	2.32812
36.28	3.34386	3.58897	36.28	1.72542	2.45783
36.3	3.30991	4.10437	36.3	1.59792	2.69191
36.32	3.45812	3.72888	36.32	1.67908	2.63955
36.34	3.70204	3.9564	36.34	1.6798	2.59082
36.36	3.62294	3.62805	36.36	1.69833	2.88302
36.38	3.5695	3.5458	36.38	1.78532	2.55671
36.4	3.58781	3.46694	36.4	1.61361	2.89481
36.42	3.65271	3.21267	36.42	1.72845	2.66018
36.44	3.53703	3.10104	36.44	1.63315	2.53637
36.46	3.58221	3.01711	36.46	1.72811	2.68833
36.48	3.56461	3.35816	36.48	1.83099	2.69868
36.5	3.77652	3.29814	36.5	1.70499	2.85595
36.52	3.72356	3.76043	36.52	1.74046	2.34577
36.54	3.85377	3.78978	36.54	1.76107	2.64839
36.56	3.86743	3.77045	36.56	1.67852	2.42461
36.58	3.68808	3.7964	36.58	1.75777	2.76375
36.6	3.57507	3.55357	36.6	1.81484	2.52711
36.62	3.71572	3.35883	36.62	1.73644	2.48821
36.64	3.562	3.054	36.64	1.82794	2.41557
36.66	3.54042	3.00277	36.66	1.84976	2.57474
36.68	3.47795	3.063	36.68	1.73947	2.55447
36.7	3.63946	3.09797	36.7	1.7222	2.79803
36.72	3.72861	2.53921	36.72	1.69981	2.74856
36.74	3.86705	3.33416	36.74	1.76892	2.68303
36.76	3.79442	3.90979	36.76	1.72198	2.43327
36.78	3.67157	3.43626	36.78	1.67922	2.5909
36.8	3.47898	2.86184	36.8	1.62008	2.7632
36.82	3.56241	3.16125	36.82	1.62631	2.58064
36.84	3.5399	3.29092	36.84	1.64302	2.62898
36.86	3.51203	3.13192	36.86	1.51979	2.48113
36.88	3.56495	3.94753	36.88	1.6031	2.85589
36.9	3.64126	3.22024	36.9	1.69442	2.79598
36.92	3.67091	2.61368	36.92	1.69326	2.52552
36.94	3.58838	2.42392	36.94	1.59192	2.54424
36.96	3.39405	2.18254	36.96	1.6633	2.41964
36.98	3.49787	2.28137	36.98	1.72901	2.27746
37	3.51308	1.94616	37	1.57539	2.42179
37.02	3.65264	1.94835	37.02	1.59428	2.39127
37.04	3.74645	2.14794	37.04	1.62407	2.46491
37.06	3.75441	2.15376	37.06	1.58735	2.71802
37.08	3.51007	2.25539	37.08	1.60876	2.44792
37.1	3.59503	2.04448	37.1	1.66884	2.54284
37.12	3.58612	2.07172	37.12	1.67277	2.53503
37.14	3.62547	1.9109	37.14	1.68434	2.63631
37.16	3.63262	1.89072	37.16	1.61965	2.6635
37.18	3.66821	2.07228	37.18	1.59434	2.35945
37.2	3.68028	2.23573	37.2	1.54622	2.24901
37.22	3.5671	2.12238	37.22	1.55596	2.50873
37.24	3.56961	2.15982	37.24	1.62029	2.3215
37.26	3.51898	2.09524	37.26	1.58275	2.45976
37.28	3.70495	2.21207	37.28	1.53465	2.32567
37.3	3.434	2.43452	37.3	1.4747	2.56655
37.32	3.81679	2.15652	37.32	1.57754	2.58243
37.34	3.62485	2.08452	37.34	1.61569	2.5115
37.36	3.76553	2.53072	37.36	1.65098	2.43874
37.38	3.55301	3.26802	37.38	1.58478	2.47504
37.4	3.62064	3.5905	37.4	1.62524	2.25285
37.42	3.65216	3.6958	37.42	1.58571	2.46954
37.44	3.68083	3.55745	37.44	1.61315	2.32945
37.46	3.68388	3.54997	37.46	1.4794	2.28164
37.48	3.87528	3.53702	37.48	1.60702	2.61684
37.5	3.88758	3.29255	37.5	1.64116	2.66596
37.52	3.84077	3.24444	37.52	1.71588	2.28826
37.54	3.62803	3.27429	37.54	1.74254	2.33454
37.56	3.56708	3.20296	37.56	1.66948	2.55983
37.58	3.53486	3.14966	37.58	1.70742	2.36508
37.6	3.5293	3.2212	37.6	1.48281	2.26512
37.62	3.43114	3.09726	37.62	1.49974	2.49641
37.64	3.48305	3.20849	37.64	1.53324	2.48262
37.66	3.50919	3.0817	37.66	1.56073	2.55218
37.68	3.45235	3.01405	37.68	1.59723	2.67737
37.7	3.51579	3.42522	37.7	1.54246	2.64706
37.72	3.62955	3.64602	37.72	1.50624	2.5006
37.74	3.61107	3.6261	37.74	1.67196	2.69353
37.76	3.49785	3.45959	37.76	1.58161	2.60623
37.78	3.46108	3.73487	37.78	1.5555	2.77309
37.8	3.56221	3.73817	37.8	1.62783	2.42645
37.82	3.61138	3.72734	37.82	1.5959	2.47493
37.84	3.61499	3.56897	37.84	1.55771	2.72934
37.86	3.60031	3.55546	37.86	1.56503	2.48107
37.88	3.29393	3.57333	37.88	1.56157	2.65793
37.9	3.51269	3.23333	37.9	1.63414	2.26288
37.92	3.57222	3.52324	37.92	1.59103	2.31612
37.94	3.47857	3.24446	37.94	1.76689	2.4584
37.96	3.51369	3.1259	37.96	1.66326	2.41754
37.98	3.56184	3.14894	37.98	1.81607	2.31211
38	3.49515	3.35262	38	1.59726	2.31489
38.02	3.35444	3.15148	38.02	1.55534	2.07615
38.04	3.36519	3.01994	38.04	1.60755	2.54032
38.06	3.34806	2.88827	38.06	1.55927	2.59296
38.08	3.35701	2.92696	38.08	1.66001	2.32829
38.1	3.41854	3.62093	38.1	1.54581	2.59763
38.12	3.47218	3.17382	38.12	1.57184	2.59027
38.14	3.50568	3.20997	38.14	1.55815	2.6073
38.16	3.45348	3.16744	38.16	1.61666	2.54887
38.18	3.57031	3.34179	38.18	1.62574	2.3991
38.2	3.53772	3.47892	38.2	1.55453	2.18267
38.22	3.52775	3.28102	38.22	1.62319	2.01274
38.24	3.56249	3.37715	38.24	1.57234	2.33406
38.26	3.4894	3.52057	38.26	1.64424	2.42505
38.28	3.32236	3.66145	38.28	1.71699	2.54814
38.3	3.38278	3.66762	38.3	1.67033	2.55766
38.32	3.24849	3.60572	38.32	1.5716	2.18781
38.34	3.31642	3.5063	38.34	1.66317	2.74136
38.36	3.49037	3.39768	38.36	1.5982	2.55518
38.38	3.59834	2.80781	38.38	1.6079	3.03743
38.4	3.55122	2.58298	38.4	1.66571	2.82833
38.42	3.51405	2.71648	38.42	1.53288	3.07782
38.44	3.26727	2.79537	38.44	1.68076	2.54976
38.46	3.23834	3.37504	38.46	1.67053	2.68789
38.48	3.30517	3.76613	38.48	1.63718	2.56198
38.5	3.42423	2.95152	38.5	1.6909	2.73931
38.52	3.34551	2.77027	38.52	1.77257	2.43982
38.54	3.35125	2.73342	38.54	1.71374	2.54404
38.56	3.27905	3.147	38.56	1.65272	2.69534
38.58	3.40843	3.39047	38.58	1.66364	2.71479
38.6	3.50493	3.82905	38.6	1.58623	2.51878
38.62	3.46966	3.7645	38.62	1.58527	2.57297
38.64	3.56549	3.68003	38.64	1.70572	2.64889
38.66	3.59233	3.68782	38.66	1.57561	2.82352
38.68	3.39452	3.45305	38.68	1.61278	2.67923
38.7	3.35194	3.22038	38.7	1.6288	2.51544
38.72	3.465	3.43806	38.72	1.65332	2.55881
38.74	3.53322	3.57219	38.74	1.60948	2.41281
38.76	3.49663	3.65088	38.76	1.56881	2.72695
38.78	3.37521	3.63566	38.78	1.6489	2.6733
38.8	3.57624	3.65846	38.8	1.68574	2.88787
38.82	3.42858	3.51412	38.82	1.53399	2.73107
38.84	3.46394	3.52327	38.84	1.65559	3.07847
38.86	3.48195	3.56361	38.86	1.71048	2.56449
38.88	3.41559	3.56702	38.88	1.7	2.89303
38.9	3.3264	3.60522	38.9	1.74721	2.81983
38.92	3.52373	3.64014	38.92	1.5783	2.67962
38.94	3.53976	3.64588	38.94	1.65175	2.52302
38.96	3.50134	3.74521	38.96	1.72017	2.49673
38.98	3.44361	3.77151	38.98	1.7026	2.90343
39	3.50472	3.71088	39	1.72274	2.73029
39.02	3.3785	3.60194	39.02	1.69908	2.52017
39.04	3.50168	3.62485	39.04	1.73498	2.5884
39.06	3.61934	3.6442	39.06	1.64414	2.73227
39.08	3.60526	3.66577	39.08	1.68662	3.09283
39.1	3.60975	3.62601	39.1	1.70581	2.87922
39.12	3.44231	3.51894	39.12	1.6631	2.61141
39.14	3.51405	3.57898	39.14	1.55805	2.89292
39.16	3.43858	3.58141	39.16	1.62897	2.30967
39.18	3.52326	3.778	39.18	1.75316	2.43352
39.2	3.48908	3.47611	39.2	1.7382	2.75237
39.22	3.48882	3.69965	39.22	1.59329	2.61278
39.24	3.59946	3.53149	39.24	1.69944	2.58814
39.26	3.5857	3.38593	39.26	1.70082	2.4004
39.28	3.43854	3.42993	39.28	1.74483	2.33548
39.3	3.47075	3.56712	39.3	1.68978	2.19175
39.32	3.43639	3.34715	39.32	1.74499	2.67207
39.34	3.52839	3.3467	39.34	1.60568	2.31455
39.36	3.60721	3.47875	39.36	1.5973	2.40173
39.38	3.66186	3.54504	39.38	1.62908	2.75954
39.4	3.715	3.5195	39.4	1.5583	2.37136
39.42	3.56705	3.46805	39.42	1.54244	2.76085
39.44	3.54052	3.42014	39.44	1.58864	2.29314
39.46	3.55096	3.54875	39.46	1.7564	2.42222
39.48	3.58291	3.17225	39.48	1.74824	2.6267
39.5	3.47357	3.1194	39.5	1.5826	2.83716
39.52	3.60743	3.62221	39.52	1.59398	2.94609
39.54	3.62605	3.62615	39.54	1.63517	2.7086
39.56	3.67793	3.56511	39.56	1.6104	2.4363
39.58	3.92427	3.61779	39.58	1.67966	2.50524
39.6	3.63751	3.60815	39.6	1.76442	2.4046
39.62	3.56952	3.59078	39.62	1.69051	2.57544
39.64	3.45934	3.63301	39.64	1.54769	2.5212
39.66	3.37964	3.51223	39.66	1.62446	2.80186
39.68	3.33672	3.42383	39.68	1.49892	2.80494
39.7	3.47733	3.30757	39.7	1.57569	2.77373
39.72	3.49744	3.31383	39.72	1.62266	3.02168
39.74	3.54115	3.20599	39.74	1.65811	3.03858
39.76	3.4224	3.32269	39.76	1.62768	3.11668
39.78	3.52179	3.41091	39.78	1.65405	3.39201
39.8	3.45686	3.52582	39.8	1.64047	3.10649
39.82	3.63335	3.62872	39.82	1.64726	2.95897
39.84	3.66052	3.55332	39.84	1.70651	2.73624
39.86	3.61204	3.66097	39.86	1.57484	3.04247
39.88	3.4749	3.62267	39.88	1.67524	3.1217
39.9	3.48125	3.70762	39.9	1.676	3.41313
39.92	3.45693	3.61615	39.92	1.63213	3.43169
39.94	3.46047	3.46043	39.94	1.62465	3.21301
39.96	3.59711	3.42823	39.96	1.64241	3.60556
39.98	3.55335	3.58373	39.98	1.58943	3.47845
[truncated: 502 more rows]

## Sheet: Irbesartan
Time (ns)	protein_ARG1	LIG_Irbesartan	Time (ns)	protein_ARG2	LIG_Irbesartan
0.02	0.715456	1.47044	0.02	0.795593	1.02197
0.04	0.691444	1.15955	0.04	0.883623	0.702976
0.06	0.880265	1.1058	0.06	0.908474	1.1032
0.08	0.895318	1.40678	0.08	1.06255	1.68629
0.1	1.066	1.67408	0.1	0.979232	1.85782
0.12	1.03458	1.46205	0.12	0.972188	2.27518
0.14	1.19141	1.1725	0.14	1.08398	2.43783
0.16	1.34062	1.37065	0.16	1.09065	2.58977
0.18	1.34563	1.58521	0.18	1.01128	2.40999
0.2	1.27368	1.7877	0.2	1.14996	2.52295
0.22	1.2786	1.54416	0.22	1.16513	2.18859
0.24	1.55901	1.61633	0.24	1.15847	2.03637
0.26	1.70224	1.90113	0.26	1.19435	2.26612
0.28	1.63883	2.17002	0.28	1.14354	1.85569
0.3	1.68718	3.30023	0.3	1.19483	2.21461
0.32	1.80025	3.57367	0.32	1.43118	1.74987
0.34	1.48548	3.44174	0.34	1.38343	2.03431
0.36	1.45841	3.19761	0.36	1.28562	2.25653
0.38	1.49458	3.14217	0.38	1.21714	2.33192
0.4	1.62988	3.07357	0.4	1.19877	2.06309
0.42	1.68045	2.62092	0.42	1.34595	1.82414
0.44	1.86226	2.5756	0.44	1.43559	2.19801
0.46	1.77583	2.79856	0.46	1.22963	2.13488
0.48	1.61755	3.01964	0.48	1.16601	2.03155
0.5	1.54518	3.3079	0.5	1.36943	1.87151
0.52	1.47946	2.93046	0.52	1.18466	1.44052
0.54	1.56565	3.02811	0.54	1.27692	1.63439
0.56	1.81309	3.31358	0.56	1.26935	1.90776
0.58	1.88038	3.5496	0.58	1.31254	2.1351
0.6	1.67114	3.28054	0.6	1.4344	2.26336
0.62	1.73622	3.13939	0.62	1.47272	2.28517
0.64	1.7126	2.94291	0.64	1.43033	2.4631
0.66	1.80328	2.90362	0.66	1.30726	2.02519
0.68	1.73688	3.13167	0.68	1.29543	1.639
0.7	1.77404	2.92724	0.7	1.20207	2.31606
0.72	1.69549	3.16551	0.72	1.32424	2.26974
0.74	1.76643	3.17206	0.74	1.25858	2.28872
0.76	1.84539	3.01756	0.76	1.21374	1.90084
0.78	1.77345	2.99112	0.78	1.24546	2.25127
0.8	1.74359	3.23753	0.8	1.37832	2.16411
0.82	1.78502	3.44382	0.82	1.33303	2.06199
0.84	1.59629	3.44675	0.84	1.42396	2.63422
0.86	1.68837	3.5597	0.86	1.41663	2.53052
0.88	1.51408	3.75398	0.88	1.26806	2.27747
0.9	1.41863	3.69269	0.9	1.28789	2.35435
0.92	1.44476	3.40924	0.92	1.25954	2.18362
0.94	1.49943	3.47686	0.94	1.27092	2.29719
0.96	1.36616	3.40821	0.96	1.30769	2.1999
0.98	1.30842	3.10992	0.98	1.25309	2.19596
1	1.32986	3.34126	1	1.41255	2.5625
1.02	1.30704	3.16509	1.02	1.50255	2.41784
1.04	1.377	3.43343	1.04	1.50505	2.40999
1.06	1.40984	3.21447	1.06	1.36516	2.14004
1.08	1.48051	2.90034	1.08	1.51019	2.1243
1.1	1.53501	3.13236	1.1	1.40661	2.50912
1.12	1.59575	3.08661	1.12	1.42077	2.40336
1.14	1.42583	2.97567	1.14	1.4494	2.59939
1.16	1.40452	3.08531	1.16	1.41844	2.28419
1.18	1.39826	2.58582	1.18	1.41622	2.17276
1.2	1.35916	3.01491	1.2	1.56678	2.59074
1.22	1.38051	2.95452	1.22	1.48958	1.93162
1.24	1.49458	2.93657	1.24	1.54378	1.99777
1.26	1.47028	3.17081	1.26	1.44618	2.48962
1.28	1.46554	3.05939	1.28	1.52811	2.2846
1.3	1.49868	3.06564	1.3	1.43736	2.2634
1.32	1.52456	2.83413	1.32	1.42393	2.17316
1.34	1.5361	2.73042	1.34	1.41506	2.43008
1.36	1.54918	2.60561	1.36	1.47915	2.31728
1.38	1.63434	2.84979	1.38	1.32004	2.44067
1.4	1.62075	3.06893	1.4	1.47954	2.37942
1.42	1.55684	2.58871	1.42	1.46322	2.38431
1.44	1.8808	3.17534	1.44	1.40579	2.44491
1.46	1.72324	3.05922	1.46	1.26287	2.71324
1.48	1.76237	3.0298	1.48	1.3998	2.34567
1.5	1.72137	3.04526	1.5	1.3312	2.25886
1.52	1.88658	3.06302	1.52	1.28638	2.36946
1.54	1.9236	2.53456	1.54	1.36324	2.46512
1.56	1.81105	2.77126	1.56	1.36951	2.37564
1.58	2.01485	2.75886	1.58	1.2994	2.49648
1.6	2.02993	2.85543	1.6	1.29125	2.12816
1.62	2.01471	2.85365	1.62	1.38997	1.79267
1.64	1.94389	2.66284	1.64	1.33596	2.03393
1.66	2.05514	2.51981	1.66	1.39356	1.88475
1.68	2.15647	2.91781	1.68	1.46715	2.75353
1.7	2.07636	2.76828	1.7	1.42978	2.42555
1.72	2.17863	2.92795	1.72	1.5118	2.08842
1.74	2.00222	2.78638	1.74	1.48614	2.12411
1.76	1.97996	3.02553	1.76	1.47266	2.19548
1.78	1.94818	2.8513	1.78	1.56756	2.02843
1.8	1.7481	3.04831	1.8	1.60784	1.85296
1.82	1.64888	2.96585	1.82	1.53826	1.8904
1.84	1.588	3.14153	1.84	1.6657	2.25225
1.86	1.371	3.21369	1.86	1.55747	2.57171
1.88	1.43578	3.17054	1.88	1.54067	2.51718
1.9	1.55252	3.34599	1.9	1.56545	2.42735
1.92	1.65631	2.59978	1.92	1.52793	2.498
1.94	1.52917	2.94024	1.94	1.36627	2.21834
1.96	1.37723	2.76396	1.96	1.39981	2.19039
1.98	1.3765	2.45379	1.98	1.44385	2.56959
2	1.42869	2.66641	2	1.37822	2.5428
2.02	1.50772	2.84847	2.02	1.48885	2.55491
2.04	1.51929	2.81555	2.04	1.45312	2.88559
2.06	1.51812	2.72571	2.06	1.39873	2.99479
2.08	1.63221	2.65016	2.08	1.47791	3.33469
2.1	1.6178	2.54826	2.1	1.39877	3.09159
2.12	1.52037	2.78309	2.12	1.53508	2.90425
2.14	1.58179	2.01555	2.14	1.63176	3.14138
2.16	1.76684	2.0914	2.16	1.53847	3.19951
2.18	1.76861	2.26623	2.18	1.54097	3.16048
2.2	1.82741	2.49706	2.2	1.65732	3.16997
2.22	1.81064	2.86121	2.22	1.58108	3.28917
2.24	1.8138	3.07087	2.24	1.74313	3.05777
2.26	1.74621	3.52618	2.26	1.56114	3.21464
2.28	1.69333	2.99325	2.28	1.58998	3.15608
2.3	1.85803	3.01032	2.3	1.59733	3.14834
2.32	1.93482	3.56249	2.32	1.4902	3.09167
2.34	1.93652	3.00327	2.34	1.56078	3.02833
2.36	1.88753	2.89827	2.36	1.52146	3.19889
2.38	1.72955	2.84343	2.38	1.47027	3.19149
2.4	1.81308	2.5357	2.4	1.53475	3.48877
2.42	1.93489	3.54189	2.42	1.50792	3.17749
2.44	2.0621	3.177	2.44	1.46508	3.3394
2.46	1.90332	3.18979	2.46	1.48713	3.0776
2.48	1.80067	3.45235	2.48	1.47488	3.34239
2.5	1.90372	3.29366	2.5	1.36628	3.26363
2.52	1.87268	3.09458	2.52	1.61907	3.323
2.54	1.81042	2.77646	2.54	1.51578	3.45212
2.56	1.712	2.69526	2.56	1.62867	3.32572
2.58	1.76008	3.28063	2.58	1.50342	3.2495
2.6	1.74893	2.64465	2.6	1.5441	3.21912
2.62	1.72282	2.16952	2.62	1.5338	3.05693
2.64	1.93168	1.63489	2.64	1.38577	2.62073
2.66	1.89517	1.459	2.66	1.51984	2.40807
2.68	2.04523	1.2539	2.68	1.39602	2.62688
2.7	1.98782	1.16601	2.7	1.33656	2.25454
2.72	1.84159	1.19678	2.72	1.34758	2.44048
2.74	1.86093	1.14504	2.74	1.47006	2.26002
2.76	1.86523	1.02333	2.76	1.57993	2.61689
2.78	1.84549	1.15069	2.78	1.63594	2.52933
2.8	1.70425	1.27143	2.8	1.53068	2.40456
2.82	1.69087	1.57443	2.82	1.53675	2.13295
2.84	1.73361	1.41105	2.84	1.53801	2.41731
2.86	1.77845	1.23528	2.86	1.44407	3.09363
2.88	1.64587	1.16043	2.88	1.62315	3.14032
2.9	1.5789	1.25227	2.9	1.5832	3.25102
2.92	1.67825	1.10032	2.92	1.47764	3.28375
2.94	1.57606	1.77216	2.94	1.383	3.06066
2.96	1.63239	1.66362	2.96	1.54333	3.22957
2.98	1.75151	2.06422	2.98	1.46776	3.13002
3	1.75159	2.19191	3	1.52498	3.03785
3.02	1.66281	2.46799	3.02	1.44627	3.15711
3.04	1.70558	2.48927	3.04	1.5356	3.07149
3.06	1.61036	2.16208	3.06	1.45823	3.09488
3.08	1.64985	2.08956	3.08	1.4592	3.15019
3.1	1.8317	2.33156	3.1	1.4186	3.32882
3.12	1.8112	2.48752	3.12	1.45056	3.00922
3.14	1.81566	2.69018	3.14	1.40831	3.16747
3.16	1.57414	2.16618	3.16	1.43575	3.42885
3.18	1.5773	2.16786	3.18	1.38073	3.36129
3.2	1.57856	1.79345	3.2	1.47524	3.56642
3.22	1.52483	1.85184	3.22	1.40719	3.22722
3.24	1.56127	1.93954	3.24	1.44231	3.18501
3.26	1.7078	2.21393	3.26	1.46546	3.10248
3.28	1.75744	2.09302	3.28	1.44775	3.04623
3.3	1.7517	2.15596	3.3	1.4179	3.38324
3.32	1.78152	2.16564	3.32	1.58167	3.14676
3.34	1.92432	2.05727	3.34	1.6544	3.25333
3.36	1.87924	2.08133	3.36	1.69359	3.0216
3.38	1.92613	2.16308	3.38	1.5077	3.13408
3.4	1.87998	2.25904	3.4	1.53062	3.13335
3.42	1.91606	2.22111	3.42	1.588	3.16194
3.44	1.80897	2.11318	3.44	1.55612	3.21704
3.46	1.62495	2.3408	3.46	1.52847	3.14401
3.48	1.72722	3.03823	3.48	1.61211	3.01545
3.5	1.84204	2.62232	3.5	1.62468	2.92709
3.52	1.85201	2.50886	3.52	1.73021	3.14754
3.54	1.7152	2.27693	3.54	1.64692	3.29985
3.56	1.91385	2.45731	3.56	1.61866	3.27213
3.58	1.79147	2.62031	3.58	1.76544	3.36917
3.6	2.11685	2.3339	3.6	1.68363	2.91449
3.62	2.25365	2.12513	3.62	1.68174	2.95495
3.64	2.25388	2.28124	3.64	1.77477	2.98679
3.66	2.35746	2.33227	3.66	1.65021	2.92274
3.68	2.41511	1.7112	3.68	1.63518	2.85188
3.7	2.52626	1.86544	3.7	1.43239	2.80164
3.72	2.37535	2.33662	3.72	1.50713	3.00279
3.74	2.1902	2.26451	3.74	1.57396	3.06676
3.76	2.30643	2.44002	3.76	1.60088	2.83478
3.78	2.32503	1.98751	3.78	1.59698	3.14792
3.8	2.39455	2.53367	3.8	1.66006	2.88775
3.82	2.46396	2.20752	3.82	1.60599	3.07455
3.84	2.60403	2.22933	3.84	1.68358	3.10781
3.86	2.5427	2.36693	3.86	1.52013	2.98507
3.88	2.48125	2.38611	3.88	1.50827	2.98377
3.9	2.5001	2.64022	3.9	1.51842	3.12586
3.92	2.43113	2.01854	3.92	1.5414	2.94952
3.94	2.5726	2.45882	3.94	1.59348	3.28254
3.96	2.54039	1.84122	3.96	1.54138	2.93947
3.98	2.36546	2.42887	3.98	1.50291	2.78409
4	2.43632	2.45514	4	1.48494	3.12265
4.02	2.57292	2.63646	4.02	1.59175	3.11979
4.04	2.41081	2.18184	4.04	1.56263	3.14158
4.06	2.45217	2.13951	4.06	1.54367	3.09793
4.08	2.54423	1.76139	4.08	1.52656	3.02382
4.1	2.44885	1.97698	4.1	1.51411	3.15328
4.12	2.35544	2.20147	4.12	1.57441	3.18202
4.14	2.37747	1.80118	4.14	1.59719	3.13749
4.16	2.6702	1.78893	4.16	1.58251	3.07158
4.18	2.80911	1.50266	4.18	1.5806	3.31304
4.2	2.85453	1.51183	4.2	1.60079	3.34787
4.22	2.73919	1.24487	4.22	1.62371	3.19791
4.24	2.84356	1.49467	4.24	1.57317	3.22636
4.26	2.65074	1.67139	4.26	1.69248	3.12902
4.28	2.68874	1.62974	4.28	1.533	3.08625
4.3	2.75292	1.83762	4.3	1.62521	3.0172
4.32	2.54216	1.67682	4.32	1.69245	3.1947
4.34	2.60518	1.93979	4.34	1.48104	3.14815
4.36	2.69837	1.91392	4.36	1.65466	2.92582
4.38	2.75674	1.69452	4.38	1.51597	3.14968
4.4	2.79115	1.97889	4.4	1.58574	3.10987
4.42	2.79598	1.82324	4.42	1.61567	2.79991
4.44	2.66487	1.71264	4.44	1.66529	2.76951
4.46	2.72936	1.77341	4.46	1.67478	2.68297
4.48	2.79954	1.87585	4.48	1.60163	2.34621
4.5	2.58424	1.61115	4.5	1.65826	2.83437
4.52	2.53429	1.43314	4.52	1.60884	2.23096
4.54	2.48132	1.32814	4.54	1.59744	2.51298
4.56	2.38987	1.54481	4.56	1.5912	2.57168
4.58	2.5091	1.80413	4.58	1.66814	2.08091
4.6	2.43647	1.77409	4.6	1.6683	1.80777
4.62	2.51825	1.54264	4.62	1.65469	1.60778
4.64	2.53735	1.78814	4.64	1.64297	1.97494
4.66	2.5642	1.64453	4.66	1.71633	2.25456
4.68	2.54692	1.67708	4.68	1.58398	2.27071
4.7	2.61906	1.92443	4.7	1.67826	2.45732
4.72	2.62762	1.57288	4.72	1.62896	2.46238
4.74	2.62454	1.57794	4.74	1.80504	2.48722
4.76	2.38094	1.55972	4.76	1.63401	2.18953
4.78	2.40784	1.32649	4.78	1.72811	2.19534
4.8	2.48175	1.42063	4.8	1.73879	2.06754
4.82	2.40035	1.52375	4.82	1.73012	2.45503
4.84	2.40109	1.59117	4.84	1.71713	2.18265
4.86	2.27403	1.69038	4.86	1.73137	2.19332
4.88	2.23015	1.91223	4.88	1.58226	2.08368
4.9	2.30471	1.60738	4.9	1.46189	1.99452
4.92	2.18263	1.96313	4.92	1.57526	2.07074
4.94	2.21278	1.54676	4.94	1.72933	2.37202
4.96	2.14731	1.59267	4.96	1.68483	2.21664
4.98	2.17804	1.73444	4.98	1.70503	2.47085
5	2.16093	1.64143	5	1.72833	2.28432
5.02	2.12007	1.67626	5.02	1.72333	2.35965
5.04	2.01414	1.84905	5.04	1.62522	2.15311
5.06	1.96307	1.57342	5.06	1.65805	2.11692
5.08	2.07668	1.84544	5.08	1.71323	2.20096
5.1	1.92279	1.79903	5.1	1.89412	1.91231
5.12	1.93005	2.23686	5.12	1.80484	1.91599
5.14	1.91254	1.80645	5.14	1.74451	2.14789
5.16	1.98557	1.59806	5.16	1.83005	1.81004
5.18	2.04656	1.7265	5.18	1.89687	1.9072
5.2	2.24642	1.55558	5.2	1.72643	2.15543
5.22	2.33836	1.72938	5.22	1.66579	2.03541
5.24	2.26262	1.54028	5.24	1.61159	2.05989
5.26	2.28178	1.59963	5.26	1.54097	2.06403
5.28	2.43734	1.64519	5.28	1.62101	2.06095
5.3	2.66411	1.76138	5.3	1.65667	2.15149
5.32	2.54811	1.77036	5.32	1.61985	2.02284
5.34	2.46188	1.78209	5.34	1.60112	2.08047
5.36	2.59733	1.6174	5.36	1.68647	1.78845
5.38	2.60982	2.05657	5.38	1.6217	2.03696
5.4	2.62579	1.96019	5.4	1.69138	1.90551
5.42	2.60459	1.71933	5.42	1.70783	2.03158
5.44	2.74902	1.96409	5.44	1.61589	2.18964
5.46	2.87897	1.86646	5.46	1.62134	2.13379
5.48	2.79551	1.6604	5.48	1.71907	2.21285
5.5	2.80392	1.9121	5.5	1.6475	2.01728
5.52	2.8762	1.89614	5.52	1.72718	2.29958
5.54	3.13791	1.90355	5.54	1.6593	2.7418
5.56	3.37077	1.85154	5.56	1.68466	2.67246
5.58	3.28541	1.792	5.58	1.70487	2.68615
5.6	3.27509	1.77255	5.6	1.64086	2.91507
5.62	3.17296	1.64923	5.62	1.63075	2.90561
5.64	2.894	1.56709	5.64	1.7177	2.9301
5.66	2.78651	1.88423	5.66	1.81659	2.84964
5.68	2.76182	1.64144	5.68	1.66803	2.95156
5.7	2.61852	1.79094	5.7	1.65227	2.96654
5.72	2.68867	2.01345	5.72	1.69883	2.95283
5.74	2.81638	0.954514	5.74	1.78062	2.98842
5.76	2.76698	1.68044	5.76	1.73193	2.96118
5.78	2.89352	1.43124	5.78	1.68708	2.94565
5.8	2.68412	1.29304	5.8	1.78582	3.06085
5.82	2.55959	1.53523	5.82	1.81909	2.96581
5.84	2.51482	1.5614	5.84	1.76539	3.09748
5.86	2.43148	1.88348	5.86	1.75323	2.93442
5.88	2.64534	2.10532	5.88	1.67811	2.91465
5.9	2.80311	2.55698	5.9	1.62788	3.05831
5.92	3.00019	2.33763	5.92	1.60302	2.90923
5.94	2.71089	2.13579	5.94	1.57671	2.97365
5.96	2.73287	2.10958	5.96	1.56681	2.95678
5.98	2.8658	2.12492	5.98	1.58902	2.93555
6	2.87	2.39992	6	1.57489	3.04144
6.02	2.78941	2.346	6.02	1.61281	3.18268
6.04	2.7797	2.30762	6.04	1.66506	3.22091
6.06	2.74189	2.55774	6.06	1.59263	3.51742
6.08	2.73803	2.39757	6.08	1.65792	3.32881
6.1	2.79675	2.44007	6.1	1.7432	3.23841
6.12	2.70831	2.5557	6.12	1.71699	3.24243
6.14	2.65773	2.21544	6.14	1.73343	3.37964
6.16	2.79029	2.355	6.16	1.68694	3.38425
6.18	2.75354	2.29844	6.18	1.66843	3.28496
6.2	2.94498	2.254	6.2	1.72446	3.08336
6.22	3.0431	2.22998	6.22	1.81038	3.60073
6.24	3.04112	2.33217	6.24	1.62874	2.70716
6.26	3.00475	2.56155	6.26	1.6487	2.94421
6.28	2.84528	2.50177	6.28	1.60384	3.52139
6.3	2.82251	2.49292	6.3	1.69578	3.2598
6.32	2.9964	2.50024	6.32	1.54352	3.44077
6.34	3.18238	2.37691	6.34	1.69655	3.29691
6.36	3.30465	2.49023	6.36	1.67571	3.38436
6.38	3.32755	2.37291	6.38	1.70038	3.2699
6.4	3.23317	2.19673	6.4	1.74933	3.28376
6.42	3.46389	2.07332	6.42	1.72257	3.43671
6.44	3.59332	2.00399	6.44	1.79657	3.25054
6.46	3.56974	2.11361	6.46	1.8187	3.43845
6.48	3.55158	1.97938	6.48	1.75487	3.20819
6.5	3.55981	2.23709	6.5	1.75417	3.20688
6.52	3.54644	1.82963	6.52	1.79623	3.60087
6.54	3.11415	1.78544	6.54	1.87964	3.41448
6.56	3.08624	1.62671	6.56	1.86616	3.27618
6.58	3.2783	1.72557	6.58	1.75751	3.35152
6.6	3.23894	1.3628	6.6	1.64703	3.3562
6.62	3.17055	1.27504	6.62	1.72358	3.50075
6.64	3.258	1.45541	6.64	1.77701	3.52242
6.66	3.08353	1.86565	6.66	1.85787	3.3968
6.68	3.10068	1.82279	6.68	1.7733	3.82642
6.7	3.24159	1.9234	6.7	1.74401	3.38514
6.72	3.31614	2.00034	6.72	1.80963	3.37879
6.74	3.16093	2.12805	6.74	1.81447	3.5044
6.76	2.90328	1.99974	6.76	1.77495	3.44115
6.78	2.87176	1.80618	6.78	1.89613	3.23769
6.8	3.01737	1.76611	6.8	1.89657	3.19521
6.82	3.02547	1.5069	6.82	1.76593	3.28096
6.84	3.0887	1.43843	6.84	1.84822	3.07752
6.86	3.05409	1.2982	6.86	1.95388	3.00998
6.88	2.89113	1.70382	6.88	1.91625	2.99078
6.9	2.63622	2.05643	6.9	1.93393	3.17019
6.92	2.78062	2.02749	6.92	1.97102	3.08703
6.94	2.79318	1.59059	6.94	1.84072	3.07412
6.96	2.57245	1.60955	6.96	1.81713	3.26454
6.98	2.37658	1.486	6.98	1.87312	3.13784
7	2.39775	1.201	7	1.80872	3.08005
7.02	2.65071	1.38665	7.02	1.8045	3.18191
7.04	2.58038	1.5052	7.04	1.75484	3.07467
7.06	2.7303	1.42078	7.06	1.77001	2.97069
7.08	2.78342	1.33501	7.08	1.79699	3.09718
7.1	2.85543	1.6236	7.1	1.89538	3.18849
7.12	2.89178	1.71066	7.12	1.91262	3.29126
7.14	2.81319	2.16318	7.14	1.95371	3.45002
7.16	2.91251	1.57997	7.16	2.01053	2.94629
7.18	2.98063	1.81779	7.18	1.95634	2.88893
7.2	3.0405	1.96475	7.2	1.93576	3.06644
7.22	3.11394	1.81856	7.22	1.89447	2.8444
7.24	2.76814	1.7355	7.24	1.82792	2.89803
7.26	2.89269	1.7313	7.26	1.9924	2.92929
7.28	2.99103	1.75779	7.28	1.95016	2.9151
7.3	2.96367	1.5688	7.3	1.94709	2.8956
7.32	2.71988	1.36336	7.32	1.97104	2.92419
7.34	2.63889	1.55789	7.34	1.94162	2.54694
7.36	2.58412	1.60023	7.36	1.78061	2.58048
7.38	2.99268	1.8746	7.38	1.74728	2.92654
7.4	3.19385	1.71569	7.4	1.84544	2.79012
7.42	2.88392	1.6786	7.42	1.88914	2.96115
7.44	2.99712	1.77143	7.44	1.90412	2.93449
7.46	2.97255	1.75825	7.46	1.78912	2.95612
7.48	2.98768	1.65248	7.48	1.92809	2.82635
7.5	3.19072	1.66673	7.5	1.89997	2.88011
7.52	3.1706	1.75141	7.52	1.9098	2.88485
7.54	2.91349	1.61106	7.54	1.96341	2.9537
7.56	2.77443	1.63636	7.56	2.01117	2.86819
7.58	2.75595	1.64391	7.58	1.98379	2.87781
7.6	2.68423	1.95514	7.6	1.93151	2.92266
7.62	3.00846	1.66417	7.62	2.0678	3.0703
7.64	2.85823	1.97222	7.64	2.09388	2.9367
7.66	2.87536	1.70693	7.66	1.96277	3.13233
7.68	2.85787	2.08248	7.68	1.97898	3.43839
7.7	3.06358	2.00638	7.7	1.94183	3.30589
7.72	2.94554	2.27251	7.72	1.94114	3.17086
7.74	2.98441	1.63327	7.74	1.89361	3.35634
7.76	2.96373	1.64065	7.76	1.93388	2.8423
7.78	2.7506	1.58304	7.78	1.9903	2.78999
7.8	2.67143	1.96364	7.8	2.09118	2.38671
7.82	2.69847	1.48991	7.82	1.99738	2.6389
7.84	2.63583	1.84324	7.84	2.02372	2.70157
7.86	2.59448	1.97972	7.86	2.00034	2.60785
7.88	2.82744	1.95044	7.88	1.80828	2.8802
7.9	2.7912	2.17571	7.9	1.90429	2.4265
7.92	2.67339	2.411	7.92	1.85251	2.70455
7.94	2.70669	2.13905	7.94	1.83038	2.89119
7.96	2.69397	1.82109	7.96	1.81706	2.94698
7.98	2.84573	1.43838	7.98	1.96897	3.00691
8	2.74575	1.66208	8	1.93536	2.9751
8.02	2.54489	1.30511	8.02	1.90306	2.6233
8.04	2.63829	1.79668	8.04	1.85019	2.40345
8.06	2.64853	1.66613	8.06	2.01044	2.82886
8.08	2.48294	1.81453	8.08	1.8869	2.49251
8.1	2.41409	1.56946	8.1	1.90616	2.74145
8.12	2.28785	1.67046	8.12	1.87633	2.89269
8.14	2.17471	1.65618	8.14	1.8609	2.7588
8.16	2.3583	1.65675	8.16	1.85572	2.71531
8.18	2.51801	1.9964	8.18	1.97741	2.51955
8.2	2.42462	1.86509	8.2	1.85749	2.73809
8.22	2.29361	2.22981	8.22	1.86463	2.5276
8.24	2.37453	1.42578	8.24	1.91591	2.69179
8.26	2.22235	1.4971	8.26	1.97721	2.70001
8.28	2.36407	1.44186	8.28	1.8758	2.90079
8.3	2.36082	1.40245	8.3	1.83721	3.09345
8.32	2.33806	1.40555	8.32	1.97985	2.87821
8.34	2.34257	1.67189	8.34	1.92777	2.98556
8.36	2.48245	1.71075	8.36	1.85065	2.96671
8.38	2.48701	1.51911	8.38	1.93258	2.71034
8.4	2.70985	1.47109	8.4	1.8776	2.85533
8.42	2.62183	1.49939	8.42	1.9293	2.70264
8.44	2.63268	1.16845	8.44	1.87517	2.75881
8.46	2.88805	1.24858	8.46	1.97358	2.82107
8.48	2.83016	1.22795	8.48	1.88649	2.72274
8.5	2.65612	1.45646	8.5	1.98455	2.88223
8.52	2.49788	1.45703	8.52	1.98323	2.65721
8.54	2.57052	1.58208	8.54	1.9491	2.96715
8.56	2.47499	1.53325	8.56	1.99852	2.5142
8.58	2.52454	1.2309	8.58	1.98436	2.80128
8.6	2.7258	1.27247	8.6	2.10289	2.89156
8.62	2.72505	1.20007	8.62	2.06196	2.3496
8.64	2.53584	1.50104	8.64	2.04071	2.54995
8.66	2.50069	1.31813	8.66	1.98081	2.88059
8.68	2.60884	1.30352	8.68	2.07804	3.01946
8.7	2.48466	1.64741	8.7	2.0545	2.82534
8.72	2.50241	1.28461	8.72	2.08592	2.8386
8.74	2.44637	1.42268	8.74	1.92079	2.63413
8.76	2.42651	1.25235	8.76	1.94019	2.69184
8.78	2.38446	1.53655	8.78	1.82996	2.76578
8.8	2.33532	1.69776	8.8	1.92761	2.82738
8.82	2.53823	1.52031	8.82	1.95473	2.91871
8.84	2.56361	1.37976	8.84	1.95299	2.96842
8.86	2.47629	1.40181	8.86	2.06683	2.98871
8.88	2.5654	1.43027	8.88	1.96189	2.84032
8.9	2.52112	1.39573	8.9	1.96751	2.9753
8.92	2.54081	1.86745	8.92	1.95335	3.10797
8.94	2.551	2.11601	8.94	2.06288	3.23573
8.96	2.78026	2.07323	8.96	2.02237	3.16104
8.98	2.81804	2.05573	8.98	1.86459	3.26446
9	3.05691	2.22322	9	2.03515	3.16348
9.02	2.95011	2.70225	9.02	2.02072	3.12763
9.04	3.0751	2.57588	9.04	2.04955	2.93536
9.06	2.97787	2.61174	9.06	2.15405	2.88915
9.08	2.96803	2.56475	9.08	1.91955	2.76506
9.1	3.06104	2.64103	9.1	2.05329	2.96205
9.12	2.93207	2.46538	9.12	2.12728	2.60617
9.14	3.11138	2.64541	9.14	2.06281	2.36575
9.16	3.23172	2.84886	9.16	2.02753	2.78474
9.18	3.00024	2.91281	9.18	2.15398	2.95153
9.2	3.02924	2.7548	9.2	2.09131	3.01551
9.22	3.11083	3.10973	9.22	2.16625	3.10197
9.24	3.13026	2.98474	9.24	2.10415	2.94799
9.26	3.07307	2.90345	9.26	2.0843	2.84107
9.28	3.03458	3.04097	9.28	2.15912	2.74575
9.3	3.03898	2.61852	9.3	2.05796	2.7921
9.32	2.94504	2.77643	9.32	2.00281	2.83274
9.34	3.00155	2.54485	9.34	2.03074	2.92135
9.36	3.1656	2.67147	9.36	2.03589	3.01224
9.38	3.23467	2.63025	9.38	2.01102	2.96577
9.4	3.14834	2.53137	9.4	2.05079	2.99178
9.42	3.09606	2.63749	9.42	2.11654	3.00522
9.44	2.98103	2.77195	9.44	2.07955	3.00765
9.46	2.92726	2.60262	9.46	2.01267	2.9052
9.48	2.98015	2.3814	9.48	2.12287	2.95624
9.5	2.93637	2.34708	9.5	1.98605	3.0447
9.52	2.93886	2.86315	9.52	2.15819	2.87931
9.54	3.01687	2.99243	9.54	2.10621	2.30493
9.56	3.10402	2.76481	9.56	2.08215	2.8218
9.58	3.00376	2.54405	9.58	2.07912	3.09575
9.6	2.91353	2.2366	9.6	2.1207	2.94706
9.62	2.91033	2.31492	9.62	2.18012	2.86109
9.64	2.96394	1.95763	9.64	2.13657	3.13816
9.66	2.95261	1.91528	9.66	2.04621	3.0922
9.68	3.03074	2.11959	9.68	1.99564	3.14039
9.7	3.01716	2.14374	9.7	1.92306	3.09844
9.72	3.14265	1.97347	9.72	2.08517	3.00772
9.74	3.11224	2.14744	9.74	2.03678	3.09283
9.76	3.24153	2.36488	9.76	2.06535	3.14582
9.78	3.19475	1.72138	9.78	2.09458	3.21725
9.8	3.03517	1.93914	9.8	2.14694	3.20209
9.82	2.96405	2.46096	9.82	2.03044	3.41579
9.84	2.95683	2.0071	9.84	2.06321	3.28032
9.86	3.18875	1.9972	9.86	1.93544	3.31296
9.88	3.02327	2.30887	9.88	1.99785	3.48036
9.9	3.11213	1.78672	9.9	1.97874	3.4956
9.92	3.00504	1.70422	9.92	1.90886	3.35262
9.94	3.06586	1.75186	9.94	2.05777	3.17138
9.96	3.05426	1.73801	9.96	1.97021	3.37235
9.98	3.00905	1.74591	9.98	2.02224	3.65424
10	3.00931	1.94458	10	2.20385	3.23705
10.02	2.95358	1.80997	10.02	2.18825	3.1558
10.04	2.93959	2.11094	10.04	2.11755	3.39262
10.06	3.03332	1.88988	10.06	2.00625	3.28355
10.08	3.00809	1.989	10.08	2.08411	3.12482
10.1	3.12698	2.39372	10.1	2.11338	3.32041
10.12	3.15327	2.30119	10.12	2.1473	3.15413
10.14	3.36562	2.27352	10.14	2.06908	3.56871
10.16	3.42666	2.33691	10.16	2.08898	3.65161
10.18	3.51264	2.1812	10.18	2.02518	3.4184
10.2	3.14213	2.15957	10.2	2.24412	3.48791
10.22	3.20931	2.46856	10.22	2.09713	3.18378
10.24	3.11237	2.23681	10.24	2.15203	2.99865
10.26	2.90816	2.11096	10.26	2.14723	2.88208
10.28	2.86067	2.07921	10.28	2.16173	2.96729
10.3	2.87338	1.92444	10.3	2.109	3.03882
10.32	2.9433	1.26434	10.32	2.1611	2.88286
10.34	3.05747	1.90363	10.34	2.17673	2.79819
10.36	2.88129	2.03301	10.36	2.09231	2.83007
10.38	3.0035	1.52113	10.38	1.9988	2.89674
10.4	3.07513	2.34381	10.4	2.01386	2.79234
10.42	2.9882	1.55283	10.42	1.99241	2.88738
10.44	3.08832	1.76682	10.44	2.09833	3.06521
10.46	2.95546	2.31811	10.46	2.13259	2.96418
10.48	3.13811	2.12231	10.48	2.04515	2.92104
10.5	2.89672	2.07929	10.5	2.12519	3.19589
10.52	3.01786	1.94687	10.52	2.23701	3.16827
10.54	2.89445	1.75496	10.54	2.11395	3.0135
10.56	2.72723	1.75597	10.56	2.15106	3.13134
10.58	2.71695	1.7122	10.58	2.1071	2.95164
10.6	2.76953	1.69667	10.6	2.13362	3.05067
10.62	2.66786	1.41985	10.62	2.02141	3.00238
10.64	2.88713	1.44957	10.64	2.12479	3.0153
10.66	2.80854	1.43277	10.66	2.12969	2.80474
10.68	2.7286	1.76018	10.68	2.10115	2.84165
10.7	2.74534	1.86856	10.7	2.09093	2.59911
10.72	2.67365	1.88711	10.72	2.10173	2.97039
10.74	2.62565	1.76681	10.74	2.13278	2.81631
10.76	2.81178	1.85889	10.76	2.0736	2.83702
10.78	2.72637	1.82647	10.78	2.04888	2.62146
10.8	2.96195	1.47202	10.8	1.96527	2.63245
10.82	2.89488	1.42965	10.82	2.10592	2.13113
10.84	2.87153	1.6545	10.84	2.01074	1.86481
10.86	2.87925	1.50233	10.86	2.11675	2.60666
10.88	2.95245	2.04446	10.88	2.10733	2.3823
10.9	2.77331	2.14414	10.9	2.05956	2.43067
10.92	2.79191	2.1087	10.92	2.03091	2.73652
10.94	2.89061	1.83904	10.94	2.0534	2.35932
10.96	2.92315	1.75499	10.96	2.05893	2.87127
10.98	2.90326	1.30725	10.98	2.00025	2.84767
11	2.94484	1.38555	11	2.09764	2.70232
11.02	2.90688	1.64211	11.02	2.0339	2.4068
11.04	2.91319	1.5786	11.04	2.03394	2.11642
11.06	2.77646	1.70382	11.06	2.09034	2.40831
11.08	2.64763	1.4495	11.08	1.98528	2.61703
11.1	2.57346	1.41731	11.1	2.0791	2.68275
11.12	2.72481	1.19485	11.12	2.10892	2.50245
11.14	2.7266	1.42611	11.14	2.05826	2.40783
11.16	2.65875	1.89298	11.16	1.92046	2.61047
11.18	2.60969	1.96375	11.18	2.0265	2.6219
11.2	2.48974	2.33013	11.2	1.98261	2.55406
11.22	2.55814	1.87115	11.22	2.04483	2.544
11.24	2.63563	2.31886	11.24	2.0473	2.94297
11.26	2.65234	2.36233	11.26	2.07826	2.93241
11.28	2.53728	2.04747	11.28	1.98104	2.92254
11.3	2.58141	2.20716	11.3	2.00825	2.95082
11.32	2.56819	2.61616	11.32	2.01735	3.04683
11.34	2.69553	2.69228	11.34	2.05395	3.0214
11.36	2.71577	2.70453	11.36	2.05929	3.2881
11.38	2.86029	1.96642	11.38	2.16064	3.23231
11.4	2.88516	2.72802	11.4	2.20172	3.1762
11.42	2.88903	2.34766	11.42	2.07454	3.27306
11.44	2.93577	2.44246	11.44	2.04497	3.17385
11.46	2.86745	2.09091	11.46	2.08376	1.98323
11.48	2.94735	2.14062	11.48	2.09057	2.04974
11.5	2.79573	1.85518	11.5	2.08818	1.46942
11.52	2.86912	2.18497	11.52	2.15414	1.37797
11.54	3.01405	2.28501	11.54	2.05535	1.09797
11.56	2.91344	2.30518	11.56	2.03108	1.16158
11.58	3.0779	2.12609	11.58	1.98917	1.00134
11.6	2.99714	2.08838	11.6	2.19016	1.00845
11.62	2.99583	2.03818	11.62	2.10959	1.62958
11.64	2.94686	1.9737	11.64	2.02348	1.71186
11.66	3.05217	2.27299	11.66	2.08764	1.30013
11.68	3.10926	2.39383	11.68	2.12208	1.54104
11.7	3.08373	2.17341	11.7	2.16921	2.49417
11.72	3.16735	2.12637	11.72	2.15953	1.45078
11.74	2.96173	1.62124	11.74	2.10495	1.56329
11.76	2.92148	2.22718	11.76	2.16052	1.33934
11.78	2.77957	1.89024	11.78	2.08332	1.49134
11.8	2.87931	1.59134	11.8	2.02304	1.43955
11.82	2.74987	1.77501	11.82	2.09388	1.44008
11.84	2.77337	1.88909	11.84	2.20753	1.60396
11.86	2.88059	2.9069	11.86	2.13104	1.87503
11.88	2.73674	3.34328	11.88	2.07449	2.8465
11.9	2.73588	1.88281	11.9	2.20026	2.75468
11.92	2.81237	2.08489	11.92	2.1566	2.85926
11.94	2.84477	2.28299	11.94	2.14771	3.03515
11.96	2.8905	1.81562	11.96	2.16943	3.08082
11.98	2.83324	1.77775	11.98	2.25217	3.69189
12	2.85713	1.92142	12	2.31501	3.60394
12.02	2.84441	1.8126	12.02	2.17545	2.80684
12.04	3.00833	1.34441	12.04	2.13226	2.30258
12.06	3.05594	1.50277	12.06	2.11609	2.5419
12.08	3.00014	1.42257	12.08	2.06265	2.41238
12.1	2.93632	1.31386	12.1	2.09595	2.13748
12.12	2.96174	1.63591	12.12	1.9319	2.9683
12.14	2.8882	1.76148	12.14	2.0658	3.04871
12.16	2.83717	1.62445	12.16	2.07917	3.06779
12.18	2.87923	1.84839	12.18	2.05997	2.87382
12.2	2.78046	2.17264	12.2	2.03974	2.56135
12.22	2.78232	2.22001	12.22	2.07172	1.63599
12.24	2.71902	2.11634	12.24	2.11131	1.25333
12.26	2.73727	2.25662	12.26	2.05562	1.8262
12.28	2.61899	2.2805	12.28	2.00737	1.87575
12.3	2.71377	1.40697	12.3	2.12194	2.33611
12.32	2.72589	1.37841	12.32	2.11646	2.10575
12.34	2.77804	1.39729	12.34	2.15165	1.39062
12.36	2.67987	1.75358	12.36	2.09775	1.65096
12.38	2.73556	1.58977	12.38	2.11016	2.34961
12.4	2.77768	1.41803	12.4	2.07552	2.34357
12.42	2.73173	1.9028	12.42	2.07517	2.05176
12.44	2.7874	1.93262	12.44	2.13274	2.05329
12.46	2.57416	1.6324	12.46	2.22612	3.13962
12.48	2.70273	1.97774	12.48	2.18877	3.14774
12.5	2.73086	1.91917	12.5	2.01366	2.84254
12.52	2.71262	2.45407	12.52	2.16004	3.22441
12.54	2.68936	2.19764	12.54	2.09265	3.27948
12.56	2.6194	1.84185	12.56	2.10692	2.96515
12.58	2.67045	1.65218	12.58	2.16599	3.26934
12.6	2.61094	1.47266	12.6	2.14336	3.52749
12.62	2.64501	1.41138	12.62	2.18349	3.31676
12.64	2.66064	1.55682	12.64	2.08071	3.40692
12.66	2.58698	1.38183	12.66	2.20427	3.35054
12.68	2.6694	1.71318	12.68	2.14767	3.23473
12.7	2.83329	1.51221	12.7	2.16199	3.43872
12.72	2.62402	1.3768	12.72	2.05137	3.20391
12.74	2.74954	1.29103	12.74	2.01649	3.4459
12.76	2.74867	1.28418	12.76	2.00063	3.32866
12.78	2.80489	1.82343	12.78	2.03757	3.40082
12.8	2.77088	1.59413	12.8	2.1128	3.48227
12.82	2.76604	2.20587	12.82	2.06991	2.35841
12.84	2.80016	2.00913	12.84	2.15222	1.71709
12.86	2.70264	1.64227	12.86	2.12391	2.169
12.88	2.61626	1.56248	12.88	2.09939	2.27859
12.9	2.66557	1.91992	12.9	2.15292	2.04814
12.92	2.64199	1.75636	12.92	2.1061	2.03322
12.94	2.56744	1.82267	12.94	2.18401	2.02382
12.96	2.64381	1.70257	12.96	2.17306	1.84019
12.98	2.73569	1.45843	12.98	2.07991	1.86885
13	2.72183	1.54885	13	2.02916	1.58927
13.02	2.71681	1.65821	13.02	2.11583	1.64932
13.04	2.63619	0.991844	13.04	2.13076	1.67498
13.06	2.67397	1.88077	13.06	2.11258	1.81026
13.08	2.65517	1.60505	13.08	2.12992	1.97582
13.1	2.59602	1.99065	13.1	2.13188	1.81044
13.12	2.62281	1.52031	13.12	2.11887	1.87664
13.14	2.7409	1.35249	13.14	2.0449	2.63512
13.16	2.7989	1.55258	13.16	2.06011	1.70739
13.18	2.66959	1.52709	13.18	2.18671	2.0114
13.2	2.68995	1.58737	13.2	2.12306	1.87311
13.22	2.73307	1.37571	13.22	2.10765	1.8795
13.24	2.72089	1.70336	13.24	2.0296	1.43067
13.26	2.63833	1.79474	13.26	2.00213	1.5483
13.28	2.69741	1.70048	13.28	2.11585	2.13269
13.3	2.70546	1.24177	13.3	1.94285	1.98458
13.32	2.68261	1.40967	13.32	2.04263	1.87355
13.34	2.70304	1.27061	13.34	1.94195	2.13834
13.36	2.83758	1.14012	13.36	2.03838	2.55605
13.38	2.8011	1.53726	13.38	1.96381	1.98765
13.4	2.80563	1.57035	13.4	2.01637	1.63761
13.42	2.81815	1.90575	13.42	2.11238	1.42632
13.44	2.81298	1.44087	13.44	2.05907	1.91447
13.46	2.91289	1.28516	13.46	2.09231	1.54075
13.48	2.86109	1.12963	13.48	2.11857	2.07547
13.5	2.86053	1.42244	13.5	2.00998	1.75598
13.52	2.91785	1.47593	13.52	1.94049	1.70163
13.54	2.97356	1.231	13.54	2.17234	1.69116
13.56	2.88913	1.39759	13.56	2.13169	1.4764
13.58	2.9219	1.08081	13.58	2.10507	2.08801
13.6	2.89643	1.25648	13.6	2.07023	2.36536
13.62	2.95407	1.36865	13.62	2.05437	2.10017
13.64	2.8795	1.26308	13.64	2.03484	1.71833
13.66	3.08756	1.12709	13.66	2.12267	2.45662
13.68	3.02228	0.904283	13.68	2.08594	2.12307
13.7	3.0989	0.916985	13.7	2.09264	2.2628
13.72	3.04541	1.07786	13.72	2.03927	2.06644
13.74	2.91738	1.51521	13.74	2.03491	3.02533
13.76	2.99598	1.33176	13.76	2.17117	2.54686
13.78	2.9171	2.03566	13.78	2.07759	2.52217
13.8	2.86497	2.30295	13.8	2.07835	2.60156
13.82	2.95929	2.06222	13.82	1.94253	2.96894
13.84	2.83147	1.80856	13.84	2.07735	2.87704
13.86	2.89364	1.92909	13.86	1.99573	3.07241
13.88	2.83048	1.96062	13.88	2.11575	2.3478
13.9	2.87583	1.69148	13.9	2.11871	1.45185
13.92	2.9196	2.05597	13.92	2.02434	2.054
13.94	3.0664	2.14053	13.94	2.12682	2.45744
13.96	2.84233	1.85274	13.96	2.04407	2.31787
13.98	2.82328	1.8421	13.98	2.07906	2.77082
14	2.85346	2.23766	14	2.04783	3.07723
14.02	2.8821	1.63256	14.02	2.01051	3.02662
14.04	2.88181	2.15562	14.04	2.02485	2.90295
14.06	2.76907	2.00403	14.06	2.00656	2.77948
14.08	2.72465	2.32266	14.08	2.00393	2.39346
14.1	2.73494	2.33879	14.1	2.12757	2.37474
14.12	2.65843	2.31331	14.12	2.13055	2.81351
14.14	2.70934	2.17527	14.14	2.07573	2.67639
14.16	2.74594	2.04568	14.16	2.11915	2.47594
14.18	2.76203	2.39764	14.18	2.10369	2.39595
14.2	2.79377	2.39666	14.2	2.05923	2.70552
14.22	2.81021	2.09938	14.22	2.11029	3.49576
14.24	2.86928	2.10888	14.24	2.06723	3.47467
14.26	2.86558	1.99882	14.26	2.0914	3.27247
14.28	2.95869	2.26295	14.28	2.0317	3.13524
14.3	2.9368	1.97041	14.3	2.1156	3.54813
14.32	2.9364	2.11099	14.32	2.11709	3.24892
14.34	2.83431	2.13163	14.34	2.07978	3.13888
14.36	2.80488	1.91011	14.36	1.97411	3.2876
14.38	2.91908	2.18494	14.38	2.09375	3.14448
14.4	2.83273	2.2806	14.4	2.14096	3.47388
14.42	2.89963	2.26349	14.42	2.03513	3.21109
14.44	2.94886	2.49828	14.44	2.04183	3.21858
14.46	2.86184	2.40701	14.46	2.10176	3.03057
14.48	2.91614	2.28689	14.48	2.07955	2.76625
14.5	2.99512	2.14113	14.5	2.00351	2.88627
14.52	3.02136	1.89351	14.52	2.02629	2.83914
14.54	2.88162	2.30334	14.54	2.02308	2.20664
14.56	2.75294	2.25078	14.56	2.0109	2.65179
14.58	2.72056	2.25247	14.58	2.08721	3.34309
14.6	2.76836	1.77742	14.6	1.96973	2.93925
14.62	2.76526	1.87483	14.62	2.133	3.13794
14.64	2.81495	1.63344	14.64	2.02048	2.8665
14.66	2.76769	1.80865	14.66	1.95969	2.92249
14.68	2.79431	1.94931	14.68	2.10656	2.91525
14.7	2.80666	1.65298	14.7	2.04271	3.11544
14.72	2.81702	1.692	14.72	2.02802	2.55271
14.74	2.74574	1.88253	14.74	2.02546	3.12159
14.76	2.7525	1.85553	14.76	2.0697	3.12313
14.78	2.65676	1.88809	14.78	2.07689	3.14486
14.8	2.49347	2.04904	14.8	1.97893	3.04171
14.82	2.64642	2.06159	14.82	1.90798	3.14802
14.84	2.56646	1.82879	14.84	1.85208	3.02967
14.86	2.58255	2.01769	14.86	2.0003	3.02373
14.88	2.60191	2.09482	14.88	1.95717	3.06887
14.9	2.62611	2.22539	14.9	2.08615	3.19662
14.92	2.70533	2.33175	14.92	1.98951	3.1699
14.94	2.82856	2.50648	14.94	1.95945	3.50439
14.96	2.75112	2.03809	14.96	1.98925	2.91662
14.98	2.81527	2.40329	14.98	2.02365	3.19101
15	2.76965	2.00054	15	2.06901	3.47561
15.02	2.81223	2.16719	15.02	2.01737	2.98747
15.04	2.83596	2.24385	15.04	2.02171	3.77807
15.06	2.88725	2.31892	15.06	1.9392	3.59689
15.08	2.93536	2.03548	15.08	1.93973	3.28918
15.1	2.9695	1.92741	15.1	1.93868	3.68769
15.12	2.95399	1.58662	15.12	1.95597	3.63391
15.14	2.9546	1.90551	15.14	1.97944	3.29659
15.16	3.0031	1.94815	15.16	1.88029	3.70865
15.18	3.11357	1.99954	15.18	1.91785	3.32733
15.2	2.93698	2.16217	15.2	1.86813	3.02614
15.22	3.01506	2.06521	15.22	1.98638	3.37602
15.24	2.97198	1.68692	15.24	1.97208	3.0878
15.26	3.05882	1.76269	15.26	2.05772	3.73192
15.28	3.0159	1.80105	15.28	1.90239	3.59511
15.3	3.10784	1.97088	15.3	1.95969	2.99946
15.32	3.10771	2.28108	15.32	1.94993	3.20244
15.34	3.03248	2.09914	15.34	2.00165	3.18192
15.36	2.97378	1.98537	15.36	2.1095	2.85605
15.38	2.9746	1.82664	15.38	2.03166	3.16557
15.4	3.02833	1.93952	15.4	2.03526	3.3024
15.42	3.05303	1.8174	15.42	1.91119	3.20103
15.44	3.00407	2.10454	15.44	2.07167	3.24637
15.46	2.98256	1.92223	15.46	2.06035	3.11763
15.48	2.96268	1.81934	15.48	1.96176	3.07416
15.5	2.98315	1.74413	15.5	2.00819	3.33463
15.52	2.90522	1.97029	15.52	2.07182	3.46079
15.54	2.99661	1.82702	15.54	2.10767	2.99868
15.56	2.93828	2.07304	15.56	2.03839	3.22544
15.58	2.94495	2.21216	15.58	1.99976	2.92968
15.6	2.94482	2.38807	15.6	1.94078	2.9927
15.62	3.03011	2.42097	15.62	1.9648	3.0347
15.64	3.11063	2.35683	15.64	1.97	3.37594
15.66	3.06603	2.43305	15.66	1.9799	3.07279
15.68	3.01187	2.37594	15.68	2.07512	3.20315
15.7	3.09674	2.21959	15.7	1.97993	3.11448
15.72	2.97098	2.37441	15.72	2.11719	3.00293
15.74	3.03176	2.04843	15.74	1.94762	3.07479
15.76	3.01397	2.50719	15.76	1.98792	3.26091
15.78	3.07689	1.92895	15.78	1.94287	3.18462
15.8	2.99324	2.00142	15.8	1.96451	3.00932
15.82	2.9397	2.03663	15.82	2.01364	3.09585
15.84	2.99651	1.93996	15.84	2.12726	3.02685
15.86	3.02145	1.78086	15.86	2.01688	3.08583
15.88	3.04725	2.13112	15.88	2.09183	3.15653
15.9	3.03668	1.98512	15.9	2.03251	2.96666
15.92	2.96358	1.86494	15.92	2.13338	3.45565
15.94	2.97374	2.1726	15.94	1.98188	2.91005
15.96	2.90439	1.80548	15.96	2.00038	2.93752
15.98	3.0104	1.84349	15.98	1.95393	3.01437
16	2.88554	1.72411	16	1.85252	2.94386
16.02	2.963	1.99298	16.02	2.05836	2.85429
16.04	3.04338	2.02671	16.04	1.95369	3.04394
16.06	3.0466	1.42372	16.06	1.88835	3.36106
16.08	2.98534	2.0351	16.08	1.8957	3.36891
16.1	2.89043	2.08	16.1	1.98696	3.25237
16.12	3.00156	2.30484	16.12	1.95018	3.19492
16.14	2.91021	1.7806	16.14	2.00865	3.0888
16.16	2.97142	1.62069	16.16	1.91686	3.13934
16.18	2.90891	2.14249	16.18	1.86955	3.33471
16.2	2.98936	2.12705	16.2	1.86095	3.25653
16.22	2.91516	1.57481	16.22	1.93381	3.07173
16.24	2.97126	1.64812	16.24	2.02199	3.50646
16.26	2.93015	1.66516	16.26	2.08569	3.91139
16.28	2.9732	1.70883	16.28	1.99423	3.8341
16.3	3.00858	1.71438	16.3	2.08271	3.68746
16.32	2.96245	1.9316	16.32	2.0487	3.45902
16.34	2.97155	2.36563	16.34	2.11733	3.4577
16.36	2.99851	2.88193	16.36	2.05926	3.84452
16.38	3.03668	2.74215	16.38	2.14153	3.61633
16.4	3.01017	2.83693	16.4	2.0459	3.82079
16.42	2.98102	3.2031	16.42	2.01847	3.57026
16.44	2.82757	2.85611	16.44	2.08696	3.59264
16.46	2.84677	2.89233	16.46	2.14959	3.83621
16.48	2.8342	2.9782	16.48	1.9591	3.14611
16.5	2.92124	3.06815	16.5	1.99984	3.76551
16.52	2.91994	2.99055	16.52	1.95965	3.30025
16.54	2.97945	3.05564	16.54	1.86629	3.39019
16.56	2.86755	2.92458	16.56	1.97486	3.66767
16.58	2.98294	3.12226	16.58	1.96075	3.49711
16.6	2.89395	2.87429	16.6	2.00284	3.30232
16.62	2.98176	3.23466	16.62	2.03768	3.37697
16.64	3.00389	2.9546	16.64	1.92618	3.7081
16.66	2.98838	2.92113	16.66	2.03486	3.1063
16.68	2.85231	2.9906	16.68	1.94767	3.18945
16.7	2.86843	2.93428	16.7	1.96987	3.0765
16.72	2.92694	2.86649	16.72	2.00385	2.94276
16.74	2.9828	2.74882	16.74	1.90592	3.18375
16.76	3.01687	3.0454	16.76	1.91154	2.98512
16.78	2.97714	2.95656	16.78	1.91884	1.93841
16.8	2.93679	2.97156	16.8	1.82278	1.39216
16.82	2.99525	2.98834	16.82	1.8515	1.74881
16.84	3.13699	3.0691	16.84	1.84556	2.24291
16.86	3.02327	2.95605	16.86	1.93855	2.16142
16.88	3.02693	2.94429	16.88	1.90919	2.23101
16.9	3.09994	3.11806	16.9	2.04414	2.57788
16.92	3.07032	3.03298	16.92	2.00248	2.2991
16.94	3.05416	2.86329	16.94	1.97492	2.71066
16.96	2.96314	3.01913	16.96	2.09502	2.21597
16.98	2.98524	2.70299	16.98	2.09512	2.14848
17	2.99239	3.05429	17	1.91806	2.56409
17.02	2.87335	2.73653	17.02	1.9638	2.93035
17.04	2.93664	2.71286	17.04	2.00752	2.70313
17.06	2.92551	2.97763	17.06	2.06651	2.25947
17.08	2.97331	3.18501	17.08	1.91546	2.72174
17.1	2.90518	3.1295	17.1	1.91344	2.92292
17.12	2.91176	3.02049	17.12	1.90351	3.1535
17.14	2.84142	2.96874	17.14	1.88754	3.19816
17.16	2.9104	3.07049	17.16	1.79603	3.03806
17.18	2.96257	2.93554	17.18	1.88883	2.6445
17.2	2.90603	3.23125	17.2	1.98368	3.30108
17.22	2.83003	2.9452	17.22	1.87204	3.11236
17.24	2.94395	3.07884	17.24	1.9507	2.97757
17.26	2.89168	3.04232	17.26	2.0269	3.11492
17.28	2.83009	3.07577	17.28	2.06606	3.16927
17.3	2.94497	3.04628	17.3	1.99127	3.34354
17.32	3.00794	2.97326	17.32	2.06284	3.10256
17.34	2.97476	3.06556	17.34	1.90056	3.29202
17.36	3.02686	2.90831	17.36	2.03884	3.22796
17.38	2.96548	2.97511	17.38	1.90462	3.24381
17.4	2.92448	2.89581	17.4	1.90784	3.17823
17.42	2.92176	2.89525	17.42	1.88206	2.67339
17.44	2.84607	2.64358	17.44	1.78881	2.98501
17.46	2.89344	2.79896	17.46	1.8514	3.19569
17.48	2.94985	3.07853	17.48	1.92872	3.31202
17.5	2.9991	2.9823	17.5	1.8625	3.25143
17.52	2.87504	3.03141	17.52	1.90352	3.32144
17.54	2.90617	2.8535	17.54	1.95018	3.39987
17.56	2.94177	2.82248	17.56	1.90547	3.49637
17.58	2.90776	2.87716	17.58	1.88112	3.37853
17.6	2.95957	2.94222	17.6	1.93296	3.60843
17.62	2.98083	3.04375	17.62	1.99502	3.60149
17.64	2.89322	2.79732	17.64	1.88165	3.57151
17.66	2.92411	2.97803	17.66	1.94952	3.67755
17.68	3.05142	3.322	17.68	1.97279	3.35545
17.7	2.92061	2.75468	17.7	1.8938	3.68632
17.72	3.05062	3.04721	17.72	1.99508	3.60498
17.74	3.03088	2.96791	17.74	1.97162	3.28727
17.76	3.09457	2.82759	17.76	2.01867	3.35229
17.78	3.03016	3.05571	17.78	2.05052	3.35986
17.8	2.97882	3.00163	17.8	1.90622	3.41113
17.82	2.94815	3.15385	17.82	1.92978	3.14947
17.84	2.99777	2.83052	17.84	2.00511	3.00896
17.86	2.91392	3.20088	17.86	1.95294	3.46345
17.88	2.99537	3.27724	17.88	1.80159	3.22036
17.9	3.00305	3.23889	17.9	1.92493	3.1324
17.92	2.97017	2.96244	17.92	1.92356	3.36762
17.94	3.01967	3.10471	17.94	1.97276	3.33186
17.96	2.99572	3.07891	17.96	1.91341	3.53986
17.98	3.09532	3.01782	17.98	2.00044	3.82474
18	3.13992	2.85711	18	1.99037	3.41781
18.02	3.02552	3.19822	18.02	1.97922	3.03442
18.04	2.98164	3.04747	18.04	1.95724	3.63875
18.06	2.96602	2.79524	18.06	1.98695	3.2307
18.08	2.95023	2.97686	18.08	2.0129	3.51417
18.1	2.97026	3.19177	18.1	2.08374	3.24787
18.12	2.95801	2.94536	18.12	2.07288	3.39786
18.14	3.00196	2.95467	18.14	1.96746	3.49165
18.16	2.95195	2.83388	18.16	2.11488	3.47186
18.18	2.96264	3.00235	18.18	2.07569	3.24225
18.2	2.99253	2.911	18.2	2.10824	3.14808
18.22	3.04056	2.96858	18.22	2.00849	3.53849
18.24	3.03495	2.9254	18.24	2.02857	3.02443
18.26	2.97924	2.82918	18.26	2.14045	3.13986
18.28	3.01525	2.86829	18.28	2.01487	3.03624
18.3	3.04521	3.13359	18.3	2.04851	3.82338
18.32	2.99067	3.30609	18.32	2.0883	3.7825
18.34	3.10059	3.31848	18.34	2.01838	3.31475
18.36	3.01714	3.54514	18.36	2.03328	3.23145
18.38	3.04455	3.38563	18.38	1.96898	3.3945
18.4	3.02205	3.23184	18.4	1.95883	3.76636
18.42	3.00377	3.01088	18.42	1.89572	3.6134
18.44	3.04331	3.29326	18.44	2.0306	3.23159
18.46	3.05045	3.5097	18.46	1.99269	3.33673
18.48	3.08691	3.53109	18.48	2.06459	3.26144
18.5	3.01959	3.30586	18.5	2.08352	3.18358
18.52	2.97286	3.00508	18.52	2.01656	3.66149
18.54	2.98474	3.06007	18.54	2.02468	3.66596
18.56	2.98159	2.96834	18.56	1.95223	3.24835
18.58	3.00153	3.00688	18.58	1.93837	3.36481
18.6	2.94883	3.0681	18.6	1.9921	3.67269
18.62	2.94458	3.05166	18.62	1.98628	3.67648
18.64	2.98788	2.93415	18.64	1.9932	3.63527
18.66	2.99036	3.11809	18.66	1.93377	3.38011
18.68	2.95371	2.95373	18.68	1.84158	3.36777
18.7	2.96958	2.84197	18.7	1.82673	3.54291
18.72	2.99096	2.97312	18.72	1.84867	3.56889
18.74	2.9693	2.76852	18.74	1.76749	3.60506
18.76	2.98061	2.86796	18.76	1.89647	3.24981
18.78	2.99569	2.98613	18.78	1.86083	1.9088
18.8	3.06693	2.96124	18.8	1.81544	1.44315
18.82	3.0729	2.84692	18.82	1.8248	1.78212
18.84	2.94387	2.66213	18.84	1.79283	3.16581
18.86	2.92593	2.85828	18.86	1.82701	3.47192
18.88	3.03995	2.90401	18.88	1.87309	3.54054
18.9	3.09654	2.79466	18.9	1.81954	3.46522
18.92	2.96709	3.00069	18.92	1.90793	3.48939
18.94	3.10103	2.98221	18.94	1.78484	3.69653
18.96	3.03209	2.88692	18.96	1.75698	3.38694
18.98	2.95308	2.89165	18.98	1.79988	3.45578
19	3.05601	3.01226	19	1.87918	3.12872
19.02	3.06841	3.21056	19.02	1.84171	2.71763
19.04	3.00086	2.97622	19.04	1.93684	2.84698
19.06	3.03246	2.91142	19.06	1.9096	3.19109
19.08	3.02416	2.951	19.08	1.9523	3.70432
19.1	3.09285	2.92782	19.1	1.85446	3.34796
19.12	3.09553	2.9325	19.12	1.87731	3.37907
19.14	3.02637	2.88665	19.14	1.87098	3.58275
19.16	3.10961	2.90452	19.16	1.77926	3.77704
19.18	3.05657	2.76435	19.18	1.89229	3.58773
19.2	3.07567	2.71619	19.2	1.86054	3.63572
19.22	3.0633	2.90069	19.22	1.79727	3.3253
19.24	3.16286	2.67082	19.24	1.92828	3.08925
19.26	3.04229	2.85216	19.26	1.79806	3.73063
19.28	2.97243	2.63522	19.28	1.82199	3.13497
19.3	3.04519	2.77283	19.3	1.88631	3.18848
19.32	3.0408	2.85951	19.32	1.86788	2.99736
19.34	3.11448	2.80224	19.34	1.78682	3.28042
19.36	3.09268	2.99526	19.36	1.82922	3.57738
19.38	3.12571	2.89995	19.38	1.83857	2.92879
19.4	3.07771	2.63427	19.4	1.90569	2.79833
19.42	3.11521	2.60187	19.42	1.92913	2.77032
19.44	3.12197	2.79799	19.44	2.00272	3.68413
19.46	3.06743	2.54994	19.46	1.94326	3.78347
19.48	3.13374	2.78353	19.48	1.98062	3.56927
19.5	3.19554	2.64435	19.5	1.92275	3.76934
19.52	3.15928	2.83196	19.52	1.88395	3.07207
19.54	3.16687	2.97972	19.54	1.96367	2.89418
19.56	3.15769	2.80916	19.56	1.81249	3.13069
19.58	3.15857	2.9314	19.58	1.90736	3.6679
19.6	3.15539	2.83761	19.6	1.95041	3.36372
19.62	3.03525	3.00009	19.62	1.87949	3.56755
19.64	3.10317	2.91303	19.64	1.91779	3.18435
19.66	3.07044	2.94007	19.66	1.92279	2.74452
19.68	3.08824	2.79096	19.68	1.97428	3.64841
19.7	3.09512	3.18038	19.7	1.92495	3.46707
19.72	3.13603	3.23175	19.72	1.93912	3.74023
19.74	3.10346	2.54398	19.74	1.93634	3.26289
19.76	2.96181	3.00922	19.76	1.91997	3.30059
19.78	3.04462	2.96871	19.78	1.91142	3.7569
19.8	3.01976	2.63494	19.8	1.96985	3.53704
19.82	3.03659	2.78655	19.82	2.01696	3.39491
19.84	3.0626	2.60426	19.84	1.923	3.02386
19.86	2.98312	2.95336	19.86	1.94188	3.38829
19.88	2.98673	2.70724	19.88	1.92692	3.15423
19.9	3.10677	2.99594	19.9	1.84195	3.35806
19.92	3.08601	3.17359	19.92	1.89834	3.38356
19.94	2.99381	3.21673	19.94	1.88875	3.116
19.96	2.94772	3.11	19.96	1.97102	3.05213
19.98	2.95356	3.12622	19.98	1.95735	3.66067
20	2.99041	3.09789	20	1.94115	3.38457
20.02	2.97985	2.73249	20.02	2.03901	3.43427
20.04	3.04286	2.80779	20.04	1.96936	3.37751
20.06	2.9795	3.05953	20.06	1.96685	3.21951
20.08	2.99935	2.88358	20.08	1.9164	3.37354
20.1	2.99798	2.87437	20.1	1.92177	3.44358
20.12	2.98157	2.7158	20.12	1.94515	3.87141
20.14	2.99149	2.7577	20.14	1.8604	3.05236
20.16	2.94605	3.13106	20.16	1.8991	3.44384
20.18	2.95063	3.08291	20.18	1.89487	2.73133
20.2	2.91722	2.62546	20.2	2.0136	3.1214
20.22	2.89891	2.50214	20.22	2.08514	3.08234
20.24	2.96828	2.70422	20.24	1.98978	3.28302
20.26	2.9878	2.65805	20.26	2.14976	3.10596
20.28	3.03059	2.75183	20.28	2.02454	3.02834
20.3	2.98629	3.05276	20.3	1.99573	3.16984
20.32	2.94497	2.86737	20.32	2.07943	3.18696
20.34	2.99502	2.93339	20.34	2.00836	3.11974
20.36	2.94491	2.96703	20.36	2.12362	3.10713
20.38	2.96548	2.92446	20.38	1.95471	3.24495
20.4	2.98223	3.25248	20.4	1.96396	3.09792
20.42	3.03094	3.08594	20.42	1.99475	3.30746
20.44	3.0115	2.96871	20.44	2.0999	3.32838
20.46	2.99979	2.7053	20.46	1.98959	3.34038
20.48	2.99874	2.80531	20.48	1.97306	3.23672
20.5	2.93819	2.5266	20.5	1.92796	3.16345
20.52	2.94832	2.85289	20.52	1.96741	3.19844
20.54	3.01365	3.37989	20.54	1.90803	3.3712
20.56	2.94689	2.88931	20.56	1.96428	3.13085
20.58	3.02913	2.80774	20.58	2.05681	3.41897
20.6	3.00107	3.02491	20.6	2.05575	3.26215
20.62	2.94773	3.3009	20.62	1.94259	3.21571
20.64	3.00916	3.31013	20.64	1.98739	3.00397
20.66	3.02623	3.5151	20.66	2.01254	2.88002
20.68	2.96195	3.33877	20.68	2.10873	2.92813
20.7	2.97184	3.40407	20.7	2.01561	3.14136
20.72	3.03197	3.14346	20.72	2.0276	3.2498
20.74	2.96986	3.30403	20.74	2.0601	2.98328
20.76	3.00921	2.83425	20.76	2.09191	3.11649
20.78	3.05474	2.95239	20.78	2.0575	3.36203
20.8	2.95283	2.97137	20.8	2.05238	3.54588
20.82	2.94818	2.82643	20.82	2.02245	3.50022
20.84	3.16882	3.22221	20.84	2.01374	3.24864
20.86	3.02247	3.10554	20.86	2.02057	2.93566
20.88	3.03506	2.9288	20.88	2.09046	3.08779
20.9	3.08233	2.84205	20.9	2.0482	3.38537
20.92	3.08741	2.89552	20.92	1.9942	3.46103
20.94	3.09807	3.03388	20.94	2.00977	3.52903
20.96	3.03178	3.07193	20.96	2.11191	3.18971
20.98	3.02771	3.13973	20.98	2.05598	3.21867
21	3.03204	2.80976	21	2.01943	3.39972
21.02	3.09779	2.63239	21.02	2.01589	3.49566
21.04	3.08616	2.97332	21.04	1.98435	3.78762
21.06	3.03829	2.95571	21.06	2.04285	3.45797
21.08	3.15886	3.06677	21.08	2.03306	3.75485
21.1	3.08142	3.22793	21.1	2.01767	3.74841
21.12	3.04597	3.08724	21.12	2.01869	3.63632
21.14	3.17089	3.20434	21.14	2.06033	3.63054
21.16	3.0624	3.30955	21.16	1.97839	3.71671
21.18	3.09972	3.44802	21.18	1.94091	3.5891
21.2	3.13645	3.13417	21.2	1.98012	3.52572
21.22	3.16667	3.60558	21.22	2.00948	3.2346
21.24	3.18517	3.52621	21.24	2.00797	3.13995
21.26	3.07754	3.63556	21.26	1.95333	3.17902
21.28	2.92308	3.58336	21.28	1.99713	3.14061
21.3	2.89552	3.33913	21.3	1.95643	2.82066
21.32	2.85843	3.39085	21.32	1.95184	3.24239
21.34	2.84484	3.10943	21.34	1.98082	3.00999
21.36	2.86406	3.19567	21.36	2.0283	3.30618
21.38	2.83168	3.04947	21.38	1.91483	3.18237
21.4	2.8701	2.87647	21.4	1.96433	2.81399
21.42	2.82508	3.09138	21.42	2.02888	3.22369
21.44	2.84185	3.1629	21.44	2.01492	2.84188
21.46	2.7696	3.43718	21.46	1.99443	3.25067
21.48	2.87765	3.13035	21.48	1.98341	3.35485
21.5	2.95131	2.81837	21.5	1.98528	3.66853
21.52	2.89811	3.17632	21.52	2.03438	3.54368
21.54	2.80553	3.03177	21.54	1.98243	3.53623
21.56	2.84478	3.16128	21.56	2.02984	3.69219
21.58	2.8194	3.02552	21.58	2.01146	3.73767
21.6	2.75309	3.41755	21.6	2.06694	3.42689
21.62	2.87117	2.99581	21.62	2.0239	3.73767
21.64	2.85658	2.89732	21.64	2.04349	3.77958
21.66	2.96188	3.08805	21.66	2.07925	3.51211
21.68	2.84653	2.88427	21.68	2.00715	3.42129
21.7	2.9301	2.50119	21.7	1.95972	3.52881
21.72	2.93496	2.78315	21.72	2.01971	3.60138
21.74	2.98288	2.68459	21.74	1.90983	3.37303
21.76	2.98318	3.05523	21.76	1.93111	3.90441
21.78	3.09782	3.13422	21.78	2.00252	3.32406
21.8	3.09781	2.73413	21.8	1.96042	3.48286
21.82	3.23158	3.10755	21.82	1.96396	3.55645
21.84	3.19138	3.16874	21.84	1.96893	3.42518
21.86	3.06552	3.11906	21.86	1.95973	3.5362
21.88	3.0108	2.82414	21.88	1.97539	3.78846
21.9	3.09987	2.6679	21.9	1.97404	3.73759
21.92	3.01387	2.91998	21.92	2.00761	3.50571
21.94	3.19468	2.55172	21.94	1.91871	3.62647
21.96	3.07617	2.90607	21.96	1.9451	3.8544
21.98	3.21999	2.75772	21.98	1.96751	3.65814
22	3.27448	2.96674	22	1.97646	3.47415
22.02	3.17275	2.81073	22.02	2.0087	3.56775
22.04	3.10238	2.96366	22.04	2.02722	3.76483
22.06	3.26573	2.84501	22.06	1.98943	3.65426
22.08	3.2352	3.11961	22.08	1.95776	3.66829
22.1	3.34062	2.82628	22.1	1.9864	3.77338
22.12	3.22263	2.9651	22.12	1.99076	3.93511
22.14	3.29492	3.02833	22.14	1.88559	3.75724
22.16	3.23853	2.92752	22.16	1.9551	3.62254
22.18	3.24176	3.05487	22.18	1.9322	3.85588
22.2	3.06764	2.98837	22.2	1.95569	3.73959
22.22	3.07027	3.22417	22.22	1.87287	3.44276
22.24	3.01704	2.76947	22.24	1.92616	3.62701
22.26	3.06148	3.01588	22.26	1.87716	3.59054
22.28	2.95595	2.69471	22.28	1.89502	3.63634
22.3	2.98235	2.53292	22.3	1.91194	3.11615
22.32	2.97232	2.97678	22.32	1.90815	3.33133
22.34	3.08646	2.62594	22.34	1.90223	2.99693
22.36	3.12726	2.777	22.36	1.85024	3.1969
22.38	3.04375	2.9349	22.38	1.81395	3.22114
22.4	3.17898	2.84294	22.4	1.8544	3.0484
22.42	3.27071	3.03995	22.42	1.91119	3.27597
22.44	3.26088	3.0757	22.44	1.91728	3.43516
22.46	3.16287	2.98412	22.46	1.9785	2.97371
22.48	3.12116	2.89053	22.48	1.90972	3.29228
22.5	3.21993	2.7229	22.5	1.99308	3.38389
22.52	3.12649	2.48364	22.52	1.93874	3.39449
22.54	3.16769	2.80878	22.54	1.95559	3.57212
22.56	3.17473	2.87861	22.56	1.83642	3.66085
22.58	3.35387	3.21182	22.58	1.97287	3.81677
22.6	3.50829	2.49772	22.6	1.96173	3.55682
22.62	3.48777	2.65822	22.62	1.95721	3.81463
22.64	3.42555	2.99302	22.64	1.89319	3.81563
22.66	3.44616	2.54645	22.66	1.88838	3.72196
22.68	3.40582	2.84562	22.68	1.95261	3.72438
22.7	3.36394	2.72315	22.7	1.94924	3.50265
22.72	3.37201	3.11902	22.72	1.90399	3.7008
22.74	3.27136	3.34754	22.74	1.84216	3.60679
22.76	3.19321	3.19111	22.76	1.89094	3.45358
22.78	3.26829	3.22283	22.78	1.91836	3.62567
22.8	3.26453	3.14352	22.8	1.92812	3.69877
22.82	3.29909	3.2945	22.82	1.90421	3.49844
22.84	3.30787	2.91324	22.84	1.92785	3.59099
22.86	3.33234	2.61341	22.86	1.94702	3.53265
22.88	3.39526	2.64542	22.88	1.96163	3.11222
22.9	3.39049	2.78959	22.9	2.03102	3.29092
22.92	3.62832	3.15966	22.92	1.88624	3.46656
22.94	3.58453	2.84827	22.94	1.94462	3.28598
22.96	3.59311	2.90492	22.96	1.97098	3.85663
22.98	3.53201	2.88588	22.98	1.98091	3.82517
23	3.55402	3.0426	23	1.97311	3.36609
23.02	3.53215	3.29199	23.02	1.95791	3.27662
23.04	3.41308	2.81189	23.04	1.97245	3.60083
23.06	3.6126	3.02915	23.06	2.02339	3.34713
23.08	3.45786	3.26815	23.08	1.95751	3.50817
23.1	3.591	3.60939	23.1	1.97812	3.66094
23.12	3.53721	3.49186	23.12	1.83422	3.56211
23.14	3.62161	3.37742	23.14	1.90277	3.90664
23.16	3.62426	3.27473	23.16	1.89814	3.84594
23.18	3.59998	2.84155	23.18	1.83223	3.63095
23.2	3.53125	3.06357	23.2	1.90907	3.84963
23.22	3.43945	2.72738	23.22	1.90724	3.79742
23.24	3.53219	2.80597	23.24	1.92915	3.89612
23.26	3.46638	3.28801	23.26	1.9105	3.61561
23.28	3.47114	2.8679	23.28	1.85573	3.50836
23.3	3.50512	3.07934	23.3	1.81238	3.68074
23.32	3.51817	3.40679	23.32	1.87879	3.76195
23.34	3.36735	3.32007	23.34	1.95955	3.53566
23.36	3.4006	3.04845	23.36	1.93926	3.38999
23.38	3.39779	3.30555	23.38	1.90944	3.71428
23.4	3.37471	3.05484	23.4	2.01698	3.81037
23.42	3.27861	2.97381	23.42	2.01717	3.70508
23.44	3.2828	3.00168	23.44	1.9888	3.98323
23.46	3.24849	2.93689	23.46	1.9259	3.74696
23.48	3.22008	3.10819	23.48	1.9192	4.01409
23.5	3.2432	2.98533	23.5	1.97972	4.0679
23.52	3.19473	3.15251	23.52	1.97007	3.99883
23.54	3.09974	3.10408	23.54	1.95891	3.75024
23.56	3.11955	3.40261	23.56	1.99886	3.9936
23.58	2.98006	3.48203	23.58	1.96591	3.78635
23.6	3.18376	3.08482	23.6	1.94726	3.58926
23.62	3.10164	3.39456	23.62	1.94996	3.51447
23.64	3.11316	3.39221	23.64	1.90283	3.90071
23.66	3.22102	3.1854	23.66	1.986	3.69083
23.68	3.07206	3.5184	23.68	1.86681	3.63406
23.7	3.0925	3.41144	23.7	1.96971	3.73168
23.72	3.04303	3.25981	23.72	1.97781	3.82714
23.74	3.02187	3.28507	23.74	1.99116	3.73366
23.76	3.05061	3.35082	23.76	1.98004	3.47127
23.78	2.86924	3.1238	23.78	1.98241	3.92092
23.8	2.96279	3.28317	23.8	1.84237	3.69551
23.82	2.96904	3.35076	23.82	1.86473	3.35024
23.84	2.90527	3.34584	23.84	1.86526	3.7832
23.86	2.9183	3.35015	23.86	1.91125	3.64626
23.88	2.97751	3.34084	23.88	2.00529	3.23519
23.9	2.93518	3.49557	23.9	1.88448	3.68036
23.92	2.99258	3.40881	23.92	1.91776	3.71006
23.94	2.98093	3.3593	23.94	1.86848	3.6108
23.96	2.89679	3.41409	23.96	1.9269	3.31438
23.98	2.91721	3.21427	23.98	1.92273	3.65134
24	2.98717	3.44925	24	1.93087	3.24724
24.02	2.9673	3.48779	24.02	1.92069	3.13509
24.04	2.89869	3.33997	24.04	1.83631	3.83168
24.06	2.99431	3.5011	24.06	1.875	3.87585
24.08	2.96335	3.65694	24.08	1.73309	3.95301
24.1	2.9877	3.68253	24.1	1.808	3.66823
24.12	3.05457	3.57503	24.12	1.82304	3.89819
24.14	3.13427	3.47593	24.14	1.86186	3.71062
24.16	3.15595	3.37536	24.16	1.75192	3.58542
24.18	3.00705	3.50308	24.18	1.79361	3.64555
24.2	2.91755	3.49572	24.2	1.7292	3.8863
24.22	3.04513	3.51034	24.22	1.77311	3.93973
24.24	3.11325	3.4251	24.24	1.87517	3.78293
24.26	3.10651	3.44718	24.26	1.83613	3.94222
24.28	3.1932	3.3656	24.28	1.80965	3.34904
24.3	3.28017	3.73405	24.3	1.71129	2.89491
24.32	3.31538	3.15928	24.32	1.84891	3.16157
24.34	3.13809	3.52124	24.34	1.86373	3.55084
24.36	3.06262	3.54942	24.36	1.81904	3.63429
24.38	3.0395	3.57147	24.38	1.81027	3.42953
24.4	2.97598	3.19968	24.4	1.74071	3.67403
24.42	2.91735	3.51137	24.42	1.77422	3.01391
24.44	2.92937	3.4107	24.44	1.8099	3.49143
24.46	3.00617	3.43139	24.46	1.79647	3.06734
24.48	2.8899	3.46015	24.48	1.77535	3.53306
24.5	2.88559	3.54216	24.5	1.72359	3.76268
24.52	2.87773	3.19834	24.52	1.79631	3.45585
24.54	2.73245	3.5397	24.54	1.88959	3.49132
24.56	2.83942	3.41926	24.56	1.74136	3.70035
24.58	2.84367	3.27847	24.58	1.82519	3.73146
24.6	2.72031	3.41584	24.6	1.73503	3.44907
24.62	2.87026	3.43157	24.62	1.77565	3.33361
24.64	2.86011	2.58306	24.64	1.75259	3.93186
24.66	2.72831	2.59702	24.66	1.82268	3.88881
24.68	2.7906	2.69751	24.68	1.82408	3.79037
24.7	2.84182	2.72344	24.7	1.92285	3.70733
24.72	2.8847	3.0607	24.72	1.82256	3.93745
24.74	2.8109	3.37867	24.74	1.83619	3.951
24.76	2.93153	3.10564	24.76	1.82067	3.84586
24.78	2.89145	3.11091	24.78	1.78854	3.91459
24.8	2.7437	2.4247	24.8	1.83724	3.73857
24.82	2.81879	2.93357	24.82	1.78312	3.75705
24.84	2.7749	3.33335	24.84	1.77974	3.53326
24.86	2.80743	3.09717	24.86	1.7614	3.79755
24.88	2.72666	3.23963	24.88	1.76883	3.38332
24.9	2.78491	3.43599	24.9	1.74523	3.6356
24.92	2.84671	3.01601	24.92	1.7365	3.38322
24.94	2.95266	2.98438	24.94	1.82288	3.64958
24.96	2.97923	3.00943	24.96	1.82279	3.59001
24.98	3.20638	3.07535	24.98	1.85663	3.31922
25	3.08693	2.99868	25	1.791	3.69602
25.02	3.21622	3.34593	25.02	1.89485	3.5841
25.04	3.22766	3.02269	25.04	1.87278	3.56377
25.06	3.27813	3.30226	25.06	1.91348	3.35943
25.08	3.23115	3.33938	25.08	1.76423	3.82028
25.1	3.14373	2.91019	25.1	1.87673	3.7218
25.12	3.48339	2.76255	25.12	1.89197	3.31146
25.14	3.41512	2.75559	25.14	1.96763	3.47799
25.16	3.39188	2.76995	25.16	1.94098	3.53624
25.18	3.46939	3.02507	25.18	1.87817	3.23237
25.2	3.42201	3.06497	25.2	1.82858	3.40311
25.22	3.35056	2.45921	25.22	1.81964	3.40116
25.24	3.42379	1.9696	25.24	1.79652	3.49018
25.26	3.24048	3.01188	25.26	1.87786	3.46157
25.28	3.30228	3.17229	25.28	1.85283	3.72478
25.3	3.18459	2.81109	25.3	1.886	3.34885
25.32	3.3073	2.73174	25.32	1.80279	3.16932
25.34	3.41004	2.42747	25.34	1.82403	3.53067
25.36	3.65497	2.71298	25.36	1.75002	3.46303
25.38	3.60418	2.64861	25.38	1.78035	3.72771
25.4	3.50466	3.16221	25.4	1.77899	3.53636
25.42	3.55545	2.5987	25.42	1.82745	3.29278
25.44	3.61518	2.64303	25.44	1.85685	3.46652
25.46	3.43159	1.58078	25.46	1.89072	3.6337
25.48	3.33561	2.77389	25.48	1.87129	3.13307
25.5	3.67678	2.92727	25.5	1.85304	3.18596
25.52	3.6922	2.78339	25.52	1.78806	3.36025
25.54	3.72101	3.01701	25.54	1.94752	3.15408
25.56	3.86944	2.76114	25.56	1.89469	3.09432
25.58	3.84295	3.15554	25.58	1.83609	3.22683
25.6	3.77798	3.21178	25.6	1.83007	3.26326
25.62	3.71618	3.21744	25.62	1.82555	3.1697
25.64	3.54983	3.53462	25.64	1.91282	3.20111
25.66	3.66985	3.4761	25.66	1.97153	3.20184
25.68	3.65432	3.3611	25.68	1.92625	3.46829
25.7	3.74561	2.9673	25.7	1.9414	3.14143
25.72	3.77927	2.38964	25.72	1.99702	3.27985
25.74	3.68494	2.73601	25.74	2.07853	3.00766
25.76	3.59438	2.99948	25.76	1.96963	2.96263
25.78	3.6232	3.30285	25.78	1.96374	2.98335
25.8	3.54075	3.33091	25.8	1.90289	3.16635
25.82	3.45339	3.08423	25.82	1.91324	3.32775
25.84	3.40849	2.99782	25.84	1.86569	3.50363
25.86	3.36186	3.26578	25.86	1.87795	3.12997
25.88	3.35147	3.14675	25.88	1.84309	3.07806
25.9	3.32942	3.40018	25.9	1.96141	3.0745
25.92	3.33535	3.19953	25.92	1.94632	3.16834
25.94	3.32376	2.78364	25.94	1.94698	3.16155
25.96	3.427	2.99612	25.96	1.95523	3.27213
25.98	3.32828	3.25636	25.98	1.98089	3.20585
26	3.29517	3.39422	26	2.03315	3.63315
26.02	3.39002	2.917	26.02	2.07385	3.93623
26.04	3.42348	3.04775	26.04	2.05993	3.80763
26.06	3.38081	2.6586	26.06	1.98861	3.83976
26.08	3.37075	2.59906	26.08	1.97113	3.66238
26.1	3.43427	2.76116	26.1	1.97712	3.64231
26.12	3.40994	2.75962	26.12	1.99341	3.64791
26.14	3.50717	2.74005	26.14	2.06688	3.64024
26.16	3.39805	2.67049	26.16	1.97051	3.89616
26.18	3.47098	2.85672	26.18	2.06254	3.58517
26.2	3.547	2.98732	26.2	2.00547	3.88068
26.22	3.50177	2.95488	26.22	2.02174	4.00612
26.24	3.53326	3.13972	26.24	1.98765	3.88866
26.26	3.48623	2.57135	26.26	1.94806	3.97972
26.28	3.4953	2.92061	26.28	1.99007	3.76431
26.3	3.42552	2.82143	26.3	1.98608	3.7546
26.32	3.46462	2.5381	26.32	2.01702	3.59886
26.34	3.44693	2.89125	26.34	1.93141	3.60749
26.36	3.35697	2.95309	26.36	1.90333	3.60544
26.38	3.3465	3.29086	26.38	1.97624	3.62614
26.4	3.5293	3.253	26.4	1.89617	3.74354
26.42	3.46703	2.91621	26.42	1.93971	3.89704
26.44	3.60116	3.03095	26.44	1.92049	3.87244
26.46	3.45035	2.85701	26.46	1.96097	3.79845
26.48	3.4731	2.82717	26.48	2.0035	3.72579
26.5	3.46362	2.81687	26.5	1.9866	3.74445
26.52	3.50807	2.73667	26.52	2.03659	3.55866
26.54	3.46711	2.83886	26.54	2.01398	2.86237
26.56	3.37943	3.17075	26.56	1.89441	3.6568
26.58	3.20356	2.67205	26.58	1.85648	3.53182
26.6	3.23591	2.79244	26.6	1.8595	3.86754
26.62	3.39749	3.20902	26.62	1.87611	3.80691
26.64	3.38507	3.21622	26.64	1.93077	3.41928
26.66	3.40726	3.46866	26.66	1.90673	3.3627
26.68	3.26764	3.58042	26.68	1.97337	3.20018
26.7	3.35218	3.51314	26.7	2.01853	3.1188
26.72	3.38422	3.43921	26.72	1.81864	3.26539
26.74	3.49163	3.11122	26.74	1.87848	3.58211
26.76	3.45758	2.61012	26.76	1.94916	3.36692
26.78	3.24076	2.6806	26.78	1.79721	3.46588
26.8	3.32616	2.85537	26.8	1.74045	3.35637
26.82	3.29845	2.87817	26.82	1.93927	3.27284
26.84	3.34738	3.03561	26.84	1.91429	3.5179
26.86	3.3366	3.07598	26.86	2.00069	3.43964
26.88	3.42571	3.04832	26.88	1.88201	3.23008
26.9	3.377	3.23464	26.9	1.99776	3.16761
26.92	3.44832	2.86834	26.92	1.95742	3.41427
26.94	3.49393	3.02739	26.94	2.01601	3.22309
26.96	3.49355	2.99695	26.96	1.93676	3.55785
26.98	3.32938	2.82726	26.98	1.90419	3.69232
27	3.35295	2.8906	27	1.95548	3.47993
27.02	3.38725	3.00936	27.02	2.02544	3.02403
27.04	3.24883	2.91134	27.04	1.9787	3.03836
27.06	3.41279	3.04745	27.06	1.89885	3.14235
27.08	3.35261	3.17622	27.08	1.92883	3.06987
27.1	3.29209	3.15512	27.1	2.0232	3.17198
27.12	3.39945	2.80247	27.12	1.96792	3.33315
27.14	3.15944	2.72911	27.14	1.89	3.05736
27.16	3.27829	2.69228	27.16	2.00093	3.15841
27.18	3.45356	3.26745	27.18	2.01833	3.31534
27.2	3.44889	3.33591	27.2	2.01047	3.3297
27.22	3.40712	3.27668	27.22	1.93487	3.05532
27.24	3.3734	3.17377	27.24	1.93032	3.20302
27.26	3.39164	3.33553	27.26	1.93913	3.1412
27.28	3.27037	3.39943	27.28	1.93539	3.17831
27.3	3.20581	2.91647	27.3	1.96299	2.90916
27.32	3.37832	3.37963	27.32	1.92299	3.27708
27.34	3.30459	3.34626	27.34	1.95952	3.07919
27.36	3.55022	3.30165	27.36	1.94026	2.92298
27.38	3.60339	3.4058	27.38	1.94079	3.19468
27.4	3.49211	3.63184	27.4	2.0167	3.14048
27.42	3.4431	3.40705	27.42	1.95148	3.21652
27.44	3.44584	3.34376	27.44	1.93012	2.85043
27.46	3.42341	3.48414	27.46	2.00737	3.04958
27.48	3.3792	3.49797	27.48	2.09048	3.14076
27.5	3.42703	3.83592	27.5	2.00383	3.04812
27.52	3.3698	3.71229	27.52	2.02582	3.25831
27.54	3.32279	3.3588	27.54	1.83613	3.43999
27.56	3.27326	3.52231	27.56	1.9431	3.33111
27.58	3.17454	3.64343	27.58	1.89425	3.02259
27.6	3.18327	3.50887	27.6	1.97407	3.46506
27.62	3.37617	3.29012	27.62	2.0784	3.00665
27.64	3.38332	3.41428	27.64	2.01528	3.09783
27.66	3.33143	3.39984	27.66	1.96755	3.1749
27.68	3.46564	3.2222	27.68	2.07531	3.17027
27.7	3.49574	3.30022	27.7	2.00629	3.24165
27.72	3.3876	3.38223	27.72	1.95737	3.15239
27.74	3.57728	3.28113	27.74	1.92165	3.42265
27.76	3.39543	3.36979	27.76	1.96826	3.29575
27.78	3.23335	3.3957	27.78	1.91677	3.3875
27.8	3.23336	3.4793	27.8	1.92097	3.10208
27.82	3.42159	3.48098	27.82	1.97063	3.16531
27.84	3.19234	3.38205	27.84	2.04978	2.88978
27.86	3.25475	3.34348	27.86	1.94272	2.92506
27.88	3.15201	2.82689	27.88	2.03424	3.22147
27.9	3.24157	3.56984	27.9	1.99158	3.20042
27.92	3.20347	3.37229	27.92	2.00094	3.38817
27.94	3.12416	3.44938	27.94	2.10494	3.14024
27.96	3.26743	3.47938	27.96	2.11085	3.18956
27.98	3.32283	3.53987	27.98	2.00005	3.38742
28	3.24609	3.61888	28	2.01728	3.86202
28.02	3.159	3.25522	28.02	1.93575	3.03635
28.04	3.29878	3.54528	28.04	1.99133	3.19968
28.06	3.31872	3.28725	28.06	1.98347	2.73512
28.08	3.42946	3.38275	28.08	1.97816	3.19979
28.1	3.34882	3.47189	28.1	1.95543	3.1446
28.12	3.41253	3.35668	28.12	1.96951	3.32826
28.14	3.42965	3.42759	28.14	2.06999	3.37459
28.16	3.35372	3.35706	28.16	2.07431	3.13388
28.18	3.30894	3.34798	28.18	2.03092	3.2316
28.2	3.33185	3.47014	28.2	2.00764	3.36088
28.22	3.2076	3.3202	28.22	2.05398	3.04887
28.24	3.25891	3.34994	28.24	2.13768	3.32796
28.26	3.31103	3.6986	28.26	2.03807	3.27314
28.28	3.30186	3.49294	28.28	2.04431	3.27637
28.3	3.17364	3.46746	28.3	2.05957	3.49288
28.32	3.30522	3.42245	28.32	2.15381	3.0985
28.34	3.28445	3.46619	28.34	2.0643	3.10298
28.36	3.36643	3.39467	28.36	2.01175	3.02932
28.38	3.67256	3.62095	28.38	1.99228	3.20394
28.4	3.55143	3.62039	28.4	1.98032	3.33831
28.42	3.57614	3.44353	28.42	2.08677	3.10757
28.44	3.6085	3.56856	28.44	2.05734	3.12918
28.46	3.55221	3.52869	28.46	2.00889	3.54795
28.48	3.67569	3.62046	28.48	1.95848	3.45196
28.5	3.75984	3.51059	28.5	1.96598	3.53136
28.52	3.73234	3.3239	28.52	2.0172	3.71572
28.54	3.60366	2.99914	28.54	2.03262	3.55934
28.56	3.66138	2.9144	28.56	2.09963	3.66284
28.58	3.53857	3.03899	28.58	2.03664	3.50016
28.6	3.51706	3.21989	28.6	2.03275	3.57011
28.62	3.5816	3.35666	28.62	1.92876	3.51747
28.64	3.58219	3.47324	28.64	1.99563	3.68058
28.66	3.71018	3.86098	28.66	1.96028	3.94956
28.68	3.67133	3.55826	28.68	1.91345	3.78045
28.7	3.68237	3.55471	28.7	2.03482	3.79344
28.72	3.52179	3.45157	28.72	1.92662	3.33177
28.74	3.49727	3.40585	28.74	1.9679	3.56819
28.76	3.33714	3.57492	28.76	1.99589	3.39644
28.78	3.31736	3.43713	28.78	1.97243	3.93646
28.8	3.19128	3.38177	28.8	1.92706	3.43899
28.82	3.17358	3.33721	28.82	1.97102	3.74824
28.84	3.37689	3.10272	28.84	2.0036	3.4042
28.86	3.37617	3.51946	28.86	1.99784	3.60098
28.88	3.29621	3.35182	28.88	1.89572	3.46174
28.9	3.3583	3.23626	28.9	1.86175	3.79942
28.92	3.29425	2.96353	28.92	1.99408	3.56438
28.94	3.24615	3.11468	28.94	1.93041	3.64261
28.96	3.19956	3.30631	28.96	1.89461	3.65869
28.98	3.27118	3.22944	28.98	1.96224	3.28903
29	3.06042	3.03067	29	1.95054	2.93614
29.02	3.04028	3.05191	29.02	1.95432	3.38276
29.04	3.05641	3.09066	29.04	1.93522	3.02024
29.06	3.13363	3.12559	29.06	2.03573	3.21884
29.08	3.12771	3.43727	29.08	2.10016	2.95151
29.1	3.12615	3.16535	29.1	2.08032	3.52262
29.12	3.05887	3.44087	29.12	1.96937	3.65971
29.14	3.03137	3.56815	29.14	1.98363	3.40616
29.16	3.18263	3.20201	29.16	1.94142	3.42318
29.18	3.07394	3.33844	29.18	1.87584	3.23619
29.2	3.05393	3.38628	29.2	1.99505	3.31749
29.22	3.11717	3.34427	29.22	1.97905	3.24402
29.24	3.04584	3.47468	29.24	1.93388	3.29208
29.26	2.95755	3.32315	29.26	2.01513	3.34431
29.28	2.97196	3.46849	29.28	1.9924	3.33999
29.3	3.21495	3.19616	29.3	1.95768	3.46693
29.32	3.06369	3.40756	29.32	1.9548	3.17335
29.34	3.08037	3.50382	29.34	1.99484	3.51999
29.36	3.10938	3.22008	29.36	1.99122	3.03525
29.38	3.20038	3.36659	29.38	1.9859	3.23662
29.4	3.16645	3.46456	29.4	1.9425	3.13214
29.42	3.14817	3.18339	29.42	1.96806	3.14064
29.44	3.18665	3.16819	29.44	2.05967	3.14516
29.46	3.21906	3.09187	29.46	2.00402	3.08234
29.48	3.22421	2.97458	29.48	1.93052	3.13158
29.5	3.20887	3.53228	29.5	2.03352	3.21082
29.52	3.1909	3.37302	29.52	1.93643	3.43464
29.54	3.21672	3.24007	29.54	1.95827	3.35282
29.56	3.30973	3.32706	29.56	1.9331	3.31534
29.58	3.24805	3.39831	29.58	1.93917	3.4512
29.6	3.11459	3.23721	29.6	1.90599	3.34891
29.62	3.02944	3.32634	29.62	1.89234	3.25276
29.64	3.08687	3.2408	29.64	1.85352	3.16579
29.66	3.11091	3.20579	29.66	1.93452	3.1471
29.68	3.13318	3.32471	29.68	1.9126	3.21799
29.7	3.12458	3.33861	29.7	2.00942	3.1221
29.72	3.18582	3.12279	29.72	1.95145	3.2509
29.74	3.13101	3.34117	29.74	1.97005	3.22731
29.76	3.12155	3.32856	29.76	1.91046	3.11025
29.78	3.22195	3.34478	29.78	1.92712	3.17247
29.8	3.1482	3.39079	29.8	2.0028	3.28757
29.82	3.18099	3.44927	29.82	1.96915	3.20147
29.84	3.06984	3.17585	29.84	1.9954	3.48366
29.86	3.04459	3.36556	29.86	1.98618	3.39342
29.88	3.06222	3.0383	29.88	1.9397	3.7834
29.9	3.07642	3.0193	29.9	1.96955	3.86099
29.92	3.0798	3.33948	29.92	2.12343	3.80209
29.94	3.11965	3.29938	29.94	1.97619	3.75662
29.96	3.22881	3.1094	29.96	1.99312	3.3486
29.98	3.12796	3.21175	29.98	2.10899	3.16831
30	3.15431	3.27432	30	1.98283	3.19798
30.02	3.13907	3.26828	30.02	2.01797	3.35322
30.04	3.18112	3.38498	30.04	2.03098	3.23449
30.06	3.14118	3.53672	30.06	2.06191	3.45594
30.08	3.22165	3.36684	30.08	2.01869	3.45103
30.1	3.17513	3.08812	30.1	1.96631	3.14009
30.12	3.2234	3.29468	30.12	1.93925	3.27552
30.14	3.3278	3.42089	30.14	2.04847	3.27369
30.16	3.13008	3.4696	30.16	2.06056	3.4572
30.18	3.13069	3.44388	30.18	1.97201	3.06454
30.2	3.22494	3.35189	30.2	2.10057	3.04211
30.22	3.14519	3.26581	30.22	2.04523	3.32132
30.24	3.2385	3.37376	30.24	2.05932	2.96711
30.26	3.15342	3.47641	30.26	1.97568	3.14863
30.28	3.26884	3.43526	30.28	2.12508	3.16027
30.3	3.20843	3.46481	30.3	2.07267	2.99755
30.32	3.29695	3.50535	30.32	2.0353	2.9195
30.34	3.27978	3.71861	30.34	2.00638	3.29523
30.36	3.28929	3.48458	30.36	2.07892	3.32255
30.38	3.30942	3.50336	30.38	2.08773	3.18019
30.4	3.2682	3.1327	30.4	2.09476	3.26397
30.42	3.39243	3.03767	30.42	2.03248	3.18962
30.44	3.24958	2.81912	30.44	2.02991	3.30704
30.46	3.28073	2.751	30.46	2.03759	3.4937
30.48	3.35537	2.70584	30.48	2.06256	3.33237
30.5	3.22695	2.80102	30.5	1.94616	3.30909
30.52	3.24102	2.85207	30.52	2.00766	3.32021
30.54	3.26388	3.00147	30.54	2.01337	3.14663
30.56	3.22029	3.16776	30.56	1.95923	3.03186
30.58	3.38974	3.00786	30.58	2.06309	3.0689
30.6	3.37909	2.95814	30.6	2.02647	2.85604
30.62	3.29082	2.60762	30.62	1.90572	2.90235
30.64	3.30504	3.06086	30.64	1.95956	2.96676
30.66	3.2462	3.11402	30.66	1.92899	3.002
30.68	3.15478	3.38243	30.68	2.02911	3.07915
30.7	3.29381	3.14128	30.7	1.96517	3.25421
30.72	3.23208	3.19539	30.72	1.99503	2.88672
30.74	3.16902	3.12484	30.74	1.96966	3.1762
30.76	3.24486	2.94076	30.76	2.07253	3.02808
30.78	3.2797	2.67523	30.78	1.9471	3.27478
30.8	3.2825	2.61279	30.8	1.97312	2.87271
30.82	3.26784	2.51317	30.82	1.92384	3.15349
30.84	3.32877	2.73895	30.84	1.95685	2.75078
30.86	3.30283	3.0075	30.86	2.01279	3.12762
30.88	3.23066	2.94391	30.88	2.04673	2.65735
30.9	3.27762	2.73187	30.9	2.04169	2.81738
30.92	3.26868	3.23784	30.92	2.00759	3.04055
30.94	3.26858	2.85222	30.94	1.99815	3.17764
30.96	3.17171	2.87876	30.96	2.04826	2.90304
30.98	3.30101	2.70107	30.98	1.92369	3.14915
31	3.34555	2.94809	31	1.96831	3.13271
31.02	3.30789	2.98795	31.02	2.02631	2.95942
31.04	3.40582	3.33294	31.04	1.98906	3.16854
31.06	3.44308	3.00924	31.06	1.93856	3.05148
31.08	3.54479	2.86154	31.08	1.91817	3.19072
31.1	3.45714	2.89308	31.1	1.9244	3.19435
31.12	3.43237	3.27267	31.12	2.10763	3.21672
31.14	3.50378	2.99765	31.14	2.10294	2.98628
31.16	3.40187	2.69185	31.16	2.11317	2.98204
31.18	3.42512	3.36525	31.18	2.0236	3.01899
31.2	3.43831	3.2956	31.2	2.02585	3.06719
31.22	3.48702	3.31974	31.22	1.95044	3.13944
31.24	3.36464	3.59146	31.24	2.00492	3.01803
31.26	3.53631	3.06694	31.26	1.89604	3.06631
31.28	3.38618	3.48661	31.28	1.89466	3.32711
31.3	3.32759	2.75821	31.3	1.92278	2.45473
31.32	3.36834	3.82704	31.32	1.95926	3.25814
31.34	3.37339	3.32599	31.34	1.94962	3.20576
31.36	3.5201	3.67067	31.36	1.90091	3.15293
31.38	3.51799	2.9429	31.38	1.91612	3.09468
31.4	3.42436	3.12809	31.4	2.0739	3.22755
31.42	3.36016	3.13388	31.42	2.02456	3.01455
31.44	3.40559	2.82052	31.44	2.00084	2.8686
31.46	3.50761	3.04685	31.46	2.03445	3.14118
31.48	3.45163	3.1296	31.48	1.99721	2.81348
31.5	3.63672	3.17969	31.5	2.09761	2.97685
31.52	3.57396	3.3392	31.52	2.05155	2.96147
31.54	3.60412	2.74594	31.54	2.01434	2.93911
31.56	3.5595	3.17948	31.56	1.95655	3.33466
31.58	3.49623	3.49533	31.58	2.03962	3.12751
31.6	3.4077	2.90033	31.6	1.91464	3.35351
31.62	3.4009	3.07191	31.62	2.07715	3.42166
31.64	3.46832	3.15279	31.64	1.88725	3.09471
31.66	3.41367	2.79698	31.66	1.96089	3.04711
31.68	3.39716	2.90023	31.68	1.979	2.99975
31.7	3.4392	3.0745	31.7	1.93916	3.21408
31.72	3.50799	2.90047	31.72	2.02669	3.01693
31.74	3.42751	3.03347	31.74	2.0678	3.18885
31.76	3.33358	2.73728	31.76	2.01826	2.93626
31.78	3.45849	2.82827	31.78	2.0698	2.8128
31.8	3.46128	2.44242	31.8	2.09072	3.14722
31.82	3.54877	2.62257	31.82	1.99476	3.19698
31.84	3.5142	2.85086	31.84	2.02059	3.33771
31.86	3.55286	2.67005	31.86	1.9537	3.24013
31.88	3.62805	2.67462	31.88	2.12181	2.84461
31.9	3.68853	3.25536	31.9	2.0277	3.18669
31.92	3.6784	2.71034	31.92	1.98632	3.30624
31.94	3.4905	2.19069	31.94	1.96103	3.1293
31.96	3.65216	2.94641	31.96	2.01179	2.81448
31.98	3.59431	2.96072	31.98	2.01474	3.18784
32	3.56249	2.58613	32	2.00603	3.22182
32.02	3.60083	2.44535	32.02	2.0993	3.09423
32.04	3.51679	2.16221	32.04	2.05935	3.52991
32.06	3.45402	2.58442	32.06	2.01112	3.67993
32.08	3.45521	2.5566	32.08	2.00952	3.38041
32.1	3.42123	2.72936	32.1	1.92557	3.63705
32.12	3.43487	2.9467	32.12	2.00272	3.00372
32.14	3.40582	2.85221	32.14	1.97264	3.24685
32.16	3.41782	2.21187	32.16	2.07284	2.77806
32.18	3.47313	2.9328	32.18	2.01977	3.30585
32.2	3.42334	3.18104	32.2	1.96465	3.46387
32.22	3.46463	2.67608	32.22	2.14518	3.88654
32.24	3.52676	3.02959	32.24	2.0962	3.78631
32.26	3.50585	2.78911	32.26	2.04607	3.69543
32.28	3.44388	3.13881	32.28	2.12997	3.60222
32.3	3.54577	3.23421	32.3	2.13998	3.61665
32.32	3.53923	3.11858	32.32	2.10299	3.54156
32.34	3.52811	2.76048	32.34	1.96034	3.58934
32.36	3.54575	3.26824	32.36	2.1099	3.45795
32.38	3.50215	3.42166	32.38	2.08173	3.7761
32.4	3.73729	3.22169	32.4	2.08474	3.69858
32.42	3.59872	3.13178	32.42	2.03712	3.76922
32.44	3.66847	3.31194	32.44	2.09308	3.84899
32.46	3.61239	3.81619	32.46	1.9769	3.6645
32.48	3.4568	3.6144	32.48	2.07408	3.54615
32.5	3.50977	3.65048	32.5	2.04913	3.75447
32.52	3.57066	3.93675	32.52	1.98875	3.74284
32.54	3.73164	3.69547	32.54	1.99735	3.82887
32.56	3.74932	3.56674	32.56	1.95976	3.66171
32.58	3.87698	3.66772	32.58	1.96475	3.87101
32.6	3.80695	3.70614	32.6	2.09526	3.71308
32.62	3.78614	3.42945	32.62	1.96331	3.23751
32.64	3.83996	3.5686	32.64	1.92116	3.54026
32.66	3.75166	3.64721	32.66	1.9377	3.59847
32.68	3.86478	3.57532	32.68	2.0349	3.89302
32.7	3.75225	3.45726	32.7	1.99886	3.76128
32.72	3.74711	3.7465	32.72	2.03739	3.74451
32.74	3.70693	3.54763	32.74	2.03448	3.60433
32.76	3.77592	3.24889	32.76	1.92171	3.65894
32.78	3.8029	3.2645	32.78	2.02332	3.11371
32.8	3.79001	3.1991	32.8	2.00581	3.32503
32.82	3.68189	3.34523	32.82	2.04179	3.46466
32.84	3.6431	3.4535	32.84	1.99837	3.74464
32.86	3.68344	3.29579	32.86	1.9541	3.45287
32.88	3.76945	3.66952	32.88	1.9895	3.05692
32.9	3.59036	3.60495	32.9	1.99206	3.11461
32.92	3.65694	3.38523	32.92	1.96526	2.99664
32.94	3.67935	3.29551	32.94	2.09241	3.31428
32.96	3.68516	3.22884	32.96	2.09513	2.83902
32.98	3.66936	3.31727	32.98	2.01208	3.06223
33	3.66152	2.89274	33	2.0108	3.04075
33.02	3.71846	3.26599	33.02	1.95113	3.24514
33.04	3.6705	3.41863	33.04	1.9563	3.48841
33.06	3.69908	3.27339	33.06	1.99873	3.71203
33.08	3.78568	3.17479	33.08	1.95346	3.8287
33.1	3.65955	3.1113	33.1	1.97033	3.39472
33.12	3.67785	3.12007	33.12	2.02319	3.62331
33.14	3.76244	2.92948	33.14	2.09421	3.14075
33.16	3.74967	2.9115	33.16	2.06001	3.1746
33.18	3.75537	2.84933	33.18	2.04835	3.29397
33.2	3.68241	3.06913	33.2	1.92581	3.35983
33.22	3.72113	2.90682	33.22	1.99217	3.44406
33.24	3.72857	2.81155	33.24	1.98312	3.39121
33.26	3.76881	3.07516	33.26	1.96513	3.61828
33.28	3.75424	3.12958	33.28	2.04918	3.78227
33.3	3.74859	3.49173	33.3	1.94683	3.90278
33.32	3.71895	3.49782	33.32	2.03289	3.44417
33.34	3.66154	3.2913	33.34	2.06506	3.11292
33.36	3.76446	3.40973	33.36	1.93118	3.2503
33.38	3.73059	3.28026	33.38	1.98919	3.62017
33.4	3.65787	3.53425	33.4	1.95471	3.74017
33.42	3.55288	3.38639	33.42	1.96624	3.45606
33.44	3.52368	2.81011	33.44	1.97422	3.3691
33.46	3.57312	3.0209	33.46	1.95922	3.22761
33.48	3.57334	2.88903	33.48	1.94815	3.34799
33.5	3.57992	2.72924	33.5	1.99198	3.23002
33.52	3.6016	3.02404	33.52	2.03637	2.71205
33.54	3.51939	2.88084	33.54	2.04681	3.17475
33.56	3.53139	2.8147	33.56	2.02682	3.25337
33.58	3.61497	2.95784	33.58	1.92005	3.12018
33.6	3.6254	3.00962	33.6	2.05863	2.82273
33.62	3.63598	2.73659	33.62	2.05809	3.06523
33.64	3.59443	2.74041	33.64	2.0524	2.89454
33.66	3.54904	3.12157	33.66	2.08577	3.57608
33.68	3.80533	3.48587	33.68	2.08708	3.50353
33.7	3.61218	3.35312	33.7	2.04824	3.16955
33.72	3.55444	3.2446	33.72	2.00833	3.19882
33.74	3.66513	2.96556	33.74	1.95668	3.76091
33.76	3.63729	2.88607	33.76	1.99962	3.23347
33.78	3.78429	2.77607	33.78	1.97984	3.30502
33.8	3.8519	3.1112	33.8	1.97317	3.17173
33.82	3.75993	3.01501	33.82	1.95304	3.24792
33.84	3.67553	2.88651	33.84	1.97183	3.71483
33.86	3.72345	2.94726	33.86	1.97676	3.74218
33.88	3.49596	3.00288	33.88	1.98382	3.60532
33.9	3.63777	2.92455	33.9	2.12454	3.63992
33.92	3.69355	2.71952	33.92	2.01491	3.55872
33.94	3.66675	2.62024	33.94	1.9771	3.46019
33.96	3.57369	2.93085	33.96	1.9813	3.40753
33.98	3.67276	2.80929	33.98	1.98473	3.59237
34	3.56654	2.77617	34	1.97323	3.50457
34.02	3.83695	2.88491	34.02	1.91878	3.47542
34.04	3.65714	2.89521	34.04	1.90267	3.57294
34.06	3.77625	3.05068	34.06	1.91316	3.63846
34.08	3.83666	2.64372	34.08	1.92954	3.39469
34.1	3.82623	2.99673	34.1	1.98217	3.05527
34.12	3.7388	2.80091	34.12	1.97992	3.27769
34.14	3.89405	2.87987	34.14	1.97764	2.90097
34.16	3.81047	2.97199	34.16	2.07794	3.54147
34.18	3.65901	2.91174	34.18	2.07161	3.61256
34.2	3.56442	3.01492	34.2	2.09706	3.6558
34.22	3.70396	2.79036	34.22	2.07895	3.82615
34.24	3.6734	2.85593	34.24	2.07921	3.70139
34.26	3.59912	2.69126	34.26	2.00947	3.85355
34.28	3.37269	2.66094	34.28	2.02466	3.82181
34.3	3.42801	2.65321	34.3	2.0185	3.71877
34.32	3.56006	3.00679	34.32	2.03055	3.56844
34.34	3.53851	2.8355	34.34	2.05535	3.5038
34.36	3.43552	2.83726	34.36	2.0259	3.80249
34.38	3.51105	2.95901	34.38	2.07171	3.55162
34.4	3.58926	2.88682	34.4	1.95231	3.18529
34.42	3.64287	2.68143	34.42	2.00174	3.3104
34.44	3.63156	2.73412	34.44	1.93812	3.54613
34.46	3.51736	2.88696	34.46	2.01141	3.91291
34.48	3.65667	2.64593	34.48	2.01025	3.7875
34.5	3.65233	3.12422	34.5	2.0501	3.69807
34.52	3.45457	3.11525	34.52	1.98919	3.64505
34.54	3.5327	3.17793	34.54	1.96558	3.2786
34.56	3.46933	3.03686	34.56	1.97898	3.42304
34.58	3.49176	2.91719	34.58	2.02722	3.17139
34.6	3.4835	3.28071	34.6	1.88604	3.34402
34.62	3.49449	3.40229	34.62	1.95035	2.91598
34.64	3.4093	3.08754	34.64	1.95789	2.97416
34.66	3.66977	3.02333	34.66	1.97804	3.20942
34.68	3.65401	2.79504	34.68	2.03881	3.00716
34.7	3.55808	3.41434	34.7	2.03206	3.26479
34.72	3.53737	3.33975	34.72	2.03248	2.99919
34.74	3.65393	3.37085	34.74	1.99922	3.09801
34.76	3.61564	3.682	34.76	2.00326	3.16017
34.78	3.55659	3.47174	34.78	2.05942	3.1402
34.8	3.68937	3.48513	34.8	1.91134	3.20176
34.82	3.69306	3.38919	34.82	1.93289	3.90261
34.84	3.4841	3.57482	34.84	1.93939	3.96684
34.86	3.51974	3.19439	34.86	1.95625	3.83102
34.88	3.5838	3.56106	34.88	2.0366	3.5777
34.9	3.58515	3.58248	34.9	1.9658	3.64723
34.92	3.45907	3.50431	34.92	1.92577	3.54807
34.94	3.43437	3.48015	34.94	1.97999	3.65366
34.96	3.48227	3.44719	34.96	2.01696	3.34979
34.98	3.45243	3.55869	34.98	1.95467	3.62126
35	3.43311	3.37458	35	2.04704	3.46764
35.02	3.50016	3.3717	35.02	2.03095	3.72822
35.04	3.49049	3.62922	35.04	1.99376	3.48566
35.06	3.48355	3.47104	35.06	1.93293	3.59236
35.08	3.39834	3.57243	35.08	2.00076	3.06581
35.1	3.41922	3.7251	35.1	2.004	3.22051
35.12	3.45352	3.61455	35.12	1.954	3.41129
35.14	3.4388	3.5664	35.14	1.91224	3.44729
35.16	3.64486	3.51239	35.16	1.97969	3.67799
35.18	3.53976	3.27287	35.18	1.90696	3.82188
35.2	3.62435	3.07471	35.2	1.92946	3.5831
35.22	3.53213	3.32908	35.22	1.85935	3.48382
35.24	3.50841	3.41217	35.24	1.89527	3.59681
35.26	3.39708	3.04482	35.26	1.81041	3.14909
35.28	3.41815	3.67845	35.28	1.82417	3.58259
35.3	3.52554	3.21015	35.3	1.92865	3.37745
35.32	3.59636	3.35323	35.32	1.85959	3.36102
35.34	3.50108	3.12522	35.34	1.92057	3.12938
35.36	3.45232	3.50261	35.36	2.05763	3.13882
35.38	3.65545	3.32956	35.38	1.91663	3.5282
35.4	3.67346	3.46672	35.4	1.88892	3.40078
35.42	3.62979	3.32122	35.42	1.99363	3.38121
35.44	3.54659	3.43895	35.44	1.9121	3.1237
35.46	3.58554	3.6463	35.46	1.93513	3.37198
35.48	3.47472	3.48285	35.48	1.97663	3.16465
35.5	3.54347	3.59167	35.5	1.97798	3.2686
35.52	3.48993	3.37268	35.52	1.92055	3.49538
35.54	3.65643	3.44615	35.54	1.97802	3.59639
35.56	3.52289	3.4425	35.56	1.88152	3.66646
35.58	3.68377	3.04509	35.58	1.92321	3.21522
35.6	3.60571	3.14319	35.6	2.01822	3.51381
35.62	3.74287	2.75087	35.62	2.03888	3.30464
35.64	3.60864	2.9413	35.64	2.05887	3.11195
35.66	3.66384	2.87404	35.66	2.02456	3.4307
35.68	3.55968	2.71888	35.68	1.98567	3.35161
35.7	3.59064	3.04231	35.7	1.9953	3.4807
35.72	3.59651	2.99689	35.72	1.94227	3.33698
35.74	3.56566	2.97483	35.74	1.96295	3.55489
35.76	3.55269	3.12948	35.76	1.94174	2.88017
35.78	3.78243	3.14698	35.78	1.94979	2.64548
35.8	3.65711	3.24949	35.8	1.96524	3.03524
35.82	3.78277	3.58501	35.82	1.93883	3.27103
35.84	3.76673	3.51701	35.84	1.97385	3.49107
35.86	3.73812	3.32227	35.86	1.94662	3.43881
35.88	3.77091	3.51379	35.88	1.97789	3.43265
35.9	3.93005	3.64422	35.9	1.93572	3.43526
35.92	3.93744	3.39186	35.92	1.93079	3.10239
35.94	3.7023	3.49532	35.94	1.99092	3.22239
35.96	3.92817	3.07039	35.96	1.94836	3.27848
35.98	3.70873	2.94262	35.98	1.92111	3.54309
36	3.73478	2.62355	36	1.93304	3.21067
36.02	3.55587	3.43042	36.02	1.94737	3.5679
36.04	3.62718	3.51758	36.04	1.91891	3.46241
36.06	3.63941	3.60996	36.06	1.85486	3.36815
36.08	3.52413	3.4648	36.08	1.86767	3.22817
36.1	3.54619	3.80606	36.1	1.81069	3.69501
36.12	3.74613	3.20985	36.12	1.86282	3.75077
36.14	3.68963	3.29847	36.14	1.82922	3.9333
36.16	3.73847	3.31672	36.16	1.82653	3.66231
36.18	3.89546	3.4078	36.18	1.95417	3.89984
36.2	3.70831	3.4054	36.2	1.93144	3.88083
36.22	3.81898	3.61159	36.22	1.8994	3.94062
36.24	3.75291	3.39953	36.24	1.80453	3.56373
36.26	3.66855	3.24568	36.26	1.79665	3.67622
36.28	3.69103	3.10424	36.28	1.78419	3.80116
36.3	3.63428	3.60296	36.3	1.86765	3.93903
36.32	3.6597	3.45981	36.32	1.80706	3.82195
36.34	3.45872	3.45176	36.34	1.81499	3.84435
36.36	3.52309	3.53656	36.36	1.74596	3.65326
36.38	3.48773	3.54579	36.38	1.87508	3.625
36.4	3.57402	3.45928	36.4	1.90526	3.68654
36.42	3.62856	3.40712	36.42	1.91956	3.71045
36.44	3.69797	3.38459	36.44	1.90235	3.68486
36.46	3.59259	3.45511	36.46	1.84388	3.52227
36.48	3.62255	3.5636	36.48	1.9396	3.83465
36.5	3.68472	3.62804	36.5	1.97425	3.54477
36.52	3.53145	3.50972	36.52	1.9038	3.80769
36.54	3.59376	3.14526	36.54	1.91209	3.62151
36.56	3.62252	3.07464	36.56	1.92269	3.20426
36.58	3.5014	3.00465	36.58	1.937	3.40413
36.6	3.49208	3.57865	36.6	1.90825	3.42198
36.62	3.55042	3.46916	36.62	1.95096	3.28265
36.64	3.67627	3.42964	36.64	2.06346	3.25277
36.66	3.70067	2.87348	36.66	2.01794	3.06105
36.68	3.65796	2.80523	36.68	1.9181	2.972
36.7	3.67219	3.18077	36.7	2.0281	3.06593
36.72	3.5866	3.45378	36.72	2.01567	3.16299
36.74	3.67215	2.99674	36.74	2.04051	2.90065
36.76	3.75201	3.22606	36.76	2.02635	3.12114
36.78	3.47477	3.01839	36.78	2.07581	3.10153
36.8	3.53313	3.10017	36.8	1.93174	3.1006
36.82	3.56326	3.07443	36.82	1.92764	3.2308
36.84	3.48477	3.01825	36.84	1.95032	3.18275
36.86	3.53364	3.25146	36.86	1.89078	2.85098
36.88	3.63488	3.27843	36.88	1.8982	3.17387
36.9	3.81194	3.07421	36.9	1.97983	3.03788
36.92	3.59009	3.42944	36.92	1.92436	3.12412
36.94	3.62389	3.33965	36.94	1.93261	3.16764
36.96	3.56652	3.18284	36.96	1.97347	3.02561
36.98	3.58734	3.55246	36.98	2.03438	3.34391
37	3.63902	3.7529	37	1.96685	3.18475
37.02	3.59187	3.35887	37.02	1.96629	3.17706
37.04	3.44359	3.34891	37.04	1.94538	3.20752
37.06	3.46479	3.52772	37.06	1.9053	3.23331
37.08	3.39895	3.52691	37.08	1.92883	3.11451
37.1	3.58697	3.40736	37.1	1.96763	3.15971
37.12	3.59373	3.28051	37.12	1.93423	3.00911
37.14	3.56989	3.39931	37.14	1.87118	2.95506
37.16	3.45178	3.4862	37.16	2.02706	2.97204
37.18	3.52752	3.48612	37.18	1.99298	3.36388
37.2	3.48256	3.48538	37.2	2.02109	3.24757
37.22	3.3767	3.47673	37.22	2.03087	3.31927
37.24	3.43245	3.63329	37.24	2.02602	3.1847
37.26	3.46431	3.3738	37.26	1.99302	3.11402
37.28	3.39105	3.63548	37.28	2.08229	2.99073
37.3	3.47774	3.23924	37.3	1.94058	3.10995
37.32	3.37441	3.08475	37.32	1.94221	3.09293
37.34	3.39322	3.36484	37.34	1.98927	2.98995
37.36	3.39936	3.46627	37.36	1.9484	2.9287
37.38	3.30752	3.32052	37.38	1.92642	3.41092
37.4	3.27795	3.35337	37.4	1.94279	3.13122
37.42	3.49433	3.1043	37.42	1.92937	3.14204
37.44	3.31559	3.53107	37.44	2.03532	3.08369
37.46	3.32056	3.15407	37.46	1.98877	3.19755
37.48	3.28458	3.14447	37.48	1.97937	3.22188
37.5	3.35062	3.73673	37.5	1.99237	2.87739
37.52	3.36843	3.17321	37.52	1.89863	2.95813
37.54	3.26064	3.25894	37.54	1.99766	3.15332
37.56	3.35853	3.29142	37.56	1.95258	3.05943
37.58	3.32815	3.42418	37.58	2.00304	3.13959
37.6	3.28612	3.6699	37.6	2.08201	3.02865
37.62	3.32379	3.38099	37.62	2.04662	2.79867
37.64	3.29814	3.55392	37.64	2.04909	3.1303
37.66	3.34673	3.69027	37.66	2.04236	3.02154
37.68	3.37383	2.99522	37.68	2.02398	3.19169
37.7	3.33246	3.13099	37.7	2.00071	3.09801
37.72	3.42591	3.44707	37.72	2.10574	3.19567
37.74	3.48574	3.31816	37.74	2.16352	3.18462
37.76	3.4457	3.33052	37.76	2.14797	3.20727
37.78	3.49809	3.21689	37.78	2.19397	3.23496
37.8	3.55142	3.32067	37.8	2.1544	3.12327
37.82	3.58399	3.55623	37.82	2.01939	3.0451
37.84	3.46271	3.52107	37.84	2.04311	3.0287
37.86	3.58016	3.30888	37.86	2.18017	2.96003
37.88	3.53944	3.09424	37.88	2.10618	3.35703
37.9	3.41525	3.58507	37.9	2.05478	3.38573
37.92	3.34203	3.5039	37.92	2.08148	3.34522
37.94	3.47524	3.56401	37.94	2.19877	3.27438
37.96	3.50933	3.43675	37.96	2.08809	3.30095
37.98	3.4384	3.36419	37.98	2.12415	3.2279
38	3.30982	3.52639	38	2.06975	3.16216
38.02	3.3178	3.26012	38.02	2.06689	3.36955
38.04	3.4591	3.41069	38.04	2.02374	3.15685
38.06	3.44009	3.47789	38.06	2.12255	3.16426
38.08	3.41027	3.45717	38.08	2.06473	3.2985
38.1	3.44273	3.30985	38.1	2.06437	3.27987
38.12	3.36245	3.22809	38.12	2.05198	3.23224
38.14	3.37424	3.63256	38.14	2.03241	3.11294
38.16	3.27516	3.24434	38.16	2.04687	3.09685
38.18	3.26149	3.51315	38.18	2.06462	3.29758
38.2	3.21453	3.65541	38.2	2.03101	3.26265
38.22	3.35863	3.35666	38.22	2.062	3.22642
38.24	3.41562	3.21998	38.24	1.95506	3.18035
38.26	3.338	3.54612	38.26	2.02399	3.05461
38.28	3.3787	3.51502	38.28	2.14007	3.23856
38.3	3.42717	3.46861	38.3	2.00329	3.18003
38.32	3.36795	3.59127	38.32	2.00488	2.99752
38.34	3.42373	3.47383	38.34	1.87341	3.33042
38.36	3.58342	3.55879	38.36	1.93352	3.26933
38.38	3.46163	3.28284	38.38	2.07696	3.22331
38.4	3.43386	3.35053	38.4	1.97986	3.14042
38.42	3.40499	3.12239	38.42	2.06194	3.12132
38.44	3.3084	3.63922	38.44	2.03254	3.42985
38.46	3.19521	3.72446	38.46	2.02672	3.24453
38.48	3.23918	3.62872	38.48	2.10828	3.2567
38.5	3.28049	3.77177	38.5	2.09321	2.90584
38.52	3.30585	3.64672	38.52	2.0946	2.9501
38.54	3.12615	3.80277	38.54	2.03404	3.36535
38.56	3.24891	3.75892	38.56	2.07034	3.10447
38.58	3.41878	3.72137	38.58	1.97582	3.1202
38.6	3.46528	3.92178	38.6	1.94394	2.95139
38.62	3.47677	3.51364	38.62	1.91344	3.13277
38.64	3.41966	3.59813	38.64	1.8723	3.40657
38.66	3.34703	3.96072	38.66	1.93668	3.03266
38.68	3.38102	3.7013	38.68	1.90404	2.87431
38.7	3.35459	3.68711	38.7	1.88056	3.11292
38.72	3.20511	3.69108	38.72	1.93841	3.19321
38.74	3.15945	3.19915	38.74	2.07085	3.23528
38.76	3.35587	3.29235	38.76	2.01203	3.14372
38.78	3.3951	3.15159	38.78	2.07987	2.95288
38.8	3.45916	3.01762	38.8	2.09853	3.08838
38.82	3.42576	3.04901	38.82	1.98958	2.87156
38.84	3.32242	3.01425	38.84	2.01847	2.62362
38.86	3.45914	2.95021	38.86	1.93869	3.17575
38.88	3.46834	3.25509	38.88	2.09399	2.90361
38.9	3.48979	3.22706	38.9	2.07441	3.47696
38.92	3.45239	3.09358	38.92	2.10248	3.24042
38.94	3.6006	2.84402	38.94	2.05204	3.02605
38.96	3.46566	3.00432	38.96	1.95315	2.94898
38.98	3.5206	3.03134	38.98	1.97292	2.77582
39	3.48753	2.92909	39	2.16965	3.14955
39.02	3.65039	2.89448	39.02	2.16546	3.03419
39.04	3.63834	2.88098	39.04	2.06993	2.84261
39.06	3.69469	3.1401	39.06	2.01018	3.06702
39.08	3.71458	3.01866	39.08	2.02709	3.25454
39.1	3.67456	3.10255	39.1	2.22976	3.07062
39.12	3.68816	3.01164	39.12	2.08412	3.07636
39.14	3.64946	2.85412	39.14	2.02012	3.03974
39.16	3.69971	3.1019	39.16	2.09286	2.96453
39.18	3.55393	3.15603	39.18	2.13711	3.19933
39.2	3.65964	3.02865	39.2	2.13968	3.04849
39.22	3.57935	3.18761	39.22	1.96871	3.07415
39.24	3.59521	2.92105	39.24	2.07201	3.26653
39.26	3.68072	2.94474	39.26	2.02805	3.19765
39.28	3.65715	2.75446	39.28	2.09703	3.30553
39.3	3.54431	3.14896	39.3	2.04736	3.3924
39.32	3.63274	2.77923	39.32	2.13871	3.24802
39.34	3.43908	3.1069	39.34	2.13842	3.22009
39.36	3.32263	3.15694	39.36	2.0838	3.19097
39.38	3.39039	3.25978	39.38	2.11545	3.14402
39.4	3.53497	3.1889	39.4	2.05877	3.18636
39.42	3.57961	3.23322	39.42	1.98318	3.11327
39.44	3.64987	3.20107	39.44	2.18692	3.07371
39.46	3.66383	3.22211	39.46	2.11757	3.36801
39.48	3.6463	3.1698	39.48	2.10929	3.03945
39.5	3.72342	3.24098	39.5	2.07675	3.10278
39.52	3.55962	3.07897	39.52	2.10369	3.43706
39.54	3.61067	3.16266	39.54	2.19657	3.3538
39.56	3.64454	2.9579	39.56	2.22974	3.2122
39.58	3.66422	3.05661	39.58	2.18483	3.21946
39.6	3.73216	3.32236	39.6	2.24918	3.15433
39.62	3.65389	2.9589	39.62	2.2238	3.32616
39.64	3.76798	2.88966	39.64	2.30208	3.03146
39.66	3.6944	2.93218	39.66	2.20517	3.17648
39.68	3.59147	3.06971	39.68	2.23353	3.02961
39.7	3.65469	3.33681	39.7	2.11787	3.30623
39.72	3.67825	3.17067	39.72	2.13883	3.34181
39.74	3.57588	3.13307	39.74	2.17779	3.15193
39.76	3.63921	2.99939	39.76	2.13408	3.20243
39.78	3.61126	3.11384	39.78	2.22201	3.01946
39.8	3.68669	2.8333	39.8	2.27301	3.07337
39.82	3.74411	2.86763	39.82	2.20723	3.15789
39.84	3.65657	2.99282	39.84	2.29952	3.30117
39.86	3.49232	3.2093	39.86	2.33842	3.31223
39.88	3.61936	3.27703	39.88	2.24912	2.92614
39.9	3.6287	3.30088	39.9	2.13634	2.88078
39.92	3.64013	3.08227	39.92	2.21727	2.79129
39.94	3.61134	3.09795	39.94	2.20558	2.7885
39.96	3.55016	3.10205	39.96	2.27347	3.08702
39.98	3.61924	3.43218	39.98	2.18195	3.08169
[truncated: 502 more rows]

## Sheet: Codeine
Time (ns)	protein_ARG1	LIG_Codeine	Time (ns)	protein_ARG2	LIG_Codeine
0.02	0.77637	0.551873	0.02	0.840053	0.380388
0.04	0.963284	0.491819	0.04	0.886732	0.367525
0.06	1.08613	0.621876	0.06	0.954102	0.781151
0.08	1.17422	0.688702	0.08	1.11004	0.831107
0.1	1.23883	0.741886	0.1	1.0074	0.797764
0.12	1.07204	0.674572	0.12	1.04209	0.371987
0.14	1.02366	0.749016	0.14	1.11496	0.362743
0.16	1.1085	0.777159	0.16	1.09188	0.614845
0.18	1.04555	0.771283	0.18	1.20148	0.572721
0.2	1.04176	0.588575	0.2	1.08975	0.59972
0.22	1.0949	0.635506	0.22	1.1912	0.580071
0.24	1.08743	0.601035	0.24	1.18379	0.410438
0.26	1.17271	0.418172	0.26	1.0961	0.302
0.28	1.34686	0.52923	0.28	1.21711	0.391245
0.3	1.27965	0.353711	0.3	1.15729	0.261756
0.32	1.39051	0.602397	0.32	1.12962	0.787132
0.34	1.30748	0.673458	0.34	1.21522	0.852891
0.36	1.41431	0.709461	0.36	1.13426	0.821145
0.38	1.3078	0.873573	0.38	1.13787	0.806123
0.4	1.40172	0.683032	0.4	1.19238	0.879694
0.42	1.56229	0.614756	0.42	1.19941	0.826381
0.44	1.49411	0.695629	0.44	1.20938	0.841286
0.46	1.38319	0.422706	0.46	1.23725	0.804193
0.48	1.3796	0.641335	0.48	1.23816	0.830683
0.5	1.62202	0.45624	0.5	1.11708	0.824666
0.52	1.5367	0.715451	0.52	1.14879	0.789875
0.54	1.57295	0.855287	0.54	1.1736	0.724382
0.56	1.49098	0.817692	0.56	1.20733	0.701848
0.58	1.66452	0.975088	0.58	1.07919	0.769273
0.6	1.73733	1.05328	0.6	1.05301	0.82091
0.62	1.6993	1.00548	0.62	1.14186	0.829078
0.64	1.65872	1.13736	0.64	1.17775	0.786189
0.66	1.72711	1.22881	0.66	1.0669	0.785467
0.68	1.76531	1.1422	0.68	1.12014	0.787667
0.7	1.84297	0.887381	0.7	1.11591	0.784604
0.72	1.84536	0.625855	0.72	1.11675	0.797768
0.74	1.86739	0.946424	0.74	1.1759	0.769825
0.76	2.07586	1.02561	0.76	1.24466	0.849127
0.78	2.14522	1.02381	0.78	1.32108	0.765804
0.8	2.24082	1.04362	0.8	1.33829	0.771805
0.82	2.14999	0.75362	0.82	1.25758	0.705456
0.84	2.2838	0.732946	0.84	1.18722	0.377407
0.86	2.22859	0.880364	0.86	1.19156	0.241515
0.88	2.37252	0.720829	0.88	1.16502	0.585984
0.9	2.6134	0.913232	0.9	1.22572	0.516064
0.92	2.31092	1.01445	0.92	1.22012	0.52492
0.94	2.34846	1.00738	0.94	1.19269	0.544076
0.96	2.61518	0.99491	0.96	1.20659	0.357776
0.98	2.59707	1.03649	0.98	1.18859	0.315711
1	2.66283	0.867889	1	1.15879	0.774029
1.02	2.46111	0.878643	1.02	1.23596	0.833009
1.04	2.67609	0.7906	1.04	1.24385	0.334634
1.06	2.86911	0.955853	1.06	1.14676	0.439427
1.08	3.18895	0.743918	1.08	1.23759	0.592757
1.1	3.39643	0.861275	1.1	1.18938	0.639369
1.12	3.38409	0.831621	1.12	1.2744	0.600943
1.14	3.4157	0.883016	1.14	1.20953	0.585556
1.16	3.65163	1.21218	1.16	1.21736	0.688014
1.18	3.33478	0.999967	1.18	1.19023	0.580342
1.2	3.1813	1.1163	1.2	1.16845	0.887281
1.22	2.95785	1.15757	1.22	1.22829	0.855439
1.24	2.92334	1.08	1.24	1.15354	0.808844
1.26	2.95634	1.10676	1.26	1.08775	0.829981
1.28	3.25673	1.0368	1.28	1.13871	0.792653
1.3	3.34545	1.14993	1.3	1.1557	0.778488
1.32	3.32714	1.10436	1.32	1.12067	0.82024
1.34	3.21551	0.921233	1.34	1.1183	0.567389
1.36	3.36708	0.66044	1.36	1.17681	0.560603
1.38	3.38499	0.919989	1.38	1.19203	0.271668
1.4	3.36552	0.738057	1.4	1.24272	0.219671
1.42	3.2542	0.673629	1.42	1.31422	0.551598
1.44	3.25183	0.878371	1.44	1.35012	0.555924
1.46	3.15996	0.663391	1.46	1.29758	0.640031
1.48	3.34536	0.884041	1.48	1.35823	0.791123
1.5	3.24087	0.733735	1.5	1.19538	0.835716
1.52	3.44196	0.890605	1.52	1.31784	0.806122
1.54	3.42677	0.84243	1.54	1.50955	0.775679
1.56	3.35249	0.774409	1.56	1.34022	0.851225
1.58	3.37017	0.875962	1.58	1.29116	0.809944
1.6	3.40004	0.901548	1.6	1.37003	0.827995
1.62	3.47193	0.594497	1.62	1.40257	0.762123
1.64	3.45644	0.919158	1.64	1.42564	0.721442
1.66	3.51477	0.876484	1.66	1.39473	0.748518
1.68	3.12786	0.806713	1.68	1.50011	0.489115
1.7	3.28943	0.678909	1.7	1.56865	0.818146
1.72	3.33028	0.947466	1.72	1.6045	0.830102
1.74	3.39259	1.03326	1.74	1.56208	0.403467
1.76	3.63676	1.18058	1.76	1.47425	0.535754
1.78	3.79576	1.29913	1.78	1.51687	0.254248
1.8	3.68854	1.16039	1.8	1.47724	0.457481
1.82	3.66075	1.17268	1.82	1.54375	0.309917
1.84	3.74324	1.29201	1.84	1.46598	0.534042
1.86	3.62823	1.19958	1.86	1.51364	0.537665
1.88	3.51398	1.06639	1.88	1.47818	0.656692
1.9	3.29607	0.940166	1.9	1.49819	0.581527
1.92	3.32689	1.0876	1.92	1.48907	0.68132
1.94	3.34321	1.27276	1.94	1.4268	0.60056
1.96	3.44359	1.12136	1.96	1.45177	0.394782
1.98	3.53613	1.21175	1.98	1.48178	0.32429
2	3.48316	1.1908	2	1.4675	0.624619
2.02	3.52043	1.13564	2.02	1.4367	0.822726
2.04	3.2915	0.978977	2.04	1.33699	0.733375
2.06	3.36109	1.15067	2.06	1.39845	0.791592
2.08	3.50221	1.01209	2.08	1.40143	0.740135
2.1	3.50462	1.2223	2.1	1.36649	0.549392
2.12	3.54446	0.921636	2.12	1.4017	0.396597
2.14	3.18462	1.08145	2.14	1.3511	0.823387
2.16	3.29887	0.861434	2.16	1.34647	0.671853
2.18	3.58442	0.841646	2.18	1.33638	0.369405
2.2	3.63059	0.999197	2.2	1.50064	0.345571
2.22	3.57148	1.11023	2.22	1.43674	0.592289
2.24	3.63411	1.02856	2.24	1.36169	0.551622
2.26	3.47744	1.1341	2.26	1.39728	0.852298
2.28	3.77106	0.907858	2.28	1.47509	0.555101
2.3	3.58961	0.997312	2.3	1.39037	0.601116
2.32	3.39653	1.02211	2.32	1.49352	0.306313
2.34	3.70102	0.955403	2.34	1.38923	0.414297
2.36	3.46991	0.761076	2.36	1.36394	0.84061
2.38	3.64144	0.894647	2.38	1.44503	0.578826
2.4	3.58634	0.872994	2.4	1.55965	0.442674
2.42	3.37644	0.971065	2.42	1.46482	0.800733
2.44	3.58049	1.2056	2.44	1.37764	0.824257
2.46	3.66871	1.04707	2.46	1.42003	0.838864
2.48	3.73504	1.0498	2.48	1.49183	0.744352
2.5	3.96888	1.03764	2.5	1.61183	0.761841
2.52	3.96689	1.06609	2.52	1.66599	0.482894
2.54	4.0664	1.08658	2.54	1.66644	0.534189
2.56	3.99984	1.04566	2.56	1.49564	0.658314
2.58	4.244	0.998146	2.58	1.55878	0.816911
2.6	4.08437	1.17624	2.6	1.52855	0.766457
2.62	4.0938	1.08372	2.62	1.50519	0.78343
2.64	4.29824	1.05854	2.64	1.48069	0.891842
2.66	4.22335	0.926065	2.66	1.46625	0.774947
2.68	4.27254	0.994432	2.68	1.37193	0.81293
2.7	4.14286	1.12373	2.7	1.51932	0.692785
2.72	4.12053	1.03663	2.72	1.48514	0.556388
2.74	4.19198	1.05005	2.74	1.53638	0.593499
2.76	4.02506	1.08536	2.76	1.55309	0.303449
2.78	4.03616	1.07968	2.78	1.5876	0.492482
2.8	4.08887	1.07632	2.8	1.55891	0.515001
2.82	3.97291	1.15058	2.82	1.54055	0.638527
2.84	4.07138	0.998962	2.84	1.55864	0.788798
2.86	3.99799	1.14459	2.86	1.62857	0.455591
2.88	4.03996	1.1042	2.88	1.6635	0.299962
2.9	4.11592	0.948005	2.9	1.53265	0.534779
2.92	4.09875	0.882638	2.92	1.5536	0.574463
2.94	4.00349	0.905648	2.94	1.64122	0.739548
2.96	3.95814	0.942159	2.96	1.56802	0.266391
2.98	4.01372	1.02912	2.98	1.59503	0.275845
3	3.93529	0.829078	3	1.64286	0.312614
3.02	3.86072	0.775103	3.02	1.70188	0.285908
3.04	3.99243	0.843648	3.04	1.60776	0.607127
3.06	3.94319	0.991594	3.06	1.66824	0.596323
3.08	3.94818	0.862709	3.08	1.59174	0.594517
3.1	3.92131	0.925491	3.1	1.69061	0.531685
3.12	4.04943	0.795442	3.12	1.5288	0.571267
3.14	3.87754	1.0188	3.14	1.72509	0.576509
3.16	3.89028	0.834846	3.16	1.63157	0.65146
3.18	3.91989	0.934697	3.18	1.59999	0.584472
3.2	4.01478	1.04991	3.2	1.59781	0.304303
3.22	3.9651	1.06552	3.22	1.65483	0.592056
3.24	3.91346	0.961013	3.24	1.51654	0.473253
3.26	3.83624	1.00418	3.26	1.63106	0.381456
3.28	3.99216	1.02406	3.28	1.50618	0.307032
3.3	3.88569	1.06296	3.3	1.64235	0.299588
3.32	3.70311	0.854379	3.32	1.59544	0.671827
3.34	3.74849	1.04019	3.34	1.51409	0.578613
3.36	3.7802	0.942349	3.36	1.41829	0.513136
3.38	3.66913	0.974135	3.38	1.48302	0.642851
3.4	3.67741	1.01492	3.4	1.53389	0.700846
3.42	3.49357	1.1076	3.42	1.58128	0.566572
3.44	3.60468	1.03837	3.44	1.53435	0.781949
3.46	3.80201	0.987938	3.46	1.5867	0.514238
3.48	3.76816	0.834215	3.48	1.5406	0.316109
3.5	3.92717	0.975524	3.5	1.61789	0.665565
3.52	4.02691	1.09592	3.52	1.57961	0.572381
3.54	3.8815	0.966733	3.54	1.41244	0.286293
3.56	3.61315	0.978841	3.56	1.55942	0.299409
3.58	3.54865	1.04397	3.58	1.50521	0.570572
3.6	3.57142	1.11256	3.6	1.58721	0.572436
3.62	3.58889	0.916122	3.62	1.48454	0.592001
3.64	3.53471	0.930189	3.64	1.6477	0.425343
3.66	3.49381	1.0404	3.66	1.65784	0.57205
3.68	3.50994	0.9994	3.68	1.63803	0.566015
3.7	3.54934	0.933472	3.7	1.61981	0.624813
3.72	3.68952	0.874527	3.72	1.64761	0.59071
3.74	3.79711	1.01657	3.74	1.76157	0.520939
3.76	3.93654	1.10267	3.76	1.56459	0.543637
3.78	3.78173	1.03666	3.78	1.64452	0.580267
3.8	3.79488	1.14284	3.8	1.70141	0.59571
3.82	3.8615	0.995701	3.82	1.70802	0.529948
3.84	3.78367	1.05238	3.84	1.61107	0.579029
3.86	3.82763	1.11865	3.86	1.64421	0.478892
3.88	3.8341	0.913207	3.88	1.56947	0.526252
3.9	3.85728	0.888994	3.9	1.57062	0.608217
3.92	3.81589	0.807773	3.92	1.58972	0.584258
3.94	3.84614	0.722908	3.94	1.75723	0.56859
3.96	3.89962	1.37748	3.96	1.67829	0.598543
3.98	3.68804	1.25773	3.98	1.53205	0.590457
4	3.54119	1.32072	4	1.66329	0.646123
4.02	3.57304	0.98401	4.02	1.67836	0.579053
4.04	3.65616	1.01015	4.04	1.63158	0.562591
4.06	3.74113	0.922427	4.06	1.61389	0.306095
4.08	3.6155	1.00844	4.08	1.5185	0.611022
4.1	3.53582	0.666795	4.1	1.55531	0.657378
4.12	3.65774	0.984646	4.12	1.56408	0.523806
4.14	3.77363	0.800734	4.14	1.56592	0.635082
4.16	3.75543	0.861238	4.16	1.60656	0.537176
4.18	3.80008	0.910749	4.18	1.57595	0.375152
4.2	3.74282	0.915322	4.2	1.55647	0.37861
4.22	3.68176	1.02371	4.22	1.52912	0.637121
4.24	3.60689	0.967148	4.24	1.51927	0.577364
4.26	3.4869	0.901857	4.26	1.46184	0.711063
4.28	3.48302	1.08205	4.28	1.52952	0.327735
4.3	3.37644	1.02334	4.3	1.53801	0.442465
4.32	3.29512	0.915247	4.32	1.52522	0.341771
4.34	3.43283	0.882346	4.34	1.62696	0.337072
4.36	3.34189	0.805173	4.36	1.44836	0.308731
4.38	3.41004	0.930917	4.38	1.54288	0.566984
4.4	3.68675	1.02966	4.4	1.38842	0.251658
4.42	3.65362	1.19665	4.42	1.42709	0.286092
4.44	3.68613	1.32349	4.44	1.46106	0.372578
4.46	3.88056	1.05137	4.46	1.52754	0.598603
4.48	3.75318	1.10653	4.48	1.4566	0.692908
4.5	3.61918	1.00726	4.5	1.48191	0.429033
4.52	3.59987	1.15002	4.52	1.42762	0.636831
4.54	3.69157	0.918921	4.54	1.48058	0.513062
4.56	3.68934	1.05609	4.56	1.47457	0.560854
4.58	3.54405	0.945874	4.58	1.56187	0.532701
4.6	3.49704	0.920482	4.6	1.62758	0.611914
4.62	3.49444	1.01337	4.62	1.62193	0.684286
4.64	3.64754	0.865789	4.64	1.53334	0.642666
4.66	3.69504	0.787362	4.66	1.56196	0.582311
4.68	3.78746	0.864233	4.68	1.55272	0.819823
4.7	3.83679	0.878086	4.7	1.53165	0.626145
4.72	3.64351	1.00824	4.72	1.55724	0.522015
4.74	3.54404	1.03218	4.74	1.50981	0.551344
4.76	3.33476	1.09744	4.76	1.55067	0.382506
4.78	3.45561	1.28526	4.78	1.54952	0.388343
4.8	3.46161	1.0967	4.8	1.54257	0.453254
4.82	3.44834	1.13766	4.82	1.71653	0.289705
4.84	3.63838	0.865765	4.84	1.68173	0.307797
4.86	3.48097	1.04318	4.86	1.78174	0.611573
4.88	3.40475	0.853459	4.88	1.66656	0.648125
4.9	3.4068	0.803388	4.9	1.70154	0.376271
4.92	3.33252	0.907033	4.92	1.65433	0.597571
4.94	3.3192	1.10601	4.94	1.73382	0.644509
4.96	3.47321	1.20419	4.96	1.66447	0.595042
4.98	3.48547	0.979761	4.98	1.64795	0.598239
5	3.45426	0.820291	5	1.73206	0.62922
5.02	3.59825	0.878563	5.02	1.81769	0.601677
5.04	3.46314	1.00335	5.04	1.81078	0.621203
5.06	3.5641	0.922717	5.06	1.76868	0.319797
5.08	3.49943	1.08639	5.08	1.81406	0.592687
5.1	3.33302	1.17673	5.1	1.71303	0.307142
5.12	3.52983	1.2743	5.12	1.60276	0.317805
5.14	3.521	1.29359	5.14	1.70192	0.382441
5.16	3.44968	1.01759	5.16	1.70574	0.59471
5.18	3.33852	1.16216	5.18	1.72982	0.564307
5.2	3.18204	1.24165	5.2	1.71373	0.289444
5.22	3.15345	0.913447	5.22	1.63136	0.575705
5.24	2.95319	1.11514	5.24	1.67493	0.62631
5.26	2.84837	1.04617	5.26	1.67764	0.618655
5.28	2.69511	1.13698	5.28	1.66236	0.578785
5.3	2.73431	1.10048	5.3	1.71328	0.572453
5.32	2.79707	1.34093	5.32	1.62728	0.518552
5.34	2.71969	1.10952	5.34	1.62877	0.313832
5.36	2.6548	1.24447	5.36	1.69768	0.262137
5.38	2.59855	1.23728	5.38	1.60597	0.416578
5.4	2.57269	1.1638	5.4	1.6494	0.413645
5.42	2.55918	1.17047	5.42	1.5988	0.594214
5.44	2.55988	1.15105	5.44	1.7432	0.511104
5.46	2.61941	1.131	5.46	1.78238	0.663448
5.48	2.54388	0.931448	5.48	1.69163	0.584606
5.5	2.49688	1.02999	5.5	1.72752	0.650989
5.52	2.41556	1.0758	5.52	1.76675	0.517655
5.54	2.39287	0.952517	5.54	1.8012	0.58322
5.56	2.36556	1.31293	5.56	1.70962	0.752308
5.58	2.63784	1.03231	5.58	1.75501	0.338806
5.6	2.48478	1.14875	5.6	1.78786	0.353919
5.62	2.64697	0.941059	5.62	1.77028	0.573553
5.64	2.6455	1.20054	5.64	1.80848	0.353389
5.66	2.46182	0.972499	5.66	1.82254	0.359522
5.68	2.48569	1.00899	5.68	1.6993	0.287376
5.7	2.7811	1.2354	5.7	1.70061	0.372458
5.72	2.92366	0.865075	5.72	1.61626	0.326402
5.74	3.12357	0.88495	5.74	1.73793	0.621174
5.76	3.08407	1.12257	5.76	1.6228	0.577933
5.78	2.7211	1.20527	5.78	1.68949	0.557102
5.8	2.76318	1.05261	5.8	1.7426	0.630345
5.82	2.71496	0.951227	5.82	1.67526	0.598227
5.84	2.81804	0.916554	5.84	1.64078	0.454134
5.86	2.80787	1.18378	5.86	1.69	0.299117
5.88	2.79384	0.814545	5.88	1.63367	0.376254
5.9	2.85964	0.893776	5.9	1.64716	0.355999
5.92	3.06135	1.12892	5.92	1.71724	0.338767
5.94	3.00876	1.27685	5.94	1.68366	0.327399
5.96	2.8471	0.961374	5.96	1.64904	0.519459
5.98	2.8486	1.01604	5.98	1.69535	0.687354
6	3.04848	0.864544	6	1.68413	0.725768
6.02	3.06186	1.13823	6.02	1.69008	0.749212
6.04	3.02779	1.102	6.04	1.62509	0.377599
6.06	3.10455	1.11847	6.06	1.6475	0.361346
6.08	2.96421	1.10448	6.08	1.75593	0.864268
6.1	3.00275	1.08197	6.1	1.71821	0.561156
6.12	3.22479	1.20903	6.12	1.83638	0.785526
6.14	3.07487	1.16128	6.14	1.70318	0.775115
6.16	2.92848	1.13451	6.16	1.71689	0.775253
6.18	3.18547	1.29659	6.18	1.70279	0.791807
6.2	3.29767	1.41664	6.2	1.71597	0.692806
6.22	3.38725	1.15708	6.22	1.81212	0.954615
6.24	3.26384	1.14794	6.24	1.67555	0.721278
6.26	3.24988	1.17017	6.26	1.7898	0.741372
6.28	3.21357	0.757221	6.28	1.72816	0.754651
6.3	3.30318	1.34663	6.3	1.73101	0.995028
6.32	3.49065	1.18168	6.32	1.73713	0.784946
6.34	3.64847	1.17211	6.34	1.61828	0.878013
6.36	3.47468	1.14701	6.36	1.62227	0.648298
6.38	3.42005	1.1289	6.38	1.60251	0.594801
6.4	3.26597	0.890322	6.4	1.55536	0.856576
6.42	3.31412	1.01463	6.42	1.62606	0.976175
6.44	3.30817	0.987065	6.44	1.66579	0.796924
6.46	3.06188	1.02596	6.46	1.56567	0.846873
6.48	3.25502	1.1105	6.48	1.64879	0.964716
6.5	3.19569	1.1253	6.5	1.63785	0.979179
6.52	3.27307	1.19537	6.52	1.60278	0.836046
6.54	3.07032	0.875992	6.54	1.5778	0.761176
6.56	3.1791	0.881374	6.56	1.62735	0.662964
6.58	3.25325	1.08903	6.58	1.703	0.751975
6.6	3.31124	1.09356	6.6	1.65414	0.746102
6.62	3.1848	1.04914	6.62	1.58967	0.752964
6.64	3.28951	0.836846	6.64	1.68097	0.785226
6.66	3.3412	0.720173	6.66	1.65712	0.714532
6.68	3.44421	0.903957	6.68	1.61713	0.747651
6.7	3.3366	0.978248	6.7	1.61159	0.829219
6.72	2.83301	0.8933	6.72	1.5848	0.804309
6.74	3.12848	1.11896	6.74	1.55505	0.736955
6.76	2.81265	1.06817	6.76	1.64327	0.760887
6.78	2.95648	1.19273	6.78	1.63609	0.928336
6.8	2.69913	1.25513	6.8	1.67381	0.955894
6.82	2.82656	1.17648	6.82	1.74875	1.01364
6.84	2.85296	0.895253	6.84	1.78157	0.810413
6.86	2.92377	0.852704	6.86	1.74854	0.913002
6.88	3.04083	0.764852	6.88	1.74359	0.980831
6.9	2.95334	0.870254	6.9	1.69678	1.02905
6.92	2.91184	1.12776	6.92	1.75571	0.874525
6.94	2.78192	1.15719	6.94	1.69319	0.749227
6.96	2.75858	1.41045	6.96	1.74678	0.753983
6.98	2.56588	0.942892	6.98	1.76707	0.800057
7	2.58639	0.905926	7	1.67664	0.73369
7.02	2.59224	0.849075	7.02	1.74635	0.895669
7.04	2.47435	1.15411	7.04	1.76625	0.79505
7.06	2.65191	1.0611	7.06	1.68446	0.579124
7.08	2.62109	1.18143	7.08	1.62122	0.562694
7.1	2.64606	1.25958	7.1	1.68099	0.786844
7.12	2.54877	1.13779	7.12	1.65789	0.748229
7.14	2.33952	0.708069	7.14	1.7478	0.623608
7.16	2.41984	0.885113	7.16	1.60029	0.622483
7.18	2.4156	0.895885	7.18	1.68726	0.778331
7.2	2.49455	0.914324	7.2	1.72349	0.756183
7.22	2.485	0.946572	7.22	1.72568	0.750087
7.24	2.53628	0.910739	7.24	1.69581	0.747605
7.26	2.37102	1.1642	7.26	1.76575	0.533376
7.28	2.38598	1.13858	7.28	1.82002	0.624949
7.3	2.41733	1.20678	7.3	1.78147	0.652658
7.32	2.43331	1.04345	7.32	1.84475	0.65447
7.34	2.39355	1.12494	7.34	1.83942	0.586855
7.36	2.40679	1.19674	7.36	1.67818	0.589945
7.38	2.37627	1.02644	7.38	1.74461	0.556781
7.4	2.74552	0.957709	7.4	1.77283	0.583571
7.42	2.83358	1.05777	7.42	1.78302	0.608531
7.44	2.64236	1.0306	7.44	1.82846	1.05878
7.46	2.50367	1.04437	7.46	1.65111	0.922438
7.48	2.58885	1.10013	7.48	1.67417	1.00737
7.5	2.67254	0.85696	7.5	1.66412	0.982765
7.52	2.73428	1.03535	7.52	1.70721	0.932384
7.54	2.69376	1.15446	7.54	1.66796	0.799829
7.56	2.72341	1.31547	7.56	1.63385	0.804601
7.58	2.92818	1.03126	7.58	1.72114	0.778882
7.6	2.99029	1.13954	7.6	1.67975	0.605321
7.62	2.95882	1.13127	7.62	1.66647	0.563497
7.64	2.77682	0.768227	7.64	1.71746	0.596785
7.66	2.7573	1.02707	7.66	1.63012	0.54933
7.68	2.91973	0.95768	7.68	1.74198	0.570495
7.7	2.80287	0.885731	7.7	1.5974	0.746464
7.72	2.83637	1.25829	7.72	1.5734	0.754128
7.74	3.07409	0.749487	7.74	1.62457	0.583299
7.76	3.06405	0.945707	7.76	1.64823	0.658462
7.78	3.06455	1.22536	7.78	1.59939	0.606832
7.8	3.00409	1.17174	7.8	1.58344	1.01242
7.82	3.05567	1.06929	7.82	1.5747	0.950406
7.84	3.08298	1.00497	7.84	1.67088	0.580585
7.86	3.25323	1.1175	7.86	1.57478	0.630104
7.88	3.16295	0.920548	7.88	1.55617	0.850272
7.9	3.06048	1.27516	7.9	1.56072	0.798686
7.92	2.88941	1.12455	7.92	1.57584	0.793794
7.94	2.77084	1.13871	7.94	1.55258	0.744825
7.96	2.8305	1.15137	7.96	1.70851	0.821499
7.98	2.93987	1.06335	7.98	1.7298	0.681472
8	3.21185	0.871446	8	1.67145	0.616961
8.02	3.3212	1.07195	8.02	1.54315	0.760097
8.04	3.17641	0.943824	8.04	1.55695	0.824131
8.06	3.35277	0.847991	8.06	1.59759	0.745041
8.08	3.22336	0.692157	8.08	1.56465	0.733687
8.1	3.40219	1.13162	8.1	1.54377	0.768467
8.12	3.32826	0.945851	8.12	1.58662	0.734598
8.14	3.34677	0.887676	8.14	1.6017	0.740851
8.16	3.50863	0.937062	8.16	1.58469	0.77405
8.18	3.36271	1.12595	8.18	1.59195	0.711753
8.2	3.2959	1.36999	8.2	1.61753	0.792911
8.22	3.34256	1.12051	8.22	1.5593	0.783677
8.24	3.29006	0.932183	8.24	1.62404	0.756602
8.26	3.57436	0.891428	8.26	1.71183	0.767175
8.28	3.36919	0.852134	8.28	1.60548	0.725897
8.3	3.40599	0.990643	8.3	1.57799	0.666277
8.32	3.34876	0.794968	8.32	1.62358	0.604352
8.34	3.13839	1.26719	8.34	1.61273	0.772761
8.36	3.30726	0.84036	8.36	1.57173	0.819248
8.38	3.15923	1.02631	8.38	1.57245	0.82261
8.4	3.19351	0.876924	8.4	1.64402	0.800496
8.42	3.37952	1.09237	8.42	1.63028	0.616964
8.44	3.3247	1.05265	8.44	1.5808	0.607461
8.46	3.37913	1.15074	8.46	1.64701	0.786268
8.48	3.24862	0.93966	8.48	1.6563	0.787464
8.5	3.09457	1.18354	8.5	1.69433	0.77427
8.52	3.03974	1.24279	8.52	1.70343	0.737777
8.54	3.08419	1.26964	8.54	1.78671	0.742686
8.56	3.2012	1.25724	8.56	1.83397	0.724776
8.58	2.93614	1.25318	8.58	1.65886	0.764125
8.6	3.15478	0.834524	8.6	1.68317	0.714676
8.62	3.07049	1.0237	8.62	1.76479	0.782181
8.64	2.99588	1.25096	8.64	1.74189	0.680988
8.66	2.58008	1.13026	8.66	1.75117	0.750648
8.68	2.80706	1.13481	8.68	1.82513	0.734228
8.7	2.63277	1.11829	8.7	1.82386	0.771596
8.72	2.88208	1.20855	8.72	1.76438	0.744355
8.74	2.79764	1.27354	8.74	1.84864	0.729604
8.76	2.68092	0.915642	8.76	1.80657	0.795151
8.78	2.57111	0.981708	8.78	1.85197	0.830169
8.8	2.45507	1.28641	8.8	1.89733	0.997627
8.82	2.348	1.06214	8.82	1.91991	0.614971
8.84	2.36201	1.06763	8.84	1.85287	0.593921
8.86	2.31946	1.0929	8.86	1.75618	0.795103
8.88	2.30236	1.11151	8.88	1.75647	0.720026
8.9	2.33432	0.867461	8.9	1.6567	0.697122
8.92	2.17915	1.05545	8.92	1.60477	0.835155
8.94	2.44853	1.0998	8.94	1.74345	0.789856
8.96	2.5687	1.27505	8.96	1.78165	0.621014
8.98	2.42661	0.896959	8.98	1.88841	0.774449
9	2.34552	0.817936	9	1.78943	0.652612
9.02	2.38002	1.1303	9.02	1.65303	0.655299
9.04	2.43056	0.971193	9.04	1.84349	0.578873
9.06	2.5027	0.956483	9.06	1.63208	0.71094
9.08	2.41675	1.12832	9.08	1.76835	0.592555
9.1	2.5117	1.04267	9.1	1.79779	0.727617
9.12	2.47141	0.98788	9.12	1.7695	0.72959
9.14	2.24169	0.758622	9.14	1.64988	0.7231
9.16	2.1857	0.818163	9.16	1.61713	0.767192
9.18	2.28417	0.718632	9.18	1.62027	0.818636
9.2	2.35589	1.24615	9.2	1.62263	0.797641
9.22	2.13396	1.21639	9.22	1.61679	0.798793
9.24	2.27574	1.15895	9.24	1.72323	0.737756
9.26	2.29809	1.27098	9.26	1.6294	0.751508
9.28	2.11281	1.11501	9.28	1.65983	0.795011
9.3	2.01099	1.20023	9.3	1.63501	0.807553
9.32	1.99089	1.25553	9.32	1.70212	0.796521
9.34	2.11761	0.889826	9.34	1.59249	0.605138
9.36	2.01973	0.922553	9.36	1.67069	0.660145
9.38	2.09455	0.971397	9.38	1.55328	0.608908
9.4	2.14404	1.16062	9.4	1.52737	0.605219
9.42	2.33286	1.16562	9.42	1.58891	0.731177
9.44	2.21216	1.05447	9.44	1.48483	0.831538
9.46	2.27872	1.01589	9.46	1.48878	0.745288
9.48	2.24481	1.17443	9.48	1.52739	0.827619
9.5	2.07463	1.09419	9.5	1.52241	0.825315
9.52	1.94516	1.28684	9.52	1.61439	0.7972
9.54	2.05585	0.887125	9.54	1.569	0.770277
9.56	2.03752	1.11079	9.56	1.54138	0.815145
9.58	2.03982	1.14286	9.58	1.53738	0.821048
9.6	2.12902	1.23782	9.6	1.6145	0.78735
9.62	2.06778	0.860461	9.62	1.65818	0.772662
9.64	2.18105	0.974692	9.64	1.71557	0.791183
9.66	2.20958	0.985761	9.66	1.68422	0.754863
9.68	2.1522	0.983788	9.68	1.69741	0.788854
9.7	2.15871	0.797956	9.7	1.78012	0.772802
9.72	2.34719	0.974892	9.72	1.80316	0.585832
9.74	2.47398	1.13179	9.74	1.82787	0.607891
9.76	2.51054	1.14253	9.76	1.75484	0.86602
9.78	2.40027	1.08948	9.78	1.74849	0.842778
9.8	2.38831	1.21438	9.8	1.74925	0.927565
9.82	2.39291	0.768258	9.82	1.74918	0.828833
9.84	2.34386	0.915201	9.84	1.66283	0.683717
9.86	2.45852	0.787325	9.86	1.66449	0.759395
9.88	2.42238	0.954398	9.88	1.6713	1.02497
9.9	2.18054	1.04746	9.9	1.61992	0.990657
9.92	2.3028	1.12246	9.92	1.72288	0.958133
9.94	2.13633	0.995382	9.94	1.65694	0.949958
9.96	2.18061	1.18971	9.96	1.5677	0.964498
9.98	2.13326	1.13649	9.98	1.59371	0.934073
10	2.29105	1.3354	10	1.68215	0.924928
10.02	2.39511	1.24091	10.02	1.60111	0.93437
10.04	2.28703	1.07669	10.04	1.77284	1.01847
10.06	2.35647	1.0552	10.06	1.83169	0.935922
10.08	2.2211	1.3453	10.08	1.67089	0.953814
10.1	2.32185	1.19618	10.1	1.68255	0.966884
10.12	2.42253	0.687137	10.12	1.71659	0.97502
10.14	2.2889	1.05785	10.14	1.71348	0.581771
10.16	2.53021	1.01591	10.16	1.71251	0.604344
10.18	2.51606	1.16266	10.18	1.69764	0.606731
10.2	2.57034	1.01466	10.2	1.63469	0.988129
10.22	2.4851	0.898527	10.22	1.69853	0.966886
10.24	2.47733	0.999074	10.24	1.73451	0.974157
10.26	2.44753	0.893595	10.26	1.75714	0.962263
10.28	2.65183	1.0679	10.28	1.7624	0.962271
10.3	2.57492	0.88104	10.3	1.80395	0.97311
10.32	2.3484	0.817546	10.32	1.83293	1.01444
10.34	2.2111	0.806305	10.34	1.70147	0.98043
10.36	2.29417	1.06236	10.36	1.68233	1.00802
10.38	2.40226	0.948619	10.38	1.6669	0.761071
10.4	2.35897	1.0578	10.4	1.74081	0.821861
10.42	2.49245	1.10874	10.42	1.72051	0.715548
10.44	2.47305	0.891421	10.44	1.69987	0.776021
10.46	2.3192	1.11238	10.46	1.8015	0.753337
10.48	2.35337	1.25899	10.48	1.76554	0.765548
10.5	2.41895	1.29559	10.5	1.70483	0.835448
10.52	2.49475	0.84364	10.52	1.83153	0.861105
10.54	2.5738	0.810789	10.54	1.75843	0.740413
10.56	2.62233	0.939316	10.56	1.82423	0.573684
10.58	2.56568	0.884286	10.58	1.78904	0.627392
10.6	2.53908	0.930263	10.6	1.62222	0.96751
10.62	2.50626	0.918194	10.62	1.63269	0.831853
10.64	2.33891	0.964996	10.64	1.67957	1.00874
10.66	2.3988	0.931485	10.66	1.60155	0.976814
10.68	2.38235	0.916766	10.68	1.54469	1.02593
10.7	2.39279	1.09365	10.7	1.60464	0.970494
10.72	2.43189	1.14585	10.72	1.61995	0.620397
10.74	2.47125	0.97719	10.74	1.6809	0.833488
10.76	2.31958	1.11935	10.76	1.57145	0.934072
10.78	2.29543	1.10943	10.78	1.72846	0.926577
10.8	2.26334	0.899945	10.8	1.7125	0.96333
10.82	2.267	1.00607	10.82	1.57112	0.838705
10.84	2.20512	1.02228	10.84	1.72227	0.583667
10.86	2.31317	0.883279	10.86	1.63109	0.78951
10.88	2.52435	1.19398	10.88	1.57605	0.85569
10.9	2.49965	1.07328	10.9	1.69206	0.769344
10.92	2.44997	0.850349	10.92	1.62432	0.748908
10.94	2.2785	1.19514	10.94	1.63806	0.597143
10.96	2.19751	1.02732	10.96	1.63906	0.963887
10.98	2.37342	1.33075	10.98	1.71682	1.01291
11	2.32542	1.09113	11	1.7604	0.928355
11.02	2.42229	0.764042	11.02	1.7729	0.973741
11.04	2.45563	1.10791	11.04	1.87227	0.925522
11.06	2.18034	0.905299	11.06	1.89267	0.910145
11.08	2.24427	1.02611	11.08	1.78074	0.753523
11.1	2.24583	0.966672	11.1	1.77194	0.916062
11.12	2.28548	1.32884	11.12	1.67905	0.880988
11.14	2.50601	1.10414	11.14	1.85695	0.983628
11.16	2.50152	1.19853	11.16	1.9027	0.997168
11.18	2.47343	1.00354	11.18	1.67873	0.966481
11.2	2.43959	0.84321	11.2	1.75214	0.950339
11.22	2.46828	1.05061	11.22	1.54269	0.965993
11.24	2.37547	0.937737	11.24	1.52283	0.936139
11.26	2.65298	1.02269	11.26	1.56357	0.941927
11.28	2.57547	1.02362	11.28	1.5624	0.98946
11.3	2.51135	1.17007	11.3	1.61341	0.975971
11.32	2.55655	1.1266	11.32	1.73516	0.753497
11.34	2.52935	1.17077	11.34	1.76536	0.958482
11.36	2.4307	1.23092	11.36	1.70484	1.02833
11.38	2.50485	1.12223	11.38	1.74643	0.958127
11.4	2.48794	1.12902	11.4	1.76258	0.926989
11.42	2.61098	0.960733	11.42	1.67391	0.596082
11.44	2.53137	0.753542	11.44	1.74996	0.942454
11.46	2.48156	1.21892	11.46	1.55598	0.993458
11.48	2.66131	1.38419	11.48	1.59999	0.770284
11.5	2.74794	1.07349	11.5	1.61181	0.749432
11.52	2.56514	1.12567	11.52	1.61427	0.741338
11.54	2.74867	1.01528	11.54	1.71593	0.7562
11.56	2.82166	1.03604	11.56	1.66161	0.933228
11.58	2.79608	0.735324	11.58	1.62654	0.876574
11.6	2.85229	0.921243	11.6	1.52412	0.763734
11.62	2.70812	1.23105	11.62	1.65234	0.793216
11.64	2.67477	1.03856	11.64	1.66301	0.61985
11.66	2.62357	0.779362	11.66	1.57221	0.697816
11.68	2.77785	0.925502	11.68	1.55221	0.707336
11.7	2.48008	1.0539	11.7	1.48281	0.710928
11.72	2.20022	1.09148	11.72	1.63176	0.74598
11.74	2.16022	1.04767	11.74	1.69575	0.819674
11.76	2.09876	0.91199	11.76	1.66458	0.992664
11.78	2.1362	1.13841	11.78	1.75825	0.973229
11.8	2.22029	1.2278	11.8	1.694	1.00351
11.82	2.42707	1.03279	11.82	1.72856	0.942419
11.84	2.34758	0.807197	11.84	1.57134	0.987074
11.86	2.24573	0.682116	11.86	1.54661	0.947937
11.88	2.28954	1.04258	11.88	1.72341	0.737739
11.9	2.3108	1.03634	11.9	1.65811	0.844263
11.92	2.18957	1.03154	11.92	1.67098	0.615052
11.94	2.16066	1.31272	11.94	1.52496	0.928809
11.96	2.2129	1.16719	11.96	1.49364	0.771146
11.98	2.41747	1.22573	11.98	1.49563	0.97629
12	2.4666	0.895541	12	1.63071	0.949756
12.02	2.5147	0.973272	12.02	1.67842	0.998442
12.04	2.59048	1.0157	12.04	1.61013	0.836159
12.06	2.55588	1.0092	12.06	1.7342	1.02659
12.08	2.21759	0.767576	12.08	1.66785	1.04825
12.1	2.17727	0.843014	12.1	1.74729	0.880941
12.12	2.26039	1.01572	12.12	1.66351	0.94711
12.14	2.32027	1.022	12.14	1.65083	0.738601
12.16	2.24093	1.0478	12.16	1.64972	0.485393
12.18	2.2489	0.676996	12.18	1.6012	0.570448
12.2	2.35073	1.04788	12.2	1.61196	0.743893
12.22	2.32609	0.741753	12.22	1.56542	0.776599
12.24	2.42339	0.968634	12.24	1.60746	0.792755
12.26	2.20146	1.12619	12.26	1.55122	0.881085
12.28	2.25841	1.04282	12.28	1.61807	0.762758
12.3	2.02795	0.914159	12.3	1.63177	0.826725
12.32	2.15613	1.07767	12.32	1.70304	0.885597
12.34	2.26728	0.97842	12.34	1.64003	0.592503
12.36	2.30881	0.753635	12.36	1.6733	0.314443
12.38	2.17598	1.16474	12.38	1.62714	0.519402
12.4	2.11983	1.32063	12.4	1.66557	0.585987
12.42	2.12749	1.12366	12.42	1.67293	0.807563
12.44	2.19702	1.00029	12.44	1.63574	0.558973
12.46	2.22093	0.814478	12.46	1.66116	0.427406
12.48	2.26749	1.03846	12.48	1.61837	0.32945
12.5	2.38389	1.07004	12.5	1.60267	0.552675
12.52	2.56915	1.11312	12.52	1.63857	0.61647
12.54	2.56808	1.06709	12.54	1.5936	0.563404
12.56	2.56044	1.10169	12.56	1.66578	0.659447
12.58	2.56958	0.693507	12.58	1.68389	0.521884
12.6	2.48459	0.930279	12.6	1.65648	0.59559
12.62	2.41553	1.18245	12.62	1.68141	0.7867
12.64	2.36761	0.895063	12.64	1.65292	0.880185
12.66	2.62848	0.974083	12.66	1.54822	0.375951
12.68	2.59244	0.777771	12.68	1.60537	0.408082
12.7	2.62233	0.833856	12.7	1.59262	0.535226
12.72	2.74403	0.751983	12.72	1.6429	0.761898
12.74	2.75518	0.847362	12.74	1.50244	0.771902
12.76	2.59846	1.02495	12.76	1.64891	0.883288
12.78	2.71545	1.04931	12.78	1.60184	0.828946
12.8	2.77256	1.05167	12.8	1.646	0.811159
12.82	2.66986	0.783351	12.82	1.59269	0.820837
12.84	2.63654	1.02067	12.84	1.60926	0.70661
12.86	2.7583	1.15082	12.86	1.48243	0.433124
12.88	2.56489	1.10789	12.88	1.51684	0.355232
12.9	2.76871	1.02397	12.9	1.53181	0.673441
12.92	2.6668	0.818401	12.92	1.58962	0.868382
12.94	2.54975	0.90405	12.94	1.66749	0.402999
12.96	2.47439	0.957918	12.96	1.62952	0.44328
12.98	2.38645	1.27323	12.98	1.61829	0.780449
13	2.41115	1.07474	13	1.62669	0.841018
13.02	2.42206	1.08621	13.02	1.72733	0.829462
13.04	2.54639	1.02539	13.04	1.55478	0.746123
13.06	2.65493	0.899504	13.06	1.69151	0.526134
13.08	2.57032	1.06001	13.08	1.7005	0.822489
13.1	2.546	1.12524	13.1	1.61588	0.841397
13.12	2.62864	1.08614	13.12	1.59341	0.777323
13.14	2.7721	1.16693	13.14	1.56371	0.761118
13.16	2.54389	1.24478	13.16	1.62211	0.814718
13.18	2.54425	0.734935	13.18	1.66778	0.729578
13.2	2.6474	0.937084	13.2	1.82627	0.600576
13.22	2.58818	1.29127	13.22	1.77554	0.834336
13.24	2.67093	0.746817	13.24	1.74618	0.867561
13.26	2.63539	0.848185	13.26	1.62912	0.752788
13.28	2.76492	1.27513	13.28	1.6514	0.840652
13.3	2.79267	1.16716	13.3	1.66741	0.691284
13.32	2.86812	1.22324	13.32	1.74648	0.776604
13.34	2.93575	1.23447	13.34	1.74287	0.619888
13.36	2.97291	1.2282	13.36	1.6509	0.641212
13.38	2.97548	1.21842	13.38	1.81953	0.801165
13.4	2.82223	1.07021	13.4	1.896	0.886481
13.42	2.87575	1.34604	13.42	1.79807	0.804622
13.44	2.86131	0.962316	13.44	1.85446	0.767879
13.46	2.8749	0.766056	13.46	1.86104	0.819708
13.48	2.90441	0.973855	13.48	1.72523	0.597248
13.5	2.85575	1.01184	13.5	1.70707	0.81094
13.52	2.56099	0.789559	13.52	1.81161	0.596477
13.54	2.54559	0.785796	13.54	1.76127	0.811442
13.56	2.70442	0.953434	13.56	1.78676	0.837781
13.58	2.71578	0.941937	13.58	1.8262	0.809013
13.6	2.5936	0.937542	13.6	1.76326	0.880051
13.62	2.52643	1.22836	13.62	1.85892	0.839805
13.64	2.45624	0.757856	13.64	1.80842	0.79242
13.66	2.37471	1.02631	13.66	1.84488	0.903863
13.68	2.47146	1.01311	13.68	1.78557	0.362282
13.7	2.57372	1.05326	13.7	1.71848	0.592994
13.72	2.44226	1.16605	13.72	1.80427	0.481256
13.74	2.68447	1.15759	13.74	1.73558	0.543554
13.76	2.66516	1.19704	13.76	1.73018	0.820308
13.78	2.40195	0.806861	13.78	1.79669	0.763671
13.8	2.40584	0.870244	13.8	1.62235	0.784246
13.82	2.57218	0.884439	13.82	1.64228	0.753025
13.84	2.60179	1.17109	13.84	1.61411	0.817785
13.86	2.59686	1.20279	13.86	1.63679	0.891237
13.88	2.43563	0.878015	13.88	1.70387	0.591581
13.9	2.50749	0.840106	13.9	1.67759	0.34236
13.92	2.58544	0.737202	13.92	1.72709	0.775149
13.94	2.46204	0.908197	13.94	1.62004	0.832799
13.96	2.54375	1.28942	13.96	1.72592	0.806768
13.98	2.5733	1.04421	13.98	1.70395	0.337179
14	2.566	1.23536	14	1.70691	0.422017
14.02	2.53872	1.2615	14.02	1.82707	0.383675
14.04	2.53826	0.947925	14.04	1.72584	0.817843
14.06	2.54339	0.853789	14.06	1.80084	0.771965
14.08	2.61925	0.850616	14.08	1.70239	0.861991
14.1	2.56924	0.934626	14.1	1.70382	0.836825
14.12	2.66496	1.0815	14.12	1.64053	0.774797
14.14	2.73491	0.841802	14.14	1.6303	0.65493
14.16	2.61369	0.946079	14.16	1.49186	0.578939
14.18	2.71864	1.20559	14.18	1.56673	0.789653
14.2	2.61374	0.986591	14.2	1.7227	0.765062
14.22	2.64764	1.22636	14.22	1.62184	0.620195
14.24	2.51106	1.0754	14.24	1.63737	0.793274
14.26	2.51346	1.21176	14.26	1.61762	0.754629
14.28	2.61408	1.19417	14.28	1.57068	0.753511
14.3	2.69907	0.888585	14.3	1.69439	0.626811
14.32	2.54712	0.881472	14.32	1.63558	0.652355
14.34	2.71204	1.1562	14.34	1.69251	0.799208
14.36	2.684	0.807795	14.36	1.79066	0.865038
14.38	2.69845	0.945626	14.38	1.76762	0.891478
14.4	2.86955	0.868445	14.4	1.76948	0.608742
14.42	2.69628	0.908386	14.42	1.65298	0.841006
14.44	2.53827	1.0784	14.44	1.61302	0.981451
14.46	2.52485	1.13665	14.46	1.57623	0.902681
14.48	2.41583	0.774613	14.48	1.59472	0.94542
14.5	2.38534	0.888377	14.5	1.68907	0.917007
14.52	2.44082	1.04844	14.52	1.74124	0.929979
14.54	2.31248	0.985147	14.54	1.7549	0.978714
14.56	2.38172	1.12858	14.56	1.80292	0.909513
14.58	2.49946	1.02719	14.58	1.78847	0.925971
14.6	2.53365	0.936099	14.6	1.78031	0.819636
14.62	2.42326	0.963521	14.62	1.67115	0.672182
14.64	2.50795	0.819652	14.64	1.70636	0.713164
14.66	2.5773	1.16897	14.66	1.68668	0.950168
14.68	2.51978	1.181	14.68	1.84104	0.944049
14.7	2.50837	1.16331	14.7	1.65174	0.823576
14.72	2.54701	1.00986	14.72	1.69146	0.757544
14.74	2.63613	0.817722	14.74	1.64495	0.895591
14.76	2.54783	0.895652	14.76	1.60376	0.792544
14.78	2.41974	0.947445	14.78	1.67967	0.906999
14.8	2.60766	1.22284	14.8	1.66227	0.980018
14.82	2.63862	0.733337	14.82	1.63815	0.612023
14.84	2.58111	0.976223	14.84	1.60569	0.974604
14.86	2.56492	0.898929	14.86	1.68386	0.925088
14.88	2.70635	1.14384	14.88	1.79002	0.929486
14.9	2.80157	1.00794	14.9	1.70032	0.950012
14.92	2.70721	0.906059	14.92	1.64157	0.959996
14.94	2.78721	1.07747	14.94	1.63765	0.987039
14.96	2.85207	1.13208	14.96	1.71738	0.987426
14.98	2.96539	1.1348	14.98	1.57984	0.985501
15	3.01816	1.10206	15	1.73497	0.964078
15.02	2.91651	1.25552	15.02	1.6707	0.991606
15.04	2.92028	0.916676	15.04	1.66958	1.01124
15.06	2.794	0.942803	15.06	1.66581	0.992364
15.08	2.88246	0.687435	15.08	1.63577	0.952681
15.1	2.99265	0.954406	15.1	1.68825	0.7562
15.12	2.73687	0.851767	15.12	1.79286	0.620385
15.14	2.81613	1.26336	15.14	1.86385	0.607345
15.16	2.9216	0.71812	15.16	1.91214	0.589113
15.18	2.78649	0.960296	15.18	1.92315	0.996112
15.2	2.71397	1.26674	15.2	1.84667	0.622828
15.22	2.68948	0.896781	15.22	1.81207	0.932443
15.24	2.79483	1.15397	15.24	1.88841	0.950636
15.26	2.58111	1.00318	15.26	1.99138	0.768093
15.28	2.54091	1.19658	15.28	1.86522	1.02691
15.3	2.58276	1.25632	15.3	1.83558	0.831653
15.32	2.62884	1.00116	15.32	1.72342	0.809049
15.34	2.6851	1.03997	15.34	1.84905	0.787343
15.36	2.63811	0.805174	15.36	1.70974	0.749219
15.38	2.68268	1.04451	15.38	1.79631	0.732938
15.4	2.6994	0.868425	15.4	1.77283	0.687047
15.42	2.81904	0.952032	15.42	1.79001	0.741309
15.44	2.63787	0.986424	15.44	1.72275	0.826275
15.46	2.72128	0.87575	15.46	1.71664	0.931808
15.48	2.76808	1.10116	15.48	1.7724	0.81832
15.5	2.86465	0.901048	15.5	1.86231	0.980866
15.52	2.88302	1.10389	15.52	1.93619	0.965087
15.54	2.69644	0.804108	15.54	1.90887	0.969683
15.56	2.71595	0.963997	15.56	1.8662	0.903096
15.58	2.60319	1.01171	15.58	1.75329	0.995975
15.6	2.71296	1.11798	15.6	1.73811	0.9668
15.62	2.64976	0.971053	15.62	1.83152	1.00544
15.64	2.57922	1.12101	15.64	1.83407	1.05005
15.66	2.60904	0.959808	15.66	1.82235	0.916026
15.68	2.65887	0.768631	15.68	1.7516	0.98872
15.7	2.72111	0.944623	15.7	1.8242	0.926304
15.72	2.57716	0.997254	15.72	1.83549	0.928563
15.74	2.50257	0.951007	15.74	1.80099	0.963795
15.76	2.55023	1.17116	15.76	1.85825	0.795796
15.78	2.47613	0.980845	15.78	1.80613	0.773743
15.8	2.45136	1.0175	15.8	1.84919	0.755557
15.82	2.38733	1.10416	15.82	1.75922	0.953408
15.84	2.53094	0.952887	15.84	1.76016	0.951103
15.86	2.63534	1.10035	15.86	1.6314	0.972312
15.88	2.46699	1.107	15.88	1.684	1.07835
15.9	2.47943	0.863236	15.9	1.59753	0.872141
15.92	2.45947	0.852399	15.92	1.87682	0.954778
15.94	2.50262	0.910285	15.94	1.77546	0.762176
15.96	2.60968	1.05005	15.96	1.83418	0.938082
15.98	2.736	1.0354	15.98	1.76075	0.742796
16	2.69972	0.933127	16	1.78614	0.781027
16.02	2.65713	1.0445	16.02	1.77039	0.530124
16.04	2.43336	0.977193	16.04	1.74094	0.960551
16.06	2.48563	0.986717	16.06	1.74194	0.994659
16.08	2.46937	1.04283	16.08	1.8368	1.00545
16.1	2.60785	0.914741	16.1	1.9475	0.977089
16.12	2.74108	1.13732	16.12	1.9207	0.704555
16.14	2.76704	1.1477	16.14	1.9329	0.750788
16.16	2.56626	1.22317	16.16	2.02204	0.753009
16.18	2.56569	1.19886	16.18	1.77392	0.918888
16.2	2.45476	1.12129	16.2	1.81713	1.00032
16.22	2.5283	0.995832	16.22	1.76817	0.942771
16.24	2.2874	0.618797	16.24	1.75967	0.960818
16.26	2.40907	0.67168	16.26	1.83848	0.978956
16.28	2.46755	0.81885	16.28	1.97379	0.986664
16.3	2.44823	0.795258	16.3	1.86253	1.00187
16.32	2.52122	0.915409	16.32	1.86114	0.985899
16.34	2.55051	0.885793	16.34	1.79439	0.934652
16.36	2.70547	0.747901	16.36	1.76691	0.961294
16.38	2.57291	1.02784	16.38	1.87649	0.582834
16.4	2.45356	0.771045	16.4	1.76263	0.575141
16.42	2.35235	0.668521	16.42	1.86875	0.695015
16.44	2.36256	0.734714	16.44	1.94935	1.01098
16.46	2.48985	0.924991	16.46	1.79302	0.739602
16.48	2.44916	1.05743	16.48	1.83401	0.941651
16.5	2.42842	0.997919	16.5	1.80392	0.541345
16.52	2.49347	0.632257	16.52	1.86668	0.641189
16.54	2.45212	0.61728	16.54	1.957	0.581815
16.56	2.59071	1.1231	16.56	1.96789	0.61012
16.58	2.60898	1.00997	16.58	1.93335	0.726518
16.6	2.56719	0.926403	16.6	1.91254	0.804565
16.62	2.51121	0.659822	16.62	1.96058	0.780339
16.64	2.5291	0.800893	16.64	1.87176	0.777425
16.66	2.69236	0.679457	16.66	1.86858	0.76575
16.68	2.67699	0.991292	16.68	1.81514	0.837088
16.7	2.47035	1.19193	16.7	1.7719	0.928779
16.72	2.76943	1.03947	16.72	1.84227	1.00892
16.74	2.80239	1.14396	16.74	1.81989	0.964056
16.76	2.89251	1.05852	16.76	1.88568	0.799984
16.78	2.83468	1.15248	16.78	1.93438	1.00858
16.8	2.81986	1.04799	16.8	1.88116	0.987208
16.82	2.63607	1.10053	16.82	1.97268	1.04699
16.84	2.66454	1.08129	16.84	1.9743	0.728074
16.86	2.74368	0.82231	16.86	1.86774	0.571271
16.88	2.88867	0.848455	16.88	1.91551	0.786667
16.9	2.7024	0.87585	16.9	1.85558	0.647894
16.92	2.64304	1.18695	16.92	1.9979	1.01747
16.94	2.44915	1.10307	16.94	1.76973	0.932694
16.96	2.34112	1.10311	16.96	1.85091	0.884659
16.98	2.41818	0.824928	16.98	1.80856	0.868629
17	2.32932	0.824228	17	1.97567	1.01751
17.02	2.48111	0.757638	17.02	1.87588	0.990721
17.04	2.54865	0.661537	17.04	1.88284	0.756758
17.06	2.47398	0.991963	17.06	1.92452	0.779176
17.08	2.57114	1.15768	17.08	1.91971	0.990031
17.1	2.71143	1.03481	17.1	2.04111	1.01517
17.12	2.78609	1.11084	17.12	1.95019	0.939254
17.14	3.09348	1.1753	17.14	1.86641	0.769759
17.16	2.8987	0.931573	17.16	1.76165	0.78965
17.18	2.96677	0.884906	17.18	1.84889	0.933895
17.2	3.10086	0.931941	17.2	2.0235	0.950056
17.22	3.12708	1.19161	17.22	1.83099	0.906635
17.24	3.01161	1.04592	17.24	1.95893	0.750044
17.26	2.83629	0.849669	17.26	1.84719	0.796952
17.28	2.9875	0.704306	17.28	1.84627	0.742663
17.3	2.93191	0.725788	17.3	1.94294	0.752185
17.32	3.00601	1.01332	17.32	1.85786	0.645802
17.34	2.98862	1.01632	17.34	1.73599	0.701573
17.36	2.90645	0.876622	17.36	1.82389	0.923447
17.38	3.09776	0.848143	17.38	1.90717	0.974024
17.4	2.93357	0.961432	17.4	1.80429	0.974243
17.42	2.88838	0.972754	17.42	1.98846	0.98792
17.44	3.12883	0.846687	17.44	1.82859	0.972774
17.46	3.19591	0.978001	17.46	1.83004	0.896216
17.48	3.16201	1.11572	17.48	1.86334	0.868278
17.5	2.96638	0.801556	17.5	1.79257	0.777732
17.52	2.97986	1.08198	17.52	1.6444	0.995458
17.54	2.95191	0.94125	17.54	1.70576	1.00505
17.56	2.97371	1.05523	17.56	1.6971	0.986808
17.58	2.83709	0.910912	17.58	1.77254	0.984204
17.6	2.83045	0.835357	17.6	1.8076	0.584398
17.62	2.90429	0.798219	17.62	1.88744	0.973004
17.64	2.94499	1.0273	17.64	1.84713	0.945313
17.66	2.9578	0.797018	17.66	1.81388	0.987846
17.68	3.05144	0.899735	17.68	1.85021	1.01563
17.7	3.11194	0.502563	17.7	1.81214	0.936822
17.72	3.0989	0.695569	17.72	1.80047	0.967052
17.74	3.24435	0.715777	17.74	1.80703	0.934316
17.76	3.33373	0.797357	17.76	1.9426	0.739061
17.78	3.2348	0.977173	17.78	1.88113	0.807273
17.8	3.10524	0.828767	17.8	1.86567	0.806618
17.82	3.29906	0.767609	17.82	1.83838	0.757202
17.84	3.26477	1.14663	17.84	1.94011	0.815083
17.86	3.12506	0.840579	17.86	1.91226	0.779603
17.88	3.30805	1.06289	17.88	1.9631	0.811681
17.9	3.5423	1.13733	17.9	1.95908	0.649909
17.92	3.60929	0.986869	17.92	1.88524	0.882559
17.94	3.73469	0.897582	17.94	1.83498	0.811937
17.96	3.55672	1.00821	17.96	1.856	0.787782
17.98	3.54563	0.878617	17.98	1.91453	0.770787
18	3.56277	0.671387	18	1.90852	0.934287
18.02	3.59809	0.932746	18.02	1.92507	0.945354
18.04	3.6911	0.904532	18.04	1.84482	0.873853
18.06	3.50379	1.20364	18.06	2.02392	0.977435
18.08	3.70862	1.16964	18.08	1.98604	0.902982
18.1	3.55243	0.962902	18.1	1.94127	0.946082
18.12	3.64325	0.825803	18.12	1.99593	0.946275
18.14	3.89166	0.69864	18.14	1.96202	0.924114
18.16	3.83699	1.02927	18.16	2.02421	0.918788
18.18	3.88055	1.13108	18.18	2.14561	0.931198
18.2	4.02106	1.11489	18.2	2.13165	0.921621
18.22	4.11019	1.17644	18.22	2.13567	0.909657
18.24	4.15101	1.03703	18.24	2.00925	0.943487
18.26	4.39352	1.10387	18.26	2.03035	0.953196
18.28	4.07324	1.12243	18.28	1.90389	0.946001
18.3	4.17918	0.841276	18.3	2.0541	0.957636
18.32	4.18019	1.04275	18.32	2.0664	0.578921
18.34	4.18041	1.14188	18.34	1.96195	0.574048
18.36	4.46911	1.0999	18.36	1.93559	0.96646
18.38	4.37788	1.19987	18.38	1.97399	0.96636
18.4	4.24281	0.921129	18.4	1.83815	0.947227
18.42	4.01587	0.699162	18.42	1.95317	0.871992
18.44	4.23707	0.918868	18.44	1.98861	0.922593
18.46	4.01819	0.613095	18.46	2.07344	0.980172
18.48	4.00069	1.13913	18.48	2.13085	0.982951
18.5	4.04122	1.02032	18.5	2.04469	0.927967
18.52	4.07794	0.840633	18.52	2.01001	0.980606
18.54	4.12731	0.84053	18.54	2.07092	0.610437
18.56	4.0518	0.849329	18.56	2.04373	0.933519
18.58	4.11685	0.831858	18.58	2.00486	0.763878
18.6	4.2053	0.638139	18.6	1.96091	0.870414
18.62	4.20973	0.710821	18.62	2.08097	0.986776
18.64	4.04929	1.31808	18.64	1.93624	1.00959
18.66	3.89813	1.082	18.66	1.85082	0.959683
18.68	3.8324	0.950607	18.68	1.989	0.874659
18.7	3.9081	1.17699	18.7	1.89132	0.972521
18.72	3.66687	1.03283	18.72	1.95189	0.99396
18.74	3.63749	0.886052	18.74	1.9467	0.612239
18.76	3.78239	0.924983	18.76	1.99335	0.626565
18.78	3.84784	0.717483	18.78	2.03318	0.769344
18.8	3.93418	0.852745	18.8	1.97488	0.749256
18.82	3.90753	0.927396	18.82	1.94299	0.971359
18.84	3.82016	1.15963	18.84	1.9068	0.893835
18.86	3.81691	1.18566	18.86	1.83298	1.0161
18.88	3.91115	1.02268	18.88	1.87773	1.01605
18.9	3.98853	0.728044	18.9	1.83572	0.817869
18.92	3.83754	0.850865	18.92	1.89154	0.926328
18.94	3.77695	0.846853	18.94	1.96574	0.959383
18.96	4.03878	0.909771	18.96	2.00156	0.894415
18.98	3.9931	1.04946	18.98	1.97525	0.917571
19	3.85991	1.05856	19	1.9971	0.927678
19.02	4.02859	1.25985	19.02	1.93146	0.79316
19.04	4.07366	0.718723	19.04	1.83885	0.907116
19.06	4.16639	0.79415	19.06	1.93521	0.798293
19.08	4.1028	0.867298	19.08	2.06187	0.79649
19.1	4.00377	0.808749	19.1	2.01323	0.937162
19.12	3.92549	0.744698	19.12	1.93395	0.919893
19.14	3.89161	0.723724	19.14	2.03947	0.661249
19.16	3.99975	0.841951	19.16	1.93273	0.845038
19.18	3.98694	0.980951	19.18	1.92745	0.785323
19.2	3.92716	0.820871	19.2	1.92878	0.820633
19.22	4.06603	0.975346	19.22	2.04184	0.716567
19.24	4.05851	0.810305	19.24	1.98859	0.914662
19.26	3.90421	0.81313	19.26	2.0517	0.715952
19.28	3.77541	1.2525	19.28	2.10452	0.960149
19.3	3.63581	0.987502	19.3	2.00089	0.943448
19.32	3.60913	0.874578	19.32	2.06357	0.915409
19.34	3.52478	0.911607	19.34	1.94214	0.958345
19.36	3.64747	0.836174	19.36	2.04086	1.01005
19.38	3.68061	0.576888	19.38	2.00327	0.975854
19.4	3.73199	0.691912	19.4	2.09904	0.979926
19.42	3.73363	0.873568	19.42	2.22146	0.93845
19.44	3.6025	0.911201	19.44	2.0324	0.972465
19.46	3.56804	0.838694	19.46	2.0542	0.998681
19.48	3.28863	0.83336	19.48	2.13902	0.962047
19.5	3.25722	1.08083	19.5	1.89545	0.859472
19.52	3.25789	0.845231	19.52	1.93793	0.853892
19.54	3.20522	0.826259	19.54	1.99469	1.01463
19.56	3.29295	0.888786	19.56	2.03542	0.961044
19.58	3.33504	0.774664	19.58	2.14333	0.934841
19.6	3.436	0.576137	19.6	2.24957	0.937136
19.62	3.4235	0.808697	19.62	2.13147	0.988262
19.64	3.39182	0.887043	19.64	2.16018	0.927883
19.66	3.41912	1.15361	19.66	2.00779	1.03618
19.68	3.33717	1.01971	19.68	2.0914	0.90661
19.7	3.37547	0.809941	19.7	2.15256	0.964876
19.72	3.27038	0.830341	19.72	2.04899	0.911329
19.74	3.23407	0.859345	19.74	2.11697	0.972537
19.76	3.34605	0.971853	19.76	2.13175	0.967352
19.78	3.38452	0.886249	19.78	2.13146	0.951969
19.8	3.31791	0.903117	19.8	2.23958	0.98206
19.82	3.48858	0.903666	19.82	2.1406	0.939687
19.84	3.51758	0.927278	19.84	2.35628	0.884113
19.86	3.46271	1.02379	19.86	2.27671	0.861329
19.88	3.63153	0.756893	19.88	2.15249	0.973841
19.9	3.66074	1.01853	19.9	2.20239	0.850031
19.92	3.44704	0.875686	19.92	2.27287	0.674604
19.94	3.64267	0.827492	19.94	2.22438	0.95682
19.96	3.67856	0.87304	19.96	2.21271	1.02258
19.98	3.31097	0.725254	19.98	2.29475	1.05189
20	3.61508	0.853275	20	2.16045	0.90745
20.02	3.65562	0.893152	20.02	2.22752	0.984879
20.04	3.66857	0.747196	20.04	2.15425	0.711913
20.06	3.54441	0.824337	20.06	2.18349	0.81939
20.08	3.58881	0.869062	20.08	2.21083	0.801128
20.1	3.60307	0.77015	20.1	2.32527	0.768108
20.12	3.54656	1.01104	20.12	2.08719	0.99973
20.14	3.42024	1.055	20.14	2.18496	0.930855
20.16	3.39582	1.21298	20.16	2.24347	0.997132
20.18	3.28655	0.859957	20.18	2.10256	0.916569
20.2	3.20703	0.646086	20.2	2.22224	1.0062
20.22	3.1528	0.861989	20.22	2.24648	0.826133
20.24	3.26816	0.923339	20.24	2.25311	0.831965
20.26	3.1896	0.864735	20.26	2.11064	0.81181
20.28	3.33439	0.803159	20.28	2.10798	0.757988
20.3	3.02889	0.794926	20.3	2.27414	0.832801
20.32	3.06296	0.852497	20.32	2.39668	0.819618
20.34	3.11101	0.710055	20.34	2.33011	0.854159
20.36	3.05503	0.842445	20.36	2.14752	0.607861
20.38	3.14789	0.92036	20.38	2.21918	0.854016
20.4	3.06959	0.80255	20.4	1.96455	0.787829
20.42	3.09704	0.851277	20.42	2.07412	0.887609
20.44	2.98913	0.911376	20.44	2.24022	0.837974
20.46	2.97874	0.881521	20.46	2.26142	0.832057
20.48	3.29039	1.0562	20.48	2.21787	0.84
20.5	3.04379	0.954864	20.5	2.10685	0.766301
20.52	3.11105	0.738629	20.52	2.2742	0.794673
20.54	3.08768	0.778648	20.54	2.08157	0.734682
20.56	3.29834	0.82532	20.56	2.14474	0.83003
20.58	3.47325	0.953645	20.58	2.10876	0.817991
20.6	3.49568	1.16829	20.6	2.06257	0.905627
20.62	3.34269	1.14783	20.62	2.15154	0.855293
20.64	3.56851	0.829238	20.64	2.07217	0.851273
20.66	3.51018	1.11691	20.66	2.21497	0.856254
20.68	3.45803	0.918851	20.68	1.9602	0.849363
20.7	3.4018	1.00773	20.7	2.0537	0.79895
20.72	3.64374	0.966395	20.72	2.09897	0.735863
20.74	3.44002	0.810406	20.74	1.92395	0.746345
20.76	3.53597	0.569788	20.76	2.03262	0.806773
20.78	3.4121	0.751764	20.78	2.04116	0.603867
20.8	3.4969	0.855575	20.8	2.0749	0.827507
20.82	3.31787	0.785602	20.82	2.00744	0.786091
20.84	3.23027	0.830835	20.84	2.19908	0.786143
20.86	3.26669	0.94678	20.86	2.13173	0.818831
20.88	3.31062	0.863149	20.88	2.13206	0.827903
20.9	3.08792	0.838119	20.9	2.22824	0.578744
20.92	3.07974	0.865774	20.92	1.996	0.328095
20.94	2.73999	1.02136	20.94	1.99345	0.568772
20.96	2.9096	1.20386	20.96	2.08945	0.5432
20.98	2.94298	0.88548	20.98	2.09678	0.786917
21	2.85479	0.910464	21	2.11344	0.81466
21.02	2.73308	0.764409	21.02	2.00003	0.8306
21.04	2.76257	0.653054	21.04	2.0593	0.829079
21.06	2.79638	0.792416	21.06	2.06245	0.807218
21.08	2.71576	1.0521	21.08	2.06579	0.815571
21.1	2.68718	1.07649	21.1	1.94194	0.75938
21.12	2.6584	1.21587	21.12	1.91028	0.791211
21.14	2.72699	1.0785	21.14	1.95256	0.799894
21.16	2.60322	0.798043	21.16	2.04331	0.768648
21.18	2.63356	0.81148	21.18	1.93559	0.824843
21.2	2.51476	0.901401	21.2	2.12115	0.815627
21.22	2.37505	0.841688	21.22	2.26699	0.906237
21.24	2.35337	0.765745	21.24	2.12873	0.960577
21.26	2.43587	0.855025	21.26	2.07366	0.842357
21.28	2.39746	0.708233	21.28	2.03791	0.823074
21.3	2.42298	0.645022	21.3	1.92825	0.841477
21.32	2.48305	1.0029	21.32	1.98764	0.782359
21.34	2.39131	0.699215	21.34	2.04372	0.779631
21.36	2.52119	0.944801	21.36	2.13056	0.859222
21.38	2.41323	1.06679	21.38	2.02453	0.854898
21.4	2.50323	1.06004	21.4	2.10004	0.846437
21.42	2.63778	0.814254	21.42	2.18935	0.787665
21.44	2.54614	0.804623	21.44	2.36032	0.73666
21.46	2.65833	0.655546	21.46	2.35968	0.581154
21.48	2.76745	0.838301	21.48	2.26896	0.647296
21.5	2.66362	0.803786	21.5	2.20297	0.783486
21.52	2.84304	0.864453	21.52	2.18358	0.772353
21.54	2.88626	1.16639	21.54	2.11341	0.76301
21.56	2.88512	0.961415	21.56	2.07662	0.923644
21.58	2.93671	1.25035	21.58	2.09077	0.839763
21.6	2.96769	1.07281	21.6	2.21473	0.816056
21.62	2.85326	1.14399	21.62	2.14607	0.776939
21.64	2.85526	0.915547	21.64	2.05373	0.796969
21.66	2.84287	1.01115	21.66	2.00384	0.768845
21.68	2.81263	0.989185	21.68	2.11262	0.795952
21.7	2.93051	0.925683	21.7	2.30701	0.867084
21.72	2.96505	0.630184	21.72	2.18281	0.793659
21.74	3.08833	0.929284	21.74	2.14854	0.860107
21.76	3.02826	1.0003	21.76	2.22911	0.835161
21.78	3.04607	1.05993	21.78	2.08275	0.74203
21.8	2.91657	1.0599	21.8	2.12212	0.712862
21.82	2.7877	1.15044	21.82	2.04113	0.836879
21.84	2.92401	1.09853	21.84	1.97307	0.838563
21.86	3.09121	1.1772	21.86	2.1875	0.807752
21.88	3.03617	1.10778	21.88	2.24185	0.835779
21.9	3.05021	1.21364	21.9	2.22269	0.609067
21.92	2.99991	1.2331	21.92	2.21389	0.59653
21.94	2.95002	1.16432	21.94	2.28318	0.616306
21.96	2.95259	1.16635	21.96	2.341	0.863861
21.98	2.83362	1.02527	21.98	2.23787	0.625436
22	3.03247	0.98431	22	2.29684	0.608586
22.02	3.0916	1.02322	22.02	2.26167	0.799674
22.04	3.04443	1.05822	22.04	2.14519	0.64475
22.06	2.92752	1.03162	22.06	2.39507	0.591081
22.08	3.09178	0.88734	22.08	2.495	0.853471
22.1	2.96057	0.722729	22.1	2.33828	0.862965
22.12	3.03534	0.753893	22.12	2.33345	0.398547
22.14	3.08726	0.690519	22.14	2.27045	0.815121
22.16	2.9432	1.04434	22.16	2.32669	0.838285
22.18	2.92942	1.03819	22.18	2.24217	0.886637
22.2	3.00398	1.23217	22.2	2.17296	0.791332
22.22	3.05861	1.17883	22.22	2.34499	0.745372
22.24	2.96663	1.19481	22.24	2.24462	0.83898
22.26	3.11638	1.2188	22.26	2.30439	0.644834
22.28	3.11125	1.06471	22.28	2.22625	0.582647
22.3	3.26832	1.2585	22.3	2.11566	0.949561
22.32	3.23506	1.05376	22.32	2.10361	0.893895
22.34	3.06779	0.935446	22.34	2.23983	0.711981
22.36	2.94381	1.11713	22.36	2.06866	0.923136
22.38	3.00973	0.846656	22.38	2.17305	0.731933
22.4	2.96347	0.999201	22.4	2.09172	0.746284
22.42	3.00349	1.07244	22.42	2.18104	0.514401
22.44	2.95485	0.914338	22.44	2.187	0.599349
22.46	2.94821	1.06051	22.46	2.2037	0.583682
22.48	2.8011	1.04615	22.48	2.24586	0.511119
22.5	2.82567	1.01209	22.5	2.36234	0.97743
22.52	2.69275	1.26197	22.52	2.39806	0.944998
22.54	2.88399	1.27405	22.54	2.40131	0.868826
22.56	2.77564	1.21311	22.56	2.32162	0.86423
22.58	2.6726	1.15078	22.58	2.25011	0.889098
22.6	2.79399	1.09575	22.6	2.12733	0.873155
22.62	2.71749	1.20121	22.62	2.1968	0.929548
22.64	2.81664	1.0647	22.64	2.11485	0.889689
22.66	2.63924	1.18044	22.66	2.25252	0.702372
22.68	2.69769	0.820174	22.68	2.52367	0.70455
22.7	2.59483	1.18257	22.7	2.39285	0.726378
22.72	2.61222	1.27606	22.72	2.21784	0.775635
22.74	2.66116	1.18801	22.74	2.32404	0.722883
22.76	2.70929	1.02015	22.76	2.33376	0.632462
22.78	2.88441	0.848151	22.78	2.42955	0.859306
22.8	3.15046	0.865677	22.8	2.33535	0.881942
22.82	3.21335	1.13831	22.82	2.39263	0.873719
22.84	3.24157	0.957997	22.84	2.33925	0.860059
22.86	3.27904	1.07446	22.86	2.39717	0.853754
22.88	3.16556	0.869486	22.88	2.31767	0.936526
22.9	3.05096	0.986565	22.9	2.19524	0.874388
22.92	2.827	1.19974	22.92	2.13037	0.918378
22.94	2.93531	0.835263	22.94	2.0828	0.856531
22.96	2.94777	0.742385	22.96	2.33094	0.888893
22.98	3.1267	0.996207	22.98	2.40352	0.92417
23	2.80927	0.827307	23	2.49882	0.75224
23.02	2.83494	1.27683	23.02	2.44856	0.916863
23.04	2.93869	0.912545	23.04	2.40385	0.924293
23.06	2.83752	0.974898	23.06	2.48422	0.765809
23.08	2.94428	0.929204	23.08	2.39563	0.605813
23.1	3.09243	0.962486	23.1	2.19409	0.886992
23.12	2.92684	1.05111	23.12	2.25893	0.879891
23.14	2.91625	0.928378	23.14	2.38409	0.916844
23.16	2.77144	0.995806	23.16	2.31225	0.939178
23.18	2.75881	0.931144	23.18	2.30413	0.886288
23.2	2.76148	0.794651	23.2	2.37683	0.512743
23.22	2.74192	1.07002	23.22	2.41137	0.606157
23.24	2.79282	1.05476	23.24	2.34462	0.535447
23.26	2.68243	0.937168	23.26	2.30284	0.7488
23.28	2.69542	0.810631	23.28	2.25424	0.762578
23.3	2.71276	1.03687	23.3	2.24716	0.53415
23.32	2.70311	0.931627	23.32	2.3518	0.830229
23.34	2.84137	0.710318	23.34	2.2806	0.916682
23.36	3.21885	0.846812	23.36	2.15308	0.74162
23.38	3.06309	0.838447	23.38	2.243	0.752548
23.4	3.09059	0.948496	23.4	2.39596	0.76461
23.42	3.04585	0.953355	23.42	2.44077	0.741107
23.44	3.05935	0.888594	23.44	2.30804	0.88259
23.46	3.11664	0.856128	23.46	2.27263	0.886731
23.48	2.90311	0.93856	23.48	2.25701	0.890035
23.5	2.80845	0.990546	23.5	2.44844	0.907363
23.52	2.7528	0.86243	23.52	2.43915	0.886366
23.54	2.63538	1.0982	23.54	2.40038	0.732119
23.56	2.829	1.10038	23.56	2.72075	0.940035
23.58	2.80924	1.13674	23.58	2.43209	0.874083
23.6	2.78354	0.923357	23.6	2.47602	0.885218
23.62	2.71542	0.806312	23.62	2.33976	0.579746
23.64	2.57142	1.08657	23.64	2.5476	0.723823
23.66	2.53488	1.04151	23.66	2.42501	0.605788
23.68	2.48505	1.13635	23.68	2.37804	0.713226
23.7	2.56321	1.19855	23.7	2.48418	0.623236
23.72	2.47583	1.17016	23.72	2.59809	0.673245
23.74	2.48604	0.929595	23.74	2.50901	0.660278
23.76	2.38075	0.938357	23.76	2.40609	0.910319
23.78	2.4908	0.859315	23.78	2.40098	0.781606
23.8	2.45383	1.12162	23.8	2.38219	0.709376
23.82	2.50188	0.976459	23.82	2.43744	0.599784
23.84	2.47619	1.10128	23.84	2.50072	0.903107
23.86	2.4693	1.04865	23.86	2.4719	0.856913
23.88	2.35658	1.05452	23.88	2.49433	0.930414
23.9	2.44726	1.24721	23.9	2.45992	0.689742
23.92	2.54333	1.10279	23.92	2.4199	0.682707
23.94	2.49392	1.16261	23.94	2.33278	0.870586
23.96	2.6149	1.02047	23.96	2.31292	0.938622
23.98	2.56037	1.14173	23.98	2.29492	0.927315
24	2.60316	1.26629	24	2.34862	0.922386
24.02	2.53293	0.968656	24.02	2.34499	0.611339
24.04	2.537	1.0435	24.04	2.32182	0.915707
24.06	2.69885	0.813652	24.06	2.31636	0.960277
24.08	2.61717	0.993173	24.08	2.35247	0.861212
24.1	2.49509	1.09863	24.1	2.2886	0.863394
24.12	2.54566	1.14228	24.12	2.3363	0.72094
24.14	2.54187	1.07125	24.14	2.31311	0.736039
24.16	2.56928	1.04488	24.16	2.2442	0.570261
24.18	2.52572	1.10666	24.18	2.24005	0.719369
24.2	2.60647	0.762716	24.2	2.40098	0.706474
24.22	2.4396	1.04768	24.22	2.32781	0.634551
24.24	2.55329	0.926594	24.24	2.28812	0.541971
24.26	2.52191	0.791685	24.26	2.34123	0.67806
24.28	2.60663	0.811029	24.28	2.34578	0.918161
24.3	2.50922	1.1949	24.3	2.35041	0.514199
24.32	2.64946	1.14711	24.32	2.22265	0.7645
24.34	2.62008	0.957354	24.34	2.3328	0.988738
24.36	2.58987	0.901096	24.36	2.33816	0.966115
24.38	2.61361	0.962592	24.38	2.33694	0.87696
24.4	2.6525	0.786725	24.4	2.39706	0.870089
24.42	2.57306	1.13706	24.42	2.22896	0.922628
24.44	2.72224	0.951524	24.44	2.19289	0.912998
24.46	2.60853	1.34547	24.46	2.34039	0.943973
24.48	2.7524	1.12748	24.48	2.37671	0.946814
24.5	2.8128	0.740559	24.5	2.38615	0.625643
24.52	2.83347	0.953895	24.52	2.3903	0.881781
24.54	2.72807	0.863518	24.54	2.40583	0.9057
24.56	2.72992	0.958556	24.56	2.39497	0.951074
24.58	2.70483	0.871727	24.58	2.42072	0.913556
24.6	2.68429	0.82198	24.6	2.28643	0.913285
24.62	2.73923	1.11261	24.62	2.1906	0.947225
24.64	2.82392	1.09555	24.64	2.42149	0.953844
24.66	2.85538	1.03093	24.66	2.41035	0.932893
24.68	2.8125	0.819438	24.68	2.3867	0.866405
24.7	2.54826	0.886274	24.7	2.47598	0.915457
24.72	2.62088	0.917002	24.72	2.45555	0.561384
24.74	2.66322	1.14349	24.74	2.42671	0.925046
24.76	2.7001	1.21178	24.76	2.38272	0.899897
24.78	2.71475	1.05876	24.78	2.33533	0.929384
24.8	2.84356	1.14562	24.8	2.20215	1.00542
24.82	2.83134	0.876368	24.82	2.37565	0.949554
24.84	2.82647	1.20671	24.84	2.49867	0.753022
24.86	2.79017	1.14618	24.86	2.4392	0.722036
24.88	2.66425	1.14841	24.88	2.35323	0.773949
24.9	2.72107	0.980552	24.9	2.33021	0.893865
24.92	2.86549	0.880548	24.92	2.39659	0.887056
24.94	2.794	1.07886	24.94	2.38807	0.927643
24.96	2.73751	1.06281	24.96	2.47449	0.910543
24.98	2.81535	0.727942	24.98	2.35136	0.945077
25	2.79961	0.659557	25	2.28317	0.904545
25.02	2.86387	0.86843	25.02	2.3417	0.878662
25.04	2.87758	1.03971	25.04	2.17788	0.883833
25.06	2.8672	1.16028	25.06	2.29226	0.872141
25.08	2.87419	1.00296	25.08	2.2399	0.873113
25.1	3.0583	0.879164	25.1	2.37804	0.816322
25.12	3.16198	1.01547	25.12	2.27169	0.527431
25.14	3.1942	1.06212	25.14	2.16985	0.712763
25.16	3.1988	0.973835	25.16	2.13218	0.723081
25.18	3.22685	1.01546	25.18	2.19399	0.530978
25.2	3.28579	0.881419	25.2	2.25341	0.71948
25.22	3.11332	0.771392	25.22	2.24233	0.821333
25.24	3.09552	0.977005	25.24	2.31328	0.772234
25.26	3.17741	0.941426	25.26	2.28448	0.571027
25.28	3.32719	0.924869	25.28	2.27157	0.908423
25.3	3.17279	0.958193	25.3	2.35791	0.923011
25.32	3.37814	0.995487	25.32	2.39445	0.916105
25.34	3.24304	0.994086	25.34	2.28731	0.84459
25.36	3.27056	1.03142	25.36	2.48961	0.92539
25.38	3.14378	1.23692	25.38	2.45386	0.97612
25.4	3.29825	1.07105	25.4	2.45333	0.956618
25.42	3.06075	0.99349	25.42	2.32751	0.93737
25.44	3.21558	0.99077	25.44	2.37249	0.880507
25.46	3.08689	1.21343	25.46	2.10283	0.710093
25.48	3.05189	1.17766	25.48	2.37264	0.557999
25.5	3.09886	0.998607	25.5	2.225	0.884844
25.52	3.07535	0.964994	25.52	2.39219	0.84728
25.54	3.05406	0.927489	25.54	2.44713	0.923291
25.56	3.14688	0.831845	25.56	2.24038	0.729423
25.58	3.18058	0.752621	25.58	2.19794	0.715331
25.6	3.22466	0.724233	25.6	2.28123	0.789897
25.62	3.2002	1.05189	25.62	2.45377	0.951999
25.64	3.3552	0.857003	25.64	2.18033	0.853085
25.66	3.38893	0.948503	25.66	2.25509	0.943246
25.68	3.29057	1.18244	25.68	2.26072	0.812182
25.7	3.37898	1.20904	25.7	2.16694	0.860307
25.72	3.20124	1.23628	25.72	2.22069	0.517087
25.74	3.26039	0.993655	25.74	2.14683	0.556854
25.76	3.25026	1.08021	25.76	2.27685	0.768038
25.78	3.28913	1.18899	25.78	2.25937	0.564096
25.8	3.34222	1.23714	25.8	2.27183	0.49476
25.82	3.26391	1.11644	25.82	2.24445	0.744498
25.84	3.43032	0.781951	25.84	2.16179	0.973652
25.86	3.24796	1.18097	25.86	2.09322	0.972822
25.88	3.13089	1.23276	25.88	2.24622	0.659349
25.9	3.21112	1.08389	25.9	2.36179	0.784683
25.92	3.22765	1.09235	25.92	2.20477	0.941127
25.94	3.27843	1.2771	25.94	2.16065	0.882868
25.96	3.35629	1.11229	25.96	2.19139	0.856792
25.98	3.4004	1.12321	25.98	2.09054	0.742964
26	3.24482	1.02721	26	2.16229	0.69034
26.02	3.23897	1.1569	26.02	2.23057	0.868816
26.04	3.22776	1.21064	26.04	2.27469	0.932792
26.06	3.10052	0.917741	26.06	2.353	0.914626
26.08	3.11102	0.987362	26.08	2.26606	0.873341
26.1	3.17764	0.94515	26.1	2.29724	0.92988
26.12	3.27862	1.01126	26.12	2.49385	0.856685
26.14	3.27265	0.894275	26.14	2.44268	0.867364
26.16	3.22338	1.10426	26.16	2.28734	0.85271
26.18	3.16982	1.02082	26.18	2.35609	0.922377
26.2	3.1899	1.06635	26.2	2.44898	0.944822
26.22	3.30298	1.18406	26.22	2.39149	0.97603
26.24	3.32681	1.02929	26.24	2.33441	0.795368
26.26	3.42319	0.75693	26.26	2.1912	0.964316
26.28	3.45626	1.09385	26.28	2.34558	0.998058
26.3	3.52669	1.05257	26.3	2.28381	0.926018
26.32	3.39001	0.916944	26.32	2.36694	0.916038
26.34	3.33837	0.847146	26.34	2.34586	0.9486
26.36	3.16196	1.01022	26.36	2.32769	0.971558
26.38	3.16236	1.05396	26.38	2.30794	0.923061
26.4	3.05449	1.08616	26.4	2.17839	0.937005
26.42	3.20938	0.858445	26.42	2.13476	0.907535
26.44	3.23796	1.08732	26.44	2.02269	0.944306
26.46	3.16994	0.972678	26.46	1.99301	0.87934
26.48	3.24271	0.961397	26.48	2.21182	0.911687
26.5	3.34494	1.21592	26.5	2.14577	0.864906
26.52	3.19503	0.919758	26.52	1.91182	0.915596
26.54	3.34937	0.753191	26.54	1.94412	0.887089
26.56	3.43261	0.881075	26.56	2.03794	0.923055
26.58	3.37332	0.970387	26.58	2.17215	0.949746
26.6	3.3496	1.20836	26.6	2.19949	0.882641
26.62	3.49415	1.14468	26.62	2.29844	0.891558
26.64	3.46339	1.19954	26.64	2.12781	0.864451
26.66	3.30599	1.0913	26.66	2.16032	0.898484
26.68	3.31281	1.01784	26.68	2.15389	0.84524
26.7	3.15239	1.18107	26.7	2.19439	0.942636
26.72	3.17133	0.949999	26.72	2.23306	0.843392
26.74	3.09349	1.08503	26.74	2.28807	0.876729
26.76	3.2039	0.910901	26.76	2.30362	0.905988
26.78	3.23295	1.02456	26.78	2.27848	0.872043
26.8	3.06605	1.13568	26.8	2.24861	0.897339
26.82	3.04804	1.12019	26.82	2.4412	0.905853
26.84	2.87398	0.946664	26.84	2.44473	0.941481
26.86	2.84764	1.02336	26.86	2.32384	0.915973
26.88	3.01173	1.1509	26.88	2.12686	0.941797
26.9	2.99594	1.18852	26.9	2.22149	0.977331
26.92	3.05617	1.1642	26.92	2.33716	0.910902
26.94	3.11764	1.23626	26.94	2.33508	0.852059
26.96	3.11364	1.21677	26.96	2.18561	0.900589
26.98	3.22317	1.04501	26.98	2.20358	0.882146
27	3.04801	1.09306	27	2.19076	0.983225
27.02	3.12177	0.912581	27.02	2.20112	0.964418
27.04	3.15906	0.813356	27.04	2.39654	0.895987
27.06	3.15828	0.938839	27.06	2.4785	0.870092
27.08	3.19185	1.16357	27.08	2.20664	0.897891
27.1	3.20169	1.29048	27.1	2.33128	0.911032
27.12	3.14009	0.929182	27.12	2.22726	0.920489
27.14	3.02877	0.832047	27.14	2.22949	0.923198
27.16	3.14444	1.08707	27.16	2.40609	0.98015
27.18	3.05193	1.02176	27.18	2.20377	1.00943
27.2	2.94351	1.07695	27.2	2.21834	0.850355
27.22	3.06629	0.932213	27.22	2.27541	0.960383
27.24	3.09953	0.895132	27.24	2.27638	0.931689
27.26	3.04061	0.990005	27.26	2.34851	0.974289
27.28	3.02653	0.903365	27.28	2.26045	0.946103
27.3	3.00512	0.930628	27.3	2.42147	0.925344
27.32	3.09005	1.02728	27.32	2.49685	0.927205
27.34	3.21003	0.66653	27.34	2.33354	0.894335
27.36	2.96924	1.01011	27.36	2.25617	0.879248
27.38	2.8219	0.920521	27.38	2.12717	0.963822
27.4	2.9733	0.855351	27.4	2.2643	0.984794
27.42	2.9544	0.737961	27.42	2.27375	0.887533
27.44	2.99778	0.94595	27.44	2.18779	0.904984
27.46	3.09268	0.993335	27.46	2.24595	0.953375
27.48	3.14212	0.859591	27.48	2.41834	0.879829
27.5	3.00816	0.915268	27.5	2.37423	0.952578
27.52	3.21566	0.79856	27.52	2.58306	0.950979
27.54	3.20268	1.00538	27.54	2.46096	0.944817
27.56	3.12557	0.797876	27.56	2.1969	0.910133
27.58	3.18178	1.01243	27.58	2.30882	0.916478
27.6	3.171	1.08609	27.6	2.42325	0.939061
27.62	3.24229	1.09527	27.62	2.39655	0.978445
27.64	3.16796	1.09738	27.64	2.51794	0.996986
27.66	3.40258	1.11412	27.66	2.36958	0.906364
27.68	3.16028	1.2408	27.68	2.45468	0.903961
27.7	3.34906	1.15628	27.7	2.37433	0.963811
27.72	3.17429	0.836917	27.72	2.26717	0.888299
27.74	3.3158	0.741105	27.74	2.25505	0.939393
27.76	3.34809	1.02642	27.76	2.24574	0.905632
27.78	3.18835	0.893866	27.78	2.33213	0.965185
27.8	3.11482	1.17535	27.8	2.48476	0.899059
27.82	3.03789	0.945705	27.82	2.43491	0.905378
27.84	3.16512	0.966368	27.84	2.53804	0.909348
27.86	3.02428	1.03784	27.86	2.49423	0.914771
27.88	3.07068	1.02042	27.88	2.49708	0.923601
27.9	3.07591	0.852352	27.9	2.43135	0.89776
27.92	3.08732	1.00407	27.92	2.45583	0.909116
27.94	3.12176	1.21571	27.94	2.42437	0.867772
27.96	2.93261	1.08367	27.96	2.43829	0.979211
27.98	2.99449	1.06185	27.98	2.37425	0.876883
28	2.97729	1.05037	28	2.52911	0.89348
28.02	2.91297	1.07697	28.02	2.54308	0.856644
28.04	3.00948	1.05228	28.04	2.53292	0.964742
28.06	3.06708	1.0077	28.06	2.42819	0.953947
28.08	2.98198	1.18324	28.08	2.3265	0.903125
28.1	2.93035	0.999974	28.1	2.40167	0.862039
28.12	2.94789	0.76581	28.12	2.47049	0.937644
28.14	2.95841	0.811148	28.14	2.42615	0.918373
28.16	3.03646	0.854171	28.16	2.7135	0.9582
28.18	2.99396	0.905094	28.18	2.57795	1.0321
28.2	2.92802	0.972565	28.2	2.56979	0.936827
28.22	2.90429	1.30075	28.22	2.56956	0.921294
28.24	3.08636	0.76442	28.24	2.56863	0.926518
28.26	2.98921	0.785296	28.26	2.43018	0.961203
28.28	2.9484	1.06979	28.28	2.42584	0.916654
28.3	2.81025	1.02034	28.3	2.28111	0.923586
28.32	2.97626	0.944169	28.32	2.17294	0.886526
28.34	2.97606	1.01192	28.34	2.13031	0.873435
28.36	2.90693	1.04538	28.36	2.32861	0.906763
28.38	2.85823	0.826644	28.38	2.29609	0.902243
28.4	2.7663	0.885674	28.4	2.18227	0.890499
28.42	2.66648	1.00454	28.42	2.33716	0.867264
28.44	2.52044	0.921353	28.44	2.34245	0.877605
28.46	2.63155	1.03708	28.46	2.26856	0.913029
28.48	2.62752	1.30332	28.48	2.21123	0.947841
28.5	2.53425	1.01073	28.5	2.30158	0.956609
28.52	2.63987	1.23577	28.52	2.42322	0.897169
28.54	2.58309	1.15445	28.54	2.23185	0.878465
28.56	2.64169	1.13272	28.56	2.3332	0.943905
28.58	2.6618	1.14186	28.58	2.41962	0.894638
28.6	2.62479	0.756413	28.6	2.36891	0.894242
28.62	2.64106	0.881288	28.62	2.37534	0.982336
28.64	2.92187	0.9488	28.64	2.41318	0.870022
28.66	2.77201	0.899734	28.66	2.50499	0.856484
28.68	3.01848	0.969912	28.68	2.4123	0.934976
28.7	2.91128	0.883797	28.7	2.51216	0.921769
28.72	2.90574	0.974074	28.72	2.34378	0.943103
28.74	2.78174	0.908402	28.74	2.54487	0.880202
28.76	3.00868	1.01279	28.76	2.47154	0.899005
28.78	3.11197	1.02236	28.78	2.43237	0.956207
28.8	3.13216	0.898765	28.8	2.42887	0.924134
28.82	2.97747	0.967873	28.82	2.33073	0.907188
28.84	3.08866	1.05931	28.84	2.35784	0.866173
28.86	2.8815	1.13853	28.86	2.47887	0.899139
28.88	2.96243	1.03366	28.88	2.67529	0.842827
28.9	2.96589	1.16711	28.9	2.7212	0.940831
28.92	2.96939	1.00656	28.92	2.47077	0.942201
28.94	3.07572	1.09793	28.94	2.45033	0.944342
28.96	3.19265	1.10167	28.96	2.60068	0.877517
28.98	3.17293	1.02962	28.98	2.64465	0.983993
29	3.25208	0.985413	29	2.48562	0.907569
29.02	3.12904	0.770376	29.02	2.58182	0.86743
29.04	3.08743	1.00419	29.04	2.50702	0.982814
29.06	3.04152	1.11211	29.06	2.39312	0.976012
29.08	3.19049	1.09812	29.08	2.41344	0.885934
29.1	3.21235	1.17305	29.1	2.54179	1.00595
29.12	3.30691	1.27576	29.12	2.70096	0.910613
29.14	3.15395	1.12614	29.14	2.47711	0.939743
29.16	3.13262	1.0636	29.16	2.48826	0.976361
29.18	3.11526	0.99721	29.18	2.42951	0.799597
29.2	3.0358	1.15224	29.2	2.46531	0.830371
29.22	3.05233	1.14141	29.22	2.44728	0.863211
29.24	3.16785	1.09573	29.24	2.31603	0.902935
29.26	2.86186	0.927875	29.26	2.30539	0.941252
29.28	3.07518	0.890239	29.28	2.21733	0.893622
29.3	3.10304	1.07426	29.3	2.23435	0.918228
29.32	3.16576	1.16869	29.32	2.2735	0.926874
29.34	3.08973	1.18475	29.34	2.30147	0.889302
29.36	3.02539	0.827719	29.36	2.2207	0.864542
29.38	3.18483	1.10629	29.38	2.53362	0.859532
29.4	3.07162	1.03012	29.4	2.45176	0.929492
29.42	3.20169	0.940511	29.42	2.37506	0.995568
29.44	3.25121	0.942035	29.44	2.34611	0.898725
29.46	3.15312	1.08797	29.46	2.30544	0.893665
29.48	3.31292	1.08157	29.48	2.30805	0.857488
29.5	3.1992	1.31516	29.5	2.18278	0.879347
29.52	3.15329	1.307	29.52	2.16733	0.859635
29.54	3.21583	1.26196	29.54	2.27712	0.892608
29.56	3.25513	1.16098	29.56	2.26892	0.959402
29.58	3.26527	0.835818	29.58	2.19429	0.940711
29.6	3.26059	0.944487	29.6	2.21819	0.901962
29.62	3.07056	0.965546	29.62	2.29466	0.967571
29.64	3.23496	0.995047	29.64	2.38	0.852144
29.66	3.22097	0.919473	29.66	2.45683	0.881302
29.68	3.27646	1.1031	29.68	2.42237	0.868822
29.7	3.27339	1.1771	29.7	2.31234	0.91979
29.72	3.20359	1.2012	29.72	2.20548	0.963107
29.74	3.17784	1.00682	29.74	2.38874	0.959584
29.76	3.35489	1.15782	29.76	2.36178	0.925086
29.78	3.30013	1.11726	29.78	2.42961	0.92832
29.8	3.46613	0.80973	29.8	2.49267	0.896986
29.82	3.35981	1.12859	29.82	2.44874	0.926985
29.84	3.27977	1.01	29.84	2.43597	0.885344
29.86	3.06243	1.0765	29.86	2.38282	0.954773
29.88	3.19675	0.973357	29.88	2.35523	0.919982
29.9	3.19059	0.926489	29.9	2.31536	0.901366
29.92	3.02128	0.796375	29.92	2.45714	0.885448
29.94	3.22123	0.906972	29.94	2.4394	0.854075
29.96	3.3125	1.14085	29.96	2.64908	0.966476
29.98	3.24404	0.953225	29.98	2.49266	0.87621
30	3.20206	0.837659	30	2.45481	0.823201
30.02	3.22009	1.13867	30.02	2.71005	0.89906
30.04	3.23262	1.12535	30.04	2.47971	0.922388
30.06	3.42443	1.20726	30.06	2.56164	0.879122
30.08	3.22417	1.0814	30.08	2.35227	0.864017
30.1	3.23381	1.04838	30.1	2.42936	0.873766
30.12	3.29636	1.11211	30.12	2.41542	0.823892
30.14	3.35373	1.13295	30.14	2.43726	0.971741
30.16	3.31183	0.80342	30.16	2.29321	0.907717
30.18	3.40682	1.17133	30.18	2.52955	0.689752
30.2	3.26142	1.13398	30.2	2.41589	0.886699
30.22	3.3496	1.14909	30.22	2.52152	0.876067
30.24	3.57907	1.08756	30.24	2.44306	0.886081
30.26	3.39547	0.920254	30.26	2.50061	0.846874
30.28	3.43827	0.807294	30.28	2.45732	0.894444
30.3	3.50169	1.03259	30.3	2.44898	0.867387
30.32	3.73022	0.930384	30.32	2.43668	0.907899
30.34	3.6524	0.973091	30.34	2.4055	0.980108
30.36	3.67875	1.09491	30.36	2.32162	0.912512
30.38	3.79049	0.866942	30.38	2.38541	0.938824
30.4	3.65524	1.2688	30.4	2.22457	0.935547
30.42	3.54647	1.15975	30.42	2.38392	0.982607
30.44	3.41161	1.08095	30.44	2.36253	0.915391
30.46	3.59585	1.14258	30.46	2.24287	0.913378
30.48	3.73387	1.15513	30.48	2.22176	0.92267
30.5	3.65062	1.18781	30.5	2.33144	0.911293
30.52	3.70867	1.17146	30.52	2.28685	0.957178
30.54	3.7602	1.07447	30.54	2.41405	0.876587
30.56	3.84305	1.10526	30.56	2.32941	0.864666
30.58	3.66317	1.15549	30.58	2.38211	0.915511
30.6	3.59615	1.11079	30.6	2.41432	0.992846
30.62	3.65479	1.06097	30.62	2.33685	1.07831
30.64	3.65556	1.21783	30.64	2.42729	0.956325
30.66	3.46641	1.24285	30.66	2.43798	0.978888
30.68	3.54699	1.11177	30.68	2.35377	0.910896
30.7	3.5587	1.22403	30.7	2.30233	0.916851
30.72	3.36077	1.07037	30.72	2.29916	0.896143
30.74	3.36824	1.1707	30.74	2.27814	0.930665
30.76	3.66476	1.16888	30.76	2.33987	0.937907
30.78	3.5917	1.05217	30.78	2.35097	0.938677
30.8	3.72427	1.18859	30.8	2.35764	0.884781
30.82	3.64389	1.20665	30.82	2.46643	0.942914
30.84	3.62667	1.1173	30.84	2.29266	0.89487
30.86	3.61062	1.14392	30.86	2.39971	0.914254
30.88	3.43895	1.084	30.88	2.31274	0.97282
30.9	3.64695	0.847168	30.9	2.312	0.959471
30.92	3.6373	1.11815	30.92	2.15491	0.921029
30.94	3.63597	0.951322	30.94	2.15952	0.937593
30.96	3.49758	0.982296	30.96	2.12	0.918982
30.98	3.3208	0.995893	30.98	2.37614	0.785042
31	3.48991	0.90759	31	2.31723	0.939187
31.02	3.29433	0.948806	31.02	2.38249	0.931701
31.04	3.23783	0.777132	31.04	2.37135	0.835262
31.06	3.21227	0.958887	31.06	2.24414	0.92886
31.08	3.29357	0.906078	31.08	2.49728	0.970712
31.1	3.35093	0.729272	31.1	2.47453	0.933717
31.12	3.3277	0.855018	31.12	2.23511	0.904538
31.14	3.2721	1.07752	31.14	2.23593	0.951713
31.16	3.34309	0.874911	31.16	2.32137	0.919826
31.18	3.25934	0.893617	31.18	2.30248	0.929074
31.2	3.25084	1.1099	31.2	2.31302	0.860578
31.22	3.39727	1.11489	31.22	2.38555	0.862796
31.24	3.39009	1.14551	31.24	2.27798	0.866534
31.26	3.40818	1.12524	31.26	2.28851	0.869123
31.28	3.45556	1.03978	31.28	2.17909	0.890349
31.3	3.51508	0.97226	31.3	2.19155	0.922498
31.32	3.67981	0.847889	31.32	2.20206	0.977513
31.34	3.4426	0.769398	31.34	2.06205	0.912133
31.36	3.50337	1.15845	31.36	2.09208	0.909991
31.38	3.35052	1.13637	31.38	2.03727	0.891036
31.4	3.33546	1.01666	31.4	2.14729	0.871344
31.42	3.34055	1.01325	31.42	2.09664	0.938731
31.44	3.4779	1.22126	31.44	2.04921	0.909455
31.46	3.28867	0.855688	31.46	2.07136	0.904612
31.48	3.39542	1.26161	31.48	2.13219	0.953708
31.5	3.34997	1.23146	31.5	2.15984	0.959506
31.52	3.25796	1.14517	31.52	2.10056	0.939489
31.54	3.42781	1.03744	31.54	2.23911	0.860332
31.56	3.49763	1.19844	31.56	2.26969	0.955479
31.58	3.57896	0.939857	31.58	2.23823	0.906386
31.6	3.63922	0.927729	31.6	2.37117	0.976841
31.62	3.47373	0.93591	31.62	2.43506	0.894035
31.64	3.47354	0.898909	31.64	2.42516	0.882058
31.66	3.53011	1.00242	31.66	2.38035	0.914982
31.68	3.54345	1.17791	31.68	2.48547	0.951763
31.7	3.57523	1.09104	31.7	2.37264	0.941942
31.72	3.39861	1.09088	31.72	2.35009	0.910885
31.74	3.4608	1.13012	31.74	2.26098	0.961444
31.76	3.24141	1.25581	31.76	2.42617	0.99044
31.78	3.35395	1.07648	31.78	2.34992	0.832765
31.8	3.30103	1.11262	31.8	2.2858	0.891392
31.82	3.10411	1.11483	31.82	2.31688	0.907465
31.84	3.13929	0.851785	31.84	2.54107	0.889748
31.86	3.36126	1.15099	31.86	2.22776	0.921188
31.88	3.18724	0.802137	31.88	2.26533	0.946386
31.9	3.22599	0.770193	31.9	2.26814	0.90441
31.92	3.18213	1.00966	31.92	2.25803	0.85128
31.94	3.30399	0.876695	31.94	2.25058	0.875579
31.96	3.24023	0.819329	31.96	2.05477	0.86595
31.98	3.29443	0.820478	31.98	2.20212	0.899271
32	3.27483	0.85767	32	2.22724	0.919086
32.02	3.21601	0.904338	32.02	2.23791	0.918289
32.04	3.0634	0.782296	32.04	2.23873	0.896223
32.06	3.32028	0.883414	32.06	2.11662	0.944721
32.08	3.09703	1.13867	32.08	2.15256	0.937136
32.1	3.24499	1.12366	32.1	2.09348	0.969558
32.12	3.28267	0.93529	32.12	2.09917	0.905569
32.14	3.39714	0.880916	32.14	1.96758	0.831079
32.16	3.59807	0.821166	32.16	2.09679	0.866535
32.18	3.52004	0.869741	32.18	2.07742	0.944418
32.2	3.50641	1.2659	32.2	2.23353	0.860951
32.22	3.68735	1.22231	32.22	2.25444	0.906783
32.24	3.64533	1.27767	32.24	2.18478	0.900217
32.26	3.67344	1.29495	32.26	2.04088	0.906509
32.28	3.85787	1.007	32.28	2.14407	0.912512
32.3	3.81924	1.23404	32.3	1.99463	0.928609
32.32	3.73132	1.13536	32.32	1.94237	0.924902
32.34	3.71102	1.15759	32.34	2.00709	0.963999
32.36	3.93474	1.01631	32.36	2.21425	0.946219
32.38	3.75853	0.890739	32.38	2.19456	0.919717
32.4	3.62958	1.11791	32.4	2.02989	0.889163
32.42	3.60799	0.96494	32.42	2.0861	0.959499
32.44	3.72727	0.898895	32.44	2.00817	0.949514
32.46	3.627	1.14047	32.46	1.9548	0.954082
32.48	3.48269	1.08049	32.48	2.03018	0.953726
32.5	3.40879	0.780054	32.5	2.05927	0.884433
32.52	3.50266	1.05157	32.52	2.16155	0.94676
32.54	3.66082	1.19032	32.54	2.16113	0.904348
32.56	3.8018	0.999871	32.56	2.29608	0.93891
32.58	3.61809	1.05954	32.58	2.16495	0.955672
32.6	3.81721	1.01735	32.6	2.11627	0.890616
32.62	3.65955	0.944035	32.62	2.00047	0.894326
32.64	3.62835	0.954588	32.64	2.01628	0.877734
32.66	3.75518	0.974604	32.66	2.00739	0.916099
32.68	3.63115	0.939672	32.68	1.82984	0.946426
32.7	3.70535	0.98532	32.7	1.92566	0.93421
32.72	3.74958	1.07861	32.72	1.99188	0.857622
32.74	3.79334	0.912746	32.74	2.05221	0.913885
32.76	3.7644	0.947528	32.76	1.98789	0.875719
32.78	3.78559	1.01174	32.78	1.9237	0.919416
32.8	3.77757	1.02214	32.8	2.03088	0.879656
32.82	3.80117	0.972525	32.82	1.98154	0.897311
32.84	3.90732	0.877015	32.84	2.06016	0.903267
32.86	3.9056	1.2244	32.86	1.87032	0.892738
32.88	3.7468	0.844901	32.88	1.99226	0.903461
32.9	3.76527	1.00843	32.9	2.07145	0.884167
32.92	3.72127	1.26264	32.92	2.02359	0.897053
32.94	3.6691	1.24528	32.94	1.96037	0.880856
32.96	3.57912	0.900927	32.96	2.1461	0.843143
32.98	3.50389	0.90204	32.98	2.04215	1.05199
33	3.69881	1.07514	33	2.1469	0.94022
33.02	3.55706	0.982705	33.02	2.03764	0.945976
33.04	3.56922	1.1543	33.04	2.25053	0.955166
33.06	3.43819	0.82974	33.06	2.09056	0.88151
33.08	3.35611	0.820024	33.08	2.20232	0.897362
33.1	3.50309	0.9179	33.1	2.18142	0.910757
33.12	3.61958	0.798983	33.12	2.13089	0.90455
33.14	3.57586	0.984122	33.14	2.09056	0.917021
33.16	3.56863	1.01668	33.16	2.02202	0.92643
33.18	3.79202	1.0463	33.18	2.22925	0.91038
33.2	3.8002	1.11936	33.2	2.23801	0.871968
33.22	3.75071	1.09139	33.22	2.27275	0.834574
33.24	3.78188	0.864574	33.24	2.25317	0.891696
33.26	3.73828	1.1419	33.26	2.19702	0.838812
33.28	3.834	1.13751	33.28	2.23669	0.999823
33.3	3.85565	1.04015	33.3	2.2206	0.951195
33.32	3.89802	0.99112	33.32	2.19749	0.933367
33.34	3.65188	0.889545	33.34	2.18202	0.906802
33.36	3.79143	1.26489	33.36	2.19512	0.913037
33.38	3.83967	1.2109	33.38	2.21826	0.881638
33.4	3.61225	1.00923	33.4	2.27276	0.939944
33.42	3.7044	1.20222	33.42	2.10848	0.65659
33.44	3.5625	1.24512	33.44	2.19489	0.949254
33.46	3.71253	1.34765	33.46	1.97216	0.87869
33.48	3.63956	1.1933	33.48	2.1364	0.907506
33.5	3.78696	1.13189	33.5	2.01096	0.948036
33.52	3.81984	1.23925	33.52	2.09405	0.940896
33.54	3.83534	1.21838	33.54	2.17935	0.95177
33.56	3.94324	1.31451	33.56	2.10866	0.970096
33.58	3.7864	1.19503	33.58	2.13386	0.963319
33.6	3.82111	1.02439	33.6	2.06616	0.906665
33.62	3.8787	1.33167	33.62	2.03547	0.891894
33.64	3.82993	1.09534	33.64	2.10887	0.894247
33.66	3.80495	1.15277	33.66	2.10969	0.895426
33.68	3.92336	1.23525	33.68	2.02718	0.909035
33.7	3.81416	1.08561	33.7	1.98242	0.949013
33.72	3.62477	1.31565	33.72	2.08065	0.947705
33.74	3.73437	1.24146	33.74	2.01791	0.900611
33.76	3.71864	1.10776	33.76	2.04957	0.983587
33.78	3.76802	1.28127	33.78	2.17796	1.00196
33.8	3.6611	1.16229	33.8	2.14755	0.909362
33.82	3.56556	0.950255	33.82	2.26249	0.918573
33.84	3.6686	1.13292	33.84	2.15114	0.845486
33.86	3.6764	1.32935	33.86	2.04832	0.887981
33.88	3.72142	0.970003	33.88	2.14079	0.926488
33.9	3.56845	0.799051	33.9	2.23854	0.862986
33.92	3.75918	1.25808	33.92	2.12931	0.959653
33.94	3.90819	1.15025	33.94	2.04801	1.00828
33.96	3.77356	1.04366	33.96	2.09143	0.859967
33.98	3.7607	0.690226	33.98	2.08804	0.895755
34	3.73671	1.19692	34	2.13742	0.867812
34.02	3.78244	1.2256	34.02	2.11229	0.875505
34.04	3.73238	1.30197	34.04	2.0159	0.931009
34.06	3.60985	0.989587	34.06	2.06201	0.947984
34.08	3.77829	1.04534	34.08	2.22249	0.891867
34.1	3.7248	1.05134	34.1	2.11724	0.920487
34.12	3.72137	1.02705	34.12	2.06373	0.874061
34.14	3.71448	1.25286	34.14	2.03893	0.93587
34.16	3.90077	1.03233	34.16	2.13764	0.889807
34.18	3.95219	1.07512	34.18	1.99368	0.895039
34.2	3.92013	0.939241	34.2	1.95214	0.921122
34.22	3.81991	0.913653	34.22	2.03004	0.885176
34.24	3.92962	1.15456	34.24	2.03121	0.947647
34.26	3.85489	1.25308	34.26	2.16735	0.947023
34.28	3.9815	0.909024	34.28	1.97156	1.02188
34.3	3.95805	0.924266	34.3	1.95583	0.883357
34.32	3.92938	1.19382	34.32	1.83137	0.92124
34.34	3.97501	0.879598	34.34	1.87104	0.872855
34.36	3.90261	1.05038	34.36	2.02909	0.727927
34.38	3.91833	1.10259	34.38	1.94996	0.54854
34.4	3.96881	0.840394	34.4	1.90385	0.769894
34.42	4.06742	0.725362	34.42	1.92417	0.918236
34.44	3.9492	1.18845	34.44	1.93468	0.881015
34.46	3.88596	0.849917	34.46	1.97057	0.895531
34.48	3.68863	1.05779	34.48	1.85086	0.902875
34.5	3.66122	1.04068	34.5	2.06463	0.87649
34.52	3.61696	0.874442	34.52	2.02578	0.93569
34.54	3.60181	1.10495	34.54	2.11639	0.951037
34.56	3.5676	1.00631	34.56	1.92465	0.942176
34.58	3.49829	0.933407	34.58	2.07279	0.966899
34.6	3.47943	1.00875	34.6	2.09907	0.890903
34.62	3.40754	1.12468	34.62	2.05239	0.891235
34.64	3.56974	1.16348	34.64	2.08227	0.945381
34.66	3.48387	1.13128	34.66	1.95818	0.979662
34.68	3.6095	1.04892	34.68	1.99269	0.88427
34.7	3.34286	1.05604	34.7	2.14714	0.878343
34.72	3.24328	1.28683	34.72	2.14638	0.900291
34.74	3.34632	1.17074	34.74	2.07754	0.870423
34.76	3.3381	1.12083	34.76	2.20651	0.929934
34.78	3.30188	1.18423	34.78	2.15282	0.956393
34.8	3.34015	1.07161	34.8	2.05659	0.941772
34.82	3.22904	1.08309	34.82	2.09585	0.903605
34.84	3.43134	1.15197	34.84	2.06069	0.901858
34.86	3.49606	1.07062	34.86	2.09836	0.935247
34.88	3.45858	1.26983	34.88	2.05896	0.926126
34.9	3.44508	1.14701	34.9	2.06201	0.918834
34.92	3.42531	1.18468	34.92	2.1006	0.950955
34.94	3.4092	0.716395	34.94	2.14921	0.93703
34.96	3.29647	0.879047	34.96	2.16839	0.929276
34.98	3.31162	1.24253	34.98	2.0877	0.884027
35	3.39228	1.15296	35	2.00982	0.930376
35.02	3.3513	1.16307	35.02	2.06799	0.897978
35.04	3.26707	1.09085	35.04	1.95957	0.927112
35.06	3.44913	0.956829	35.06	1.98384	0.945188
35.08	3.52408	1.19055	35.08	2.04269	0.869964
35.1	3.61602	1.31826	35.1	2.03423	0.969317
35.12	3.58244	1.05414	35.12	2.24004	0.959013
35.14	3.61066	0.993544	35.14	2.24388	0.950826
35.16	3.72982	1.18388	35.16	2.09304	0.91731
35.18	3.50644	0.835684	35.18	2.06372	0.937818
35.2	3.4053	0.918317	35.2	2.01469	0.906715
35.22	3.3893	1.15494	35.22	2.07988	0.866548
35.24	3.4594	0.88199	35.24	2.04354	0.93411
35.26	3.41169	1.07545	35.26	2.11172	0.868861
35.28	3.44097	1.16472	35.28	2.05645	0.89369
35.3	3.15311	1.13726	35.3	1.96537	0.945296
35.32	3.37556	1.13813	35.32	2.10984	0.965886
35.34	3.50344	1.10844	35.34	2.08234	0.908086
35.36	3.59898	1.27833	35.36	2.24057	0.962658
35.38	3.46113	1.16028	35.38	2.088	0.96397
35.4	3.47316	1.24615	35.4	2.03681	0.88649
35.42	3.56521	1.16682	35.42	2.08189	0.933188
35.44	3.57101	1.0958	35.44	2.13571	1.01353
35.46	3.39173	1.15155	35.46	2.15559	0.879092
35.48	3.31781	1.1263	35.48	2.1956	0.857284
35.5	3.30175	1.15124	35.5	2.10625	0.848962
35.52	3.16908	1.14129	35.52	2.05672	0.92344
35.54	3.13057	0.904623	35.54	2.06395	0.873934
35.56	3.10146	1.02227	35.56	2.23925	0.8644
35.58	3.18765	0.969447	35.58	2.28896	0.864837
35.6	3.20806	1.21159	35.6	2.26122	0.93208
35.62	3.29874	0.997193	35.62	2.12178	0.934773
35.64	3.20705	1.01275	35.64	2.17011	0.930584
35.66	3.19277	1.14528	35.66	2.23019	0.893921
35.68	3.26641	1.06977	35.68	2.25944	0.925895
35.7	3.3433	1.16495	35.7	2.27645	0.976552
35.72	3.31265	1.16947	35.72	2.26357	0.948431
35.74	3.39757	0.876324	35.74	2.20651	0.871316
35.76	3.51594	1.1469	35.76	2.0179	0.985691
35.78	3.55213	1.18176	35.78	2.23035	0.977171
35.8	3.46563	1.31018	35.8	2.32377	0.895009
35.82	3.41603	1.30764	35.82	2.23276	0.863145
35.84	3.4441	0.963619	35.84	2.3418	0.899127
35.86	3.43207	1.13213	35.86	2.16444	0.944655
35.88	3.45296	1.26461	35.88	2.29993	0.98094
35.9	3.52157	0.932647	35.9	2.1549	1.00329
35.92	3.64912	0.993647	35.92	2.25173	0.890904
35.94	3.73358	0.99991	35.94	2.11276	0.96697
35.96	3.52883	1.00811	35.96	2.14548	0.947157
35.98	3.40086	0.921685	35.98	2.13792	0.958691
36	3.46617	0.874781	36	2.11332	0.951903
36.02	3.41873	0.907998	36.02	2.23574	0.915296
36.04	3.46128	0.894074	36.04	2.03967	0.91123
36.06	3.53772	1.01487	36.06	2.09919	0.926085
36.08	3.49897	0.900406	36.08	2.05151	0.927715
36.1	3.56415	1.11744	36.1	2.0772	0.882983
36.12	3.65634	0.952539	36.12	2.08725	0.922992
36.14	3.50445	0.920165	36.14	2.14433	0.87856
36.16	3.65066	0.924645	36.16	2.08489	0.865842
36.18	3.64326	1.03437	36.18	2.02521	0.903648
36.2	3.49469	0.890892	36.2	2.20807	0.897485
36.22	3.63716	1.09766	36.22	2.20898	0.900471
36.24	3.4989	1.08422	36.24	2.08862	0.898322
36.26	3.56691	1.34073	36.26	2.13757	0.896507
36.28	3.54308	1.20754	36.28	2.17267	0.989525
36.3	3.52018	1.05806	36.3	1.95144	0.885359
36.32	3.38575	1.09107	36.32	1.99162	0.88498
36.34	3.52827	1.3689	36.34	2.02098	0.945779
36.36	3.48691	1.03007	36.36	1.94707	0.842876
36.38	3.60361	1.1941	36.38	2.13869	0.927736
36.4	3.61615	0.9559	36.4	1.97652	0.922442
36.42	3.48232	0.867518	36.42	1.97088	0.884282
36.44	3.55881	1.04051	36.44	1.9488	0.970406
36.46	3.70911	0.812948	36.46	1.7949	0.890198
36.48	3.4619	1.15155	36.48	1.98068	0.896235
36.5	3.47192	1.04399	36.5	2.00475	0.917125
36.52	3.59535	0.917989	36.52	2.09757	0.927057
36.54	3.72577	0.849794	36.54	1.96617	0.873391
36.56	3.57793	0.788352	36.56	2.00687	0.894384
36.58	3.58903	0.719292	36.58	1.9293	0.907609
36.6	3.56116	0.892896	36.6	1.99502	0.899606
36.62	3.71645	1.03656	36.62	2.00933	0.895751
36.64	3.53737	0.774894	36.64	2.08347	0.973032
36.66	3.61055	0.83683	36.66	2.25733	0.872167
36.68	3.5743	0.887444	36.68	2.06727	0.901958
36.7	3.62826	0.982251	36.7	2.09714	0.924636
36.72	3.6806	1.01673	36.72	2.1161	0.88013
36.74	3.8153	0.933764	36.74	2.24997	0.952065
36.76	3.69847	1.06582	36.76	2.10547	0.906264
36.78	3.70866	0.834963	36.78	2.00271	0.95982
36.8	3.67408	1.08956	36.8	2.05953	0.928836
36.82	3.62707	1.09038	36.82	1.90594	0.937624
36.84	3.70942	1.12438	36.84	1.94812	0.928712
36.86	3.64522	0.952516	36.86	1.95493	0.971688
36.88	3.65651	1.05025	36.88	1.97195	0.781567
36.9	3.53972	1.27383	36.9	2.00003	0.947491
36.92	3.55602	1.20443	36.92	1.92727	0.89107
36.94	3.69911	1.20899	36.94	2.13355	0.886622
36.96	3.66624	1.07554	36.96	1.98395	0.905208
36.98	3.54801	0.766554	36.98	2.06225	0.901763
37	3.44178	1.13783	37	1.97509	0.941461
37.02	3.58925	1.12824	37.02	2.21191	0.956133
37.04	3.45907	0.967415	37.04	2.10635	0.867315
37.06	3.45268	1.04181	37.06	2.00682	0.936145
37.08	3.38389	0.788104	37.08	2.12897	0.976637
37.1	3.2723	0.856064	37.1	2.04143	0.978254
37.12	3.3544	1.22045	37.12	2.11893	0.865077
37.14	3.42141	1.12984	37.14	2.0906	0.935875
37.16	3.21888	1.16863	37.16	2.12537	0.879314
37.18	3.27718	1.06932	37.18	2.15769	1.0261
37.2	3.30821	1.12842	37.2	2.2394	0.940482
37.22	3.40618	1.10028	37.22	2.15725	0.926941
37.24	3.4195	0.969681	37.24	2.11245	0.942683
37.26	3.49641	0.976572	37.26	2.12262	0.974954
37.28	3.45373	1.01349	37.28	2.25788	0.88423
37.3	3.44186	1.27715	37.3	2.04485	0.949897
37.32	3.25897	1.26041	37.32	2.12486	0.985322
37.34	3.4574	1.1293	37.34	2.16857	0.920829
37.36	3.38869	1.16221	37.36	2.11284	0.910373
37.38	3.3639	1.19707	37.38	2.16374	0.900642
37.4	3.28909	1.16675	37.4	2.21762	0.925491
37.42	3.21469	0.88394	37.42	2.23962	0.902482
37.44	3.1821	1.05373	37.44	2.18145	0.922065
37.46	3.18654	0.960256	37.46	2.24784	0.929838
37.48	3.20139	0.995389	37.48	2.1577	0.895674
37.5	3.14057	0.70595	37.5	2.14568	0.943287
37.52	2.97751	1.15313	37.52	2.1167	0.926104
37.54	3.01886	0.828944	37.54	2.18261	0.942974
37.56	2.90582	1.19053	37.56	2.23567	0.784476
37.58	2.8832	0.749121	37.58	2.1042	0.908546
37.6	2.97872	0.990683	37.6	2.15961	0.938686
37.62	3.21307	1.1212	37.62	2.12423	0.884244
37.64	3.26531	0.625757	37.64	2.07661	0.942173
37.66	3.24573	0.758009	37.66	2.26671	0.938538
37.68	3.26535	1.0161	37.68	2.3535	0.918128
37.7	3.30156	0.943747	37.7	2.02751	0.697325
37.72	3.37358	0.936977	37.72	2.09599	0.986467
37.74	3.26229	0.943093	37.74	2.22339	0.943016
37.76	3.36855	0.940356	37.76	2.12445	0.907429
37.78	3.43235	1.09595	37.78	2.23935	0.949789
37.8	3.35595	0.989985	37.8	2.20881	0.895072
37.82	3.35765	0.861101	37.82	2.17764	0.845315
37.84	3.26631	0.783377	37.84	2.14686	0.896649
37.86	3.19559	0.917651	37.86	2.04814	0.876165
37.88	3.26176	0.932714	37.88	2.09831	0.887296
37.9	3.20198	0.972066	37.9	2.19053	0.939463
37.92	3.45507	0.909916	37.92	2.27915	0.894846
37.94	3.44611	0.9474	37.94	2.34442	0.952912
37.96	3.42624	0.817301	37.96	2.1919	0.887138
37.98	3.3897	0.882631	37.98	2.23671	0.943217
38	3.20889	0.848788	38	2.22489	0.920497
38.02	3.32099	0.67747	38.02	2.1605	0.912721
38.04	3.39978	1.09976	38.04	2.23783	0.87271
38.06	3.38572	1.05809	38.06	2.10636	1.01103
38.08	3.22809	0.957526	38.08	2.08588	0.913802
38.1	3.27236	1.20746	38.1	2.13292	0.95952
38.12	3.29335	1.06049	38.12	2.08564	0.917119
38.14	3.30108	1.12568	38.14	2.04377	0.956722
38.16	3.35048	0.894945	38.16	2.09814	0.959411
38.18	3.26023	0.960681	38.18	2.02751	0.959602
38.2	3.20672	1.1245	38.2	2.15511	0.978237
38.22	3.12435	0.775905	38.22	2.07568	0.959464
38.24	3.28859	1.01467	38.24	2.05461	0.965947
38.26	3.28952	1.0801	38.26	2.12268	0.895465
38.28	3.35278	0.930972	38.28	2.18571	0.887358
38.3	3.38598	1.18843	38.3	2.31993	0.940074
38.32	3.4	1.09248	38.32	2.11445	0.839995
38.34	3.30216	0.843011	38.34	2.32034	0.924496
38.36	3.36365	0.737689	38.36	2.17811	0.913568
38.38	3.47304	1.02283	38.38	2.135	0.94816
38.4	3.27686	0.969896	38.4	2.12739	0.965067
38.42	3.28237	1.0926	38.42	2.10117	0.872099
38.44	3.47756	1.23994	38.44	2.07656	0.95983
38.46	3.37511	1.23452	38.46	2.03395	0.904319
38.48	3.4741	1.10976	38.48	1.95279	0.925694
38.5	3.50232	0.886839	38.5	1.95617	0.894402
38.52	3.46154	1.24546	38.52	1.90244	0.929093
38.54	3.58367	0.851614	38.54	1.95358	0.938642
38.56	3.59685	0.859037	38.56	1.8894	0.917595
38.58	3.8558	1.26656	38.58	2.01522	0.962896
38.6	3.70268	1.14254	38.6	2.12061	0.925618
38.62	3.67072	0.990676	38.62	2.20271	0.917553
38.64	3.70037	1.12317	38.64	2.1577	0.924546
38.66	3.83462	1.08267	38.66	2.02581	0.892378
38.68	3.77596	1.13732	38.68	2.14481	0.9457
38.7	3.69676	1.10596	38.7	2.1611	0.936603
38.72	3.71554	1.08906	38.72	2.1515	0.856714
38.74	3.65054	0.980197	38.74	2.03869	0.952761
38.76	3.76556	0.910854	38.76	2.14384	0.927788
38.78	3.68282	0.853323	38.78	2.05905	0.989086
38.8	3.97209	0.780707	38.8	2.14905	0.913471
38.82	3.872	0.792139	38.82	2.07782	0.89303
38.84	3.77614	0.919874	38.84	2.07544	1.00115
38.86	3.97585	0.663931	38.86	2.17963	0.891099
38.88	3.85852	1.2123	38.88	2.10186	0.696646
38.9	3.83799	0.902265	38.9	2.07078	0.877165
38.92	3.78733	1.05481	38.92	2.02269	0.921914
38.94	4.15555	0.845271	38.94	2.02744	0.815314
38.96	3.82117	0.748055	38.96	2.09447	0.894437
38.98	3.92723	1.26608	38.98	2.24401	0.897981
39	3.78813	1.09006	39	2.13416	0.963245
39.02	3.74714	1.26546	39.02	2.14079	0.906076
39.04	3.7373	0.960916	39.04	2.12576	0.98345
39.06	3.67638	0.645547	39.06	2.13184	0.955706
39.08	3.78771	1.12842	39.08	2.10973	0.831705
39.1	3.82121	1.15188	39.1	2.12598	0.940605
39.12	3.94037	1.06607	39.12	1.96154	0.789853
39.14	3.88909	0.937349	39.14	1.97445	0.859657
39.16	3.76968	0.848306	39.16	2.16939	0.973939
39.18	3.8835	0.971267	39.18	2.11896	0.916256
39.2	3.86248	0.877155	39.2	2.35895	0.819839
39.22	3.8382	0.704472	39.22	2.21397	0.847525
39.24	3.83822	0.794694	39.24	2.07365	0.842304
39.26	3.83477	0.842173	39.26	2.09752	0.907282
39.28	3.85033	0.761296	39.28	2.20215	0.881262
39.3	3.76393	0.950345	39.3	2.26227	0.919564
39.32	3.77453	0.997402	39.32	2.19806	0.862988
39.34	3.6488	0.997244	39.34	2.20932	0.767761
39.36	3.72842	0.987965	39.36	2.29939	0.875802
39.38	3.84034	1.07938	39.38	2.26513	0.790341
39.4	3.76885	1.1952	39.4	2.16661	0.887125
39.42	3.72798	1.2177	39.42	2.21619	0.855037
39.44	3.72741	1.10799	39.44	2.20887	0.896559
39.46	3.69828	1.01719	39.46	2.17081	0.897105
39.48	3.61968	0.895713	39.48	2.02438	0.893245
39.5	3.62109	1.14645	39.5	2.20741	0.927613
39.52	3.68655	1.10177	39.52	2.14628	0.917958
39.54	3.91037	1.08699	39.54	2.11657	0.881096
39.56	3.92537	0.763148	39.56	2.12107	0.718291
39.58	3.93112	0.875187	39.58	2.15274	0.576561
39.6	4.17773	0.888203	39.6	2.13148	0.914279
39.62	4.10548	1.19992	39.62	2.13078	0.889286
39.64	4.23473	1.19843	39.64	2.14991	0.918836
39.66	4.23272	1.13713	39.66	2.16385	0.985235
39.68	4.31567	1.05734	39.68	2.12745	0.911778
39.7	4.31577	1.05616	39.7	2.15977	0.699114
39.72	4.23696	0.778677	39.72	2.1961	0.576475
39.74	4.03773	0.926048	39.74	2.10651	0.787887
39.76	4.11558	0.718338	39.76	2.149	0.687674
39.78	4.00349	0.701257	39.78	2.15711	0.607195
39.8	3.88361	0.924942	39.8	2.02088	0.552945
39.82	3.99274	0.695473	39.82	2.09521	0.899501
39.84	3.86304	0.817607	39.84	2.28561	0.768004
39.86	3.89555	1.13047	39.86	2.05186	0.48615
39.88	3.72984	0.859955	39.88	2.15944	0.907753
39.9	3.83894	1.16513	39.9	2.01767	0.687234
39.92	3.90454	1.24192	39.92	2.1333	0.530273
39.94	3.87566	1.1202	39.94	2.06753	0.560989
39.96	3.76273	1.13841	39.96	2.07919	0.788985
39.98	3.93149	1.18745	39.98	2.2229	0.894114
[truncated: 502 more rows]

## Sheet: Isavuconazole
Time (ns)	protein_ARG1	LIG_Isavuconazole	Time (ns)	protein_ARG2	LIG_Isavuconazole
0.02	0.800479	0.607431	0.02	0.642135	0.400289
0.04	0.805885	0.721979	0.04	0.79593	0.899388
0.06	0.962556	0.711505	0.06	0.791687	1.28347
0.08	0.90439	0.483755	0.08	0.791779	1.42844
0.1	0.977003	0.583524	0.1	0.797429	0.921581
0.12	1.05634	0.423437	0.12	0.902964	1.57513
0.14	1.04625	0.50493	0.14	0.8526	1.64352
0.16	1.05638	0.763354	0.16	0.927447	1.42475
0.18	1.12356	0.601548	0.18	0.928103	1.46291
0.2	1.26054	0.322058	0.2	0.847669	1.58972
0.22	1.28376	0.290077	0.22	0.838091	1.41659
0.24	1.30149	0.639412	0.24	0.937082	1.30667
0.26	1.30399	0.932143	0.26	1.04123	1.36814
0.28	1.36249	0.800015	0.28	0.972277	1.32417
0.3	1.24469	1.10532	0.3	0.980539	1.49286
0.32	1.18256	1.14199	0.32	1.04101	1.32101
0.34	1.2031	0.935171	0.34	0.99839	1.51467
0.36	1.06408	0.889312	0.36	1.08241	1.38811
0.38	1.18921	1.2879	0.38	1.01176	1.33839
0.4	1.23992	0.981425	0.4	0.982465	1.12898
0.42	1.15855	1.02544	0.42	1.03638	1.40665
0.44	1.23284	1.18844	0.44	0.995625	1.27952
0.46	1.26479	1.27415	0.46	1.08122	1.33639
0.48	1.30366	1.40077	0.48	1.08302	1.14554
0.5	1.18557	1.30773	0.5	1.03	1.30035
0.52	1.16217	1.1947	0.52	1.03369	1.19397
0.54	1.19991	1.37701	0.54	1.05312	1.20106
0.56	1.38251	1.2008	0.56	1.05452	1.25004
0.58	1.41864	1.40884	0.58	1.10277	1.3363
0.6	1.39467	1.13347	0.6	1.13289	1.1618
0.62	1.41725	1.34537	0.62	1.08796	1.44442
0.64	1.46684	1.34766	0.64	1.10149	1.27048
0.66	1.53959	1.32677	0.66	1.1519	1.46688
0.68	1.58011	1.45648	0.68	1.17316	1.24738
0.7	1.56236	1.46225	0.7	1.14255	1.32163
0.72	1.45122	1.56923	0.72	1.0758	1.41396
0.74	1.5936	1.46676	0.74	1.07474	1.34665
0.76	1.80409	1.35888	0.76	1.15411	1.32056
0.78	1.78411	1.27198	0.78	1.12417	1.33584
0.8	1.65969	1.54451	0.8	1.07732	1.28711
0.82	1.72429	1.30998	0.82	1.13174	1.14835
0.84	1.78773	1.34711	0.84	1.1423	1.25692
0.86	1.85941	1.43216	0.86	1.13101	1.32641
0.88	1.86825	1.15421	0.88	1.1252	1.21789
0.9	1.8882	1.31786	0.9	1.16968	1.42834
0.92	1.73578	1.59197	0.92	1.16793	1.15502
0.94	2.0012	1.67617	0.94	1.13822	1.30623
0.96	1.83923	1.5711	0.96	1.11426	1.5407
0.98	1.81987	1.75831	0.98	1.16474	1.52224
1	1.884	1.66508	1	1.20461	1.21618
1.02	1.84852	1.43852	1.02	1.18109	1.12957
1.04	1.72536	1.79438	1.04	1.2622	1.20785
1.06	1.69951	1.63267	1.06	1.26197	1.27507
1.08	1.699	1.67276	1.08	1.18193	1.2535
1.1	1.61404	1.65196	1.1	1.19266	1.42816
1.12	1.65563	1.49769	1.12	1.05543	1.43867
1.14	1.47606	1.21786	1.14	1.10668	1.49446
1.16	1.37304	1.2848	1.16	1.16737	1.4606
1.18	1.38591	1.59111	1.18	1.18507	1.2735
1.2	1.45371	1.45255	1.2	1.22748	1.34002
1.22	1.44421	1.63292	1.22	1.28764	1.08336
1.24	1.37773	1.08882	1.24	1.18311	1.19204
1.26	1.58616	1.47843	1.26	1.11151	1.21302
1.28	1.44467	1.40038	1.28	1.14118	1.38741
1.3	1.52197	1.06696	1.3	1.16564	1.30134
1.32	1.43855	1.35764	1.32	1.22541	1.20167
1.34	1.70451	1.26337	1.34	1.174	1.3568
1.36	1.97099	1.24065	1.36	1.16743	1.40065
1.38	1.99793	1.34408	1.38	1.16221	1.49384
1.4	1.96422	1.36922	1.4	1.26694	1.4671
1.42	2.05219	1.28262	1.42	1.20062	1.41778
1.44	1.99231	1.30215	1.44	1.08377	1.3895
1.46	1.93028	1.2595	1.46	1.24176	1.47306
1.48	1.95409	1.53953	1.48	1.18234	1.11613
1.5	1.92957	1.30472	1.5	1.19992	1.04972
1.52	1.9449	1.32625	1.52	1.16936	1.06944
1.54	1.75285	1.54822	1.54	1.18769	1.23252
1.56	1.73309	1.46207	1.56	1.16698	1.28079
1.58	1.80175	1.50548	1.58	1.1543	1.53778
1.6	1.75598	1.39208	1.6	1.17923	1.41159
1.62	1.62966	1.47088	1.62	1.11076	1.46935
1.64	1.66664	1.4483	1.64	1.13064	1.36095
1.66	1.68682	1.5396	1.66	1.09157	1.38372
1.68	1.64295	1.5494	1.68	1.07084	1.41867
1.7	1.57838	1.56013	1.7	1.06587	1.0294
1.72	1.49674	1.75426	1.72	1.10762	1.17237
1.74	1.53011	1.82858	1.74	1.15887	1.1336
1.76	1.53019	1.39272	1.76	1.16757	1.16718
1.78	1.68922	1.2385	1.78	1.18868	1.42772
1.8	1.52253	1.70138	1.8	1.19125	1.40202
1.82	1.50212	1.44942	1.82	1.24117	1.42089
1.84	1.52094	1.5169	1.84	1.20178	1.25118
1.86	1.56851	1.55693	1.86	1.24225	1.36201
1.88	1.77232	1.72691	1.88	1.29498	1.36778
1.9	1.79784	1.83103	1.9	1.21591	1.74314
1.92	1.80852	1.81346	1.92	1.25347	1.27784
1.94	1.87357	2.00886	1.94	1.27493	1.39205
1.96	1.73781	1.99212	1.96	1.33846	1.17399
1.98	1.69621	2.26079	1.98	1.28392	1.31971
2	1.61634	2.05354	2	1.31727	1.35334
2.02	1.71885	1.83722	2.02	1.22558	1.2155
2.04	1.73809	1.60449	2.04	1.32122	1.54792
2.06	1.73611	1.73978	2.06	1.19	1.39131
2.08	1.69785	1.77053	2.08	1.328	1.32615
2.1	1.64259	1.82041	2.1	1.28176	1.45257
2.12	1.61362	2.03632	2.12	1.30335	1.47532
2.14	1.67571	1.98814	2.14	1.28069	1.59506
2.16	1.65904	1.89595	2.16	1.20344	1.22798
2.18	1.77228	2.07525	2.18	1.23566	1.00324
2.2	1.95366	1.87568	2.2	1.17628	1.41452
2.22	2.05368	2.14347	2.22	1.23166	1.12936
2.24	2.08208	2.06789	2.24	1.14579	1.17979
2.26	2.00414	2.00758	2.26	1.26835	1.33636
2.28	1.94641	2.32066	2.28	1.16758	1.10325
2.3	1.85954	2.02988	2.3	1.21299	1.23757
2.32	2.05529	2.22753	2.32	1.22019	1.26725
2.34	1.9258	2.71623	2.34	1.26593	1.23311
2.36	2.05741	2.40968	2.36	1.26317	1.26671
2.38	1.91714	2.35482	2.38	1.34999	1.34255
2.4	1.73268	2.06544	2.4	1.37421	1.34123
2.42	2.00382	2.26129	2.42	1.22672	1.44547
2.44	2.03609	2.24597	2.44	1.31259	1.87329
2.46	2.05015	1.98598	2.46	1.23059	1.87092
2.48	2.00982	2.13208	2.48	1.25895	1.91584
2.5	1.85619	1.904	2.5	1.20886	1.96046
2.52	1.79345	2.08868	2.52	1.21539	1.94725
2.54	1.84827	2.02249	2.54	1.1962	1.94254
2.56	2.13781	2.23705	2.56	1.22698	1.83569
2.58	1.97087	2.4959	2.58	1.32126	1.79846
2.6	2.18078	1.94083	2.6	1.30102	1.56183
2.62	2.23613	1.99131	2.62	1.24893	1.80196
2.64	2.25759	1.80294	2.64	1.36932	1.91493
2.66	2.44297	2.47839	2.66	1.24889	1.94142
2.68	2.31349	2.09645	2.68	1.25204	1.93077
2.7	2.24425	2.28352	2.7	1.25348	1.88724
2.72	2.29351	2.5251	2.72	1.1669	1.9061
2.74	2.13516	2.48717	2.74	1.22783	1.7996
2.76	2.22708	2.48037	2.76	1.29699	1.91157
2.78	2.07521	2.31204	2.78	1.29316	1.90259
2.8	1.87738	2.38648	2.8	1.29603	1.8575
2.82	2.08878	2.50102	2.82	1.3816	1.86429
2.84	1.96931	2.32187	2.84	1.33394	1.96575
2.86	2.03626	2.49792	2.86	1.28324	1.87558
2.88	1.98905	2.35377	2.88	1.30006	1.80947
2.9	2.17277	2.37173	2.9	1.30504	1.91984
2.92	2.35412	2.44917	2.92	1.39158	1.88132
2.94	2.31371	2.46882	2.94	1.35298	1.75247
2.96	2.33434	2.26052	2.96	1.36575	1.76297
2.98	2.24501	2.3574	2.98	1.43476	1.89817
3	2.31955	2.2204	3	1.37542	1.87653
3.02	2.296	1.92749	3.02	1.41296	1.87712
3.04	2.31036	2.34697	3.04	1.34395	1.81636
3.06	2.32554	2.40322	3.06	1.40703	1.84986
3.08	2.44865	2.25928	3.08	1.37377	1.79183
3.1	2.25849	2.24125	3.1	1.34441	1.81648
3.12	2.36793	2.41333	3.12	1.32377	1.68805
3.14	2.34369	2.30523	3.14	1.37939	1.74378
3.16	2.31885	2.388	3.16	1.38134	1.66494
3.18	2.32732	2.59919	3.18	1.40179	1.59556
3.2	2.43295	2.26274	3.2	1.38265	1.79202
3.22	2.28062	2.26311	3.22	1.3478	1.68265
3.24	2.06121	2.2648	3.24	1.4297	1.6734
3.26	1.8879	2.13196	3.26	1.30301	1.63612
3.28	1.98782	2.31283	3.28	1.41134	1.58554
3.3	1.94596	2.25707	3.3	1.35927	1.8813
3.32	1.9839	2.32718	3.32	1.32707	1.59547
3.34	2.00125	2.2637	3.34	1.35305	1.49194
3.36	2.01414	2.30981	3.36	1.3391	1.63564
3.38	1.79226	2.21996	3.38	1.44317	1.32195
3.4	1.88713	2.24436	3.4	1.40061	1.61265
3.42	1.71091	2.3111	3.42	1.44412	1.57163
3.44	1.7368	2.10842	3.44	1.4739	1.61417
3.46	1.74054	1.92912	3.46	1.51028	1.26755
3.48	1.85165	2.30715	3.48	1.47646	1.46167
3.5	1.91726	1.95894	3.5	1.54337	1.47026
3.52	1.80342	2.1352	3.52	1.47627	1.61861
3.54	1.70124	1.80331	3.54	1.46655	1.79786
3.56	1.90849	2.08658	3.56	1.49091	1.31496
3.58	1.83555	2.13339	3.58	1.52696	1.41262
3.6	1.72609	2.34886	3.6	1.57658	1.27216
3.62	1.80217	2.09334	3.62	1.47414	1.65633
3.64	1.85125	2.49437	3.64	1.64526	1.24692
3.66	1.82272	2.33982	3.66	1.34378	1.36771
3.68	1.89566	2.3041	3.68	1.30641	1.27046
3.7	1.83365	2.2679	3.7	1.3092	1.22628
3.72	1.76786	2.2013	3.72	1.30224	1.32635
3.74	1.63067	2.23993	3.74	1.39164	1.34608
3.76	1.63638	1.88627	3.76	1.30806	1.24249
3.78	1.65279	2.23645	3.78	1.37267	1.3351
3.8	1.65974	2.14382	3.8	1.36921	1.32824
3.82	1.81398	2.47568	3.82	1.34325	1.43644
3.84	1.782	2.46554	3.84	1.28403	1.60524
3.86	1.79119	2.41987	3.86	1.39991	1.40885
3.88	1.83379	2.30419	3.88	1.37827	1.85977
3.9	1.71249	2.42503	3.9	1.31886	1.83081
3.92	1.74678	2.40746	3.92	1.29884	1.64009
3.94	1.71571	2.5046	3.94	1.34912	1.74368
3.96	1.76681	2.26883	3.96	1.45689	1.5539
3.98	1.76233	2.29263	3.98	1.25461	1.83519
4	1.74053	2.58509	4	1.28194	1.82001
4.02	1.86188	2.38208	4.02	1.34645	1.7979
4.04	1.80871	2.40933	4.04	1.28149	1.82408
4.06	1.76341	2.72574	4.06	1.31876	1.81201
4.08	1.81755	2.28986	4.08	1.3407	1.91414
4.1	2.02296	2.42992	4.1	1.31571	1.85231
4.12	1.88701	2.54486	4.12	1.28804	1.79491
4.14	1.90367	2.19455	4.14	1.26862	1.86448
4.16	1.84276	2.59819	4.16	1.30949	1.6006
4.18	1.84937	2.62809	4.18	1.3501	1.68061
4.2	1.82174	2.48003	4.2	1.37772	1.26805
4.22	1.78885	2.40481	4.22	1.3701	1.37821
4.24	1.90378	2.53934	4.24	1.34238	1.69657
4.26	1.91981	2.45996	4.26	1.41237	1.64476
4.28	2.13605	2.04805	4.28	1.32618	1.69486
4.3	2.0104	2.2171	4.3	1.36437	1.57566
4.32	2.03115	2.20814	4.32	1.3459	1.49207
4.34	2.23634	2.36936	4.34	1.31849	1.54573
4.36	2.24615	2.16344	4.36	1.39676	1.90322
4.38	2.23214	2.26509	4.38	1.34476	1.82418
4.4	2.21229	2.28154	4.4	1.27602	1.80988
4.42	2.23457	2.24796	4.42	1.29816	1.87097
4.44	2.30547	2.28713	4.44	1.34908	1.72841
4.46	2.28636	2.43678	4.46	1.33111	1.56328
4.48	2.18442	2.27278	4.48	1.427	1.72377
4.5	2.30775	2.30431	4.5	1.31024	1.82815
4.52	2.37039	2.27623	4.52	1.36973	1.6151
4.54	2.38228	2.18181	4.54	1.35433	1.84931
4.56	2.56117	2.42953	4.56	1.3079	1.84085
4.58	2.41249	2.27439	4.58	1.45801	1.82322
4.6	2.24426	2.22806	4.6	1.34129	1.87389
4.62	2.25742	2.26549	4.62	1.33376	1.8153
4.64	2.35617	2.45709	4.64	1.38118	1.82505
4.66	2.37863	2.47424	4.66	1.41197	1.70868
4.68	2.36991	2.28917	4.68	1.38338	1.75365
4.7	2.33455	2.11719	4.7	1.39297	1.78452
4.72	2.29913	2.2805	4.72	1.4142	1.83184
4.74	2.32678	2.09237	4.74	1.35315	1.73912
4.76	2.42321	2.26847	4.76	1.34793	1.22151
4.78	2.43119	2.51523	4.78	1.31895	1.76149
4.8	2.43672	2.39225	4.8	1.28618	1.72123
4.82	2.18546	2.51684	4.82	1.35149	1.8097
4.84	2.30005	2.2785	4.84	1.36111	1.76586
4.86	2.46585	2.6237	4.86	1.30017	1.72725
4.88	2.27206	2.17325	4.88	1.31159	1.54709
4.9	2.19971	2.33728	4.9	1.34408	1.85342
4.92	2.40451	2.51882	4.92	1.39843	1.79049
4.94	2.43077	2.1085	4.94	1.44001	1.76072
4.96	2.27392	2.42702	4.96	1.41732	1.66191
4.98	2.33182	2.4924	4.98	1.4276	1.86466
5	2.23022	2.64637	5	1.47395	1.67382
5.02	2.29568	2.531	5.02	1.35662	1.81427
5.04	2.20787	2.50815	5.04	1.33541	1.82986
5.06	2.36189	2.53464	5.06	1.33886	1.73584
5.08	2.47921	2.29167	5.08	1.48644	1.66647
5.1	2.57783	2.39227	5.1	1.49583	1.58585
5.12	2.53357	2.50129	5.12	1.50208	1.68495
5.14	2.37874	2.40221	5.14	1.47923	1.77713
5.16	2.37921	2.57811	5.16	1.41003	1.52173
5.18	2.44559	2.33955	5.18	1.52584	1.58896
5.2	2.38878	2.48572	5.2	1.5511	1.66621
5.22	2.36053	2.41627	5.22	1.42454	1.79044
5.24	2.12647	2.37582	5.24	1.43971	1.5848
5.26	2.06399	2.06249	5.26	1.42842	1.76261
5.28	2.0062	2.10579	5.28	1.47724	1.74979
5.3	2.05056	2.06946	5.3	1.37909	1.88512
5.32	2.00607	2.37814	5.32	1.34547	1.71617
5.34	2.06339	2.24453	5.34	1.30271	1.60276
5.36	2.08198	2.41196	5.36	1.37271	1.7738
5.38	2.1443	2.42713	5.38	1.2812	1.74147
5.4	2.18119	2.21808	5.4	1.36672	1.63396
5.42	2.1176	2.23773	5.42	1.34921	1.65077
5.44	2.07589	2.12327	5.44	1.26917	1.70438
5.46	2.04941	2.20657	5.46	1.24557	1.71166
5.48	2.06095	2.3659	5.48	1.17693	1.75029
5.5	2.10634	2.31074	5.5	1.33682	1.54986
5.52	2.1973	2.22252	5.52	1.37363	1.78853
5.54	2.236	2.20114	5.54	1.31564	1.73288
5.56	2.1647	2.18518	5.56	1.35413	1.67419
5.58	2.12874	2.11365	5.58	1.41036	1.5163
5.6	2.09171	2.28015	5.6	1.31687	1.7555
5.62	2.16015	2.33702	5.62	1.31664	1.73879
5.64	2.19859	2.17145	5.64	1.44028	1.47128
5.66	2.23176	2.04326	5.66	1.27489	1.62101
5.68	2.23511	2.08798	5.68	1.28828	1.68931
5.7	2.34633	2.2337	5.7	1.3693	1.69511
5.72	2.46577	2.33694	5.72	1.39064	1.6061
5.74	2.36165	2.31833	5.74	1.40754	1.70071
5.76	2.50835	2.03084	5.76	1.48373	1.75549
5.78	2.49094	2.05833	5.78	1.39765	1.68281
5.8	2.81034	2.16523	5.8	1.45501	1.62199
5.82	2.73918	2.27258	5.82	1.46355	1.60563
5.84	2.51079	2.34192	5.84	1.36056	1.65197
5.86	2.57266	2.07888	5.86	1.46498	1.85597
5.88	2.72222	2.1554	5.88	1.43926	1.74897
5.9	2.54715	2.39156	5.9	1.51136	1.74623
5.92	2.53171	2.24426	5.92	1.49239	1.74341
5.94	2.61998	2.19405	5.94	1.46181	1.60026
5.96	2.65631	2.32192	5.96	1.44875	1.74629
5.98	2.46986	2.37303	5.98	1.50078	1.51628
6	2.79061	2.31279	6	1.4611	1.62327
6.02	2.52783	2.20794	6.02	1.37954	1.60072
6.04	2.66805	2.31783	6.04	1.37601	1.35649
6.06	2.85483	2.34065	6.06	1.31714	1.44303
6.08	2.80018	2.3515	6.08	1.49192	1.47665
6.1	2.7146	2.16211	6.1	1.39352	1.12433
6.12	2.88929	2.34348	6.12	1.42042	1.15426
6.14	2.85138	2.30695	6.14	1.35595	1.21574
6.16	2.8636	2.15706	6.16	1.42427	1.26916
6.18	2.82356	2.30938	6.18	1.40463	1.23606
6.2	2.82509	2.45831	6.2	1.42474	1.23704
6.22	2.97851	2.37265	6.22	1.50896	1.42567
6.24	2.88505	2.22528	6.24	1.53918	1.61569
6.26	2.99508	2.07304	6.26	1.589	1.50538
6.28	2.88017	2.28805	6.28	1.43202	1.67531
6.3	2.85425	2.37417	6.3	1.54775	1.62014
6.32	3.00736	2.15259	6.32	1.60193	1.48292
6.34	2.80318	2.16595	6.34	1.45414	1.53222
6.36	2.92751	2.20615	6.36	1.60143	1.42132
6.38	3.1414	2.30327	6.38	1.50324	1.38668
6.4	2.8486	2.36321	6.4	1.60133	1.37193
6.42	3.03944	2.32813	6.42	1.52089	1.5064
6.44	2.89886	2.12928	6.44	1.47707	1.56399
6.46	2.97391	2.23484	6.46	1.58409	1.47416
6.48	2.80279	2.49039	6.48	1.40806	1.55456
6.5	2.74002	2.41751	6.5	1.49229	1.61538
6.52	2.71955	2.31397	6.52	1.49686	1.45663
6.54	2.62241	2.37619	6.54	1.50479	1.27784
6.56	2.73059	2.57007	6.56	1.55963	1.17585
6.58	2.9054	2.3283	6.58	1.51228	1.45259
6.6	3.05258	2.26839	6.6	1.50159	1.16482
6.62	2.83034	2.43059	6.62	1.52933	1.85319
6.64	2.92211	2.44327	6.64	1.60032	1.76712
6.66	2.86989	2.27257	6.66	1.58916	1.84193
6.68	3.0172	2.36258	6.68	1.60103	1.8645
6.7	3.05151	2.26149	6.7	1.60879	1.89751
6.72	2.98776	2.22633	6.72	1.54266	1.89768
6.74	2.77078	2.0089	6.74	1.51104	1.88087
6.76	2.73699	2.46025	6.76	1.50637	1.87186
6.78	2.9229	2.18328	6.78	1.52837	1.9047
6.8	2.84065	2.21396	6.8	1.55967	1.81033
6.82	2.99386	1.98236	6.82	1.44132	1.83826
6.84	2.88041	2.07618	6.84	1.59839	1.79313
6.86	2.8867	2.47649	6.86	1.48722	1.83965
6.88	2.79484	2.34482	6.88	1.51816	1.84485
6.9	2.87757	2.09826	6.9	1.48609	1.85028
6.92	2.71243	2.4363	6.92	1.52035	1.92705
6.94	2.8045	2.24563	6.94	1.50155	1.85991
6.96	2.64076	2.45262	6.96	1.46516	1.75146
6.98	2.76058	2.53882	6.98	1.55242	1.84345
7	2.67411	2.15295	7	1.46164	1.69785
7.02	2.73355	2.23157	7.02	1.61344	1.20491
7.04	2.60239	2.55852	7.04	1.61535	1.17525
7.06	2.59174	2.51975	7.06	1.59933	1.18928
7.08	2.7196	2.42495	7.08	1.57389	1.09402
7.1	2.7573	2.36915	7.1	1.72773	1.18913
7.12	2.69931	2.2411	7.12	1.53893	1.20405
7.14	2.47937	2.33177	7.14	1.62756	1.1728
7.16	2.42555	2.26384	7.16	1.585	1.24818
7.18	2.37649	2.36883	7.18	1.60861	1.20003
7.2	2.39486	2.18449	7.2	1.58204	1.25362
7.22	2.4086	2.13858	7.22	1.59384	1.20193
7.24	2.32156	2.29636	7.24	1.55872	1.26612
7.26	2.25718	2.33107	7.26	1.62001	1.27951
7.28	2.26946	2.11424	7.28	1.54529	1.23804
7.3	2.4506	2.05603	7.3	1.61764	1.0987
7.32	2.69691	1.98827	7.32	1.48286	1.18857
7.34	2.55091	2.08056	7.34	1.52856	1.10071
7.36	2.56207	2.27452	7.36	1.48905	1.24402
7.38	2.59763	2.30027	7.38	1.50536	1.18164
7.4	2.46172	2.37281	7.4	1.4855	1.27946
7.42	2.62611	2.52956	7.42	1.51383	1.31865
7.44	2.72211	2.30578	7.44	1.52992	1.36102
7.46	2.48141	2.2207	7.46	1.55743	1.14897
7.48	2.55139	2.05314	7.48	1.62803	1.27737
7.5	2.65282	2.27421	7.5	1.64687	1.18334
7.52	2.76684	2.08826	7.52	1.46944	1.13955
7.54	2.92429	2.23888	7.54	1.52874	1.2841
7.56	2.79155	2.37924	7.56	1.50851	1.01422
7.58	2.87901	2.14149	7.58	1.46262	1.22757
7.6	2.99779	2.14674	7.6	1.43974	1.22476
7.62	3.02684	2.22085	7.62	1.4847	1.12101
7.64	2.95936	2.18508	7.64	1.52336	1.18165
7.66	2.87916	2.07717	7.66	1.54579	1.12178
7.68	2.59055	2.33936	7.68	1.56055	1.24709
7.7	2.65386	2.14179	7.7	1.57383	1.20238
7.72	2.69951	2.14987	7.72	1.6085	1.15091
7.74	2.65308	2.21726	7.74	1.71815	1.19318
7.76	2.53122	2.21985	7.76	1.63766	1.20764
7.78	2.47717	2.31324	7.78	1.5875	1.19539
7.8	2.65151	2.18841	7.8	1.63016	1.21288
7.82	2.52699	2.2385	7.82	1.59933	1.28786
7.84	2.50456	2.61511	7.84	1.51433	1.10311
7.86	2.46576	2.39754	7.86	1.51439	1.18162
7.88	2.35407	2.25978	7.88	1.54371	1.19998
7.9	2.37628	2.1811	7.9	1.50573	1.11526
7.92	2.59825	2.29815	7.92	1.60376	1.66933
7.94	2.50257	2.26274	7.94	1.62335	1.55715
7.96	2.56269	2.09792	7.96	1.5882	1.3527
7.98	2.67062	2.23505	7.98	1.56307	1.84425
8	2.65209	2.14483	8	1.62958	1.68326
8.02	2.85337	2.35551	8.02	1.5815	1.53568
8.04	2.63964	2.25307	8.04	1.66351	1.68794
8.06	2.4444	2.27665	8.06	1.56427	1.70922
8.08	2.44787	2.13382	8.08	1.64165	1.62668
8.1	2.4026	2.17788	8.1	1.62272	1.68001
8.12	2.32734	2.15132	8.12	1.61243	1.703
8.14	2.57697	2.10399	8.14	1.59933	1.77033
8.16	2.50942	2.2312	8.16	1.66015	1.69673
8.18	2.39531	2.05843	8.18	1.64123	1.71628
8.2	2.41909	2.38914	8.2	1.65958	1.86372
8.22	2.4696	2.07045	8.22	1.62958	1.67617
8.24	2.35793	1.97668	8.24	1.72571	1.43817
8.26	2.41151	2.33059	8.26	1.67372	1.21838
8.28	2.48496	2.26055	8.28	1.67431	1.39333
8.3	2.41978	2.32568	8.3	1.71306	1.61219
8.32	2.48162	2.39331	8.32	1.68701	1.37643
8.34	2.49702	2.59144	8.34	1.70805	1.57386
8.36	2.47032	2.50054	8.36	1.67872	1.84448
8.38	2.45164	2.59077	8.38	1.591	1.63095
8.4	2.51524	2.41388	8.4	1.63606	1.50337
8.42	2.73834	2.13702	8.42	1.60831	1.63812
8.44	2.57073	2.61411	8.44	1.65355	1.53108
8.46	2.48716	2.42465	8.46	1.54173	1.34965
8.48	2.26062	2.34091	8.48	1.51765	1.20761
8.5	2.39851	2.15933	8.5	1.53187	1.19881
8.52	2.61233	2.50785	8.52	1.52058	1.20562
8.54	2.5284	2.27966	8.54	1.58893	1.2468
8.56	2.54549	2.2891	8.56	1.4587	1.29024
8.58	2.57909	2.02064	8.58	1.47057	1.23838
8.6	2.56715	2.12137	8.6	1.41639	1.26519
8.62	2.59219	2.18926	8.62	1.42272	1.26516
8.64	2.6964	2.2387	8.64	1.49759	1.39995
8.66	2.58602	2.32506	8.66	1.54341	1.41265
8.68	2.86219	2.06542	8.68	1.48192	1.88179
8.7	2.69379	2.33469	8.7	1.48826	1.84968
8.72	2.62618	2.3311	8.72	1.52602	1.70898
8.74	2.53516	2.45201	8.74	1.51519	1.79013
8.76	2.67028	2.43636	8.76	1.58895	1.82304
8.78	2.65017	2.46321	8.78	1.60948	1.34836
8.8	2.64193	2.45497	8.8	1.50556	1.38046
8.82	2.55253	2.27945	8.82	1.51987	1.21725
8.84	2.69867	2.14682	8.84	1.54715	1.36791
8.86	2.56973	2.55698	8.86	1.49052	1.64433
8.88	2.52207	2.44136	8.88	1.57902	1.73906
8.9	2.65382	2.15037	8.9	1.60761	1.35851
8.92	2.63035	2.32679	8.92	1.59177	1.62511
8.94	2.3345	2.19085	8.94	1.57367	1.19963
8.96	2.50753	2.33199	8.96	1.63715	1.26923
8.98	2.59941	2.31041	8.98	1.66544	1.22859
9	2.59891	1.79407	9	1.54709	1.26277
9.02	2.52294	1.89784	9.02	1.55345	1.4039
9.04	2.60371	2.23919	9.04	1.52422	1.52049
9.06	2.50615	2.50128	9.06	1.53069	1.32812
9.08	2.62166	2.22732	9.08	1.64121	1.51279
9.1	2.61378	2.15266	9.1	1.62082	1.12674
9.12	2.93247	1.68206	9.12	1.55352	1.18513
9.14	2.9507	1.84437	9.14	1.57754	1.18317
9.16	3.03905	2.18786	9.16	1.50132	1.2241
9.18	2.97314	2.51717	9.18	1.57255	1.19851
9.2	2.90616	2.43635	9.2	1.5317	1.20464
9.22	2.77888	2.5341	9.22	1.53725	1.26707
9.24	2.69503	2.52758	9.24	1.54685	1.21989
9.26	2.69919	2.53119	9.26	1.46155	1.19585
9.28	2.66681	2.43146	9.28	1.48447	1.34215
9.3	2.66368	2.35982	9.3	1.43733	1.21521
9.32	2.59982	2.38871	9.32	1.5733	1.18859
9.34	2.68399	2.24863	9.34	1.53678	1.19157
9.36	2.69504	2.33214	9.36	1.57265	1.30826
9.38	2.7209	2.5967	9.38	1.51086	1.16343
9.4	2.90577	2.33483	9.4	1.58287	1.30012
9.42	2.97678	2.38433	9.42	1.46422	1.24312
9.44	2.9348	2.72012	9.44	1.47524	1.29381
9.46	2.86726	2.66215	9.46	1.38409	1.29687
9.48	2.8679	2.46722	9.48	1.54928	1.13262
9.5	2.77785	2.29625	9.5	1.54896	1.12792
9.52	2.81421	2.3771	9.52	1.58739	1.24501
9.54	2.76334	2.29978	9.54	1.66117	1.16365
9.56	2.76247	2.09638	9.56	1.72121	1.13118
9.58	2.67593	2.00758	9.58	1.55871	1.2243
9.6	2.67142	2.16468	9.6	1.52405	1.12466
9.62	2.43887	2.08871	9.62	1.5953	1.12378
9.64	2.49945	1.97384	9.64	1.46963	1.33416
9.66	2.59923	2.25642	9.66	1.47602	1.19884
9.68	2.58134	2.38412	9.68	1.46559	1.30355
9.7	2.44013	2.3035	9.7	1.46053	1.313
9.72	2.48277	2.3623	9.72	1.60456	1.35088
9.74	2.31776	2.44283	9.74	1.63548	1.3288
9.76	2.32903	2.31475	9.76	1.63352	1.08716
9.78	2.33717	2.1701	9.78	1.70427	1.17009
9.8	2.57653	2.42241	9.8	1.71456	1.08426
9.82	2.37335	2.19031	9.82	1.68345	1.13987
9.84	2.63617	2.03554	9.84	1.57214	1.34719
9.86	2.74547	2.29942	9.86	1.57655	1.2138
9.88	2.71418	2.32715	9.88	1.64342	1.15473
9.9	2.49119	2.17317	9.9	1.64613	1.29246
9.92	2.56362	2.29673	9.92	1.63131	1.21264
9.94	2.43342	2.12052	9.94	1.69614	1.16014
9.96	2.50211	2.16771	9.96	1.62915	1.1615
9.98	2.48077	2.34383	9.98	1.6611	1.12763
10	2.31268	2.37661	10	1.66255	1.16337
10.02	2.42641	2.32954	10.02	1.70134	1.11333
10.04	2.34215	2.13133	10.04	1.65949	1.18305
10.06	2.13121	2.42771	10.06	1.54885	1.29514
10.08	2.30114	2.19358	10.08	1.69374	1.17903
10.1	2.34796	2.31404	10.1	1.60377	1.22483
10.12	2.37086	2.26164	10.12	1.64804	1.10834
10.14	2.34238	2.03718	10.14	1.61916	1.2281
10.16	2.56722	2.30375	10.16	1.72108	1.23559
10.18	2.3711	2.47342	10.18	1.70192	1.18869
10.2	2.11997	2.56722	10.2	1.68071	1.3188
10.22	2.29316	2.41836	10.22	1.72651	1.33499
10.24	2.32259	2.22273	10.24	1.73358	1.53437
10.26	2.25951	2.16267	10.26	1.59604	1.90364
10.28	2.09844	2.535	10.28	1.58569	1.89512
10.3	2.16358	2.49103	10.3	1.56126	1.8271
10.32	2.25849	2.38758	10.32	1.58304	1.81782
10.34	2.28548	2.34571	10.34	1.53258	1.83541
10.36	2.28303	2.4103	10.36	1.53394	1.80402
10.38	2.29162	2.54723	10.38	1.62916	1.79686
10.4	2.19734	2.15218	10.4	1.62347	1.81421
10.42	2.11414	2.4206	10.42	1.65865	1.79935
10.44	2.12954	2.57884	10.44	1.71056	1.83495
10.46	2.2336	2.627	10.46	1.59049	1.83937
10.48	2.23474	2.50434	10.48	1.60668	1.77618
10.5	2.18438	2.48553	10.5	1.68325	1.80461
10.52	2.17231	2.49966	10.52	1.79383	1.79973
10.54	2.30857	2.48676	10.54	1.64347	1.90319
10.56	2.21086	2.54162	10.56	1.73244	1.83043
10.58	2.25836	2.62925	10.58	1.71221	1.77679
10.6	2.23888	2.67197	10.6	1.78669	1.87948
10.62	2.14949	2.4243	10.62	1.73868	1.87963
10.64	2.07712	2.56287	10.64	1.72765	1.90548
10.66	2.12092	2.57745	10.66	1.6427	1.83741
10.68	2.09655	2.67017	10.68	1.70616	1.80988
10.7	2.29581	2.56094	10.7	1.62615	1.77905
10.72	2.51258	2.44833	10.72	1.62177	1.90378
10.74	2.8201	2.55059	10.74	1.66427	1.91544
10.76	2.76718	2.59649	10.76	1.6146	1.87266
10.78	2.58875	2.55545	10.78	1.61292	1.86515
10.8	2.81317	2.71625	10.8	1.6172	1.86434
10.82	2.67711	2.62435	10.82	1.66852	1.8786
10.84	2.45892	2.55467	10.84	1.62077	1.84406
10.86	2.381	2.60567	10.86	1.59312	1.89964
10.88	2.37301	2.50026	10.88	1.70514	1.94512
10.9	2.33392	2.5754	10.9	1.68574	1.8596
10.92	2.49601	2.62125	10.92	1.61339	1.86077
10.94	2.40845	2.61402	10.94	1.6859	1.84874
10.96	2.37653	2.56447	10.96	1.70758	1.94284
10.98	2.30649	2.40355	10.98	1.79764	1.90396
11	2.30068	2.53021	11	1.67012	1.91254
11.02	2.07767	2.39459	11.02	1.67533	1.86692
11.04	2.15257	2.47352	11.04	1.72535	1.36138
11.06	2.01214	2.58664	11.06	1.77315	1.7286
11.08	2.05081	2.64295	11.08	1.71204	1.15996
11.1	1.95269	2.64487	11.1	1.76669	1.19189
11.12	2.11246	2.56361	11.12	1.68998	1.16901
11.14	2.09001	2.46972	11.14	1.75716	1.24852
11.16	2.04377	2.38907	11.16	1.69512	1.14957
11.18	2.04438	2.53093	11.18	1.57727	1.24023
11.2	1.89344	2.46904	11.2	1.67378	1.12265
11.22	1.87619	2.32947	11.22	1.70863	1.45508
11.24	1.87364	2.57088	11.24	1.71271	1.15253
11.26	2.0697	2.58565	11.26	1.74859	1.19114
11.28	2.14106	2.49753	11.28	1.68376	1.16083
11.3	2.02967	2.55913	11.3	1.65513	1.18685
11.32	2.03624	2.53011	11.32	1.64947	1.42364
11.34	2.00112	2.54014	11.34	1.6685	1.56971
11.36	1.94918	2.53868	11.36	1.6802	1.35989
11.38	1.9508	2.51102	11.38	1.61652	1.57883
11.4	1.99931	2.4156	11.4	1.60392	1.15362
11.42	1.96547	2.40215	11.42	1.59423	1.3777
11.44	1.96726	2.39511	11.44	1.5681	1.34774
11.46	2.05207	2.20499	11.46	1.55026	1.21626
11.48	2.1622	2.45768	11.48	1.61243	1.1627
11.5	2.20454	2.46988	11.5	1.63478	1.06955
11.52	2.27086	2.40229	11.52	1.66127	1.14411
11.54	2.06176	2.38672	11.54	1.62921	1.30144
11.56	2.1571	2.50761	11.56	1.54629	1.44019
11.58	2.23664	2.12292	11.58	1.75217	1.23015
11.6	2.26845	2.37583	11.6	1.74767	1.32371
11.62	2.2811	2.71071	11.62	1.67367	1.25272
11.64	2.21015	2.48015	11.64	1.67208	1.48338
11.66	2.2068	2.53708	11.66	1.61381	1.3488
11.68	2.28998	2.55988	11.68	1.54988	1.27548
11.7	2.26055	2.19802	11.7	1.60813	1.3377
11.72	2.23578	2.37243	11.72	1.56601	1.30556
11.74	2.14461	2.21147	11.74	1.61135	1.43537
11.76	2.29062	2.40421	11.76	1.62799	1.16394
11.78	2.34512	2.28566	11.78	1.65515	1.23579
11.8	2.38562	2.41711	11.8	1.4679	1.27846
11.82	2.44594	2.13117	11.82	1.55274	1.24197
11.84	2.24923	2.57351	11.84	1.50892	1.19499
11.86	2.17106	2.56834	11.86	1.52113	1.23195
11.88	2.11728	2.33927	11.88	1.4452	1.24658
11.9	2.10844	2.45547	11.9	1.46223	1.28349
11.92	2.06866	1.84483	11.92	1.61342	1.2097
11.94	2.07172	2.17688	11.94	1.59043	1.68308
11.96	2.06294	2.26708	11.96	1.58923	1.23676
11.98	2.05258	2.42827	11.98	1.53321	1.20707
12	2.21019	2.20153	12	1.54327	1.30154
12.02	2.11324	2.50217	12.02	1.57032	1.29411
12.04	2.18696	2.29393	12.04	1.41936	1.36247
12.06	2.28073	2.36058	12.06	1.47267	1.25808
12.08	2.31173	2.07563	12.08	1.48601	1.25306
12.1	2.41857	2.45283	12.1	1.66303	1.11087
12.12	2.20364	2.43684	12.12	1.63083	1.26268
12.14	2.2638	2.47678	12.14	1.56083	1.25755
12.16	2.0391	2.39429	12.16	1.58682	1.26711
12.18	2.3227	2.47367	12.18	1.54809	1.35008
12.2	2.2202	2.3733	12.2	1.60359	1.23379
12.22	2.16392	2.4486	12.22	1.57583	1.33821
12.24	2.08891	2.30243	12.24	1.58788	1.22717
12.26	2.0796	2.22939	12.26	1.56068	1.14718
12.28	2.18237	2.3686	12.28	1.59151	1.35173
12.3	2.29186	2.47102	12.3	1.60543	1.32068
12.32	2.13455	2.52541	12.32	1.58905	1.43747
12.34	2.08224	2.29219	12.34	1.53269	1.35069
12.36	2.03414	2.2799	12.36	1.50458	1.47567
12.38	1.99167	2.40642	12.38	1.52944	1.22546
12.4	2.03982	2.37433	12.4	1.59014	1.38375
12.42	2.08081	2.2802	12.42	1.55211	1.16286
12.44	2.09014	2.30883	12.44	1.51389	1.11051
12.46	2.06044	2.57383	12.46	1.47114	1.12368
12.48	2.05051	2.53534	12.48	1.49695	1.14901
12.5	1.98908	2.25999	12.5	1.55472	1.29758
12.52	2.04337	2.3275	12.52	1.54107	1.1374
12.54	2.08125	2.34152	12.54	1.62287	1.23981
12.56	2.13456	2.34541	12.56	1.56458	1.64715
12.58	2.22019	2.47983	12.58	1.63601	1.39769
12.6	2.26161	2.41255	12.6	1.65367	1.21568
12.62	2.34934	2.38773	12.62	1.71969	1.76208
12.64	2.33707	2.37263	12.64	1.64919	1.83567
12.66	2.18455	2.21318	12.66	1.64343	1.85506
12.68	2.15179	2.51412	12.68	1.65304	1.33965
12.7	2.14418	2.49513	12.7	1.60329	1.17391
12.72	2.04582	2.20234	12.72	1.61877	1.18637
12.74	2.07654	2.1483	12.74	1.61652	1.23211
12.76	2.07905	2.09331	12.76	1.60238	1.2804
12.78	1.98019	2.27206	12.78	1.53706	1.26364
12.8	1.99781	2.18743	12.8	1.57039	1.34025
12.82	1.99095	2.394	12.82	1.59285	1.23133
12.84	2.06265	2.35564	12.84	1.58796	1.24399
12.86	2.02947	2.33277	12.86	1.63628	1.13954
12.88	2.05214	2.62864	12.88	1.61999	1.24663
12.9	2.03545	2.50782	12.9	1.63539	1.17852
12.92	1.98346	2.26667	12.92	1.48949	1.22558
12.94	2.00965	2.3025	12.94	1.50939	1.39217
12.96	2.03779	2.30656	12.96	1.57665	1.21257
12.98	1.98603	2.31383	12.98	1.54276	1.12394
13	2.10415	2.31697	13	1.65105	1.14541
13.02	2.09882	2.42147	13.02	1.54388	1.20376
13.04	2.07481	2.45645	13.04	1.50751	1.26108
13.06	2.00096	2.48554	13.06	1.52099	1.16628
13.08	2.03763	2.43063	13.08	1.66128	1.26271
13.1	2.21135	2.50778	13.1	1.61294	1.27161
13.12	2.24481	2.56288	13.12	1.64792	1.19735
13.14	2.0752	2.39576	13.14	1.58868	1.13853
13.16	2.2753	2.30576	13.16	1.54398	1.415
13.18	2.27028	2.48392	13.18	1.68177	1.2951
13.2	2.2303	2.29482	13.2	1.61707	1.26431
13.22	2.08115	2.54075	13.22	1.52768	1.20545
13.24	2.02011	2.42068	13.24	1.58404	1.50064
13.26	2.04976	2.4885	13.26	1.60049	1.26826
13.28	2.09222	2.28262	13.28	1.5905	1.23827
13.3	2.00413	2.41358	13.3	1.45978	1.44668
13.32	2.03044	2.09844	13.32	1.53552	1.42741
13.34	1.99998	2.36664	13.34	1.42184	1.30398
13.36	2.05846	2.32866	13.36	1.46506	1.38079
13.38	2.06819	2.33328	13.38	1.53539	1.31125
13.4	2.22665	2.27588	13.4	1.57129	1.36591
13.42	2.03395	2.21926	13.42	1.85202	1.14778
13.44	2.1445	2.4337	13.44	1.66801	1.48919
13.46	1.96838	2.35588	13.46	1.54173	1.43004
13.48	2.17568	2.26897	13.48	1.56028	1.16438
13.5	2.17865	2.31979	13.5	1.68174	1.23109
13.52	2.18963	2.12023	13.52	1.56741	1.20352
13.54	2.26687	2.30901	13.54	1.54391	1.25032
13.56	2.25738	2.41963	13.56	1.5837	1.14114
13.58	2.04287	2.38649	13.58	1.54773	1.25521
13.6	2.11648	2.24376	13.6	1.51567	1.26183
13.62	2.08659	2.33468	13.62	1.59348	1.23395
13.64	2.09747	2.45761	13.64	1.58168	1.13488
13.66	1.99628	2.5251	13.66	1.49098	1.23804
13.68	2.15303	2.32541	13.68	1.47266	1.16757
13.7	2.24478	2.31861	13.7	1.50333	1.18122
13.72	2.36147	2.42643	13.72	1.52196	1.21317
13.74	2.37512	2.12552	13.74	1.62608	1.22375
13.76	2.18185	2.26852	13.76	1.65607	1.36134
13.78	2.00118	2.2628	13.78	1.64277	1.27544
13.8	2.05996	2.19551	13.8	1.63547	1.18834
13.82	1.97317	2.257	13.82	1.57345	1.23153
13.84	1.99639	2.03384	13.84	1.53808	1.35708
13.86	2.04562	2.49304	13.86	1.55269	1.1531
13.88	2.14932	2.29337	13.88	1.49624	1.23129
13.9	1.97561	2.30436	13.9	1.50904	1.19086
13.92	2.00374	2.23613	13.92	1.46235	1.4873
13.94	2.06712	2.49713	13.94	1.53434	1.86268
13.96	2.06414	2.34024	13.96	1.59626	2.14225
13.98	2.00981	1.95673	13.98	1.49031	2.0828
14	2.06101	2.27237	14	1.50245	2.04451
14.02	2.01658	2.30307	14.02	1.65373	2.07491
14.04	1.86163	2.26892	14.04	1.74201	2.10042
14.06	2.00034	2.4248	14.06	1.6801	2.09692
14.08	1.9513	2.25126	14.08	1.55911	2.02348
14.1	2.07785	2.22707	14.1	1.55428	1.97326
14.12	2.10345	2.18744	14.12	1.51737	2.06507
14.14	2.08803	2.29254	14.14	1.53138	2.17142
14.16	2.08212	2.37935	14.16	1.42918	2.44672
14.18	1.99897	2.12097	14.18	1.47747	2.40393
14.2	2.01715	2.11784	14.2	1.45893	2.18161
14.22	1.89656	2.47831	14.22	1.49663	2.52132
14.24	1.96438	2.46823	14.24	1.56321	2.44051
14.26	2.08146	2.61844	14.26	1.52914	2.65842
14.28	2.20656	2.42163	14.28	1.47477	2.46396
14.3	2.35988	2.3231	14.3	1.57633	2.59229
14.32	2.4541	2.39788	14.32	1.51681	2.47251
14.34	2.39225	2.3294	14.34	1.56815	2.61268
14.36	2.18512	2.37758	14.36	1.59797	2.19325
14.38	2.35457	2.50904	14.38	1.59764	2.48059
14.4	2.12178	2.52797	14.4	1.5425	2.55754
14.42	2.26555	2.32598	14.42	1.56358	2.26803
14.44	2.365	2.40554	14.44	1.62132	2.45912
14.46	2.34241	2.32294	14.46	1.67481	2.65034
14.48	2.40371	2.36591	14.48	1.71466	2.28984
14.5	2.38808	2.45881	14.5	1.48159	2.58971
14.52	2.32122	2.30652	14.52	1.51043	2.74295
14.54	2.22564	2.69441	14.54	1.73667	2.4314
14.56	2.24996	2.37647	14.56	1.62966	2.508
14.58	2.44815	2.38997	14.58	1.65601	2.58034
14.6	2.33933	2.31966	14.6	1.60024	2.53532
14.62	2.47932	2.33602	14.62	1.54291	2.46817
14.64	2.40323	2.54937	14.64	1.63461	2.40648
14.66	2.32345	2.44352	14.66	1.60021	2.24315
14.68	2.27732	2.66916	14.68	1.54063	2.57674
14.7	2.39104	2.54332	14.7	1.62531	2.43565
14.72	2.48253	2.1301	14.72	1.57749	2.78847
14.74	2.35036	2.45665	14.74	1.68526	2.8604
14.76	2.4894	2.5543	14.76	1.57103	2.24681
14.78	2.60106	2.45873	14.78	1.57125	2.48122
14.8	2.45188	2.54732	14.8	1.59909	2.55622
14.82	2.78529	2.51326	14.82	1.58017	2.67921
14.84	2.92839	2.45766	14.84	1.53826	2.6576
14.86	2.83938	2.33124	14.86	1.69522	2.24217
14.88	2.80103	2.48063	14.88	1.66397	2.55965
14.9	2.68953	2.36712	14.9	1.6458	2.66255
14.92	2.76301	2.59274	14.92	1.67194	2.75806
14.94	2.65605	2.52342	14.94	1.57825	2.41182
14.96	2.73572	2.36579	14.96	1.55206	2.72054
14.98	2.9407	2.4756	14.98	1.53752	2.55881
15	3.01877	2.43648	15	1.55913	2.53082
15.02	2.96593	2.5816	15.02	1.64685	2.7082
15.04	2.86406	2.34837	15.04	1.57422	2.68568
15.06	2.85279	2.28777	15.06	1.56639	2.41721
15.08	2.97274	2.33697	15.08	1.63122	2.23757
15.1	2.74346	2.27146	15.1	1.53515	2.50365
15.12	2.78317	2.41262	15.12	1.54587	2.64755
15.14	2.72921	2.41155	15.14	1.57141	2.63662
15.16	2.82342	2.56765	15.16	1.51228	2.49107
15.18	2.87661	2.61459	15.18	1.45301	2.62743
15.2	2.95635	2.39324	15.2	1.57921	2.59041
15.22	3.17831	2.44128	15.22	1.6219	2.53097
15.24	3.00888	2.3603	15.24	1.64237	2.74114
15.26	2.99475	2.59825	15.26	1.619	2.70387
15.28	3.26025	2.60771	15.28	1.70004	2.65524
15.3	3.14436	2.22704	15.3	1.6672	2.70654
15.32	3.29611	2.30971	15.32	1.58541	2.66844
15.34	3.1598	2.26035	15.34	1.54579	2.41365
15.36	3.14259	2.47656	15.36	1.56598	2.85873
15.38	3.08638	2.56136	15.38	1.52158	2.65204
15.4	3.13333	2.44238	15.4	1.58746	2.65017
15.42	3.15673	2.43437	15.42	1.73953	2.0251
15.44	3.09028	2.32256	15.44	1.75961	2.62773
15.46	3.17453	2.57123	15.46	1.72552	2.53006
15.48	3.23748	2.38554	15.48	1.74333	2.59847
15.5	3.23428	2.2898	15.5	1.78425	2.76317
15.52	3.13441	2.1554	15.52	1.65993	2.51665
15.54	3.31251	2.39819	15.54	1.71631	2.64093
15.56	3.21866	2.56126	15.56	1.71087	2.97659
15.58	3.22764	2.29918	15.58	1.72313	2.51155
15.6	3.0928	2.30541	15.6	1.73021	2.47265
15.62	3.24591	2.263	15.62	1.72377	2.2793
15.64	3.19841	2.37274	15.64	1.66458	2.53957
15.66	3.10208	2.46781	15.66	1.67595	2.52802
15.68	3.00554	2.50595	15.68	1.64185	2.70671
15.7	2.94767	2.13786	15.7	1.72029	2.56126
15.72	3.05758	2.27964	15.72	1.71947	2.55733
15.74	3.0726	2.23367	15.74	1.58826	2.35998
15.76	2.99247	2.20979	15.76	1.55522	2.65825
15.78	3.06373	2.29016	15.78	1.59779	2.73611
15.8	3.012	2.33308	15.8	1.68002	2.71599
15.82	3.01088	2.51325	15.82	1.70847	3.11756
15.84	2.86559	2.31877	15.84	1.58938	2.80548
15.86	2.84294	2.604	15.86	1.66584	2.76817
15.88	2.98635	2.25686	15.88	1.52792	2.78973
15.9	2.95768	2.37429	15.9	1.62394	2.75281
15.92	3.04847	2.06135	15.92	1.77175	2.73176
15.94	2.81806	2.7345	15.94	1.68172	2.3689
15.96	2.84413	2.04985	15.96	1.69476	2.41375
15.98	2.89279	1.992	15.98	1.72882	2.74392
16	2.89708	2.08052	16	1.7084	2.75883
16.02	2.78055	2.38644	16.02	1.67625	2.56389
16.04	2.93402	2.21145	16.04	1.67824	2.8646
16.06	2.97803	2.41994	16.06	1.69156	2.92936
16.08	2.93619	2.39379	16.08	1.63368	2.80269
16.1	3.02941	2.29562	16.1	1.72635	2.83209
16.12	3.07209	2.21597	16.12	1.58285	2.6017
16.14	3.13863	1.96388	16.14	1.68504	2.52088
16.16	3.32683	2.44516	16.16	1.61579	2.73383
16.18	3.21383	2.31342	16.18	1.67146	2.84762
16.2	3.27794	2.14975	16.2	1.72523	2.64025
16.22	3.27547	2.0416	16.22	1.65954	2.8909
16.24	3.30281	2.18036	16.24	1.57966	2.74493
16.26	3.245	2.0233	16.26	1.72234	2.71322
16.28	3.2051	2.09021	16.28	1.60651	2.75421
16.3	3.3106	2.27066	16.3	1.77409	2.78312
16.32	3.25586	2.48342	16.32	1.76023	2.34679
16.34	3.22613	2.30151	16.34	1.62849	2.67515
16.36	3.32198	2.62595	16.36	1.62819	2.42218
16.38	3.25897	2.49028	16.38	1.69655	2.21716
16.4	3.32617	2.487	16.4	1.74096	2.57063
16.42	3.36607	2.26478	16.42	1.72017	2.75475
16.44	3.33845	2.5232	16.44	1.74425	2.43087
16.46	3.39159	2.29014	16.46	1.5129	2.80942
16.48	3.45214	2.25065	16.48	1.78841	2.64902
16.5	3.60557	2.318	16.5	1.61079	2.85838
16.52	3.53084	2.55221	16.52	1.69464	2.85007
16.54	3.55417	2.39957	16.54	1.63718	2.88164
16.56	3.39284	2.28048	16.56	1.57637	2.61545
16.58	3.44488	2.35254	16.58	1.77551	2.61006
16.6	3.51156	2.3024	16.6	1.61871	2.54907
16.62	3.30778	2.46475	16.62	1.63664	2.74687
16.64	3.06912	2.36261	16.64	1.64481	2.67551
16.66	3.17781	2.56503	16.66	1.64899	2.63315
16.68	3.19013	2.38268	16.68	1.72842	2.52633
16.7	3.16914	2.49254	16.7	1.63019	2.70747
16.72	3.06405	2.62788	16.72	1.67458	2.65116
16.74	3.10734	2.56276	16.74	1.6497	2.52718
16.76	3.15149	2.4948	16.76	1.56435	2.61092
16.78	3.23272	2.42453	16.78	1.58374	2.45327
16.8	3.235	2.46077	16.8	1.65306	2.68734
16.82	3.41581	2.27533	16.82	1.59807	2.48842
16.84	3.48486	2.35457	16.84	1.72655	2.6239
16.86	3.42543	2.51665	16.86	1.64227	2.76371
16.88	3.49889	2.46144	16.88	1.5846	2.68458
16.9	3.40545	2.44181	16.9	1.58625	2.57822
16.92	3.27179	2.41643	16.92	1.55732	2.60716
16.94	3.13383	2.55655	16.94	1.67106	2.66179
16.96	3.10519	2.31817	16.96	1.58115	2.64884
16.98	3.15609	2.46579	16.98	1.59584	2.8075
17	3.16891	2.35257	17	1.63039	2.54653
17.02	3.29116	2.36179	17.02	1.6328	2.67291
17.04	3.37998	2.38711	17.04	1.67666	2.69713
17.06	3.28752	2.62408	17.06	1.68377	2.56918
17.08	3.33687	2.64658	17.08	1.73588	2.50952
17.1	3.32774	2.38898	17.1	1.697	2.66444
17.12	3.34731	2.33909	17.12	1.51789	2.60803
17.14	3.31747	2.4516	17.14	1.62507	2.43374
17.16	3.3428	2.34561	17.16	1.63858	2.369
17.18	3.4086	2.53227	17.18	1.63022	2.64745
17.2	3.38886	2.21525	17.2	1.69071	2.54053
17.22	3.36164	2.3162	17.22	1.56196	2.72669
17.24	3.42047	2.26998	17.24	1.64023	2.56614
17.26	3.456	2.27887	17.26	1.65099	2.68099
17.28	3.4176	2.36072	17.28	1.53326	2.59642
17.3	3.35132	2.1899	17.3	1.71775	2.39297
17.32	3.38916	2.3036	17.32	1.76229	2.575
17.34	3.43869	2.32598	17.34	1.57283	2.35088
17.36	3.45279	2.18803	17.36	1.63457	2.53015
17.38	3.48819	2.46283	17.38	1.61444	2.36494
17.4	3.40958	2.51444	17.4	1.57517	2.57781
17.42	3.49688	2.21596	17.42	1.54877	2.6948
17.44	3.40333	2.14294	17.44	1.51968	2.66524
17.46	3.36715	2.39184	17.46	1.60261	2.30128
17.48	3.30104	2.30225	17.48	1.55703	2.41807
17.5	3.21968	2.33274	17.5	1.57916	2.50445
17.52	3.48198	2.32992	17.52	1.66799	2.383
17.54	3.34765	2.32242	17.54	1.66166	2.58489
17.56	3.23619	2.25599	17.56	1.66488	2.55861
17.58	3.50092	2.25681	17.58	1.80256	2.67611
17.6	3.46142	2.09322	17.6	1.8325	2.51706
17.62	3.50068	2.35307	17.62	1.72335	2.51779
17.64	3.40881	2.46782	17.64	1.79093	2.45333
17.66	3.53864	2.41973	17.66	1.70053	2.41144
17.68	3.46382	2.24882	17.68	1.69817	2.6365
17.7	3.46254	2.25727	17.7	1.76648	2.5514
17.72	3.46955	2.23777	17.72	1.63607	2.68631
17.74	3.4429	2.36347	17.74	1.66957	2.24548
17.76	3.48658	2.479	17.76	1.6936	2.37525
17.78	3.5638	2.41528	17.78	1.6695	2.58365
17.8	3.73381	2.43148	17.8	1.74709	2.53979
17.82	3.50925	2.22208	17.82	1.63339	2.60412
17.84	3.56506	2.25915	17.84	1.75459	2.53491
17.86	3.57635	2.38924	17.86	1.62061	2.35008
17.88	3.51783	2.37699	17.88	1.69242	2.48025
17.9	3.47312	2.33643	17.9	1.68303	2.39285
17.92	3.45796	2.27903	17.92	1.7262	2.55783
17.94	3.44939	2.38526	17.94	1.68518	2.6214
17.96	3.36379	2.43555	17.96	1.80518	2.13528
17.98	3.47336	2.44898	17.98	1.80869	2.40349
18	3.3491	2.25012	18	1.71982	2.34458
18.02	3.42275	2.31723	18.02	1.81823	2.39027
18.04	3.47199	2.27149	18.04	1.708	2.43698
18.06	3.51012	2.27442	18.06	1.69522	2.34349
18.08	3.58581	2.24638	18.08	1.53904	2.44778
18.1	3.56887	2.14253	18.1	1.5764	2.45673
18.12	3.5727	2.2894	18.12	1.61993	2.31107
18.14	3.70933	2.33672	18.14	1.73731	2.36763
18.16	3.64953	2.19935	18.16	1.66938	2.30329
18.18	3.44767	2.20734	18.18	1.69212	2.43022
18.2	3.54563	2.2274	18.2	1.8556	2.50465
18.22	3.59858	2.15478	18.22	1.75421	2.26948
18.24	3.62761	2.35279	18.24	1.89053	2.6695
18.26	3.46787	2.29893	18.26	1.89739	2.55306
18.28	3.52917	2.29655	18.28	1.80393	2.66886
18.3	3.62135	2.33468	18.3	1.792	2.75003
18.32	3.54385	2.269	18.32	1.75107	2.73765
18.34	3.49816	2.35122	18.34	1.82737	2.64163
18.36	3.51907	2.44024	18.36	1.92264	2.64765
18.38	3.44458	2.09089	18.38	1.82797	2.80159
18.4	3.60629	2.34195	18.4	1.7453	2.61452
18.42	3.57654	2.32956	18.42	1.70037	2.57339
18.44	3.68096	2.32333	18.44	1.66004	2.505
18.46	3.60688	2.24352	18.46	1.72941	2.73282
18.48	3.49249	2.33105	18.48	1.76155	2.34244
18.5	3.56864	2.28891	18.5	1.66769	2.32648
18.52	3.64367	2.37452	18.52	1.69292	2.57841
18.54	3.42163	2.3761	18.54	1.63096	2.66535
18.56	3.53882	2.22104	18.56	1.73398	2.17281
18.58	3.58608	2.40041	18.58	1.8525	2.26822
18.6	3.53359	2.45324	18.6	1.78016	2.30133
18.62	3.55537	2.3348	18.62	1.68572	2.63493
18.64	3.43015	2.32508	18.64	1.70247	2.7685
18.66	3.58935	2.24564	18.66	1.77631	2.67963
18.68	3.69402	2.37636	18.68	1.75796	2.37036
18.7	3.67264	2.35955	18.7	1.7176	2.8249
18.72	3.60424	2.27313	18.72	1.71975	2.69225
18.74	3.65327	2.22461	18.74	1.66466	2.72428
18.76	3.71992	2.24818	18.76	1.60945	2.46926
18.78	3.82263	2.35638	18.78	1.62138	2.8116
18.8	3.77157	2.47899	18.8	1.58671	2.53505
18.82	3.73905	2.25125	18.82	1.63818	2.4928
18.84	3.80942	2.36893	18.84	1.72522	2.30208
18.86	3.6838	2.22753	18.86	1.59467	2.34714
18.88	3.71466	2.3789	18.88	1.54266	2.17387
18.9	3.5774	2.32449	18.9	1.55429	2.52994
18.92	3.69428	2.25201	18.92	1.6964	2.59825
18.94	3.50482	2.34458	18.94	1.59812	2.89815
18.96	3.45656	2.214	18.96	1.66359	2.1789
18.98	3.6083	2.28338	18.98	1.64739	2.75859
19	3.56384	2.2788	19	1.59871	2.69646
19.02	3.61499	2.21583	19.02	1.6866	2.69142
19.04	3.40552	2.40754	19.04	1.62241	2.24002
19.06	3.47718	2.2944	19.06	1.51918	2.49933
19.08	3.46036	2.23447	19.08	1.66157	2.7468
19.1	3.57338	2.41234	19.1	1.57705	2.75581
19.12	3.6397	2.28136	19.12	1.63331	2.7798
19.14	3.55958	2.19114	19.14	1.62942	2.75216
19.16	3.54565	2.20469	19.16	1.70691	2.76893
19.18	3.37951	2.14373	19.18	1.68959	2.85838
19.2	3.39771	2.37254	19.2	1.76263	2.77858
19.22	3.49527	2.33509	19.22	1.64806	2.4582
19.24	3.4927	2.32474	19.24	1.59932	2.35474
19.26	3.39566	2.28334	19.26	1.66888	2.23436
19.28	3.6104	2.0857	19.28	1.76289	2.65908
19.3	3.55484	2.2745	19.3	1.65214	2.57766
19.32	3.57315	2.15774	19.32	1.72758	2.5509
19.34	3.60025	2.20894	19.34	1.69433	2.36884
19.36	3.67036	2.40848	19.36	1.64459	2.55192
19.38	3.53677	2.29288	19.38	1.64951	2.51886
19.4	3.61782	2.36475	19.4	1.61931	2.55959
19.42	3.6531	2.29712	19.42	1.7602	2.69634
19.44	3.65247	2.00905	19.44	1.72213	2.5536
19.46	3.79873	2.57615	19.46	1.78614	2.66233
19.48	3.79523	2.17359	19.48	1.74405	2.62129
19.5	3.73048	2.1507	19.5	1.65928	2.41017
19.52	3.8953	2.32195	19.52	1.79089	2.55892
19.54	3.75157	1.96386	19.54	1.75733	2.72916
19.56	3.96192	1.99315	19.56	1.81337	2.6622
19.58	4.02281	2.49706	19.58	1.73365	2.74685
19.6	3.96118	2.54785	19.6	1.78767	2.49437
19.62	3.92526	2.47709	19.62	1.85435	2.22226
19.64	3.77112	2.44836	19.64	1.86716	2.27773
19.66	3.84638	2.39042	19.66	1.87305	2.62344
19.68	3.79925	2.47657	19.68	1.82466	2.43971
19.7	3.75515	2.39779	19.7	1.82666	2.30013
19.72	3.79185	2.37841	19.72	1.74347	2.19982
19.74	3.74084	2.23281	19.74	1.66867	2.2368
19.76	3.67718	2.45688	19.76	1.63214	2.63077
19.78	3.77181	2.12953	19.78	1.62924	2.27586
19.8	3.71483	2.26078	19.8	1.70641	2.28494
19.82	3.79911	2.35656	19.82	1.61621	2.35737
19.84	3.93518	2.39502	19.84	1.76639	2.57936
19.86	3.99077	2.38918	19.86	1.72104	2.71583
19.88	3.76124	2.51712	19.88	1.72639	2.89943
19.9	3.62418	2.39402	19.9	1.7288	2.51782
19.92	3.80953	2.42817	19.92	1.64647	2.55791
19.94	3.65164	2.30151	19.94	1.73477	2.39686
19.96	3.56022	2.12829	19.96	1.74329	2.45799
19.98	3.45592	2.32754	19.98	1.72629	2.44704
20	3.37981	2.33793	20	1.76234	2.93322
20.02	3.49077	2.27288	20.02	1.68323	2.57251
20.04	3.40759	2.28293	20.04	1.73355	2.38616
20.06	3.38672	2.37762	20.06	1.67886	2.21646
20.08	3.28839	2.41722	20.08	1.64089	2.5303
20.1	3.35658	2.51283	20.1	1.7814	2.30721
20.12	3.43922	2.3902	20.12	1.79614	2.82415
20.14	3.64508	2.59295	20.14	1.80388	2.54461
20.16	3.56288	2.447	20.16	1.67098	2.35813
20.18	3.54592	2.31299	20.18	1.67615	2.54778
20.2	3.5501	2.47361	20.2	1.77718	2.27891
20.22	3.47684	2.36415	20.22	1.80066	2.63786
20.24	3.61605	2.47891	20.24	1.79336	2.73034
20.26	3.47398	2.48821	20.26	1.84182	2.61851
20.28	3.46556	2.48897	20.28	1.93974	2.55551
20.3	3.52175	2.46989	20.3	1.95776	2.7604
20.32	3.37336	2.59754	20.32	1.92465	2.75538
20.34	3.35463	2.29205	20.34	1.86755	2.58709
20.36	3.3577	2.44226	20.36	1.90378	2.61274
20.38	3.3714	2.34684	20.38	1.85733	2.59105
20.4	3.43997	2.238	20.4	1.89219	2.64072
20.42	3.30757	2.54812	20.42	1.79542	2.56573
20.44	3.40204	2.37754	20.44	1.808	2.52953
20.46	3.45925	2.42859	20.46	1.87065	2.75088
20.48	3.58398	2.47628	20.48	1.7828	2.73487
20.5	3.44054	2.48755	20.5	1.83042	2.42107
20.52	3.45404	2.46311	20.52	1.80751	2.55658
20.54	3.6341	2.31242	20.54	1.75172	2.33195
20.56	3.41571	2.3913	20.56	1.88141	2.53834
20.58	3.35037	2.46439	20.58	1.72086	2.65148
20.6	3.32053	2.31664	20.6	1.80108	2.61955
20.62	3.23359	2.48386	20.62	1.93314	2.61842
20.64	3.35054	2.3332	20.64	1.78399	2.5681
20.66	3.34386	2.44786	20.66	1.79217	2.62227
20.68	3.23884	2.49024	20.68	1.80356	2.28466
20.7	3.34604	2.36623	20.7	1.8224	2.41243
20.72	3.33894	2.33667	20.72	1.81644	2.48001
20.74	3.42043	2.41919	20.74	1.8593	2.62081
20.76	3.44313	2.49983	20.76	1.72171	2.73927
20.78	3.33594	2.46119	20.78	1.69589	2.74106
20.8	3.30206	2.2572	20.8	1.80525	2.52451
20.82	3.30925	2.37922	20.82	1.72959	2.57334
20.84	3.22913	2.57257	20.84	1.72184	2.52727
20.86	3.3468	2.49035	20.86	1.75623	2.55204
20.88	3.43553	2.4836	20.88	1.75719	2.69445
20.9	3.34901	2.45198	20.9	1.83605	2.63473
20.92	3.20447	2.38287	20.92	1.79989	2.53802
20.94	3.25549	2.54571	20.94	1.80678	2.33701
20.96	3.27234	2.48677	20.96	1.79386	2.39125
20.98	3.41086	2.34336	20.98	1.91387	2.37685
21	3.2857	2.43464	21	1.79946	2.62323
21.02	3.44422	2.56	21.02	1.74946	2.29795
21.04	3.22242	2.36247	21.04	1.80867	2.57365
21.06	3.24791	2.54583	21.06	1.69322	2.47697
21.08	3.28423	2.45603	21.08	1.69439	2.32001
21.1	3.36734	2.60152	21.1	1.75605	2.39187
21.12	3.40276	2.46661	21.12	1.70483	2.54976
21.14	3.30992	2.16069	21.14	1.81357	2.77172
21.16	3.14072	2.41867	21.16	1.63861	2.59564
21.18	3.33952	2.31024	21.18	1.67693	2.89623
21.2	3.24901	2.28868	21.2	1.70069	2.56101
21.22	3.33481	2.36864	21.22	1.77712	2.41583
21.24	3.44641	2.54524	21.24	1.84434	2.75379
21.26	3.33813	2.32423	21.26	1.83137	2.37459
21.28	3.24269	2.38834	21.28	1.81409	2.32285
21.3	3.17839	2.37036	21.3	1.78378	2.67587
21.32	3.27342	2.38932	21.32	1.74011	2.46951
21.34	3.13985	2.58599	21.34	1.77579	2.64674
21.36	3.3773	2.54615	21.36	1.78933	2.69543
21.38	3.27855	2.32092	21.38	1.7397	2.68868
21.4	3.40269	2.38995	21.4	1.72662	2.51899
21.42	3.24121	2.37038	21.42	1.66539	2.74408
21.44	3.31701	2.44449	21.44	1.75137	2.71375
21.46	3.4418	2.44809	21.46	1.62492	2.57782
21.48	3.47351	2.39641	21.48	1.70991	2.52494
21.5	3.40724	2.26618	21.5	1.63513	2.47012
21.52	3.42415	2.40751	21.52	1.69094	2.2427
21.54	3.50776	2.39991	21.54	1.63998	2.68659
21.56	3.2484	2.21822	21.56	1.72056	2.65408
21.58	3.21847	2.44417	21.58	1.74821	2.68147
21.6	3.20993	2.28698	21.6	1.77298	2.49171
21.62	3.05389	2.41893	21.62	1.6623	2.53035
21.64	3.15724	2.43815	21.64	1.69489	2.57086
21.66	3.39905	2.57653	21.66	1.7021	2.73939
21.68	3.39487	2.66666	21.68	1.72396	2.33352
21.7	3.3929	2.48316	21.7	1.73324	2.69675
21.72	3.34273	2.37414	21.72	1.69627	2.40995
21.74	3.31925	2.42845	21.74	1.6846	2.20259
21.76	3.4435	2.35553	21.76	1.76101	2.26033
21.78	3.57204	2.31518	21.78	1.80922	2.51538
21.8	3.60365	2.58456	21.8	1.76071	2.58197
21.82	3.52927	2.5603	21.82	1.70462	2.4759
21.84	3.61815	2.43386	21.84	1.67599	2.2188
21.86	3.44862	2.50565	21.86	1.84475	2.247
21.88	3.52499	2.40077	21.88	1.73556	2.39927
21.9	3.41687	2.58703	21.9	1.72171	2.51847
21.92	3.44925	2.41462	21.92	1.66323	2.4346
21.94	3.36843	2.37115	21.94	1.73536	2.50207
21.96	3.5098	2.51293	21.96	1.659	2.10314
21.98	3.51954	2.40161	21.98	1.69473	2.7244
22	3.50314	2.39681	22	1.7446	2.56036
22.02	3.46122	2.2226	22.02	1.79184	2.38095
22.04	3.49929	1.98221	22.04	1.83562	2.16737
22.06	3.58783	2.16824	22.06	1.75053	2.24268
22.08	3.53964	2.40247	22.08	1.77969	2.33478
22.1	3.47636	2.41381	22.1	1.78328	2.44213
22.12	3.403	2.17682	22.12	1.83559	2.54084
22.14	3.38976	2.27341	22.14	1.7526	2.64379
22.16	3.2185	2.31198	22.16	1.82331	2.14472
22.18	3.16866	2.55038	22.18	1.92067	2.52817
22.2	3.17189	2.48685	22.2	1.88529	2.60083
22.22	3.15985	2.41287	22.22	1.85886	2.23843
22.24	3.11224	2.464	22.24	1.79151	2.24857
22.26	3.06661	2.32637	22.26	1.77544	2.56191
22.28	3.17647	2.32721	22.28	1.9268	2.47525
22.3	3.01163	2.33008	22.3	1.73749	2.51434
22.32	3.09392	2.40896	22.32	1.87299	2.68328
22.34	2.92962	2.28005	22.34	1.8447	2.5913
22.36	2.95582	2.49698	22.36	1.84513	2.53264
22.38	2.98508	2.36494	22.38	1.73189	2.61961
22.4	3.08365	2.52723	22.4	1.83115	2.48538
22.42	3.03888	2.46398	22.42	1.8144	2.38409
22.44	3.02387	2.15461	22.44	1.83758	2.49971
22.46	2.94959	1.90286	22.46	1.90123	2.42832
22.48	2.99856	2.22255	22.48	1.78701	2.32343
22.5	3.12763	2.17617	22.5	1.92565	2.36358
22.52	3.18268	2.29579	22.52	1.9434	2.51003
22.54	3.29464	2.59071	22.54	1.94079	2.35859
22.56	3.25486	2.46875	22.56	2.01386	2.09251
22.58	3.37489	2.35723	22.58	1.8078	2.414
22.6	3.43992	2.31187	22.6	1.91376	2.30824
22.62	3.34365	2.42912	22.62	1.97234	2.33495
22.64	3.38427	2.36876	22.64	1.90101	2.27968
22.66	3.31473	2.0491	22.66	1.88945	2.37423
22.68	3.32529	2.45412	22.68	1.98437	2.40406
22.7	3.30704	2.40218	22.7	1.93739	2.41518
22.72	3.35123	2.55251	22.72	1.91944	2.66931
22.74	3.43016	2.40583	22.74	1.81686	2.69497
22.76	3.48427	2.21593	22.76	1.86611	2.65938
22.78	3.21697	2.0882	22.78	1.92171	2.94725
22.8	3.16641	2.32835	22.8	2.01563	2.64498
22.82	3.21742	2.29163	22.82	1.98332	2.73957
22.84	3.3562	2.38496	22.84	1.99759	2.7583
22.86	3.57646	2.73448	22.86	1.86467	2.59302
22.88	3.57257	2.30477	22.88	1.94417	2.38293
22.9	3.4434	2.49729	22.9	2.00893	2.48413
22.92	3.3725	2.51323	22.92	1.96774	2.78587
22.94	3.46135	2.59467	22.94	2.02689	2.79123
22.96	3.49868	2.41111	22.96	1.96612	2.63266
22.98	3.48663	2.4046	22.98	1.96515	2.37436
23	3.54826	2.36452	23	1.91017	1.21265
23.02	3.41987	2.2971	23.02	1.85087	1.52019
23.04	3.37564	2.4582	23.04	1.99565	1.3568
23.06	3.37845	2.52718	23.06	2.03118	1.59261
23.08	3.43992	2.29441	23.08	2.06592	1.63054
23.1	3.47372	2.38151	23.1	1.90962	1.62954
23.12	3.29122	2.33894	23.12	1.82823	1.41801
23.14	3.1991	2.36448	23.14	1.88978	1.64376
23.16	3.13213	2.60933	23.16	1.93769	1.57643
23.18	3.25273	2.49228	23.18	1.89349	1.55471
23.2	3.34215	2.32765	23.2	1.81182	1.8758
23.22	3.28036	2.44648	23.22	1.9021	1.55677
23.24	3.30665	2.15158	23.24	1.76754	1.37718
23.26	3.56893	2.25998	23.26	1.82269	2.25404
23.28	3.33698	2.28814	23.28	1.85534	2.39649
23.3	3.31866	2.2528	23.3	1.74404	2.63522
23.32	3.35161	2.29969	23.32	1.79951	2.39846
23.34	3.34924	2.07001	23.34	1.88436	2.52322
23.36	3.48727	2.29029	23.36	1.91803	2.38997
23.38	3.61484	2.43687	23.38	1.84977	2.38379
23.4	3.80467	2.4715	23.4	1.79436	2.506
23.42	3.67069	2.08252	23.42	1.69329	2.37414
23.44	3.82229	2.5603	23.44	1.81362	2.58188
23.46	3.86821	2.34915	23.46	1.86577	2.21173
23.48	3.86388	2.5284	23.48	1.75428	2.56711
23.5	3.99454	2.1719	23.5	1.75498	2.30734
23.52	4.07194	2.44929	23.52	1.75388	2.67218
23.54	3.95509	2.57943	23.54	1.80682	2.76107
23.56	3.87155	2.19683	23.56	1.92683	2.37616
23.58	3.99645	2.29815	23.58	1.77786	2.51787
23.6	3.99015	2.48684	23.6	1.86241	2.45404
23.62	3.96364	2.27245	23.62	1.86414	2.11376
23.64	4.00785	2.36659	23.64	1.79454	2.66275
23.66	3.95489	2.07425	23.66	1.8489	2.7806
23.68	3.96861	2.56846	23.68	1.93079	2.55742
23.7	3.99545	2.35173	23.7	1.9255	2.58601
23.72	3.91128	2.3655	23.72	1.93431	2.58139
23.74	3.93903	2.30859	23.74	1.89614	2.70833
23.76	3.80343	2.23452	23.76	2.03135	2.47601
23.78	3.74394	2.40836	23.78	1.83825	2.31472
23.8	3.83688	2.39893	23.8	1.93268	2.59368
23.82	3.95288	2.30373	23.82	1.95878	2.45367
23.84	3.83682	2.35362	23.84	1.97086	2.4608
23.86	3.8864	2.25418	23.86	1.94398	2.59414
23.88	3.79812	2.49229	23.88	1.87081	2.36349
23.9	3.76047	2.45237	23.9	1.8552	2.33429
23.92	3.80053	2.28891	23.92	1.89541	2.33592
23.94	3.77566	2.15079	23.94	1.96374	2.73615
23.96	3.81464	2.54088	23.96	1.84727	2.37191
23.98	3.75706	2.41203	23.98	1.73535	2.5638
24	3.72424	2.2986	24	1.85488	2.40682
24.02	3.60752	2.41884	24.02	1.93614	2.60554
24.04	3.62902	2.40571	24.04	1.82948	2.47613
24.06	3.60596	2.27827	24.06	1.79393	2.58394
24.08	3.49319	2.55803	24.08	1.9451	2.36783
24.1	3.52351	2.61901	24.1	1.85976	2.39881
24.12	3.44374	2.37896	24.12	1.7782	2.45571
24.14	3.5548	2.49531	24.14	1.69924	2.40948
24.16	3.40115	2.50366	24.16	1.84717	2.36968
24.18	3.47046	2.37828	24.18	1.89762	2.4973
24.2	3.42572	2.36032	24.2	1.91081	2.5804
24.22	3.51831	2.47308	24.22	1.93989	2.65948
24.24	3.61733	2.37284	24.24	1.95104	2.71132
24.26	3.40491	2.16877	24.26	1.95299	2.5737
24.28	3.4684	2.60305	24.28	1.9547	2.45677
24.3	3.36618	2.55694	24.3	1.95058	2.52306
24.32	3.47633	2.44719	24.32	2.08082	2.44439
24.34	3.4877	2.48122	24.34	2.08043	2.74075
24.36	3.263	2.17789	24.36	1.95155	2.58956
24.38	3.33591	2.50091	24.38	1.96721	2.47043
24.4	3.42705	2.39003	24.4	1.84634	2.65747
24.42	3.42894	2.21564	24.42	1.83008	2.20476
24.44	3.39222	2.18817	24.44	1.87876	2.51798
24.46	3.2573	2.31482	24.46	1.88539	2.44769
24.48	3.36038	2.25758	24.48	1.81939	2.14019
24.5	3.34385	2.4224	24.5	1.87614	2.41681
24.52	3.30747	2.25728	24.52	1.9208	2.3419
24.54	3.16157	2.35504	24.54	1.82812	2.38168
24.56	3.30627	2.33233	24.56	1.89658	2.11827
24.58	3.33696	2.38127	24.58	1.82643	2.07538
24.6	3.37303	2.48148	24.6	1.75362	2.14494
24.62	3.27923	2.42657	24.62	1.75622	2.37011
24.64	3.27645	2.44553	24.64	1.76965	2.19243
24.66	3.20352	2.42046	24.66	1.80605	2.26312
24.68	3.15414	2.40896	24.68	1.82368	2.52381
24.7	2.96756	2.36166	24.7	1.80639	2.40523
24.72	3.26468	2.42877	24.72	1.83208	2.68279
24.74	3.03614	2.31279	24.74	1.80653	2.10036
24.76	3.04789	2.64253	24.76	1.75313	2.17319
24.78	3.12489	2.54858	24.78	1.80772	2.15247
24.8	3.14975	2.30608	24.8	1.73391	2.5585
24.82	3.13146	2.58434	24.82	1.76219	2.52545
24.84	3.15582	2.62913	24.84	1.72604	2.23556
24.86	3.16122	2.17652	24.86	1.83534	2.01014
24.88	3.2468	2.44468	24.88	1.74556	2.33366
24.9	3.1465	2.32102	24.9	1.89662	2.36829
24.92	3.01455	2.33514	24.92	1.76291	2.57537
24.94	3.00885	2.29758	24.94	1.79063	2.75641
24.96	2.87306	2.46768	24.96	1.76028	2.17286
24.98	3.06262	2.51179	24.98	1.7552	2.42303
25	3.13022	2.45608	25	1.86762	2.31093
25.02	3.21594	2.51008	25.02	1.83608	2.54218
25.04	3.25524	2.61008	25.04	1.81652	2.64731
25.06	3.17296	2.47949	25.06	1.70441	2.65113
25.08	3.17771	2.67681	25.08	1.78995	2.68711
25.1	3.26202	2.54226	25.1	1.69998	2.61902
25.12	3.2944	2.49472	25.12	1.74753	2.47876
25.14	3.42587	2.40238	25.14	1.76503	2.51139
25.16	3.42458	2.48096	25.16	1.73173	2.20189
25.18	3.48162	2.48451	25.18	1.77049	2.386
25.2	3.17752	2.56182	25.2	1.71981	2.36962
25.22	3.2729	2.36651	25.22	1.85849	2.58891
25.24	3.20674	2.33319	25.24	1.76458	2.1968
25.26	3.16342	2.48599	25.26	1.74651	2.0635
25.28	3.21756	2.72512	25.28	1.72765	2.36468
25.3	3.3225	2.49055	25.3	1.76712	2.58616
25.32	3.29525	2.40609	25.32	1.86632	2.37382
25.34	3.41926	2.46682	25.34	1.5819	2.75319
25.36	3.21755	2.51958	25.36	1.71007	2.56495
25.38	3.27218	2.54846	25.38	1.56975	2.67392
25.4	3.31115	2.3674	25.4	1.70255	2.78451
25.42	3.24099	2.13516	25.42	1.72785	2.75297
25.44	3.14655	2.41581	25.44	1.75718	2.6019
25.46	3.31919	2.33594	25.46	1.82703	2.36503
25.48	3.17615	2.08639	25.48	1.71782	2.68591
25.5	3.15038	2.26198	25.5	1.72186	2.67601
25.52	3.08212	2.38723	25.52	1.67751	2.54773
25.54	3.08106	2.20285	25.54	1.76289	2.7305
25.56	3.12787	2.31192	25.56	1.85209	2.62969
25.58	3.14306	2.34388	25.58	1.72421	2.70601
25.6	3.09733	2.3896	25.6	1.68931	2.63694
25.62	3.10263	2.41215	25.62	1.76786	2.86278
25.64	2.98305	2.45267	25.64	1.83106	2.59618
25.66	3.13316	2.59118	25.66	1.72194	2.62535
25.68	3.259	2.60532	25.68	1.74872	2.63313
25.7	3.35207	2.39454	25.7	1.77663	2.65477
25.72	3.1754	2.51505	25.72	1.71906	2.57089
25.74	3.32929	2.44971	25.74	1.81731	2.70826
25.76	3.35626	2.38611	25.76	1.76072	2.70835
25.78	3.26078	2.48125	25.78	1.88673	2.76757
25.8	3.25446	2.35218	25.8	1.89878	2.67934
25.82	3.24189	2.18385	25.82	1.77229	2.44884
25.84	3.22959	2.1435	25.84	1.83539	2.69268
25.86	3.32945	2.43069	25.86	1.84702	2.61184
25.88	3.27419	2.3862	25.88	1.97043	2.73956
25.9	3.40862	2.21845	25.9	1.87038	2.53098
25.92	3.46154	2.56103	25.92	1.83402	2.52628
25.94	3.46985	2.40385	25.94	1.92429	2.47435
25.96	3.44577	2.27827	25.96	1.77545	2.39686
25.98	3.3471	2.41493	25.98	1.83468	2.60421
26	3.47191	2.34557	26	1.93451	2.6673
26.02	3.41501	2.50648	26.02	1.73772	2.34734
26.04	3.3702	2.57117	26.04	1.62198	2.38225
26.06	3.37773	2.61232	26.06	1.70304	2.29248
26.08	3.35	2.62896	26.08	1.60728	2.28641
26.1	3.28472	2.46936	26.1	1.71776	2.29045
26.12	3.22927	2.42943	26.12	1.63308	2.41457
26.14	3.31071	2.66134	26.14	1.67452	2.39135
26.16	3.26118	2.44247	26.16	1.50259	2.45726
26.18	3.32215	2.44373	26.18	1.59525	2.50491
26.2	3.17429	2.35194	26.2	1.59583	2.33439
26.22	3.33876	2.54104	26.22	1.66819	2.28802
26.24	3.30428	2.21361	26.24	1.55039	2.49861
26.26	3.17962	2.55346	26.26	1.66363	2.54919
26.28	3.22109	2.33391	26.28	1.6216	2.40903
26.3	3.22482	2.27252	26.3	1.72747	2.43986
26.32	3.32494	2.42697	26.32	1.66581	2.34937
26.34	3.26386	2.34499	26.34	1.70253	2.43965
26.36	3.14211	2.41458	26.36	1.77036	2.25004
26.38	3.14294	2.37612	26.38	1.76287	2.38343
26.4	2.92586	2.41589	26.4	1.69485	2.45556
26.42	2.93898	2.25092	26.42	1.70986	2.51856
26.44	3.11811	2.52297	26.44	1.7358	2.51488
26.46	3.19826	2.27446	26.46	1.66652	2.17656
26.48	3.34587	2.39591	26.48	1.77297	2.32378
26.5	3.27371	2.64466	26.5	1.66585	2.54455
26.52	3.28522	2.56047	26.52	1.66517	2.30533
26.54	3.3744	2.64182	26.54	1.71195	2.39398
26.56	3.47352	2.48447	26.56	1.6134	2.46275
26.58	3.36687	2.49932	26.58	1.80196	2.52044
26.6	3.2512	2.55976	26.6	1.74222	2.66809
26.62	3.21726	2.52768	26.62	1.70843	2.29867
26.64	3.39761	2.65339	26.64	1.69308	2.44475
26.66	3.35984	2.61223	26.66	1.81239	2.33509
26.68	3.26866	2.62618	26.68	1.6487	2.39674
26.7	3.34456	2.68136	26.7	1.75754	2.24481
26.72	3.16621	2.64009	26.72	1.67349	2.4173
26.74	3.16647	2.65778	26.74	1.7537	2.38193
26.76	3.23336	2.53156	26.76	1.80303	2.5641
26.78	3.30322	2.43496	26.78	1.71892	2.4069
26.8	3.43044	2.46854	26.8	1.70777	2.30627
26.82	3.39337	2.49847	26.82	1.86596	2.43032
26.84	3.3789	2.46638	26.84	1.81967	2.54365
26.86	3.24913	2.58229	26.86	1.73633	2.47836
26.88	3.15128	2.59113	26.88	1.62556	2.43935
26.9	3.19498	2.42361	26.9	1.60748	2.43688
26.92	3.06229	2.63868	26.92	1.59558	2.41193
26.94	3.29382	2.47063	26.94	1.55156	2.62415
26.96	3.42132	2.54002	26.96	1.49917	2.46552
26.98	3.36652	2.42712	26.98	1.61059	2.45481
27	3.28205	2.56862	27	1.61163	2.51491
27.02	3.37768	2.54168	27.02	1.72075	2.34608
27.04	3.22431	2.48903	27.04	1.63191	2.6399
27.06	3.31545	2.5268	27.06	1.69133	2.50384
27.08	3.12217	2.59684	27.08	1.64508	2.46236
27.1	3.01071	2.41733	27.1	1.60122	2.19462
27.12	3.1723	2.41985	27.12	1.6475	2.29225
27.14	3.17058	2.54613	27.14	1.64229	2.34245
27.16	3.13764	2.51723	27.16	1.65213	2.20755
27.18	3.04329	2.7218	27.18	1.60295	2.14494
27.2	3.09151	2.5175	27.2	1.6612	2.5121
27.22	3.09017	2.39942	27.22	1.7213	2.67938
27.24	3.06979	2.32142	27.24	1.73824	2.27838
27.26	3.20769	2.38354	27.26	1.82414	2.47691
27.28	3.16693	2.47645	27.28	1.97213	2.46602
27.3	3.26713	2.64726	27.3	1.69596	2.40664
27.32	3.21195	2.26501	27.32	1.77594	2.32509
27.34	3.25198	2.50577	27.34	1.65499	2.56137
27.36	3.19635	2.38316	27.36	1.67951	2.42645
27.38	3.00105	2.36339	27.38	1.64994	2.06779
27.4	3.12448	2.06744	27.4	1.66294	2.43987
27.42	3.13896	2.31411	27.42	1.71491	2.41152
27.44	2.96698	2.0494	27.44	1.64414	2.3521
27.46	2.99926	2.29727	27.46	1.62513	2.28905
27.48	2.95563	2.58337	27.48	1.54479	2.52242
27.5	2.90849	2.41377	27.5	1.60432	2.41376
27.52	3.06599	2.22223	27.52	1.71174	2.24846
27.54	2.97881	2.14031	27.54	1.66599	2.33597
27.56	3.04598	2.538	27.56	1.60338	2.34066
27.58	2.7498	2.37201	27.58	1.73837	2.43147
27.6	2.58869	2.33977	27.6	1.78774	2.54114
27.62	2.65184	2.39023	27.62	1.66413	2.42874
27.64	2.83842	2.22063	27.64	1.61619	2.5488
27.66	2.87395	2.21178	27.66	1.57706	2.37089
27.68	3.08069	2.49213	27.68	1.60723	2.38607
27.7	3.15427	2.33176	27.7	1.50209	2.42235
27.72	3.17021	2.58511	27.72	1.54428	2.44557
27.74	2.97821	2.39983	27.74	1.67121	2.38518
27.76	2.95999	2.33529	27.76	1.58087	2.68066
27.78	3.0641	2.41139	27.78	1.59749	2.7129
27.8	3.16048	2.36316	27.8	1.59834	2.4386
27.82	2.91338	2.61414	27.82	1.5679	2.61492
27.84	3.20017	2.49023	27.84	1.47936	2.33138
27.86	3.07254	2.42703	27.86	1.59981	2.36434
27.88	2.97712	2.45692	27.88	1.58771	2.41179
27.9	3.11912	2.31955	27.9	1.52113	2.44463
27.92	3.03313	2.43756	27.92	1.60927	2.42311
27.94	3.11449	2.42014	27.94	1.53824	2.47134
27.96	3.0884	2.70343	27.96	1.61076	2.26886
27.98	3.2048	2.47095	27.98	1.53851	2.28579
28	3.1881	2.53948	28	1.55019	2.43155
28.02	3.17289	2.63456	28.02	1.4586	2.32895
28.04	3.02461	2.57386	28.04	1.58949	2.41755
28.06	3.12452	2.55929	28.06	1.52913	2.32294
28.08	3.17186	2.55789	28.08	1.48456	2.4148
28.1	3.24204	2.37142	28.1	1.62573	2.34853
28.12	3.21355	2.54561	28.12	1.5471	2.51128
28.14	3.15226	2.48946	28.14	1.61416	2.37844
28.16	3.18073	2.38112	28.16	1.57711	2.43472
28.18	3.15551	2.35646	28.18	1.74441	2.6032
28.2	3.05253	2.46973	28.2	1.69792	2.51708
28.22	3.0507	2.44671	28.22	1.65636	2.54444
28.24	3.24808	2.52637	28.24	1.65666	2.44189
28.26	3.21511	2.48489	28.26	1.6919	2.59905
28.28	3.03873	2.47744	28.28	1.64699	2.42067
28.3	3.13198	2.48273	28.3	1.64009	2.33794
28.32	3.20049	2.64568	28.32	1.65175	2.44724
28.34	3.33189	2.51528	28.34	1.69117	2.41901
28.36	3.40674	2.44358	28.36	1.59325	2.46905
28.38	3.57009	2.3942	28.38	1.55515	2.41886
28.4	3.48916	2.51986	28.4	1.69305	2.67233
28.42	3.57565	2.32306	28.42	1.65542	2.39032
28.44	3.56204	2.47431	28.44	1.70428	2.61107
28.46	3.48514	2.61656	28.46	1.71529	2.64022
28.48	3.40701	2.5233	28.48	1.57438	2.42659
28.5	3.58453	2.6787	28.5	1.60627	2.81927
28.52	3.52114	2.6234	28.52	1.62279	2.77547
28.54	3.42404	2.39704	28.54	1.71149	2.54771
28.56	3.38093	2.37753	28.56	1.77814	2.88074
28.58	3.35516	2.43586	28.58	1.69406	2.61902
28.6	3.41755	2.39806	28.6	1.72593	2.74567
28.62	3.21411	2.55687	28.62	1.63233	2.67949
28.64	3.28498	2.41655	28.64	1.70607	2.68552
28.66	3.35542	2.24162	28.66	1.78948	2.5964
28.68	3.49789	2.30356	28.68	1.66835	2.57187
28.7	3.58583	2.4605	28.7	1.61505	2.74388
28.72	3.55378	2.56344	28.72	1.66403	2.40442
28.74	3.72766	2.61588	28.74	1.59758	2.46957
28.76	3.67987	2.51972	28.76	1.62654	2.52677
28.78	3.69004	2.66699	28.78	1.75032	2.98173
28.8	3.60324	2.42954	28.8	1.61762	2.69098
28.82	3.83442	2.58986	28.82	1.69035	2.42072
28.84	3.6043	2.40719	28.84	1.72369	2.66661
28.86	3.57446	2.53392	28.86	1.644	2.56963
28.88	3.80426	2.38527	28.88	1.85203	2.76952
28.9	3.66201	2.54028	28.9	1.84133	2.58085
28.92	3.77199	2.59272	28.92	1.80069	2.75592
28.94	3.81092	2.55848	28.94	1.67366	2.8336
28.96	3.7996	2.50262	28.96	1.65612	2.61561
28.98	3.96767	2.5332	28.98	1.80655	2.76699
29	3.72695	2.45074	29	1.70781	2.54855
29.02	3.80967	2.41386	29.02	1.77908	2.50143
29.04	3.67283	2.55474	29.04	1.76228	2.52804
29.06	4.03426	2.28071	29.06	1.66567	2.72635
29.08	3.88218	2.33392	29.08	1.85219	2.75148
29.1	3.89753	2.38669	29.1	1.80129	2.67798
29.12	3.9526	2.52231	29.12	1.80361	2.76698
29.14	4.08022	2.32337	29.14	1.78845	2.67743
29.16	4.11239	2.37112	29.16	1.8159	2.71605
29.18	4.25409	2.31554	29.18	1.81052	2.68218
29.2	4.03883	2.16647	29.2	1.72922	2.75531
29.22	3.99782	2.28648	29.22	1.71057	2.58292
29.24	4.04887	2.2733	29.24	1.67249	2.11962
29.26	3.96242	2.3691	29.26	1.75592	2.18813
29.28	3.96073	2.10655	29.28	1.7105	2.39993
29.3	3.78926	2.33966	29.3	1.70696	2.74791
29.32	3.94857	2.24218	29.32	1.75903	2.70424
29.34	3.98774	2.15871	29.34	1.81114	2.53677
29.36	4.09757	1.99701	29.36	1.87526	2.34374
29.38	4.22114	2.22332	29.38	1.91072	2.44437
29.4	4.13688	2.38155	29.4	1.82537	2.58449
29.42	3.99905	2.55369	29.42	1.85212	2.70715
29.44	4.20508	2.50211	29.44	1.59213	2.55582
29.46	4.15751	2.44989	29.46	1.67537	2.45605
29.48	4.0794	2.45957	29.48	1.84477	2.64688
29.5	4.02086	2.13346	29.5	1.84307	2.7158
29.52	3.86471	2.32949	29.52	1.71142	2.61083
29.54	3.744	2.41633	29.54	1.71018	2.47662
29.56	3.73784	2.64374	29.56	1.80245	2.31594
29.58	3.75985	2.54842	29.58	1.7158	2.44001
29.6	3.85032	2.35934	29.6	1.78039	2.44175
29.62	3.92171	2.1795	29.62	1.84452	2.38077
29.64	3.85404	2.34658	29.64	1.86102	2.38089
29.66	3.95412	2.45205	29.66	1.76458	2.44526
29.68	4.0176	2.41707	29.68	1.72666	2.41123
29.7	3.92861	2.31313	29.7	1.77172	2.29968
29.72	3.72126	2.6008	29.72	1.81558	2.46215
29.74	3.6113	2.53288	29.74	1.89827	2.44121
29.76	3.64857	2.60002	29.76	1.7941	2.60174
29.78	3.84713	2.18224	29.78	1.80491	2.57206
29.8	3.79892	2.17156	29.8	1.88069	2.44793
29.82	3.83604	2.43809	29.82	1.81985	2.45881
29.84	3.82392	2.61724	29.84	1.86728	2.30652
29.86	3.84011	2.21985	29.86	1.90286	2.48213
29.88	3.72496	2.39079	29.88	1.8616	2.49386
29.9	3.88695	2.17706	29.9	1.80588	2.75167
29.92	3.96822	2.44794	29.92	1.94395	2.44634
29.94	4.03947	2.36929	29.94	1.95353	2.62423
29.96	4.09977	2.22822	29.96	1.84471	2.21615
29.98	4.15847	2.423	29.98	1.89516	2.2191
30	4.01768	2.38112	30	1.86801	2.20006
30.02	4.04281	2.45857	30.02	1.84151	2.48051
30.04	3.91022	2.38046	30.04	1.75858	2.52109
30.06	4.017	2.32776	30.06	1.79048	2.5448
30.08	3.90628	2.32381	30.08	1.75236	2.489
30.1	3.94199	2.52932	30.1	1.86998	2.60006
30.12	3.8332	2.58731	30.12	1.81513	2.55705
30.14	3.86643	2.6022	30.14	1.8429	2.58577
30.16	3.81843	2.2209	30.16	1.76608	2.55748
30.18	3.91547	2.481	30.18	1.76968	2.55258
30.2	3.81878	2.56185	30.2	1.76289	2.60783
30.22	3.87885	2.36587	30.22	1.67696	2.6905
30.24	3.89466	2.31092	30.24	1.81865	2.46085
30.26	3.79877	2.37924	30.26	1.64907	2.41943
30.28	3.81259	2.46942	30.28	1.79486	2.49436
30.3	3.81803	2.00418	30.3	1.67456	2.35763
30.32	3.78686	2.23971	30.32	1.69106	2.52533
30.34	3.82551	2.29137	30.34	1.75053	2.49529
30.36	3.71683	2.33427	30.36	1.77666	2.14184
30.38	3.79339	2.31292	30.38	1.77012	2.55871
30.4	3.75826	2.32928	30.4	1.75411	2.47337
30.42	3.80018	2.0477	30.42	1.78397	2.31482
30.44	3.81693	2.48903	30.44	1.76057	2.18919
30.46	3.74201	2.11753	30.46	1.57743	2.7264
30.48	3.62184	2.38201	30.48	1.7272	2.50318
30.5	3.62462	2.33773	30.5	1.65187	2.38014
30.52	3.77248	2.1907	30.52	1.73858	2.56195
30.54	3.60259	2.66923	30.54	1.75835	2.3636
30.56	3.48969	2.63761	30.56	1.807	2.47032
30.58	3.74262	2.58752	30.58	1.77775	2.51748
30.6	3.63797	2.42475	30.6	1.84147	2.3031
30.62	3.5567	2.46693	30.62	1.77338	2.4734
30.64	3.44182	2.43408	30.64	1.73894	2.37891
30.66	3.46235	2.14839	30.66	1.76922	2.61809
30.68	3.50836	2.42448	30.68	1.83536	2.60014
30.7	3.45147	2.44551	30.7	1.82156	2.56445
30.72	3.50717	2.30591	30.72	1.71757	2.60425
30.74	3.53588	2.33612	30.74	1.80704	2.84581
30.76	3.46106	2.5043	30.76	1.84762	2.72731
30.78	3.47585	2.48626	30.78	1.90112	2.90164
30.8	3.47662	2.33203	30.8	1.89574	2.84263
30.82	3.68226	2.13496	30.82	1.91538	2.85437
30.84	3.7682	2.54486	30.84	1.94363	2.51905
30.86	3.78284	2.47279	30.86	1.91207	2.42259
30.88	3.72094	2.3664	30.88	1.88591	2.75618
30.9	3.85678	2.57327	30.9	1.9153	2.59619
30.92	3.85816	2.5792	30.92	1.89535	2.62121
30.94	3.83243	2.43988	30.94	1.8647	2.80034
30.96	3.9961	2.25027	30.96	1.75322	2.92981
30.98	3.97276	2.3009	30.98	1.75658	2.90645
31	3.86453	2.46469	31	1.74184	2.89532
31.02	3.98423	2.1988	31.02	1.84828	2.8299
31.04	3.89355	2.239	31.04	1.75381	2.70294
31.06	3.90705	2.34616	31.06	1.82632	2.76487
31.08	3.78226	2.49907	31.08	1.8688	2.77379
31.1	3.70867	2.42208	31.1	1.78077	2.82069
31.12	3.71696	2.55003	31.12	1.75113	2.81614
31.14	3.74343	2.41077	31.14	1.88643	2.62056
31.16	3.72296	2.44671	31.16	1.89381	2.84165
31.18	3.57738	2.20167	31.18	1.9041	2.69359
31.2	3.60383	2.37569	31.2	1.93078	2.57806
31.22	3.67084	2.0861	31.22	2.05838	2.64798
31.24	3.73849	2.33803	31.24	1.96496	2.38896
31.26	3.86455	2.11102	31.26	1.92462	2.41941
31.28	3.7374	2.46951	31.28	1.80386	2.42469
31.3	3.68411	2.35138	31.3	1.87022	2.60424
31.32	3.73332	2.45911	31.32	1.90097	2.65511
31.34	3.69906	2.46224	31.34	1.98217	2.72316
31.36	3.70274	2.48287	31.36	1.93365	2.58501
31.38	3.76744	2.27444	31.38	1.7864	2.65903
31.4	3.63658	2.06312	31.4	1.86476	2.6294
31.42	3.67983	2.19594	31.42	1.99631	2.68972
31.44	3.70575	2.45354	31.44	1.82041	2.55842
31.46	3.61705	2.48285	31.46	1.89559	2.68051
31.48	3.64214	2.10535	31.48	2.00721	2.56461
31.5	3.82917	2.50351	31.5	1.87857	2.36741
31.52	3.86881	2.35641	31.52	1.84663	2.25773
31.54	3.7982	2.00532	31.54	1.91708	2.5587
31.56	3.78942	2.18665	31.56	1.84607	2.53097
31.58	3.82821	2.31467	31.58	1.80996	2.5898
31.6	3.77536	2.36863	31.6	1.79916	2.60733
31.62	3.83573	2.28741	31.62	1.76932	2.41154
31.64	3.59905	2.15726	31.64	1.72828	2.54924
31.66	3.60009	2.06803	31.66	1.69056	2.41547
31.68	3.58099	2.56175	31.68	1.7624	2.52926
31.7	3.63314	2.19672	31.7	1.79128	2.76042
31.72	3.66078	2.49589	31.72	1.76778	2.67196
31.74	3.63416	2.38598	31.74	1.77814	2.38806
31.76	3.57807	2.40675	31.76	1.77781	2.27122
31.78	3.74381	2.15347	31.78	1.7724	2.45192
31.8	3.80077	1.96966	31.8	1.73325	2.28814
31.82	3.8205	2.3452	31.82	1.72563	2.43843
31.84	3.99889	2.09025	31.84	1.78514	2.65754
31.86	3.88688	2.19497	31.86	1.67407	2.47604
31.88	3.92887	2.16909	31.88	1.69198	2.48058
31.9	4.03787	2.20102	31.9	1.69247	2.43289
31.92	4.05242	2.55996	31.92	1.6523	2.50448
31.94	3.80778	2.15818	31.94	1.69161	2.56146
31.96	4.02821	2.49813	31.96	1.67826	2.25287
31.98	4.04336	2.52598	31.98	1.73779	2.332
32	4.02473	2.70218	32	1.78064	2.33533
32.02	3.98742	2.29242	32.02	1.74688	2.54301
32.04	4.04442	2.46615	32.04	1.77001	2.27013
32.06	4.06681	2.49488	32.06	1.71206	2.55013
32.08	3.91677	2.10412	32.08	1.64544	2.46907
32.1	3.659	2.52454	32.1	1.80451	2.30308
32.12	3.79662	2.2266	32.12	1.72763	2.20295
32.14	3.84089	2.32257	32.14	1.69329	2.33717
32.16	3.87544	2.56611	32.16	1.74802	2.68181
32.18	3.97362	2.70073	32.18	1.83026	2.46739
32.2	3.96139	2.38515	32.2	1.82222	2.6821
32.22	3.90094	2.08634	32.22	1.78275	2.74435
32.24	3.91152	2.40819	32.24	1.6389	2.4794
32.26	3.7513	2.5465	32.26	1.76276	2.17778
32.28	3.91972	2.53154	32.28	1.7995	2.49267
32.3	3.78487	2.63286	32.3	1.8208	2.30733
32.32	3.85547	2.67361	32.32	1.72816	2.5648
32.34	3.77228	2.2842	32.34	1.70748	2.70139
32.36	3.56011	2.60088	32.36	1.6707	2.76751
32.38	3.44117	2.38656	32.38	1.82111	2.76634
32.4	3.50534	2.46516	32.4	1.85689	2.53169
32.42	3.53025	2.452	32.42	1.76575	2.35777
32.44	3.54333	2.45494	32.44	1.79009	2.31806
32.46	3.61034	2.46359	32.46	1.86821	2.51553
32.48	3.85655	2.54572	32.48	1.75277	2.56536
32.5	3.83911	2.49083	32.5	1.68844	2.94928
32.52	3.92392	2.43252	32.52	1.68972	2.7142
32.54	3.83105	2.30606	32.54	1.67058	2.30077
32.56	3.88549	2.52478	32.56	1.7344	2.6023
32.58	3.7438	2.49759	32.58	1.77062	2.58389
32.6	3.80879	2.51311	32.6	1.79075	2.6748
32.62	3.70429	2.50792	32.62	1.78728	2.31943
32.64	3.83679	2.37893	32.64	1.76024	2.31391
32.66	3.71954	2.28846	32.66	1.83741	2.48459
32.68	3.70611	2.49422	32.68	1.86749	2.60159
32.7	3.70043	2.36556	32.7	1.87145	2.57664
32.72	3.59403	2.44234	32.72	1.95494	2.59299
32.74	3.41243	2.28986	32.74	1.9192	2.54083
32.76	3.38493	2.40576	32.76	1.97777	2.71779
32.78	3.45206	2.28615	32.78	1.77541	2.54296
32.8	3.39715	2.38602	32.8	1.86819	2.49225
32.82	3.31259	2.55999	32.82	1.85724	2.52436
32.84	3.23566	2.43246	32.84	1.75469	2.26936
32.86	3.25733	2.5114	32.86	1.9476	2.62838
32.88	3.2586	2.58061	32.88	1.91407	2.5884
32.9	3.24684	2.38899	32.9	1.91158	2.32173
32.92	3.37258	2.49999	32.92	1.93719	2.54494
32.94	3.27172	2.43246	32.94	2.00513	2.59746
32.96	3.33154	2.39391	32.96	1.95784	2.47509
32.98	3.32191	2.24726	32.98	1.90977	2.2404
33	3.18419	2.4788	33	1.838	2.50526
33.02	3.31368	2.5681	33.02	1.84475	2.51702
33.04	3.21137	2.59606	33.04	1.94213	2.44115
33.06	3.22833	2.51263	33.06	1.90717	2.58077
33.08	3.26563	2.4275	33.08	1.86262	2.19811
33.1	3.16013	2.50278	33.1	1.84177	2.50287
33.12	3.13864	2.51315	33.12	1.80235	2.26781
33.14	3.28537	2.55318	33.14	1.81007	2.36467
33.16	3.21095	2.2988	33.16	1.89226	2.36559
33.18	3.33325	2.64688	33.18	1.88306	2.29154
33.2	3.30238	2.28953	33.2	1.88547	2.51576
33.22	3.46081	2.33258	33.22	1.91031	2.26685
33.24	3.38293	2.33639	33.24	1.76652	2.72114
33.26	3.62612	2.30912	33.26	1.77632	2.61648
33.28	3.63287	2.49092	33.28	1.75983	2.57191
33.3	3.59032	2.43227	33.3	1.74165	2.22263
33.32	3.70938	2.29158	33.32	1.69799	2.5677
33.34	3.69869	2.48677	33.34	1.71447	2.48627
33.36	3.66922	2.4546	33.36	1.86385	2.47907
33.38	3.52171	2.39166	33.38	1.78851	2.58767
33.4	3.47341	2.24248	33.4	1.84893	2.58041
33.42	3.40386	2.1422	33.42	1.82445	2.5404
33.44	3.30849	2.03965	33.44	1.81805	2.50125
33.46	3.26895	2.52987	33.46	1.79388	2.4885
33.48	3.35982	2.58721	33.48	1.84007	2.66794
33.5	3.32973	2.39941	33.5	1.80651	2.19326
33.52	3.36297	2.00386	33.52	1.77792	2.61266
33.54	3.29742	2.45038	33.54	1.91899	2.6686
33.56	3.31601	2.36328	33.56	1.95612	2.69495
33.58	3.39911	2.27638	33.58	2.0817	2.45754
33.6	3.26476	2.3013	33.6	1.87274	2.50531
33.62	3.39609	2.40953	33.62	1.84875	2.63256
33.64	3.32286	2.17833	33.64	1.8049	2.38866
33.66	3.2619	2.25218	33.66	1.73272	2.35831
33.68	3.31659	2.40017	33.68	1.84707	2.60846
33.7	3.41817	2.42218	33.7	1.89269	2.5533
33.72	3.45767	2.47401	33.72	1.93988	2.48057
33.74	3.44136	2.52379	33.74	1.87285	2.29328
33.76	3.36781	2.19717	33.76	1.86832	2.34977
33.78	3.25597	2.5289	33.78	1.97178	2.63746
33.8	3.39015	2.64194	33.8	1.9602	2.721
33.82	3.21169	2.36523	33.82	1.70975	2.31361
33.84	3.18842	2.36746	33.84	1.79916	2.69391
33.86	3.2385	2.40364	33.86	1.74685	2.68433
33.88	3.36236	2.35747	33.88	1.78855	2.6163
33.9	3.33378	2.26518	33.9	1.76479	2.51706
33.92	3.42507	2.29357	33.92	1.68634	2.59556
33.94	3.52335	2.30187	33.94	1.74698	2.37844
33.96	3.50871	2.39837	33.96	1.90036	2.3407
33.98	3.67675	2.37243	33.98	1.77049	2.15244
34	3.61762	2.60661	34	1.62677	2.10382
34.02	3.58732	2.20407	34.02	1.68862	2.04031
34.04	3.83618	2.17963	34.04	1.59867	1.79521
34.06	3.6759	2.35825	34.06	1.68921	2.06675
34.08	3.64456	2.01484	34.08	1.80103	1.82212
34.1	3.72174	2.16799	34.1	1.67963	1.84361
34.12	3.67126	2.47089	34.12	1.65839	1.99702
34.14	3.61827	2.0459	34.14	1.71184	2.24891
34.16	3.70639	2.16452	34.16	1.71459	2.01054
34.18	3.61056	2.52262	34.18	1.73777	1.92543
34.2	3.5082	2.00087	34.2	1.62033	2.07092
34.22	3.72929	2.15989	34.22	1.65705	2.06468
34.24	3.6508	2.24727	34.24	1.55761	1.94799
34.26	3.64345	2.23778	34.26	1.62741	2.12607
34.28	3.53838	2.27797	34.28	1.58493	1.85579
34.3	3.63982	1.90809	34.3	1.71979	1.81258
34.32	3.63203	2.02524	34.32	1.78598	1.74849
34.34	3.57738	1.9733	34.34	1.76134	1.62379
34.36	3.72443	2.28049	34.36	1.7367	1.91363
34.38	3.74584	2.45084	34.38	1.68636	2.27551
34.4	3.86734	2.2953	34.4	1.7864	2.64275
34.42	3.75188	2.11757	34.42	1.68264	2.19209
34.44	3.66554	2.10615	34.44	1.76689	2.46791
34.46	3.6178	2.425	34.46	1.57482	2.60835
34.48	3.5637	2.42187	34.48	1.67715	2.83074
34.5	3.5398	2.26985	34.5	1.78695	2.7371
34.52	3.70767	2.10035	34.52	1.82128	2.45777
34.54	3.7003	2.25441	34.54	1.75701	2.25491
34.56	3.87679	2.23596	34.56	1.69268	2.67053
34.58	3.80566	2.34764	34.58	1.65816	2.52482
34.6	3.97287	2.22207	34.6	1.66086	2.6351
34.62	4.11899	2.2464	34.62	1.70021	2.48545
34.64	4.07201	2.24732	34.64	1.71653	2.36823
34.66	3.99882	2.42868	34.66	1.60954	2.48088
34.68	3.97343	2.19555	34.68	1.61396	2.61676
34.7	3.84913	2.18388	34.7	1.66994	2.59088
34.72	3.86124	2.14296	34.72	1.61343	2.58805
34.74	3.79667	2.39079	34.74	1.72338	2.38806
34.76	3.70316	2.30744	34.76	1.66211	2.36716
34.78	3.77913	2.56118	34.78	1.62227	2.49198
34.8	3.59172	2.4424	34.8	1.60521	2.64495
34.82	3.80838	1.99024	34.82	1.65143	2.58275
34.84	3.90278	2.30466	34.84	1.60392	2.3812
34.86	3.82627	2.12997	34.86	1.64203	2.62874
34.88	3.63526	1.91838	34.88	1.60706	2.77402
34.9	3.75663	2.38465	34.9	1.62355	2.50393
34.92	3.73724	2.00504	34.92	1.80012	2.26419
34.94	3.73601	2.34263	34.94	1.71752	2.44889
34.96	3.89497	2.36604	34.96	1.66577	2.67969
34.98	3.90073	2.19235	34.98	1.67593	2.57649
35	3.85961	2.33866	35	1.71294	2.66035
35.02	3.68124	2.14812	35.02	1.65661	2.4079
35.04	3.69279	2.14278	35.04	1.8223	2.22274
35.06	3.64758	2.43986	35.06	1.68696	2.40733
35.08	3.60417	2.5504	35.08	1.79335	2.30509
35.1	3.57272	2.22888	35.1	1.84296	2.6884
35.12	3.6518	2.581	35.12	1.77414	2.79216
35.14	3.47481	2.30077	35.14	1.78786	2.347
35.16	3.51178	2.29403	35.16	1.84294	2.58899
35.18	3.38041	2.2056	35.18	1.79003	2.43505
35.2	3.35156	2.29362	35.2	1.78859	2.62229
35.22	3.37401	2.58748	35.22	1.77311	2.70644
35.24	3.48034	2.00367	35.24	1.73674	2.58731
35.26	3.43782	2.11476	35.26	1.79626	2.46429
35.28	3.5307	2.2819	35.28	1.74218	2.52947
35.3	3.34576	2.24044	35.3	1.74041	2.57012
35.32	3.45221	2.32451	35.32	1.70766	2.59464
35.34	3.48221	2.47559	35.34	1.70962	2.44781
35.36	3.42691	2.28921	35.36	1.80788	2.69483
35.38	3.45033	2.24805	35.38	1.71044	2.29847
35.4	3.53151	1.86042	35.4	1.70785	2.30525
35.42	3.57044	2.21089	35.42	1.71799	2.38241
35.44	3.69137	2.06495	35.44	1.71133	2.33599
35.46	3.80823	2.18017	35.46	1.67364	2.51862
35.48	3.83643	1.91683	35.48	1.7078	2.84522
35.5	3.81962	2.5212	35.5	1.6658	2.576
35.52	3.89807	2.26077	35.52	1.78345	2.80281
35.54	3.92028	2.58928	35.54	1.77298	2.50094
35.56	3.85686	2.30381	35.56	1.72934	2.53577
35.58	3.83835	2.17339	35.58	1.78568	2.67923
35.6	3.73639	2.14718	35.6	1.64826	2.22931
35.62	3.84882	2.154	35.62	1.65803	2.38706
35.64	3.83036	2.30701	35.64	1.63443	2.43525
35.66	3.8239	2.10172	35.66	1.59466	2.52612
35.68	3.72624	2.23025	35.68	1.60102	2.31736
35.7	3.5953	2.43461	35.7	1.57836	2.67064
35.72	3.66363	2.18836	35.72	1.70863	2.75994
35.74	3.57945	2.28874	35.74	1.77491	2.55451
35.76	3.52994	2.28257	35.76	1.77534	2.48649
35.78	3.66035	2.37369	35.78	1.75043	2.75388
35.8	3.54501	2.29547	35.8	1.61829	2.2976
35.82	3.56081	2.213	35.82	1.69927	2.38717
35.84	3.51509	2.07539	35.84	1.67287	2.81463
35.86	3.63903	2.36156	35.86	1.71827	2.71253
35.88	3.61033	2.38534	35.88	1.86159	2.3718
35.9	3.64715	2.32551	35.9	1.8618	2.42059
35.92	3.50418	2.36462	35.92	1.86905	2.63205
35.94	3.50191	2.19672	35.94	1.75972	2.45242
35.96	3.53471	2.36957	35.96	1.7009	2.50654
35.98	3.35245	2.35505	35.98	1.74379	2.83523
36	3.44451	2.28719	36	1.80249	2.662
36.02	3.49584	2.01562	36.02	1.80513	2.47252
36.04	3.45393	2.24801	36.04	1.83186	2.6531
36.06	3.42949	2.07948	36.06	1.66573	2.29676
36.08	3.58144	2.26811	36.08	1.69158	2.58635
36.1	3.49535	2.3596	36.1	1.5619	2.76951
36.12	3.61775	2.35029	36.12	1.65547	2.68717
36.14	3.57924	2.58801	36.14	1.67065	2.78022
36.16	3.50387	2.39429	36.16	1.78386	2.50032
36.18	3.57349	2.49776	36.18	1.76971	2.67786
36.2	3.41352	2.42037	36.2	1.67743	2.64456
36.22	3.43884	2.41362	36.22	1.8652	2.47309
36.24	3.45068	2.59	36.24	1.83411	2.559
36.26	3.5131	2.37449	36.26	1.74724	2.66744
36.28	3.5576	2.35157	36.28	1.65697	2.55194
36.3	3.52313	2.40462	36.3	1.8563	2.66946
36.32	3.50283	2.30016	36.32	1.87759	2.624
36.34	3.52488	2.74052	36.34	1.84435	2.71189
36.36	3.48303	2.28486	36.36	1.84808	2.63508
36.38	3.49058	2.10496	36.38	1.87378	2.67694
36.4	3.68651	1.95274	36.4	1.75475	2.61405
36.42	3.66167	1.88826	36.42	1.85295	2.7125
36.44	3.69918	2.01629	36.44	1.67672	2.38789
36.46	3.63837	1.90799	36.46	1.81465	2.43173
36.48	3.68185	1.77415	36.48	1.86963	2.61749
36.5	3.71985	1.50017	36.5	1.73338	2.73208
36.52	3.7395	1.76299	36.52	1.8395	2.34371
36.54	3.73648	1.82433	36.54	1.80738	2.57515
36.56	3.56683	1.73148	36.56	1.82783	2.48223
36.58	3.64936	1.70756	36.58	1.75752	2.50842
36.6	3.63194	1.56243	36.6	1.68115	2.50583
36.62	3.67849	1.56099	36.62	1.66411	2.57442
36.64	3.70924	1.72741	36.64	1.73399	2.58745
36.66	3.74564	1.54317	36.66	1.69679	2.45054
36.68	3.68613	1.72414	36.68	1.69341	2.73615
36.7	3.63403	1.69416	36.7	1.67207	2.45484
36.72	3.67966	1.41233	36.72	1.68007	2.30804
36.74	3.70992	1.81779	36.74	1.68887	2.64955
36.76	3.80644	1.77483	36.76	1.84983	2.44046
36.78	3.77316	1.73322	36.78	1.73621	2.30876
36.8	3.73877	1.99479	36.8	1.75244	2.71224
36.82	3.78243	2.05821	36.82	1.72446	2.66787
36.84	3.74489	1.97292	36.84	1.76036	2.3182
36.86	3.75332	2.0461	36.86	1.76313	2.58092
36.88	3.79616	1.93019	36.88	1.89901	2.45169
36.9	3.83213	2.11096	36.9	1.84253	2.37124
36.92	3.85808	1.26009	36.92	1.88883	2.35368
36.94	3.8983	0.805712	36.94	1.92519	2.64223
36.96	3.89664	1.47332	36.96	1.82756	2.64853
36.98	3.84289	0.971887	36.98	1.80678	2.15677
37	3.84967	1.16567	37	1.85788	2.37596
37.02	3.80295	0.980718	37.02	1.67052	2.31589
37.04	3.83068	2.11984	37.04	1.72177	2.43034
37.06	3.85861	2.14246	37.06	1.59605	2.41639
37.08	3.872	2.15155	37.08	1.67063	2.5098
37.1	3.91896	1.39728	37.1	1.97996	2.73254
37.12	3.82835	1.53631	37.12	1.83521	2.66476
37.14	3.8469	1.29919	37.14	1.81967	2.71493
37.16	3.81861	1.07455	37.16	1.79911	2.22654
37.18	3.85033	1.42106	37.18	1.91946	2.34235
37.2	3.86075	1.11364	37.2	1.9116	2.49593
37.22	3.92875	1.17292	37.22	1.83646	2.3851
37.24	3.85978	1.2837	37.24	1.85075	2.5137
37.26	3.86627	1.07539	37.26	1.85049	2.40613
37.28	3.90301	1.49602	37.28	1.93578	2.21942
37.3	3.89849	1.62937	37.3	1.80125	2.5604
37.32	3.8061	1.0783	37.32	1.81802	2.95236
37.34	3.70879	0.941907	37.34	1.7746	2.69942
37.36	3.70215	1.13992	37.36	1.78401	2.69699
37.38	3.72477	1.06531	37.38	1.75017	2.45702
37.4	3.71448	0.953666	37.4	1.82497	2.3289
37.42	3.78871	1.43389	37.42	1.81614	2.42576
37.44	3.76086	1.25749	37.44	1.83681	2.60172
37.46	3.81994	0.97057	37.46	1.93537	2.6632
37.48	3.80006	0.837771	37.48	1.86091	2.62941
37.5	3.70563	0.96658	37.5	1.74479	2.53396
37.52	3.82872	0.76944	37.52	1.72233	2.70853
37.54	3.72194	1.09812	37.54	1.78983	2.59679
37.56	3.78164	0.722722	37.56	1.69376	2.56747
37.58	3.75135	0.964015	37.58	1.77568	2.63135
37.6	3.84648	0.536955	37.6	1.78629	2.63045
37.62	3.83383	1.41011	37.62	1.70115	2.7096
37.64	3.82106	1.11654	37.64	1.78749	2.349
37.66	3.76578	0.874765	37.66	1.87792	2.60683
37.68	3.82434	0.821967	37.68	1.89418	2.24457
37.7	3.76613	1.48424	37.7	1.74963	2.59712
37.72	3.75362	1.33682	37.72	1.73911	2.70531
37.74	3.75265	0.715907	37.74	1.79437	2.62496
37.76	3.78062	0.905905	37.76	1.88553	2.44398
37.78	3.8472	0.780204	37.78	1.89001	2.5318
37.8	3.77094	0.716058	37.8	1.91593	2.60007
37.82	3.77683	0.655882	37.82	1.8055	2.45352
37.84	3.7898	0.7962	37.84	1.68871	2.36604
37.86	3.7297	0.59933	37.86	1.8428	2.44441
37.88	3.83037	0.917859	37.88	1.79442	2.69388
37.9	3.82846	0.679638	37.9	1.84375	2.47564
37.92	3.89945	1.22351	37.92	1.83713	2.62636
37.94	3.75666	0.636092	37.94	1.78574	2.61551
37.96	3.77966	1.01989	37.96	1.79635	2.57229
37.98	3.75674	0.587008	37.98	1.73316	2.61383
38	3.67313	0.711689	38	1.75332	2.66754
38.02	3.72591	1.03238	38.02	1.72977	2.69694
38.04	3.77994	0.998692	38.04	1.68545	2.50866
38.06	3.76006	0.674961	38.06	1.71676	2.44458
38.08	3.78583	1.09243	38.08	1.76519	2.79846
38.1	3.73044	1.0533	38.1	1.71869	2.50528
38.12	3.77918	0.901948	38.12	1.63222	2.45951
38.14	3.76463	0.683394	38.14	1.83727	2.39286
38.16	3.71948	0.889952	38.16	1.79022	2.64057
38.18	3.69757	1.34181	38.18	1.86235	2.76544
38.2	3.72173	1.62731	38.2	1.80903	2.28476
38.22	3.72925	1.92556	38.22	1.84726	2.34504
38.24	3.71954	1.7609	38.24	1.91382	2.56387
38.26	3.70232	1.6163	38.26	1.85504	2.24775
38.28	3.88583	1.67061	38.28	1.77139	2.50877
38.3	3.78788	1.70889	38.3	1.83835	2.39539
38.32	3.82428	1.50112	38.32	1.81943	2.24221
38.34	3.79448	1.54954	38.34	1.8831	2.33207
38.36	3.79077	1.59941	38.36	1.93995	2.62955
38.38	3.73778	1.38693	38.38	1.70919	2.66906
38.4	3.69535	1.48932	38.4	1.76739	2.71519
38.42	3.69958	1.51786	38.42	1.75569	2.31989
38.44	3.72756	1.6705	38.44	1.76443	2.58197
38.46	3.71174	1.55464	38.46	1.82107	2.51013
38.48	3.75269	1.47746	38.48	1.91341	2.48176
38.5	3.75162	1.47224	38.5	1.84707	2.04459
38.52	3.71051	1.60659	38.52	1.86389	2.29561
38.54	3.78241	1.37406	38.54	1.89	2.4694
38.56	3.69579	1.34298	38.56	1.88819	2.67789
38.58	3.77726	1.44134	38.58	1.95769	2.36216
38.6	3.61661	1.25166	38.6	1.96406	2.3128
38.62	3.59848	0.874671	38.62	1.95585	2.22816
38.64	3.61981	1.14308	38.64	1.96446	2.252
38.66	3.71766	0.871696	38.66	1.84582	2.53835
38.68	3.61179	0.745805	38.68	1.96214	2.60164
38.7	3.70187	1.15362	38.7	1.76966	2.49395
38.72	3.75251	1.30226	38.72	1.81852	2.56165
38.74	3.63363	1.3667	38.74	1.84191	2.80074
38.76	3.67356	1.16987	38.76	1.78195	2.72239
38.78	3.6388	1.0086	38.78	1.8515	2.26547
38.8	3.61078	1.09949	38.8	1.77873	2.65597
38.82	3.67353	1.06016	38.82	1.78622	2.48273
38.84	3.73976	0.931286	38.84	1.7806	2.55949
38.86	3.66187	0.936881	38.86	1.81392	2.34469
38.88	3.71304	0.823615	38.88	1.85107	2.70723
38.9	3.71583	1.07847	38.9	1.83248	2.7012
38.92	3.67368	0.722377	38.92	1.92318	2.84667
38.94	3.70765	0.971425	38.94	1.84313	2.48403
38.96	3.65477	0.852722	38.96	1.82182	2.42955
38.98	3.68489	1.38589	38.98	1.80255	2.4498
39	3.71986	1.0256	39	1.70648	2.02684
39.02	3.62682	1.29607	39.02	1.77873	2.54748
39.04	3.64641	0.944764	39.04	1.78646	2.32292
39.06	3.77322	1.22369	39.06	1.86599	2.56217
39.08	3.76264	1.3615	39.08	1.8161	2.48226
39.1	3.70405	1.10777	39.1	1.86893	2.65705
39.12	3.69801	1.02643	39.12	1.83625	2.52011
39.14	3.71356	1.083	39.14	1.83844	2.78418
39.16	3.65913	0.595704	39.16	1.82233	2.66529
39.18	3.70822	1.14685	39.18	1.91935	2.38131
39.2	3.74464	0.54032	39.2	1.89259	2.35936
39.22	3.80968	1.1199	39.22	1.90644	2.59761
39.24	3.8476	1.26254	39.24	1.88262	2.60843
39.26	3.79211	1.4826	39.26	1.87463	2.68266
39.28	3.85166	1.58714	39.28	1.87677	2.66778
39.3	3.80594	1.67586	39.3	1.88302	2.50339
39.32	3.85537	1.83171	39.32	1.80567	2.56669
39.34	3.77335	1.83434	39.34	1.88822	2.68128
39.36	3.7239	2.28564	39.36	1.78048	2.642
39.38	3.82941	2.26799	39.38	1.79479	2.6877
39.4	3.67335	2.26392	39.4	1.94032	2.4096
39.42	3.74637	2.24143	39.42	1.87021	2.47692
39.44	3.80648	2.53402	39.44	1.85373	2.48264
39.46	3.80383	2.29118	39.46	1.8829	2.68207
39.48	3.77696	2.30283	39.48	1.85336	2.69202
39.5	3.82918	2.10832	39.5	1.80354	2.50775
39.52	3.868	2.27044	39.52	1.7431	2.43737
39.54	3.81759	2.33983	39.54	1.74748	2.61983
39.56	3.80674	2.23362	39.56	1.78573	2.26039
39.58	3.75251	2.23849	39.58	1.78874	2.52174
39.6	3.86503	2.17085	39.6	1.74391	2.75994
39.62	3.81048	2.18925	39.62	1.70359	2.81493
39.64	3.84208	2.05776	39.64	1.86185	2.53832
39.66	3.71246	2.31903	39.66	1.83814	2.50617
39.68	3.7168	2.03301	39.68	1.8188	2.4923
39.7	3.77065	2.20279	39.7	1.80402	2.56459
39.72	3.77811	2.6763	39.72	1.70931	2.57814
39.74	3.70212	2.19841	39.74	1.73831	2.35728
39.76	3.71956	2.19004	39.76	1.75262	2.57178
39.78	3.72239	2.36721	39.78	1.6377	2.54971
39.8	3.84273	2.50664	39.8	1.70337	2.20748
39.82	3.73669	2.17229	39.82	1.56927	2.59372
39.84	3.68227	2.19844	39.84	1.68789	2.45492
39.86	3.73469	2.27674	39.86	1.68803	2.29348
39.88	3.74171	2.28059	39.88	1.60548	2.53852
39.9	3.71078	2.11327	39.9	1.75832	2.49785
39.92	3.75884	2.49735	39.92	1.7302	2.33438
39.94	3.73266	2.32074	39.94	1.77541	2.43714
39.96	3.79589	2.39708	39.96	1.73537	2.24067
39.98	3.77968	2.25269	39.98	1.64115	2.49579
[truncated: 502 more rows]

## Sheet: Metformin
Time (ns)	Protein_ARG1	LIG_Metformin	Time (ns)	Protein_ARG2	LIG_Metformin
0.02	0.755538	1.10667	0.02	0.697955	0.324711
0.04	0.834761	0.946794	0.04	0.709512	0.827296
0.06	1.07195	0.803785	0.06	0.805268	0.358643
0.08	1.11019	1.33546	0.08	0.835379	1.02243
0.1	1.27958	1.22588	0.1	0.895135	1.05696
0.12	1.05603	1.29909	0.12	0.8421	0.897826
0.14	1.18821	1.34282	0.14	0.840201	1.00932
0.16	1.21849	1.20885	0.16	0.923563	1.30893
0.18	1.16064	1.21493	0.18	0.908532	1.252
0.2	1.17768	1.13021	0.2	1.03562	1.22207
0.22	1.13581	0.912359	0.22	0.981336	0.970369
0.24	1.02467	1.32469	0.24	1.01948	1.01544
0.26	1.15258	1.19753	0.26	1.01223	1.19696
0.28	1.21313	1.12675	0.28	1.01215	1.05287
0.3	1.23463	0.947186	0.3	1.01112	0.901995
0.32	1.13054	0.840602	0.32	1.02395	1.14441
0.34	1.16704	0.825618	0.34	0.989478	1.25268
0.36	1.23787	0.998646	0.36	1.11765	1.28428
0.38	1.11086	1.15666	0.38	1.08161	1.29183
0.4	1.0848	0.858359	0.4	1.11389	1.14338
0.42	1.16826	0.890383	0.42	1.0917	1.12971
0.44	1.40466	0.940544	0.44	1.01176	1.30865
0.46	1.33148	1.02247	0.46	1.10237	1.09763
0.48	1.36623	1.13612	0.48	0.957345	1.30876
0.5	1.21515	0.689452	0.5	1.10929	1.2679
0.52	1.27013	0.764241	0.52	0.998707	1.28862
0.54	1.25677	0.763725	0.54	1.00921	1.22983
0.56	1.33073	0.684703	0.56	1.09183	1.12676
0.58	1.35795	1.10036	0.58	0.966301	1.19258
0.6	1.59394	0.719323	0.6	0.975911	0.989864
0.62	1.5079	1.07694	0.62	1.05883	1.26996
0.64	1.49886	0.90941	0.64	1.00354	1.31375
0.66	1.41385	0.846419	0.66	0.935464	0.959535
0.68	1.43213	0.525822	0.68	0.949935	1.21427
0.7	1.49353	0.789088	0.7	0.988294	1.43427
0.72	1.31069	1.08572	0.72	0.96223	1.00893
0.74	1.43908	0.588182	0.74	1.01363	1.07488
0.76	1.37575	0.880083	0.76	1.05571	1.00649
0.78	1.35152	0.916564	0.78	1.00087	1.31325
0.8	1.39416	0.460515	0.8	1.01838	1.18221
0.82	1.62434	1.03244	0.82	1.02978	1.34681
0.84	1.61292	1.15186	0.84	1.01665	1.28646
0.86	1.45978	0.945115	0.86	0.960569	1.20766
0.88	1.53439	0.500831	0.88	1.08027	1.3238
0.9	1.58968	0.744399	0.9	1.01566	1.49656
0.92	1.68029	0.805019	0.92	0.936928	1.26079
0.94	1.65621	0.540851	0.94	0.950681	1.39901
0.96	1.47766	0.485547	0.96	0.955799	1.25152
0.98	1.68371	0.944	0.98	1.03488	1.18956
1	1.69969	0.923812	1	1.01829	0.987663
1.02	1.5748	0.835698	1.02	0.97624	0.929895
1.04	1.42711	0.923382	1.04	0.989383	1.26487
1.06	1.43656	0.5025	1.06	0.976688	1.10361
1.08	1.63965	0.824848	1.08	0.890134	1.16617
1.1	1.76049	0.818002	1.1	0.948509	1.36472
1.12	1.68294	0.821924	1.12	0.868272	1.55144
1.14	1.82553	0.836905	1.14	0.954952	1.21945
1.16	1.90444	0.919074	1.16	0.977738	1.50716
1.18	1.71362	0.758166	1.18	0.937526	1.06555
1.2	1.864	1.1387	1.2	0.951311	1.09232
1.22	1.95735	0.764028	1.22	1.10884	1.37134
1.24	1.91808	0.819577	1.24	1.00657	1.38969
1.26	1.61296	0.429748	1.26	1.01745	1.17295
1.28	1.93179	0.598774	1.28	1.00953	1.0294
1.3	1.89062	0.901968	1.3	1.02216	1.20417
1.32	1.76008	1.08347	1.32	0.967865	1.0163
1.34	1.56843	0.791189	1.34	0.91336	1.14718
1.36	1.69248	1.06859	1.36	0.982589	1.26772
1.38	1.68605	0.970202	1.38	1.07926	1.32911
1.4	1.539	0.497192	1.4	1.10869	1.29927
1.42	1.61659	0.444781	1.42	1.18128	1.25913
1.44	1.76592	0.892607	1.44	1.19074	1.39688
1.46	1.67987	0.974021	1.46	1.0274	1.30567
1.48	1.7659	0.788638	1.48	1.11667	1.14627
1.5	1.70377	1.03825	1.5	1.05	1.30021
1.52	1.70352	1.07241	1.52	1.07794	1.39797
1.54	1.96524	0.971972	1.54	1.10734	1.18531
1.56	2.05541	0.757766	1.56	1.05893	1.29842
1.58	2.06823	0.849268	1.58	1.09794	1.20322
1.6	1.84733	0.786482	1.6	1.11694	1.24514
1.62	1.70948	0.710547	1.62	1.11691	1.13183
1.64	1.84243	0.837255	1.64	1.12134	1.33596
1.66	1.81195	0.678296	1.66	1.03552	1.15981
1.68	1.7363	0.935147	1.68	1.03177	1.11231
1.7	1.95201	1.02593	1.7	0.981643	1.13681
1.72	2.00556	0.752973	1.72	0.971005	1.26951
1.74	1.7392	0.584468	1.74	0.951983	1.16286
1.76	1.54045	1.11054	1.76	0.976111	1.25129
1.78	1.57972	0.825726	1.78	1.03709	1.34429
1.8	1.71619	0.853007	1.8	0.96902	1.18842
1.82	1.84718	0.752427	1.82	1.09689	1.06824
1.84	2.07028	1.08643	1.84	1.05137	1.18798
1.86	1.75693	1.04091	1.86	0.962107	1.21196
1.88	1.64244	0.806355	1.88	0.955758	1.28339
1.9	1.76119	0.843596	1.9	0.980696	1.01118
1.92	1.75844	1.08513	1.92	0.97823	0.84979
1.94	2.14965	0.805922	1.94	1.05296	0.991419
1.96	1.80622	0.725461	1.96	1.06784	0.904086
1.98	1.6276	0.802848	1.98	1.08642	1.33134
2	1.5722	0.876766	2	1.15625	0.986086
2.02	1.51777	0.718863	2.02	1.18755	1.01186
2.04	1.53968	0.671291	2.04	1.1172	0.903307
2.06	1.83024	0.739981	2.06	1.19726	1.14747
2.08	1.75671	1.05614	2.08	1.19029	0.945226
2.1	1.73524	0.901396	2.1	1.09791	1.34834
2.12	1.90276	0.925574	2.12	1.18208	1.02681
2.14	1.80243	1.13336	2.14	1.241	1.1853
2.16	1.68587	0.813132	2.16	1.33525	0.907643
2.18	1.47058	0.81823	2.18	1.26209	1.01331
2.2	1.53642	0.793857	2.2	1.32715	0.984031
2.22	1.54733	0.73806	2.22	1.23223	1.05871
2.24	1.66804	0.507829	2.24	1.2582	1.23639
2.26	1.6711	0.692476	2.26	1.22344	1.03437
2.28	1.56171	0.776823	2.28	1.30684	1.05856
2.3	1.49468	0.801914	2.3	1.19632	0.825536
2.32	1.60125	0.888851	2.32	1.16572	0.904519
2.34	1.58005	0.361256	2.34	1.21194	1.17734
2.36	1.67303	0.703958	2.36	1.30901	1.05922
2.38	1.59372	0.675455	2.38	1.23856	1.21507
2.4	1.62471	0.677249	2.4	1.21607	0.706838
2.42	1.77233	0.665833	2.42	1.24725	0.904985
2.44	1.92526	0.92113	2.44	1.25634	0.947581
2.46	1.77028	0.996844	2.46	1.25475	0.912978
2.48	1.5893	0.795503	2.48	1.21954	1.20945
2.5	1.74014	0.847507	2.5	1.19125	1.07355
2.52	1.56148	1.06579	2.52	1.26677	1.10772
2.54	1.6548	0.621107	2.54	1.33286	0.882805
2.56	1.60423	0.950253	2.56	1.25441	0.823128
2.58	1.66217	0.885823	2.58	1.24233	1.25814
2.6	1.69312	0.46435	2.6	1.25302	1.07721
2.62	1.7522	0.807854	2.62	1.20808	0.780934
2.64	1.88372	0.821155	2.64	1.23896	1.0625
2.66	2.10595	0.953085	2.66	1.16779	1.14357
2.68	2.04889	1.0738	2.68	1.23499	1.08799
2.7	2.26053	0.739507	2.7	1.20495	1.27061
2.72	2.30188	0.823958	2.72	1.18889	1.05181
2.74	2.53395	0.994302	2.74	1.07054	1.31398
2.76	2.30995	1.00102	2.76	1.14496	1.1298
2.78	2.37052	0.798045	2.78	1.0971	1.06753
2.8	2.36601	1.00194	2.8	1.15056	0.922466
2.82	2.43604	1.00678	2.82	1.11881	1.28517
2.84	2.63301	0.834165	2.84	1.08008	0.988046
2.86	2.38329	0.983397	2.86	1.1009	1.07992
2.88	2.39555	0.946763	2.88	1.24842	1.2438
2.9	2.54669	0.679222	2.9	1.20734	1.15813
2.92	2.60496	1.05862	2.92	1.24967	1.18397
2.94	2.61061	0.726743	2.94	1.1496	1.32749
2.96	2.31529	0.908126	2.96	1.17708	1.30737
2.98	2.31807	0.826952	2.98	1.26163	1.1934
3	2.22275	0.993074	3	1.1747	0.941241
3.02	2.1823	1.06737	3.02	1.22956	1.22548
3.04	2.41058	0.751149	3.04	1.25263	0.852594
3.06	2.52422	0.798419	3.06	1.17942	0.933091
3.08	2.39992	1.07896	3.08	1.15392	1.30183
3.1	2.29985	0.72458	3.1	1.14484	1.15104
3.12	2.20069	0.494741	3.12	1.26751	1.21651
3.14	2.18435	0.79386	3.14	1.20349	1.0175
3.16	2.36317	1.02127	3.16	1.17754	1.33323
3.18	2.41237	1.06485	3.18	1.36768	1.33551
3.2	2.54931	0.881522	3.2	1.30064	1.37052
3.22	2.42625	1.04644	3.22	1.24344	1.05975
3.24	2.36304	1.1298	3.24	1.29161	0.964878
3.26	2.17798	1.06561	3.26	1.23761	1.33089
3.28	2.15573	1.07298	3.28	1.28069	1.25995
3.3	2.35424	1.11324	3.3	1.22903	1.03168
3.32	2.38738	1.04615	3.32	1.23457	1.08747
3.34	2.54542	0.756324	3.34	1.36208	1.16438
3.36	2.75717	1.00444	3.36	1.28337	1.26585
3.38	2.99856	1.08801	3.38	1.29555	1.0143
3.4	2.81327	0.688533	3.4	1.39484	1.28424
3.42	2.76321	0.931942	3.42	1.43609	0.923668
3.44	2.82751	0.579965	3.44	1.30606	1.01184
3.46	2.62608	0.54889	3.46	1.33279	0.925387
3.48	2.62097	0.897439	3.48	1.37555	1.04761
3.5	2.48046	0.779155	3.5	1.33805	0.934732
3.52	2.58361	0.805614	3.52	1.27806	1.35494
3.54	2.54973	0.666048	3.54	1.32415	1.10805
3.56	2.37653	0.953673	3.56	1.23753	1.3541
3.58	2.56402	0.535756	3.58	1.28636	1.21145
3.6	2.59649	0.849239	3.6	1.29598	1.50682
3.62	2.57126	0.579771	3.62	1.23579	1.29618
3.64	2.38256	0.748054	3.64	1.26331	1.42315
3.66	2.55111	0.851118	3.66	1.20705	1.34247
3.68	2.61158	0.854099	3.68	1.25115	1.46946
3.7	2.51436	0.90495	3.7	1.20878	1.62392
3.72	2.55279	0.842752	3.72	1.25574	1.32955
3.74	2.46621	0.689816	3.74	1.25038	1.24536
3.76	2.30149	0.875148	3.76	1.30112	1.06386
3.78	2.29195	0.750493	3.78	1.32976	0.984773
3.8	2.2505	0.786132	3.8	1.29123	1.10182
3.82	2.20497	0.807569	3.82	1.29587	1.53861
3.84	2.36568	0.8001	3.84	1.20336	1.33685
3.86	2.44986	0.758991	3.86	1.26967	1.36778
3.88	2.31725	1.01514	3.88	1.30621	1.52139
3.9	2.12374	0.660965	3.9	1.28555	1.22748
3.92	2.31502	0.824978	3.92	1.30534	0.862166
3.94	2.14271	0.994148	3.94	1.21752	1.06333
3.96	2.20064	0.886164	3.96	1.25982	0.969209
3.98	2.10363	1.01958	3.98	1.12396	1.15582
4	2.05996	0.945445	4	1.20468	1.10677
4.02	1.89783	0.692402	4.02	1.36677	1.05017
4.04	1.76543	0.893782	4.04	1.25485	0.925049
4.06	1.88472	0.796128	4.06	1.22534	1.19136
4.08	1.79923	0.850518	4.08	1.15448	1.20864
4.1	1.8547	1.06638	4.1	1.118	1.0919
4.12	1.84164	0.747012	4.12	1.09202	1.07915
4.14	1.84902	0.822407	4.14	1.20396	1.15008
4.16	1.78294	1.0062	4.16	1.16983	1.10105
4.18	1.53823	0.804634	4.18	1.14938	1.49444
4.2	1.58945	0.499171	4.2	1.31122	1.3515
4.22	1.65025	0.723351	4.22	1.27815	1.37351
4.24	1.70592	0.712893	4.24	1.22257	1.43962
4.26	1.52067	0.7985	4.26	1.36534	1.44064
4.28	1.65721	0.903151	4.28	1.20091	1.42578
4.3	1.68605	0.873334	4.3	1.24288	1.55277
4.32	1.62691	0.714317	4.32	1.18361	1.58334
4.34	1.64852	0.863028	4.34	1.25918	1.48132
4.36	1.7788	0.75041	4.36	1.17973	1.35401
4.38	1.98596	0.928496	4.38	1.22381	0.822156
4.4	2.04023	0.747194	4.4	1.2505	0.985575
4.42	1.92946	0.962492	4.42	1.26045	0.975304
4.44	1.83701	1.05235	4.44	1.09268	0.839953
4.46	1.60191	0.956896	4.46	1.13161	1.18771
4.48	1.67165	1.04434	4.48	1.24981	1.22352
4.5	1.71366	0.714288	4.5	1.19984	1.31701
4.52	1.53389	0.910949	4.52	1.23114	1.35792
4.54	1.57759	0.471575	4.54	1.22503	1.43899
4.56	1.43765	0.78945	4.56	1.21791	1.53698
4.58	1.49959	0.439213	4.58	1.17879	1.29446
4.6	1.514	0.758552	4.6	1.37096	1.41885
4.62	1.68828	1.0479	4.62	1.35187	1.38407
4.64	1.49795	0.833039	4.64	1.29647	1.34629
4.66	1.575	0.514537	4.66	1.38371	1.66122
4.68	1.51477	0.744467	4.68	1.29344	1.22633
4.7	1.37951	0.810287	4.7	1.2428	1.25302
4.72	1.48287	1.01335	4.72	1.27668	1.12354
4.74	1.30505	0.894261	4.74	1.22641	1.61074
4.76	1.39501	0.998385	4.76	1.14695	1.37834
4.78	1.53417	0.938403	4.78	1.26909	1.0561
4.8	1.58354	0.750302	4.8	1.1908	1.24751
4.82	1.48411	0.849268	4.82	1.28982	0.952256
4.84	1.55146	0.911397	4.84	1.23935	1.18981
4.86	1.54192	1.01372	4.86	1.30333	1.46768
4.88	1.58187	1.05749	4.88	1.27429	1.43514
4.9	1.60883	0.765276	4.9	1.23082	1.08442
4.92	1.71846	1.06942	4.92	1.13868	1.12515
4.94	1.63152	0.992103	4.94	1.22221	1.49286
4.96	1.83599	0.827648	4.96	1.29942	1.40555
4.98	1.88213	1.1283	4.98	1.19256	1.2879
5	1.96434	1.06864	5	1.20208	1.13222
5.02	1.94652	1.08311	5.02	1.20659	1.22936
5.04	2.06963	0.840575	5.04	1.19507	1.32943
5.06	2.10023	0.841354	5.06	1.27698	1.47728
5.08	2.14846	0.541373	5.08	1.26136	1.44715
5.1	2.21465	0.890868	5.1	1.41065	1.21484
5.12	2.15064	0.846512	5.12	1.3419	1.13116
5.14	2.0598	1.01026	5.14	1.27512	1.1069
5.16	2.06505	1.02181	5.16	1.42747	1.0654
5.18	2.02405	0.661171	5.18	1.23507	0.811534
5.2	2.10276	0.84297	5.2	1.34284	0.750608
5.22	2.05492	0.75022	5.22	1.22557	0.97634
5.24	2.09347	0.949219	5.24	1.30389	1.43954
5.26	2.15054	0.958138	5.26	1.15477	1.50572
5.28	1.94181	0.988244	5.28	1.18829	1.32181
5.3	2.08878	1.00004	5.3	1.28425	1.54591
5.32	2.04934	0.676822	5.32	1.23787	1.37669
5.34	1.90268	0.865314	5.34	1.27139	1.39325
5.36	2.01972	0.827734	5.36	1.24608	1.23655
5.38	2.1105	0.558323	5.38	1.22604	1.17144
5.4	2.09248	1.09859	5.4	1.36708	1.48833
5.42	2.30876	1.09435	5.42	1.31843	1.26624
5.44	2.36824	0.843585	5.44	1.31931	1.23532
5.46	2.19884	0.990604	5.46	1.3128	1.43154
5.48	2.32412	1.09814	5.48	1.32322	1.35723
5.5	2.25298	0.825975	5.5	1.33402	1.11999
5.52	2.36051	0.996005	5.52	1.37261	1.4508
5.54	2.50685	0.89877	5.54	1.40435	1.25299
5.56	2.69136	1.0794	5.56	1.33129	0.912754
5.58	2.65556	0.914946	5.58	1.31045	1.1311
5.6	2.5415	0.488443	5.6	1.28603	1.14926
5.62	2.64511	0.802762	5.62	1.25292	1.13359
5.64	2.58663	0.429422	5.64	1.35858	1.05378
5.66	2.422	0.768299	5.66	1.46056	0.964693
5.68	2.59111	0.45748	5.68	1.4222	1.2166
5.7	2.74772	0.984757	5.7	1.48994	1.41545
5.72	2.80659	0.989489	5.72	1.3479	1.33223
5.74	2.82802	1.04929	5.74	1.25882	1.24602
5.76	3.12523	0.960459	5.76	1.35352	1.037
5.78	3.07525	0.903432	5.78	1.35058	1.27269
5.8	3.07291	0.688522	5.8	1.26305	1.19395
5.82	3.19393	0.665441	5.82	1.28045	1.08461
5.84	3.21187	1.06408	5.84	1.25502	1.23391
5.86	3.1824	0.755301	5.86	1.19093	1.2705
5.88	3.1403	1.06442	5.88	1.17464	1.16224
5.9	3.11102	0.927274	5.9	1.22585	1.17248
5.92	3.03312	0.780303	5.92	1.23261	1.15785
5.94	2.96628	0.871861	5.94	1.1327	1.06099
5.96	3.38004	0.908144	5.96	1.23245	1.02145
5.98	3.28847	1.03543	5.98	1.2832	1.03785
6	3.19603	1.00736	6	1.18096	1.17951
6.02	3.27539	1.04881	6.02	1.23363	1.25754
6.04	3.42665	1.04204	6.04	1.18797	1.1313
6.06	3.36368	0.766977	6.06	1.44404	0.993805
6.08	3.41822	0.985885	6.08	1.34508	1.21982
6.1	3.36273	0.783748	6.1	1.2645	1.0263
6.12	3.30019	0.648563	6.12	1.25283	1.30351
6.14	3.46921	0.841374	6.14	1.32076	1.20221
6.16	3.79957	0.572492	6.16	1.27723	1.33433
6.18	3.71298	0.92909	6.18	1.23166	1.28197
6.2	3.62245	0.820376	6.2	1.38977	1.14944
6.22	3.58586	0.798852	6.22	1.36884	0.910612
6.24	3.47167	0.613886	6.24	1.2982	1.27485
6.26	3.2908	0.941757	6.26	1.2758	0.998058
6.28	3.05809	0.914532	6.28	1.29167	1.07307
6.3	3.19063	0.81865	6.3	1.21905	1.11853
6.32	3.19883	0.708497	6.32	1.25244	1.12628
6.34	2.99649	0.727696	6.34	1.30756	1.40395
6.36	2.89128	0.545461	6.36	1.30764	1.26682
6.38	2.97638	0.807098	6.38	1.31292	1.15065
6.4	3.04309	0.420372	6.4	1.18844	1.13274
6.42	3.10302	1.12633	6.42	1.253	1.20314
6.44	3.15979	1.10205	6.44	1.27548	1.25151
6.46	3.33974	0.818504	6.46	1.21312	1.18339
6.48	3.44789	1.04721	6.48	1.22991	0.943871
6.5	3.3686	1.11316	6.5	1.18059	1.28146
6.52	3.16226	1.0912	6.52	1.25926	1.12493
6.54	3.00165	1.05192	6.54	1.21014	1.21326
6.56	3.08922	0.96386	6.56	1.24541	1.01206
6.58	3.16372	0.606683	6.58	1.21916	1.13296
6.6	3.03287	0.902222	6.6	1.21393	1.1162
6.62	3.47937	1.00965	6.62	1.25234	1.11024
6.64	3.28576	0.734809	6.64	1.26764	1.44875
6.66	3.29589	0.972066	6.66	1.24098	0.991041
6.68	3.23191	1.00061	6.68	1.18959	1.19345
6.7	3.13516	0.774158	6.7	1.14553	1.07286
6.72	3.1287	0.866377	6.72	1.13127	1.05673
6.74	2.97742	1.06984	6.74	1.11402	1.14117
6.76	2.86533	1.11116	6.76	1.14339	1.18068
6.78	2.88702	0.937728	6.78	1.18218	1.13076
6.8	2.93307	0.931191	6.8	1.1677	1.12301
6.82	2.71589	1.08156	6.82	1.21721	0.969146
6.84	2.81609	0.923487	6.84	1.16399	0.985128
6.86	2.71781	1.05046	6.86	1.1743	1.33888
6.88	2.937	1.08193	6.88	1.13096	1.12655
6.9	2.56836	0.908747	6.9	1.23508	1.03337
6.92	2.76876	1.07628	6.92	1.22681	1.26645
6.94	2.47421	0.737649	6.94	1.2773	1.10542
6.96	2.34837	0.547319	6.96	1.25382	1.18308
6.98	2.35315	0.944336	6.98	1.27041	1.24501
7	2.39202	0.867275	7	1.20889	0.941893
7.02	2.42007	0.952465	7.02	1.22547	0.987369
7.04	2.28657	1.04939	7.04	1.13707	1.09378
7.06	2.34983	1.11966	7.06	1.12681	1.10103
7.08	2.41241	1.00701	7.08	1.1752	1.34001
7.1	2.57844	0.492083	7.1	1.16132	1.30828
7.12	2.46971	0.565181	7.12	1.25506	0.722974
7.14	2.5524	0.694705	7.14	1.12558	1.1095
7.16	2.63536	0.876616	7.16	1.16018	1.02736
7.18	2.95351	0.67739	7.18	1.26569	1.25209
7.2	2.76504	0.540326	7.2	1.19355	1.31504
7.22	3.05046	0.710761	7.22	1.09176	1.1788
7.24	3.1309	0.855201	7.24	1.07632	1.23459
7.26	3.04413	0.961183	7.26	1.11895	1.16545
7.28	2.9542	0.937826	7.28	1.24952	1.01778
7.3	3.12755	1.17849	7.3	1.16028	1.31751
7.32	3.08751	0.717103	7.32	1.23611	1.16385
7.34	3.2513	1.03969	7.34	1.23543	1.1381
7.36	3.05927	0.63614	7.36	1.1592	1.07036
7.38	3.08118	0.934195	7.38	1.1736	1.05963
7.4	3.0908	0.784958	7.4	1.12491	1.27737
7.42	2.93367	1.04023	7.42	1.23747	1.18086
7.44	2.8119	0.852167	7.44	1.17174	1.226
7.46	3.02579	0.938915	7.46	1.13299	1.13432
7.48	3.07628	0.562047	7.48	1.18677	1.05023
7.5	3.15571	1.05447	7.5	1.20502	1.13595
7.52	3.35708	1.08649	7.52	1.15086	1.2276
7.54	3.17489	1.00169	7.54	1.13122	1.12014
7.56	3.02463	1.04223	7.56	1.11673	1.36399
7.58	3.08081	1.09555	7.58	1.15709	1.05257
7.6	3.0912	0.944591	7.6	1.11114	0.880096
7.62	3.10587	0.972257	7.62	1.17194	1.00725
7.64	3.04976	0.602524	7.64	1.18302	1.10706
7.66	3.22919	0.769417	7.66	1.19886	1.27576
7.68	3.15289	1.11238	7.68	1.14152	1.14178
7.7	3.26634	0.898623	7.7	1.10267	1.32856
7.72	3.29663	0.584249	7.72	1.22208	1.40671
7.74	3.3157	0.948911	7.74	1.21527	1.17699
7.76	3.20168	0.845139	7.76	1.15811	1.1914
7.78	3.21358	0.968328	7.78	1.21834	1.22379
7.8	3.39028	0.915718	7.8	1.25475	1.11052
7.82	3.25503	0.981736	7.82	1.24366	1.20247
7.84	3.29922	0.847341	7.84	1.19374	1.35503
7.86	3.27299	1.12059	7.86	1.19067	1.07852
7.88	3.41927	1.10531	7.88	1.17795	1.21418
7.9	3.51679	0.900231	7.9	1.16783	1.02033
7.92	3.49587	0.919548	7.92	1.15825	1.07913
7.94	3.83209	0.787177	7.94	1.11842	1.00053
7.96	3.69465	0.642051	7.96	1.06651	1.27098
7.98	3.74388	1.10943	7.98	1.17594	1.04773
8	3.56122	0.966239	8	1.16407	1.07783
8.02	3.59842	0.766328	8.02	1.23665	1.23777
8.04	3.78565	0.747523	8.04	1.1749	1.29073
8.06	3.84636	1.03117	8.06	1.19452	1.19235
8.08	3.83901	0.893536	8.08	1.06899	1.12809
8.1	3.65623	1.06835	8.1	1.17475	1.21347
8.12	3.63696	0.766279	8.12	1.08262	0.94938
8.14	3.53065	0.55773	8.14	1.20408	1.08535
8.16	3.39352	0.657931	8.16	1.11432	1.28186
8.18	3.44676	1.20005	8.18	1.11026	1.07539
8.2	3.2433	0.66759	8.2	1.07664	0.907543
8.22	3.1486	0.801627	8.22	1.07385	1.12734
8.24	3.03564	0.416166	8.24	1.07676	1.08151
8.26	2.85675	0.824023	8.26	1.04565	1.12547
8.28	2.84043	0.92507	8.28	1.11543	0.838776
8.3	3.10371	1.19563	8.3	1.05892	0.8826
8.32	2.97916	0.989697	8.32	1.19827	1.35171
8.34	3.23431	0.993333	8.34	1.10707	1.07281
8.36	3.23999	0.856625	8.36	1.12625	1.2068
8.38	3.25725	0.856732	8.38	1.07265	1.2948
8.4	3.29616	0.956689	8.4	1.11113	1.15919
8.42	3.39799	0.711359	8.42	1.21039	1.40182
8.44	3.579	0.804129	8.44	1.20674	1.03336
8.46	3.6867	0.896599	8.46	1.10684	1.37321
8.48	3.73982	0.882792	8.48	1.14398	1.29251
8.5	3.68814	0.920414	8.5	1.12376	1.18989
8.52	3.79439	0.809179	8.52	1.08737	1.03089
8.54	3.74888	1.05283	8.54	1.17459	1.101
8.56	3.60146	0.641948	8.56	1.17045	1.11691
8.58	3.53165	1.01297	8.58	1.23843	1.1273
8.6	3.69091	0.714747	8.6	1.21008	0.951753
8.62	3.84837	0.960899	8.62	1.05961	1.30055
8.64	3.81404	0.606762	8.64	1.15818	1.23854
8.66	3.58328	0.933881	8.66	1.11764	1.09914
8.68	3.27074	0.936671	8.68	1.22597	0.957523
8.7	3.33587	0.998547	8.7	1.09186	1.02694
8.72	3.54364	1.0024	8.72	1.08991	0.950656
8.74	3.55534	0.698235	8.74	1.15776	1.29308
8.76	3.38329	0.675459	8.76	1.11966	1.15797
8.78	3.10704	1.00273	8.78	1.12384	0.998991
8.8	3.41182	0.702108	8.8	1.06666	1.15495
8.82	3.23527	1.04371	8.82	1.16394	1.39485
8.84	3.35277	0.992292	8.84	1.175	1.404
8.86	3.35723	0.7818	8.86	1.1338	1.35078
8.88	3.41154	1.09437	8.88	1.07647	1.25082
8.9	3.3029	0.733221	8.9	1.11825	1.03911
8.92	3.15647	0.563011	8.92	1.17105	1.30755
8.94	3.0968	0.387951	8.94	1.11914	1.11295
8.96	3.07964	0.474502	8.96	1.01706	1.14487
8.98	3.15181	0.799247	8.98	1.11933	0.997387
9	3.32133	0.738558	9	1.12362	1.1795
9.02	3.24748	1.09434	9.02	1.20315	1.21508
9.04	3.28799	0.948224	9.04	1.16129	1.2073
9.06	3.16023	0.620123	9.06	1.21286	1.29569
9.08	3.18587	1.01222	9.08	1.05868	1.02344
9.1	3.21429	0.786717	9.1	1.07012	1.12537
9.12	3.41848	0.919169	9.12	1.09325	1.30733
9.14	3.29005	0.864607	9.14	1.18122	1.25382
9.16	3.31715	0.805219	9.16	1.06296	1.32658
9.18	3.53555	0.419492	9.18	1.10089	1.24546
9.2	3.76602	0.397804	9.2	1.108	1.15631
9.22	3.60085	0.747768	9.22	1.2178	1.12245
9.24	3.6949	1.01036	9.24	1.10894	1.07547
9.26	3.74943	0.862198	9.26	1.08092	1.41639
9.28	4.03942	1.14739	9.28	1.15547	1.40663
9.3	4.07976	1.02993	9.3	1.09582	1.14409
9.32	3.97907	1.0516	9.32	1.06839	1.18854
9.34	3.99746	0.618735	9.34	1.07358	1.10649
9.36	4.05354	0.895471	9.36	1.13429	1.41875
9.38	3.9156	0.703939	9.38	1.18283	1.43159
9.4	3.96225	0.700889	9.4	1.18245	1.26317
9.42	3.86453	0.840482	9.42	1.21461	1.12677
9.44	3.74383	0.866476	9.44	1.28866	1.31814
9.46	3.72321	0.817151	9.46	1.12514	1.06841
9.48	3.70045	0.806081	9.48	1.12136	1.27823
9.5	3.61779	0.843034	9.5	1.15515	1.18945
9.52	3.54821	0.807293	9.52	1.14984	1.21536
9.54	3.72438	0.722533	9.54	1.17828	1.16956
9.56	3.71623	0.478416	9.56	1.13498	1.13523
9.58	3.68408	1.08348	9.58	1.10547	1.13563
9.6	3.68433	0.903741	9.6	1.08906	1.36308
9.62	3.56028	1.11008	9.62	1.11133	1.1102
9.64	3.71294	0.875726	9.64	1.27003	1.20123
9.66	3.76002	1.122	9.66	1.06542	0.991911
9.68	3.7764	1.11575	9.68	1.05	0.981393
9.7	3.79201	0.854964	9.7	1.14306	1.13257
9.72	3.65906	0.811957	9.72	1.14751	1.33155
9.74	3.49449	0.833886	9.74	1.19364	1.09994
9.76	3.64627	0.730257	9.76	1.28783	1.16038
9.78	3.53947	0.860436	9.78	1.05901	1.29487
9.8	3.57784	1.05533	9.8	1.15156	1.45404
9.82	3.60888	1.004	9.82	1.07956	1.19726
9.84	3.23541	0.78627	9.84	1.17092	1.23839
9.86	3.4074	1.0519	9.86	1.23035	1.0545
9.88	3.69249	0.719234	9.88	1.11316	1.48351
9.9	3.56198	1.0133	9.9	1.16295	1.21344
9.92	3.64535	1.02306	9.92	1.26219	1.20378
9.94	3.7377	1.10079	9.94	1.21583	0.939552
9.96	3.69899	0.583208	9.96	1.2448	1.14791
9.98	3.90925	0.55857	9.98	1.1412	1.36606
10	3.65395	0.901458	10	1.2487	1.27794
10.02	3.86337	0.866471	10.02	1.14601	1.31382
10.04	3.76391	1.16919	10.04	1.09099	1.23634
10.06	3.74675	1.10196	10.06	1.1501	1.04566
10.08	3.77815	0.484998	10.08	1.15223	1.0361
10.1	3.80743	1.00326	10.1	1.13352	1.41049
10.12	3.98287	0.96186	10.12	1.16135	1.34737
10.14	4.13433	0.693201	10.14	1.14542	1.13661
10.16	4.2593	0.70575	10.16	1.18244	1.39334
10.18	4.44512	0.919021	10.18	1.12019	1.29894
10.2	4.2689	1.0689	10.2	1.1206	1.21315
10.22	4.14583	1.09977	10.22	1.18548	1.29674
10.24	4.15014	0.818702	10.24	1.20766	1.13676
10.26	4.06152	0.962228	10.26	1.0721	0.931379
10.28	4.16205	0.967944	10.28	1.16493	1.23278
10.3	4.32361	0.773761	10.3	1.12236	1.23486
10.32	4.01707	0.456401	10.32	1.12796	1.35218
10.34	4.01397	0.757438	10.34	1.2154	1.30741
10.36	4.10903	0.727128	10.36	1.11029	1.10224
10.38	4.12505	1.02997	10.38	1.13947	1.2934
10.4	4.04365	0.786966	10.4	1.25064	1.41987
10.42	3.76167	0.870017	10.42	1.19049	1.09975
10.44	3.54347	0.559934	10.44	1.19225	1.10349
10.46	3.48414	0.757848	10.46	1.15628	1.16328
10.48	3.43131	1.02342	10.48	1.16208	1.34059
10.5	3.4217	0.869373	10.5	1.12274	0.959424
10.52	3.22718	0.972123	10.52	1.13677	1.20301
10.54	3.20348	0.830806	10.54	1.11732	1.18724
10.56	3.06375	0.539237	10.56	1.07347	1.28743
10.58	3.22568	0.846401	10.58	1.05074	1.39883
10.6	3.14587	1.05562	10.6	1.13387	1.1951
10.62	3.05772	0.776278	10.62	1.10663	1.43601
10.64	3.12608	0.586511	10.64	1.19119	1.09902
10.66	3.27949	0.852436	10.66	1.19841	1.32448
10.68	3.05597	0.83599	10.68	1.24355	1.26116
10.7	3.07358	0.678133	10.7	1.14835	1.15377
10.72	2.90606	0.875349	10.72	1.09913	1.21103
10.74	2.93175	0.885012	10.74	1.15238	1.15522
10.76	2.73545	0.78546	10.76	1.19611	1.399
10.78	2.82514	0.476269	10.78	1.13945	1.31645
10.8	2.55077	0.860156	10.8	1.16802	1.36917
10.82	2.57481	0.961987	10.82	1.14124	0.940143
10.84	2.51453	0.838191	10.84	1.17252	1.37486
10.86	2.60853	1.07824	10.86	1.15635	1.2683
10.88	2.54002	0.859329	10.88	1.20022	1.16399
10.9	2.68654	0.990894	10.9	1.18776	1.21596
10.92	2.68976	0.985455	10.92	0.998776	1.33013
10.94	2.51669	1.13537	10.94	1.03729	1.33466
10.96	2.63605	1.03224	10.96	1.1304	1.27947
10.98	2.69522	1.01902	10.98	1.09064	1.44231
11	2.99856	1.08251	11	1.09443	1.1514
11.02	3.22744	0.843023	11.02	1.05443	1.35832
11.04	3.30742	1.08663	11.04	1.08345	1.12277
11.06	3.38533	0.998105	11.06	1.07822	1.1681
11.08	3.05504	0.840633	11.08	1.14468	1.27512
11.1	3.02857	1.11155	11.1	1.11239	1.27463
11.12	2.91038	0.61591	11.12	1.18289	1.38368
11.14	2.94342	0.380264	11.14	1.19994	1.43426
11.16	2.90327	0.488013	11.16	1.22173	1.33351
11.18	2.80432	0.96092	11.18	1.22338	1.00247
11.2	2.82523	0.862685	11.2	1.26814	1.26481
11.22	2.85628	0.882565	11.22	1.18539	1.0948
11.24	2.81146	0.761631	11.24	1.13275	1.20559
11.26	2.79781	1.14297	11.26	1.24401	1.25833
11.28	2.78306	0.815119	11.28	1.1326	1.40575
11.3	2.71979	1.13213	11.3	1.23071	1.30902
11.32	2.93017	0.935331	11.32	1.19933	1.25963
11.34	2.83762	1.09374	11.34	1.31783	1.06037
11.36	2.90426	0.860088	11.36	1.24194	1.14432
11.38	2.86045	0.879796	11.38	1.25456	1.08248
11.4	2.87805	0.736884	11.4	1.18925	0.96847
11.42	2.77529	0.455553	11.42	1.17992	1.09709
11.44	2.76075	0.601812	11.44	1.21262	1.15591
11.46	2.68549	1.02731	11.46	1.07258	1.21589
11.48	2.35024	0.8847	11.48	1.14735	1.28635
11.5	2.50622	0.911784	11.5	1.14683	1.36292
11.52	2.25636	0.925488	11.52	1.10563	1.14447
11.54	2.23119	0.691788	11.54	1.14071	1.04562
11.56	2.09088	0.831588	11.56	1.16917	1.13613
11.58	2.45678	0.655901	11.58	1.23389	1.27818
11.6	2.28444	1.05309	11.6	1.16368	0.980939
11.62	2.29915	0.897936	11.62	1.15846	0.945818
11.64	2.35147	1.08869	11.64	1.21626	1.09342
11.66	2.45054	1.01576	11.66	1.18743	1.15693
11.68	2.3203	1.04675	11.68	1.22284	1.16029
11.7	2.19273	0.830995	11.7	1.11627	1.28515
11.72	2.24813	0.79113	11.72	1.17999	0.978127
11.74	2.07869	0.713863	11.74	1.26423	1.04083
11.76	2.04588	0.618029	11.76	1.15495	1.22729
11.78	1.91962	0.797191	11.78	1.26852	1.22976
11.8	1.86895	1.11039	11.8	1.3244	1.26756
11.82	1.94186	0.873361	11.82	1.198	1.15182
11.84	1.96016	0.946672	11.84	1.25538	1.00212
11.86	1.91589	0.728444	11.86	1.12598	1.19117
11.88	1.93595	0.867337	11.88	1.19315	1.19354
11.9	1.98807	0.931491	11.9	1.1758	1.00683
11.92	2.06843	0.940451	11.92	1.26996	1.20985
11.94	1.95328	1.15018	11.94	1.2608	1.27001
11.96	1.9794	0.888829	11.96	1.24207	1.3625
11.98	2.09253	1.06848	11.98	1.14954	1.08809
12	2.11188	1.14532	12	1.20913	1.17291
12.02	2.16211	0.863468	12.02	1.13157	1.03819
12.04	2.07016	0.804612	12.04	1.16524	1.17819
12.06	1.94421	0.787628	12.06	1.15331	1.12098
12.08	1.89295	0.915494	12.08	1.16025	1.25784
12.1	1.97922	0.765218	12.1	1.17641	1.17417
12.12	2.02492	1.12984	12.12	1.18199	1.24469
12.14	2.1743	0.909341	12.14	1.19799	0.936395
12.16	2.17447	1.06928	12.16	1.20844	1.26216
12.18	2.19543	0.952926	12.18	1.17311	1.07315
12.2	2.15623	0.887511	12.2	1.15914	1.02114
12.22	2.11028	0.759872	12.22	1.18296	1.17044
12.24	2.1743	0.92044	12.24	1.17305	1.40867
12.26	2.35466	1.0354	12.26	1.26171	1.22322
12.28	2.26115	0.926294	12.28	1.29183	1.35839
12.3	2.31229	0.885635	12.3	1.19416	1.4206
12.32	2.14366	1.07466	12.32	1.19671	1.23181
12.34	2.24644	1.05814	12.34	1.22619	1.1632
12.36	2.35151	1.0186	12.36	1.22125	1.13452
12.38	2.28318	0.674015	12.38	1.16144	1.28005
12.4	2.34807	0.838257	12.4	1.15496	1.21014
12.42	2.62731	0.785052	12.42	1.29288	1.22207
12.44	2.53086	0.968186	12.44	1.17013	1.18972
12.46	2.55202	0.674696	12.46	1.21229	1.25975
12.48	2.60166	0.787692	12.48	1.16546	1.27284
12.5	2.56126	0.871826	12.5	1.19314	1.07458
12.52	2.53463	1.10623	12.52	1.13551	1.12145
12.54	2.58924	0.978433	12.54	1.19465	1.10205
12.56	2.50508	0.660705	12.56	1.2276	1.34489
12.58	2.46681	0.817537	12.58	1.19241	1.26427
12.6	2.31519	0.804861	12.6	1.20197	1.38016
12.62	2.43185	0.995228	12.62	1.22233	1.27669
12.64	2.35668	0.72418	12.64	1.23661	1.01086
12.66	2.29506	0.903145	12.66	1.17707	1.20327
12.68	2.18178	0.707188	12.68	1.24218	1.17418
12.7	2.13689	0.855254	12.7	1.26429	0.984208
12.72	2.21413	0.979485	12.72	1.25558	1.0948
12.74	2.20915	0.807294	12.74	1.18204	1.05338
12.76	2.19715	0.886298	12.76	1.22531	1.33218
12.78	2.39105	1.13141	12.78	1.25241	1.05599
12.8	2.55986	1.08087	12.8	1.28655	1.36885
12.82	2.57824	0.921362	12.82	1.17301	1.30564
12.84	2.57295	0.88501	12.84	1.20485	1.28644
12.86	2.84602	0.874432	12.86	1.21487	1.19603
12.88	2.65547	0.871876	12.88	1.28057	1.27347
12.9	2.60285	1.01724	12.9	1.20823	1.16949
12.92	2.57989	1.05087	12.92	1.21332	1.17158
12.94	2.52874	1.05446	12.94	1.16613	1.16992
12.96	2.53775	1.04731	12.96	1.22097	1.33294
12.98	2.35725	0.673161	12.98	1.24102	1.22742
13	2.43087	1.06529	13	1.18312	1.38669
13.02	2.37799	0.788606	13.02	1.15729	1.15534
13.04	2.43176	0.86193	13.04	1.15475	1.29023
13.06	2.46039	0.941387	13.06	1.2255	1.00577
13.08	2.56794	0.888792	13.08	1.21219	1.4046
13.1	2.60259	1.10113	13.1	1.19032	1.1721
13.12	2.37274	1.01259	13.12	1.16601	1.28501
13.14	2.4171	0.964628	13.14	1.17029	1.23843
13.16	2.22994	1.02723	13.16	1.18664	1.1219
13.18	2.30896	0.791604	13.18	1.21936	1.43261
13.2	2.38002	1.13785	13.2	1.18133	1.21528
13.22	2.38187	0.788016	13.22	1.21464	1.37599
13.24	2.30469	0.885906	13.24	1.2362	1.40875
13.26	2.3484	0.798359	13.26	1.24215	0.917621
13.28	2.29474	0.797368	13.28	1.24619	1.0793
13.3	2.42076	0.815099	13.3	1.24148	1.0856
13.32	2.39668	0.811989	13.32	1.13475	0.982091
13.34	2.35649	0.520208	13.34	1.18663	1.28434
13.36	2.28771	0.833245	13.36	1.19829	1.34804
13.38	2.28675	0.813873	13.38	1.16445	1.44055
13.4	2.31875	0.564753	13.4	1.22961	1.15133
13.42	2.3825	0.958545	13.42	1.15091	1.06595
13.44	2.32653	0.642124	13.44	1.19021	0.913453
13.46	2.3678	0.895686	13.46	1.24203	1.33742
13.48	2.40909	0.722873	13.48	1.24851	1.19297
13.5	2.34578	0.96747	13.5	1.1486	1.19963
13.52	2.45609	0.910689	13.52	1.18085	1.1018
13.54	2.41353	0.951001	13.54	1.18829	1.27634
13.56	2.42323	0.985528	13.56	1.07521	1.24906
13.58	2.44001	1.06024	13.58	1.14898	1.13701
13.6	2.49802	0.915772	13.6	1.26759	1.2448
13.62	2.43009	0.798185	13.62	1.11619	0.842631
13.64	2.37593	0.695065	13.64	1.12805	1.27311
13.66	2.39156	0.748523	13.66	1.23276	1.25439
13.68	2.3847	0.822902	13.68	1.17152	1.29792
13.7	2.51561	1.08766	13.7	1.25052	1.02493
13.72	2.66909	0.921784	13.72	1.16634	1.09437
13.74	2.67484	0.750549	13.74	1.16407	1.25864
13.76	2.4991	1.06423	13.76	1.1514	0.925747
13.78	2.44992	0.513171	13.78	1.20823	1.03146
13.8	2.51446	0.754168	13.8	1.18362	1.13468
13.82	2.56064	1.07105	13.82	1.21948	1.14121
13.84	2.37766	0.842632	13.84	1.21109	1.08696
13.86	2.28813	0.775475	13.86	1.20724	1.28447
13.88	2.42531	0.748821	13.88	1.31944	1.04888
13.9	2.51781	0.890537	13.9	1.23865	1.02849
13.92	2.52054	0.92091	13.92	1.19648	1.05885
13.94	2.48244	0.960018	13.94	1.1559	0.927731
13.96	2.56035	0.57233	13.96	1.21229	1.21455
13.98	2.59919	0.727198	13.98	1.30206	1.1819
14	2.65673	1.11267	14	1.30853	1.11827
14.02	2.5691	1.06329	14.02	1.28362	0.986583
14.04	2.4802	0.676185	14.04	1.297	0.988137
14.06	2.67306	1.13011	14.06	1.36388	1.04629
14.08	2.67217	0.789259	14.08	1.26295	1.10825
14.1	2.85148	0.91074	14.1	1.20217	1.00635
14.12	2.75595	0.974231	14.12	1.18968	1.05359
14.14	2.64968	0.938692	14.14	1.29212	1.09679
14.16	2.7124	0.783981	14.16	1.26156	1.31976
14.18	2.82136	0.502391	14.18	1.27366	1.19314
14.2	2.74685	0.73648	14.2	1.25709	0.928349
14.22	2.81521	0.922249	14.22	1.30593	1.14453
14.24	2.7264	1.03195	14.24	1.26388	1.36149
14.26	2.81426	1.10052	14.26	1.3458	1.16287
14.28	2.91021	1.07759	14.28	1.26602	1.19937
14.3	3.08525	0.839097	14.3	1.22063	1.16148
14.32	2.93639	0.881318	14.32	1.20581	1.11975
14.34	3.01016	0.981682	14.34	1.30831	1.4133
14.36	3.14713	0.916578	14.36	1.31201	1.08846
14.38	3.01843	1.02192	14.38	1.33242	1.12303
14.4	2.85146	0.874072	14.4	1.27012	1.16214
14.42	2.85479	0.92263	14.42	1.29321	1.1193
14.44	2.84392	1.08827	14.44	1.19876	0.949761
14.46	2.92755	0.773288	14.46	1.25014	1.06579
14.48	2.76933	1.02316	14.48	1.31055	1.34433
14.5	2.90331	0.892906	14.5	1.33318	1.32409
14.52	3.01566	1.00047	14.52	1.37496	1.19847
14.54	2.998	1.04922	14.54	1.30602	1.14298
14.56	3.05216	0.862066	14.56	1.30401	1.37029
14.58	2.94209	0.543802	14.58	1.3359	1.21334
14.6	2.94674	1.11123	14.6	1.2554	1.09449
14.62	3.13401	1.07793	14.62	1.3524	1.0286
14.64	3.09304	1.04859	14.64	1.27683	1.24725
14.66	3.23933	0.832938	14.66	1.34125	1.41736
14.68	3.20024	0.936138	14.68	1.32908	1.26205
14.7	3.19088	0.95652	14.7	1.25876	0.974086
14.72	3.06647	1.16344	14.72	1.25699	1.12508
14.74	2.92581	0.987512	14.74	1.20665	1.18014
14.76	2.69433	0.942138	14.76	1.2244	1.36634
14.78	2.76401	1.11708	14.78	1.27517	1.2484
14.8	2.72948	0.451971	14.8	1.30932	1.20591
14.82	2.67064	1.1713	14.82	1.32856	1.11186
14.84	2.60495	1.04422	14.84	1.27635	1.26751
14.86	2.54672	0.895266	14.86	1.34567	1.19979
14.88	2.46343	0.779933	14.88	1.20992	1.07827
14.9	2.57466	0.974833	14.9	1.18387	1.11903
14.92	2.74197	0.868315	14.92	1.22945	1.2289
14.94	2.84236	0.971359	14.94	1.27015	0.966007
14.96	2.82718	0.816767	14.96	1.3484	0.976981
14.98	2.95101	0.956652	14.98	1.21722	1.22107
15	2.85463	1.02221	15	1.25468	1.14029
15.02	2.86549	0.449098	15.02	1.29748	1.30699
15.04	2.72113	1.02135	15.04	1.30518	1.14421
15.06	2.81651	1.1254	15.06	1.37877	1.17015
15.08	2.76912	0.713176	15.08	1.35715	1.17369
15.1	2.68952	1.00571	15.1	1.31278	1.22956
15.12	2.76274	0.641334	15.12	1.27968	1.31637
15.14	2.82026	0.958895	15.14	1.28878	1.0905
15.16	2.69852	1.11755	15.16	1.20157	1.14663
15.18	2.76869	1.01489	15.18	1.19817	1.06771
15.2	2.96345	0.747427	15.2	1.25437	1.1891
15.22	3.09126	0.856083	15.22	1.30414	1.1323
15.24	3.1335	0.638489	15.24	1.2501	1.38488
15.26	3.19381	0.810877	15.26	1.28683	1.07902
15.28	3.11946	0.86779	15.28	1.24278	1.41801
15.3	3.00038	1.03028	15.3	1.33945	1.08129
15.32	2.87399	1.0714	15.32	1.38602	1.18989
15.34	2.97075	1.05127	15.34	1.36703	1.17551
15.36	2.9374	0.800424	15.36	1.34032	1.29834
15.38	2.80205	0.724604	15.38	1.34378	1.26248
15.4	2.70621	0.486741	15.4	1.28725	1.31562
15.42	2.5603	1.07827	15.42	1.26862	1.23567
15.44	2.67315	0.985315	15.44	1.27618	1.3669
15.46	2.56578	0.905416	15.46	1.32672	1.24246
15.48	2.46013	1.01434	15.48	1.28255	1.06531
15.5	2.52423	0.862215	15.5	1.34021	0.893808
15.52	2.47922	1.14449	15.52	1.3803	1.34745
15.54	2.38192	0.707037	15.54	1.28649	0.961869
15.56	2.20671	0.753972	15.56	1.31544	1.25593
15.58	2.26759	0.730252	15.58	1.30705	1.16497
15.6	2.18555	0.64597	15.6	1.35668	1.39359
15.62	2.34382	0.945359	15.62	1.27548	1.09612
15.64	2.25926	0.704272	15.64	1.24938	0.980465
15.66	2.35577	0.766466	15.66	1.31473	0.943864
15.68	2.61112	0.428831	15.68	1.22563	1.08896
15.7	2.65149	0.889372	15.7	1.25856	1.45945
15.72	2.70207	0.766091	15.72	1.22102	1.18895
15.74	2.80335	0.764443	15.74	1.26506	1.12915
15.76	2.99209	0.82399	15.76	1.34323	1.17958
15.78	3.0168	0.841221	15.78	1.41528	1.20235
15.8	3.16333	1.01169	15.8	1.29223	1.3069
15.82	3.0012	0.840042	15.82	1.27305	1.25539
15.84	2.99932	0.883369	15.84	1.31284	1.02503
15.86	2.89887	0.513269	15.86	1.32982	1.22465
15.88	2.99429	0.914814	15.88	1.30813	1.33698
15.9	3.03799	0.896112	15.9	1.34282	1.01311
15.92	3.08467	0.887529	15.92	1.36279	1.2374
15.94	3.0762	0.695085	15.94	1.27344	1.41904
15.96	3.00856	1.08403	15.96	1.29229	1.2081
15.98	2.94318	0.79347	15.98	1.3185	1.09599
16	2.89871	0.891592	16	1.21385	1.14919
16.02	2.86438	0.969406	16.02	1.2046	1.24027
16.04	2.9278	0.816858	16.04	1.35344	1.07446
16.06	2.95546	0.853702	16.06	1.25309	1.13774
16.08	3.004	1.05669	16.08	1.36746	1.32084
16.1	2.92247	1.07425	16.1	1.31827	1.05155
16.12	2.93963	0.918492	16.12	1.30607	1.04371
16.14	2.99636	0.544017	16.14	1.27018	0.918162
16.16	2.9329	0.497712	16.16	1.22023	1.42885
16.18	2.93977	0.918426	16.18	1.36716	1.11765
16.2	2.84447	0.854746	16.2	1.42648	1.33923
16.22	2.871	0.852244	16.22	1.37903	0.884659
16.24	2.80565	0.976296	16.24	1.36455	1.28067
16.26	2.67839	0.444198	16.26	1.28712	1.15591
16.28	2.71622	0.707007	16.28	1.288	0.92084
16.3	2.75498	1.02695	16.3	1.36409	1.25266
16.32	2.6842	0.875639	16.32	1.36008	1.32514
16.34	2.78232	0.806048	16.34	1.38326	1.20035
16.36	2.71445	0.790111	16.36	1.38119	1.13095
16.38	2.69416	0.81317	16.38	1.23334	1.24408
16.4	2.76271	0.991695	16.4	1.32871	1.21874
16.42	2.67048	0.98395	16.42	1.30462	1.16075
16.44	2.63887	0.973435	16.44	1.32397	1.04957
16.46	2.91269	0.778588	16.46	1.26457	1.03688
16.48	2.9174	0.839411	16.48	1.26921	1.08527
16.5	2.68537	0.729766	16.5	1.31254	1.04671
16.52	2.82729	1.12854	16.52	1.25467	1.2534
16.54	2.73926	0.986019	16.54	1.24432	1.12823
16.56	2.71872	1.041	16.56	1.27491	1.2227
16.58	2.70604	0.93927	16.58	1.32165	1.18835
16.6	2.75078	1.08417	16.6	1.33676	0.982536
16.62	2.68075	0.979199	16.62	1.31035	1.03031
16.64	2.86614	0.545786	16.64	1.30678	0.803255
16.66	2.85197	0.96935	16.66	1.36075	1.12293
16.68	2.92211	1.03893	16.68	1.34409	1.04055
16.7	2.86488	0.94531	16.7	1.30799	1.28287
16.72	2.73318	0.664963	16.72	1.2987	0.874033
16.74	2.74354	0.800474	16.74	1.29467	1.33328
16.76	2.89068	0.93428	16.76	1.3404	0.746395
16.78	2.76728	0.58147	16.78	1.34273	1.05535
16.8	2.60546	0.551428	16.8	1.17945	1.11316
16.82	2.66765	0.630265	16.82	1.32629	1.19005
16.84	2.72797	0.702596	16.84	1.20562	1.33581
16.86	2.8504	0.71694	16.86	1.29197	1.18132
16.88	2.71885	0.723235	16.88	1.2982	1.2092
16.9	2.66919	1.00755	16.9	1.2087	0.803332
16.92	2.42329	0.491984	16.92	1.15614	1.28893
16.94	2.37933	1.10658	16.94	1.24721	1.24299
16.96	2.40484	0.900173	16.96	1.28136	1.09738
16.98	2.31321	0.294709	16.98	1.2514	1.03202
17	2.44439	0.906931	17	1.32964	0.888333
17.02	2.61356	1.11794	17.02	1.3084	0.778071
17.04	2.60548	0.843245	17.04	1.3955	1.2789
17.06	2.53812	0.560672	17.06	1.30253	1.09625
17.08	2.60652	1.00765	17.08	1.31426	1.01471
17.1	2.6966	0.861833	17.1	1.28989	1.05689
17.12	2.50694	0.562396	17.12	1.23936	0.856768
17.14	2.46883	0.994909	17.14	1.36036	1.03139
17.16	2.58618	0.685068	17.16	1.36155	1.1519
17.18	2.53367	0.818822	17.18	1.30822	0.873421
17.2	2.73887	0.527535	17.2	1.28232	1.16546
17.22	2.63738	0.503567	17.22	1.2986	1.20751
17.24	2.65475	0.776451	17.24	1.26292	1.16595
17.26	2.59456	0.822085	17.26	1.20391	1.06234
17.28	2.72369	0.992911	17.28	1.24111	1.14157
17.3	2.76557	1.04409	17.3	1.14145	1.30212
17.32	2.61134	0.714685	17.32	1.23492	0.88095
17.34	2.67524	0.87278	17.34	1.20352	1.2432
17.36	2.55813	0.781446	17.36	1.17842	1.09779
17.38	2.60811	1.05977	17.38	1.25032	1.08188
17.4	2.82785	0.968569	17.4	1.19913	0.89829
17.42	2.97647	1.08413	17.42	1.23002	1.13487
17.44	3.06561	0.852069	17.44	1.25637	1.17893
17.46	2.99879	0.840851	17.46	1.26159	1.39459
17.48	3.0786	0.817541	17.48	1.22961	1.23495
17.5	2.99888	0.699222	17.5	1.29201	1.0536
17.52	3.13517	0.76545	17.52	1.22393	0.838608
17.54	3.07106	0.557902	17.54	1.16461	1.29245
17.56	2.96902	0.800417	17.56	1.24487	0.874374
17.58	2.90387	1.0312	17.58	1.2306	1.25641
17.6	2.8135	1.08915	17.6	1.23978	1.123
17.62	3.13097	1.09617	17.62	1.30457	1.19387
17.64	3.09958	1.18436	17.64	1.21919	1.2248
17.66	3.10171	0.796149	17.66	1.15174	0.858473
17.68	3.19146	0.90922	17.68	1.24545	1.28731
17.7	3.10821	1.00745	17.7	1.31981	1.32514
17.72	2.97654	1.08257	17.72	1.33785	1.04637
17.74	3.17841	0.789647	17.74	1.29482	1.16445
17.76	3.26366	0.857982	17.76	1.34423	1.32766
17.78	3.3629	0.734395	17.78	1.33857	1.11609
17.8	3.51723	0.70327	17.8	1.26861	0.898955
17.82	3.2752	0.74633	17.82	1.33257	1.02024
17.84	3.09656	0.910123	17.84	1.33265	1.27699
17.86	3.26106	0.680597	17.86	1.26539	1.13269
17.88	3.38504	0.713135	17.88	1.31141	1.30778
17.9	3.42488	0.87503	17.9	1.32246	1.14159
17.92	3.25512	0.832974	17.92	1.37007	1.24147
17.94	3.18229	0.806555	17.94	1.34077	1.14283
17.96	3.00407	0.522946	17.96	1.22484	0.891791
17.98	2.89617	1.10413	17.98	1.24227	1.15086
18	3.11397	0.645396	18	1.28951	1.10199
18.02	3.0055	0.74622	18.02	1.27769	1.32618
18.04	2.90517	0.927461	18.04	1.26307	1.27948
18.06	3.02455	0.935833	18.06	1.279	1.16187
18.08	3.08404	0.911492	18.08	1.26475	1.17335
18.1	3.18785	0.978861	18.1	1.25178	1.24314
18.12	2.84296	0.944622	18.12	1.2519	1.00608
18.14	2.83613	0.926002	18.14	1.31705	0.970017
18.16	2.8668	0.789475	18.16	1.2002	0.916271
18.18	2.64096	1.09576	18.18	1.25719	1.04275
18.2	2.65513	0.967627	18.2	1.28931	0.965328
18.22	2.62934	0.523463	18.22	1.22051	1.16944
18.24	2.70294	0.600384	18.24	1.25878	1.2282
18.26	2.79073	1.1278	18.26	1.30017	1.32744
18.28	2.86043	0.598388	18.28	1.23772	1.27515
18.3	2.84291	0.82032	18.3	1.28141	1.36276
18.32	2.74287	0.771693	18.32	1.25561	1.04094
18.34	2.66106	1.11181	18.34	1.29319	0.99815
18.36	2.68481	0.98143	18.36	1.33294	1.30871
18.38	2.46013	1.08388	18.38	1.29647	1.22798
18.4	2.39908	1.11751	18.4	1.29744	1.4217
18.42	2.43139	1.11432	18.42	1.30528	0.993646
18.44	2.29776	1.03145	18.44	1.34757	1.40812
18.46	2.30759	0.881869	18.46	1.19044	1.41585
18.48	2.36778	1.0082	18.48	1.26945	1.16288
18.5	2.22697	0.810547	18.5	1.28382	1.36152
18.52	2.23639	1.15288	18.52	1.26016	1.1329
18.54	2.05727	0.893512	18.54	1.27076	0.924798
18.56	1.89174	0.849403	18.56	1.23161	1.18304
18.58	2.17773	0.93932	18.58	1.25413	1.15719
18.6	2.12929	1.0548	18.6	1.1806	1.39672
18.62	2.18755	0.852914	18.62	1.27339	0.987051
18.64	2.315	1.03989	18.64	1.25442	1.30324
18.66	2.38831	1.09997	18.66	1.23995	1.24146
18.68	2.20969	0.96691	18.68	1.25589	1.04196
18.7	2.27101	1.04324	18.7	1.29661	1.18139
18.72	2.42034	0.943085	18.72	1.30209	1.19545
18.74	2.21575	1.02412	18.74	1.25879	1.20685
18.76	2.34839	0.837494	18.76	1.28447	1.40917
18.78	2.38532	0.56757	18.78	1.27407	1.23408
18.8	2.47345	1.04836	18.8	1.24421	0.993222
18.82	2.34962	1.15423	18.82	1.2675	1.22239
18.84	2.3251	1.0928	18.84	1.25646	1.12841
18.86	2.4532	0.456695	18.86	1.21991	1.3009
18.88	2.432	0.640415	18.88	1.26534	1.35443
18.9	2.27572	0.907432	18.9	1.3043	1.04947
18.92	2.48629	1.04544	18.92	1.31301	1.31952
18.94	2.53165	0.74323	18.94	1.26745	1.30237
18.96	2.68415	0.977263	18.96	1.28737	1.35042
18.98	2.71727	0.85262	18.98	1.31199	1.43062
19	2.47959	1.10151	19	1.14908	1.12089
19.02	2.32634	0.764147	19.02	1.28277	1.14388
19.04	2.31678	1.14873	19.04	1.34488	1.18515
19.06	2.41076	0.444296	19.06	1.25039	1.13621
19.08	2.43025	0.846282	19.08	1.36086	1.12546
19.1	2.57994	0.937933	19.1	1.21235	1.16569
19.12	2.60496	1.02684	19.12	1.31824	1.2171
19.14	2.4706	1.04683	19.14	1.35074	0.928459
19.16	2.40303	0.758365	19.16	1.31237	1.04734
19.18	2.42915	0.804438	19.18	1.34541	1.21845
19.2	2.42825	0.795438	19.2	1.28226	1.176
19.22	2.23047	1.09174	19.22	1.22428	0.994092
19.24	2.34336	1.00283	19.24	1.25204	1.24981
19.26	2.42083	1.07556	19.26	1.30092	1.22642
19.28	2.23642	0.940942	19.28	1.23447	1.15041
19.3	2.18643	0.922936	19.3	1.33384	1.08279
19.32	2.22773	1.11488	19.32	1.29283	1.22424
19.34	2.13551	0.8553	19.34	1.25633	1.15313
19.36	2.23939	0.764664	19.36	1.25244	1.1821
19.38	2.19588	1.05316	19.38	1.32862	1.23798
19.4	2.32107	0.964589	19.4	1.32394	1.19698
19.42	2.18696	0.93314	19.42	1.35264	1.23422
19.44	2.26106	0.971755	19.44	1.32936	1.14868
19.46	2.15796	1.10758	19.46	1.27604	1.37509
19.48	2.26063	0.984382	19.48	1.32451	1.23649
19.5	2.31676	1.06107	19.5	1.23269	0.936154
19.52	2.18156	1.11081	19.52	1.32505	1.20423
19.54	2.25394	1.08355	19.54	1.18704	1.08221
19.56	2.34905	1.17852	19.56	1.22399	1.30631
19.58	2.24002	1.10581	19.58	1.25483	1.24955
19.6	2.27309	0.759246	19.6	1.33243	1.38167
19.62	2.40668	0.735515	19.62	1.34973	1.19159
19.64	2.27955	0.971022	19.64	1.34469	1.25081
19.66	2.33257	0.6203	19.66	1.28709	1.20761
19.68	2.45529	0.399852	19.68	1.39602	1.2226
19.7	2.31567	0.537899	19.7	1.33788	1.3459
19.72	2.52663	0.758361	19.72	1.40679	1.10438
19.74	2.51145	0.897983	19.74	1.34743	1.00557
19.76	2.75009	0.441723	19.76	1.33708	1.17901
19.78	2.65389	0.89062	19.78	1.33728	1.40845
19.8	2.78356	0.905909	19.8	1.34142	1.38631
19.82	2.83725	0.857863	19.82	1.2854	1.30319
19.84	2.5563	1.06022	19.84	1.30129	1.22688
19.86	2.623	0.895737	19.86	1.40443	1.33679
19.88	2.68197	0.80528	19.88	1.25359	1.18868
19.9	2.62409	1.09065	19.9	1.21519	1.18431
19.92	2.51856	0.994924	19.92	1.22852	1.10238
19.94	2.58806	0.862811	19.94	1.23686	1.16874
19.96	2.44199	0.779588	19.96	1.24791	1.35579
19.98	2.26547	0.881035	19.98	1.23952	1.28809
20	2.36946	1.10928	20	1.19355	1.0318
20.02	2.43456	0.865065	20.02	1.30214	1.27625
20.04	2.47585	0.581335	20.04	1.22303	1.03677
20.06	2.56989	0.845056	20.06	1.25612	1.23877
20.08	2.6193	0.684003	20.08	1.25582	1.35576
20.1	2.51938	0.399508	20.1	1.18089	1.47772
20.12	2.54855	0.516749	20.12	1.22915	1.28502
20.14	2.44187	0.698122	20.14	1.32817	1.24407
20.16	2.53049	0.796538	20.16	1.33312	1.19557
20.18	2.38491	0.694731	20.18	1.33397	1.16275
20.2	2.44188	0.93841	20.2	1.40862	1.35688
20.22	2.48461	0.745866	20.22	1.28939	1.20619
20.24	2.47587	0.74432	20.24	1.28785	1.06107
20.26	2.31025	0.582454	20.26	1.20334	1.00602
20.28	2.4299	0.930812	20.28	1.32684	1.44825
20.3	2.349	1.05046	20.3	1.22219	1.34875
20.32	2.26901	0.917772	20.32	1.30627	1.33511
20.34	2.21021	1.04723	20.34	1.29602	1.27519
20.36	2.16366	0.807931	20.36	1.32975	1.2753
20.38	2.16904	0.88547	20.38	1.26196	0.928933
20.4	2.02406	0.815027	20.4	1.32601	1.29649
20.42	2.08282	1.05027	20.42	1.35872	1.08098
20.44	2.28539	1.08444	20.44	1.32628	1.02402
20.46	2.35398	1.10834	20.46	1.16481	1.15384
20.48	2.36289	0.905121	20.48	1.2943	1.14995
20.5	2.29476	0.546445	20.5	1.30229	1.00835
20.52	2.40039	0.91617	20.52	1.2258	1.10951
20.54	2.26329	0.84481	20.54	1.33549	1.25231
20.56	2.31471	0.752092	20.56	1.32685	1.20357
20.58	2.35149	0.59751	20.58	1.35192	1.20588
20.6	2.28731	0.719088	20.6	1.27479	1.2761
20.62	2.2492	0.54844	20.62	1.30911	1.15618
20.64	2.26294	0.715557	20.64	1.32376	1.28392
20.66	2.19071	0.762038	20.66	1.2891	1.37849
20.68	2.1762	0.537929	20.68	1.27498	1.27179
20.7	2.16878	0.55639	20.7	1.29077	1.00783
20.72	1.97011	0.627634	20.72	1.24529	1.16854
20.74	2.14159	0.6454	20.74	1.23038	1.25865
20.76	2.10641	1.02805	20.76	1.27549	1.28344
20.78	2.23214	0.996892	20.78	1.33059	1.4746
20.8	2.30783	1.11667	20.8	1.3195	1.39066
20.82	2.23244	0.81754	20.82	1.29103	1.04416
20.84	2.198	0.876737	20.84	1.28661	0.910814
20.86	2.10072	0.622838	20.86	1.31341	1.35333
20.88	2.1138	0.7489	20.88	1.3358	1.09482
20.9	2.2279	1.05392	20.9	1.26812	1.13985
20.92	2.31729	0.880818	20.92	1.17163	1.19821
20.94	2.35703	0.904169	20.94	1.34654	1.30346
20.96	2.46418	1.00291	20.96	1.26774	1.29522
20.98	2.63036	0.543648	20.98	1.27151	1.44704
21	2.58939	0.966579	21	1.34916	1.21982
21.02	2.56743	0.901432	21.02	1.26657	1.35743
21.04	2.62794	1.01208	21.04	1.36203	1.37604
21.06	2.49438	0.946459	21.06	1.30523	1.16488
21.08	2.49422	0.948812	21.08	1.3145	1.39045
21.1	2.5574	0.766602	21.1	1.36564	1.0728
21.12	2.64424	0.869065	21.12	1.31152	1.08981
21.14	2.38391	0.553524	21.14	1.27671	0.996756
21.16	2.41576	1.05559	21.16	1.37808	1.19332
21.18	2.43683	1.13441	21.18	1.38353	1.27647
21.2	2.40109	0.588925	21.2	1.42879	1.17402
21.22	2.52911	0.667335	21.22	1.43102	1.29235
21.24	2.55119	1.04599	21.24	1.38084	1.45112
21.26	2.45872	0.66975	21.26	1.37435	1.22851
21.28	2.41499	0.723421	21.28	1.40051	1.23353
21.3	2.68999	0.853884	21.3	1.33787	1.16379
21.32	2.63057	0.748713	21.32	1.19482	0.998822
21.34	2.45033	1.03688	21.34	1.37522	1.39625
21.36	2.52821	0.870285	21.36	1.36183	1.09014
21.38	2.57662	0.803866	21.38	1.36974	1.39994
21.4	2.53018	0.484008	21.4	1.34354	1.10258
21.42	2.51396	1.03713	21.42	1.32592	1.02515
21.44	2.5117	0.930306	21.44	1.31109	1.27218
21.46	2.49329	0.750844	21.46	1.28938	0.94549
21.48	2.54294	0.657573	21.48	1.24436	1.20929
21.5	2.66763	0.940744	21.5	1.24347	1.09813
21.52	2.60282	0.939095	21.52	1.35153	0.982919
21.54	2.8289	0.886805	21.54	1.30311	0.947115
21.56	2.81212	0.878505	21.56	1.38365	1.19378
21.58	2.84303	0.99302	21.58	1.38076	1.25182
21.6	2.96217	1.01532	21.6	1.31385	1.21707
21.62	2.89836	0.969095	21.62	1.32695	1.28975
21.64	3.06861	1.08964	21.64	1.27171	1.16657
21.66	2.96951	1.11655	21.66	1.38691	1.25548
21.68	3.00869	0.886486	21.68	1.38539	1.35285
21.7	2.71739	0.96102	21.7	1.34236	1.19051
21.72	2.97623	1.16903	21.72	1.32034	1.13221
21.74	2.81456	0.984118	21.74	1.25017	1.11649
21.76	2.79332	0.71351	21.76	1.45692	1.1782
21.78	2.62666	0.811516	21.78	1.29438	1.07461
21.8	2.57916	0.369754	21.8	1.2483	1.16573
21.82	2.38839	0.564587	21.82	1.37065	1.16856
21.84	2.53924	0.663786	21.84	1.35558	1.14737
21.86	2.32389	0.804075	21.86	1.33027	1.32094
21.88	2.23977	0.90759	21.88	1.36136	1.26978
21.9	2.26272	0.908166	21.9	1.36658	1.06836
21.92	2.32257	0.858263	21.92	1.38462	0.952895
21.94	2.23771	0.923238	21.94	1.42903	1.0818
21.96	2.38599	0.83763	21.96	1.43837	1.12846
21.98	2.28544	0.589616	21.98	1.42177	1.21962
22	2.41682	0.461404	22	1.47268	1.26873
22.02	2.41958	0.836366	22.02	1.38896	0.906253
22.04	2.32307	0.666804	22.04	1.30273	1.17189
22.06	2.38656	1.1245	22.06	1.30738	1.02415
22.08	2.4399	1.09775	22.08	1.39231	1.1487
22.1	2.4655	0.894556	22.1	1.50107	1.21549
22.12	2.45307	0.743078	22.12	1.45326	1.30022
22.14	2.50476	1.14931	22.14	1.47133	1.17437
22.16	2.6576	1.20123	22.16	1.41318	0.948339
22.18	2.68725	1.11595	22.18	1.44454	1.1285
22.2	2.80647	0.854131	22.2	1.35378	1.26383
22.22	2.82684	1.01872	22.22	1.42945	1.04519
22.24	2.83663	0.836473	22.24	1.45132	1.30128
22.26	2.8137	0.947531	22.26	1.50823	1.1875
22.28	2.9508	0.908941	22.28	1.47225	1.27556
22.3	2.92111	1.14681	22.3	1.47589	1.26106
22.32	2.93143	0.831433	22.32	1.49514	1.14172
22.34	2.63791	0.766161	22.34	1.39241	1.04963
22.36	2.62837	0.70359	22.36	1.37262	1.18377
22.38	2.72943	1.04763	22.38	1.43427	1.20304
22.4	2.56873	1.04667	22.4	1.36189	1.18661
22.42	2.56738	1.0559	22.42	1.37963	1.33722
22.44	2.47853	1.08932	22.44	1.40856	1.12822
22.46	2.56332	0.707685	22.46	1.39014	1.25328
22.48	2.64229	1.05755	22.48	1.40902	1.17481
22.5	2.66581	0.795717	22.5	1.3888	1.21722
22.52	2.54869	0.774841	22.52	1.32715	1.22583
22.54	2.75801	1.07345	22.54	1.35427	1.39785
22.56	2.74794	0.868806	22.56	1.33901	1.36456
22.58	2.81293	0.974481	22.58	1.37125	1.25373
22.6	2.66973	0.707463	22.6	1.41815	1.43701
22.62	2.75911	0.99102	22.62	1.28334	1.02743
22.64	2.78842	1.03045	22.64	1.21994	1.32931
22.66	2.65114	1.03172	22.66	1.31294	1.15971
22.68	2.44832	0.780082	22.68	1.36167	1.16437
22.7	2.67423	1.02177	22.7	1.3509	1.33916
22.72	2.66759	0.648726	22.72	1.27704	1.17378
22.74	2.59493	0.96141	22.74	1.25201	0.98329
22.76	2.77975	0.968523	22.76	1.22861	1.07284
22.78	2.77221	0.506522	22.78	1.26817	1.2831
22.8	2.59192	1.02655	22.8	1.31482	1.15045
22.82	2.51322	0.78918	22.82	1.29668	1.01448
22.84	2.51865	0.915556	22.84	1.14371	1.31279
22.86	2.42447	0.71985	22.86	1.21699	0.952728
22.88	2.47981	1.00991	22.88	1.30063	1.24298
22.9	2.39161	0.752679	22.9	1.30291	0.945005
22.92	2.36641	0.870973	22.92	1.23745	1.08684
22.94	2.24191	0.775514	22.94	1.40129	1.11119
22.96	2.24405	0.998416	22.96	1.29907	0.847393
22.98	2.33227	1.11854	22.98	1.26439	1.05837
23	2.37205	1.0832	23	1.37015	1.355
23.02	2.3151	0.948353	23.02	1.3226	1.15615
23.04	2.4169	0.837968	23.04	1.39751	1.19755
23.06	2.38029	0.803339	23.06	1.28137	1.11054
23.08	2.60605	1.02551	23.08	1.29805	0.984481
23.1	2.76525	1.0682	23.1	1.30425	1.13719
23.12	2.69273	1.06777	23.12	1.35151	1.18823
23.14	2.64294	0.490018	23.14	1.40446	1.33681
23.16	2.57255	0.900888	23.16	1.42799	1.42717
23.18	2.67759	0.981116	23.18	1.29113	1.21859
23.2	2.79834	0.816866	23.2	1.33925	1.2392
23.22	2.72722	0.907027	23.22	1.27771	1.02951
23.24	2.70218	0.994453	23.24	1.30909	0.972045
23.26	2.91011	1.03128	23.26	1.33077	1.16136
23.28	2.98612	0.799125	23.28	1.31177	1.07569
23.3	2.9651	0.662169	23.3	1.31049	1.03229
23.32	2.99974	0.889965	23.32	1.26803	1.14826
23.34	2.91665	1.10532	23.34	1.40358	1.23317
23.36	3.01557	1.07365	23.36	1.36353	1.20925
23.38	2.89287	0.923581	23.38	1.3094	1.05281
23.4	2.80722	0.974593	23.4	1.37271	1.25313
23.42	2.83951	0.934442	23.42	1.31068	1.56556
23.44	3.06224	0.688833	23.44	1.31264	1.05783
23.46	3.02792	0.993525	23.46	1.35813	1.21793
23.48	3.10516	1.05172	23.48	1.35197	1.39299
23.5	2.94109	0.757514	23.5	1.35506	1.1276
23.52	2.97342	0.640843	23.52	1.27492	1.05243
23.54	3.13948	0.628735	23.54	1.41687	1.0041
23.56	3.16902	1.0519	23.56	1.32531	1.00102
23.58	3.09561	0.792767	23.58	1.33687	0.910056
23.6	3.19789	0.776369	23.6	1.41385	1.26428
23.62	3.15223	1.10115	23.62	1.26549	1.16233
23.64	3.06125	0.65331	23.64	1.34521	1.16391
23.66	3.26893	0.548275	23.66	1.32395	1.12088
23.68	3.32695	1.07591	23.68	1.20856	1.34067
23.7	3.33263	0.576536	23.7	1.35077	1.12553
23.72	3.25907	1.0693	23.72	1.29818	1.43618
23.74	3.20437	0.90508	23.74	1.34417	1.07792
23.76	3.38106	0.785773	23.76	1.41999	1.27416
23.78	3.48549	0.75456	23.78	1.3848	1.32542
23.8	3.51715	0.643348	23.8	1.31491	1.27329
23.82	3.43438	1.01577	23.82	1.3714	1.0705
23.84	3.54435	0.43788	23.84	1.3322	1.06391
23.86	3.5403	0.886418	23.86	1.37779	1.45746
23.88	3.37567	1.00651	23.88	1.32482	1.30217
23.9	3.55713	1.08685	23.9	1.30373	1.36796
23.92	3.37678	1.18453	23.92	1.3214	1.43501
23.94	3.48547	1.10833	23.94	1.27901	1.40839
23.96	3.44983	0.95804	23.96	1.34983	1.17674
23.98	3.51821	0.808921	23.98	1.37216	1.20335
24	3.39153	0.974808	24	1.42588	1.21187
24.02	3.24526	0.904628	24.02	1.38063	1.28125
[truncated: 1,300 more rows]
