# Supplementary material for: Virtual Screening for FDA-Approved Drugs That Selectively Inhibit Arginase Type 1 and 2
Source: Molecules. 2022 Aug 12;27(16):5134. doi: 10.3390/molecules27165134 (PMC9416497; doi:10.3390/molecules27165134)
Supplement: Supplementary file 1 [file molecules-27-05134-s001.zip › Table S9.xlsx]

## Sheet: candesartan
Time (ns)	protein_ARG1	LIG_Candesartan	Time (ns)	protein_ARG2	LIG_Candesartan
0.02	0.846584	0.751056	0.02	0.630124	1.08785
0.04	0.875877	0.65768	0.04	0.701339	1.40487
0.06	1.17505	0.654212	0.06	0.61541	1.34006
0.08	1.31063	0.881247	0.08	0.697387	1.80858
0.1	1.29909	0.707469	0.1	0.777875	2.19766
0.12	1.1897	1.25535	0.12	0.725785	1.98666
0.14	1.2754	1.28506	0.14	0.742782	2.38058
0.16	1.46192	1.2678	0.16	0.710995	2.25141
0.18	1.61651	2.19575	0.18	0.766281	1.79489
0.2	1.72558	1.90277	0.2	0.808656	2.01629
0.22	1.76687	2.04606	0.22	0.896384	2.24951
0.24	1.74641	1.71393	0.24	0.882616	2.18533
0.26	1.83267	1.75393	0.26	0.824545	2.0632
0.28	1.81283	2.04073	0.28	0.831701	2.19385
0.3	1.63684	1.8827	0.3	0.802904	1.91024
0.32	1.74553	1.85359	0.32	0.780411	2.07115
0.34	1.71743	1.92505	0.34	0.843413	2.21351
0.36	1.64822	2.05145	0.36	0.863879	2.43961
0.38	1.73956	1.81169	0.38	0.845589	2.46364
0.4	1.61778	1.51436	0.4	0.874332	1.87965
0.42	1.68033	1.27042	0.42	0.865286	2.20893
0.44	1.71444	1.17956	0.44	0.887753	2.33982
0.46	1.86922	1.20064	0.46	0.906683	2.25468
0.48	1.81185	1.63584	0.48	1.00269	2.54499
0.5	1.73227	1.38899	0.5	0.86504	2.44055
0.52	1.6616	1.81013	0.52	1.02199	2.51162
0.54	1.67035	1.69751	0.54	1.01491	2.50063
0.56	1.79103	2.01972	0.56	1.03125	2.46877
0.58	1.69592	2.12385	0.58	0.997349	2.7083
0.6	1.71492	2.4457	0.6	1.01915	2.43434
0.62	1.7361	2.36872	0.62	1.04561	2.89047
0.64	1.86458	2.12572	0.64	0.979557	2.62248
0.66	1.92259	2.04923	0.66	1.01428	2.86731
0.68	1.98565	2.37635	0.68	1.04006	2.5472
0.7	1.90257	2.42564	0.7	1.07177	2.77106
0.72	1.90004	2.59034	0.72	0.99956	2.74695
0.74	1.85251	2.7674	0.74	1.03304	2.44902
0.76	1.97177	2.46725	0.76	1.00362	2.66819
0.78	1.93058	1.85186	0.78	0.995918	2.89124
0.8	2.11207	2.08475	0.8	0.990742	2.84357
0.82	2.10301	2.32627	0.82	1.04102	2.84113
0.84	2.21536	1.92384	0.84	0.949232	3.07254
0.86	2.29604	2.00304	0.86	0.952175	2.85521
0.88	2.54765	1.93191	0.88	0.827064	2.89168
0.9	2.62129	1.90489	0.9	0.940592	2.86525
0.92	2.63663	1.88433	0.92	0.931661	2.75032
0.94	2.56316	2.16279	0.94	0.98075	2.85242
0.96	2.4646	2.10164	0.96	1.02563	2.65375
0.98	2.59355	1.86269	0.98	1.13367	2.2818
1	2.5009	1.88772	1	1.0818	2.65758
1.02	2.54086	1.36694	1.02	0.995533	2.50379
1.04	2.52856	1.47588	1.04	0.964806	2.64865
1.06	2.57818	1.33155	1.06	1.08693	2.66289
1.08	2.51583	1.23874	1.08	1.05592	2.61176
1.1	2.52274	1.32678	1.1	0.933681	2.33532
1.12	2.5101	1.03544	1.12	0.932597	2.61407
1.14	2.52748	1.46065	1.14	0.942258	2.43828
1.16	2.4586	1.31304	1.16	0.933541	2.63356
1.18	2.39293	1.27594	1.18	0.980084	2.76022
1.2	2.416	1.32346	1.2	0.934325	2.8549
1.22	2.34266	1.17857	1.22	0.907011	2.64586
1.24	2.25758	1.27614	1.24	0.988051	2.77195
1.26	2.2117	1.44177	1.26	0.932112	2.68469
1.28	2.30781	1.11012	1.28	0.932035	2.42119
1.3	2.2196	1.58586	1.3	0.887916	2.90726
1.32	2.172	1.28386	1.32	0.958148	2.66826
1.34	2.0974	1.13523	1.34	0.906071	2.69818
1.36	2.10571	1.1814	1.36	0.991903	2.72464
1.38	2.19617	1.31864	1.38	1.11041	2.6186
1.4	2.33125	1.42442	1.4	0.969933	2.85501
1.42	2.28121	1.5953	1.42	0.949548	2.8578
1.44	2.18137	1.51494	1.44	0.942589	2.88779
1.46	2.20049	1.28603	1.46	0.947462	2.70544
1.48	2.29516	1.23647	1.48	0.918846	3.30401
1.5	2.01989	1.05804	1.5	1.00709	2.86896
1.52	2.15162	1.32292	1.52	1.04583	2.91766
1.54	2.26881	1.7667	1.54	1.08258	2.89595
1.56	2.29969	1.66008	1.56	0.954347	2.76281
1.58	2.2631	1.64068	1.58	1.05624	2.51894
1.6	2.28463	1.87314	1.6	1.02683	2.67468
1.62	2.45206	1.77124	1.62	0.958382	2.68394
1.64	2.36318	1.36033	1.64	1.00615	2.61704
1.66	2.28835	1.48156	1.66	1.04066	2.35635
1.68	2.33153	1.70926	1.68	1.02553	2.54263
1.7	2.25125	1.78652	1.7	1.01084	2.56331
1.72	2.30508	1.52044	1.72	1.03606	2.45142
1.74	2.22449	1.57595	1.74	1.07625	2.61617
1.76	2.22953	0.856004	1.76	1.00542	2.66928
1.78	2.27446	1.33299	1.78	1.06569	2.65168
1.8	2.1338	0.924056	1.8	1.03736	2.31877
1.82	2.22384	1.28451	1.82	1.07656	2.59827
1.84	2.26478	1.2379	1.84	0.944681	2.66283
1.86	2.19339	1.05702	1.86	1.08037	2.8998
1.88	2.32219	1.2143	1.88	1.13598	2.69641
1.9	2.1791	1.6004	1.9	0.97485	2.66676
1.92	2.24886	1.09865	1.92	0.948425	2.45445
1.94	2.20683	1.79426	1.94	0.988845	2.62926
1.96	2.49845	1.78534	1.96	0.93625	2.59401
1.98	2.43689	1.49044	1.98	1.00732	2.66639
2	2.34088	1.38913	2	0.996113	2.61853
2.02	2.38678	1.56026	2.02	1.06209	2.83389
2.04	2.46463	2.12823	2.04	0.959573	2.80418
2.06	2.43555	1.98409	2.06	1.03137	2.84516
2.08	2.47317	1.82915	2.08	1.00933	2.85946
2.1	2.51709	1.09672	2.1	1.01552	2.79609
2.12	2.46328	1.50259	2.12	1.03129	2.70575
2.14	2.44902	1.60757	2.14	1.02785	2.67445
2.16	2.37149	1.25099	2.16	0.967762	2.58871
2.18	2.26524	1.42792	2.18	0.966211	2.37743
2.2	2.39365	1.39444	2.2	1.01261	2.69713
2.22	2.31473	1.438	2.22	0.956066	3.01767
2.24	2.30566	1.506	2.24	1.002	2.67346
2.26	2.19586	1.58208	2.26	0.961279	2.65476
2.28	2.45824	1.55134	2.28	1.01835	2.81987
2.3	2.40856	1.82138	2.3	1.04968	2.29825
2.32	2.26997	1.56437	2.32	0.996782	2.78114
2.34	2.33062	1.34999	2.34	1.04435	2.79569
2.36	2.3026	1.54728	2.36	1.01648	2.91009
2.38	2.18726	1.82225	2.38	0.989035	2.66461
2.4	2.33441	1.47267	2.4	1.01428	2.34483
2.42	2.38221	1.38512	2.42	0.944737	2.53091
2.44	2.40789	1.55712	2.44	1.05375	2.72351
2.46	2.38615	1.40383	2.46	1.01836	2.34951
2.48	2.41393	1.51458	2.48	0.963249	2.79965
2.5	2.45994	1.33005	2.5	0.935837	2.81373
2.52	2.26979	1.37114	2.52	0.965605	3.22568
2.54	2.34105	1.30656	2.54	0.894828	3.18587
2.56	2.30398	1.55613	2.56	1.01759	3.07706
2.58	2.30835	1.44118	2.58	1.00349	3.55489
2.6	2.54886	1.50932	2.6	1.03331	3.35434
2.62	2.38227	1.36876	2.62	1.13334	3.18916
2.64	2.33599	1.23526	2.64	0.972573	3.08142
2.66	2.3443	1.19467	2.66	0.995705	2.89491
2.68	2.29716	1.16453	2.68	0.998222	3.29334
2.7	2.29076	1.54585	2.7	0.975799	3.12855
2.72	2.36706	1.30489	2.72	0.982115	3.21373
2.74	2.45674	1.53864	2.74	0.98661	3.12025
2.76	2.49835	0.739316	2.76	1.03196	3.36016
2.78	2.4367	1.36055	2.78	0.977746	3.19912
2.8	2.4061	1.06492	2.8	1.00131	3.14517
2.82	2.49541	1.09755	2.82	0.99777	3.10165
2.84	2.41524	1.77001	2.84	1.00531	3.14017
2.86	2.35498	1.21606	2.86	1.03808	2.5747
2.88	2.48732	1.42553	2.88	1.02295	2.71333
2.9	2.58604	1.54525	2.9	1.02221	2.87986
2.92	2.43202	1.30253	2.92	1.10738	2.93892
2.94	2.43259	1.55957	2.94	1.08193	2.99688
2.96	2.49326	1.43519	2.96	1.09287	2.74263
2.98	2.46988	1.57676	2.98	0.997211	2.64439
3	2.39405	1.67561	3	1.06513	2.60541
3.02	2.55982	1.2652	3.02	0.97193	2.60385
3.04	2.39945	1.73523	3.04	0.988594	2.81612
3.06	2.19911	1.58554	3.06	0.983268	2.70699
3.08	2.17631	1.64396	3.08	1.08506	2.7209
3.1	2.21698	1.87809	3.1	1.02708	2.81004
3.12	2.41575	2.14339	3.12	1.03569	2.49739
3.14	2.43797	1.97681	3.14	1.07901	2.73317
3.16	2.44172	1.91572	3.16	1.09884	2.67664
3.18	2.29934	1.61841	3.18	1.03807	2.88841
3.2	2.31665	1.73238	3.2	1.02933	3.18173
3.22	2.45569	1.7228	3.22	1.06901	3.08713
3.24	2.46222	1.12043	3.24	1.05151	3.21568
3.26	2.5489	1.07405	3.26	0.994174	3.31192
3.28	2.56298	1.60341	3.28	1.01299	3.39207
3.3	2.64836	1.59014	3.3	1.01458	3.20844
3.32	2.49232	1.1825	3.32	1.05958	3.12108
3.34	2.45475	1.46231	3.34	1.01288	3.08973
3.36	2.51174	1.37043	3.36	0.937982	3.18591
3.38	2.49718	1.49145	3.38	1.01269	2.94411
3.4	2.52929	1.25975	3.4	1.04881	2.93361
3.42	2.30259	1.21361	3.42	0.956211	3.20999
3.44	2.4597	1.54354	3.44	1.04438	2.52583
3.46	2.46	1.64408	3.46	0.999347	2.81168
3.48	2.66055	1.61139	3.48	0.987871	3.16968
3.5	2.62135	1.48831	3.5	0.995059	3.03095
3.52	2.3791	1.31913	3.52	1.02202	3.01878
3.54	2.41579	1.30723	3.54	1.01352	3.09827
3.56	2.45221	1.82129	3.56	1.04925	3.14191
3.58	2.57757	1.58156	3.58	1.06042	3.02441
3.6	2.41839	1.61512	3.6	1.09292	3.03668
3.62	2.38469	1.6498	3.62	1.03609	2.55086
3.64	2.36661	1.20986	3.64	1.07143	2.52484
3.66	2.47357	1.39764	3.66	1.06204	2.84705
3.68	2.66673	1.47997	3.68	1.10179	2.67545
3.7	2.70258	1.46623	3.7	1.0793	2.6746
3.72	2.68146	1.51738	3.72	1.07796	2.75013
3.74	2.64577	1.58857	3.74	0.986866	2.75441
3.76	2.80021	1.71593	3.76	0.933485	3.0428
3.78	2.68376	1.05117	3.78	1.01416	2.82286
3.8	2.69529	0.889658	3.8	1.01799	2.62821
3.82	2.43509	1.08948	3.82	0.98787	2.88077
3.84	2.36379	1.44439	3.84	1.06508	2.62451
3.86	2.27595	1.10423	3.86	0.976971	2.75036
3.88	2.30446	1.1726	3.88	1.05736	2.72985
3.9	2.42961	1.35873	3.9	1.05364	2.9132
3.92	2.50482	1.25953	3.92	1.02556	2.94203
3.94	2.53684	1.3097	3.94	1.08297	2.65591
3.96	2.58466	1.55565	3.96	1.03423	2.60448
3.98	2.60938	1.55474	3.98	1.05508	3.07028
4	2.51041	1.53418	4	1.03303	2.58781
4.02	2.5172	1.75589	4.02	1.11151	3.04382
4.04	2.53667	0.972749	4.04	1.07686	3.28344
4.06	2.5198	1.16278	4.06	1.07113	2.55365
4.08	2.53475	1.35232	4.08	1.04759	2.6175
4.1	2.44209	1.49042	4.1	1.08437	2.77802
4.12	2.58852	1.60854	4.12	1.03827	2.92998
4.14	2.46878	1.67797	4.14	1.03237	2.86332
4.16	2.43536	1.30803	4.16	1.00562	2.84449
4.18	2.61198	1.30869	4.18	1.04659	2.71432
4.2	2.38987	0.792603	4.2	1.07014	2.81726
4.22	2.45423	0.685539	4.22	1.02326	2.66191
4.24	2.59301	0.92479	4.24	1.07977	2.8152
4.26	2.61151	1.25227	4.26	1.03834	2.71722
4.28	2.61636	1.10726	4.28	1.00938	2.56534
4.3	2.66203	0.720634	4.3	0.970993	2.70706
4.32	2.75009	1.29021	4.32	1.00732	2.69796
4.34	2.42296	1.38048	4.34	0.944874	2.76539
4.36	2.5108	0.996116	4.36	1.03792	2.6587
4.38	2.5652	1.2815	4.38	0.977353	2.83323
4.4	2.53621	1.28292	4.4	0.968339	2.80883
4.42	2.67023	1.30165	4.42	0.941863	2.73211
4.44	2.71519	0.838712	4.44	1.00628	2.68091
4.46	2.68589	1.62024	4.46	1.07213	2.91985
4.48	2.77338	1.45714	4.48	1.05144	3.01712
4.5	2.73407	1.49608	4.5	1.1603	2.61013
4.52	2.85179	1.3573	4.52	1.04221	2.84625
4.54	2.72223	1.58418	4.54	0.995491	2.61807
4.56	2.71199	1.07609	4.56	1.10297	2.71579
4.58	2.61114	1.50005	4.58	1.05348	2.55249
4.6	2.74922	1.30078	4.6	0.961327	2.77365
4.62	2.67362	1.47322	4.62	1.02543	2.88404
4.64	2.70464	1.62603	4.64	1.01878	2.62279
4.66	2.56446	1.35743	4.66	0.963483	2.72663
4.68	2.6756	1.22398	4.68	1.06663	2.71564
4.7	2.83939	1.17097	4.7	0.985651	2.81225
4.72	2.663	1.26119	4.72	0.953132	2.58571
4.74	2.70901	1.33917	4.74	0.975284	2.61247
4.76	2.79699	1.58446	4.76	1.03986	2.83065
4.78	2.76919	1.63153	4.78	1.063	2.77138
4.8	2.66688	1.35687	4.8	1.01104	2.89614
4.82	2.58868	1.33814	4.82	1.04249	2.65482
4.84	2.50663	1.26032	4.84	1.0439	2.58469
4.86	2.59397	1.20778	4.86	1.03394	2.83417
4.88	2.77431	1.40304	4.88	1.05555	2.6053
4.9	2.66388	1.35726	4.9	1.16898	2.6651
4.92	2.71869	1.2555	4.92	1.02455	2.56426
4.94	2.70034	1.19325	4.94	1.05991	2.71504
4.96	2.70125	1.56406	4.96	1.06225	2.8721
4.98	2.66603	1.26497	4.98	0.975923	2.68525
5	2.62633	1.42933	5	0.994415	2.70739
5.02	2.7251	1.358	5.02	1.02078	2.76177
5.04	2.74431	1.13443	5.04	0.940769	2.72606
5.06	2.74909	1.36456	5.06	1.08397	2.64874
5.08	2.60503	1.34056	5.08	1.04443	2.83603
5.1	2.58264	1.01562	5.1	1.06958	2.75134
5.12	2.60308	1.69219	5.12	1.02953	2.42221
5.14	2.64971	1.87261	5.14	0.962438	2.86521
5.16	2.68237	1.67378	5.16	1.00642	2.67222
5.18	2.75939	1.70127	5.18	1.09991	2.77508
5.2	2.77625	1.25278	5.2	1.0632	2.8771
5.22	2.68122	1.71321	5.22	1.00412	2.78856
5.24	2.658	1.04789	5.24	1.10444	2.78371
5.26	2.64067	1.42988	5.26	0.989508	2.81955
5.28	2.62016	1.375	5.28	1.04111	2.74986
5.3	2.47703	1.307	5.3	0.930407	2.69829
5.32	2.58714	1.29417	5.32	1.0347	2.77931
5.34	2.67092	1.41315	5.34	0.93309	2.84662
5.36	2.49757	1.25866	5.36	1.09053	2.98621
5.38	2.56671	1.06981	5.38	1.04728	2.80004
5.4	2.78953	0.862342	5.4	1.04287	2.8159
5.42	2.80529	0.918992	5.42	1.08717	2.72754
5.44	2.82268	1.06306	5.44	1.14306	2.82695
5.46	2.86624	1.49001	5.46	1.08201	2.79089
5.48	3.01933	1.43124	5.48	1.12904	2.89474
5.5	2.86826	1.60071	5.5	1.02614	2.77629
5.52	2.74148	1.45401	5.52	1.09503	2.82586
5.54	2.56032	1.42508	5.54	1.04395	2.77197
5.56	2.60394	1.62263	5.56	1.06728	2.82489
5.58	2.4921	1.59168	5.58	1.12359	2.77597
5.6	2.60823	1.39914	5.6	1.04173	2.72446
5.62	2.46045	1.25743	5.62	1.04854	2.74937
5.64	2.53933	1.36404	5.64	1.05416	2.5835
5.66	2.51685	1.20957	5.66	1.02127	2.731
5.68	2.4614	1.21875	5.68	1.10376	2.85039
5.7	2.5225	1.4624	5.7	1.175	2.73847
5.72	2.44774	1.48859	5.72	1.03812	2.86717
5.74	2.36936	1.44896	5.74	0.955834	2.75101
5.76	2.24729	1.60447	5.76	0.928526	2.75035
5.78	2.27188	1.45838	5.78	1.01124	2.62518
5.8	2.31764	1.30558	5.8	0.979311	2.63963
5.82	2.12791	1.38447	5.82	0.961819	2.68161
5.84	2.27135	1.54789	5.84	1.0761	2.7046
5.86	2.57064	1.22089	5.86	0.988164	2.68079
5.88	2.43759	1.87016	5.88	1.1249	2.62346
5.9	2.51614	1.65369	5.9	0.988765	2.87515
5.92	2.52839	1.67831	5.92	0.952223	2.82696
5.94	2.55776	1.46314	5.94	1.01389	2.82106
5.96	2.37088	1.50628	5.96	1.00082	2.99666
5.98	2.22572	1.28784	5.98	1.05268	2.55437
6	2.36421	1.31099	6	1.00722	2.80803
6.02	2.32283	1.29165	6.02	1.00602	2.68484
6.04	2.47321	1.52923	6.04	1.11586	2.41923
6.06	2.62573	1.62485	6.06	1.09152	2.71869
6.08	2.67126	1.43521	6.08	1.02651	2.6334
6.1	2.6643	1.49569	6.1	1.01587	2.86274
6.12	2.61562	1.22986	6.12	1.06462	2.65818
6.14	2.5487	1.53498	6.14	0.996884	2.63588
6.16	2.58677	1.16999	6.16	1.03465	2.36782
6.18	2.65169	1.13598	6.18	1.01369	2.82401
6.2	2.54917	0.840275	6.2	1.06444	2.70833
6.22	2.62188	1.05413	6.22	1.01368	2.67269
6.24	2.52638	1.61936	6.24	0.962865	2.86817
6.26	2.57382	1.18227	6.26	1.04103	2.84812
6.28	2.63568	0.957835	6.28	1.06171	2.65512
6.3	2.7126	0.793601	6.3	1.09321	2.81907
6.32	2.77288	0.810574	6.32	1.03381	3.15645
6.34	2.64504	0.621238	6.34	1.04971	2.84807
6.36	2.66488	1.25915	6.36	1.16412	2.85185
6.38	2.70209	1.3915	6.38	1.15013	2.82195
6.4	2.89367	1.63822	6.4	1.17871	2.82207
6.42	2.67788	1.30631	6.42	1.08111	2.8506
6.44	2.78082	1.10144	6.44	1.06243	2.72469
6.46	2.79234	1.45702	6.46	1.07522	2.6905
6.48	2.91201	1.75087	6.48	1.07604	2.76388
6.5	2.82836	1.18106	6.5	1.06763	2.88692
6.52	2.87913	0.970444	6.52	1.06585	2.80326
6.54	2.70983	1.52338	6.54	1.135	2.90849
6.56	2.7128	1.61167	6.56	1.05835	3.22158
6.58	2.75716	1.59059	6.58	1.06376	2.63016
6.6	2.84558	1.38056	6.6	1.10923	2.68291
6.62	2.82978	1.5763	6.62	1.09613	2.99682
6.64	2.75978	1.56962	6.64	1.06341	2.772
6.66	2.77339	1.41306	6.66	1.09276	2.85016
6.68	2.77051	1.62164	6.68	1.12456	2.7798
6.7	2.68298	1.34516	6.7	1.08727	2.81245
6.72	2.71608	1.42006	6.72	1.00417	2.78124
6.74	2.81158	1.49533	6.74	0.957526	2.93615
6.76	2.77799	1.23604	6.76	1.0259	2.72083
6.78	2.93049	1.21432	6.78	1.0666	2.78091
6.8	2.76697	1.53545	6.8	1.01665	2.89724
6.82	2.66453	1.96651	6.82	1.08985	3.03975
6.84	2.81189	1.63491	6.84	1.04072	3.47737
6.86	2.70128	1.51903	6.86	1.01061	3.10005
6.88	2.92327	1.71557	6.88	1.09455	3.17744
6.9	2.96201	1.61092	6.9	1.12127	3.29107
6.92	2.96101	1.48663	6.92	1.09373	2.91616
6.94	3.01986	1.47259	6.94	1.10808	2.89671
6.96	2.87556	1.18052	6.96	1.10277	2.46212
6.98	2.94498	1.64609	6.98	0.999093	2.80372
7	2.79665	1.56338	7	1.11272	3.17432
7.02	2.72651	1.41794	7.02	1.12663	2.96068
7.04	2.64887	1.51756	7.04	1.10096	2.41911
7.06	2.79808	1.68088	7.06	1.01353	2.47027
7.08	2.89311	1.33048	7.08	1.00578	2.35214
7.1	2.8843	1.50301	7.1	1.07417	2.24255
7.12	2.85572	1.55217	7.12	1.15442	2.62924
7.14	2.69571	1.34978	7.14	1.06847	2.43436
7.16	2.69952	1.52027	7.16	1.15593	1.89985
7.18	2.65493	1.63546	7.18	0.974802	2.71205
7.2	2.68872	1.73311	7.2	0.927063	2.48652
7.22	2.66145	1.59737	7.22	1.04102	2.41117
7.24	2.60795	1.78935	7.24	1.09039	2.52848
7.26	2.54337	1.78193	7.26	1.09495	2.15595
7.28	2.4874	1.55367	7.28	1.12077	1.74586
7.3	2.62651	1.98342	7.3	1.04548	1.77971
7.32	2.66876	1.74688	7.32	1.00856	2.53185
7.34	2.66475	1.5428	7.34	1.04618	2.59841
7.36	2.60174	1.40839	7.36	1.085	2.69884
7.38	2.67978	1.78738	7.38	1.21752	2.44043
7.4	2.61446	1.52054	7.4	1.05239	2.53183
7.42	2.52167	1.76925	7.42	1.17872	2.49563
7.44	2.44995	1.42118	7.44	1.1016	2.66072
7.46	2.25504	1.69831	7.46	1.11659	2.45274
7.48	2.28435	1.63481	7.48	1.07164	2.57466
7.5	2.2919	1.38849	7.5	1.07511	2.74483
7.52	2.33686	1.90597	7.52	1.05313	2.46506
7.54	2.35963	1.67736	7.54	1.07629	2.60463
7.56	2.46265	1.38217	7.56	1.01725	2.52855
7.58	2.32323	1.51788	7.58	1.04272	2.7232
7.6	2.29791	1.90469	7.6	1.03929	2.94095
7.62	2.40804	1.78012	7.62	1.01218	2.65771
7.64	2.50948	1.52909	7.64	1.00553	2.76516
7.66	2.35551	1.83703	7.66	0.967582	2.62893
7.68	2.41516	1.40639	7.68	0.992638	2.81416
7.7	2.2762	1.59155	7.7	1.10942	2.13589
7.72	2.28877	2.0222	7.72	1.04294	2.05744
7.74	2.31215	1.83501	7.74	1.06388	2.54996
7.76	2.36388	1.44081	7.76	1.02806	2.25312
7.78	2.35636	1.83489	7.78	1.00508	2.26717
7.8	2.3457	1.5741	7.8	1.01394	2.59708
7.82	2.41291	1.50838	7.82	0.988517	2.3844
7.84	2.45824	1.63996	7.84	0.944198	2.3245
7.86	2.46354	1.60841	7.86	0.991704	2.35622
7.88	2.33236	1.44014	7.88	0.985201	2.44194
7.9	2.34792	1.61441	7.9	1.03072	2.45407
7.92	2.21598	1.80763	7.92	1.07849	2.53604
7.94	2.37934	1.56537	7.94	1.08417	2.63567
7.96	2.34114	1.59827	7.96	1.03898	2.46032
7.98	2.43826	1.81314	7.98	1.0168	2.31214
8	2.36539	1.0463	8	1.10956	2.25235
8.02	2.40491	1.5244	8.02	1.02073	2.55607
8.04	2.43893	1.64817	8.04	1.07035	2.53328
8.06	2.67771	1.39977	8.06	1.03223	2.50036
8.08	2.54095	1.61951	8.08	1.04448	2.36869
8.1	2.42442	1.23045	8.1	1.1037	2.24632
8.12	2.46566	1.48308	8.12	1.06958	1.87431
8.14	2.48247	1.40758	8.14	1.07651	2.75264
8.16	2.51308	1.55908	8.16	1.06537	2.51037
8.18	2.57069	1.18383	8.18	1.0989	2.20219
8.2	2.37487	1.45393	8.2	1.10227	2.31172
8.22	2.44281	1.60929	8.22	1.05421	2.53624
8.24	2.3272	1.1828	8.24	1.02314	2.55866
8.26	2.34541	1.26381	8.26	1.00226	1.93591
8.28	2.29795	1.51542	8.28	1.00733	2.46516
8.3	2.37677	1.451	8.3	1.05977	1.74366
8.32	2.40152	1.15359	8.32	1.0389	2.25057
8.34	2.44296	2.05355	8.34	1.06365	2.3633
8.36	2.31708	1.47424	8.36	1.02999	2.03366
8.38	2.26873	1.16772	8.38	1.06274	1.98723
8.4	2.36669	1.03865	8.4	1.13165	2.63155
8.42	2.45336	1.5721	8.42	1.03124	2.27377
8.44	2.49762	1.54739	8.44	1.10811	2.37672
8.46	2.40852	1.3593	8.46	1.12561	2.72105
8.48	2.4434	1.51231	8.48	1.14671	2.68475
8.5	2.37271	1.46645	8.5	1.10418	2.77238
8.52	2.46106	1.62148	8.52	1.05914	2.03457
8.54	2.57933	1.3977	8.54	1.01704	2.20467
8.56	2.6266	1.53169	8.56	1.07465	2.29601
8.58	2.46881	1.43516	8.58	1.10508	2.1842
8.6	2.69051	1.35415	8.6	1.18514	2.36411
8.62	2.77779	1.38368	8.62	1.06532	2.12074
8.64	2.56486	1.34248	8.64	1.0772	1.8727
8.66	2.48182	1.28234	8.66	1.10902	2.36625
8.68	2.61391	1.51584	8.68	1.12069	2.46516
8.7	2.65725	1.27749	8.7	1.12486	1.96487
8.72	2.50976	1.14785	8.72	1.11036	1.88281
8.74	2.46851	1.28292	8.74	1.05634	2.01424
8.76	2.46583	1.41306	8.76	1.09198	1.70806
8.78	2.65155	1.71481	8.78	1.0774	1.5983
8.8	2.75985	1.90083	8.8	1.16184	1.7866
8.82	2.78547	1.29279	8.82	1.13088	2.02108
8.84	2.69019	1.18417	8.84	1.14669	2.01315
8.86	2.44681	1.48552	8.86	1.0234	1.68066
8.88	2.56097	2.02467	8.88	1.10248	1.43436
8.9	2.42793	1.64899	8.9	1.06015	0.838117
8.92	2.47433	1.88224	8.92	1.10637	1.5993
8.94	2.37126	1.99608	8.94	1.1106	1.19452
8.96	2.48814	2.19244	8.96	1.13333	1.36914
8.98	2.67737	2.01486	8.98	1.12679	1.38714
9	2.65092	2.03952	9	1.12934	1.41772
9.02	2.73534	2.06501	9.02	1.13153	1.45185
9.04	2.52787	1.54779	9.04	1.10689	1.91998
9.06	2.54944	1.93055	9.06	1.02531	1.74765
9.08	2.57975	1.73339	9.08	1.16083	1.64488
9.1	2.4958	2.18953	9.1	1.05193	1.59435
9.12	2.70537	1.82989	9.12	1.03442	1.61034
9.14	2.56513	1.82635	9.14	1.12551	0.932084
9.16	2.5173	1.78862	9.16	1.02628	1.71234
9.18	2.61077	1.96442	9.18	1.11693	1.14016
9.2	2.74328	1.53641	9.2	1.19546	1.70607
9.22	2.69168	0.924135	9.22	1.10905	1.49806
9.24	2.63883	1.06614	9.24	1.10024	1.39658
9.26	2.70672	1.03311	9.26	1.0702	1.37578
9.28	2.75532	1.27971	9.28	1.13564	0.959398
9.3	2.68379	1.47349	9.3	1.08483	0.869911
9.32	2.65663	1.06104	9.32	1.03695	1.32998
9.34	2.71264	1.19408	9.34	1.05785	1.02639
9.36	2.76597	1.60615	9.36	1.16212	1.02759
9.38	2.70045	1.41421	9.38	1.11299	1.17945
9.4	2.56826	1.65956	9.4	1.23568	1.08807
9.42	2.73308	1.34875	9.42	1.21157	1.52754
9.44	2.46775	1.9189	9.44	1.25395	1.44584
9.46	2.5386	1.76628	9.46	1.1899	2.1374
9.48	2.65071	1.77192	9.48	1.24954	2.34469
9.5	2.56421	1.72887	9.5	1.20354	2.14111
9.52	2.6571	2.02652	9.52	1.23698	2.38176
9.54	2.57514	1.95463	9.54	1.1736	2.73729
9.56	2.5432	2.06035	9.56	1.19527	2.52711
9.58	2.52971	1.87279	9.58	1.16992	2.86995
9.6	2.44627	1.57835	9.6	1.15439	2.58497
9.62	2.53582	1.5278	9.62	1.14823	2.39999
9.64	2.47299	1.72093	9.64	1.14392	2.60326
9.66	2.45134	1.94665	9.66	1.07796	2.48664
9.68	2.5105	1.82162	9.68	1.16109	2.75307
9.7	2.49585	1.88742	9.7	1.17387	2.75466
9.72	2.4251	1.80587	9.72	1.10667	1.55572
9.74	2.40447	1.60582	9.74	1.17685	1.52231
9.76	2.32101	1.61047	9.76	1.10766	2.33021
9.78	2.3543	1.85652	9.78	1.04841	1.95715
9.8	2.37089	1.58746	9.8	1.04353	2.85955
9.82	2.27787	1.81813	9.82	1.05282	2.16826
9.84	2.26923	1.36913	9.84	1.13782	1.76908
9.86	2.42706	1.74619	9.86	1.15651	2.08853
9.88	2.42154	1.75249	9.88	1.12956	1.79003
9.9	2.55426	1.80596	9.9	1.06321	2.04066
9.92	2.42565	1.84352	9.92	1.03571	2.45447
9.94	2.32759	1.80181	9.94	1.06689	2.06045
9.96	2.47028	1.54214	9.96	1.14839	2.17675
9.98	2.3763	1.61663	9.98	1.13702	1.15961
10	2.45879	1.85581	10	1.13	1.9994
10.02	2.426	1.66855	10.02	1.18727	2.0129
10.04	2.44878	1.40687	10.04	1.16999	1.99429
10.06	2.34918	1.25879	10.06	1.0756	2.4325
10.08	2.14281	1.62442	10.08	1.18094	1.99784
10.1	2.20877	1.76947	10.1	1.14503	1.82362
10.12	2.3617	2.01105	10.12	1.10616	1.93445
10.14	2.37156	2.03216	10.14	1.01402	1.5542
10.16	2.42077	1.91829	10.16	1.08562	1.30811
10.18	2.27415	1.88925	10.18	1.05502	1.4577
10.2	2.27715	1.8945	10.2	1.06454	0.951322
10.22	2.29672	1.74367	10.22	1.06137	1.01925
10.24	2.34863	1.67534	10.24	1.08459	1.08362
10.26	2.32321	1.39874	10.26	1.0927	1.2508
10.28	2.34366	1.30204	10.28	1.05637	1.43289
10.3	2.4933	1.50101	10.3	1.10767	2.11338
10.32	2.39373	1.52794	10.32	1.13907	2.22438
10.34	2.39141	1.42243	10.34	1.15069	2.17232
10.36	2.4344	1.18674	10.36	1.05787	2.73922
10.38	2.38901	1.38267	10.38	1.10345	2.75951
10.4	2.36146	1.07471	10.4	1.12983	1.85737
10.42	2.39236	1.111	10.42	1.13453	2.02779
10.44	2.52645	1.24227	10.44	1.11911	2.7379
10.46	2.56848	1.32355	10.46	1.03253	2.28961
10.48	2.50254	1.14274	10.48	1.10631	2.51051
10.5	2.43148	1.30185	10.5	1.05034	2.44138
10.52	2.46161	1.20289	10.52	1.14258	2.22478
10.54	2.50751	1.4411	10.54	1.07058	2.41209
10.56	2.48696	1.45808	10.56	1.1057	1.84946
10.58	2.51236	1.70409	10.58	1.14091	2.00826
10.6	2.51442	1.71078	10.6	1.18629	2.074
10.62	2.57857	1.58338	10.62	1.08602	2.43562
10.64	2.60821	1.59542	10.64	1.11818	2.99103
10.66	2.45404	1.60338	10.66	1.02651	3.14978
10.68	2.41378	1.46714	10.68	1.16012	2.65471
10.7	2.65981	1.53477	10.7	1.1575	2.96036
10.72	2.62605	1.21952	10.72	1.12994	3.73751
10.74	2.611	0.843258	10.74	1.09519	3.48538
10.76	2.7087	0.874223	10.76	1.15689	3.68601
10.78	2.55905	1.2029	10.78	1.24111	3.61645
10.8	2.43594	1.36726	10.8	1.22191	3.53579
10.82	2.55908	1.50861	10.82	1.15014	3.51523
10.84	2.60754	1.27157	10.84	1.14691	3.48789
10.86	2.51685	1.12244	10.86	1.09163	3.55407
10.88	2.3843	1.62427	10.88	1.12677	3.72137
10.9	2.34948	2.15386	10.9	1.20433	3.55797
10.92	2.41489	1.69832	10.92	1.17616	3.56725
10.94	2.44177	1.67542	10.94	1.11583	3.66369
10.96	2.50303	1.42704	10.96	1.12549	3.53812
10.98	2.55154	1.84675	10.98	1.10647	3.72621
11	2.5112	1.6132	11	1.21045	3.51095
11.02	2.36455	1.63928	11.02	1.21125	3.39552
11.04	2.39513	1.75434	11.04	1.04559	3.45674
11.06	2.52317	1.60091	11.06	1.12228	3.2205
11.08	2.37126	1.19801	11.08	1.15828	3.46179
11.1	2.36564	1.73893	11.1	1.12023	3.29395
11.12	2.43108	1.17967	11.12	1.09282	3.38624
11.14	2.36341	1.89653	11.14	1.07584	3.341
11.16	2.34043	1.50764	11.16	1.11092	3.33556
11.18	2.45336	0.928658	11.18	1.17945	3.79761
11.2	2.35879	1.20004	11.2	1.19997	3.5756
11.22	2.32018	1.06993	11.22	1.15524	3.72715
11.24	2.31563	1.34524	11.24	1.17317	3.7371
11.26	2.43411	1.39439	11.26	1.11768	3.37465
11.28	2.50419	1.37947	11.28	1.15274	2.67891
11.3	2.3828	1.50091	11.3	1.09754	3.24592
11.32	2.28052	1.56635	11.32	1.15168	3.51939
11.34	2.33549	1.42814	11.34	1.11949	3.35374
11.36	2.28672	1.33131	11.36	1.1206	3.27062
11.38	2.45059	1.27467	11.38	1.15991	2.99297
11.4	2.39157	1.45919	11.4	1.23862	3.07394
11.42	2.44157	1.46345	11.42	1.16222	3.1399
11.44	2.60215	1.57187	11.44	1.2262	3.22023
11.46	2.63223	1.26366	11.46	1.21656	3.68794
11.48	2.63689	1.46797	11.48	1.14023	3.63721
11.5	2.58655	1.72188	11.5	1.13692	3.72721
11.52	2.59145	1.45608	11.52	1.1743	3.39585
11.54	2.61295	1.35459	11.54	1.14571	3.87873
11.56	2.72825	1.21115	11.56	1.16737	3.70576
11.58	2.95294	1.35285	11.58	1.30323	3.59926
11.6	2.93625	1.44932	11.6	1.24629	3.69534
11.62	2.76086	1.31337	11.62	1.18201	3.27638
11.64	2.6669	1.4253	11.64	1.24331	3.57899
11.66	2.49199	1.25229	11.66	1.20849	3.45996
11.68	2.70669	1.42247	11.68	1.19171	3.16455
11.7	2.80557	1.49125	11.7	1.23538	3.13317
11.72	2.86669	1.11932	11.72	1.2667	3.66002
11.74	2.72306	1.39813	11.74	1.23044	3.35214
11.76	2.69884	1.44113	11.76	1.25597	3.25434
11.78	2.86008	1.40829	11.78	1.33567	3.32896
11.8	2.86751	1.43857	11.8	1.24546	3.07561
11.82	2.87334	1.58144	11.82	1.33506	3.65845
11.84	2.8566	1.24435	11.84	1.1951	3.21255
11.86	3.0144	1.71812	11.86	1.25842	3.57064
11.88	2.8589	1.48589	11.88	1.30329	3.56344
11.9	2.97289	1.67005	11.9	1.39564	3.16014
11.92	2.927	1.50753	11.92	1.25013	3.84424
11.94	2.86758	1.55247	11.94	1.29967	3.8105
11.96	2.82911	1.22946	11.96	1.21495	3.82431
11.98	2.68327	1.4934	11.98	1.32816	3.71435
12	3.03823	1.30312	12	1.27954	3.68338
12.02	2.77549	0.992646	12.02	1.23461	3.7776
12.04	2.79734	0.965802	12.04	1.24768	3.61914
12.06	2.62741	1.10174	12.06	1.26744	3.74667
12.08	2.64026	1.31799	12.08	1.28418	3.52642
12.1	2.68306	1.24212	12.1	1.23856	3.52685
12.12	2.59725	1.40344	12.12	1.27139	3.88096
12.14	2.45457	1.13845	12.14	1.28825	3.76614
12.16	2.44287	1.40252	12.16	1.26891	3.62995
12.18	2.35802	1.3383	12.18	1.28747	3.53337
12.2	2.33552	1.18065	12.2	1.29186	3.62069
12.22	2.30669	0.89844	12.22	1.28822	3.6513
12.24	2.29244	0.882616	12.24	1.33021	3.69032
12.26	2.36803	1.21471	12.26	1.22314	3.58313
12.28	2.46365	1.68233	12.28	1.29257	3.52231
12.3	2.37672	1.57203	12.3	1.26799	3.49696
12.32	2.33777	1.85844	12.32	1.25142	3.73505
12.34	2.4812	1.66083	12.34	1.29364	3.66921
12.36	2.46506	0.852046	12.36	1.32449	3.5893
12.38	2.35568	0.918297	12.38	1.22077	3.55352
12.4	2.31101	0.921409	12.4	1.21572	3.54974
12.42	2.38865	1.34554	12.42	1.27657	3.68083
12.44	2.20098	1.44743	12.44	1.18251	3.28082
12.46	2.08464	1.53445	12.46	1.19022	3.37218
12.48	2.21667	1.45221	12.48	1.21727	3.18169
12.5	2.14639	1.28785	12.5	1.19906	2.89151
12.52	2.24846	1.04999	12.52	1.21593	3.13427
12.54	2.18718	1.22634	12.54	1.23653	3.65146
12.56	2.25312	1.00309	12.56	1.24721	3.62483
12.58	2.26722	0.785958	12.58	1.38082	3.54152
12.6	2.22139	1.07682	12.6	1.19578	3.59149
12.62	2.27155	1.38467	12.62	1.30741	3.77655
12.64	2.36213	1.41977	12.64	1.27132	3.63028
12.66	2.56228	1.39928	12.66	1.24694	3.55282
12.68	2.45186	1.30398	12.68	1.25284	3.49537
12.7	2.47473	1.25435	12.7	1.28129	3.56449
12.72	2.34096	1.29818	12.72	1.20735	3.60506
12.74	2.47747	1.24232	12.74	1.23892	3.55013
12.76	2.40718	1.24208	12.76	1.27919	3.87757
12.78	2.24128	1.40478	12.78	1.16269	3.68144
12.8	2.21888	1.36346	12.8	1.21067	3.36342
12.82	2.28535	1.60833	12.82	1.206	3.66773
12.84	2.35889	1.52705	12.84	1.19672	3.49393
12.86	2.38129	1.14184	12.86	1.20378	3.72692
12.88	2.34545	1.30446	12.88	1.19354	3.63795
12.9	2.46877	0.885662	12.9	1.19801	3.46936
12.92	2.66921	1.22362	12.92	1.18384	3.28572
12.94	2.41207	0.861377	12.94	1.23998	3.77115
12.96	2.40618	0.852191	12.96	1.28639	3.24938
12.98	2.55733	0.960217	12.98	1.29395	3.26373
13	2.45152	1.20576	13	1.21757	3.76213
13.02	2.57327	1.0462	13.02	1.30628	3.34511
13.04	2.48429	1.06863	13.04	1.22858	3.63151
13.06	2.50113	1.19778	13.06	1.19888	3.61312
13.08	2.53936	1.38715	13.08	1.24052	3.36004
13.1	2.46105	1.26766	13.1	1.29795	3.40557
13.12	2.35008	1.01171	13.12	1.33571	3.53773
13.14	2.29438	1.48599	13.14	1.26341	3.46859
13.16	2.34584	1.30862	13.16	1.33537	3.23033
13.18	2.35027	1.24811	13.18	1.28494	3.7714
13.2	2.35844	1.152	13.2	1.31777	3.39385
13.22	2.51083	1.11165	13.22	1.26885	3.26772
13.24	2.44251	1.04277	13.24	1.3118	3.26851
13.26	2.49253	0.864911	13.26	1.3232	3.55507
13.28	2.60188	1.30818	13.28	1.36787	3.51129
13.3	2.57829	1.37192	13.3	1.34052	3.58424
13.32	2.50146	1.11491	13.32	1.34473	3.56341
13.34	2.44717	1.08966	13.34	1.2683	3.84607
13.36	2.26697	1.09233	13.36	1.39659	3.58776
13.38	2.29835	1.14296	13.38	1.25754	3.24412
13.4	2.31572	1.24256	13.4	1.246	3.38608
13.42	2.13607	1.21973	13.42	1.21496	3.00083
13.44	2.2701	1.33872	13.44	1.27637	3.41791
13.46	2.19223	1.28119	13.46	1.39945	3.49101
13.48	2.22053	1.18509	13.48	1.31652	3.92361
13.5	2.22671	1.42959	13.5	1.31947	3.84471
13.52	2.26763	1.28333	13.52	1.38096	3.73017
13.54	2.33707	1.40332	13.54	1.27197	3.62322
13.56	2.34752	1.24585	13.56	1.33152	3.73948
13.58	2.39474	1.40451	13.58	1.32773	3.8318
13.6	2.53203	1.30759	13.6	1.34717	3.64594
13.62	2.33905	1.56829	13.62	1.42205	3.64501
13.64	2.3613	1.41565	13.64	1.24632	3.68363
13.66	2.36783	1.31067	13.66	1.25197	3.67622
13.68	2.33924	1.24269	13.68	1.30041	3.45942
13.7	2.39825	1.4762	13.7	1.44643	3.8917
13.72	2.29885	1.17002	13.72	1.35446	3.9062
13.74	2.35611	1.27194	13.74	1.36833	3.46517
13.76	2.28705	1.411	13.76	1.35446	3.52435
13.78	2.41171	1.19169	13.78	1.36235	3.44062
13.8	2.3147	1.29869	13.8	1.39547	3.63765
13.82	2.56834	1.21413	13.82	1.36512	3.59682
13.84	2.36639	0.897155	13.84	1.359	3.59676
13.86	2.45406	1.16015	13.86	1.30918	3.59183
13.88	2.28487	1.53347	13.88	1.4034	3.51695
13.9	2.39603	0.939229	13.9	1.38362	2.9595
13.92	2.51174	1.25212	13.92	1.30702	3.72163
13.94	2.55881	2.16005	13.94	1.25319	4.00106
13.96	2.55272	2.07802	13.96	1.22417	3.68776
13.98	2.66026	2.73483	13.98	1.38574	3.82736
14	2.62572	2.66951	14	1.36961	3.52178
14.02	2.30644	2.57134	14.02	1.3855	2.62856
14.04	2.24845	2.59494	14.04	1.29175	3.49476
14.06	2.21446	2.81446	14.06	1.38735	3.76498
14.08	2.1654	2.80166	14.08	1.32495	3.77097
14.1	2.13192	2.3947	14.1	1.33285	3.72056
14.12	2.20461	2.62782	14.12	1.37081	3.62828
14.14	2.11984	2.17296	14.14	1.34865	3.5959
14.16	2.13755	2.38384	14.16	1.41148	3.63323
14.18	2.22342	2.25804	14.18	1.40034	3.45768
14.2	2.12484	3.10964	14.2	1.39241	3.25375
14.22	2.04821	3.00052	14.22	1.43952	3.31668
14.24	2.19171	2.82927	14.24	1.5328	2.98979
14.26	2.28246	2.91525	14.26	1.33504	2.77611
14.28	2.19382	3.1573	14.28	1.4153	3.70889
14.3	2.13675	2.83769	14.3	1.45814	2.70839
14.32	2.1171	2.78084	14.32	1.40952	2.55427
14.34	2.14585	3.07725	14.34	1.41752	2.42407
14.36	2.1792	2.98417	14.36	1.50731	3.10548
14.38	2.10298	2.92202	14.38	1.34806	2.8395
14.4	2.17949	2.93872	14.4	1.42795	3.16371
14.42	2.31928	3.01666	14.42	1.36548	2.88683
14.44	2.20164	2.91075	14.44	1.40081	2.97167
14.46	2.22755	2.88425	14.46	1.41011	2.6931
14.48	2.13172	3.02256	14.48	1.48379	3.18502
14.5	2.28878	3.19983	14.5	1.4894	2.7136
14.52	2.20841	2.85922	14.52	1.46871	2.66398
14.54	2.21969	2.87982	14.54	1.56241	2.88228
14.56	2.22486	2.87733	14.56	1.45732	3.19688
14.58	2.21464	2.89863	14.58	1.44144	2.82452
14.6	2.26139	3.07282	14.6	1.52372	2.40863
14.62	2.33813	2.97174	14.62	1.4467	3.206
14.64	2.38116	3.13449	14.64	1.49319	2.88946
14.66	2.31367	2.85971	14.66	1.50694	3.10213
14.68	2.52194	3.12766	14.68	1.26166	2.83662
14.7	2.4291	3.18956	14.7	1.28269	2.66773
14.72	2.60448	3.34189	14.72	1.39377	2.77317
14.74	2.75052	3.16379	14.74	1.33117	3.08295
14.76	2.87185	2.94069	14.76	1.32992	3.14651
14.78	3.00899	3.01049	14.78	1.43487	2.95885
14.8	2.9786	2.95139	14.8	1.35568	3.07526
14.82	2.76843	2.89623	14.82	1.40313	3.6456
14.84	2.82717	3.08793	14.84	1.42257	3.51251
14.86	2.90091	2.92249	14.86	1.41906	3.10084
14.88	2.93956	3.16343	14.88	1.37026	2.5892
14.9	3.02138	3.14708	14.9	1.36585	2.72476
14.92	2.8523	3.23411	14.92	1.41406	2.69439
14.94	3.05452	3.16749	14.94	1.34354	3.47844
14.96	2.76434	3.2175	14.96	1.35832	3.15305
14.98	2.78897	3.36701	14.98	1.3896	3.3769
15	2.76476	3.36162	15	1.40536	3.61482
15.02	2.71808	3.29542	15.02	1.38072	3.5261
15.04	2.76121	3.20756	15.04	1.37544	3.73285
15.06	2.84399	3.25795	15.06	1.46531	3.67327
15.08	2.80832	3.30523	15.08	1.51591	3.69914
15.1	2.63772	3.2438	15.1	1.44149	3.55956
15.12	2.63603	2.99523	15.12	1.54008	3.39485
15.14	2.6174	2.93052	15.14	1.51645	3.59437
15.16	2.5051	2.99275	15.16	1.53623	3.49587
15.18	2.5947	2.64953	15.18	1.42803	3.6708
15.2	2.5215	2.92929	15.2	1.41847	3.60854
15.22	2.55507	2.5972	15.22	1.48409	3.59714
15.24	2.5024	2.68794	15.24	1.47318	3.60077
15.26	2.4446	2.18865	15.26	1.48214	3.69402
15.28	2.47085	2.58759	15.28	1.45902	3.41817
15.3	2.62787	2.75697	15.3	1.52043	3.30775
15.32	2.64622	2.62072	15.32	1.44917	3.27896
15.34	2.74959	1.95052	15.34	1.36619	3.31593
15.36	2.71959	2.71118	15.36	1.33885	3.0368
15.38	2.69868	2.61153	15.38	1.40812	3.0835
15.4	2.49204	2.69589	15.4	1.41943	3.17834
15.42	2.67462	2.78622	15.42	1.36405	3.37848
15.44	2.62874	2.85589	15.44	1.3774	3.56466
15.46	2.60092	2.50246	15.46	1.38554	3.69552
15.48	2.5719	2.70162	15.48	1.40287	2.7897
15.5	2.46182	2.85742	15.5	1.37602	3.13444
15.52	2.39747	2.88223	15.52	1.41793	2.30554
15.54	2.23655	2.66467	15.54	1.41373	1.61472
15.56	2.4177	2.75901	15.56	1.32914	1.38101
15.58	2.45481	2.99598	15.58	1.42394	1.72262
15.6	2.50445	3.00309	15.6	1.37206	1.43142
15.62	2.39192	2.93731	15.62	1.36452	1.13048
15.64	2.48857	2.67911	15.64	1.3734	1.28338
15.66	2.45882	2.94871	15.66	1.40066	1.32506
15.68	2.40345	3.05303	15.68	1.4954	1.25856
15.7	2.60487	3.24826	15.7	1.32033	1.51487
15.72	2.72819	3.27227	15.72	1.34406	1.56804
15.74	2.80137	3.21803	15.74	1.42461	2.33779
15.76	2.70288	3.19738	15.76	1.40225	2.68267
15.78	2.53825	3.25574	15.78	1.40642	2.57054
15.8	2.54686	3.24952	15.8	1.41553	2.97091
15.82	2.55412	3.24367	15.82	1.37438	3.15683
15.84	2.64322	2.8335	15.84	1.35259	3.22033
15.86	2.55802	3.24905	15.86	1.36756	3.08177
15.88	2.45112	3.18627	15.88	1.24211	3.03439
15.9	2.42189	3.31884	15.9	1.2278	3.23472
15.92	2.51798	3.17538	15.92	1.27932	2.906
15.94	2.47556	3.25648	15.94	1.35985	2.59596
15.96	2.58008	3.29755	15.96	1.2641	2.6904
15.98	2.59785	3.31632	15.98	1.28849	1.872
16	2.46691	3.23461	16	1.24613	1.60669
16.02	2.70944	3.26199	16.02	1.27637	1.6284
16.04	2.96735	3.20468	16.04	1.22037	2.23603
16.06	2.96374	3.13838	16.06	1.21829	2.50374
16.08	2.91009	3.2462	16.08	1.35649	2.14118
16.1	3.06065	3.27242	16.1	1.2405	2.63913
16.12	2.89735	3.09566	16.12	1.37923	1.47425
16.14	2.87831	3.2627	16.14	1.35622	1.73176
16.16	3.10374	3.17804	16.16	1.37018	1.46906
16.18	2.93309	2.92399	16.18	1.2848	1.1879
16.2	2.87628	3.07408	16.2	1.31922	1.0561
16.22	2.813	3.14306	16.22	1.278	1.24971
16.24	2.8481	3.18193	16.24	1.30711	1.55523
16.26	2.84458	3.20915	16.26	1.33444	1.5127
16.28	2.87485	3.30536	16.28	1.33277	2.23959
16.3	2.73897	3.40395	16.3	1.26082	2.73169
16.32	2.75013	3.37117	16.32	1.23719	2.64452
16.34	2.66668	3.3562	16.34	1.29258	2.7399
16.36	2.58184	3.30617	16.36	1.22107	2.74372
16.38	2.6007	3.23344	16.38	1.22168	2.55823
16.4	2.60672	3.24513	16.4	1.31107	2.80076
16.42	2.57854	3.51891	16.42	1.20834	2.83387
16.44	2.6181	3.47894	16.44	1.38751	2.92434
16.46	2.69107	3.21384	16.46	1.29206	2.70228
16.48	2.74335	3.172	16.48	1.33753	2.79678
16.5	2.71833	3.11904	16.5	1.34635	2.71378
16.52	2.71544	3.36197	16.52	1.2864	2.42211
16.54	2.78799	3.33667	16.54	1.30419	2.62361
16.56	2.60578	3.49373	16.56	1.32623	2.68965
16.58	2.61206	3.53425	16.58	1.34227	2.83915
16.6	2.42178	3.29176	16.6	1.21794	2.79378
16.62	2.44464	3.1463	16.62	1.22808	3.09501
16.64	2.59798	3.17725	16.64	1.22272	2.59715
16.66	2.7676	3.043	16.66	1.27027	3.11318
16.68	2.82547	2.95105	16.68	1.33506	2.75769
16.7	3.02181	3.10026	16.7	1.24237	2.91472
16.72	3.01032	3.26375	16.72	1.36748	2.71498
16.74	2.98337	3.20858	16.74	1.27228	2.17668
16.76	3.01953	3.26174	16.76	1.40957	2.38765
16.78	2.91585	3.23866	16.78	1.45584	2.71383
16.8	2.89008	3.22201	16.8	1.34212	2.16718
16.82	2.99459	2.83434	16.82	1.34668	2.32336
16.84	3.11665	2.77003	16.84	1.36505	2.57748
16.86	2.9953	3.03861	16.86	1.36841	2.35884
16.88	3.04202	3.28131	16.88	1.28572	2.54146
16.9	3.16276	3.45214	16.9	1.25686	2.42609
16.92	3.125	3.0436	16.92	1.32313	2.78286
16.94	3.21655	2.93583	16.94	1.26156	2.95387
16.96	3.09597	2.94154	16.96	1.34109	2.49732
16.98	2.94546	2.70635	16.98	1.37959	2.12843
17	3.02444	2.62067	17	1.34252	2.56061
17.02	2.81463	2.66594	17.02	1.56256	2.11965
17.04	2.90064	3.14906	17.04	1.56915	1.96948
17.06	2.76616	3.33562	17.06	1.56641	2.41755
17.08	2.75904	3.49815	17.08	1.50872	2.51427
17.1	2.73289	3.36654	17.1	1.44976	2.89011
17.12	2.76992	3.33465	17.12	1.47436	2.61492
17.14	2.68782	3.41975	17.14	1.464	1.98706
17.16	2.77853	3.33569	17.16	1.42656	2.21961
17.18	2.69657	3.44224	17.18	1.41911	2.76567
17.2	2.83141	3.30476	17.2	1.34508	2.5244
17.22	2.77013	3.37472	17.22	1.3751	2.14876
17.24	2.55387	3.34901	17.24	1.40434	2.81439
17.26	2.59399	3.20751	17.26	1.44156	2.1163
17.28	2.57934	3.43221	17.28	1.47745	2.50254
17.3	2.63575	3.35523	17.3	1.48083	2.41001
17.32	2.59458	2.61841	17.32	1.39879	2.45032
17.34	2.42478	2.95788	17.34	1.41123	2.40705
17.36	2.35822	2.89501	17.36	1.37338	2.58828
17.38	2.4701	3.03754	17.38	1.40497	2.72927
17.4	2.48782	2.88525	17.4	1.42092	1.98701
17.42	2.73368	2.9472	17.42	1.39437	1.73073
17.44	2.86637	3.13563	17.44	1.41696	1.4842
17.46	2.48121	2.73682	17.46	1.40358	1.9481
17.48	2.51674	2.77427	17.48	1.50572	2.2099
17.5	2.57593	2.82109	17.5	1.51668	2.28156
17.52	2.45867	3.16967	17.52	1.49611	2.30774
17.54	2.55152	3.47071	17.54	1.48392	2.19029
17.56	2.38823	3.24831	17.56	1.44725	2.28002
17.58	2.53888	3.44778	17.58	1.57757	2.33479
17.6	2.51535	3.36002	17.6	1.41552	2.39443
17.62	2.55349	3.56238	17.62	1.43455	2.60938
17.64	2.58068	3.49716	17.64	1.44181	2.75368
17.66	2.52107	3.31403	17.66	1.49562	2.86087
17.68	2.66533	3.44464	17.68	1.39662	3.057
17.7	2.71746	3.44815	17.7	1.3898	2.80415
17.72	2.87951	3.42579	17.72	1.59312	2.59136
17.74	2.75676	3.36876	17.74	1.44455	2.75063
17.76	2.87224	3.26384	17.76	1.42965	2.75957
17.78	2.77895	3.28753	17.78	1.44428	3.04146
17.8	2.81712	3.02064	17.8	1.2984	2.83371
17.82	2.71605	3.01607	17.82	1.39736	2.91161
17.84	2.79736	3.20507	17.84	1.35053	2.66266
17.86	3.03412	3.15113	17.86	1.44098	2.40116
17.88	3.02117	3.13955	17.88	1.44507	2.34108
17.9	2.94617	3.17945	17.9	1.36546	2.60355
17.92	2.93567	3.07124	17.92	1.39104	2.60093
17.94	2.8608	3.37331	17.94	1.51509	2.70057
17.96	2.74484	3.42605	17.96	1.67905	2.43359
17.98	2.91031	3.5544	17.98	1.5651	2.73428
18	2.74669	3.33807	18	1.55625	2.56957
18.02	2.69853	3.47061	18.02	1.49655	2.41981
18.04	2.52473	3.57249	18.04	1.55997	2.31114
18.06	2.63255	3.41738	18.06	1.58747	2.20068
18.08	2.70502	3.50691	18.08	1.49961	2.2004
18.1	2.81095	3.36492	18.1	1.52868	2.27776
18.12	2.89977	3.42018	18.12	1.45724	2.33762
18.14	2.85989	3.22581	18.14	1.42984	2.01485
18.16	2.89119	3.29434	18.16	1.44712	1.79902
18.18	2.93578	3.30847	18.18	1.50138	2.35635
18.2	2.93323	3.27448	18.2	1.53416	1.90996
18.22	3.00054	3.31333	18.22	1.64967	2.0394
18.24	3.05378	3.32455	18.24	1.65032	1.98738
18.26	3.13955	3.38642	18.26	1.63092	2.22293
18.28	3.22493	3.47214	18.28	1.65887	2.17719
18.3	3.15421	3.36139	18.3	1.60212	2.16995
18.32	3.49311	3.33537	18.32	1.53971	2.29598
18.34	3.38224	3.39445	18.34	1.61984	2.14589
18.36	3.1753	3.28134	18.36	1.60869	2.24407
18.38	3.34376	2.98519	18.38	1.60205	2.43047
18.4	3.2002	2.77539	18.4	1.47967	2.07884
18.42	3.20583	2.67434	18.42	1.53289	2.11204
18.44	3.23048	2.73087	18.44	1.53456	2.1998
18.46	3.0988	2.77334	18.46	1.56324	2.0992
18.48	3.08972	2.61371	18.48	1.58768	1.94442
18.5	3.05757	3.08947	18.5	1.60942	2.06479
18.52	2.97636	3.44154	18.52	1.57912	2.11565
18.54	3.0658	3.32977	18.54	1.57677	2.31784
18.56	3.00004	3.42264	18.56	1.50313	2.40383
18.58	2.96301	3.36297	18.58	1.59033	2.22646
18.6	2.85101	3.46718	18.6	1.55562	2.04484
18.62	2.76825	3.53464	18.62	1.63801	2.38886
18.64	2.85086	3.43824	18.64	1.55268	2.29451
18.66	2.70747	3.4808	18.66	1.59582	1.93714
18.68	2.46327	3.43553	18.68	1.72054	2.2177
18.7	2.29893	3.25772	18.7	1.64582	2.22054
18.72	2.32338	3.34629	18.72	1.7864	2.2989
18.74	2.30183	2.88335	18.74	1.66411	2.2587
18.76	2.39565	2.90168	18.76	1.78951	2.30971
18.78	2.31908	2.95884	18.78	1.77347	2.36621
18.8	2.36055	2.57627	18.8	1.7374	2.19203
18.82	2.42206	2.64243	18.82	1.70279	2.07167
18.84	2.4865	2.49405	18.84	1.69047	2.14495
18.86	2.60622	3.28778	18.86	1.69007	2.30152
18.88	2.6688	3.27593	18.88	1.59423	2.1358
18.9	2.57765	3.2112	18.9	1.64632	1.97617
18.92	2.73428	3.03864	18.92	1.57652	1.9375
18.94	2.77415	3.18977	18.94	1.53329	1.83803
18.96	2.84239	3.15643	18.96	1.58678	2.20594
18.98	2.74704	3.51113	18.98	1.39974	1.9232
19	2.61877	3.33404	19	1.40346	2.20088
19.02	2.69256	3.26452	19.02	1.55003	2.15773
19.04	2.65717	3.33903	19.04	1.45526	2.00716
19.06	2.64565	3.48727	19.06	1.49164	2.10051
19.08	3.00893	3.41783	19.08	1.49415	1.62966
19.1	3.00786	3.4954	19.1	1.65451	1.571
19.12	3.11434	3.33167	19.12	1.47673	1.60584
19.14	3.29322	3.45983	19.14	1.50097	1.71198
19.16	3.32249	3.18744	19.16	1.5022	1.80239
19.18	3.25688	3.27657	19.18	1.58401	2.28391
19.2	3.15347	3.4464	19.2	1.48558	1.85837
19.22	3.22375	3.14519	19.22	1.5499	2.00738
19.24	3.28063	3.25131	19.24	1.60161	1.81386
19.26	3.33898	3.53959	19.26	1.60072	1.94973
19.28	3.19279	3.41701	19.28	1.69281	1.81947
19.3	3.24461	3.33685	19.3	1.60516	1.67815
19.32	3.53446	3.3376	19.32	1.66496	1.33255
19.34	3.78964	3.43309	19.34	1.57222	1.45913
19.36	3.63849	3.42769	19.36	1.59529	1.94977
19.38	3.62251	3.24028	19.38	1.58261	1.96117
19.4	3.58807	3.37805	19.4	1.64704	1.93011
19.42	3.56293	2.93508	19.42	1.65119	2.3393
19.44	3.89716	3.04611	19.44	1.82717	2.35664
19.46	3.91796	3.02313	19.46	1.76934	2.63884
19.48	3.76874	2.99595	19.48	1.70218	2.56601
19.5	3.82589	3.03026	19.5	1.68467	2.22693
19.52	3.72299	3.21639	19.52	1.72411	2.72268
19.54	3.32895	2.87166	19.54	1.78318	2.52916
19.56	3.31947	2.87124	19.56	1.61117	2.28122
19.58	3.24701	2.64477	19.58	1.69166	2.17947
19.6	3.33299	2.39453	19.6	1.81418	2.25885
19.62	3.20378	2.41	19.62	1.75071	2.38094
19.64	3.3524	2.49282	19.64	1.96108	2.39174
19.66	3.51346	2.54128	19.66	1.7863	2.20189
19.68	3.28767	3.09001	19.68	1.6817	2.37345
19.7	3.30629	2.70374	19.7	1.68213	1.67479
19.72	3.23884	2.84159	19.72	1.65847	1.567
19.74	3.29724	3.0318	19.74	1.66571	1.79838
19.76	3.38768	2.81163	19.76	1.86463	2.12715
19.78	3.5055	2.97745	19.78	1.83384	2.28572
19.8	3.67575	2.77165	19.8	1.84484	1.94734
19.82	3.86697	2.9386	19.82	1.76438	2.53224
19.84	3.96105	2.77613	19.84	1.78706	1.98342
19.86	4.01039	2.82441	19.86	1.69305	1.62446
19.88	3.91488	2.81397	19.88	1.61692	1.59974
19.9	3.98355	2.9531	19.9	1.62136	1.90607
19.92	3.97989	2.81765	19.92	1.88616	1.77052
19.94	4.00649	2.55641	19.94	1.706	2.00945
19.96	4.22137	2.19198	19.96	1.59888	1.49435
19.98	4.45575	1.93834	19.98	1.58164	1.62229
20	4.24556	2.01218	20	1.6934	1.45012
20.02	4.37822	2.49545	20.02	1.63147	1.4285
20.04	4.28578	1.96774	20.04	1.72351	1.42924
20.06	4.3755	2.6719	20.06	1.67943	1.43791
20.08	4.37818	2.27457	20.08	1.51714	1.62643
20.1	4.15793	2.30108	20.1	1.60947	1.73618
20.12	4.08082	2.3889	20.12	1.73392	1.62333
20.14	3.97637	2.50043	20.14	1.68738	1.57113
20.16	4.06606	2.66909	20.16	1.75153	1.48237
20.18	3.93072	2.82639	20.18	1.63782	1.29494
20.2	3.67969	2.75051	20.2	1.66484	2.10805
20.22	3.6626	3.05365	20.22	1.72383	1.74972
20.24	3.41947	3.21828	20.24	1.61339	1.72124
20.26	3.39997	3.06576	20.26	1.53378	1.85213
20.28	3.27705	2.96439	20.28	1.66658	1.94557
20.3	3.25207	3.02475	20.3	1.64408	2.2838
20.32	3.32627	3.24551	20.32	1.81493	1.99493
20.34	3.42838	3.04319	20.34	1.62524	2.27422
20.36	3.34898	2.94248	20.36	1.64278	2.13058
20.38	3.52323	3.0692	20.38	1.61738	1.94544
20.4	3.41953	2.61831	20.4	1.63924	2.288
20.42	3.57263	2.88183	20.42	1.73399	2.03855
20.44	3.67916	3.10429	20.44	1.67777	2.11657
20.46	3.50745	3.06385	20.46	1.71027	1.94606
20.48	3.59765	3.22844	20.48	1.62048	2.15177
20.5	3.72342	3.31082	20.5	1.59033	1.95308
20.52	3.42308	2.74438	20.52	1.53077	2.22336
20.54	3.7198	2.73617	20.54	1.65013	2.18299
20.56	3.34695	2.96026	20.56	1.571	2.42866
20.58	3.48643	3.17116	20.58	1.6484	2.10392
20.6	3.52267	2.9689	20.6	1.68546	2.13064
20.62	3.42448	3.06812	20.62	1.61725	1.90156
20.64	3.4453	2.90376	20.64	1.658	2.21346
20.66	3.56699	3.16845	20.66	1.71411	1.38935
20.68	3.47736	3.21558	20.68	1.68974	2.16427
20.7	3.49614	3.16281	20.7	1.71008	2.06282
20.72	3.62377	2.99141	20.72	1.67073	2.16273
20.74	3.66202	2.98836	20.74	1.74751	2.25047
20.76	3.75936	2.73785	20.76	1.68651	2.1494
20.78	3.55183	3.47463	20.78	1.7123	1.85958
20.8	3.68052	3.55323	20.8	1.7437	1.77981
20.82	3.63919	3.40799	20.82	1.73395	2.19344
20.84	3.53993	3.1549	20.84	1.71019	1.76065
20.86	3.39776	3.37287	20.86	1.64756	1.88513
20.88	3.43256	3.37987	20.88	1.7261	1.97076
20.9	3.47534	3.30315	20.9	1.7949	2.37558
20.92	3.42217	3.26933	20.92	1.79243	2.18802
20.94	3.54403	3.26119	20.94	1.74544	2.05111
20.96	3.45925	3.36329	20.96	1.72407	2.17812
20.98	3.41143	3.61894	20.98	1.77766	1.97413
21	3.4547	3.38449	21	1.63554	2.21333
21.02	3.33544	3.51392	21.02	1.6256	1.90919
21.04	3.32743	3.4104	21.04	1.76228	1.87889
21.06	3.46915	3.43086	21.06	1.64887	1.52892
21.08	3.56034	3.50203	21.08	1.57215	1.53089
21.1	3.5879	3.55688	21.1	1.71615	1.40147
21.12	3.8255	3.53786	21.12	1.69448	1.85284
21.14	3.84543	3.16777	21.14	1.53475	1.91934
21.16	3.87962	3.17314	21.16	1.58553	1.73827
21.18	3.94526	3.14168	21.18	1.46161	1.99245
21.2	3.93113	3.07708	21.2	1.61188	2.41988
21.22	3.74243	3.06461	21.22	1.6138	2.16994
21.24	3.83977	3.44883	21.24	1.6443	2.36227
21.26	3.93663	3.52735	21.26	1.61274	1.86541
21.28	3.79267	3.42325	21.28	1.63066	1.85285
21.3	3.90017	3.31002	21.3	1.69446	2.08485
21.32	4.00504	3.26147	21.32	1.56705	2.11225
21.34	3.98695	3.38568	21.34	1.55091	1.74553
21.36	4.07188	3.23812	21.36	1.63855	2.05183
21.38	3.81628	3.15987	21.38	1.63644	1.86135
21.4	3.85882	3.19396	21.4	1.47919	1.34275
21.42	4.04936	3.21226	21.42	1.53747	1.53315
21.44	4.01077	3.29568	21.44	1.55589	1.41803
21.46	3.89376	3.28387	21.46	1.63422	1.17403
21.48	3.84258	3.22409	21.48	1.628	1.56566
21.5	4.00427	3.2595	21.5	1.61061	1.61996
21.52	3.92367	3.28681	21.52	1.5962	1.5575
21.54	3.74983	3.20744	21.54	1.50755	1.52485
21.56	3.47466	3.23563	21.56	1.51791	1.32498
21.58	3.49731	3.21721	21.58	1.63159	1.81303
21.6	3.29916	3.18972	21.6	1.49158	1.83639
21.62	3.48421	3.22602	21.62	1.60908	1.52804
21.64	3.42075	3.04632	21.64	1.59064	1.72619
21.66	3.4155	3.22619	21.66	1.71487	1.47831
21.68	3.34035	2.92502	21.68	1.72118	1.67089
21.7	3.49364	3.03614	21.7	1.64966	2.11076
21.72	3.36265	2.77886	21.72	1.58149	2.1187
21.74	3.82763	2.63065	21.74	1.65151	1.97494
21.76	3.65929	2.58158	21.76	1.66799	1.95156
21.78	3.73698	2.81855	21.78	1.74076	1.49432
21.8	3.69784	2.52466	21.8	1.67074	1.3824
21.82	3.6256	2.8686	21.82	1.63036	1.66578
21.84	3.83123	3.15162	21.84	1.62777	1.60817
21.86	3.84556	3.07554	21.86	1.66941	1.63437
21.88	3.78932	2.81305	21.88	1.72768	1.59555
21.9	3.67845	2.68341	21.9	1.71823	1.71203
21.92	3.59499	2.27666	21.92	1.69245	2.01466
21.94	3.49569	2.55853	21.94	1.78382	1.35342
21.96	3.01491	2.15942	21.96	1.72656	1.39742
21.98	3.25072	2.26059	21.98	1.73579	1.7326
22	3.1591	2.32489	22	1.86627	1.82744
22.02	3.02907	2.53169	22.02	1.74543	1.47883
22.04	3.03581	2.37726	22.04	1.74603	1.36115
22.06	3.23384	2.05247	22.06	1.70699	2.03309
22.08	3.10924	2.08093	22.08	1.73669	2.46176
22.1	3.17002	1.47375	22.1	1.77707	1.90963
22.12	3.35526	1.60025	22.12	1.6708	1.53102
22.14	3.60604	1.49551	22.14	1.75574	2.03286
22.16	3.47578	1.59625	22.16	1.60008	2.0137
22.18	3.74471	1.64058	22.18	1.60737	1.80859
22.2	3.56809	1.57735	22.2	1.64246	1.81035
22.22	3.74777	1.44012	22.22	1.68775	1.90799
22.24	3.39719	1.38078	22.24	1.66981	1.85518
22.26	3.38567	1.38023	22.26	1.55646	2.0006
22.28	3.30743	1.54305	22.28	1.66302	2.11662
22.3	3.34332	1.29492	22.3	1.68626	1.5487
22.32	3.3794	1.50581	22.32	1.60238	1.82693
22.34	3.40501	1.59375	22.34	1.6257	1.48393
22.36	3.7088	1.22096	22.36	1.65404	1.49322
22.38	3.7071	1.47947	22.38	1.621	1.39441
22.4	3.63849	1.58951	22.4	1.586	1.51334
22.42	3.81231	1.64872	22.42	1.57984	1.53841
22.44	3.79941	1.49117	22.44	1.68225	1.45844
22.46	3.87653	1.76976	22.46	1.72665	1.49014
22.48	3.74573	1.77959	22.48	1.66472	1.74904
22.5	3.75236	1.45737	22.5	1.58762	1.6505
22.52	3.77601	1.5106	22.52	1.65599	1.39041
22.54	4.00696	1.47542	22.54	1.66602	1.50367
22.56	4.02022	1.47341	22.56	1.5827	1.18456
22.58	4.12941	1.52296	22.58	1.67738	1.53674
22.6	3.95222	1.21526	22.6	1.72483	1.32722
22.62	3.86166	1.2002	22.62	1.76685	1.73651
22.64	3.78337	1.42291	22.64	1.65652	1.63392
22.66	3.81504	1.42405	22.66	1.67776	1.95095
22.68	3.56409	1.34408	22.68	1.62334	2.08292
22.7	3.85687	1.35247	22.7	1.76778	1.85168
22.72	3.7963	1.07744	22.72	1.75817	1.86874
22.74	3.96075	1.60325	22.74	1.70221	2.09661
22.76	3.98739	1.43139	22.76	1.76714	2.05722
22.78	3.83947	1.56465	22.78	1.62751	2.03164
22.8	3.90038	1.71591	22.8	1.68293	2.39865
22.82	3.91725	1.49419	22.82	1.65943	2.24493
22.84	4.06509	1.52112	22.84	1.67055	1.97272
22.86	4.12782	1.56421	22.86	1.61109	2.27801
22.88	3.9347	1.56264	22.88	1.67994	2.37382
22.9	4.08554	1.45484	22.9	1.57473	2.06867
22.92	4.02062	1.73343	22.92	1.51711	2.01754
22.94	3.93277	1.36318	22.94	1.53265	2.07527
22.96	3.91674	1.34026	22.96	1.69301	2.25093
22.98	3.90643	1.55867	22.98	1.71692	2.03778
23	3.96409	1.41653	23	1.78684	1.68483
23.02	3.66552	1.76733	23.02	1.71626	1.70473
23.04	3.84707	1.49255	23.04	1.66856	1.8861
23.06	3.74515	1.20994	23.06	1.62383	1.72063
23.08	3.81475	1.24465	23.08	1.67665	1.98895
23.1	3.75692	1.60781	23.1	1.87665	1.92571
23.12	3.96628	1.63662	23.12	1.68367	2.08307
23.14	3.84324	1.26638	23.14	1.65236	2.01641
23.16	3.84003	1.12825	23.16	1.69493	1.6395
23.18	3.82551	1.38272	23.18	1.70142	2.10018
23.2	3.99876	1.54922	23.2	1.57908	1.75252
23.22	3.81401	1.47981	23.22	1.63481	1.40316
23.24	3.77538	1.60495	23.24	1.6166	1.6701
23.26	3.88788	1.75666	23.26	1.66904	1.59726
23.28	3.77103	1.52151	23.28	1.62857	1.69662
23.3	3.62573	1.44715	23.3	1.68945	1.54246
23.32	3.86196	1.17147	23.32	1.64491	1.55824
23.34	3.7429	1.27591	23.34	1.71033	1.60158
23.36	3.63218	1.74349	23.36	1.69975	1.94469
23.38	3.638	1.70342	23.38	1.59216	1.84683
23.4	3.65741	1.35476	23.4	1.73332	2.64595
23.42	3.42957	1.62332	23.42	1.68574	1.93189
23.44	3.26149	1.22803	23.44	1.64529	1.95566
23.46	3.22466	1.51646	23.46	1.62042	2.05387
23.48	3.37664	1.72664	23.48	1.70086	2.29559
23.5	3.3524	1.45772	23.5	1.71015	2.17692
23.52	3.27809	1.42705	23.52	1.71216	1.87825
23.54	3.28423	1.69804	23.54	1.7697	1.77528
23.56	3.27429	1.58548	23.56	1.5718	1.60242
23.58	3.11647	1.49951	23.58	1.65526	1.48404
23.6	3.20466	1.56305	23.6	1.53413	1.62682
23.62	3.07322	1.37734	23.62	1.48008	1.49714
23.64	3.01943	1.52133	23.64	1.64491	1.64864
23.66	2.80439	1.28679	23.66	1.76457	1.50197
23.68	2.91431	1.16102	23.68	1.63874	1.60178
23.7	2.7039	1.34636	23.7	1.61315	1.8227
23.72	2.78281	1.27752	23.72	1.57387	1.54815
23.74	2.76169	1.38559	23.74	1.56897	1.70986
23.76	2.82815	1.44055	23.76	1.66895	1.43322
23.78	2.90548	1.56951	23.78	1.54038	1.28594
23.8	2.97317	1.27314	23.8	1.5889	1.73511
23.82	3.10258	1.57269	23.82	1.62792	1.44192
23.84	3.13752	1.4074	23.84	1.47268	1.37962
23.86	3.14042	1.67815	23.86	1.52339	1.75684
23.88	3.12169	1.31623	23.88	1.49311	1.75764
23.9	3.14369	1.37497	23.9	1.51568	1.85744
23.92	3.27852	1.31147	23.92	1.55754	1.26912
23.94	3.21607	1.12255	23.94	1.55891	1.46987
23.96	3.25507	1.28431	23.96	1.48166	1.58547
23.98	3.09886	1.32829	23.98	1.51753	1.27376
24	3.18825	1.15631	24	1.61107	1.78838
24.02	3.13979	1.34175	24.02	1.57269	1.40302
24.04	3.24865	1.46181	24.04	1.57409	1.47888
24.06	3.13418	1.0419	24.06	1.60813	1.40611
24.08	2.99488	1.34485	24.08	1.68236	1.41879
24.1	2.88235	1.30158	24.1	1.60025	1.40794
24.12	2.99968	1.63206	24.12	1.71117	1.41998
24.14	2.87709	1.20089	24.14	1.78032	1.89633
24.16	2.9046	1.39583	24.16	1.75794	1.92149
24.18	2.79301	1.38332	24.18	1.67362	1.96754
24.2	2.83279	1.62594	24.2	1.74764	1.81364
24.22	2.97584	1.55016	24.22	1.75283	1.98805
24.24	3.10794	1.83431	24.24	1.72489	1.64355
24.26	3.02916	1.51452	24.26	1.70195	1.72647
24.28	3.05655	1.47182	24.28	1.71786	2.04216
24.3	3.3061	1.47077	24.3	1.67991	1.901
24.32	3.29125	1.43649	24.32	1.54735	1.61276
24.34	3.16426	1.04448	24.34	1.58766	1.73881
24.36	3.23846	1.4953	24.36	1.66831	1.86117
24.38	3.05721	1.43255	24.38	1.55444	2.01813
24.4	3.00072	1.50297	24.4	1.65134	2.04582
24.42	2.9311	1.56203	24.42	1.6245	1.95878
24.44	2.83189	1.00538	24.44	1.70357	2.17248
24.46	2.86958	1.35314	24.46	1.60402	1.99793
24.48	2.83575	1.45171	24.48	1.69279	1.92039
24.5	2.8115	1.63463	24.5	1.58545	2.20846
24.52	2.80977	1.84471	24.52	1.4924	1.82532
24.54	2.78656	1.76858	24.54	1.62397	1.9499
24.56	2.83991	2.05136	24.56	1.71381	2.63111
24.58	2.85106	2.0792	24.58	1.75682	2.56047
24.6	2.71458	2.76689	24.6	1.70757	2.78997
24.62	2.69557	2.32782	24.62	1.72451	2.3843
24.64	2.72833	2.58169	24.64	1.70465	2.27287
24.66	2.76908	2.4848	24.66	1.59221	2.33591
24.68	2.76394	2.49989	24.68	1.71347	2.28605
24.7	2.63265	2.85627	24.7	1.61528	1.4021
24.72	2.6874	2.63001	24.72	1.62334	2.08564
24.74	2.69032	2.5434	24.74	1.69483	1.44593
24.76	2.66786	2.7695	24.76	1.6253	1.57784
24.78	2.59856	2.79182	24.78	1.73589	1.65912
24.8	2.63446	2.77646	24.8	1.58488	1.39643
24.82	2.69375	3.0734	24.82	1.63015	2.13209
24.84	2.5671	3.33431	24.84	1.58313	1.49736
24.86	2.51912	3.46412	24.86	1.61667	2.03193
24.88	2.54505	3.53418	24.88	1.63136	2.05077
24.9	2.50753	3.49613	24.9	1.60973	2.07987
24.92	2.39969	3.47498	24.92	1.6593	2.12058
24.94	2.48529	3.35098	24.94	1.62493	2.10881
24.96	2.53152	3.44082	24.96	1.64176	1.78699
24.98	2.45089	3.44588	24.98	1.82193	1.82814
25	2.54431	3.26624	25	1.80347	1.90948
25.02	2.62869	3.353	25.02	1.93365	2.06993
25.04	2.49007	3.52028	25.04	1.90046	1.43213
25.06	2.45919	3.3958	25.06	1.77875	1.49286
25.08	2.51375	3.29148	25.08	1.73135	1.6525
25.1	2.53613	3.55466	25.1	1.81457	1.66607
25.12	2.72758	3.48175	25.12	1.73556	1.8788
25.14	2.59949	3.40541	25.14	1.72688	2.3207
25.16	2.61005	3.48211	25.16	1.7563	2.00919
25.18	2.70939	3.42889	25.18	1.64561	1.80409
25.2	2.70636	3.4994	25.2	1.7665	1.73457
25.22	2.75335	3.46169	25.22	1.83377	1.92724
25.24	2.82268	3.53761	25.24	1.76889	1.70797
25.26	2.70362	3.42543	25.26	1.86673	1.6298
25.28	2.64302	3.50207	25.28	1.88167	1.87631
25.3	2.73453	3.455	25.3	1.80453	1.8062
25.32	2.71958	3.37605	25.32	1.75965	1.86647
25.34	2.63474	3.39439	25.34	1.75464	2.14304
25.36	2.63706	3.41803	25.36	1.66406	1.8064
25.38	2.56353	3.36899	25.38	1.76626	1.76482
25.4	2.54437	3.23078	25.4	1.72303	1.97132
25.42	2.53019	3.53805	25.42	1.7162	1.43247
25.44	2.55925	3.2662	25.44	1.77811	1.16528
25.46	2.62201	3.36705	25.46	1.7605	1.73292
25.48	2.65415	3.43074	25.48	1.79929	2.67525
25.5	2.69813	3.24888	25.5	1.77287	1.66594
25.52	2.83325	3.35544	25.52	1.83988	1.48832
25.54	2.76945	3.3116	25.54	1.74944	1.41913
25.56	2.63583	3.29457	25.56	1.68956	1.55232
25.58	2.76762	3.30689	25.58	1.64946	1.61115
25.6	2.72085	3.47245	25.6	1.68063	1.42545
25.62	2.69138	3.51369	25.62	1.63138	1.36315
25.64	2.71798	3.4047	25.64	1.57474	1.49799
25.66	2.68639	3.46069	25.66	1.64344	1.56887
25.68	2.66736	3.3705	25.68	1.8418	1.47171
25.7	2.78708	3.42523	25.7	1.63569	1.78434
25.72	2.9228	3.27189	25.72	1.68024	1.70126
25.74	2.96946	3.46741	25.74	1.69132	1.40906
25.76	3.05618	3.44778	25.76	1.83548	1.57773
25.78	3.13165	3.37164	25.78	1.70449	2.06352
25.8	3.19862	3.4516	25.8	1.82303	1.42615
25.82	3.04747	3.55958	25.82	1.74495	1.682
25.84	3.12566	3.3952	25.84	1.68453	1.87026
25.86	3.11841	3.1074	25.86	1.66645	1.72317
25.88	2.92625	3.16965	25.88	1.71832	1.99216
25.9	3.0704	3.37167	25.9	1.73423	1.78427
25.92	2.94448	3.34183	25.92	1.72707	2.00882
25.94	3.17429	3.43094	25.94	1.72144	1.81669
25.96	3.23017	3.33289	25.96	1.71749	1.90807
25.98	3.11195	3.33154	25.98	1.68096	1.94814
26	3.04424	3.2403	26	1.6964	2.29706
26.02	3.13632	3.34878	26.02	1.77569	2.07724
26.04	3.33122	3.43932	26.04	1.84821	2.34912
26.06	3.3092	3.44731	26.06	1.7637	1.84484
26.08	3.34118	3.50627	26.08	1.86226	2.27194
26.1	3.35126	3.27569	26.1	1.89773	1.54952
26.12	3.24823	3.14203	26.12	1.74273	1.94196
26.14	3.22191	3.11819	26.14	1.87853	1.65204
26.16	3.23484	3.07053	26.16	1.82901	1.66544
26.18	3.05019	3.12551	26.18	1.71914	2.16974
26.2	2.97226	3.04478	26.2	1.65976	1.62977
26.22	2.9331	3.0253	26.22	1.71312	2.2507
26.24	2.94489	3.08508	26.24	1.61199	2.11325
26.26	2.826	3.05419	26.26	1.63774	2.02946
26.28	2.96978	3.1691	26.28	1.70815	2.16235
26.3	2.90605	3.2816	26.3	1.79068	2.2359
26.32	2.90095	3.04397	26.32	1.7921	1.62209
26.34	3.00583	3.07684	26.34	1.89016	1.80635
26.36	3.0388	3.2033	26.36	1.82032	2.62437
26.38	3.1383	3.28672	26.38	1.7827	1.9935
26.4	3.12049	3.28448	26.4	1.6913	2.06409
26.42	3.1787	3.46374	26.42	1.75074	2.11213
26.44	3.15626	3.37462	26.44	1.80465	2.15358
26.46	3.12591	3.48534	26.46	1.88806	1.97201
26.48	3.09484	3.36634	26.48	1.76982	1.90355
26.5	3.13465	3.14282	26.5	1.81348	2.06652
26.52	3.12384	3.19	26.52	1.87592	2.0659
26.54	3.12563	3.18137	26.54	1.79843	2.24293
26.56	3.02351	3.14173	26.56	1.76458	2.08524
26.58	2.93315	3.09567	26.58	1.74985	2.23337
26.6	3.16598	3.0918	26.6	1.71614	2.20799
26.62	3.13179	3.03531	26.62	1.81609	2.08667
26.64	3.05953	2.68339	26.64	1.92508	1.52606
26.66	2.97238	3.14233	26.66	1.81823	2.02218
26.68	3.16397	2.74792	26.68	1.7326	2.19116
26.7	3.31938	2.98945	26.7	1.67198	1.93975
26.72	3.23959	3.14006	26.72	1.76579	1.82858
26.74	3.27427	3.41285	26.74	1.88906	1.69834
26.76	3.31085	3.06231	26.76	1.8025	2.01946
26.78	3.2237	2.84087	26.78	1.86134	1.84869
26.8	3.14125	2.98308	26.8	1.77273	1.82814
26.82	3.0577	2.99474	26.82	1.77456	1.73352
26.84	2.99076	3.0004	26.84	1.95991	1.95631
26.86	3.05198	3.00351	26.86	1.89448	1.80425
26.88	3.09232	3.25915	26.88	1.98969	1.66615
26.9	2.99494	3.44736	26.9	1.97692	1.71417
26.92	3.0735	3.37345	26.92	1.87737	1.63249
26.94	3.03301	3.37897	26.94	1.89875	2.13857
26.96	2.99827	3.21345	26.96	1.89359	1.90574
26.98	3.03843	3.51873	26.98	1.89977	2.41095
27	3.07556	3.52932	27	1.97296	1.90235
27.02	3.07153	3.51267	27.02	1.83081	1.77994
27.04	3.12692	3.3783	27.04	1.91478	2.27859
27.06	3.12887	3.1854	27.06	1.90768	1.87881
27.08	3.05234	3.32674	27.08	1.88968	2.09083
27.1	3.14897	3.38027	27.1	1.92343	2.18495
27.12	3.10209	3.26418	27.12	1.87806	2.01175
27.14	3.17069	3.00462	27.14	1.86346	2.31257
27.16	3.08214	3.38657	27.16	1.90116	2.06857
27.18	3.02862	3.44908	27.18	2.07314	1.71482
27.2	3.08926	3.29654	27.2	1.8792	2.23795
27.22	2.99758	3.55562	27.22	2.0582	2.18398
27.24	3.06852	3.34519	27.24	2.14621	1.92479
27.26	3.13206	3.34395	27.26	1.99869	2.13917
27.28	3.07385	3.30551	27.28	2.05304	1.47245
27.3	3.14369	3.43696	27.3	1.87443	1.48359
27.32	3.13579	3.3912	27.32	1.99073	1.77763
27.34	3.13411	3.32	27.34	1.92795	1.75916
27.36	3.10627	3.38632	27.36	1.77394	1.36174
27.38	3.11653	3.38877	27.38	1.8641	1.7346
27.4	3.1387	3.34839	27.4	1.83911	1.42099
27.42	3.05707	3.43799	27.42	1.96841	1.79936
27.44	3.04318	3.37046	27.44	2.04901	1.44844
27.46	2.97432	3.44231	27.46	1.86767	1.81845
27.48	3.12908	3.34075	27.48	1.94035	2.07916
27.5	3.11107	3.34377	27.5	1.92761	2.65812
27.52	3.01478	3.31198	27.52	1.8133	2.14401
27.54	3.07044	3.38689	27.54	1.89601	2.31035
27.56	3.23801	3.39202	27.56	1.88919	2.2361
27.58	3.12134	3.28861	27.58	1.87488	1.78035
27.6	3.09664	3.21557	27.6	1.89073	2.25673
27.62	3.16934	3.38471	27.62	1.77464	1.91401
27.64	3.16241	3.40808	27.64	1.79524	1.79403
27.66	3.19323	2.98997	27.66	1.92771	1.73053
27.68	3.21462	2.92369	27.68	1.93777	1.67757
27.7	3.11618	2.90472	27.7	2.03129	2.30818
27.72	3.16116	2.91771	27.72	1.81685	2.11476
27.74	3.09152	2.92732	27.74	1.95121	2.55507
27.76	3.14491	3.02958	27.76	1.91718	1.88732
27.78	3.1554	2.80419	27.78	1.99459	2.11438
27.8	3.15572	2.98883	27.8	1.88665	1.83575
27.82	3.11154	2.81737	27.82	1.84466	1.995
27.84	3.09482	3.13409	27.84	1.88262	2.08963
27.86	3.27342	2.91375	27.86	2.00653	2.18986
27.88	3.29876	3.10248	27.88	2.13932	2.30087
27.9	3.21727	3.26266	27.9	1.8823	1.65129
27.92	3.14617	3.37296	27.92	1.80605	1.96817
27.94	3.19635	3.41318	27.94	1.96467	1.91944
27.96	3.25446	3.54662	27.96	1.87832	1.97215
27.98	3.25219	3.35232	27.98	1.9559	1.76891
28	3.1702	3.46258	28	1.92318	1.61176
28.02	3.28106	3.40672	28.02	1.96839	1.58503
28.04	3.24947	3.48785	28.04	1.98772	1.42894
28.06	3.17951	3.58693	28.06	1.95683	1.80488
28.08	3.23703	3.54287	28.08	1.74265	1.70882
28.1	3.22254	3.26589	28.1	1.87314	1.73784
28.12	3.27879	3.44806	28.12	1.79602	1.96117
28.14	3.25174	3.47537	28.14	1.80201	2.0602
28.16	3.29358	3.43021	28.16	1.78586	1.78895
28.18	3.28376	3.08947	28.18	1.90876	2.10343
28.2	3.33395	3.29953	28.2	1.90732	1.86482
28.22	3.24673	3.47125	28.22	1.90441	1.77206
28.24	3.31015	3.26236	28.24	1.96384	2.07359
28.26	3.22471	3.44721	28.26	1.78687	1.58449
28.28	3.2111	3.41285	28.28	2.01148	2.31717
28.3	3.18993	3.52536	28.3	2.12389	2.40075
28.32	3.29078	3.20325	28.32	1.9251	2.26999
28.34	3.25474	3.13328	28.34	1.86522	2.42356
28.36	3.15613	3.37813	28.36	1.82675	2.04105
28.38	3.05516	3.2772	28.38	1.81719	1.9221
28.4	3.11269	3.08486	28.4	1.83306	1.55968
28.42	3.07136	2.94234	28.42	1.94747	2.09714
28.44	3.10567	2.74817	28.44	1.98734	1.89276
28.46	3.03685	3.28548	28.46	1.96256	2.30676
28.48	3.07462	3.35887	28.48	1.93663	2.56669
28.5	3.08477	3.33632	28.5	1.82915	2.52777
28.52	3.02794	3.21353	28.52	1.90863	2.65365
28.54	2.9867	3.24601	28.54	1.97996	2.88423
28.56	3.08953	3.29261	28.56	1.85801	2.12315
28.58	3.04037	3.26686	28.58	1.89313	2.03941
28.6	3.06132	3.28695	28.6	1.8299	1.47723
28.62	3.16072	3.45058	28.62	2.03421	1.84353
28.64	3.05635	3.34583	28.64	1.9915	1.84958
28.66	3.09475	3.30756	28.66	1.99841	1.92132
28.68	3.11632	3.19326	28.68	1.83623	1.78866
28.7	3.11223	3.45015	28.7	1.9011	1.63545
28.72	3.07494	3.37313	28.72	1.89129	1.52502
28.74	3.16935	3.33453	28.74	2.00352	1.8824
28.76	3.22626	3.30064	28.76	1.9067	1.72859
28.78	3.13632	3.40759	28.78	1.89471	1.99023
28.8	3.19601	3.27935	28.8	1.7692	1.77715
28.82	3.10043	3.15955	28.82	1.87653	1.66682
28.84	3.14747	3.31544	28.84	1.88968	1.71144
28.86	3.05325	3.24497	28.86	1.95136	1.86243
28.88	3.17881	3.42096	28.88	1.87621	2.00125
28.9	3.18504	3.37418	28.9	1.83409	1.78392
28.92	3.21553	3.54315	28.92	1.89001	1.62526
28.94	3.23888	3.45484	28.94	1.85784	2.15102
28.96	3.20836	2.97578	28.96	1.71359	2.06409
28.98	3.24976	2.75943	28.98	1.71302	2.42501
29	3.44684	2.72326	29	1.75423	2.3354
29.02	3.43028	2.58373	29.02	1.661	1.7905
29.04	3.44048	2.72386	29.04	1.74268	2.23869
29.06	3.46164	2.78209	29.06	1.76538	2.00565
29.08	3.49561	2.54516	29.08	1.82622	2.75051
29.1	3.4354	2.71765	29.1	1.82706	2.85799
29.12	3.5103	2.68311	29.12	1.80386	2.87342
29.14	3.29145	2.82856	29.14	1.82966	2.92315
29.16	3.47879	2.4072	29.16	1.82266	2.85302
29.18	3.41672	2.99068	29.18	1.8437	2.37557
29.2	3.4153	2.83969	29.2	1.68757	2.80995
29.22	3.49435	2.88418	29.22	1.71712	2.71066
29.24	3.56852	2.53098	29.24	1.83981	3.03315
29.26	3.43389	2.6911	29.26	1.72943	3.15432
29.28	3.45287	2.88615	29.28	1.82326	2.96323
29.3	3.61039	2.8172	29.3	1.75821	3.1804
29.32	3.67772	2.8591	29.32	1.7949	3.00218
29.34	3.43656	3.10841	29.34	1.76267	3.0567
29.36	3.41997	2.44353	29.36	1.90122	3.10725
29.38	3.34132	2.53943	29.38	1.85704	2.96451
29.4	3.34015	2.83557	29.4	1.90883	2.95519
29.42	3.30695	2.55692	29.42	1.89507	2.9855
29.44	3.26793	2.53475	29.44	1.91325	2.73266
29.46	3.36253	2.86419	29.46	1.71586	2.57056
29.48	3.33439	2.65298	29.48	1.82134	3.23701
29.5	3.43196	2.89559	29.5	1.82686	2.83632
29.52	3.32886	2.70957	29.52	1.8312	2.73843
29.54	3.45826	2.81055	29.54	1.80681	2.63855
29.56	3.43299	2.85969	29.56	1.88311	2.30125
29.58	3.43015	2.71933	29.58	1.8576	2.21011
29.6	3.4838	2.89693	29.6	1.75237	2.39406
29.62	3.40179	2.79238	29.62	1.73099	1.54351
29.64	3.44914	2.564	29.64	1.76071	2.02865
29.66	3.46155	2.48821	29.66	1.73936	2.19891
29.68	3.45595	2.70648	29.68	1.76803	1.90308
29.7	3.48134	2.81439	29.7	1.77297	2.31031
29.72	3.483	2.65341	29.72	1.7943	1.90092
29.74	3.54818	2.92288	29.74	1.74777	2.12296
29.76	3.55524	2.84348	29.76	1.65158	2.17555
29.78	3.55954	2.68578	29.78	1.81173	1.92615
29.8	3.43754	2.64345	29.8	1.85027	2.18819
29.82	3.45126	2.76136	29.82	1.81158	1.91014
29.84	3.31178	2.47831	29.84	1.72373	2.0509
29.86	3.3414	2.31279	29.86	1.6884	2.67867
29.88	3.37783	2.47198	29.88	1.71376	2.4431
29.9	3.40509	2.60459	29.9	1.79613	2.08125
29.92	3.44462	2.00853	29.92	1.76602	1.8262
29.94	3.32199	2.38445	29.94	1.83182	1.79229
29.96	3.31346	2.19359	29.96	1.7987	2.11595
29.98	3.35005	2.15804	29.98	1.8866	1.82134
30	3.32916	1.94813	30	1.76905	1.68527
30.02	3.36526	2.14607	30.02	1.74803	1.68781
30.04	3.34364	2.50401	30.04	1.78758	1.4811
30.06	3.384	2.5182	30.06	1.83454	1.47053
30.08	3.3685	2.11972	30.08	1.78617	1.63019
30.1	3.36005	2.09308	30.1	1.77914	1.73682
30.12	3.42208	2.07296	30.12	1.89244	1.57394
30.14	3.41938	1.88153	30.14	1.94377	1.56572
30.16	3.4885	2.05013	30.16	1.87385	1.47379
30.18	3.42851	1.90895	30.18	1.75107	1.6118
30.2	3.4603	2.54002	30.2	1.79668	1.52744
30.22	3.31873	2.15056	30.22	1.90442	1.26315
30.24	3.3883	2.10752	30.24	1.8196	1.67393
30.26	3.43474	2.32397	30.26	1.83734	1.6698
30.28	3.44792	1.86153	30.28	1.91104	1.8565
30.3	3.43248	1.60457	30.3	1.84608	1.39239
30.32	3.39477	1.73169	30.32	1.80611	1.69362
30.34	3.42036	0.992932	30.34	1.80688	2.00574
30.36	3.43049	1.51868	30.36	1.79302	2.34354
30.38	3.3724	1.29237	30.38	1.77433	2.21868
30.4	3.33218	0.895819	30.4	1.84028	1.93627
30.42	3.35599	1.29447	30.42	1.73625	1.56626
30.44	3.46228	1.55979	30.44	1.83496	1.20901
30.46	3.48173	1.55332	30.46	1.74655	1.60899
30.48	3.46709	1.93375	30.48	1.77104	0.917892
30.5	3.36164	2.10537	30.5	1.86427	1.14801
30.52	3.45805	1.98626	30.52	1.90793	1.64863
30.54	3.34344	1.8315	30.54	2.1149	1.46434
30.56	3.41481	1.74462	30.56	1.95844	1.84671
30.58	3.39042	1.75445	30.58	1.88651	2.06462
30.6	3.3677	1.97776	30.6	1.89633	1.64157
30.62	3.41911	1.77977	30.62	1.82517	1.71699
30.64	3.44449	1.92476	30.64	1.83882	1.67014
30.66	3.38863	1.90014	30.66	1.7822	1.33628
30.68	3.41725	1.90734	30.68	1.77578	2.07806
30.7	3.32785	1.79216	30.7	1.75613	1.84899
30.72	3.42766	2.09755	30.72	1.6534	3.19344
30.74	3.3111	1.92886	30.74	1.71828	2.56525
30.76	3.30563	2.05425	30.76	1.89958	2.26714
30.78	3.27589	2.36264	30.78	1.87613	1.94243
30.8	3.33998	2.16793	30.8	1.71319	2.10076
30.82	3.27641	2.30167	30.82	1.76213	2.13153
30.84	3.37993	2.11851	30.84	1.72657	2.35639
30.86	3.2514	2.4055	30.86	1.84166	1.96879
30.88	3.3723	2.16999	30.88	1.89571	2.26869
30.9	3.39	2.22768	30.9	1.74508	1.51137
30.92	3.33756	2.21221	30.92	1.86507	1.95264
30.94	3.32441	2.25355	30.94	1.89175	1.72153
30.96	3.34993	2.24243	30.96	1.7851	2.05922
30.98	3.3021	2.03759	30.98	1.82783	2.12776
31	3.30125	2.02811	31	1.73828	2.34239
31.02	3.33019	2.08331	31.02	1.81944	1.64772
31.04	3.30602	1.84325	31.04	1.79145	1.02234
31.06	3.29649	1.81303	31.06	1.91657	2.23236
31.08	3.26366	1.92292	31.08	1.90053	2.0653
31.1	3.3688	2.13117	31.1	1.78271	1.88064
31.12	3.33982	1.864	31.12	1.84321	0.789904
31.14	3.33761	1.87	31.14	1.88882	1.04274
31.16	3.24402	2.58504	31.16	1.87417	1.15396
31.18	3.37929	2.25774	31.18	1.82599	1.31605
31.2	3.36654	1.99998	31.2	1.80063	1.23177
31.22	3.33742	2.43916	31.22	1.78438	1.38294
31.24	3.33082	1.79523	31.24	1.71587	1.78589
31.26	3.35026	2.10256	31.26	1.71808	1.05376
31.28	3.36516	2.06033	31.28	1.76188	1.43079
31.3	3.36137	1.61912	31.3	1.81532	1.98925
31.32	3.37248	1.59427	31.32	1.71371	1.63975
31.34	3.3295	1.77068	31.34	1.74474	1.5594
31.36	3.40685	1.31876	31.36	1.74678	1.28648
31.38	3.37743	2.01029	31.38	1.7404	1.20101
31.4	3.28521	1.0695	31.4	1.81258	1.53608
31.42	3.27903	1.18219	31.42	1.81635	1.02532
31.44	3.34338	1.30189	31.44	1.86452	1.21572
31.46	3.24422	1.4495	31.46	1.90191	1.03214
31.48	3.30321	1.78227	31.48	1.94418	1.76673
31.5	3.27536	1.72766	31.5	1.94808	1.7321
31.52	3.25955	2.15395	31.52	1.81983	1.34645
31.54	3.30348	1.76593	31.54	1.73449	1.3828
31.56	3.37114	1.39378	31.56	1.70974	0.977225
31.58	3.37603	1.49945	31.58	1.75036	1.15939
31.6	3.35527	1.82859	31.6	1.75479	1.40491
31.62	3.32693	1.65424	31.62	1.83367	1.43323
31.64	3.30241	1.76995	31.64	1.7751	1.42863
31.66	3.38927	1.57218	31.66	1.90846	1.40503
31.68	3.32754	1.37951	31.68	1.8152	1.5223
31.7	3.33743	1.43679	31.7	1.80974	1.82654
31.72	3.3051	1.68939	31.72	1.75789	1.89821
31.74	3.46729	1.36399	31.74	1.74907	1.96009
31.76	3.44568	1.13226	31.76	1.76269	1.95418
31.78	3.50885	1.36961	31.78	1.85429	1.38118
31.8	3.42241	1.40729	31.8	1.89311	2.18334
31.82	3.43397	1.29322	31.82	1.60795	2.18624
31.84	3.49024	1.72054	31.84	1.93387	1.87083
31.86	3.3507	1.63734	31.86	1.84246	1.69658
31.88	3.36626	1.33502	31.88	1.88706	2.10726
31.9	3.38055	1.59616	31.9	1.85647	2.24908
31.92	3.32042	1.11609	31.92	1.96492	1.66147
31.94	3.3275	1.37141	31.94	1.95348	1.90225
31.96	3.42648	1.14689	31.96	1.86199	2.10867
31.98	3.40176	1.21552	31.98	1.97272	1.93067
32	3.3959	1.44751	32	1.84819	1.59712
32.02	3.27182	1.10302	32.02	1.80393	2.10203
32.04	3.34673	1.43952	32.04	1.84038	1.59003
32.06	3.41152	1.17336	32.06	1.79739	1.80434
32.08	3.32683	1.19262	32.08	1.79013	1.70866
32.1	3.35083	1.16032	32.1	1.67719	1.74701
32.12	3.32632	0.969442	32.12	1.70281	2.06319
32.14	3.24655	0.932626	32.14	1.76894	1.64344
32.16	3.25122	0.889912	32.16	1.74375	2.16356
32.18	3.24954	1.13165	32.18	1.83777	1.61731
32.2	3.18328	1.31103	32.2	1.82507	2.22672
32.22	3.11529	1.32569	32.22	1.7629	2.07298
32.24	3.08239	0.985885	32.24	1.74629	1.69366
32.26	3.14738	0.934006	32.26	1.82695	1.89036
32.28	3.12141	1.04026	32.28	1.78055	1.63449
32.3	3.23604	1.02785	32.3	1.72272	1.78249
32.32	3.29628	1.40388	32.32	1.71531	1.83209
32.34	3.28372	1.27958	32.34	1.76739	1.83076
32.36	3.32987	1.72012	32.36	1.77607	2.06347
32.38	3.30577	2.19854	32.38	1.83539	1.68911
32.4	3.31061	2.18454	32.4	1.76097	1.66538
32.42	3.37943	2.29403	32.42	1.78276	1.81001
32.44	3.35678	2.47356	32.44	1.88783	1.93512
32.46	3.31419	3.23091	32.46	1.90491	1.89817
32.48	3.3718	3.51382	32.48	1.89201	1.99944
32.5	3.31574	3.6966	32.5	1.74148	1.79365
32.52	3.39781	3.23244	32.52	1.80783	1.30631
32.54	3.34387	3.16042	32.54	1.77877	1.15844
32.56	3.37929	3.16257	32.56	1.76485	1.70069
32.58	3.36107	3.06758	32.58	1.76354	1.74796
32.6	3.43558	3.05629	32.6	1.6855	1.57288
32.62	3.50618	3.37011	32.62	1.67426	1.59778
32.64	3.4469	3.10306	32.64	1.84201	1.87485
32.66	3.46873	3.13158	32.66	1.7965	1.81264
32.68	3.50722	3.10979	32.68	1.83479	1.76959
32.7	3.40762	3.43546	32.7	1.70492	1.3482
32.72	3.47944	3.48144	32.72	1.63755	1.535
32.74	3.60445	3.32334	32.74	1.71257	1.44462
32.76	3.58758	3.12437	32.76	1.69373	1.43777
32.78	3.51858	3.06301	32.78	1.75926	1.47601
32.8	3.45451	3.62517	32.8	1.75602	1.72146
32.82	3.47396	3.27473	32.82	1.68243	1.70502
32.84	3.49657	3.16598	32.84	1.64284	1.29383
32.86	3.53286	2.84371	32.86	1.58412	1.38179
32.88	3.44036	2.72315	32.88	1.6397	2.02735
32.9	3.44591	3.26958	32.9	1.53045	1.67729
32.92	3.5337	2.8472	32.92	1.51801	1.78525
32.94	3.50791	2.71902	32.94	1.57756	1.69295
32.96	3.50278	2.62008	32.96	1.61166	1.86207
32.98	3.47655	2.62869	32.98	1.60604	1.99766
33	3.56505	2.77016	33	1.73834	1.92987
33.02	3.51194	2.8014	33.02	1.78297	1.57832
33.04	3.47118	2.99602	33.04	1.75471	1.79964
33.06	3.51383	2.89081	33.06	1.65148	1.76913
33.08	3.45569	2.92714	33.08	1.62946	1.6982
33.1	3.48459	3.00014	33.1	1.70782	1.63157
33.12	3.5146	3.0337	33.12	1.74181	1.55861
33.14	3.46905	3.46487	33.14	1.68548	1.96389
33.16	3.49578	3.05843	33.16	1.70447	1.73155
33.18	3.54623	3.35808	33.18	1.66062	1.84559
33.2	3.55609	3.04299	33.2	1.76375	1.80745
33.22	3.48325	2.84846	33.22	1.76562	1.5867
33.24	3.4596	3.13639	33.24	1.82685	1.93081
33.26	3.50672	2.95101	33.26	1.70405	2.02193
33.28	3.57379	2.54138	33.28	1.80957	2.30854
33.3	3.51402	2.93454	33.3	1.80396	2.228
33.32	3.45906	2.94815	33.32	1.6939	1.47514
33.34	3.5093	2.75606	33.34	1.69128	1.74966
33.36	3.40655	3.22027	33.36	1.80599	1.97508
33.38	3.44397	3.23384	33.38	1.82211	1.77586
33.4	3.46544	3.25043	33.4	1.82406	1.76598
33.42	3.49711	3.70093	33.42	1.73947	1.73809
33.44	3.47242	3.02773	33.44	1.66441	1.80917
33.46	3.57419	2.91579	33.46	1.75601	1.77676
33.48	3.54324	2.75213	33.48	1.65955	2.31487
33.5	3.54782	2.57604	33.5	1.67437	1.94343
33.52	3.55014	2.91151	33.52	1.71248	1.67906
33.54	3.5768	2.80062	33.54	1.80602	1.38515
33.56	3.56802	2.79075	33.56	1.62402	1.44344
33.58	3.56139	3.1565	33.58	1.58103	1.79476
33.6	3.58973	2.59862	33.6	1.68627	1.00554
33.62	3.32431	2.41908	33.62	1.79392	1.42131
33.64	3.5853	2.4226	33.64	1.50839	1.015
33.66	3.58354	2.47627	33.66	1.60927	1.51164
33.68	3.5998	2.85224	33.68	1.54007	1.46611
33.7	3.56633	2.43837	33.7	1.56146	1.54868
33.72	3.51063	2.60236	33.72	1.57499	1.49668
33.74	3.55307	2.51237	33.74	1.55124	1.84708
33.76	3.54699	2.34081	33.76	1.57578	1.75797
33.78	3.49323	2.42948	33.78	1.60804	1.22803
33.8	3.55071	2.28598	33.8	1.65585	1.35153
33.82	3.52128	2.14517	33.82	1.53309	1.46077
33.84	3.39969	2.07781	33.84	1.55983	1.96028
33.86	3.46686	2.42868	33.86	1.60872	2.72836
33.88	3.51105	2.66282	33.88	1.6262	2.69325
33.9	3.46312	3.17651	33.9	1.64299	2.41641
33.92	3.49912	2.87549	33.92	1.60421	2.70646
33.94	3.55056	2.53489	33.94	1.55273	2.32443
33.96	3.48519	3.1428	33.96	1.55477	2.68361
33.98	3.47324	3.28498	33.98	1.67975	2.66229
34	3.52775	3.16249	34	1.57766	2.41999
34.02	3.46043	2.46315	34.02	1.58463	2.3791
34.04	3.57846	2.21576	34.04	1.61864	2.61175
34.06	3.53232	2.18858	34.06	1.56149	2.84582
34.08	3.56826	2.44005	34.08	1.56328	2.71134
34.1	3.63859	1.94747	34.1	1.6326	2.46484
34.12	3.65184	2.33606	34.12	1.69414	2.48236
34.14	3.62383	2.18454	34.14	1.71779	2.57157
34.16	3.59827	1.94643	34.16	1.6992	2.65095
34.18	3.54728	2.12268	34.18	1.63563	2.57713
34.2	3.58956	2.0222	34.2	1.64467	2.78465
34.22	3.63535	2.20987	34.22	1.62467	2.92864
34.24	3.53247	2.20649	34.24	1.62167	2.6699
34.26	3.588	2.32265	34.26	1.624	2.71119
34.28	3.58229	2.26994	34.28	1.68176	3.13577
34.3	3.56588	2.26035	34.3	1.66513	3.07657
34.32	3.58276	2.2311	34.32	1.67327	2.95736
34.34	3.57092	2.27737	34.34	1.66785	2.84024
34.36	3.51586	2.52351	34.36	1.63031	3.04294
34.38	3.56661	2.17608	34.38	1.63574	2.84071
34.4	3.55816	2.53975	34.4	1.64286	3.21871
34.42	3.64746	2.31167	34.42	1.70703	2.95965
34.44	3.48416	2.10042	34.44	1.67954	2.75162
34.46	3.53484	2.02508	34.46	1.7047	3.12938
34.48	3.47246	2.25021	34.48	1.65571	2.91484
34.5	3.58382	2.16978	34.5	1.73096	3.02526
34.52	3.56612	2.17978	34.52	1.75014	3.26395
34.54	3.54236	2.19786	34.54	1.74946	2.43121
34.56	3.60919	2.56121	34.56	1.78101	2.73513
34.58	3.52174	2.34826	34.58	1.79217	2.34033
34.6	3.552	2.4661	34.6	1.77638	2.17335
34.62	3.52392	2.18554	34.62	1.81223	2.58275
34.64	3.4537	2.43283	34.64	1.74199	2.37708
34.66	3.49806	2.22462	34.66	1.70987	2.27953
34.68	3.4729	2.48389	34.68	1.75298	2.5343
34.7	3.52823	2.30715	34.7	1.77942	2.80365
34.72	3.49446	2.46035	34.72	1.71049	3.22427
34.74	3.36904	2.68358	34.74	1.63507	2.7002
34.76	3.45865	2.45745	34.76	1.59231	3.00278
34.78	3.57263	2.71984	34.78	1.62265	2.97256
34.8	3.48037	2.37771	34.8	1.68861	1.07653
34.82	3.47096	2.65057	34.82	1.61352	1.7638
34.84	3.49451	2.32403	34.84	1.67721	1.36426
34.86	3.48468	2.20944	34.86	1.76755	1.72009
34.88	3.50971	2.73391	34.88	1.72776	2.1281
34.9	3.50303	2.24808	34.9	1.79417	2.57843
34.92	3.56296	2.51171	34.92	1.63718	2.54099
34.94	3.46972	2.42954	34.94	1.76203	2.71197
34.96	3.56069	2.17653	34.96	1.68033	3.2123
34.98	3.64099	2.44885	34.98	1.76543	2.88706
35	3.54401	2.26783	35	1.65173	2.88725
35.02	3.57374	2.17542	35.02	1.73293	2.67731
35.04	3.53496	2.47791	35.04	1.63995	2.93889
35.06	3.53431	2.07332	35.06	1.68779	2.72509
35.08	3.56757	2.29198	35.08	1.6454	2.76884
35.1	3.55361	2.28949	35.1	1.61993	2.77501
35.12	3.57108	2.26199	35.12	1.72508	2.83795
35.14	3.61076	2.4544	35.14	1.71044	2.87387
35.16	3.49592	2.58776	35.16	1.67112	3.01299
35.18	3.49182	2.48837	35.18	1.61079	3.03047
35.2	3.50244	2.42603	35.2	1.63008	2.81809
35.22	3.58183	2.40705	35.22	1.61322	3.02536
35.24	3.55192	2.3994	35.24	1.61923	3.04285
35.26	3.52123	2.41406	35.26	1.61541	2.94816
35.28	3.53886	2.34024	35.28	1.62823	2.93304
35.3	3.49591	2.38548	35.3	1.68335	2.99923
35.32	3.53119	2.29187	35.32	1.66487	2.91365
35.34	3.56618	2.25177	35.34	1.74068	2.85028
35.36	3.58861	2.19721	35.36	1.65858	2.90089
35.38	3.60635	2.27709	35.38	1.62891	3.27523
35.4	3.58034	2.21844	35.4	1.58522	3.11017
35.42	3.50412	2.23941	35.42	1.52603	3.10416
35.44	3.56596	2.19179	35.44	1.69473	2.88293
35.46	3.47062	2.04033	35.46	1.58337	2.68419
35.48	3.4703	2.25548	35.48	1.62789	3.01745
35.5	3.5491	2.30967	35.5	1.75931	2.67561
35.52	3.4672	2.14925	35.52	1.75653	2.83379
35.54	3.61579	2.45081	35.54	1.66188	2.82575
35.56	3.6192	2.05989	35.56	1.71385	2.78931
35.58	3.54786	2.13145	35.58	1.71414	2.90365
35.6	3.55773	2.15046	35.6	1.68951	3.10912
35.62	3.54455	2.54381	35.62	1.67113	2.8829
35.64	3.48768	2.39839	35.64	1.70268	2.85013
35.66	3.57718	2.50034	35.66	1.65585	2.76095
35.68	3.54219	2.50185	35.68	1.8049	2.78501
35.7	3.57186	2.43291	35.7	1.778	2.92938
35.72	3.57061	2.30191	35.72	1.59837	2.96481
35.74	3.52836	2.31091	35.74	1.69496	2.7925
35.76	3.59042	2.39663	35.76	1.7164	2.14627
35.78	3.62266	2.276	35.78	1.81243	3.32567
35.8	3.61533	2.5108	35.8	1.72856	3.12493
35.82	3.55302	2.26593	35.82	1.66985	3.15389
35.84	3.57292	2.51209	35.84	1.64309	3.38359
35.86	3.51827	2.09745	35.86	1.71051	3.05819
35.88	3.55088	2.2504	35.88	1.68765	2.91495
35.9	3.51341	2.21426	35.9	1.75032	3.15595
35.92	3.61257	2.30511	35.92	1.74627	2.95439
35.94	3.56841	2.2575	35.94	1.64008	3.39196
35.96	3.55558	2.4275	35.96	1.55236	3.11074
35.98	3.52794	2.42683	35.98	1.67432	3.11735
36	3.57419	2.37983	36	1.6292	3.20777
36.02	3.53997	2.16696	36.02	1.55584	3.09732
36.04	3.34143	2.11838	36.04	1.53856	2.95871
36.06	3.43405	2.46449	36.06	1.50097	3.22737
36.08	3.43434	2.29018	36.08	1.41618	2.94155
36.1	3.46235	2.53722	36.1	1.62695	3.1078
36.12	3.40892	2.27224	36.12	1.59904	3.19283
36.14	3.38989	2.33583	36.14	1.5449	2.90545
36.16	3.41327	2.35671	36.16	1.47609	2.41936
36.18	3.44029	2.38345	36.18	1.61392	3.29248
36.2	3.42385	2.56433	36.2	1.56719	2.87779
36.22	3.44209	2.38689	36.22	1.65688	2.82375
36.24	3.45299	2.37125	36.24	1.52626	3.13712
36.26	3.47246	2.30758	36.26	1.53868	3.0645
36.28	3.50872	2.42938	36.28	1.53418	2.92192
36.3	3.53829	2.23304	36.3	1.5474	2.80417
36.32	3.52222	2.29644	36.32	1.50785	3.13521
36.34	3.49694	2.24395	36.34	1.59167	2.93495
36.36	3.41473	2.29336	36.36	1.51871	3.0401
36.38	3.44802	2.19532	36.38	1.72251	2.75208
36.4	3.369	2.18103	36.4	1.62397	2.98514
36.42	3.46897	2.49224	36.42	1.77951	3.06154
36.44	3.41604	2.36841	36.44	1.67813	3.14989
36.46	3.48534	2.39284	36.46	1.55781	3.00042
36.48	3.40413	2.28755	36.48	1.60777	2.91912
36.5	3.56079	2.3291	36.5	1.61504	2.79802
36.52	3.55258	2.38502	36.52	1.58685	2.48745
36.54	3.4851	2.43716	36.54	1.66416	2.04249
36.56	3.53261	2.36883	36.56	1.64283	1.97931
36.58	3.48148	2.84837	36.58	1.57473	1.9946
36.6	3.48434	2.85152	36.6	1.54466	1.38445
36.62	3.58494	2.71536	36.62	1.52089	0.967159
36.64	3.54388	2.58852	36.64	1.47895	1.20386
36.66	3.58643	2.65744	36.66	1.45682	1.09444
36.68	3.62217	2.79302	36.68	1.46912	1.32425
36.7	3.49643	2.93819	36.7	1.5409	1.31935
36.72	3.46028	2.70992	36.72	1.55295	1.43333
36.74	3.48167	2.72333	36.74	1.54238	1.18379
36.76	3.54365	2.87216	36.76	1.49196	1.14534
36.78	3.48679	2.83093	36.78	1.52889	1.19384
36.8	3.50602	2.69981	36.8	1.48605	1.12838
36.82	3.49752	2.81623	36.82	1.50269	1.18315
36.84	3.49426	2.70834	36.84	1.39742	1.06111
36.86	3.45496	2.83165	36.86	1.46324	0.854497
36.88	3.50748	2.91262	36.88	1.45813	1.17042
36.9	3.48914	2.73565	36.9	1.59976	0.914442
36.92	3.47616	2.66451	36.92	1.61176	0.765325
36.94	3.42565	2.66513	36.94	1.55867	1.11028
36.96	3.44783	2.72519	36.96	1.53658	1.00528
36.98	3.45334	2.74388	36.98	1.50782	1.16479
37	3.41433	2.93002	37	1.53592	1.21819
37.02	3.52977	3.1156	37.02	1.53815	1.59009
37.04	3.48948	3.10609	37.04	1.49236	1.24329
37.06	3.42888	3.07927	37.06	1.45496	1.38485
37.08	3.42961	3.14653	37.08	1.45578	1.31604
37.1	3.37254	3.15234	37.1	1.53146	1.36885
37.12	3.48661	2.9635	37.12	1.4748	1.17506
37.14	3.43874	2.91544	37.14	1.52535	1.24351
37.16	3.33465	3.05191	37.16	1.53111	1.28827
37.18	3.45555	2.74261	37.18	1.56999	1.22525
37.2	3.45468	3.21651	37.2	1.53936	1.44678
37.22	3.40333	3.04782	37.22	1.46288	1.34166
37.24	3.46106	3.28437	37.24	1.49444	1.22799
37.26	3.51313	3.27597	37.26	1.65571	1.43725
37.28	3.58605	3.02693	37.28	1.5767	1.02486
37.3	3.4811	3.03818	37.3	1.57907	1.78324
37.32	3.47065	3.05925	37.32	1.6266	1.36579
37.34	3.40447	3.14032	37.34	1.6	1.6434
37.36	3.42283	3.21988	37.36	1.64651	1.36655
37.38	3.44707	3.3416	37.38	1.57806	1.4238
37.4	3.49543	3.1632	37.4	1.43605	1.32266
37.42	3.60185	3.33141	37.42	1.5601	1.40193
37.44	3.51767	3.18996	37.44	1.57165	1.65308
37.46	3.50825	2.93682	37.46	1.57236	1.65825
37.48	3.46337	2.92836	37.48	1.56236	1.56576
37.5	3.54961	2.93999	37.5	1.56159	1.32542
37.52	3.40968	2.99256	37.52	1.55187	1.48828
37.54	3.47871	2.74738	37.54	1.50558	1.12999
37.56	3.44682	3.0036	37.56	1.65775	1.09443
37.58	3.45488	2.97059	37.58	1.55305	1.46779
37.6	3.45524	2.81068	37.6	1.51241	1.19483
37.62	3.47149	2.79885	37.62	1.51812	1.06363
37.64	3.43079	2.84397	37.64	1.57308	1.12372
37.66	3.44299	2.79696	37.66	1.65409	1.45996
37.68	3.3569	2.93239	37.68	1.50677	1.35834
37.7	3.46938	2.87548	37.7	1.47829	1.39947
37.72	3.41782	3.02178	37.72	1.4873	1.02946
37.74	3.47027	3.15533	37.74	1.43633	1.43377
37.76	3.39806	3.04694	37.76	1.50334	1.53841
37.78	3.38909	2.83299	37.78	1.49874	1.13436
37.8	3.41297	2.84772	37.8	1.4942	1.02457
37.82	3.40558	3.00532	37.82	1.57606	1.32951
37.84	3.38235	2.98991	37.84	1.55721	1.3884
37.86	3.37373	3.28796	37.86	1.48418	1.38291
37.88	3.46549	2.84186	37.88	1.48346	1.37815
37.9	3.42673	2.91418	37.9	1.53339	1.50525
37.92	3.43612	3.3212	37.92	1.45824	1.75935
37.94	3.43655	3.22458	37.94	1.48833	1.65498
37.96	3.49634	3.15987	37.96	1.42767	1.63945
37.98	3.35836	3.36348	37.98	1.4386	1.23959
38	3.43596	3.20433	38	1.48739	1.7058
38.02	3.35367	2.94117	38.02	1.47978	0.887647
38.04	3.43515	3.06893	38.04	1.43397	1.11784
38.06	3.47381	2.95766	38.06	1.46905	0.98514
38.08	3.48187	2.91776	38.08	1.49375	1.17425
38.1	3.45168	2.50438	38.1	1.42873	1.40528
38.12	3.48254	2.73492	38.12	1.44663	0.865342
38.14	3.44108	2.96778	38.14	1.53707	1.37081
38.16	3.4814	2.9082	38.16	1.50394	1.49827
38.18	3.47224	2.57741	38.18	1.38096	1.40849
38.2	3.46116	2.836	38.2	1.4484	1.38942
38.22	3.43824	2.8698	38.22	1.52325	1.44244
38.24	3.53229	2.94408	38.24	1.5185	1.47753
38.26	3.48766	2.91833	38.26	1.46291	1.54517
38.28	3.37773	3.11974	38.28	1.53589	1.62113
38.3	3.39226	3.18564	38.3	1.54682	1.5573
38.32	3.39973	2.91356	38.32	1.5917	1.30688
38.34	3.39043	2.83422	38.34	1.56258	1.28588
38.36	3.453	2.74002	38.36	1.70086	1.39874
38.38	3.44665	2.76592	38.38	1.65454	1.24643
38.4	3.51087	2.8586	38.4	1.56512	1.17571
38.42	3.59278	3.17609	38.42	1.57203	1.17977
38.44	3.53044	2.92421	38.44	1.54582	1.52981
38.46	3.54769	3.1884	38.46	1.56418	2.09561
38.48	3.53303	2.79241	38.48	1.56224	1.89744
38.5	3.41932	3.15301	38.5	1.63708	2.25856
38.52	3.41646	3.18027	38.52	1.59331	1.93972
38.54	3.38788	3.35687	38.54	1.59007	2.29143
38.56	3.39515	3.00967	38.56	1.49255	2.28713
38.58	3.3925	3.49153	38.58	1.35353	2.30339
38.6	3.43991	3.10504	38.6	1.47441	2.34168
38.62	3.41722	2.87305	38.62	1.529	2.1658
38.64	3.45622	3.13768	38.64	1.50298	1.84072
38.66	3.38635	2.9988	38.66	1.46248	2.03505
38.68	3.5636	2.97943	38.68	1.48042	1.83913
38.7	3.46535	2.84533	38.7	1.52534	1.7677
38.72	3.49975	2.19111	38.72	1.57655	2.03299
38.74	3.47974	2.14012	38.74	1.43017	2.25349
38.76	3.54158	2.44477	38.76	1.4152	2.10472
38.78	3.56486	2.23889	38.78	1.42107	1.91325
38.8	3.55629	2.26163	38.8	1.47285	1.85411
38.82	3.43134	2.15274	38.82	1.43482	1.46205
38.84	3.46651	2.67812	38.84	1.36819	1.61686
38.86	3.53079	2.32254	38.86	1.40403	1.80969
38.88	3.5779	2.27011	38.88	1.40631	2.54532
38.9	3.69738	2.29111	38.9	1.40441	2.19602
38.92	3.57805	2.28058	38.92	1.41399	2.30328
38.94	3.58665	2.4517	38.94	1.37336	2.7944
38.96	3.57573	2.2489	38.96	1.47506	2.66105
38.98	3.55106	2.0725	38.98	1.48678	2.62879
39	3.55264	2.33921	39	1.50318	1.98488
39.02	3.55052	2.27756	39.02	1.42092	2.31373
39.04	3.58333	2.08834	39.04	1.42126	1.60321
39.06	3.46965	2.494	39.06	1.40802	2.21082
39.08	3.50965	2.42732	39.08	1.36933	2.0948
39.1	3.41347	2.2577	39.1	1.43663	2.32019
39.12	3.52536	2.1673	39.12	1.44802	2.37791
39.14	3.49473	2.2241	39.14	1.42782	2.2128
39.16	3.52508	2.5418	39.16	1.46801	2.19954
39.18	3.46247	2.42646	39.18	1.31136	2.58878
39.2	3.57332	2.22816	39.2	1.36529	2.39366
39.22	3.57029	2.03995	39.22	1.40942	2.65299
39.24	3.58069	2.23432	39.24	1.40118	2.20591
39.26	3.61188	2.46819	39.26	1.40732	2.51839
39.28	3.6086	2.31673	39.28	1.40606	2.52445
39.3	3.4527	2.45744	39.3	1.38475	3.18327
39.32	3.4592	2.51185	39.32	1.38981	2.81802
39.34	3.46691	2.39019	39.34	1.38087	2.76808
39.36	3.45234	2.35575	39.36	1.44703	1.80331
39.38	3.43163	2.50451	39.38	1.36937	2.39779
39.4	3.48919	2.72255	39.4	1.38371	2.36525
39.42	3.4367	2.51516	39.42	1.39914	2.38471
39.44	3.4649	2.79314	39.44	1.487	2.27751
39.46	3.46361	2.65009	39.46	1.51708	2.14058
39.48	3.4471	2.81256	39.48	1.50494	2.1935
39.5	3.4847	2.54852	39.5	1.54226	2.45097
39.52	3.51268	2.55139	39.52	1.5128	2.21492
39.54	3.394	2.75894	39.54	1.55409	1.8769
39.56	3.39473	2.59818	39.56	1.54409	2.02556
39.58	3.3827	2.59029	39.58	1.5488	2.06461
39.6	3.36116	2.55696	39.6	1.55457	1.87511
39.62	3.3906	2.35113	39.62	1.40927	2.0103
39.64	3.46511	2.28387	39.64	1.38201	1.58592
39.66	3.50071	2.22378	39.66	1.55123	1.90315
39.68	3.41542	2.51668	39.68	1.50609	1.90181
39.7	3.46278	2.40048	39.7	1.52363	1.93387
39.72	3.40667	2.28708	39.72	1.39932	1.93503
39.74	3.44055	2.08533	39.74	1.53595	1.88911
39.76	3.4296	2.14661	39.76	1.4899	1.7889
39.78	3.46435	2.03489	39.78	1.47227	1.71009
39.8	3.532	2.21393	39.8	1.45464	1.9182
39.82	3.46141	2.00847	39.82	1.41981	2.11077
39.84	3.49336	2.07598	39.84	1.46352	1.74466
39.86	3.49906	2.18458	39.86	1.40216	1.82745
39.88	3.49702	2.19566	39.88	1.43604	1.49526
39.9	3.46619	2.55345	39.9	1.35831	1.19875
39.92	3.3384	2.29256	39.92	1.39426	1.22321
39.94	3.37658	2.69917	39.94	1.37419	1.47998
39.96	3.48136	2.73294	39.96	1.371	2.25536
39.98	3.43096	2.46651	39.98	1.46796	2.62708
[truncated: 502 more rows]

## Sheet: Irbesartan
Time (ns)	protein_ARG1	LIG_Irbesartan	Time (ns)	protein_ARG2	LIG_Irbesartan
0.02	0.833543	0.685105	0.02	0.733555	1.30668
0.04	0.997949	0.806898	0.04	0.789092	1.3945
0.06	1.08934	1.25939	0.06	0.917421	1.2972
0.08	1.13589	1.24619	0.08	0.806015	1.30793
0.1	1.0911	2.35414	0.1	0.852018	1.34047
0.12	1.25259	2.51475	0.12	0.898986	1.28713
0.14	1.26869	2.34059	0.14	0.906554	1.3195
0.16	1.1232	2.38121	0.16	0.937117	1.55425
0.18	1.19923	2.90202	0.18	0.864443	1.23366
0.2	1.16469	3.1575	0.2	0.855304	0.987794
0.22	1.37853	3.22248	0.22	0.973618	1.10481
0.24	1.33606	3.17637	0.24	0.930698	0.838445
0.26	1.34077	3.16114	0.26	1.02174	1.16432
0.28	1.36795	3.07619	0.28	1.02281	1.20004
0.3	1.5226	3.07866	0.3	1.08711	0.885081
0.32	1.47231	3.04444	0.32	1.11925	1.46375
0.34	1.46965	2.93982	0.34	1.21088	1.47998
0.36	1.69678	2.9307	0.36	1.04446	1.82732
0.38	1.6886	2.78491	0.38	1.09591	1.94474
0.4	1.74322	2.8386	0.4	1.19104	1.86034
0.42	1.88017	2.72013	0.42	1.21633	1.81525
0.44	2.16581	2.78778	0.44	1.25563	1.81825
0.46	2.19145	2.35251	0.46	1.34513	1.74713
0.48	2.42676	2.14207	0.48	1.22456	1.42564
0.5	2.45467	2.58351	0.5	1.2984	0.932482
0.52	2.4582	2.54572	0.52	1.33701	1.34831
0.54	2.61906	2.54124	0.54	1.49817	1.04206
0.56	2.48075	2.03677	0.56	1.30102	1.19065
0.58	2.54427	2.38655	0.58	1.21945	2.43493
0.6	2.6618	2.26486	0.6	1.25073	1.74169
0.62	2.50413	1.98684	0.62	1.16348	1.90066
0.64	2.66989	2.13287	0.64	1.09091	2.04908
0.66	2.60877	2.06442	0.66	1.13867	2.52234
0.68	2.9656	2.26779	0.68	1.18101	2.51871
0.7	2.89487	2.00104	0.7	1.1811	2.3778
0.72	2.96877	2.46004	0.72	1.19126	2.03682
0.74	3.11162	2.63177	0.74	1.13854	1.84044
0.76	3.04989	2.86664	0.76	1.21269	2.2677
0.78	2.9825	2.83795	0.78	1.26537	2.03915
0.8	2.81739	2.9597	0.8	1.24139	2.0163
0.82	2.76494	2.85778	0.82	1.26547	2.36836
0.84	2.69081	2.45496	0.84	1.17519	2.16434
0.86	2.95818	2.20383	0.86	1.18889	2.69658
0.88	2.62121	2.23129	0.88	1.20631	3.09027
0.9	2.48188	2.00913	0.9	1.25139	3.19609
0.92	2.5559	2.71045	0.92	1.33575	3.00648
0.94	2.47461	2.00919	0.94	1.33814	2.73011
0.96	2.47695	1.85331	0.96	1.26039	2.95485
0.98	2.67445	1.8733	0.98	1.23022	2.93193
1	2.59217	1.66752	1	1.29322	2.25943
1.02	2.81233	3.10958	1.02	1.3315	2.41571
1.04	2.96667	3.05221	1.04	1.28011	2.74081
1.06	2.88982	3.21217	1.06	1.39266	2.29324
1.08	2.80368	3.27586	1.08	1.30243	2.94411
1.1	2.93358	3.19796	1.1	1.36801	2.93248
1.12	3.19038	3.23142	1.12	1.31665	2.88156
1.14	3.13789	3.02124	1.14	1.27243	2.92557
1.16	3.16665	2.97626	1.16	1.20989	2.93919
1.18	3.17661	3.32427	1.18	1.31263	2.91993
1.2	3.32073	3.22765	1.2	1.42381	3.03312
1.22	3.33937	3.28519	1.22	1.35806	2.62486
1.24	3.19496	3.03695	1.24	1.34656	2.47892
1.26	3.1036	2.7041	1.26	1.27367	3.12017
1.28	3.21722	2.79268	1.28	1.29913	3.19863
1.3	3.16909	2.56434	1.3	1.31863	3.19014
1.32	3.18642	2.63899	1.32	1.37609	3.14915
1.34	2.9783	2.98625	1.34	1.4751	2.64425
1.36	3.00441	3.26886	1.36	1.34743	1.95744
1.38	3.0238	2.58736	1.38	1.34227	2.04318
1.4	3.17246	2.75931	1.4	1.30073	2.35556
1.42	3.20614	2.0228	1.42	1.38821	1.60231
1.44	3.2174	1.91279	1.44	1.46394	1.76322
1.46	3.11258	1.6716	1.46	1.48776	1.58093
1.48	3.15093	2.08255	1.48	1.50483	1.51727
1.5	3.20964	2.26363	1.5	1.45792	2.12898
1.52	3.24905	2.42972	1.52	1.47831	1.47158
1.54	3.08118	2.69275	1.54	1.28972	1.8468
1.56	3.03621	2.39962	1.56	1.33184	1.89221
1.58	2.88297	1.97066	1.58	1.27395	1.88564
1.6	2.84702	2.3315	1.6	1.27273	2.1546
1.62	2.87128	2.43	1.62	1.38489	1.97798
1.64	2.78715	2.25116	1.64	1.4551	1.69288
1.66	2.95702	2.27796	1.66	1.42237	1.54994
1.68	2.99097	2.53556	1.68	1.33516	1.69131
1.7	2.98431	2.28479	1.7	1.36479	1.62641
1.72	3.08442	2.59528	1.72	1.34	1.73039
1.74	3.13103	2.12599	1.74	1.3733	1.79444
1.76	3.01579	2.0974	1.76	1.26934	1.71837
1.78	3.02527	2.03976	1.78	1.28543	1.45453
1.8	3.07502	2.81942	1.8	1.19764	1.54251
1.82	3.07432	2.41004	1.82	1.2788	1.73976
1.84	3.12182	2.37529	1.84	1.28535	1.96889
1.86	3.20206	2.45779	1.86	1.27603	1.79166
1.88	3.26539	2.82877	1.88	1.27019	1.72256
1.9	3.41927	3.13363	1.9	1.28561	1.45976
1.92	3.41565	3.20031	1.92	1.34841	1.81847
1.94	3.25064	2.54804	1.94	1.28732	1.93876
1.96	3.15763	3.17346	1.96	1.36895	2.41695
1.98	3.26849	2.85766	1.98	1.31931	1.91968
2	3.22802	2.37752	2	1.27545	1.68536
2.02	3.14898	2.32343	2.02	1.34205	1.84427
2.04	3.0698	2.457	2.04	1.25104	1.69599
2.06	3.10969	2.13507	2.06	1.21861	2.03414
2.08	3.30282	1.99034	2.08	1.27836	1.50783
2.1	2.99958	1.49693	2.1	1.31905	1.70377
2.12	3.16345	1.66601	2.12	1.30567	1.61045
2.14	3.11845	1.43776	2.14	1.4008	1.68027
2.16	3.15016	1.58217	2.16	1.25888	1.88117
2.18	3.10846	1.62764	2.18	1.3218	2.21513
2.2	3.13046	1.21748	2.2	1.28643	2.11624
2.22	3.32335	1.53415	2.22	1.29683	2.04557
2.24	3.23622	1.72631	2.24	1.35311	1.8531
2.26	3.15817	1.41428	2.26	1.41778	1.87138
2.28	3.12818	1.00002	2.28	1.37961	1.98439
2.3	2.79793	1.45103	2.3	1.36722	1.92412
2.32	3.0539	1.26862	2.32	1.33161	1.9211
2.34	3.00664	1.12439	2.34	1.34241	1.74597
2.36	2.98368	1.11753	2.36	1.41069	2.00853
2.38	3.08488	1.19672	2.38	1.34644	2.14794
2.4	3.02822	1.58771	2.4	1.31048	1.29034
2.42	3.15075	2.00545	2.42	1.39661	0.565263
2.44	3.2155	1.54759	2.44	1.45739	0.539498
2.46	3.23978	2.04397	2.46	1.39868	0.944665
2.48	3.43153	2.05865	2.48	1.53099	1.01523
2.5	3.33052	2.3176	2.5	1.46725	1.34907
2.52	3.52143	2.26496	2.52	1.45046	1.53292
2.54	3.51002	1.28885	2.54	1.55536	2.108
2.56	3.55735	1.83109	2.56	1.50435	2.63288
2.58	3.54253	2.52984	2.58	1.56948	2.56888
2.6	3.35159	1.83745	2.6	1.56991	3.16692
2.62	3.31861	1.63546	2.62	1.43475	2.84832
2.64	3.44328	1.28934	2.64	1.44405	2.84877
2.66	3.5543	2.27725	2.66	1.33893	2.38659
2.68	3.55043	2.27828	2.68	1.38064	2.43456
2.7	3.46599	1.70574	2.7	1.40448	3.06669
2.72	3.44704	3.23519	2.72	1.34138	3.09477
2.74	3.43542	3.15761	2.74	1.40847	3.17537
2.76	3.50521	3.0262	2.76	1.36247	2.85351
2.78	3.44726	3.13482	2.78	1.58757	2.73378
2.8	3.55944	3.0799	2.8	1.50058	2.69817
2.82	3.59248	3.15296	2.82	1.49105	2.89816
2.84	3.42474	3.01438	2.84	1.4289	3.03689
2.86	3.41049	2.85745	2.86	1.44942	2.34145
2.88	3.40562	2.47603	2.88	1.49104	2.62458
2.9	3.14528	2.85979	2.9	1.61964	2.81909
2.92	3.26952	3.23412	2.92	1.61689	2.95708
2.94	2.90835	3.03702	2.94	1.673	3.08211
2.96	2.92851	2.96915	2.96	1.47715	2.726
2.98	2.78931	2.85418	2.98	1.5832	2.40592
3	3.00537	2.73533	3	1.546	2.87329
3.02	3.05971	2.63615	3.02	1.5459	2.95591
3.04	3.22673	2.7305	3.04	1.45928	2.6186
3.06	3.29709	2.84252	3.06	1.40655	2.90352
3.08	3.31894	2.29486	3.08	1.50063	3.06081
3.1	3.1587	2.34299	3.1	1.39736	3.24587
3.12	3.29736	2.63318	3.12	1.45479	3.17974
3.14	3.34702	2.95221	3.14	1.36882	3.17749
3.16	3.45175	2.96229	3.16	1.38728	3.29448
3.18	3.34587	2.75341	3.18	1.35882	3.03923
3.2	3.46942	2.92128	3.2	1.36329	2.5423
3.22	3.45989	2.8008	3.22	1.31956	2.76388
3.24	3.54295	2.54022	3.24	1.34725	2.88524
3.26	3.50181	2.614	3.26	1.36561	2.88111
3.28	3.53826	2.47142	3.28	1.29078	2.02224
3.3	3.47096	2.78505	3.3	1.26766	3.11724
3.32	3.59982	2.64878	3.32	1.26354	3.19782
3.34	3.5275	2.43645	3.34	1.28277	2.8331
3.36	3.44874	2.39934	3.36	1.17838	3.2663
3.38	3.3623	2.9494	3.38	1.32429	2.93678
3.4	3.46007	2.93624	3.4	1.31817	3.01335
3.42	3.39731	2.87218	3.42	1.38558	3.08759
3.44	3.53893	2.78448	3.44	1.36519	2.67604
3.46	3.59364	2.88967	3.46	1.32103	3.20433
3.48	3.50092	2.81123	3.48	1.33374	3.08155
3.5	3.49606	2.79789	3.5	1.42008	3.05903
3.52	3.60848	1.22516	3.52	1.34314	2.91715
3.54	3.43313	1.33077	3.54	1.42594	2.95172
3.56	3.54256	1.9902	3.56	1.53902	3.02523
3.58	3.35828	1.84958	3.58	1.46432	3.11438
3.6	3.31299	2.29971	3.6	1.56071	3.01234
3.62	3.21602	2.41741	3.62	1.56998	3.06408
3.64	3.1495	2.63586	3.64	1.61199	3.45194
3.66	3.18876	2.43582	3.66	1.50588	2.75297
3.68	3.35549	2.44425	3.68	1.52961	2.52452
3.7	3.19323	2.00962	3.7	1.69448	2.62802
3.72	3.05145	2.09558	3.72	1.55963	2.12464
3.74	3.148	1.41457	3.74	1.53456	2.855
3.76	3.36805	1.76679	3.76	1.47343	2.95349
3.78	3.24469	1.66844	3.78	1.60241	3.06743
3.8	3.08704	2.011	3.8	1.5255	3.14095
3.82	3.28027	2.4012	3.82	1.49844	3.04845
3.84	3.32387	1.90789	3.84	1.54263	3.055
3.86	3.23397	2.08686	3.86	1.47288	3.06842
3.88	3.13167	1.99882	3.88	1.51169	3.02685
3.9	3.02481	1.26629	3.9	1.3922	2.84417
3.92	3.0502	1.18136	3.92	1.43633	2.80093
3.94	3.07187	1.03369	3.94	1.50025	3.07726
3.96	3.0342	1.46562	3.96	1.46037	2.97174
3.98	2.9177	0.993259	3.98	1.54002	3.21873
4	2.85645	1.74084	4	1.52824	3.0678
4.02	2.93977	0.532164	4.02	1.48663	3.1182
4.04	2.86016	1.73421	4.04	1.53748	3.13097
4.06	2.88022	2.12994	4.06	1.46121	3.27537
4.08	3.05916	1.2648	4.08	1.52106	3.0222
4.1	3.00655	1.74064	4.1	1.5825	2.99882
4.12	3.16915	1.71099	4.12	1.53218	3.0707
4.14	3.33177	2.09499	4.14	1.44531	2.92092
4.16	3.30426	1.62672	4.16	1.56262	3.28738
4.18	3.40857	2.73149	4.18	1.63244	3.18105
4.2	3.36714	2.19422	4.2	1.54725	3.00427
4.22	3.21365	2.45268	4.22	1.70705	3.06813
4.24	3.06195	1.84431	4.24	1.81362	3.16834
4.26	3.10492	2.67121	4.26	1.77685	3.03118
4.28	3.14653	1.76251	4.28	1.62609	1.91291
4.3	3.42733	2.56927	4.3	1.59508	1.76457
4.32	3.63116	2.59798	4.32	1.55001	1.9577
4.34	3.42919	2.23131	4.34	1.82727	2.02768
4.36	3.60266	1.96742	4.36	1.64818	2.14902
4.38	3.60602	2.00716	4.38	1.73008	1.71373
4.4	3.57067	1.3766	4.4	1.72652	1.67341
4.42	3.64372	1.86843	4.42	1.63691	1.75927
4.44	3.67473	1.69072	4.44	1.75986	1.68902
4.46	3.64376	1.34986	4.46	1.69412	2.15025
4.48	3.64231	2.203	4.48	1.75839	1.99414
4.5	3.68782	1.17474	4.5	1.83371	1.42831
4.52	3.68726	2.52042	4.52	1.73119	0.935463
4.54	3.42476	0.99464	4.54	1.71969	1.95537
4.56	3.39969	1.16071	4.56	1.58424	1.53145
4.58	3.43631	1.02107	4.58	1.69899	2.13719
4.6	3.55603	1.79912	4.6	1.52994	1.94194
4.62	3.52473	1.4758	4.62	1.77949	1.80391
4.64	3.4941	1.53616	4.64	1.77561	1.62501
4.66	3.35279	2.06151	4.66	1.75359	1.76767
4.68	3.16599	1.23509	4.68	1.74122	1.36781
4.7	3.44361	2.43823	4.7	1.85208	1.43513
4.72	3.18322	1.32625	4.72	1.82249	2.14095
4.74	2.94671	2.09447	4.74	1.80522	1.52681
4.76	2.91281	2.16452	4.76	1.76623	1.53777
4.78	2.8391	1.68724	4.78	1.68193	1.86577
4.8	2.92217	3.01537	4.8	1.79033	1.78647
4.82	2.96775	2.84953	4.82	1.77873	1.59765
4.84	2.82545	2.72449	4.84	1.71283	1.73047
4.86	3.07849	3.15988	4.86	1.71368	1.59864
4.88	2.83787	3.13277	4.88	1.72251	2.20395
4.9	2.97015	2.7161	4.9	1.64827	1.91479
4.92	2.88096	2.77299	4.92	1.83213	1.55253
4.94	3.02335	2.97867	4.94	1.78171	1.90652
4.96	3.0067	3.56779	4.96	1.70336	1.43623
4.98	3.00348	3.21874	4.98	1.76125	1.89577
5	3.0602	2.43682	5	1.57648	2.9102
5.02	3.21547	2.51206	5.02	1.73062	3.14281
5.04	3.26059	3.17598	5.04	1.69865	3.31372
5.06	3.02861	3.22763	5.06	1.74726	3.24265
5.08	2.88399	3.49057	5.08	1.57073	2.70591
5.1	2.93365	2.6829	5.1	1.83919	2.83485
5.12	3.09821	2.42865	5.12	1.72311	3.01578
5.14	3.16922	2.82847	5.14	1.67579	3.21875
5.16	3.05147	3.07705	5.16	1.77193	3.11067
5.18	3.09284	2.60125	5.18	1.75562	2.79953
5.2	3.02459	2.51129	5.2	1.64404	2.79003
5.22	3.00199	2.84135	5.22	1.702	2.52804
5.24	2.81923	1.1868	5.24	1.6975	2.90535
5.26	2.81683	1.2822	5.26	1.76251	2.58491
5.28	2.60868	1.08475	5.28	1.84732	2.88974
5.3	2.64417	0.90478	5.3	1.82578	2.0242
5.32	2.58927	1.26398	5.32	1.8952	1.13037
5.34	2.60581	1.56704	5.34	1.77559	1.32252
5.36	2.68376	2.58892	5.36	1.75842	1.61333
5.38	2.68672	2.60716	5.38	1.72279	1.6462
5.4	2.55473	2.61868	5.4	1.64371	1.69277
5.42	2.63937	3.05067	5.42	1.74905	1.50642
5.44	2.45641	2.50856	5.44	1.74281	1.50635
5.46	2.47206	2.56977	5.46	1.55303	1.5904
5.48	2.49191	2.36173	5.48	1.72026	2.07942
5.5	2.59242	2.96597	5.5	1.61424	1.80098
5.52	2.47162	2.9085	5.52	1.60066	1.74645
5.54	2.46021	2.60707	5.54	1.5577	2.36524
5.56	2.50748	2.45151	5.56	1.48317	1.5003
5.58	2.521	2.53194	5.58	1.57338	2.24099
5.6	2.33276	2.58848	5.6	1.52387	2.36648
5.62	2.56364	2.55688	5.62	1.47934	2.86428
5.64	2.59716	2.58384	5.64	1.76804	2.10113
5.66	2.45761	2.82106	5.66	1.83496	2.10761
5.68	2.47543	2.90274	5.68	1.60021	1.97339
5.7	2.4337	2.98107	5.7	1.59108	1.98707
5.72	2.42373	2.9237	5.72	1.49867	1.48838
5.74	2.34927	2.57498	5.74	1.53866	2.12514
5.76	2.35835	2.6569	5.76	1.50576	1.78044
5.78	2.356	2.75691	5.78	1.54698	2.02693
5.8	2.35152	2.8979	5.8	1.63533	1.89819
5.82	2.40167	2.25381	5.82	1.78817	2.66708
5.84	2.46792	2.60315	5.84	1.68843	2.79225
5.86	2.43543	2.57534	5.86	1.60767	2.90225
5.88	2.61999	2.74765	5.88	1.65725	3.00259
5.9	2.57103	2.59466	5.9	1.64868	3.15755
5.92	2.55869	2.88127	5.92	1.73359	2.81689
5.94	2.57805	2.77063	5.94	1.73848	3.04994
5.96	2.68553	2.63419	5.96	1.56078	2.84953
5.98	2.82356	2.45544	5.98	1.50931	3.00141
6	2.63563	2.3739	6	1.56277	3.18808
6.02	2.76319	2.33249	6.02	1.56265	3.07052
6.04	2.80155	2.68367	6.04	1.47139	2.9889
6.06	2.67516	2.87976	6.06	1.4635	2.89892
6.08	2.49865	2.65401	6.08	1.4571	3.19537
6.1	2.75597	2.29161	6.1	1.49129	3.01935
6.12	2.81402	2.95644	6.12	1.59661	2.90423
6.14	2.80606	3.10458	6.14	1.54096	3.13294
6.16	2.7902	2.58493	6.16	1.57135	3.0905
6.18	2.93985	2.70623	6.18	1.45799	2.96717
6.2	2.90074	2.98175	6.2	1.60028	2.92193
6.22	2.88235	2.52475	6.22	1.63255	2.95498
6.24	2.91798	2.91108	6.24	1.61604	2.96432
6.26	2.8278	2.80181	6.26	1.49631	2.52363
6.28	3.06139	2.91105	6.28	1.63778	3.13462
6.3	2.94487	2.64565	6.3	1.52565	3.12405
6.32	2.83426	2.94013	6.32	1.45093	2.79094
6.34	2.82604	2.56352	6.34	1.36156	2.97375
6.36	2.7474	2.88837	6.36	1.4937	2.76242
6.38	2.69383	2.85103	6.38	1.51282	3.23342
6.4	2.67787	2.85635	6.4	1.55589	3.11463
6.42	2.73218	2.92935	6.42	1.44288	2.88115
6.44	2.75716	2.89671	6.44	1.38842	3.03219
6.46	2.61297	2.86579	6.46	1.38617	2.76893
6.48	2.57812	2.72175	6.48	1.41098	3.28872
6.5	2.40295	2.21966	6.5	1.36268	2.96413
6.52	2.21757	2.56175	6.52	1.35602	3.05817
6.54	2.49408	2.7008	6.54	1.39108	2.41414
6.56	2.3855	2.92373	6.56	1.35354	2.75263
6.58	2.33192	2.94037	6.58	1.39145	3.10315
6.6	2.43955	3.09392	6.6	1.44448	3.03239
6.62	2.32776	2.60978	6.62	1.45137	2.24969
6.64	2.2894	2.51118	6.64	1.39322	2.77834
6.66	2.43145	1.80134	6.66	1.49043	2.10299
6.68	2.23532	1.84025	6.68	1.41185	1.52464
6.7	2.39699	2.37707	6.7	1.37568	1.91471
6.72	2.36973	2.10555	6.72	1.34994	1.90544
6.74	2.40711	1.47574	6.74	1.35399	2.09908
6.76	2.43715	2.0547	6.76	1.36452	1.75928
6.78	2.2853	2.35611	6.78	1.31599	2.61222
6.8	2.21394	2.3515	6.8	1.36642	1.87593
6.82	2.21394	2.2759	6.82	1.49322	2.19982
6.84	2.15546	2.4664	6.84	1.42405	1.91742
6.86	2.21499	2.76544	6.86	1.43509	2.02216
6.88	2.09078	2.53131	6.88	1.46832	1.85634
6.9	2.25693	2.56929	6.9	1.41708	2.02208
6.92	2.03045	2.95614	6.92	1.51951	2.3169
6.94	1.93948	2.70063	6.94	1.43891	2.87995
6.96	1.93955	2.4676	6.96	1.57351	3.09021
6.98	1.9511	2.01829	6.98	1.32898	3.27964
7	1.86104	2.51264	7	1.37349	2.79229
7.02	1.74118	2.20739	7.02	1.37198	3.1999
7.04	1.72999	2.66804	7.04	1.33039	3.20295
7.06	1.8859	2.24508	7.06	1.38991	3.27413
7.08	1.81083	1.82292	7.08	1.35285	3.06415
7.1	1.74022	2.3564	7.1	1.37543	3.36477
7.12	1.83333	2.23848	7.12	1.35044	3.10674
7.14	2.00347	2.48538	7.14	1.38126	3.42424
7.16	1.95227	3.07114	7.16	1.34792	3.18597
7.18	1.96729	2.70396	7.18	1.29487	3.36279
7.2	1.92844	1.67172	7.2	1.31256	3.25334
7.22	1.90721	1.51701	7.22	1.26848	3.21312
7.24	2.07088	1.26599	7.24	1.24262	3.23657
7.26	1.891	2.91845	7.26	1.23385	3.2879
7.28	1.84341	3.06796	7.28	1.2147	3.13465
7.3	1.88819	2.7781	7.3	1.31754	2.9395
7.32	1.88254	3.19243	7.32	1.25422	3.3554
7.34	1.88819	3.4305	7.34	1.40489	3.18313
7.36	1.82326	2.88608	7.36	1.43993	2.98624
7.38	1.77463	2.81308	7.38	1.4331	3.05304
7.4	1.80686	2.64693	7.4	1.44129	3.24619
7.42	1.77306	2.45558	7.42	1.38891	3.04411
7.44	1.68723	2.7919	7.44	1.39782	2.72574
7.46	1.69427	2.64665	7.46	1.33567	3.00326
7.48	1.74457	2.89406	7.48	1.28245	3.23793
7.5	1.73926	3.00209	7.5	1.24764	3.06351
7.52	1.85353	2.45192	7.52	1.26964	3.1258
7.54	1.85911	2.4743	7.54	1.29619	3.09204
7.56	1.86011	2.69712	7.56	1.40448	2.98324
7.58	1.93116	2.80113	7.58	1.40021	2.90762
7.6	1.91205	2.19157	7.6	1.37147	2.63771
7.62	1.98992	2.90627	7.62	1.35547	2.37555
7.64	1.8234	2.89836	7.64	1.41125	1.73107
7.66	1.84653	2.62015	7.66	1.37161	1.90175
7.68	2.00483	2.3783	7.68	1.37385	2.16858
7.7	1.99811	2.53986	7.7	1.42571	1.81923
7.72	2.02572	2.84033	7.72	1.48942	2.64016
7.74	2.18188	2.4461	7.74	1.42664	1.96951
7.76	2.10936	2.57741	7.76	1.25689	1.47825
7.78	2.12693	2.63798	7.78	1.43594	1.35711
7.8	2.10953	2.70071	7.8	1.25575	1.87455
7.82	2.10581	2.63264	7.82	1.3216	1.88919
7.84	2.11081	2.53936	7.84	1.48401	2.05143
7.86	2.26807	2.61695	7.86	1.40685	1.95147
7.88	2.19513	2.81855	7.88	1.39065	2.10811
7.9	2.27294	2.77202	7.9	1.47003	2.11909
7.92	2.44686	2.97149	7.92	1.45969	2.22575
7.94	2.35452	2.69973	7.94	1.46992	1.99591
7.96	2.37103	2.7058	7.96	1.36202	1.86767
7.98	2.32406	2.79231	7.98	1.35724	2.02386
8	2.09235	3.02315	8	1.34363	1.9632
8.02	2.06256	2.47722	8.02	1.32175	2.02984
8.04	2.2761	2.78818	8.04	1.22547	2.08403
8.06	2.23104	2.75792	8.06	1.30263	1.79768
8.08	2.24501	2.29304	8.08	1.40498	2.20627
8.1	2.26983	2.93072	8.1	1.30086	1.77415
8.12	2.33362	2.49691	8.12	1.29592	1.76051
8.14	2.29437	2.41209	8.14	1.30202	1.73387
8.16	2.24745	2.65172	8.16	1.27373	1.4901
8.18	2.19861	2.83769	8.18	1.26001	2.23479
8.2	2.24846	2.83718	8.2	1.34755	1.9889
8.22	2.15556	2.88815	8.22	1.25	2.9763
8.24	1.99426	2.9718	8.24	1.30256	2.40031
8.26	2.13009	2.64969	8.26	1.335	2.13958
8.28	2.1869	2.73599	8.28	1.23101	2.11356
8.3	2.39227	2.54579	8.3	1.28304	1.83325
8.32	2.43518	2.70351	8.32	1.29153	2.01238
8.34	2.54811	2.86969	8.34	1.35811	1.99053
8.36	2.61723	2.98677	8.36	1.28346	1.74688
8.38	2.64889	2.89964	8.38	1.25678	0.990681
8.4	2.57519	2.97747	8.4	1.22539	1.43251
8.42	2.48067	2.90035	8.42	1.21876	1.44191
8.44	2.46417	2.43089	8.44	1.32736	1.06363
8.46	2.56161	3.07513	8.46	1.33027	2.09903
8.48	2.76473	3.18203	8.48	1.38895	2.10513
8.5	2.43012	3.02659	8.5	1.36663	1.8385
8.52	2.50778	3.09769	8.52	1.26969	1.65744
8.54	2.64459	3.12152	8.54	1.38934	2.08011
8.56	2.47394	3.10497	8.56	1.26854	1.80399
8.58	2.82739	3.13243	8.58	1.29037	1.8691
8.6	2.87707	2.76783	8.6	1.27905	1.84329
8.62	2.88489	2.99849	8.62	1.28204	1.8542
8.64	3.17713	2.97321	8.64	1.31619	2.32315
8.66	3.07037	2.8847	8.66	1.35565	1.94297
8.68	3.07191	2.9256	8.68	1.24105	1.56503
8.7	3.08426	3.05212	8.7	1.31467	1.76063
8.72	3.04612	2.85713	8.72	1.31327	1.8002
8.74	3.08403	2.9108	8.74	1.39093	1.52785
8.76	2.98414	3.02565	8.76	1.32114	1.77973
8.78	3.16436	2.84478	8.78	1.30773	1.87063
8.8	3.16472	3.07461	8.8	1.423	2.20393
8.82	2.8509	3.08186	8.82	1.33531	1.92172
8.84	2.94832	2.9995	8.84	1.36941	1.73736
8.86	2.94042	2.95895	8.86	1.30931	1.24306
8.88	3.04515	2.12952	8.88	1.3747	1.78244
8.9	3.22236	1.61227	8.9	1.30882	1.46138
8.92	3.14722	2.31352	8.92	1.30189	1.36381
8.94	2.95655	1.60772	8.94	1.2633	1.60986
8.96	2.84285	1.78625	8.96	1.32728	2.26591
8.98	2.87425	2.75728	8.98	1.25544	2.30794
9	2.73442	2.81764	9	1.29447	3.07862
9.02	2.63896	3.29626	9.02	1.40729	3.24367
9.04	2.74519	2.80779	9.04	1.25118	3.02615
9.06	2.50244	2.96584	9.06	1.30476	3.1005
9.08	2.25833	2.88134	9.08	1.24232	3.06512
9.1	2.28467	2.71291	9.1	1.352	3.07703
9.12	2.5115	2.0934	9.12	1.25661	3.08817
9.14	2.48052	2.50025	9.14	1.26073	3.0252
9.16	2.53919	2.9776	9.16	1.29804	3.14552
9.18	2.5689	2.50952	9.18	1.44312	2.79884
9.2	2.44063	2.51998	9.2	1.50228	3.13329
9.22	2.50402	2.37945	9.22	1.38355	3.08898
9.24	2.41987	3.04535	9.24	1.42301	3.18334
9.26	2.41024	2.59577	9.26	1.54551	2.99067
9.28	2.53374	2.32207	9.28	1.54231	3.1261
9.3	2.53346	3.05212	9.3	1.51371	3.09856
9.32	2.64403	2.6549	9.32	1.53646	3.08554
9.34	2.63516	3.15278	9.34	1.41272	3.09186
9.36	2.46967	2.40718	9.36	1.48642	2.88447
9.38	2.43059	2.49558	9.38	1.4151	2.75559
9.4	2.34463	2.84281	9.4	1.48254	2.96226
9.42	2.42644	2.10541	9.42	1.38352	3.05858
9.44	2.36268	2.69365	9.44	1.45307	3.14002
9.46	2.32241	2.64645	9.46	1.48437	2.6477
9.48	2.24499	2.68441	9.48	1.47775	3.16005
9.5	2.20338	2.74448	9.5	1.35766	3.16974
9.52	2.23919	2.46557	9.52	1.46224	3.34177
9.54	2.25806	2.39468	9.54	1.39903	3.0095
9.56	2.357	3.03276	9.56	1.46242	3.00836
9.58	2.29137	3.22056	9.58	1.3377	3.28832
9.6	2.57448	3.22765	9.6	1.34861	2.68134
9.62	2.65299	2.7054	9.62	1.37854	3.04247
9.64	2.64269	2.70923	9.64	1.32596	2.61778
9.66	3.05286	2.62113	9.66	1.22125	3.00153
9.68	2.8849	2.83184	9.68	1.25413	1.96263
9.7	2.91565	2.90574	9.7	1.30758	1.65077
9.72	2.79381	2.79536	9.72	1.31207	2.12394
9.74	2.95062	3.0437	9.74	1.30719	2.07223
9.76	2.84111	3.04003	9.76	1.31336	2.15752
9.78	2.8136	2.86484	9.78	1.35426	1.61284
9.8	2.82181	2.87836	9.8	1.35036	2.66149
9.82	2.75301	2.64033	9.82	1.26178	2.45933
9.84	2.89003	2.87233	9.84	1.30615	2.23973
9.86	2.79366	2.5861	9.86	1.34811	1.48778
9.88	3.11836	2.96001	9.88	1.32169	1.73921
9.9	3.02035	2.79672	9.9	1.41128	1.88333
9.92	2.95413	2.9032	9.92	1.35526	1.71681
9.94	3.11916	1.47904	9.94	1.27156	1.90397
9.96	2.86141	1.55368	9.96	1.49921	1.66274
9.98	2.88556	1.12537	9.98	1.35868	1.5663
10	2.83098	1.70669	10	1.37099	1.9274
10.02	2.69564	2.31132	10.02	1.38722	1.73351
10.04	2.7172	1.77718	10.04	1.4537	1.58272
10.06	2.79825	1.18394	10.06	1.44931	1.44913
10.08	2.77539	1.64455	10.08	1.45834	1.94823
10.1	2.58996	1.66769	10.1	1.35425	1.99624
10.12	2.7401	1.81463	10.12	1.35382	1.95319
10.14	2.96896	1.51262	10.14	1.27068	1.79649
10.16	2.67085	1.56305	10.16	1.2917	2.27365
10.18	2.58388	1.91463	10.18	1.35006	1.84777
10.2	2.63427	2.09481	10.2	1.41241	2.26847
10.22	2.49556	2.81746	10.22	1.39845	1.79294
10.24	2.47462	2.04658	10.24	1.29626	2.22834
10.26	2.3759	3.07029	10.26	1.30169	1.89102
10.28	2.42054	3.12874	10.28	1.3848	1.73344
10.3	2.61247	2.50971	10.3	1.31079	2.15053
10.32	2.48062	2.96098	10.32	1.24087	2.11488
10.34	2.53823	3.04197	10.34	1.38756	2.66765
10.36	2.57055	2.84862	10.36	1.36585	1.37962
10.38	2.53858	2.79307	10.38	1.31995	1.50933
10.4	2.63405	3.53048	10.4	1.29989	1.66351
10.42	2.59219	3.78777	10.42	1.29232	2.69916
10.44	2.85808	3.80929	10.44	1.27524	2.23618
10.46	2.8881	3.99352	10.46	1.27454	2.00307
10.48	2.93882	3.93713	10.48	1.33105	1.65365
10.5	2.82657	3.88829	10.5	1.24436	1.87217
10.52	2.84172	3.60211	10.52	1.31279	1.5282
10.54	2.85965	3.52204	10.54	1.24045	1.74135
10.56	2.85174	4.08911	10.56	1.24833	2.02794
10.58	2.86265	3.83347	10.58	1.32761	2.11989
10.6	2.97084	3.68071	10.6	1.38494	1.83901
10.62	2.76496	2.89423	10.62	1.33014	2.31156
10.64	2.88667	4.08009	10.64	1.2733	1.74602
10.66	3.01271	3.84356	10.66	1.32227	1.86147
10.68	2.88826	3.86062	10.68	1.19523	1.49462
10.7	2.98184	3.98579	10.7	1.26228	2.1172
10.72	2.89093	4.00538	10.72	1.28257	2.4469
10.74	2.70903	3.71874	10.74	1.27092	1.75011
10.76	2.6492	3.90609	10.76	1.29377	2.50942
10.78	2.72438	2.53098	10.78	1.19778	1.93695
10.8	2.78013	2.6158	10.8	1.20335	2.57065
10.82	2.57422	2.85628	10.82	1.31758	3.15257
10.84	2.56077	2.74602	10.84	1.19822	3.30389
10.86	2.4243	3.1606	10.86	1.29205	2.81645
10.88	2.56392	3.21183	10.88	1.23488	3.12734
10.9	2.60528	2.8493	10.9	1.28147	3.15812
10.92	2.55987	3.12031	10.92	1.34271	3.10148
10.94	2.41443	3.18308	10.94	1.31394	3.17118
10.96	2.49367	2.97749	10.96	1.34247	2.92911
10.98	2.78573	2.82932	10.98	1.22936	2.62084
11	2.82453	2.46609	11	1.19302	2.84841
11.02	2.82142	2.93019	11.02	1.24037	3.05067
11.04	2.80971	3.07252	11.04	1.20708	2.58717
11.06	2.6561	3.00548	11.06	1.26372	3.11522
11.08	2.92444	3.47353	11.08	1.33793	3.11195
11.1	2.61122	3.27754	11.1	1.25228	2.95013
11.12	2.56407	3.432	11.12	1.33361	3.13031
11.14	2.43993	3.38313	11.14	1.37998	3.15022
11.16	2.34709	2.97119	11.16	1.28102	3.17958
11.18	2.37669	3.01659	11.18	1.32418	2.96599
11.2	2.41646	3.0507	11.2	1.2846	3.16124
11.22	2.3176	3.06357	11.22	1.40939	2.97828
11.24	2.20379	2.85427	11.24	1.25866	3.06306
11.26	2.34944	2.34721	11.26	1.31991	2.51547
11.28	2.51208	2.52166	11.28	1.30599	1.77956
11.3	2.27885	2.53211	11.3	1.4112	1.67172
11.32	2.09569	2.27604	11.32	1.41638	1.52465
11.34	2.39823	2.17327	11.34	1.38592	1.45241
11.36	2.47889	0.935129	11.36	1.51139	2.01985
11.38	2.4947	0.946556	11.38	1.44325	2.1598
11.4	2.49718	0.825517	11.4	1.44839	2.23858
11.42	2.59889	1.69195	11.42	1.45355	2.81084
11.44	2.58684	2.46594	11.44	1.3621	3.16347
11.46	2.30495	1.42388	11.46	1.34602	3.52125
11.48	2.35427	1.45511	11.48	1.46725	3.26903
11.5	2.21303	2.06387	11.5	1.37093	3.07535
11.52	2.27946	1.42244	11.52	1.34707	3.34693
11.54	2.15305	1.83111	11.54	1.50974	3.39899
11.56	2.19878	2.22841	11.56	1.37829	3.08409
11.58	2.3819	1.69534	11.58	1.37118	2.84367
11.6	2.2194	1.58952	11.6	1.387	3.34964
11.62	2.22978	1.18681	11.62	1.36564	3.12033
11.64	2.26226	1.70486	11.64	1.37895	3.26985
11.66	2.14654	1.34679	11.66	1.37093	3.4488
11.68	2.2468	2.15895	11.68	1.43554	2.77105
11.7	2.28803	2.92984	11.7	1.42106	2.53307
11.72	2.33469	3.02323	11.72	1.4136	3.00735
11.74	2.26496	2.72438	11.74	1.43797	3.06618
11.76	2.25373	2.934	11.76	1.42085	2.62024
11.78	2.1807	2.19886	11.78	1.42947	2.94242
11.8	2.22961	1.82112	11.8	1.32569	2.94047
11.82	2.24207	1.86585	11.82	1.33075	3.28949
11.84	2.24936	1.84507	11.84	1.33526	3.10173
11.86	2.17351	2.58641	11.86	1.29488	3.292
11.88	2.22191	2.1022	11.88	1.39853	2.6574
11.9	2.39367	2.21742	11.9	1.43842	3.34257
11.92	2.21529	1.69144	11.92	1.31922	2.51084
11.94	2.25713	1.32376	11.94	1.26278	2.79447
11.96	2.50636	1.62311	11.96	1.35269	2.62767
11.98	2.60057	1.79392	11.98	1.3006	2.91636
12	2.7403	1.44011	12	1.40287	2.64568
12.02	2.78481	1.52478	12.02	1.44565	2.67522
12.04	2.86524	1.28403	12.04	1.36797	2.70745
12.06	2.84912	1.01779	12.06	1.2576	2.79028
12.08	2.84623	1.09087	12.08	1.30657	3.09872
12.1	3.0722	1.0315	12.1	1.39737	3.20784
12.12	3.15363	1.91076	12.12	1.46069	2.78071
12.14	3.20247	2.09776	12.14	1.43494	2.30769
12.16	2.95796	2.80302	12.16	1.32092	2.60953
12.18	2.94383	2.36243	12.18	1.39719	2.90369
12.2	2.82597	2.27562	12.2	1.36517	2.22916
12.22	2.81409	2.55294	12.22	1.37011	2.53421
12.24	2.95744	2.27414	12.24	1.40465	2.41837
12.26	2.70002	2.25203	12.26	1.3334	2.89665
12.28	2.94208	1.76809	12.28	1.40253	3.00458
12.3	2.97822	2.57514	12.3	1.32442	2.88455
12.32	2.83702	2.79175	12.32	1.36552	2.50415
12.34	2.91935	2.29225	12.34	1.43922	2.68254
12.36	2.88367	2.84226	12.36	1.39212	2.97438
12.38	2.91203	2.98137	12.38	1.40846	3.03417
12.4	2.99492	2.74876	12.4	1.4301	2.96537
12.42	3.12347	3.24966	12.42	1.34366	2.61118
12.44	3.25295	3.00382	12.44	1.39873	2.44192
12.46	3.07083	2.95985	12.46	1.29401	2.8676
12.48	3.0034	2.96438	12.48	1.26519	2.96719
12.5	3.09368	2.7751	12.5	1.37885	3.16309
12.52	3.00599	2.76826	12.52	1.4002	2.91681
12.54	2.78437	2.80763	12.54	1.38876	3.08895
12.56	2.91842	2.89706	12.56	1.47751	2.90761
12.58	2.80797	2.73681	12.58	1.38431	2.95097
12.6	2.98872	2.62248	12.6	1.41763	3.01087
12.62	3.14772	2.78144	12.62	1.43927	3.11231
12.64	3.36625	2.42439	12.64	1.36417	2.96545
12.66	3.44234	2.04451	12.66	1.35467	2.79174
12.68	3.35159	2.00616	12.68	1.52815	2.5059
12.7	3.34814	2.69642	12.7	1.54389	2.96208
12.72	3.31661	2.71933	12.72	1.4275	2.83934
12.74	3.24639	2.30813	12.74	1.37317	2.79928
12.76	3.43793	2.02327	12.76	1.41364	2.81946
12.78	3.41111	1.64239	12.78	1.42853	2.74461
12.8	3.64136	2.0038	12.8	1.49569	2.70038
12.82	3.59556	2.84195	12.82	1.53094	3.26979
12.84	3.5308	2.59977	12.84	1.49623	2.72107
12.86	3.6527	2.24161	12.86	1.47696	2.3819
12.88	3.53786	1.99638	12.88	1.50472	2.82008
12.9	3.50661	1.26271	12.9	1.44236	3.34533
12.92	3.55418	2.26574	12.92	1.39774	3.17518
12.94	3.36915	1.84747	12.94	1.49976	3.03571
12.96	3.13314	2.23969	12.96	1.49446	3.32532
12.98	2.94477	1.99234	12.98	1.54677	3.23689
13	2.76918	2.29636	13	1.53831	2.8251
13.02	3.08725	1.53768	13.02	1.47486	3.27799
13.04	3.20195	1.40058	13.04	1.4542	3.2068
13.06	3.18276	0.907092	13.06	1.4436	3.5799
13.08	3.10786	2.35517	13.08	1.52897	3.20674
13.1	3.07418	2.70857	13.1	1.40899	3.24419
13.12	3.12007	3.01303	13.12	1.35062	3.3547
13.14	3.25806	2.81488	13.14	1.47955	3.20467
13.16	3.40501	2.19	13.16	1.44757	3.18837
13.18	3.32827	2.68067	13.18	1.4541	3.10457
13.2	3.60741	2.2481	13.2	1.44741	3.08342
13.22	3.70266	2.23309	13.22	1.46947	2.77359
13.24	3.80002	2.10156	13.24	1.36971	3.07136
13.26	3.2713	2.65452	13.26	1.37199	2.89264
13.28	3.59997	3.23336	13.28	1.397	2.8559
13.3	3.40391	3.1435	13.3	1.44828	2.64821
13.32	3.25073	3.35982	13.32	1.38776	2.39124
13.34	3.22191	3.14227	13.34	1.56641	2.88063
13.36	3.29722	2.98078	13.36	1.43265	2.80543
13.38	3.27545	2.86748	13.38	1.42489	2.81148
13.4	3.38865	2.95648	13.4	1.52676	2.74466
13.42	3.35684	3.05959	13.42	1.46512	2.97434
13.44	3.30319	3.00062	13.44	1.42643	3.08273
13.46	3.27533	2.81146	13.46	1.48509	2.94644
13.48	3.31039	2.78921	13.48	1.49676	3.10812
13.5	3.2368	2.86962	13.5	1.62057	3.27897
13.52	3.12227	2.72426	13.52	1.6045	2.87203
13.54	3.26827	2.83294	13.54	1.51055	3.06562
13.56	3.15519	2.74331	13.56	1.5472	2.81962
13.58	3.20152	3.13642	13.58	1.52042	3.03559
13.6	3.18812	3.32932	13.6	1.51807	2.86289
13.62	2.94851	2.99166	13.62	1.40914	3.08217
13.64	2.74291	3.00057	13.64	1.38338	2.9466
13.66	2.82918	2.9975	13.66	1.52437	3.02693
13.68	2.82898	2.8632	13.68	1.51642	2.85772
13.7	2.69486	2.81052	13.7	1.55392	2.8872
13.72	2.49176	2.81279	13.72	1.41379	3.16332
13.74	2.54923	2.85901	13.74	1.36777	3.24201
13.76	2.22088	3.01484	13.76	1.41013	3.28392
13.78	2.41613	2.98764	13.78	1.30153	3.0354
13.8	2.27645	3.29076	13.8	1.34947	3.25226
13.82	2.41952	2.09289	13.82	1.37293	2.91965
13.84	2.51606	1.64754	13.84	1.47261	2.95962
13.86	2.62707	2.96335	13.86	1.50716	2.76029
13.88	2.67333	2.36009	13.88	1.41518	3.02187
13.9	2.47836	2.73989	13.9	1.31272	2.68085
13.92	2.54962	2.56127	13.92	1.34843	2.92312
13.94	2.6057	2.93511	13.94	1.52497	2.93948
13.96	2.47999	2.26224	13.96	1.42198	2.92673
13.98	2.553	2.11786	13.98	1.47647	2.8008
14	2.81283	3.19845	14	1.42401	2.61469
14.02	2.68092	3.30967	14.02	1.37278	2.89744
14.04	2.81023	2.82577	14.04	1.4664	2.8647
14.06	2.827	1.24543	14.06	1.38671	2.75086
14.08	3.03249	1.35892	14.08	1.36528	2.85051
14.1	3.27094	2.20637	14.1	1.45383	2.92533
14.12	3.50557	3.09823	14.12	1.35247	2.8736
14.14	3.36168	2.10795	14.14	1.57219	2.74259
14.16	3.29354	2.04209	14.16	1.51314	3.0288
14.18	3.2863	2.68244	14.18	1.47856	2.89849
14.2	3.24889	2.15042	14.2	1.45328	2.88064
14.22	3.37687	2.56917	14.22	1.43225	2.37614
14.24	3.37545	2.3607	14.24	1.37706	2.36601
14.26	3.48532	2.30243	14.26	1.41609	2.65789
14.28	3.36959	2.23402	14.28	1.46283	2.79262
14.3	3.37343	1.93931	14.3	1.47636	2.9988
14.32	3.35891	2.05206	14.32	1.5008	2.84338
14.34	3.35673	1.82567	14.34	1.41572	2.93176
14.36	3.17427	1.7542	14.36	1.29467	2.90672
14.38	3.22114	1.57139	14.38	1.3908	2.97802
14.4	3.21958	2.24414	14.4	1.25328	2.9984
14.42	3.18587	1.49443	14.42	1.37575	3.05522
14.44	2.96612	1.40222	14.44	1.34565	2.7025
14.46	2.93674	1.45862	14.46	1.2958	2.89395
14.48	2.86581	2.14324	14.48	1.30935	2.85399
14.5	2.8443	2.04793	14.5	1.27214	2.97
14.52	2.73231	1.49977	14.52	1.3751	2.9419
14.54	2.78924	2.33758	14.54	1.40988	2.85169
14.56	2.96605	3.27502	14.56	1.4744	2.93475
14.58	2.84588	2.86503	14.58	1.51992	2.66268
14.6	2.96831	2.3642	14.6	1.48707	2.9729
14.62	3.04971	1.65743	14.62	1.52474	3.16647
14.64	3.10866	1.36197	14.64	1.4289	2.74456
14.66	2.79072	1.56973	14.66	1.49484	2.79888
14.68	2.84436	2.65273	14.68	1.5317	3.02985
14.7	2.89536	2.24474	14.7	1.49534	2.75407
14.72	2.97796	2.96855	14.72	1.41526	2.64715
14.74	2.77334	3.10591	14.74	1.37974	2.68098
14.76	2.48791	2.65844	14.76	1.34976	2.65293
14.78	2.40802	2.24773	14.78	1.55276	2.8134
14.8	2.57248	2.1809	14.8	1.4305	2.81478
14.82	2.70147	3.17871	14.82	1.41397	3.05995
14.84	2.68831	2.13643	14.84	1.33816	2.74662
14.86	2.58985	2.78232	14.86	1.33574	3.00291
14.88	2.59997	2.62665	14.88	1.3039	3.08168
14.9	2.68805	2.53843	14.9	1.33217	2.62631
14.92	2.52784	2.4295	14.92	1.44354	2.6209
14.94	2.45688	1.36217	14.94	1.32385	2.6263
14.96	2.71214	2.85009	14.96	1.33246	2.55498
14.98	2.75001	2.51881	14.98	1.40133	2.87052
15	2.61076	2.81655	15	1.36475	2.92577
15.02	2.68486	3.00333	15.02	1.32596	2.85951
15.04	2.86934	2.79854	15.04	1.35601	3.15241
15.06	2.78267	2.73526	15.06	1.417	2.83682
15.08	2.70482	2.47099	15.08	1.33753	3.1334
15.1	2.79575	2.68975	15.1	1.31713	3.00384
15.12	2.78493	1.82111	15.12	1.47094	2.77471
15.14	2.74651	2.28361	15.14	1.49972	2.61862
15.16	2.7486	2.12953	15.16	1.49215	2.74744
15.18	2.98505	3.02671	15.18	1.42781	2.56132
15.2	2.95435	2.87133	15.2	1.47756	2.43358
15.22	2.95508	2.72394	15.22	1.45367	2.80509
15.24	2.77879	2.56625	15.24	1.49765	2.74285
15.26	2.88486	2.53092	15.26	1.44003	2.86393
15.28	2.8846	2.53226	15.28	1.41981	2.84397
15.3	2.82231	2.63359	15.3	1.37229	2.84173
15.32	2.7504	2.72373	15.32	1.48295	2.68725
15.34	2.53098	2.64197	15.34	1.51922	2.88882
15.36	2.70179	1.99631	15.36	1.49664	2.44209
15.38	2.66511	2.57566	15.38	1.53771	2.82853
15.4	2.60843	2.44277	15.4	1.48738	2.75192
15.42	2.64693	2.64053	15.42	1.43851	2.77954
15.44	2.56957	2.5776	15.44	1.35621	3.03322
15.46	2.53662	2.87629	15.46	1.31816	2.77362
15.48	2.26824	2.43524	15.48	1.33283	2.81867
15.5	2.31001	2.60881	15.5	1.30126	3.13224
15.52	2.35449	3.0112	15.52	1.34592	2.75272
15.54	2.32524	2.66189	15.54	1.27872	3.03761
15.56	2.16036	2.64694	15.56	1.24569	2.9495
15.58	2.18663	2.9122	15.58	1.26911	2.94876
15.6	2.23323	2.91753	15.6	1.24302	2.8318
15.62	2.27341	3.17734	15.62	1.29248	2.80211
15.64	2.23636	3.08389	15.64	1.2112	2.88447
15.66	2.1541	3.27581	15.66	1.27125	3.07769
15.68	2.2299	2.62371	15.68	1.22629	2.92071
15.7	2.25559	3.01631	15.7	1.33073	3.10991
15.72	2.19433	2.83002	15.72	1.2868	2.36937
15.74	2.05547	2.88867	15.74	1.38533	2.63842
15.76	2.13036	2.71651	15.76	1.3439	2.99116
15.78	2.05245	2.8195	15.78	1.30215	2.45748
15.8	2.13892	3.29733	15.8	1.4977	2.93593
15.82	2.18423	2.44704	15.82	1.38873	2.89062
15.84	2.24995	2.79656	15.84	1.30295	2.97191
15.86	2.02248	2.10301	15.86	1.28954	2.93535
15.88	2.13547	2.47098	15.88	1.26708	3.25255
15.9	2.19831	3.03145	15.9	1.2935	3.2443
15.92	2.17523	2.62475	15.92	1.26382	3.44406
15.94	2.26024	2.59866	15.94	1.30998	2.85442
15.96	2.30078	3.17175	15.96	1.24939	2.916
15.98	2.1227	2.66848	15.98	1.29375	2.90232
16	2.06066	3.05596	16	1.31955	3.01659
16.02	2.14823	3.33862	16.02	1.26277	2.77632
16.04	2.17164	3.09476	16.04	1.2452	3.02555
16.06	2.21441	2.8365	16.06	1.23769	2.74368
16.08	2.24915	2.5356	16.08	1.33822	2.74348
16.1	2.31117	2.98961	16.1	1.24245	3.36967
16.12	2.3287	2.89029	16.12	1.30223	3.24338
16.14	2.36748	2.93654	16.14	1.26702	3.41505
16.16	2.38899	2.93359	16.16	1.35493	3.13761
16.18	2.24421	3.02539	16.18	1.34277	3.27768
16.2	2.27521	2.78199	16.2	1.38964	3.06602
16.22	2.43457	2.92075	16.22	1.40173	3.15093
16.24	2.42659	2.76882	16.24	1.36804	3.03511
16.26	2.46854	2.89516	16.26	1.31739	2.94466
16.28	2.37901	2.92584	16.28	1.28634	3.2568
16.3	2.27333	2.84286	16.3	1.28381	2.84831
16.32	2.14358	2.88281	16.32	1.35529	2.88602
16.34	2.0937	3.08089	16.34	1.25153	2.92551
16.36	2.02643	2.9335	16.36	1.26332	3.0909
16.38	1.96761	2.66207	16.38	1.37267	3.05285
16.4	2.01733	2.96429	16.4	1.30806	3.02973
16.42	2.08462	3.11215	16.42	1.31594	2.87445
16.44	2.1373	2.78102	16.44	1.37344	3.16755
16.46	2.17586	2.777	16.46	1.2462	3.33633
16.48	2.26466	2.47697	16.48	1.31909	2.83774
16.5	2.42394	2.28393	16.5	1.32096	2.98529
16.52	2.32154	2.53066	16.52	1.24847	2.72498
16.54	2.27264	2.76339	16.54	1.21903	3.09638
16.56	2.31047	2.54036	16.56	1.29832	3.00647
16.58	2.27335	2.64463	16.58	1.37724	3.1066
16.6	2.23219	2.46477	16.6	1.30214	3.17978
16.62	2.3116	2.97013	16.62	1.33826	2.87795
16.64	2.25885	2.65219	16.64	1.30481	2.90082
16.66	2.1831	2.85643	16.66	1.28834	3.21459
16.68	2.09952	2.82551	16.68	1.29017	3.05996
16.7	2.1065	2.91028	16.7	1.36168	3.00995
16.72	2.0439	2.98085	16.72	1.32371	2.98557
16.74	1.98805	2.92336	16.74	1.28092	2.68963
16.76	2.16189	2.63522	16.76	1.38933	2.97079
16.78	2.05601	2.99586	16.78	1.36214	2.96167
16.8	2.19001	2.91772	16.8	1.32316	3.02115
16.82	2.21089	2.57267	16.82	1.33951	3.04339
16.84	2.24608	2.43787	16.84	1.24638	2.9192
16.86	2.24576	2.6675	16.86	1.21494	2.97815
16.88	2.26577	3.67526	16.88	1.264	2.97718
16.9	2.2665	3.09727	16.9	1.24031	3.16507
16.92	2.33727	3.30736	16.92	1.20409	3.39853
16.94	2.31873	2.4626	16.94	1.20423	3.47206
16.96	2.25347	1.51918	16.96	1.24068	3.26707
16.98	2.15526	1.35645	16.98	1.26384	3.45193
17	2.29506	1.10834	17	1.27989	3.50458
17.02	2.48618	2.03	17.02	1.23114	3.30494
17.04	2.36139	1.75676	17.04	1.26107	3.38533
17.06	2.45492	2.70093	17.06	1.29734	2.91597
17.08	2.56644	2.12293	17.08	1.26303	3.25265
17.1	2.43864	2.36906	17.1	1.33162	2.96371
17.12	2.51669	1.81993	17.12	1.30726	2.9534
17.14	2.53359	1.8824	17.14	1.30805	2.69885
17.16	2.30274	2.29729	17.16	1.31721	2.89492
17.18	2.3188	1.82605	17.18	1.24852	2.85038
17.2	2.28841	2.0628	17.2	1.29279	3.187
17.22	2.41455	2.05898	17.22	1.24677	3.1522
17.24	2.46021	1.9659	17.24	1.24883	2.95922
17.26	2.44529	2.78816	17.26	1.28137	2.98802
17.28	2.48027	1.9687	17.28	1.26581	3.01305
17.3	2.46432	2.15213	17.3	1.32135	3.12666
17.32	2.39657	1.97781	17.32	1.33262	3.04621
17.34	2.63128	2.29609	17.34	1.24881	3.10288
17.36	2.54612	1.75	17.36	1.35433	3.22164
17.38	2.61811	1.57771	17.38	1.19809	2.91336
17.4	2.46291	1.68428	17.4	1.28034	3.18309
17.42	2.38352	1.6091	17.42	1.26422	3.22803
17.44	2.43153	1.75667	17.44	1.17153	3.32583
17.46	2.35065	2.04338	17.46	1.18072	3.20152
17.48	2.43316	1.38124	17.48	1.18597	3.20254
17.5	2.52189	1.93158	17.5	1.26964	2.92544
17.52	2.48411	1.03033	17.52	1.24072	2.81177
17.54	2.51547	1.20515	17.54	1.33776	3.09734
17.56	2.57343	1.04041	17.56	1.41156	2.84151
17.58	2.52724	1.16216	17.58	1.3394	3.33431
17.6	2.55205	1.11673	17.6	1.47772	3.29751
17.62	2.72724	1.63757	17.62	1.37105	3.37416
17.64	2.55793	1.53231	17.64	1.36204	3.37803
17.66	2.66001	0.536254	17.66	1.4109	3.18102
17.68	2.63656	1.49354	17.68	1.38615	3.17965
17.7	2.61809	1.72876	17.7	1.34315	3.12677
17.72	2.68322	1.25869	17.72	1.36435	3.49157
17.74	2.701	2.15153	17.74	1.34659	3.12385
17.76	2.5226	1.11981	17.76	1.23815	3.48006
17.78	2.58905	1.08654	17.78	1.27433	3.4556
17.8	2.52489	1.83247	17.8	1.28365	3.59037
17.82	2.60364	1.88225	17.82	1.40107	3.53934
17.84	2.50079	1.65804	17.84	1.32295	3.44335
17.86	2.46829	2.24585	17.86	1.2648	3.43282
17.88	2.38023	1.58484	17.88	1.34303	3.53143
17.9	2.31589	2.04491	17.9	1.33208	3.54956
17.92	2.27741	2.29374	17.92	1.36551	3.37483
17.94	2.22699	2.10846	17.94	1.28117	3.67831
17.96	2.22267	1.92603	17.96	1.25837	3.29006
17.98	2.24399	1.32896	17.98	1.21131	3.39866
18	2.25475	1.39209	18	1.27813	3.1079
18.02	2.20519	1.49251	18.02	1.29195	3.35443
18.04	2.2628	2.62498	18.04	1.29386	3.38186
18.06	2.3681	1.66907	18.06	1.21332	3.45505
18.08	2.2621	3.17486	18.08	1.26172	3.40201
18.1	2.1702	2.8662	18.1	1.17012	3.54362
18.12	2.16353	1.70805	18.12	1.20874	3.67447
18.14	2.19421	1.29288	18.14	1.28517	3.66758
18.16	2.24868	1.7946	18.16	1.28983	3.55041
18.18	2.26576	2.05993	18.18	1.30455	3.5206
18.2	2.33316	1.58573	18.2	1.41289	3.53685
18.22	2.28332	1.53306	18.22	1.35587	3.18215
18.24	2.13004	2.14728	18.24	1.40134	3.34474
18.26	2.24498	1.6597	18.26	1.33438	3.49229
18.28	2.14953	1.66565	18.28	1.38805	3.46466
18.3	2.24267	1.37476	18.3	1.43515	3.34809
18.32	2.17141	1.92206	18.32	1.30265	3.28856
18.34	2.2476	2.02105	18.34	1.46705	3.43507
18.36	2.40353	2.20965	18.36	1.38993	3.12965
18.38	2.35452	1.83148	18.38	1.41291	3.20058
18.4	2.23435	1.64952	18.4	1.34856	3.39359
18.42	2.13397	1.95521	18.42	1.43459	3.44847
18.44	2.26128	2.14781	18.44	1.4222	3.53421
18.46	2.22655	2.80912	18.46	1.40912	3.34338
18.48	2.29362	2.99317	18.48	1.42625	3.58758
18.5	2.30814	3.04356	18.5	1.38745	3.31002
18.52	2.21487	2.9813	18.52	1.41932	3.37121
18.54	2.1689	2.83686	18.54	1.35183	3.45292
18.56	2.22038	2.68084	18.56	1.26915	3.44599
18.58	2.1653	2.67482	18.58	1.26292	3.23022
18.6	2.25212	3.24577	18.6	1.29141	2.94047
18.62	2.26992	3.0876	18.62	1.47087	2.82591
18.64	2.37052	3.22458	18.64	1.34303	3.07156
18.66	2.35541	2.60298	18.66	1.33289	3.09468
18.68	2.2887	2.60981	18.68	1.39933	3.01126
18.7	2.41507	2.56962	18.7	1.39681	2.95876
18.72	2.33477	2.44633	18.72	1.39091	2.95064
18.74	2.43075	2.30931	18.74	1.34061	2.85109
18.76	2.4865	3.09462	18.76	1.39163	2.87422
18.78	2.41821	3.04899	18.78	1.39506	2.58834
18.8	2.24971	3.13863	18.8	1.51686	2.93664
18.82	2.36258	2.96291	18.82	1.42859	3.09487
18.84	2.40628	2.65564	18.84	1.43146	3.23637
18.86	2.36578	2.76237	18.86	1.55825	2.92342
18.88	2.39442	2.89705	18.88	1.50336	3.14724
18.9	2.1592	2.34873	18.9	1.49426	3.03202
18.92	2.22527	2.55611	18.92	1.47826	2.94331
18.94	2.23328	2.40987	18.94	1.53045	3.12786
18.96	2.3898	2.5762	18.96	1.43664	3.02405
18.98	2.37438	3.14858	18.98	1.41596	3.06489
19	2.399	2.60322	19	1.42333	3.1923
19.02	2.5657	2.91836	19.02	1.38535	3.05113
19.04	2.47598	2.85249	19.04	1.40663	3.22166
19.06	2.27686	2.91696	19.06	1.40565	3.34813
19.08	2.38476	2.25661	19.08	1.44662	3.37407
19.1	2.42192	2.2847	19.1	1.37874	3.2626
19.12	2.45725	3.17907	19.12	1.40817	3.01176
19.14	2.54994	2.96092	19.14	1.42419	2.90968
19.16	2.62867	2.95277	19.16	1.33266	3.1487
19.18	2.57672	2.57372	19.18	1.38557	3.08603
19.2	2.48608	2.64898	19.2	1.3684	3.16789
19.22	2.49695	2.65042	19.22	1.36744	3.15078
19.24	2.40739	2.51027	19.24	1.30205	3.42745
19.26	2.42356	2.87877	19.26	1.39475	3.38283
19.28	2.35613	2.54799	19.28	1.37754	3.43749
19.3	2.4731	2.54749	19.3	1.34627	3.42095
19.32	2.57956	2.87725	19.32	1.42839	3.43021
19.34	2.55178	2.62987	19.34	1.45351	3.51722
19.36	2.54306	2.59051	19.36	1.45134	3.3702
19.38	2.48998	2.58786	19.38	1.57028	3.4339
19.4	2.41447	2.91538	19.4	1.50541	3.4375
19.42	2.38037	2.67134	19.42	1.37143	3.06866
19.44	2.42525	2.59043	19.44	1.4297	2.69604
19.46	2.5115	2.7046	19.46	1.39341	3.10577
19.48	2.47581	2.4564	19.48	1.41498	2.95494
19.5	2.48494	2.42527	19.5	1.34794	3.17414
19.52	2.45168	2.22781	19.52	1.38241	2.74806
19.54	2.44557	2.37295	19.54	1.42715	2.73041
19.56	2.4394	2.46505	19.56	1.5221	3.01514
19.58	2.48866	2.79206	19.58	1.56131	2.96724
19.6	2.65009	2.65107	19.6	1.543	3.22424
19.62	2.45151	2.87044	19.62	1.46432	3.05775
19.64	2.44719	2.63894	19.64	1.36034	3.0268
19.66	2.45462	2.63997	19.66	1.36818	3.15462
19.68	2.4755	2.46278	19.68	1.53082	2.94637
19.7	2.64172	2.60238	19.7	1.39786	3.13361
19.72	2.89395	2.8321	19.72	1.39163	3.03254
19.74	2.66138	2.85708	19.74	1.39208	3.20252
19.76	2.68329	2.93914	19.76	1.39852	2.95703
19.78	2.72706	2.92479	19.78	1.36521	2.99021
19.8	2.66299	3.1227	19.8	1.40522	3.03493
19.82	2.58194	3.07455	19.82	1.44873	3.07313
19.84	2.73059	2.85937	19.84	1.44225	2.83813
19.86	2.89922	2.56384	19.86	1.36597	2.90997
19.88	2.87238	2.81298	19.88	1.43312	2.77652
19.9	2.79017	2.556	19.9	1.42008	2.92691
19.92	2.77882	2.60964	19.92	1.38287	3.214
19.94	2.707	2.95079	19.94	1.43285	2.88676
19.96	2.80038	2.82151	19.96	1.38095	2.93864
19.98	2.68243	2.81027	19.98	1.40464	3.10539
20	2.82803	2.71825	20	1.38697	3.03147
20.02	2.51654	2.79042	20.02	1.3336	3.03469
20.04	2.66942	3.03268	20.04	1.3221	3.04569
20.06	2.7021	2.80049	20.06	1.40248	3.20881
20.08	2.67108	2.7893	20.08	1.42186	3.23475
20.1	2.67914	2.6766	20.1	1.46379	3.15864
20.12	2.62012	2.79923	20.12	1.41999	3.28151
20.14	2.49325	2.85404	20.14	1.35259	3.08389
20.16	2.51629	2.85041	20.16	1.42316	3.15782
20.18	2.63252	2.55651	20.18	1.48916	2.89783
20.2	2.53436	2.63214	20.2	1.40177	3.02853
20.22	2.54488	2.86303	20.22	1.47415	3.2119
20.24	2.34094	2.26016	20.24	1.46069	3.23476
20.26	2.18243	2.21684	20.26	1.47262	3.07159
20.28	2.12925	2.62808	20.28	1.60801	3.03854
20.3	2.19238	2.27854	20.3	1.62335	3.00178
20.32	2.19586	2.3385	20.32	1.61595	2.89765
20.34	2.17756	2.67072	20.34	1.53304	2.76373
20.36	2.26215	2.23952	20.36	1.56216	2.84809
20.38	2.08116	1.97042	20.38	1.50652	2.96036
20.4	2.13062	2.64059	20.4	1.56209	2.87538
20.42	2.18831	2.53484	20.42	1.58095	3.02634
20.44	2.16466	2.10453	20.44	1.48214	3.14271
20.46	2.23866	2.26431	20.46	1.49864	2.48555
20.48	2.01208	2.11467	20.48	1.45649	2.74125
20.5	2.02829	2.69298	20.5	1.49264	2.53038
20.52	2.14274	3.26974	20.52	1.53999	2.65578
20.54	2.10833	2.74668	20.54	1.54236	2.77181
20.56	2.24732	2.6952	20.56	1.68199	2.65331
20.58	2.24777	3.27202	20.58	1.62203	2.79199
20.6	2.26843	2.94294	20.6	1.6152	2.85959
20.62	2.29656	2.78272	20.62	1.63384	3.00299
20.64	2.28099	2.82127	20.64	1.68126	2.54438
20.66	2.13027	3.08182	20.66	1.60795	2.46071
20.68	2.2871	3.19764	20.68	1.63719	2.36938
20.7	2.38508	3.16677	20.7	1.69744	2.6618
20.72	2.15269	2.86808	20.72	1.55066	2.95211
20.74	2.17661	2.69328	20.74	1.5879	2.87425
20.76	2.22991	2.49893	20.76	1.47703	2.55004
20.78	2.34784	2.44705	20.78	1.42749	2.42937
20.8	2.3274	2.90723	20.8	1.45592	2.42142
20.82	2.34422	2.94823	20.82	1.61282	2.71446
20.84	2.28221	2.77364	20.84	1.68196	2.48117
20.86	2.3614	2.7598	20.86	1.59652	2.58586
20.88	2.46964	3.01551	20.88	1.55481	2.64019
20.9	2.58977	3.05613	20.9	1.59012	2.4746
20.92	2.48678	3.01583	20.92	1.59095	2.56743
20.94	2.42129	3.03727	20.94	1.53339	2.92273
20.96	2.2325	2.92154	20.96	1.53074	2.04839
20.98	2.37001	3.0939	20.98	1.71154	2.41022
21	2.14746	2.96469	21	1.68975	2.86878
21.02	2.28614	2.99942	21.02	1.59086	3.04516
21.04	2.37399	2.84209	21.04	1.66036	2.8884
21.06	2.39676	3.02584	21.06	1.61167	3.14053
21.08	2.3041	2.93094	21.08	1.6492	2.74238
21.1	2.31268	2.815	21.1	1.50905	3.21028
21.12	2.29071	2.95242	21.12	1.64511	3.33337
21.14	2.2966	2.61871	21.14	1.58614	3.30598
21.16	2.2725	2.77558	21.16	1.48687	3.24485
21.18	2.38626	3.01371	21.18	1.58774	3.52743
21.2	2.45732	3.24278	21.2	1.47212	3.70183
21.22	2.59237	3.22723	21.22	1.48425	3.74102
21.24	2.5361	3.09851	21.24	1.5489	3.33346
21.26	2.6273	2.97383	21.26	1.58945	3.70975
21.28	2.4695	2.8517	21.28	1.56057	3.29397
21.3	2.39059	2.7263	21.3	1.52056	3.43563
21.32	2.48933	2.72768	21.32	1.39396	3.31
21.34	2.42546	2.67714	21.34	1.45215	3.45763
21.36	2.36771	2.7822	21.36	1.46812	3.61489
21.38	2.67312	2.73694	21.38	1.53412	3.57709
21.4	2.6503	2.69442	21.4	1.58947	3.22656
21.42	2.56995	2.78148	21.42	1.62499	3.18348
21.44	2.4487	2.73986	21.44	1.53361	3.14686
21.46	2.34956	2.83448	21.46	1.47648	3.2958
21.48	2.31801	2.80878	21.48	1.57947	3.55663
21.5	2.18554	2.89787	21.5	1.48711	3.61851
21.52	2.2644	2.79978	21.52	1.52292	3.55392
21.54	2.26553	2.9455	21.54	1.44139	3.37098
21.56	2.28599	2.86293	21.56	1.51061	3.62152
21.58	2.2576	2.6447	21.58	1.5001	3.29694
21.6	2.24997	2.87862	21.6	1.45584	3.09628
21.62	2.14234	2.81391	21.62	1.5381	2.72017
21.64	2.13153	2.78888	21.64	1.46915	2.80818
21.66	2.08918	2.97613	21.66	1.56216	3.07475
21.68	2.17921	2.83574	21.68	1.46124	2.88383
21.7	2.20769	2.53504	21.7	1.54159	3.02484
21.72	2.18147	2.78376	21.72	1.43367	3.13442
21.74	2.11704	2.45012	21.74	1.5302	3.24648
21.76	2.10046	2.74285	21.76	1.51481	3.07771
21.78	1.99363	2.71272	21.78	1.52901	2.98815
21.8	2.06988	2.41715	21.8	1.50905	2.87933
21.82	2.0279	2.51267	21.82	1.51734	3.04467
21.84	2.13184	2.44974	21.84	1.46074	2.98813
21.86	2.2944	2.24185	21.86	1.43721	2.958
21.88	2.05314	2.46905	21.88	1.42601	3.14597
21.9	2.22706	2.58435	21.9	1.46307	3.17512
21.92	2.20532	2.58566	21.92	1.47333	3.28913
21.94	2.08512	2.4722	21.94	1.54354	3.45354
21.96	2.08621	2.42375	21.96	1.51859	3.53428
21.98	2.26489	2.40052	21.98	1.5835	3.41177
22	2.14746	2.67356	22	1.56763	3.51622
22.02	2.18596	2.93438	22.02	1.56479	3.51816
22.04	2.33253	2.38042	22.04	1.5181	3.54133
22.06	2.13901	2.49987	22.06	1.46618	3.7129
22.08	2.34171	2.53976	22.08	1.44032	3.63249
22.1	2.28522	2.64263	22.1	1.34598	3.3924
22.12	2.28243	2.46783	22.12	1.48847	3.49124
22.14	2.2559	2.56311	22.14	1.39807	3.47393
22.16	2.2753	2.47616	22.16	1.43192	3.45837
22.18	2.27157	2.68615	22.18	1.36324	3.63644
22.2	2.40955	2.79612	22.2	1.43984	3.27142
22.22	2.44085	2.52709	22.22	1.41446	3.70727
22.24	2.49761	2.62645	22.24	1.49416	3.46322
22.26	2.3814	2.65131	22.26	1.59756	3.42031
22.28	2.34357	2.65063	22.28	1.60799	3.25729
22.3	2.23051	2.7004	22.3	1.61892	3.48442
22.32	2.31339	2.32111	22.32	1.59489	3.38462
22.34	2.19141	2.41415	22.34	1.55887	3.24134
22.36	2.39747	2.35669	22.36	1.60193	3.53994
22.38	2.34726	2.55562	22.38	1.54393	3.37138
22.4	2.43863	2.8439	22.4	1.57635	3.42635
22.42	2.36931	2.63606	22.42	1.57277	3.43378
22.44	2.48125	2.60767	22.44	1.59366	3.42083
22.46	2.48702	2.54132	22.46	1.58526	3.35663
22.48	2.28925	2.81566	22.48	1.53841	3.45152
22.5	2.40437	2.59546	22.5	1.46147	3.37216
22.52	2.40464	2.51343	22.52	1.43856	3.34987
22.54	2.319	2.52343	22.54	1.46155	3.40774
22.56	2.2632	2.46125	22.56	1.45806	3.34742
22.58	2.28554	2.72019	22.58	1.47049	3.36222
22.6	2.19757	2.73929	22.6	1.52828	3.36592
22.62	2.2636	2.51627	22.62	1.53507	3.59878
22.64	2.40624	2.48981	22.64	1.49883	3.4506
22.66	2.33683	2.48691	22.66	1.5281	3.55324
22.68	2.40892	2.34303	22.68	1.56735	3.57452
22.7	2.30128	2.79535	22.7	1.55063	3.0867
22.72	2.3278	2.62939	22.72	1.56468	3.32788
22.74	2.24288	2.57546	22.74	1.53038	3.25899
22.76	2.17474	2.73513	22.76	1.49953	3.15577
22.78	2.08148	2.65163	22.78	1.4013	3.00783
22.8	2.08563	2.46896	22.8	1.45438	3.3036
22.82	2.2298	2.56351	22.82	1.4659	2.80342
22.84	2.15038	2.81101	22.84	1.42532	2.75722
22.86	2.10899	2.74442	22.86	1.47919	3.05027
22.88	2.18622	2.55217	22.88	1.52543	2.8945
22.9	2.05082	2.77089	22.9	1.44673	2.93223
22.92	2.0316	3.01073	22.92	1.40663	2.80102
22.94	2.14288	3.18237	22.94	1.46643	2.91194
22.96	2.14905	2.78068	22.96	1.50658	3.23253
22.98	2.17966	2.75715	22.98	1.5208	3.03457
23	2.21592	2.54009	23	1.4784	2.95159
23.02	2.21003	2.91032	23.02	1.55999	2.9229
23.04	2.28282	2.59848	23.04	1.5172	3.00142
23.06	2.2589	2.52723	23.06	1.53856	3.15222
23.08	2.11728	2.73534	23.08	1.58896	2.96883
23.1	2.08229	2.60018	23.1	1.47892	3.14793
23.12	2.09381	2.51444	23.12	1.47761	3.14747
23.14	2.07212	2.61941	23.14	1.51301	3.44144
23.16	2.14824	2.59566	23.16	1.54464	3.49647
23.18	2.15049	2.68643	23.18	1.55634	3.6313
23.2	2.11496	2.63993	23.2	1.60138	3.42945
23.22	2.21846	2.70172	23.22	1.55573	3.40487
23.24	2.30538	2.56162	23.24	1.43701	3.29643
23.26	2.26244	2.70621	23.26	1.47435	3.33805
23.28	2.23931	2.58529	23.28	1.59021	3.55461
23.3	2.21546	2.48552	23.3	1.55064	3.53657
23.32	2.23775	2.66803	23.32	1.56142	3.26802
23.34	2.24188	2.87701	23.34	1.53956	3.67234
23.36	2.18401	2.59498	23.36	1.60354	3.20729
23.38	2.26223	2.76572	23.38	1.65536	3.29611
23.4	2.20881	2.63917	23.4	1.61452	3.49941
23.42	2.19497	2.83298	23.42	1.53089	3.35881
23.44	2.30712	2.90734	23.44	1.55594	3.25529
23.46	2.31831	3.04855	23.46	1.58053	3.40371
23.48	2.36468	2.9064	23.48	1.51015	3.18065
23.5	2.34597	2.86512	23.5	1.60879	3.29696
23.52	2.49187	2.93714	23.52	1.50342	3.38293
23.54	2.58839	3.01118	23.54	1.48808	3.3767
23.56	2.59137	2.99241	23.56	1.45199	3.30233
23.58	2.49619	2.86301	23.58	1.48864	3.41477
23.6	2.67503	3.05775	23.6	1.51339	3.23208
23.62	2.55302	3.08611	23.62	1.54548	3.50992
23.64	2.45194	3.001	23.64	1.50307	3.56121
23.66	2.44477	2.63322	23.66	1.54353	3.62612
23.68	2.41132	2.83649	23.68	1.50762	3.29736
23.7	2.37434	2.96072	23.7	1.49236	3.03785
23.72	2.35567	2.73102	23.72	1.40768	3.30954
23.74	2.23474	3.03166	23.74	1.46445	3.04609
23.76	2.34945	2.96924	23.76	1.48445	3.3029
23.78	2.37058	2.83012	23.78	1.51053	3.19579
23.8	2.33034	2.97034	23.8	1.61514	3.1865
23.82	2.46843	2.86818	23.82	1.47224	3.20371
23.84	2.39051	2.89597	23.84	1.51665	3.09593
23.86	2.55577	2.88755	23.86	1.43022	3.35498
23.88	2.42269	2.82068	23.88	1.46859	3.37216
23.9	2.53132	2.79726	23.9	1.52525	3.5104
23.92	2.54121	3.07297	23.92	1.50958	3.51558
23.94	2.66505	2.50488	23.94	1.59265	3.45967
23.96	2.5376	1.9835	23.96	1.59582	3.29029
23.98	2.59577	1.96533	23.98	1.53855	3.34566
24	2.53029	2.27072	24	1.49278	3.45432
24.02	2.58649	2.95056	24.02	1.66681	3.48505
24.04	2.64119	2.34077	24.04	1.66467	3.5572
24.06	2.63095	2.62906	24.06	1.80084	3.25114
24.08	2.62717	2.72873	24.08	1.68837	3.29517
24.1	2.53964	3.04128	24.1	1.64979	3.25576
24.12	2.87462	2.92899	24.12	1.63622	3.52504
24.14	2.8282	2.91093	24.14	1.58832	3.3421
24.16	2.90662	2.96212	24.16	1.68659	3.56726
24.18	2.721	3.35432	24.18	1.62058	3.50817
24.2	2.82149	3.04259	24.2	1.79649	3.3635
24.22	2.75268	3.2792	24.22	1.74498	3.14066
24.24	2.89987	3.39986	24.24	1.70667	3.37542
24.26	2.84546	3.55956	24.26	1.66391	3.32501
24.28	3.00445	3.25055	24.28	1.64183	3.4484
24.3	2.99142	3.17115	24.3	1.78109	3.30093
24.32	2.64553	3.01961	24.32	1.67514	3.29862
24.34	2.5828	2.84332	24.34	1.60621	3.43919
24.36	2.6079	2.99423	24.36	1.56224	3.4942
24.38	2.70105	2.79227	24.38	1.5643	3.31697
24.4	2.63697	2.91851	24.4	1.57014	3.42769
24.42	2.66809	2.80113	24.42	1.59171	3.4105
24.44	2.66769	2.79263	24.44	1.54972	3.13293
24.46	2.74315	2.83858	24.46	1.59849	3.22564
24.48	2.74531	2.88188	24.48	1.50876	3.15076
24.5	2.65569	3.12904	24.5	1.51094	3.21946
24.52	2.75267	2.91642	24.52	1.50901	3.2054
24.54	2.77902	2.81581	24.54	1.44966	2.98087
24.56	2.93063	2.36029	24.56	1.41761	2.84007
24.58	2.75705	2.85491	24.58	1.6152	2.50842
24.6	2.59027	2.69726	24.6	1.46797	2.47866
24.62	2.78788	2.96766	24.62	1.51177	2.91555
24.64	2.66768	2.95622	24.64	1.38842	3.11043
24.66	2.85821	2.6457	24.66	1.3966	2.95147
24.68	2.80237	3.00195	24.68	1.39949	2.58865
24.7	2.7667	3.07848	24.7	1.47498	2.8905
24.72	2.97886	3.07905	24.72	1.4711	2.38064
24.74	2.89533	2.62049	24.74	1.39584	2.58595
24.76	2.72152	3.03877	24.76	1.44408	2.91795
24.78	2.76112	2.87165	24.78	1.45359	3.00164
24.8	2.7145	2.59384	24.8	1.39483	2.82776
24.82	2.74437	2.92288	24.82	1.38994	2.71286
24.84	2.67725	2.61825	24.84	1.40134	3.0095
24.86	2.64112	2.85581	24.86	1.42097	3.02386
24.88	2.51853	2.98284	24.88	1.48271	2.7645
24.9	2.49576	2.95392	24.9	1.53806	2.68052
24.92	2.54324	2.92974	24.92	1.48031	2.53265
24.94	2.6367	2.63453	24.94	1.49504	2.94488
24.96	2.59007	2.72549	24.96	1.44463	2.67638
24.98	2.67285	2.61986	24.98	1.47968	2.76038
25	2.46778	3.04821	25	1.45061	2.77752
25.02	2.61306	2.59701	25.02	1.46698	2.81572
25.04	2.6574	2.43592	25.04	1.54283	2.74267
25.06	2.51574	2.49541	25.06	1.51943	2.62319
25.08	2.52599	2.56941	25.08	1.618	2.84081
25.1	2.64957	2.85189	25.1	1.49112	2.72562
25.12	2.51732	2.7123	25.12	1.55544	2.50082
25.14	2.53652	2.29478	25.14	1.51269	2.94353
25.16	2.41629	2.44311	25.16	1.53902	3.08214
25.18	2.49934	2.89286	25.18	1.50622	3.00505
25.2	2.66946	2.95133	25.2	1.43362	2.79935
25.22	2.56041	2.84465	25.22	1.56231	2.95951
25.24	2.56454	2.63396	25.24	1.61607	2.98295
25.26	2.61963	2.68768	25.26	1.48729	2.53221
25.28	2.72305	2.62557	25.28	1.50091	2.72175
25.3	2.73525	2.88564	25.3	1.52927	2.68062
25.32	3.02333	2.78754	25.32	1.5707	2.93307
25.34	3.01178	2.73328	25.34	1.46964	2.97466
25.36	3.06269	2.58268	25.36	1.45528	2.80613
25.38	3.18059	2.54364	25.38	1.42696	2.77727
25.4	3.16129	2.50233	25.4	1.48598	3.05546
25.42	3.23659	2.5462	25.42	1.41192	2.77414
25.44	3.33194	2.54854	25.44	1.50846	2.91748
25.46	3.55758	2.58722	25.46	1.35319	3.01761
25.48	3.61951	2.47934	25.48	1.55548	2.98841
25.5	3.65716	2.80475	25.5	1.49848	3.00905
25.52	3.42642	2.62511	25.52	1.51682	2.81936
25.54	3.37263	2.57576	25.54	1.48724	3.08671
25.56	3.35723	3.12095	25.56	1.52159	2.78416
25.58	3.45796	2.78929	25.58	1.46214	2.74403
25.6	3.53799	2.78239	25.6	1.53226	2.35162
25.62	3.59285	2.49487	25.62	1.48689	2.99099
25.64	3.5078	2.56856	25.64	1.44175	2.92714
25.66	3.242	2.24472	25.66	1.47165	2.81942
25.68	3.49725	2.47953	25.68	1.51708	2.93087
25.7	3.46931	2.43559	25.7	1.46155	2.99016
25.72	3.74437	2.37299	25.72	1.55322	2.87373
25.74	3.62129	2.75897	25.74	1.46767	2.65777
25.76	3.40579	3.03539	25.76	1.48299	2.90492
25.78	3.5095	2.61662	25.78	1.39388	2.64851
25.8	3.69318	2.42508	25.8	1.45861	2.43003
25.82	3.22091	2.38059	25.82	1.45029	2.64153
25.84	3.01318	2.36062	25.84	1.42322	2.6728
25.86	2.85661	2.41162	25.86	1.3749	2.73351
25.88	2.91341	2.57353	25.88	1.38561	2.93597
25.9	2.85167	2.44444	25.9	1.38675	2.99076
25.92	2.87651	2.47765	25.92	1.39285	2.88492
25.94	2.74183	2.67423	25.94	1.62842	2.8595
25.96	2.88246	2.59102	25.96	1.43036	2.91835
25.98	2.70679	2.69038	25.98	1.43568	2.78359
26	2.63314	2.46575	26	1.43292	2.73748
26.02	2.6601	2.44917	26.02	1.43657	2.8458
26.04	2.64677	2.31483	26.04	1.47733	2.81362
26.06	2.4271	2.42321	26.06	1.52507	2.72902
26.08	2.39865	2.66	26.08	1.55445	2.87235
26.1	2.50338	2.52324	26.1	1.54578	2.89974
26.12	2.43195	2.41112	26.12	1.52427	2.83044
26.14	2.26281	2.68603	26.14	1.51841	2.71099
26.16	2.20851	2.74837	26.16	1.4535	2.4653
26.18	2.18391	2.86564	26.18	1.55355	2.38584
26.2	2.13914	2.41172	26.2	1.52343	2.68866
26.22	2.27157	2.54096	26.22	1.58035	2.61961
26.24	2.15372	2.69657	26.24	1.62497	3.07694
26.26	2.27839	2.46156	26.26	1.5125	2.95436
26.28	2.22358	2.38589	26.28	1.55579	2.64227
26.3	2.41774	2.4902	26.3	1.48644	2.98931
26.32	2.30882	2.77108	26.32	1.56951	2.91957
26.34	2.26044	2.60852	26.34	1.37864	3.04531
26.36	2.27267	2.63151	26.36	1.43787	2.79822
26.38	2.21926	2.65303	26.38	1.49259	2.75683
26.4	2.27224	2.54785	26.4	1.4117	2.90241
26.42	2.39495	2.60776	26.42	1.46609	2.87757
26.44	2.30636	2.51488	26.44	1.38274	2.66239
26.46	2.31151	2.64305	26.46	1.51962	2.68121
26.48	2.27849	2.67656	26.48	1.45917	2.74373
26.5	2.43076	2.69543	26.5	1.38063	2.79262
26.52	2.46974	2.70761	26.52	1.39285	2.96753
26.54	2.60883	2.55242	26.54	1.42243	2.92614
26.56	2.51572	2.57115	26.56	1.52975	2.87083
26.58	2.24037	2.70545	26.58	1.45392	2.9693
26.6	2.42058	2.8289	26.6	1.59793	3.13773
26.62	2.50323	2.58896	26.62	1.63743	3.04949
26.64	2.44854	2.69701	26.64	1.49714	3.13933
26.66	2.61353	2.81257	26.66	1.40494	2.97712
26.68	2.72105	2.74455	26.68	1.50084	2.88362
26.7	2.72586	2.69423	26.7	1.50859	2.85909
26.72	2.64721	2.72301	26.72	1.47094	3.05768
26.74	2.61154	2.72688	26.74	1.47182	3.39097
26.76	2.82404	2.52677	26.76	1.48357	3.35337
26.78	2.57635	2.53976	26.78	1.49996	3.20322
26.8	2.67367	2.66612	26.8	1.4502	3.1431
26.82	2.85058	2.90652	26.82	1.39492	3.16793
26.84	3.00956	2.94061	26.84	1.46034	3.43559
26.86	3.07171	2.76984	26.86	1.54464	2.91688
26.88	3.07378	2.73528	26.88	1.3598	3.18023
26.9	3.04916	3.18725	26.9	1.48385	3.36525
26.92	3.01477	2.79187	26.92	1.3751	3.16543
26.94	2.86931	2.66855	26.94	1.36994	3.33415
26.96	2.76178	2.72501	26.96	1.40002	2.66569
26.98	2.67475	2.76004	26.98	1.57412	3.07845
27	2.60109	2.78167	27	1.51272	3.02854
27.02	2.5278	2.70295	27.02	1.48555	3.17049
27.04	2.59299	2.76818	27.04	1.38517	2.89959
27.06	2.506	2.78152	27.06	1.44507	3.03691
27.08	2.59105	2.70293	27.08	1.441	3.17271
27.1	2.45514	2.65735	27.1	1.46189	3.27587
27.12	2.3737	2.77158	27.12	1.40668	3.28671
27.14	2.39255	2.57332	27.14	1.51204	3.39861
27.16	2.22447	2.65952	27.16	1.5221	3.46009
27.18	2.19871	2.69975	27.18	1.5492	3.44296
27.2	2.21415	2.82333	27.2	1.55234	3.51606
27.22	2.22121	2.77226	27.22	1.61265	3.3462
27.24	2.11812	2.67275	27.24	1.49356	3.27239
27.26	2.1829	2.71127	27.26	1.4613	3.09895
27.28	2.172	3.02575	27.28	1.50784	3.23074
27.3	2.1899	2.59111	27.3	1.58864	3.53528
27.32	2.35572	2.57237	27.32	1.40632	3.50915
27.34	2.27161	2.69922	27.34	1.47694	3.27904
27.36	2.32296	2.50359	27.36	1.45959	2.61826
27.38	2.29025	2.67496	27.38	1.48489	2.51671
27.4	2.30996	2.81957	27.4	1.47781	2.35489
27.42	2.3007	2.44829	27.42	1.63247	2.74586
27.44	2.23371	2.54338	27.44	1.50374	2.40902
27.46	2.16548	2.40777	27.46	1.55647	2.27483
27.48	2.22723	2.55796	27.48	1.53738	2.81757
27.5	2.18868	2.48012	27.5	1.48421	2.63716
27.52	2.36138	2.6469	27.52	1.64728	2.86873
27.54	2.34287	2.61826	27.54	1.57145	2.87255
27.56	2.37825	2.68067	27.56	1.60872	2.64983
27.58	2.33738	2.71337	27.58	1.55409	2.6478
27.6	2.43123	2.2753	27.6	1.52881	2.86255
27.62	2.32624	2.71181	27.62	1.51294	3.33684
27.64	2.30264	2.93712	27.64	1.57915	3.12185
27.66	2.40906	2.93529	27.66	1.49412	3.2089
27.68	2.47802	3.15791	27.68	1.57249	2.90442
27.7	2.56513	3.12931	27.7	1.53307	2.68399
27.72	2.54441	2.9764	27.72	1.52534	3.00193
27.74	2.74591	3.24158	27.74	1.65733	2.86202
27.76	2.64811	3.1185	27.76	1.67345	2.74368
27.78	2.59912	2.99949	27.78	1.47545	2.8522
27.8	2.40165	2.51929	27.8	1.48399	2.79489
27.82	2.43464	2.53032	27.82	1.53573	2.9467
27.84	2.39711	2.50442	27.84	1.48104	2.72761
27.86	2.32682	2.49353	27.86	1.50093	3.02499
27.88	2.42366	2.50632	27.88	1.50407	3.33709
27.9	2.30465	2.44097	27.9	1.43068	3.37402
27.92	2.29745	2.49365	27.92	1.53356	3.32153
27.94	2.31036	2.4036	27.94	1.53398	3.29491
27.96	2.44131	2.44639	27.96	1.60839	3.54893
27.98	2.51602	2.37167	27.98	1.57828	3.5323
28	2.50504	2.5788	28	1.52498	3.6188
28.02	2.73994	2.4248	28.02	1.65205	3.54745
28.04	2.74656	2.42181	28.04	1.59941	3.60082
28.06	2.77394	2.53445	28.06	1.54316	3.5842
28.08	2.75043	2.3716	28.08	1.56285	3.5138
28.1	2.8978	2.55311	28.1	1.58524	3.50896
28.12	2.89803	2.4709	28.12	1.61706	3.49726
28.14	2.9694	2.72704	28.14	1.4614	3.56773
28.16	2.92792	2.52297	28.16	1.44423	3.54284
28.18	2.97035	2.52023	28.18	1.47972	3.4784
28.2	3.05612	2.47903	28.2	1.5596	3.49272
28.22	3.02856	2.53277	28.22	1.52769	3.52071
28.24	3.03951	2.73653	28.24	1.49042	3.51519
28.26	3.05142	2.40424	28.26	1.42789	3.51816
28.28	2.94903	2.67301	28.28	1.40527	3.61022
28.3	3.00928	2.579	28.3	1.56519	3.53915
28.32	3.04776	2.38782	28.32	1.40958	3.46961
28.34	3.1481	2.50238	28.34	1.50063	3.48882
28.36	3.16675	2.61197	28.36	1.506	3.59407
28.38	3.0851	2.69693	28.38	1.46247	3.12353
28.4	3.18268	2.38548	28.4	1.5187	3.60007
28.42	3.13718	2.5597	28.42	1.44327	3.50667
28.44	3.15115	2.4289	28.44	1.45816	3.34845
28.46	3.16259	2.64606	28.46	1.49251	3.27942
28.48	3.32501	2.4754	28.48	1.47935	3.23353
28.5	3.38095	2.63915	28.5	1.47377	3.42077
28.52	3.2604	2.47231	28.52	1.49848	3.35324
28.54	3.25489	2.66232	28.54	1.42739	3.28576
28.56	3.02236	2.43173	28.56	1.57511	3.23272
28.58	3.07296	2.71713	28.58	1.49107	3.16461
28.6	3.07351	2.87084	28.6	1.45712	3.31847
28.62	3.03547	2.82185	28.62	1.40168	3.03245
28.64	3.04284	2.6402	28.64	1.43841	3.13341
28.66	2.96899	2.63054	28.66	1.39261	3.10886
28.68	2.97137	2.73689	28.68	1.39791	3.2449
28.7	3.25574	2.6669	28.7	1.43398	3.01974
28.72	3.22585	2.45899	28.72	1.49005	3.2529
28.74	3.30876	2.57694	28.74	1.45105	3.13836
28.76	3.10772	2.57348	28.76	1.49161	3.27185
28.78	3.26471	2.71107	28.78	1.55119	3.2637
28.8	3.08685	2.67334	28.8	1.48664	3.28553
28.82	3.24232	2.43581	28.82	1.49441	3.41272
28.84	3.18135	2.44196	28.84	1.40964	3.24326
28.86	3.12216	2.56616	28.86	1.44347	3.32634
28.88	3.32822	2.47651	28.88	1.52786	3.23418
28.9	3.62703	2.42194	28.9	1.50593	3.31589
28.92	3.53858	2.52839	28.92	1.45215	3.12337
28.94	3.41127	2.6849	28.94	1.52979	3.30808
28.96	3.25059	2.72093	28.96	1.698	3.29069
28.98	3.09059	2.37751	28.98	1.65066	3.13863
29	3.2852	2.34756	29	1.5277	2.96175
29.02	3.40668	2.61207	29.02	1.52165	3.17774
29.04	3.32974	2.73771	29.04	1.55673	3.53751
29.06	3.62105	2.91888	29.06	1.5212	3.42135
29.08	3.42807	2.98298	29.08	1.42444	3.60002
29.1	3.42528	2.71072	29.1	1.5128	3.40148
29.12	3.36408	2.6311	29.12	1.59034	3.39998
29.14	3.37312	2.28852	29.14	1.60591	3.21544
29.16	3.22544	2.55594	29.16	1.54658	3.2056
29.18	3.2902	2.51535	29.18	1.55399	3.28168
29.2	3.3168	2.66767	29.2	1.48107	3.40158
29.22	3.32421	2.69474	29.22	1.48207	3.10472
29.24	3.40966	2.48306	29.24	1.46031	3.31032
29.26	3.37004	2.57697	29.26	1.47694	3.19076
29.28	3.27716	2.78689	29.28	1.49856	3.4657
29.3	3.46183	2.43565	29.3	1.52965	3.09325
29.32	3.45442	2.59244	29.32	1.53999	3.28799
29.34	3.52865	2.48006	29.34	1.65065	3.39811
29.36	3.57308	2.63537	29.36	1.54736	3.22709
29.38	3.50146	2.68732	29.38	1.57304	3.23926
29.4	3.49037	2.32043	29.4	1.60274	3.10378
29.42	3.55442	2.39829	29.42	1.56144	2.99978
29.44	3.40989	2.37718	29.44	1.53945	2.87425
29.46	3.49622	2.82291	29.46	1.43825	2.96874
29.48	3.46931	2.5248	29.48	1.45797	3.11654
29.5	3.55738	2.43222	29.5	1.45976	3.44527
29.52	3.70421	2.53351	29.52	1.48175	3.1868
29.54	3.66385	2.48427	29.54	1.38613	3.11347
29.56	3.36508	2.36385	29.56	1.49843	3.16198
29.58	3.45357	2.36405	29.58	1.47843	3.20868
29.6	3.50507	2.37953	29.6	1.48973	3.06192
29.62	3.33968	2.58767	29.62	1.47239	3.16473
29.64	3.51153	3.02127	29.64	1.51369	3.33924
29.66	3.48432	2.6973	29.66	1.44672	3.17603
29.68	3.56277	2.63758	29.68	1.58803	3.44209
29.7	3.44701	2.56695	29.7	1.5675	3.20735
29.72	3.40769	2.82936	29.72	1.50178	2.97213
29.74	3.42064	2.69796	29.74	1.57261	2.95449
29.76	3.35272	2.5675	29.76	1.5517	3.1192
29.78	3.39616	2.66582	29.78	1.52756	3.06138
29.8	3.36124	2.67254	29.8	1.50052	3.05571
29.82	3.41233	2.65249	29.82	1.51934	3.11431
29.84	3.5645	2.87082	29.84	1.5039	3.27874
29.86	3.59817	2.66765	29.86	1.55001	3.09894
29.88	3.56779	3.28584	29.88	1.5162	2.87032
29.9	3.79612	2.93192	29.9	1.504	3.15022
29.92	3.65646	3.15367	29.92	1.45934	3.23879
29.94	3.65086	2.77848	29.94	1.57253	2.52498
29.96	3.53238	3.03668	29.96	1.64928	2.28891
29.98	3.4817	3.04016	29.98	1.57184	2.66111
30	3.63061	2.99729	30	1.48381	2.73081
30.02	3.52907	3.12803	30.02	1.65072	2.30954
30.04	3.41744	2.81997	30.04	1.61491	2.48283
30.06	3.28927	2.88227	30.06	1.53337	2.46153
30.08	3.58044	2.72329	30.08	1.58271	2.53797
30.1	3.58518	2.95221	30.1	1.62618	2.60909
30.12	3.6004	2.77306	30.12	1.53227	3.05041
30.14	3.46189	2.1672	30.14	1.69678	2.77557
30.16	3.29306	2.46634	30.16	1.57705	2.86874
30.18	3.31933	2.32941	30.18	1.65582	2.73622
30.2	3.43252	2.63932	30.2	1.74904	2.79907
30.22	3.49206	2.49988	30.22	1.57456	2.58238
30.24	3.46506	2.86349	30.24	1.67851	2.701
30.26	3.45172	2.49911	30.26	1.63156	2.98259
30.28	3.47526	2.83009	30.28	1.57302	2.72583
30.3	3.61367	2.55881	30.3	1.55565	2.92626
30.32	3.47918	2.65097	30.32	1.55236	2.9173
30.34	3.57822	2.70966	30.34	1.46441	3.1039
30.36	3.57823	2.5271	30.36	1.5276	3.0125
30.38	3.52261	2.80165	30.38	1.54511	2.98799
30.4	3.6197	2.48999	30.4	1.59545	2.94284
30.42	3.67065	2.72711	30.42	1.50792	3.01469
30.44	3.73896	3.00985	30.44	1.67618	3.06332
30.46	3.76368	2.83693	30.46	1.60137	2.92074
30.48	3.76277	2.88918	30.48	1.49807	3.24267
30.5	3.72198	2.99386	30.5	1.42871	3.44017
30.52	3.88801	2.85609	30.52	1.48916	3.21755
30.54	3.79078	2.68709	30.54	1.51697	2.92005
30.56	3.74503	2.64186	30.56	1.45222	3.07569
30.58	3.79566	2.58028	30.58	1.54977	2.94362
30.6	3.78	2.71414	30.6	1.46414	2.97412
30.62	3.71882	2.68366	30.62	1.49954	2.81166
30.64	3.66668	2.59849	30.64	1.55503	2.65778
30.66	3.70554	2.60081	30.66	1.5721	3.02966
30.68	3.82529	2.74506	30.68	1.47856	3.05903
30.7	3.61968	2.77095	30.7	1.47872	2.44863
30.72	3.61805	2.73022	30.72	1.46851	2.98822
30.74	3.70878	2.98196	30.74	1.51678	2.4672
30.76	3.78038	2.76777	30.76	1.45441	2.70563
30.78	3.65819	2.87864	30.78	1.45866	3.23476
30.8	3.69324	2.90414	30.8	1.54937	2.77076
30.82	3.55831	2.90706	30.82	1.5574	2.87524
30.84	3.3418	2.66205	30.84	1.56296	2.97532
30.86	3.38297	2.8604	30.86	1.58469	2.59088
30.88	3.40233	2.49469	30.88	1.59404	2.82644
30.9	3.26621	2.68718	30.9	1.52286	2.39134
30.92	3.40429	2.57525	30.92	1.49192	2.52226
30.94	3.47391	2.32359	30.94	1.55317	2.73104
30.96	3.41866	2.61363	30.96	1.62026	2.69998
30.98	3.515	2.71222	30.98	1.43063	2.86077
31	3.38942	2.19932	31	1.43953	2.73878
31.02	3.35741	2.71608	31.02	1.49446	2.60962
31.04	3.23102	2.30163	31.04	1.39784	2.70586
31.06	3.36412	2.43974	31.06	1.38832	2.66774
31.08	3.44713	2.31264	31.08	1.3968	2.51497
31.1	3.44858	2.21937	31.1	1.45282	2.62486
31.12	3.45824	2.33625	31.12	1.42249	2.22319
31.14	3.52791	2.43647	31.14	1.33177	2.83829
31.16	3.45894	2.80326	31.16	1.36156	2.79142
31.18	3.49585	2.90986	31.18	1.41312	2.83226
31.2	3.51962	2.88899	31.2	1.32149	2.9511
31.22	3.63942	3.14602	31.22	1.30487	2.89068
31.24	3.6917	2.57181	31.24	1.35745	2.8414
31.26	3.80692	2.67679	31.26	1.46589	2.69765
31.28	3.8182	2.57375	31.28	1.41839	3.11614
31.3	3.67456	2.87299	31.3	1.42612	3.11073
31.32	3.71365	2.80658	31.32	1.46285	2.92464
31.34	3.82248	2.37361	31.34	1.40098	2.94749
31.36	3.88906	2.40776	31.36	1.36943	2.72223
31.38	3.70111	2.4419	31.38	1.41776	2.2881
31.4	3.8873	2.35232	31.4	1.3054	2.47295
31.42	3.92212	2.43382	31.42	1.36255	2.97139
31.44	3.79398	2.39464	31.44	1.36763	2.64556
31.46	3.90494	2.6685	31.46	1.41451	2.99815
31.48	3.73276	2.49147	31.48	1.40175	2.62324
31.5	3.8257	2.60087	31.5	1.41128	2.76016
31.52	3.90708	2.61603	31.52	1.35274	2.8382
31.54	3.87702	2.485	31.54	1.40025	2.79729
31.56	3.90258	2.43118	31.56	1.41246	3.06243
31.58	3.79801	2.64129	31.58	1.46332	2.43371
31.6	3.78388	2.67083	31.6	1.47752	2.35142
31.62	3.81036	2.83213	31.62	1.53319	2.53584
31.64	3.74412	2.52151	31.64	1.46677	2.42747
31.66	3.83842	2.84729	31.66	1.38261	2.02175
31.68	3.61839	2.88707	31.68	1.39334	2.35591
31.7	3.73308	2.42777	31.7	1.40463	2.05356
31.72	3.80524	2.33068	31.72	1.41241	2.76111
31.74	3.94573	2.41912	31.74	1.39728	2.90921
31.76	3.8073	2.72273	31.76	1.40241	2.95481
31.78	3.92502	2.33392	31.78	1.42621	3.05185
31.8	3.69444	2.40063	31.8	1.37738	2.9206
31.82	3.76473	2.70645	31.82	1.44293	3.14924
31.84	3.77566	2.49674	31.84	1.46479	3.11561
31.86	3.68251	2.52766	31.86	1.43321	2.84798
31.88	3.75529	2.57545	31.88	1.37702	2.70755
31.9	3.84333	2.83651	31.9	1.40648	2.7877
31.92	3.79515	2.63062	31.92	1.47485	2.71439
31.94	3.70007	2.97399	31.94	1.44043	2.78836
31.96	3.77539	2.48825	31.96	1.47447	2.61691
31.98	3.76911	2.58188	31.98	1.52902	2.68657
32	3.72909	2.80131	32	1.45833	2.8364
32.02	3.85199	2.46308	32.02	1.46804	2.80126
32.04	3.83921	2.49477	32.04	1.56435	2.77366
32.06	3.7657	2.59513	32.06	1.55331	2.5006
32.08	3.80544	2.37465	32.08	1.55838	2.77853
32.1	3.62685	2.33383	32.1	1.54596	2.80106
32.12	3.77627	2.3486	32.12	1.65947	2.36879
32.14	3.76616	2.58158	32.14	1.54993	2.61765
32.16	3.66392	2.54417	32.16	1.58549	2.89793
32.18	3.6745	2.40599	32.18	1.56442	2.65051
32.2	3.72599	2.72177	32.2	1.47771	2.39194
32.22	3.81477	2.61643	32.22	1.42042	2.81399
32.24	3.8443	2.445	32.24	1.48513	2.92453
32.26	3.86925	2.31939	32.26	1.4725	2.87519
32.28	3.83048	2.4037	32.28	1.51581	2.77404
32.3	3.8216	2.50588	32.3	1.51607	2.92008
32.32	3.59336	2.42196	32.32	1.45366	2.80206
32.34	3.72901	2.48507	32.34	1.49478	2.76378
32.36	3.71434	2.59477	32.36	1.53394	2.8965
32.38	3.65768	2.4328	32.38	1.41444	3.05055
32.4	3.63155	2.49205	32.4	1.44401	3.09234
32.42	3.72857	2.52036	32.42	1.46567	3.15551
32.44	3.6928	2.77923	32.44	1.47358	3.2124
32.46	3.74462	2.48215	32.46	1.45348	3.14751
32.48	3.74148	2.36826	32.48	1.42668	3.19185
32.5	3.75607	2.42297	32.5	1.45804	3.09086
32.52	3.72468	2.62139	32.52	1.41459	2.97475
32.54	3.69393	2.41473	32.54	1.56062	2.84911
32.56	3.69541	2.2917	32.56	1.4327	2.79647
32.58	3.69532	2.41273	32.58	1.48564	2.92889
32.6	3.7488	2.4055	32.6	1.56616	2.99731
32.62	3.68473	2.51548	32.62	1.55735	3.00572
32.64	3.7922	2.43033	32.64	1.52736	2.81512
32.66	3.75739	2.4709	32.66	1.56213	2.73495
32.68	3.74627	2.59949	32.68	1.53609	2.66875
32.7	3.63314	2.3919	32.7	1.48074	2.47417
32.72	3.60624	2.57989	32.72	1.53993	2.45891
32.74	3.7238	2.62692	32.74	1.5864	2.81985
32.76	3.65446	2.60714	32.76	1.53513	2.60892
32.78	3.58855	2.55233	32.78	1.47637	2.55398
32.8	3.68216	2.57818	32.8	1.56027	2.40941
32.82	3.71022	2.43271	32.82	1.50422	2.49242
32.84	3.67301	2.35935	32.84	1.53064	2.61849
32.86	3.82247	2.59199	32.86	1.50489	2.63165
32.88	3.72165	2.44641	32.88	1.50014	2.4664
32.9	3.7532	2.43857	32.9	1.49682	2.57213
32.92	3.88988	2.4442	32.92	1.48071	2.5408
32.94	3.83102	2.55646	32.94	1.47454	2.55899
32.96	3.72266	2.66247	32.96	1.44177	2.5993
32.98	3.65899	2.78862	32.98	1.42131	2.68881
33	3.79636	2.50556	33	1.45219	2.62424
33.02	3.74771	2.23245	33.02	1.34448	2.63504
33.04	3.7985	2.33633	33.04	1.4185	2.57659
33.06	3.72209	2.56961	33.06	1.46205	2.54256
33.08	3.75225	2.39251	33.08	1.45617	2.56688
33.1	3.72023	2.31944	33.1	1.40526	2.67107
33.12	3.6769	2.6298	33.12	1.45268	2.68628
33.14	3.79152	2.45121	33.14	1.36762	2.7918
33.16	3.68806	2.42391	33.16	1.41474	2.72637
33.18	3.77025	2.52306	33.18	1.3938	2.55378
33.2	3.7744	2.37461	33.2	1.41594	2.45881
33.22	3.8367	2.69417	33.22	1.52842	2.3495
33.24	3.65798	2.65208	33.24	1.55494	2.5761
33.26	3.71901	2.52874	33.26	1.52012	2.62002
33.28	3.82398	2.47415	33.28	1.56755	2.6672
33.3	3.68382	2.43978	33.3	1.59227	2.7193
33.32	3.56604	2.5249	33.32	1.50987	2.56055
33.34	3.7035	2.87997	33.34	1.5602	2.613
33.36	3.62751	2.95458	33.36	1.4183	2.7271
33.38	3.82594	2.89109	33.38	1.56759	2.49247
33.4	3.81839	2.44691	33.4	1.46474	2.67894
33.42	3.87422	2.4592	33.42	1.45394	2.68565
33.44	3.81278	2.48318	33.44	1.47739	2.47891
33.46	3.84249	2.40507	33.46	1.49764	2.41263
33.48	3.91098	2.56319	33.48	1.40268	2.53153
33.5	3.88536	2.5143	33.5	1.50888	2.44106
33.52	3.77175	2.44424	33.52	1.44433	2.65685
33.54	3.74275	2.5623	33.54	1.33944	2.73882
33.56	3.73738	2.53906	33.56	1.42649	2.81794
33.58	3.86452	2.2353	33.58	1.34474	2.91879
33.6	3.76	2.90477	33.6	1.39363	3.11082
33.62	3.89146	2.80435	33.62	1.46559	2.93715
33.64	3.79171	2.56191	33.64	1.55079	2.8158
33.66	3.77651	2.64341	33.66	1.45875	3.03733
33.68	3.7016	2.45864	33.68	1.5433	3.22605
33.7	3.7014	2.36117	33.7	1.52285	2.90707
33.72	3.73219	2.53112	33.72	1.4692	2.90876
33.74	3.6917	2.42613	33.74	1.48117	2.94243
33.76	3.64823	2.42378	33.76	1.47984	3.00845
33.78	3.58708	2.32499	33.78	1.37766	2.97527
33.8	3.69061	2.50415	33.8	1.42352	3.10427
33.82	3.65555	2.42064	33.82	1.53229	3.05143
33.84	3.75451	2.51646	33.84	1.54466	2.92986
33.86	3.7374	2.43726	33.86	1.41205	3.08776
33.88	3.64456	2.59397	33.88	1.41615	3.16663
33.9	3.7262	2.56481	33.9	1.36937	3.11503
33.92	3.74937	2.5211	33.92	1.36652	3.07335
33.94	3.8032	2.63788	33.94	1.39183	2.97763
33.96	3.52896	2.47174	33.96	1.41161	2.9187
33.98	3.61493	2.57232	33.98	1.41878	2.75152
34	3.69928	2.4901	34	1.46537	2.71501
34.02	3.70056	2.50235	34.02	1.54833	2.72408
34.04	3.90067	2.42464	34.04	1.40477	3.25265
34.06	3.84651	2.4277	34.06	1.44633	3.12128
34.08	3.77569	2.51221	34.08	1.41022	3.05233
34.1	3.74137	2.3629	34.1	1.35366	3.12752
34.12	3.66099	2.44116	34.12	1.50994	2.86716
34.14	3.61674	2.347	34.14	1.53083	3.03426
34.16	3.56591	2.40823	34.16	1.40799	3.20153
34.18	3.72607	2.42595	34.18	1.45791	3.14689
34.2	3.69026	2.48564	34.2	1.47443	2.80848
34.22	3.42933	2.57592	34.22	1.37546	2.87784
34.24	3.59939	2.50273	34.24	1.45553	3.12165
34.26	3.71263	2.79407	34.26	1.38306	2.91514
34.28	3.57089	2.78268	34.28	1.41155	3.16315
34.3	3.65128	2.80131	34.3	1.44487	3.10989
34.32	3.75632	2.57736	34.32	1.40204	2.896
34.34	3.46314	2.47325	34.34	1.4182	2.83919
34.36	3.50233	2.5369	34.36	1.4592	2.97272
34.38	3.61551	2.41844	34.38	1.50058	3.08845
34.4	3.66258	2.18622	34.4	1.50616	2.98628
34.42	3.82626	2.41103	34.42	1.35222	2.89039
34.44	3.74659	2.24919	34.44	1.44578	2.90396
34.46	3.83968	2.5726	34.46	1.38237	3.01688
34.48	3.78007	2.59411	34.48	1.35961	3.06299
34.5	3.79631	2.51005	34.5	1.41665	3.13463
34.52	3.72853	2.58037	34.52	1.31461	3.04237
34.54	3.70881	2.53929	34.54	1.39985	2.99381
34.56	3.76368	2.79599	34.56	1.37112	2.99568
34.58	3.80407	2.85384	34.58	1.44259	3.13806
34.6	3.96418	2.80091	34.6	1.55221	3.00384
34.62	3.98578	2.78894	34.62	1.50528	2.97413
34.64	3.99498	2.6046	34.64	1.40636	3.1382
34.66	3.94509	2.60397	34.66	1.39056	3.11268
34.68	4.01494	2.60139	34.68	1.38177	3.08993
34.7	3.91146	2.41119	34.7	1.43875	2.89396
34.72	4.18041	2.53042	34.72	1.44468	3.17511
34.74	4.14504	2.55341	34.74	1.5159	3.0625
34.76	4.03361	2.4996	34.76	1.54689	3.04734
34.78	4.09025	2.48365	34.78	1.52726	3.13307
34.8	4.01651	2.49605	34.8	1.49451	3.21721
34.82	3.93272	2.53995	34.82	1.48827	2.95514
34.84	3.90629	2.70305	34.84	1.51309	2.62804
34.86	3.74325	2.73258	34.86	1.50724	2.66272
34.88	3.84035	2.99976	34.88	1.44727	2.65792
34.9	3.82729	2.63272	34.9	1.52952	2.53009
34.92	3.72125	2.97226	34.92	1.49188	2.44218
34.94	3.70992	2.81563	34.94	1.5408	2.65295
34.96	3.73579	3.06588	34.96	1.4765	2.53259
34.98	3.8581	2.97193	34.98	1.49334	2.55733
35	3.78256	2.70863	35	1.57004	2.64574
35.02	3.81086	2.71465	35.02	1.55333	2.72371
35.04	3.80169	2.83355	35.04	1.54945	2.75676
35.06	3.91413	2.83558	35.06	1.50884	2.54208
35.08	3.93193	2.79181	35.08	1.43699	2.90473
35.1	3.9044	2.73745	35.1	1.42602	2.63261
35.12	3.97398	2.76149	35.12	1.53886	2.92539
35.14	3.96975	2.66644	35.14	1.59195	2.6757
35.16	3.9605	2.71925	35.16	1.60051	2.86219
35.18	3.85962	3.2856	35.18	1.43629	2.47948
35.2	3.83128	2.6924	35.2	1.39857	2.719
35.22	3.88575	2.69648	35.22	1.46244	2.78062
35.24	3.78528	2.71192	35.24	1.51193	2.81872
35.26	3.93863	2.69832	35.26	1.43371	2.90057
35.28	3.98694	2.56488	35.28	1.452	2.78032
35.3	4.02764	2.60543	35.3	1.39248	2.66806
35.32	4.05133	2.64455	35.32	1.53698	2.66686
35.34	4.00769	2.44952	35.34	1.53334	2.73037
35.36	3.98721	2.79568	35.36	1.48457	2.68556
35.38	4.01838	2.61768	35.38	1.51925	2.76344
35.4	3.98679	2.56649	35.4	1.42861	2.7018
35.42	3.91844	2.74402	35.42	1.49594	2.71858
35.44	4.01838	2.73736	35.44	1.51293	2.55331
35.46	4.04099	3.13576	35.46	1.54999	3.05795
35.48	4.02448	3.02448	35.48	1.38807	2.96665
35.5	3.97722	2.94489	35.5	1.42911	2.99523
35.52	3.94943	3.04552	35.52	1.41083	3.00957
35.54	3.87234	3.11372	35.54	1.45895	2.84816
35.56	3.94141	3.20019	35.56	1.41912	2.50643
35.58	3.93538	3.17129	35.58	1.47175	2.47633
35.6	4.07795	3.21599	35.6	1.4984	2.58358
35.62	4.05602	3.20472	35.62	1.48249	2.51372
35.64	3.99317	3.05915	35.64	1.4653	2.54589
35.66	3.977	3.08253	35.66	1.46337	2.5544
35.68	3.96763	3.14597	35.68	1.49759	2.62532
35.7	3.98577	3.07236	35.7	1.3955	2.75327
35.72	3.90874	3.06922	35.72	1.40085	2.71375
35.74	3.88949	2.98226	35.74	1.397	2.6508
35.76	3.95835	2.89991	35.76	1.41445	2.4784
35.78	3.99164	2.84387	35.78	1.34589	2.67448
35.8	3.95575	2.95974	35.8	1.28086	2.73904
35.82	3.9431	3.03	35.82	1.20045	2.81545
35.84	3.98834	2.98676	35.84	1.29563	2.61356
35.86	3.96859	2.97688	35.86	1.27977	2.70782
35.88	3.95339	3.04477	35.88	1.31618	2.47112
35.9	3.93998	2.8602	35.9	1.30899	2.5472
35.92	3.97817	2.83435	35.92	1.25326	2.79477
35.94	3.93016	2.9791	35.94	1.33454	2.80237
35.96	3.87476	3.02796	35.96	1.34431	2.82254
35.98	3.9615	2.94735	35.98	1.36612	2.91979
36	3.94292	2.86424	36	1.37419	2.80837
36.02	4.02357	2.91886	36.02	1.37722	3.01427
36.04	4.01119	2.95946	36.04	1.32342	2.58549
36.06	4.07889	3.03568	36.06	1.2873	2.75621
36.08	4.07148	2.91338	36.08	1.37788	2.66391
36.1	4.07586	2.98047	36.1	1.35472	2.5859
36.12	4.00919	3.01351	36.12	1.39031	2.6071
36.14	3.9428	2.94654	36.14	1.34206	2.45616
36.16	3.93337	2.94038	36.16	1.35672	2.64404
36.18	3.89738	2.94361	36.18	1.32457	2.58244
36.2	4.05698	2.8881	36.2	1.27963	2.74322
36.22	3.92539	2.98567	36.22	1.34137	2.76142
36.24	3.98733	2.94686	36.24	1.34867	2.5153
36.26	3.89717	3.00562	36.26	1.4091	2.53257
36.28	3.87843	2.67677	36.28	1.38522	2.54571
36.3	3.91443	2.85199	36.3	1.34336	2.65091
36.32	4.01184	2.60275	36.32	1.43581	2.57462
36.34	3.98333	2.97637	36.34	1.37289	2.92451
36.36	3.94222	3.10093	36.36	1.34551	2.77095
36.38	4.03063	3.00626	36.38	1.29481	2.35442
36.4	4.01359	2.86775	36.4	1.40589	2.47274
36.42	3.9659	2.87484	36.42	1.40751	2.51738
36.44	4.02654	2.90915	36.44	1.39605	2.45866
36.46	3.91538	2.91852	36.46	1.29018	2.44419
36.48	3.94653	2.85071	36.48	1.32716	2.65659
36.5	3.95062	2.89568	36.5	1.28268	2.52317
36.52	3.99411	2.68784	36.52	1.29136	2.07884
36.54	3.91186	2.70476	36.54	1.2793	3.02955
36.56	3.92012	2.69017	36.56	1.26587	2.46608
36.58	3.83347	2.68818	36.58	1.27294	2.45469
36.6	3.88721	2.93876	36.6	1.30582	2.50592
36.62	3.8824	2.58637	36.62	1.33591	2.5416
36.64	3.86067	2.87883	36.64	1.32162	2.87799
36.66	3.9779	2.9684	36.66	1.37099	2.51732
36.68	3.97476	2.93318	36.68	1.41562	2.37444
36.7	4.00471	2.96374	36.7	1.34973	2.68707
36.72	4.02398	2.75771	36.72	1.36421	2.53146
36.74	4.02382	2.88629	36.74	1.30057	2.55449
36.76	3.87421	2.76102	36.76	1.43924	2.44049
36.78	3.98418	2.9644	36.78	1.37193	2.64694
36.8	3.96417	2.96	36.8	1.29798	2.51849
36.82	3.97133	2.85458	36.82	1.30867	2.78581
36.84	4.05365	2.9186	36.84	1.26471	2.61883
36.86	3.9352	2.87841	36.86	1.31444	2.57405
36.88	4.07369	2.6837	36.88	1.24731	2.57399
36.9	3.9903	2.71705	36.9	1.34594	2.51023
36.92	4.0711	2.63049	36.92	1.29182	2.71126
36.94	4.03292	2.89069	36.94	1.25154	2.88868
36.96	4.02483	2.73307	36.96	1.36345	2.90168
36.98	4.00713	2.6722	36.98	1.39627	2.80625
37	3.91917	2.54605	37	1.35623	2.93439
37.02	3.99257	2.73976	37.02	1.33434	3.01335
37.04	3.93551	2.81984	37.04	1.37851	3.06599
37.06	4.03774	2.79279	37.06	1.26914	3.07327
37.08	3.97032	2.91896	37.08	1.30926	2.67356
37.1	3.96304	2.8347	37.1	1.26583	2.53399
37.12	3.97166	2.83729	37.12	1.33765	2.53383
37.14	3.92953	2.97086	37.14	1.30666	2.98611
37.16	3.96043	2.86747	37.16	1.35237	2.6206
37.18	3.95002	2.97851	37.18	1.38411	2.5178
37.2	3.99912	3.00198	37.2	1.36077	2.48689
37.22	3.88027	2.90913	37.22	1.27921	2.71129
37.24	3.97584	2.89883	37.24	1.35318	2.41085
37.26	3.91197	2.98325	37.26	1.27803	2.8304
37.28	3.96175	2.71563	37.28	1.29119	2.93853
37.3	4.01404	2.63671	37.3	1.33777	2.79812
37.32	4.02314	2.87324	37.32	1.35309	2.64469
37.34	4.07373	2.85618	37.34	1.33797	2.80433
37.36	4.01154	2.83661	37.36	1.29367	2.78584
37.38	4.05938	3.01314	37.38	1.32847	2.80372
37.4	3.97549	2.91591	37.4	1.2883	2.77979
37.42	3.93609	2.99439	37.42	1.3353	3.04589
37.44	4.00839	2.65366	37.44	1.34069	2.46415
37.46	3.97077	2.66887	37.46	1.41793	2.93954
37.48	4.00411	2.59652	37.48	1.3956	2.80255
37.5	4.00933	2.74488	37.5	1.41151	2.77364
37.52	3.97125	2.87486	37.52	1.4397	2.70143
37.54	3.97612	2.85092	37.54	1.473	2.67496
37.56	4.04696	2.71571	37.56	1.45302	2.88412
37.58	4.05801	2.72034	37.58	1.43593	2.78417
37.6	3.91991	2.88346	37.6	1.45429	3.06471
37.62	3.95455	2.92573	37.62	1.37067	3.05525
37.64	3.90345	2.85501	37.64	1.42199	3.17494
37.66	3.86628	2.82609	37.66	1.43023	2.84705
37.68	3.88366	2.96512	37.68	1.40406	3.14499
37.7	3.85897	3.2422	37.7	1.38146	2.99308
37.72	3.85673	2.82265	37.72	1.43221	2.90222
37.74	3.74142	2.57618	37.74	1.30491	2.85846
37.76	3.89778	2.87684	37.76	1.39022	2.99001
37.78	3.88481	2.81234	37.78	1.29958	2.98518
37.8	3.97073	2.93513	37.8	1.37167	3.18362
37.82	3.95387	2.90744	37.82	1.32945	3.1454
37.84	3.82909	3.12531	37.84	1.29517	3.10771
37.86	3.80606	2.95738	37.86	1.34382	3.1355
37.88	3.8965	3.05129	37.88	1.30217	3.05937
37.9	3.92837	2.8922	37.9	1.34474	3.1872
37.92	3.89424	2.98512	37.92	1.38246	3.11126
37.94	3.86975	3.088	37.94	1.39014	3.03553
37.96	3.95021	2.85649	37.96	1.45222	2.89593
37.98	3.95924	2.96481	37.98	1.36987	3.20425
38	3.96858	2.99865	38	1.31301	3.01686
38.02	3.97153	3.00126	38.02	1.30319	3.15447
38.04	3.89054	3.07508	38.04	1.42991	2.97771
38.06	3.86406	3.00976	38.06	1.32062	3.04666
38.08	3.91249	3.01463	38.08	1.39372	3.16012
38.1	3.92003	3.22134	38.1	1.40499	3.21626
38.12	3.95415	3.03338	38.12	1.42892	3.20473
38.14	3.9889	2.96098	38.14	1.3674	2.8243
38.16	3.94574	2.88679	38.16	1.41901	3.05248
38.18	3.94057	3.1087	38.18	1.28316	2.90968
38.2	3.96067	2.85898	38.2	1.39669	3.05758
38.22	3.8806	2.85528	38.22	1.32667	2.788
38.24	3.84922	3.05225	38.24	1.39973	3.13491
38.26	3.85767	2.37363	38.26	1.38629	2.92904
38.28	3.89794	1.97355	38.28	1.37049	2.93918
38.3	3.9245	1.99553	38.3	1.31432	2.71562
38.32	3.83821	1.2601	38.32	1.34322	2.62327
38.34	3.72971	1.23373	38.34	1.33977	2.73751
38.36	3.9189	1.19507	38.36	1.42527	2.41492
38.38	3.78305	1.11531	38.38	1.39869	2.97762
38.4	3.86143	1.32568	38.4	1.38469	2.59702
38.42	3.79842	1.41299	38.42	1.39595	2.56877
38.44	3.84141	1.91204	38.44	1.37844	2.68165
38.46	3.77248	2.15223	38.46	1.40189	2.97063
38.48	3.73481	2.32902	38.48	1.33686	3.09746
38.5	3.76509	2.65207	38.5	1.40238	2.83782
38.52	3.65669	2.85657	38.52	1.39578	2.98742
38.54	3.71844	2.69046	38.54	1.37564	3.01709
38.56	3.66695	2.51913	38.56	1.3813	2.87983
38.58	3.73163	2.87331	38.58	1.37132	2.86264
38.6	3.80432	2.85359	38.6	1.36064	2.83066
38.62	3.8477	2.60585	38.62	1.31079	2.91342
38.64	3.72259	2.77998	38.64	1.42939	2.75094
38.66	3.76589	2.78898	38.66	1.39419	3.05964
38.68	3.70809	2.47681	38.68	1.46545	2.98653
38.7	3.81153	2.81261	38.7	1.49002	2.95796
38.72	3.83152	2.26777	38.72	1.46791	3.03116
38.74	3.70819	2.64856	38.74	1.48474	2.81713
38.76	3.81132	2.55715	38.76	1.43304	2.77575
38.78	3.79986	3.05965	38.78	1.49072	3.00582
38.8	3.66605	3.04022	38.8	1.41587	2.75033
38.82	3.73785	2.92452	38.82	1.5382	2.96971
38.84	3.66911	2.8844	38.84	1.62322	3.25351
38.86	3.78348	2.61796	38.86	1.57407	3.10044
38.88	3.70243	2.86329	38.88	1.42264	3.16298
38.9	3.67903	2.69066	38.9	1.33248	3.03584
38.92	3.75052	2.85429	38.92	1.45129	3.08212
38.94	3.73288	2.86318	38.94	1.48619	3.06454
38.96	3.74434	3.00379	38.96	1.44224	2.99353
38.98	3.807	3.02515	38.98	1.4473	3.02446
39	3.7846	2.87836	39	1.5189	3.0345
39.02	3.67085	3.07963	39.02	1.47164	3.01377
39.04	3.80946	2.78759	39.04	1.52671	2.97191
39.06	3.84707	2.88198	39.06	1.60639	3.09644
39.08	3.77503	2.54807	39.08	1.41688	2.97632
39.1	3.78759	2.64537	39.1	1.54961	3.04518
39.12	3.73938	2.39399	39.12	1.50623	3.02427
39.14	3.80656	2.22185	39.14	1.57538	3.02016
39.16	3.77472	2.3702	39.16	1.49958	3.09412
39.18	3.88223	2.43309	39.18	1.55114	3.3218
39.2	4.02891	2.47343	39.2	1.46532	3.25073
39.22	4.01609	2.33136	39.22	1.43161	2.96687
39.24	3.98589	2.24785	39.24	1.47718	2.73829
39.26	3.92871	2.41224	39.26	1.40186	3.04025
39.28	3.9894	2.80899	39.28	1.5219	2.78707
39.3	3.92836	2.97648	39.3	1.45336	2.85106
39.32	4.01835	2.759	39.32	1.49504	3.20073
39.34	3.95146	2.76006	39.34	1.42684	3.20288
39.36	4.10544	2.83645	39.36	1.62098	3.15174
39.38	4.00764	3.03235	39.38	1.52002	3.25835
39.4	4.02336	3.0341	39.4	1.4464	3.12562
39.42	4.03635	3.23009	39.42	1.50264	3.02779
39.44	3.94258	3.14897	39.44	1.48809	3.28914
39.46	3.88586	2.97192	39.46	1.53046	3.04335
39.48	3.90405	2.93451	39.48	1.44227	3.11392
39.5	4.03729	2.9027	39.5	1.55867	3.11818
39.52	3.909	2.76467	39.52	1.60283	2.96118
39.54	3.9428	2.8137	39.54	1.58268	3.29396
39.56	3.85011	2.7841	39.56	1.63009	3.10208
39.58	3.8056	3.00513	39.58	1.70802	3.16716
39.6	3.82665	2.59381	39.6	1.53314	3.09951
39.62	3.87498	2.7989	39.62	1.59527	2.98415
39.64	3.80808	2.72362	39.64	1.55317	3.13727
39.66	3.83388	2.708	39.66	1.56581	2.90685
39.68	3.84402	2.68695	39.68	1.52018	2.81875
39.7	3.85983	2.92985	39.7	1.52262	2.95459
39.72	3.90718	2.96781	39.72	1.51426	3.08267
39.74	3.86293	2.94249	39.74	1.52686	2.91589
39.76	3.91579	2.9347	39.76	1.41606	3.16026
39.78	3.7896	3.0118	39.78	1.43034	3.08993
39.8	3.78778	2.84456	39.8	1.41855	3.11389
39.82	3.86671	2.90624	39.82	1.48169	3.03865
39.84	3.81859	3.00211	39.84	1.52313	2.86249
39.86	3.8491	2.79756	39.86	1.4333	2.83828
39.88	3.80165	2.88287	39.88	1.59183	2.88893
39.9	3.80896	2.72682	39.9	1.48407	3.14152
39.92	3.81874	2.8789	39.92	1.56335	3.20311
39.94	3.78185	2.90209	39.94	1.52204	3.00933
39.96	3.7581	2.83162	39.96	1.46045	3.18957
39.98	3.78792	2.90572	39.98	1.39691	2.87927
[truncated: 502 more rows]

## Sheet: Codeine
Time (ns)	protein_ARG1	LIG_Codeine	Time (ns)	protein_ARG2	LIG_Codeine
0.02	0.853153	0.248205	0.02	0.654557	0.32875
0.04	0.986126	0.309843	0.04	0.732182	0.634377
0.06	1.03865	0.467346	0.06	0.821735	0.65006
0.08	1.1334	0.265244	0.08	0.885268	0.583708
0.1	1.20686	0.508456	0.1	0.841131	0.526571
0.12	1.23888	0.723291	0.12	0.87366	0.659489
0.14	1.17678	0.754733	0.14	0.954899	1.00674
0.16	1.10009	0.562484	0.16	1.11461	0.490742
0.18	1.12453	0.652701	0.18	1.13184	0.825704
0.2	1.06054	0.805236	0.2	1.04176	0.600869
0.22	1.19066	0.608141	0.22	0.99718	0.702386
0.24	1.44085	0.735595	0.24	0.950123	0.785811
0.26	1.46266	0.431141	0.26	1.08522	0.72701
0.28	1.42731	0.74027	0.28	1.03779	0.717831
0.3	1.41619	0.3084	0.3	0.988755	0.742664
0.32	1.51225	0.410828	0.32	1.14432	0.75748
0.34	1.70784	0.388724	0.34	1.10017	0.894109
0.36	1.67549	0.622753	0.36	1.04968	0.722806
0.38	1.66665	0.627964	0.38	1.0976	0.582961
0.4	1.54832	0.539715	0.4	1.14883	0.626121
0.42	1.50319	0.694961	0.42	1.10756	0.666081
0.44	1.53441	0.69543	0.44	1.18455	0.860092
0.46	1.45841	0.705852	0.46	1.16433	0.745928
0.48	1.47195	0.577686	0.48	1.17755	0.677236
0.5	1.37729	0.768564	0.5	1.18196	0.699862
0.52	1.32625	0.763997	0.52	1.14738	0.348401
0.54	1.46497	0.592693	0.54	1.14051	0.547265
0.56	1.49961	0.62782	0.56	1.15287	0.275392
0.58	1.41988	0.541857	0.58	1.27238	0.508448
0.6	1.55766	0.353217	0.6	1.3033	0.51674
0.62	1.60055	0.960915	0.62	1.18248	0.777736
0.64	1.5111	0.583566	0.64	1.19197	0.887882
0.66	1.7094	0.558893	0.66	1.08995	0.832844
0.68	1.62013	0.673342	0.68	1.12089	0.826035
0.7	1.60087	0.699888	0.7	1.17202	1.0088
0.72	1.64851	0.682885	0.72	1.22022	0.732208
0.74	1.56648	0.623424	0.74	1.18135	0.826984
0.76	1.54814	0.282934	0.76	1.2016	0.58361
0.78	1.5254	0.447149	0.78	1.31892	0.556743
0.8	1.65891	0.52409	0.8	1.31676	0.570442
0.82	1.64087	0.60186	0.82	1.22391	0.654899
0.84	1.65959	0.405643	0.84	1.21526	0.53572
0.86	1.69361	0.374995	0.86	1.29584	0.941799
0.88	1.66591	0.790234	0.88	1.17411	0.887742
0.9	1.78628	0.804261	0.9	1.20039	0.86412
0.92	1.69044	0.882482	0.92	1.16791	0.8846
0.94	1.65561	0.91002	0.94	1.27095	0.864013
0.96	1.67345	0.572271	0.96	1.16607	0.785485
0.98	1.53758	0.492541	0.98	1.23905	0.777608
1	1.62811	0.874001	1	1.23877	0.800024
1.02	1.68168	0.872936	1.02	1.34292	0.96196
1.04	1.69105	0.5545	1.04	1.43915	0.860543
1.06	1.63499	0.559619	1.06	1.4004	0.682074
1.08	1.59443	0.53545	1.08	1.4529	0.795463
1.1	1.63363	0.532568	1.1	1.36517	0.809604
1.12	1.7161	0.796807	1.12	1.30545	0.770384
1.14	1.60817	0.884183	1.14	1.51585	0.803019
1.16	1.45938	0.879991	1.16	1.37043	0.965125
1.18	1.54576	0.878158	1.18	1.3628	0.865115
1.2	1.61477	0.806271	1.2	1.51166	0.80014
1.22	1.63479	0.837729	1.22	1.47281	0.787158
1.24	1.62409	0.8016	1.24	1.47484	0.57882
1.26	1.53356	0.914285	1.26	1.45864	0.755404
1.28	1.67073	0.776938	1.28	1.40596	0.760969
1.3	1.75927	0.854091	1.3	1.44655	0.662837
1.32	1.64885	0.718469	1.32	1.53706	0.923699
1.34	1.60747	0.762195	1.34	1.42757	0.887653
1.36	1.80989	0.835147	1.36	1.51754	0.908278
1.38	1.7092	0.821134	1.38	1.47287	0.833731
1.4	1.64584	0.778843	1.4	1.42525	0.633516
1.42	1.7198	0.84233	1.42	1.40106	0.782799
1.44	1.72366	0.807235	1.44	1.43653	0.66386
1.46	1.77963	0.896925	1.46	1.4311	0.8322
1.48	1.89608	0.829778	1.48	1.48272	0.763823
1.5	1.86219	0.511434	1.5	1.53122	0.864925
1.52	1.79648	0.552248	1.52	1.53477	0.932788
1.54	1.79366	0.566778	1.54	1.4216	0.792877
1.56	1.83585	0.544487	1.56	1.48805	0.765974
1.58	1.932	0.512782	1.58	1.5472	0.774598
1.6	1.89704	0.498019	1.6	1.53725	0.61185
1.62	1.96049	0.527762	1.62	1.66626	0.615948
1.64	1.86907	0.52903	1.64	1.61831	0.887939
1.66	1.88232	0.49951	1.66	1.63376	0.681353
1.68	1.99054	0.554697	1.68	1.60649	0.747477
1.7	2.1227	0.317033	1.7	1.60775	0.767036
1.72	2.26614	0.250158	1.72	1.6083	0.903485
1.74	2.34015	0.533071	1.74	1.59531	0.799399
1.76	2.22372	0.55629	1.76	1.47594	0.688656
1.78	2.16413	0.559318	1.78	1.60623	0.622626
1.8	2.08762	0.844042	1.8	1.62701	0.671896
1.82	2.36823	0.899845	1.82	1.68074	0.967327
1.84	2.49788	0.824971	1.84	1.61244	0.85146
1.86	2.39716	0.844855	1.86	1.68616	0.888309
1.88	2.32998	0.858952	1.88	1.67565	0.532667
1.9	2.27956	0.862139	1.9	1.60287	0.91531
1.92	2.27763	0.883986	1.92	1.54182	0.768633
1.94	2.25826	0.853471	1.94	1.52762	0.989091
1.96	2.35562	0.890112	1.96	1.56652	0.797305
1.98	2.31095	0.571014	1.98	1.65734	0.751941
2	2.36017	0.29888	2	1.57246	0.647286
2.02	2.35499	0.565583	2.02	1.50891	0.940576
2.04	2.30999	0.461211	2.04	1.51159	0.795757
2.06	2.50139	0.821762	2.06	1.54007	0.764506
2.08	2.39796	0.961953	2.08	1.63498	0.712496
2.1	2.64188	0.906443	2.1	1.63477	0.807571
2.12	2.68106	0.234156	2.12	1.59697	0.798355
2.14	2.48969	0.868573	2.14	1.7228	0.614567
2.16	2.49947	0.807753	2.16	1.64429	0.871515
2.18	2.50033	0.795575	2.18	1.49836	0.895036
2.2	2.38466	0.851427	2.2	1.60274	0.837452
2.22	2.47499	0.498999	2.22	1.6002	0.699826
2.24	2.79132	0.508429	2.24	1.53828	0.688934
2.26	2.6226	0.814814	2.26	1.63627	0.898117
2.28	2.56202	0.847268	2.28	1.52741	0.917659
2.3	2.53196	0.72421	2.3	1.61494	0.677583
2.32	2.62779	0.278996	2.32	1.50597	0.841231
2.34	2.43526	0.834819	2.34	1.52942	0.88334
2.36	2.32826	0.827596	2.36	1.50585	0.689277
2.38	2.30344	0.92998	2.38	1.45383	0.671224
2.4	2.33788	0.511602	2.4	1.48956	0.681044
2.42	2.37047	0.497586	2.42	1.46998	0.753529
2.44	2.38251	0.533457	2.44	1.43996	0.593044
2.46	2.3155	0.617225	2.46	1.49433	0.895818
2.48	2.24891	0.81877	2.48	1.62152	0.684687
2.5	2.21191	0.531744	2.5	1.60049	0.654454
2.52	2.27347	0.581482	2.52	1.52265	0.573355
2.54	2.08231	0.269575	2.54	1.64592	0.707168
2.56	2.19125	0.577903	2.56	1.664	0.766312
2.58	2.10273	0.575447	2.58	1.69946	0.603664
2.6	2.16913	0.638394	2.6	1.67488	0.882743
2.62	2.09147	0.614606	2.62	1.69254	0.902606
2.64	2.08945	0.651434	2.64	1.74038	0.862207
2.66	2.22269	0.570579	2.66	1.77734	0.703836
2.68	2.02003	0.825561	2.68	1.76817	0.928456
2.7	2.22606	0.855696	2.7	1.74622	0.47694
2.72	2.3018	0.911706	2.72	1.83939	0.721931
2.74	2.18082	0.834944	2.74	1.81038	0.84518
2.76	2.16303	0.876639	2.76	1.85144	0.776729
2.78	1.99236	0.515728	2.78	1.70699	0.831165
2.8	2.00439	0.275562	2.8	1.70378	1.06346
2.82	2.13466	0.812258	2.82	1.79175	0.718515
2.84	2.1186	0.900839	2.84	1.73054	0.598159
2.86	2.07593	0.221237	2.86	1.66911	0.946036
2.88	2.0369	0.273171	2.88	1.6827	0.711273
2.9	1.95825	0.846299	2.9	1.8202	0.662035
2.92	2.06885	0.833138	2.92	1.73489	0.778419
2.94	2.23357	0.894835	2.94	1.73786	0.841155
2.96	2.33343	0.648593	2.96	1.89678	0.743072
2.98	2.18833	0.540363	2.98	1.86985	0.698936
3	2.20999	0.563231	3	1.76495	0.796859
3.02	2.37806	0.3082	3.02	1.86778	0.887401
3.04	2.58551	0.565842	3.04	1.83787	0.846415
3.06	2.44545	0.772535	3.06	1.80507	0.891476
3.08	2.48684	0.88656	3.08	1.66772	0.930885
3.1	2.75318	0.8671	3.1	1.77541	0.648055
3.12	2.57284	0.880477	3.12	1.76523	0.844101
3.14	2.59694	0.862736	3.14	1.77969	0.600022
3.16	2.56449	0.908856	3.16	1.76783	0.631903
3.18	2.44129	0.829778	3.18	1.6453	0.660784
3.2	2.57592	0.814768	3.2	1.77319	0.836968
3.22	2.29352	0.885818	3.22	1.81986	0.764556
3.24	2.38732	0.879401	3.24	1.75625	1.05758
3.26	2.23145	0.888717	3.26	1.73766	0.662448
3.28	2.24726	0.911778	3.28	1.77245	0.485557
3.3	2.21698	0.527163	3.3	1.72379	0.664473
3.32	2.17703	0.512618	3.32	1.79334	0.725519
3.34	2.21467	0.53612	3.34	1.79161	0.925834
3.36	2.14097	0.578232	3.36	1.80041	0.77838
3.38	2.08697	0.291214	3.38	1.78842	0.786774
3.4	1.98262	0.508329	3.4	1.79618	0.925914
3.42	2.04511	0.521092	3.42	1.8779	0.928701
3.44	2.06288	0.264739	3.44	1.7899	0.646894
3.46	1.97931	0.337995	3.46	1.8146	0.74
3.48	1.83286	0.476483	3.48	1.83788	0.748964
3.5	1.91884	0.30757	3.5	1.78365	0.80039
3.52	2.12925	0.274989	3.52	1.75552	0.660308
3.54	1.82922	0.301677	3.54	1.71676	0.377606
3.56	1.9998	0.278254	3.56	1.81345	0.64372
3.58	1.93844	0.237991	3.58	1.75766	0.851214
3.6	1.90908	0.564204	3.6	1.83373	0.724095
3.62	1.91244	0.555277	3.62	1.77152	0.709246
3.64	2.02864	0.548917	3.64	1.81591	0.849924
3.66	2.06805	0.622889	3.66	1.79272	0.934482
3.68	2.2344	0.700824	3.68	1.7604	0.803932
3.7	2.22237	0.583499	3.7	1.729	0.769799
3.72	2.01207	0.212207	3.72	1.84111	0.781664
3.74	1.92779	0.566119	3.74	1.73707	0.638616
3.76	2.09477	0.902299	3.76	1.67286	0.672522
3.78	2.16912	0.504929	3.78	1.70348	0.725229
3.8	2.18382	0.551598	3.8	1.75692	0.72727
3.82	2.20811	0.67841	3.82	1.69316	0.776717
3.84	2.12964	0.566173	3.84	1.73145	0.685369
3.86	2.14442	0.554436	3.86	1.75993	0.697474
3.88	2.03918	0.573629	3.88	1.69604	0.593641
3.9	1.83723	0.571998	3.9	1.79338	0.833674
3.92	2.01153	0.513852	3.92	1.76506	0.835895
3.94	2.12301	0.64142	3.94	1.64872	0.754896
3.96	2.26179	0.603233	3.96	1.79722	0.945617
3.98	2.05891	0.681149	3.98	1.65126	0.799193
4	2.14359	0.485613	4	1.6934	0.748198
4.02	2.17753	0.494765	4.02	1.69117	0.689645
4.04	2.10298	0.29383	4.04	1.69746	0.966388
4.06	2.00939	0.868036	4.06	1.70617	0.711232
4.08	2.10651	0.867404	4.08	1.63631	0.9061
4.1	2.24464	0.888997	4.1	1.56779	0.834064
4.12	2.25384	0.673808	4.12	1.66213	0.928909
4.14	2.10915	0.757743	4.14	1.72233	0.796233
4.16	2.1647	0.301086	4.16	1.7609	0.883913
4.18	2.21788	0.51736	4.18	1.74976	0.892182
4.2	2.20531	0.549956	4.2	1.67134	0.848683
4.22	2.19007	0.802094	4.22	1.63066	0.989733
4.24	2.24616	0.829452	4.24	1.55491	0.78536
4.26	2.27059	0.862021	4.26	1.57163	0.885577
4.28	2.28266	0.882219	4.28	1.6056	0.848106
4.3	2.26677	0.945099	4.3	1.5511	0.844364
4.32	2.3361	0.899311	4.32	1.59821	0.826235
4.34	2.39909	0.861657	4.34	1.58999	0.871122
4.36	2.40787	0.642028	4.36	1.57283	0.848381
4.38	2.46183	0.932207	4.38	1.66037	0.843081
4.4	2.51652	0.884534	4.4	1.60015	0.77298
4.42	2.61203	0.47767	4.42	1.5494	0.735399
4.44	2.75242	0.840387	4.44	1.56247	0.713294
4.46	2.62217	0.91344	4.46	1.66318	0.770023
4.48	2.67176	0.882775	4.48	1.56144	0.846182
4.5	2.46127	0.869104	4.5	1.66704	0.87091
4.52	2.71251	0.199521	4.52	1.6768	0.676629
4.54	2.64518	0.513863	4.54	1.55097	0.700263
4.56	2.75041	0.596568	4.56	1.5879	0.828344
4.58	2.60349	0.515786	4.58	1.74101	0.984292
4.6	2.65237	0.583982	4.6	1.64692	0.732606
4.62	2.80296	0.230882	4.62	1.50668	0.570254
4.64	2.80648	0.487129	4.64	1.63152	0.778191
4.66	2.82977	0.35846	4.66	1.70294	0.95943
4.68	2.86488	0.232971	4.68	1.6843	0.912058
4.7	2.84203	0.528925	4.7	1.71481	0.782078
4.72	2.7988	0.452073	4.72	1.75189	0.905308
4.74	2.91874	0.34906	4.74	1.70604	0.864056
4.76	2.82385	0.883636	4.76	1.7017	0.789304
4.78	2.95504	0.541819	4.78	1.66711	0.885586
4.8	3.0011	0.515833	4.8	1.62774	0.74902
4.82	3.01532	0.611178	4.82	1.65197	0.527049
4.84	3.02861	0.638688	4.84	1.60106	0.64651
4.86	3.14362	0.611986	4.86	1.62115	0.842373
4.88	3.14467	0.533018	4.88	1.65471	0.868451
4.9	3.19393	0.530075	4.9	1.63725	0.80696
4.92	3.03613	0.803644	4.92	1.53453	0.746563
4.94	3.02777	0.73088	4.94	1.58617	0.777755
4.96	2.79375	0.860561	4.96	1.65425	0.917025
4.98	2.8796	0.803885	4.98	1.65705	0.665698
5	2.75775	0.563147	5	1.57202	0.617215
5.02	2.73437	0.513571	5.02	1.689	0.644177
5.04	2.74806	0.522018	5.04	1.62931	0.581908
5.06	2.76523	0.567806	5.06	1.72931	0.59587
5.08	2.73354	0.633376	5.08	1.81508	0.421287
5.1	2.73524	0.569888	5.1	1.80646	0.850956
5.12	2.57956	0.257747	5.12	1.71545	0.76583
5.14	2.69221	0.822532	5.14	1.67921	0.845715
5.16	2.59722	0.83382	5.16	1.72065	0.870661
5.18	2.5293	0.798723	5.18	1.65059	0.759441
5.2	2.58044	0.907901	5.2	1.6942	0.743204
5.22	2.57583	0.828667	5.22	1.64982	0.677725
5.24	2.6122	0.494482	5.24	1.73412	0.607032
5.26	2.62138	0.51236	5.26	1.62106	0.480555
5.28	2.71903	0.593449	5.28	1.68033	1.02942
5.3	2.65454	0.626943	5.3	1.72286	0.666487
5.32	2.70888	0.571954	5.32	1.81866	0.703935
5.34	2.70889	0.182869	5.34	1.69089	0.342963
5.36	2.8631	0.325889	5.36	1.64312	0.874896
5.38	2.77653	0.452765	5.38	1.67663	0.686154
5.4	2.72754	0.551495	5.4	1.70825	0.89109
5.42	2.91968	0.508912	5.42	1.70558	0.674112
5.44	3.04104	0.559415	5.44	1.70715	0.964817
5.46	2.96967	0.48584	5.46	1.73446	0.755848
5.48	2.96358	0.527613	5.48	1.74117	0.82903
5.5	2.95808	0.347779	5.5	1.70661	0.787129
5.52	2.92175	0.861619	5.52	1.77969	0.552845
5.54	2.95109	0.21694	5.54	1.85631	0.631275
5.56	2.97594	0.835311	5.56	1.83016	0.593965
5.58	2.9313	0.747743	5.58	1.62894	0.566844
5.6	2.90918	0.698005	5.6	1.69798	0.776809
5.62	2.92332	0.281466	5.62	1.71292	0.876532
5.64	2.89049	0.355744	5.64	1.61953	0.929918
5.66	2.76836	0.905334	5.66	1.5898	0.823239
5.68	2.81282	0.617661	5.68	1.59386	0.796878
5.7	2.83284	0.831516	5.7	1.68133	0.825099
5.72	2.89134	0.853189	5.72	1.58234	0.877507
5.74	2.89877	0.873017	5.74	1.62882	0.823133
5.76	2.95523	0.867435	5.76	1.67906	0.792559
5.78	2.99513	0.573935	5.78	1.75219	0.720075
5.8	2.97348	0.554621	5.8	1.68398	0.766052
5.82	3.06469	0.371416	5.82	1.75094	0.709207
5.84	3.09366	0.228065	5.84	1.69107	0.83253
5.86	3.14463	0.181031	5.86	1.76162	0.954754
5.88	3.07526	0.758675	5.88	1.71637	0.9674
5.9	3.10424	0.32103	5.9	1.75425	0.827775
5.92	3.15041	0.525007	5.92	1.70985	0.793993
5.94	3.07388	0.639145	5.94	1.66899	0.892594
5.96	3.09674	0.513475	5.96	1.6908	0.748809
5.98	3.05245	0.554147	5.98	1.78357	0.655508
6	3.10006	0.955314	6	1.79239	0.677093
6.02	2.97968	0.874832	6.02	1.86249	0.775208
6.04	3.02459	0.465068	6.04	1.70082	0.570008
6.06	3.04087	0.581608	6.06	1.73366	0.745696
6.08	3.12076	0.333032	6.08	1.77506	0.702945
6.1	2.98742	0.286657	6.1	1.67875	0.807545
6.12	3.0702	0.580179	6.12	1.72576	0.882187
6.14	3.0836	0.435746	6.14	1.74811	0.756904
6.16	3.06105	0.580133	6.16	1.68969	0.841724
6.18	3.03128	0.896907	6.18	1.66711	0.772596
6.2	3.01269	0.860302	6.2	1.76724	0.957396
6.22	3.06826	0.830636	6.22	1.70545	0.810258
6.24	3.16894	0.43254	6.24	1.68231	0.849729
6.26	3.04444	0.832305	6.26	1.7022	0.744808
6.28	3.06606	0.860778	6.28	1.66203	0.902827
6.3	3.03303	0.298217	6.3	1.74993	0.830658
6.32	3.0749	0.415242	6.32	1.66005	0.978209
6.34	3.08443	0.596155	6.34	1.67013	1.03131
6.36	3.09909	0.863991	6.36	1.63442	0.794197
6.38	3.0608	0.851413	6.38	1.64247	0.528443
6.4	3.16211	0.750593	6.4	1.6513	0.562016
6.42	3.03588	0.599329	6.42	1.62852	0.822005
6.44	3.03576	0.53034	6.44	1.78219	0.710454
6.46	2.99105	0.89827	6.46	1.76188	0.668905
6.48	3.00339	0.850275	6.48	1.78239	0.61832
6.5	2.95982	0.557166	6.5	1.76832	0.803861
6.52	2.93296	0.260801	6.52	1.78772	0.797158
6.54	2.90365	0.552813	6.54	1.64826	0.676563
6.56	2.72826	0.571652	6.56	1.78055	0.897748
6.58	2.81937	0.564233	6.58	1.93119	0.891538
6.6	2.88198	0.562164	6.6	1.81117	0.809253
6.62	2.97671	0.37116	6.62	1.73812	0.572503
6.64	2.93691	0.475724	6.64	1.8861	0.545999
6.66	2.92935	0.302953	6.66	1.88638	0.738919
6.68	2.97399	0.571481	6.68	1.74051	0.573482
6.7	3.00071	0.769505	6.7	1.71994	0.861143
6.72	2.98534	0.25763	6.72	1.76505	0.876916
6.74	2.89003	0.287068	6.74	1.71057	0.922731
6.76	2.86392	0.622535	6.76	1.73903	0.327857
6.78	2.92816	0.885007	6.78	1.76112	0.767232
6.8	2.84793	0.318382	6.8	1.77421	0.594824
6.82	2.95236	0.769183	6.82	1.68192	0.905373
6.84	2.9823	0.552482	6.84	1.70187	0.792549
6.86	2.91693	0.862297	6.86	1.66939	0.682361
6.88	2.95302	0.801736	6.88	1.76724	0.62726
6.9	2.81073	0.861821	6.9	1.71924	0.643651
6.92	2.88987	0.488491	6.92	1.75421	0.635987
6.94	2.79441	0.540007	6.94	1.73872	0.728515
6.96	2.91341	0.529875	6.96	1.64974	0.690173
6.98	2.87835	0.28415	6.98	1.78388	0.683458
7	2.89327	0.256452	7	1.61225	0.747882
7.02	2.87792	0.49649	7.02	1.64646	0.762309
7.04	2.85684	0.226345	7.04	1.71095	0.832142
7.06	2.90118	0.845029	7.06	1.72089	0.946578
7.08	2.9187	0.854898	7.08	1.75272	0.868576
7.1	2.85216	0.828862	7.1	1.70978	0.790107
7.12	2.86291	0.829085	7.12	1.79521	0.808594
7.14	2.87696	0.742236	7.14	1.86687	0.910974
7.16	2.88537	0.760762	7.16	1.79508	0.811146
7.18	2.8987	0.784168	7.18	1.75423	0.774282
7.2	2.89048	0.64485	7.2	1.71802	0.721204
7.22	2.90453	0.845292	7.22	1.67688	0.646865
7.24	2.91747	0.901059	7.24	1.79857	1.09388
7.26	2.91737	0.849537	7.26	1.7291	0.902606
7.28	2.85565	0.904515	7.28	1.69642	0.792833
7.3	2.84766	0.845625	7.3	1.6669	0.792073
7.32	2.92742	0.828054	7.32	1.77335	0.937053
7.34	2.89573	0.801854	7.34	1.75651	0.974098
7.36	2.98655	0.901074	7.36	1.78694	0.924665
7.38	2.99372	0.558369	7.38	1.78736	1.13237
7.4	2.99148	0.482494	7.4	1.81958	0.931158
7.42	2.93515	0.511261	7.42	1.73605	0.856745
7.44	2.90746	0.819871	7.44	1.72706	0.921286
7.46	3.02534	0.580332	7.46	1.72275	0.934877
7.48	2.95507	0.324134	7.48	1.84706	0.849506
7.5	2.94492	0.525789	7.5	1.82455	0.869409
7.52	2.96845	0.80783	7.52	1.79025	0.968461
7.54	2.90818	0.567244	7.54	1.83028	0.876905
7.56	2.93165	0.404684	7.56	1.81426	1.09834
7.58	2.88729	0.873764	7.58	1.84142	0.898056
7.6	2.94864	0.489581	7.6	1.84953	0.75924
7.62	2.90203	0.509796	7.62	1.85498	0.929733
7.64	2.87938	0.546206	7.64	1.87556	0.93864
7.66	2.9433	0.528903	7.66	1.76583	0.95161
7.68	2.96997	0.378692	7.68	1.7098	0.845828
7.7	2.95043	0.774428	7.7	1.80158	1.03053
7.72	2.97945	0.799198	7.72	1.73983	0.95426
7.74	2.88427	0.805993	7.74	1.77338	0.944582
7.76	2.95761	0.779626	7.76	1.76428	0.89176
7.78	2.93752	0.8583	7.78	1.74697	0.825308
7.8	2.95213	0.264488	7.8	1.79249	0.775664
7.82	3.01102	0.778359	7.82	1.77945	0.953933
7.84	2.854	0.881074	7.84	1.78956	0.861741
7.86	2.92294	0.559126	7.86	1.82722	0.815657
7.88	2.91997	0.345566	7.88	1.74183	0.747878
7.9	2.95371	0.641228	7.9	1.72698	0.811509
7.92	2.99605	0.546124	7.92	1.71403	0.995839
7.94	3.04672	0.539641	7.94	1.7457	0.983132
7.96	3.0347	0.535432	7.96	1.7686	0.883554
7.98	2.96901	0.587505	7.98	1.74271	0.758836
8	2.94896	0.755332	8	1.75005	0.859121
8.02	2.83596	0.837129	8.02	1.78988	0.776208
8.04	2.86864	0.84901	8.04	1.72627	0.842381
8.06	2.81015	0.849768	8.06	1.7531	0.867847
8.08	2.80898	0.884138	8.08	1.73723	0.914505
8.1	2.6835	0.867912	8.1	1.87797	0.765944
8.12	2.71698	0.874919	8.12	1.79138	0.662554
8.14	2.73329	0.703325	8.14	1.79318	0.915974
8.16	2.69338	0.51367	8.16	1.7921	1.03956
8.18	2.86982	0.537719	8.18	1.77601	0.991841
8.2	2.76162	0.557008	8.2	1.82518	0.770777
8.22	2.71791	0.397191	8.22	1.7821	0.734312
8.24	2.84837	0.815882	8.24	1.77535	0.710461
8.26	2.80293	0.771943	8.26	1.74778	1.04193
8.28	2.73377	0.909191	8.28	1.80104	0.852108
8.3	2.74586	0.927607	8.3	1.75986	0.929496
8.32	2.82185	0.436376	8.32	1.88374	0.88343
8.34	2.92177	0.452733	8.34	1.7531	0.825512
8.36	2.96181	0.835212	8.36	1.79426	0.901304
8.38	3.04389	0.849713	8.38	1.78112	0.825042
8.4	2.98051	0.294145	8.4	1.80022	1.01885
8.42	2.92191	0.895972	8.42	1.83747	1.02841
8.44	2.96295	0.903827	8.44	1.88838	0.959458
8.46	3.01797	0.836546	8.46	1.7717	0.928413
8.48	2.89235	0.91746	8.48	1.72822	0.815282
8.5	2.85735	0.869403	8.5	1.68072	0.912051
8.52	2.92895	0.550571	8.52	1.86818	0.893994
8.54	2.92803	0.323701	8.54	1.79199	0.798376
8.56	2.93699	0.870073	8.56	1.92852	1.20198
8.58	2.97379	0.779155	8.58	1.89948	0.981735
8.6	2.83696	0.324223	8.6	1.86263	0.903269
8.62	2.86735	0.563424	8.62	1.95413	0.820891
8.64	2.99833	0.265753	8.64	1.85057	0.936346
8.66	2.93726	0.597762	8.66	1.86126	0.905372
8.68	2.80478	0.639105	8.68	1.84437	0.880066
8.7	2.81917	0.551785	8.7	1.82633	0.912582
8.72	2.7967	0.897631	8.72	1.78582	0.743026
8.74	2.68927	0.918653	8.74	1.88375	0.852855
8.76	2.81358	0.837134	8.76	1.83336	0.957971
8.78	2.77643	0.866539	8.78	1.8375	0.884114
8.8	2.66905	0.886525	8.8	1.84564	1.01669
8.82	2.62092	0.585086	8.82	1.77603	0.926656
8.84	2.63217	0.262584	8.84	1.75612	0.919433
8.86	2.64085	0.562589	8.86	1.89292	0.953507
8.88	2.58277	0.803467	8.88	1.85212	0.914329
8.9	2.75987	0.880479	8.9	1.89495	0.816761
8.92	2.71558	0.807103	8.92	1.84313	0.963207
8.94	2.69882	0.766727	8.94	1.80462	1.01532
8.96	2.77529	0.851066	8.96	1.80769	1.02425
8.98	2.7481	0.833859	8.98	1.76333	1.03568
9	2.65364	0.950908	9	1.7774	0.94428
9.02	2.74515	0.859903	9.02	1.86762	0.998213
9.04	2.71631	0.56473	9.04	1.7743	1.04515
9.06	2.77402	0.499784	9.06	1.82072	0.958046
9.08	2.83688	0.57876	9.08	1.85928	0.987878
9.1	2.62834	0.588829	9.1	1.81256	1.00408
9.12	2.68618	0.502353	9.12	1.818	1.00472
9.14	2.55592	0.535122	9.14	1.72949	1.11336
9.16	2.54793	0.229074	9.16	1.80226	1.10268
9.18	2.65369	0.366584	9.18	1.73947	1.01299
9.2	2.68711	0.296981	9.2	1.79884	0.942196
9.22	2.67696	0.580886	9.22	1.77545	1.01076
9.24	2.69718	0.254954	9.24	1.69249	0.812644
9.26	2.79723	0.54671	9.26	1.74674	0.879715
9.28	2.81951	0.526789	9.28	1.77769	0.787999
9.3	2.77858	0.526393	9.3	1.83847	0.622593
9.32	2.69245	0.360749	9.32	1.86618	0.728848
9.34	2.68982	0.953569	9.34	1.7725	0.986194
9.36	2.68746	0.861659	9.36	1.83531	0.998543
9.38	2.69434	0.85742	9.38	1.78266	0.96107
9.4	2.75951	1.01784	9.4	1.72847	0.976179
9.42	2.66974	0.868425	9.42	1.61812	0.943212
9.44	2.67857	0.815284	9.44	1.69417	0.879289
9.46	2.66519	0.85171	9.46	1.81601	0.905212
9.48	2.63343	0.844428	9.48	1.85852	0.978416
9.5	2.58132	0.831537	9.5	1.82602	0.897461
9.52	2.69794	0.909411	9.52	1.84625	0.859011
9.54	2.62972	0.834794	9.54	1.86055	0.885539
9.56	2.53186	0.329969	9.56	1.73946	0.897114
9.58	2.6254	0.292789	9.58	1.87074	1.02612
9.6	2.61452	0.826661	9.6	1.96727	0.921482
9.62	2.60608	0.851502	9.62	1.84875	0.88944
9.64	2.70376	0.879054	9.64	1.85054	0.86017
9.66	2.67379	0.883083	9.66	1.84986	0.999299
9.68	2.79151	0.810703	9.68	1.79699	0.950579
9.7	2.68534	0.617223	9.7	1.86099	0.896184
9.72	2.73023	0.595672	9.72	1.84479	0.926275
9.74	2.73513	0.52756	9.74	1.80723	0.884368
9.76	2.73562	0.299019	9.76	1.83034	0.846347
9.78	2.76394	0.654516	9.78	1.85629	0.837395
9.8	2.80656	0.579123	9.8	1.85224	0.948501
9.82	2.66521	0.543106	9.82	1.87783	0.888119
9.84	2.69261	0.831411	9.84	1.89892	0.92506
9.86	2.65987	0.794199	9.86	1.83871	0.948374
9.88	2.67638	0.872384	9.88	1.69709	0.87033
9.9	2.77868	0.937632	9.9	1.8386	0.878133
9.92	2.79968	0.807249	9.92	1.93178	0.899074
9.94	2.6654	0.261717	9.94	1.87883	0.948769
9.96	2.71931	0.551427	9.96	1.80962	1.01231
9.98	2.66753	0.840505	9.98	1.87302	0.857684
10	2.58979	0.583318	10	1.87689	0.721442
10.02	2.65684	0.869635	10.02	1.91038	1.08076
10.04	2.78369	0.815157	10.04	1.91754	1.03056
10.06	2.75469	0.889022	10.06	1.9651	1.05399
10.08	2.77662	0.587832	10.08	1.84226	0.970219
10.1	2.6506	0.524425	10.1	2.01003	0.963199
10.12	2.63382	0.222899	10.12	1.94402	0.939432
10.14	2.63151	0.502493	10.14	1.93427	0.878336
10.16	2.55259	0.665888	10.16	1.98959	0.939591
10.18	2.44224	0.51152	10.18	2.01036	0.956951
10.2	2.46669	0.537763	10.2	1.89546	1.04628
10.22	2.56975	0.651514	10.22	1.92908	0.811241
10.24	2.53765	0.524306	10.24	1.88956	0.897697
10.26	2.51466	0.525536	10.26	1.94824	0.891006
10.28	2.5614	0.334433	10.28	1.96219	0.86573
10.3	2.6545	0.420256	10.3	1.92472	0.899664
10.32	2.60543	0.492204	10.32	2.15821	0.886132
10.34	2.65692	0.919225	10.34	2.0234	0.81301
10.36	2.57646	0.79781	10.36	2.04609	0.9727
10.38	2.60978	0.59694	10.38	2.06012	0.816849
10.4	2.71135	0.854012	10.4	2.07478	1.04543
10.42	2.71757	0.262594	10.42	2.0775	1.03313
10.44	2.63864	0.529226	10.44	2.15271	0.98813
10.46	2.72511	0.204554	10.46	2.1272	0.958311
10.48	2.75556	0.330425	10.48	2.14877	0.865891
10.5	2.79166	0.393517	10.5	1.99906	0.832968
10.52	2.76751	0.27255	10.52	2.05263	0.912292
10.54	2.74848	0.601874	10.54	2.13068	0.947264
10.56	2.83721	0.358904	10.56	2.0781	1.00339
10.58	2.8265	0.597621	10.58	2.03039	0.959074
10.6	2.77379	0.287325	10.6	2.02366	0.782305
10.62	2.80938	0.594608	10.62	2.04482	0.789436
10.64	2.78997	0.497529	10.64	2.12053	0.804781
10.66	2.70669	0.554555	10.66	2.05002	0.910944
10.68	2.89769	0.33223	10.68	2.00931	1.0511
10.7	2.79854	0.529172	10.7	2.05628	1.0244
10.72	2.85246	0.294677	10.72	1.995	0.857892
10.74	2.89179	0.531412	10.74	2.03039	0.807655
10.76	2.84108	0.850234	10.76	1.96161	0.942814
10.78	2.86927	0.859374	10.78	2.07427	1.0065
10.8	2.84846	0.732063	10.8	1.99609	0.903719
10.82	2.92254	0.803331	10.82	1.96739	0.990742
10.84	2.84897	0.844533	10.84	1.94181	0.900581
10.86	2.81575	0.860633	10.86	1.91701	0.947427
10.88	2.83277	0.582376	10.88	1.96961	0.93669
10.9	2.79887	0.480484	10.9	1.94629	0.977595
10.92	2.80572	0.497854	10.92	2.03713	0.883297
10.94	2.87479	0.552237	10.94	1.99979	0.919429
10.96	2.8135	0.214391	10.96	2.04427	0.723895
10.98	2.89312	0.380703	10.98	2.03227	0.902062
11	2.85076	0.578591	11	1.93826	0.854102
11.02	2.83599	0.685193	11.02	2.05704	0.678834
11.04	2.82035	0.841846	11.04	2.03355	0.994465
11.06	2.75162	0.826396	11.06	1.99612	0.85004
11.08	2.69774	0.528522	11.08	2.03289	0.875739
11.1	2.72915	0.493521	11.1	1.99151	0.948121
11.12	2.75661	0.481074	11.12	1.9901	0.891478
11.14	2.70112	0.565749	11.14	2.035	0.972556
11.16	2.71937	0.565634	11.16	1.9201	0.963546
11.18	2.78313	0.582128	11.18	1.882	0.954576
11.2	2.74002	0.55957	11.2	1.97133	0.740973
11.22	2.76908	0.641373	11.22	2.00524	0.920486
11.24	2.68265	0.290628	11.24	1.9096	0.958614
11.26	2.68555	0.871465	11.26	1.89571	0.927252
11.28	2.71072	0.933251	11.28	2.06302	0.86782
11.3	2.67619	0.913617	11.3	1.97308	0.935773
11.32	2.67464	0.71138	11.32	1.94299	0.9028
11.34	2.66857	0.566749	11.34	2.00737	0.827683
11.36	2.64239	0.595193	11.36	2.05228	0.886773
11.38	2.78227	0.563784	11.38	1.92151	0.773092
11.4	2.69932	0.29796	11.4	2.07787	0.903124
11.42	2.76372	0.291301	11.42	1.96534	0.910048
11.44	2.78094	0.907984	11.44	2.00983	0.904332
11.46	2.74833	0.874692	11.46	1.96998	0.780356
11.48	2.70284	0.614319	11.48	1.84469	0.887272
11.5	2.6934	0.522575	11.5	1.89616	0.96986
11.52	2.72978	0.842704	11.52	1.90726	0.94144
11.54	2.78869	0.873855	11.54	1.96588	0.895952
11.56	2.79934	0.805331	11.56	1.97512	0.967829
11.58	2.7897	0.849994	11.58	1.93165	0.884125
11.6	2.87594	0.884449	11.6	1.93186	0.97426
11.62	2.8796	0.863694	11.62	2.01857	0.815771
11.64	2.81526	0.854722	11.64	1.91314	0.759285
11.66	2.82112	0.834232	11.66	1.91407	0.760088
11.68	2.88363	0.552544	11.68	1.88472	0.882843
11.7	2.81863	0.593611	11.7	1.8082	0.756381
11.72	2.8937	0.894165	11.72	1.79414	0.874252
11.74	2.75749	0.857495	11.74	1.80529	0.919809
11.76	2.77723	0.847632	11.76	1.843	0.859828
11.78	2.82591	0.632093	11.78	1.76691	0.964893
11.8	2.889	0.822008	11.8	1.8177	0.941569
11.82	2.84405	0.839554	11.82	1.68709	0.984388
11.84	2.86802	0.472666	11.84	1.82016	1.02582
11.86	2.91337	0.60454	11.86	1.82318	0.865297
11.88	2.98103	0.22089	11.88	1.83376	0.743872
11.9	2.93129	0.866926	11.9	1.81329	1.04093
11.92	2.98437	0.852888	11.92	1.83481	1.03169
11.94	3.02516	0.920443	11.94	1.77156	0.859698
11.96	2.92899	0.510307	11.96	1.74704	0.786733
11.98	2.87709	0.531336	11.98	1.71389	1.00595
12	2.90319	0.606442	12	1.67238	0.832233
12.02	2.91318	0.849272	12.02	1.86016	0.681439
12.04	2.99325	0.911669	12.04	1.8489	0.861774
12.06	2.97459	0.486698	12.06	1.87448	1.1273
12.08	2.88312	0.56797	12.08	1.9654	0.981316
12.1	2.95697	0.907376	12.1	1.92071	0.875181
12.12	2.93744	0.367393	12.12	1.91439	1.03541
12.14	2.955	0.458164	12.14	1.83549	0.969916
12.16	2.89531	0.540661	12.16	1.83973	0.809095
12.18	2.89823	0.380231	12.18	1.90334	0.920862
12.2	2.98618	0.215014	12.2	1.89875	0.833834
12.22	2.9565	0.809977	12.22	1.94789	0.875638
12.24	3.01032	0.828527	12.24	1.89024	0.894449
12.26	2.89419	0.535522	12.26	1.82947	1.00533
12.28	2.98369	0.875081	12.28	1.94224	0.892719
12.3	2.91874	0.809624	12.3	1.92445	0.947192
12.32	2.95242	0.763364	12.32	1.92137	0.90694
12.34	2.9266	0.851781	12.34	1.75712	0.816213
12.36	2.93662	0.872044	12.36	1.86062	1.0225
12.38	2.98592	0.835368	12.38	1.94773	0.748602
12.4	2.96093	0.780639	12.4	1.8815	0.984806
12.42	2.82805	0.851788	12.42	1.93922	0.900454
12.44	2.89682	0.834173	12.44	1.90858	0.941353
12.46	2.84782	0.883262	12.46	1.90725	0.934401
12.48	2.85805	0.841329	12.48	1.9871	0.826181
12.5	2.95625	0.790697	12.5	2.00682	0.860178
12.52	2.86278	0.840178	12.52	1.94689	1.03903
12.54	2.78927	0.85096	12.54	1.9136	0.915401
12.56	2.90416	0.874155	12.56	1.86422	0.983081
12.58	2.82121	0.254942	12.58	1.85778	0.848873
12.6	2.97524	0.600887	12.6	1.94555	1.06382
12.62	2.85035	0.314658	12.62	1.97554	0.872659
12.64	2.91958	0.245367	12.64	1.88502	0.890409
12.66	2.90216	0.258064	12.66	1.8866	0.922292
12.68	2.86166	0.833297	12.68	2.07636	1.00127
12.7	3.01113	0.862434	12.7	2.05669	0.945151
12.72	2.90659	0.813948	12.72	2.02695	0.823462
12.74	2.95715	0.572696	12.74	1.86794	0.847568
12.76	2.95998	0.583402	12.76	1.90092	0.869295
12.78	2.93936	0.51453	12.78	1.93309	0.847073
12.8	2.94919	0.373741	12.8	1.90054	0.942953
12.82	2.96949	0.74391	12.82	1.89683	0.986954
12.84	3.01185	0.532559	12.84	1.97417	0.985271
12.86	2.98545	0.237142	12.86	1.94726	0.902074
12.88	2.97628	0.561875	12.88	1.98053	0.930188
12.9	2.97758	0.507606	12.9	1.92677	0.953835
12.92	2.98626	0.529307	12.92	1.93726	0.935981
12.94	3.03495	0.904669	12.94	1.92202	0.902751
12.96	2.96262	0.492092	12.96	1.83006	0.898138
12.98	3.00164	0.878841	12.98	1.80178	0.944533
13	2.89732	0.859028	13	1.92902	0.930365
13.02	2.92977	0.855046	13.02	1.8898	0.803943
13.04	2.89413	0.542994	13.04	1.92815	0.818575
13.06	3.00943	0.503648	13.06	1.82684	0.774723
13.08	2.9846	0.571819	13.08	1.83016	0.847933
13.1	3.07881	0.616806	13.1	1.92025	0.723481
13.12	3.06787	0.873956	13.12	1.82571	0.944305
13.14	2.99223	0.829905	13.14	1.88204	0.848685
13.16	3.05165	0.818042	13.16	1.89547	0.990146
13.18	3.00977	0.579245	13.18	1.96219	0.947029
13.2	3.0509	0.814302	13.2	2.0978	0.954832
13.22	2.9762	0.899801	13.22	1.91353	0.969445
13.24	3.00538	0.889781	13.24	1.92874	0.924483
13.26	2.97011	0.813698	13.26	2.04602	1.00591
13.28	2.94616	0.837206	13.28	2.04157	0.964065
13.3	2.94863	0.586773	13.3	1.93161	0.931397
13.32	3.05452	0.927215	13.32	1.94269	0.943428
13.34	3.11986	0.46816	13.34	1.92569	1.02305
13.36	3.01571	0.530814	13.36	1.77318	0.946033
13.38	3.02022	0.943596	13.38	1.89743	0.995111
13.4	3.02773	0.88853	13.4	1.86814	1.06557
13.42	3.05119	0.800312	13.42	1.92419	0.949816
13.44	3.06394	0.878016	13.44	1.91244	1.01533
13.46	3.1158	0.927587	13.46	1.82288	0.914106
13.48	3.12195	0.835558	13.48	1.81248	1.10335
13.5	3.07799	0.482235	13.5	1.98218	1.01114
13.52	3.02548	0.345945	13.52	1.88212	0.993689
13.54	3.13536	0.599109	13.54	1.88501	0.890413
13.56	3.07739	0.570635	13.56	1.854	1.00804
13.58	3.02829	0.506659	13.58	1.80431	1.02663
13.6	3.03423	0.243511	13.6	1.89238	1.05605
13.62	3.09446	0.633834	13.62	1.84313	1.03407
13.64	3.0246	0.505629	13.64	1.81372	1.00735
13.66	3.05636	0.571966	13.66	1.86368	1.04354
13.68	3.07249	0.570836	13.68	1.87824	0.948642
13.7	3.0751	0.371194	13.7	1.89426	0.891829
13.72	3.05922	0.322994	13.72	1.89122	0.889118
13.74	3.08915	0.239232	13.74	1.81706	0.950957
13.76	3.05873	0.282231	13.76	1.87979	0.883043
13.78	3.06128	0.550467	13.78	1.89424	0.902847
13.8	3.08209	0.316079	13.8	1.96294	1.07828
13.82	3.11951	0.662749	13.82	1.77734	0.875959
13.84	3.09627	0.689358	13.84	1.88345	0.893947
13.86	3.13541	0.797073	13.86	1.88398	0.944503
13.88	3.09035	0.85012	13.88	1.93969	0.880917
13.9	2.98933	0.760355	13.9	1.94537	0.894004
13.92	2.9919	0.287123	13.92	1.91785	1.00588
13.94	3.09666	0.5632	13.94	1.85061	0.98466
13.96	3.01684	0.887674	13.96	2.04316	0.929524
13.98	3.07329	0.867937	13.98	2.04563	0.819898
14	3.01043	0.830893	14	1.88876	0.858801
14.02	3.1078	0.87338	14.02	1.91767	0.938043
14.04	2.97352	0.237139	14.04	1.89534	0.925104
14.06	3.04145	0.830997	14.06	1.80595	0.974249
14.08	3.06626	0.89619	14.08	1.91449	0.861433
14.1	3.04088	0.888463	14.1	1.84335	0.970426
14.12	2.93912	0.875477	14.12	1.92792	0.876858
14.14	2.99442	0.558101	14.14	1.88869	0.828281
14.16	2.89314	0.826403	14.16	1.79901	0.824759
14.18	3.01042	0.942358	14.18	1.8897	0.826666
14.2	3.03269	0.844354	14.2	1.8719	0.938585
14.22	2.94338	0.74196	14.22	1.99025	0.938303
14.24	2.89648	0.507091	14.24	1.97082	1.02304
14.26	2.92427	0.898116	14.26	1.99272	1.02393
14.28	2.85291	0.852662	14.28	1.86655	1.05101
14.3	2.85144	0.60188	14.3	1.83911	1.08464
14.32	2.95865	0.864359	14.32	1.88854	0.981706
14.34	2.87039	0.828376	14.34	1.8985	0.948013
14.36	2.91033	0.678913	14.36	1.88987	1.07279
14.38	2.87732	0.546821	14.38	1.95225	1.01896
14.4	2.88076	0.320602	14.4	1.99983	0.952643
14.42	2.99868	0.268041	14.42	1.8837	0.971395
14.44	3.02871	0.394807	14.44	1.88201	0.862021
14.46	2.9692	0.309795	14.46	1.84203	1.01802
14.48	3.04251	0.303492	14.48	1.95559	0.924407
14.5	2.98052	0.392693	14.5	1.93553	0.930684
14.52	2.96012	0.273093	14.52	1.85587	0.97349
14.54	2.90346	0.310604	14.54	1.94265	0.876008
14.56	2.87652	0.457437	14.56	1.95872	0.960632
14.58	2.78383	0.588786	14.58	1.88862	0.91973
14.6	2.85404	0.302904	14.6	1.90645	0.936457
14.62	2.90568	0.478746	14.62	1.80391	0.952501
14.64	3.04179	0.536614	14.64	1.88681	0.956196
14.66	2.97204	0.87717	14.66	1.9364	1.06682
14.68	3.00193	0.77764	14.68	1.89503	0.853659
14.7	3.03957	0.895541	14.7	1.95898	0.938748
14.72	2.9175	0.839247	14.72	1.98227	0.880814
14.74	3.06093	0.894018	14.74	1.89549	0.936436
14.76	3.0406	0.243393	14.76	1.90319	0.96158
14.78	3.00664	0.653152	14.78	2.08489	0.990921
14.8	3.05825	0.877585	14.8	1.90475	0.955722
14.82	3.08443	0.818728	14.82	1.99468	1.02846
14.84	3.03755	0.850567	14.84	1.94101	1.06311
14.86	3.00183	0.906167	14.86	2.02391	1.02424
14.88	2.99195	0.889773	14.88	2.12467	1.04069
14.9	3.02512	0.831051	14.9	2.13271	0.959744
14.92	3.02894	0.556681	14.92	2.1677	0.92256
14.94	3.06559	0.575517	14.94	2.1558	0.926786
14.96	3.00392	0.850105	14.96	2.1115	0.915566
14.98	2.97222	0.86558	14.98	2.16843	0.94748
15	3.00281	0.850023	15	2.16188	0.975427
15.02	3.05273	0.921798	15.02	2.11205	0.905931
15.04	2.99864	0.795572	15.04	2.02893	0.949103
15.06	3.0268	0.703399	15.06	2.0765	0.816726
15.08	3.08226	0.26337	15.08	2.11336	0.944448
15.1	2.96666	0.842994	15.1	2.17328	0.773958
15.12	3.03329	0.883232	15.12	2.1045	0.907207
15.14	3.07161	0.849281	15.14	2.02156	0.91776
15.16	3.10663	0.599282	15.16	1.91788	0.843524
15.18	3.23223	0.266053	15.18	1.99887	0.881587
15.2	3.09141	0.239615	15.2	2.05157	0.768412
15.22	3.06235	0.821065	15.22	2.04628	0.867956
15.24	3.02283	0.94062	15.24	2.01027	0.916611
15.26	2.98102	0.909805	15.26	2.20667	0.973515
15.28	2.98808	0.965746	15.28	2.24685	0.838963
15.3	3.01089	0.851928	15.3	2.19937	0.883822
15.32	2.94843	0.840186	15.32	2.26096	0.805632
15.34	2.96246	0.84844	15.34	2.17612	0.849213
15.36	3.02764	0.556355	15.36	2.16767	0.78788
15.38	3.04064	0.532032	15.38	2.02008	0.883141
15.4	3.03655	0.538897	15.4	2.08383	0.794459
15.42	3.07566	0.931622	15.42	2.05883	0.893788
15.44	3.09463	0.886367	15.44	2.07897	0.996294
15.46	3.11757	0.477493	15.46	2.17178	0.986809
15.48	3.07302	0.836332	15.48	2.03538	0.677514
15.5	3.04276	0.278703	15.5	1.98003	0.816068
15.52	3.01334	0.287715	15.52	2.08336	0.739164
15.54	3.01901	0.585235	15.54	2.13582	0.871209
15.56	3.02817	0.575164	15.56	2.15441	0.866339
15.58	3.02412	0.502982	15.58	2.05565	0.778399
15.6	3.0832	0.46758	15.6	2.17886	0.830514
15.62	3.18098	0.647663	15.62	2.21661	0.841406
15.64	3.08893	0.845578	15.64	2.10117	0.892473
15.66	3.04801	0.335736	15.66	2.09751	0.866275
15.68	3.14457	0.304546	15.68	2.02272	0.944084
15.7	3.03943	0.515182	15.7	1.92696	0.959794
15.72	3.09264	0.429757	15.72	1.94883	0.925262
15.74	3.14508	0.916548	15.74	1.85519	0.785855
15.76	3.13775	0.669328	15.76	1.85492	0.721316
15.78	3.07085	0.541198	15.78	2.01625	0.891338
15.8	3.04519	0.875132	15.8	1.91481	0.931014
15.82	3.06584	0.778237	15.82	1.97349	0.830195
15.84	3.0735	0.458799	15.84	2.05409	0.899233
15.86	3.1196	0.850689	15.86	2.06383	1.03033
15.88	3.09553	0.784287	15.88	2.06353	1.01964
15.9	3.06983	0.813967	15.9	2.05025	0.990775
15.92	3.07334	0.858332	15.92	2.01085	0.990215
15.94	3.10014	0.884575	15.94	2.07227	0.992917
15.96	3.09877	0.507987	15.96	2.01374	0.871574
15.98	2.92358	0.840641	15.98	2.19401	0.946445
16	2.90529	0.502784	16	2.0377	0.940377
16.02	3.01395	0.765966	16.02	2.13498	0.911204
16.04	3.11986	0.524882	16.04	2.05599	0.955835
16.06	3.15775	0.469155	16.06	2.08084	0.904895
16.08	3.09101	0.81236	16.08	2.03162	0.892404
16.1	3.15898	0.833245	16.1	1.95274	1.01464
16.12	3.16111	0.863715	16.12	2.00439	0.853579
16.14	3.14166	0.848078	16.14	1.8908	0.987661
16.16	3.12855	0.834218	16.16	2.02022	0.983095
16.18	3.05788	0.836851	16.18	2.07523	0.940467
16.2	3.12002	0.744317	16.2	2.01448	1.03435
16.22	3.15043	0.848303	16.22	2.0086	0.957072
16.24	3.13045	0.56192	16.24	2.02639	0.839516
16.26	3.06007	0.854807	16.26	1.95841	0.901187
16.28	3.08664	0.402131	16.28	2.11516	0.839634
16.3	3.04361	0.232145	16.3	2.04407	0.875329
16.32	3.02811	0.937585	16.32	2.03286	0.795203
16.34	2.94585	0.558288	16.34	2.00273	0.944305
16.36	3.09656	0.504373	16.36	2.10818	0.789617
16.38	3.05959	0.618968	16.38	2.06548	0.834411
16.4	3.19383	0.80043	16.4	1.94449	0.87748
16.42	3.14541	0.835095	16.42	2.07285	0.810307
16.44	3.21506	0.53193	16.44	1.95209	0.84661
16.46	3.19174	0.621617	16.46	1.99747	0.849649
16.48	3.14204	0.554558	16.48	1.97639	0.863044
16.5	3.10105	0.876604	16.5	1.95696	0.936766
16.52	3.22262	0.865432	16.52	2.05308	0.862537
16.54	3.25503	0.549454	16.54	2.09471	0.740016
16.56	3.24741	0.898046	16.56	2.03853	0.862822
16.58	3.25607	0.92834	16.58	2.08098	0.876764
16.6	3.17534	0.896521	16.6	1.90074	0.948294
16.62	3.22094	0.840541	16.62	2.01162	0.859231
16.64	3.22132	0.893972	16.64	1.9463	0.874512
16.66	3.32708	0.85963	16.66	1.91092	0.908401
16.68	3.3724	0.910388	16.68	1.98247	0.919319
16.7	3.2233	0.829692	16.7	2.0388	1.00266
16.72	3.10109	0.819987	16.72	1.88089	0.859481
16.74	3.18277	0.80459	16.74	1.88485	0.952322
16.76	3.1562	0.920571	16.76	1.97589	0.885831
16.78	3.22411	0.809196	16.78	1.89748	0.906852
16.8	3.15549	0.863252	16.8	1.94667	0.981522
16.82	3.22739	0.827632	16.82	1.91945	0.87077
16.84	3.27388	0.829213	16.84	2.01047	0.783821
16.86	3.14582	0.900574	16.86	1.95638	1.04696
16.88	3.18795	0.655023	16.88	1.89833	0.961297
16.9	3.21182	0.567686	16.9	1.89414	1.01106
16.92	3.21787	0.866975	16.92	1.95253	0.960103
16.94	3.16005	0.876526	16.94	1.86764	1.10564
16.96	3.19738	0.776271	16.96	1.98142	0.931707
16.98	3.14646	0.510545	16.98	1.93669	1.06035
17	3.25151	0.395502	17	1.91151	0.774845
17.02	3.17166	0.880438	17.02	1.94694	1.10559
17.04	3.13535	0.885608	17.04	2.01976	1.08566
17.06	3.14444	0.552445	17.06	1.89093	0.939211
17.08	3.22162	0.563622	17.08	1.9046	0.834425
17.1	3.14847	0.564654	17.1	1.92889	0.843745
17.12	3.20094	0.620179	17.12	2.02083	0.989098
17.14	3.13495	0.506349	17.14	1.9684	0.996797
17.16	3.10817	0.541275	17.16	1.97932	0.929948
17.18	3.18494	0.460842	17.18	2.01883	0.77569
17.2	3.14009	0.844464	17.2	1.99266	0.761094
17.22	3.14991	0.519996	17.22	1.90065	0.9278
17.24	3.13684	0.829464	17.24	1.94981	0.828878
17.26	3.22701	0.835611	17.26	1.87569	0.872687
17.28	3.21777	0.840409	17.28	1.94352	0.798256
17.3	3.20778	0.88251	17.3	1.95637	1.04421
17.32	3.23253	0.843698	17.32	1.91072	0.955262
17.34	3.18026	0.851282	17.34	1.99598	0.866355
17.36	3.17803	0.336218	17.36	1.95447	0.812678
17.38	3.3198	0.274582	17.38	1.79616	0.939338
17.4	3.2894	0.530079	17.4	1.91127	0.849273
17.42	3.28269	0.539236	17.42	2.03028	0.699781
17.44	3.22659	0.636688	17.44	1.92817	0.924861
17.46	3.22908	0.48692	17.46	1.95118	0.849466
17.48	3.15723	0.575916	17.48	2.0157	0.896271
17.5	3.17655	0.863685	17.5	1.86683	0.941671
17.52	3.22703	0.579928	17.52	1.92474	0.875122
17.54	3.1756	0.563998	17.54	2.00918	0.932152
17.56	3.19854	0.941526	17.56	2.02668	0.871199
17.58	3.20522	0.99473	17.58	1.93167	0.898238
17.6	3.1437	0.952028	17.6	1.9556	0.883284
17.62	3.19969	0.890938	17.62	1.81206	0.983623
17.64	3.12481	0.800549	17.64	1.94161	0.911292
17.66	3.1951	0.517737	17.66	2.02395	0.77645
17.68	3.19179	0.294678	17.68	1.95118	0.756649
17.7	3.21932	0.546646	17.7	1.92273	0.89438
17.72	3.14304	0.568939	17.72	1.95969	0.845552
17.74	3.19135	0.41634	17.74	1.93978	0.81235
17.76	3.1882	0.603026	17.76	1.84195	0.861209
17.78	3.16921	0.925109	17.78	2.01464	0.948539
17.8	3.14982	0.877155	17.8	2.05468	0.701786
17.82	3.15643	0.844327	17.82	1.9691	0.889635
17.84	3.2902	0.81858	17.84	1.93032	0.92523
17.86	3.23411	0.803027	17.86	1.87191	0.84077
17.88	3.23282	0.907146	17.88	1.77081	0.866238
17.9	3.34775	0.85365	17.9	1.86797	0.782222
17.92	3.20574	0.829884	17.92	1.93691	0.898737
17.94	3.20488	0.59844	17.94	1.91784	0.996787
17.96	3.13548	0.453719	17.96	1.92422	0.921397
17.98	3.18958	0.833928	17.98	1.97085	0.935448
18	3.27997	0.293741	18	1.98337	0.898346
18.02	3.22177	0.476768	18.02	1.93701	0.874354
18.04	3.15526	0.580887	18.04	1.93822	0.849466
18.06	3.0313	0.896013	18.06	1.97491	0.858017
18.08	3.1406	0.87494	18.08	1.96328	1.08196
18.1	3.07298	0.86287	18.1	1.95115	0.974905
18.12	3.11667	0.906145	18.12	2.04892	0.814517
18.14	3.29132	0.890658	18.14	2.02434	0.806686
18.16	3.18104	0.906801	18.16	2.00774	0.906822
18.18	3.22967	0.727397	18.18	2.06707	0.86006
18.2	3.25281	0.758751	18.2	2.01467	0.90854
18.22	3.24994	0.606861	18.22	1.93335	0.944386
18.24	3.22563	0.845179	18.24	1.90884	0.946232
18.26	3.22888	0.542365	18.26	1.97597	0.993761
18.28	3.34215	0.28419	18.28	2.02026	0.926047
18.3	3.23902	0.196333	18.3	2.01327	0.846165
18.32	3.22242	0.388016	18.32	1.96943	0.877252
18.34	3.21707	0.508521	18.34	2.02765	0.903702
18.36	3.16001	0.604572	18.36	2.14021	0.807436
18.38	3.103	0.544953	18.38	2.1284	0.983112
18.4	3.05952	0.552909	18.4	2.04088	0.91524
18.42	3.12989	0.524365	18.42	2.09216	0.954241
18.44	3.24727	0.871215	18.44	1.93795	0.995964
18.46	3.17278	0.902864	18.46	1.96466	0.945894
18.48	3.21724	0.824433	18.48	1.98939	1.03995
18.5	3.199	0.571154	18.5	1.91297	0.853832
18.52	3.25994	0.629117	18.52	2.0419	0.871639
18.54	3.3348	0.502577	18.54	1.96655	0.947558
18.56	3.20213	0.525991	18.56	1.94581	0.756294
18.58	3.19375	0.516097	18.58	1.92117	0.878414
18.6	3.22102	0.339728	18.6	2.03882	0.949849
18.62	3.23093	0.833867	18.62	2.00619	0.912005
18.64	3.22349	0.517624	18.64	1.94867	0.97725
18.66	3.23442	0.524444	18.66	1.93169	1.0123
18.68	3.25701	0.494688	18.68	2.00392	0.760329
18.7	3.16458	0.502158	18.7	1.99105	0.855359
18.72	3.14107	0.575679	18.72	2.02142	0.803658
18.74	3.10186	0.545549	18.74	1.86928	0.788162
18.76	3.06825	0.620254	18.76	2.04211	0.769772
18.78	3.15435	0.26734	18.78	2.02904	0.83325
18.8	3.16835	0.547104	18.8	1.98406	0.794789
18.82	3.34405	0.828781	18.82	1.90305	0.850372
18.84	3.22834	0.851039	18.84	1.93018	0.967759
18.86	3.15343	0.663762	18.86	1.95582	0.982979
18.88	3.21931	0.84464	18.88	1.85581	0.967874
18.9	3.14662	0.874612	18.9	1.97173	0.945743
18.92	3.21863	0.861818	18.92	2.03346	0.920134
18.94	3.25531	0.918256	18.94	2.02944	0.968943
18.96	3.19769	0.800398	18.96	2.03482	0.894642
18.98	3.22464	0.855985	18.98	2.03548	0.861501
19	3.24717	0.774747	19	1.97414	0.936845
19.02	3.16467	0.68001	19.02	1.97145	0.977584
19.04	3.28389	0.854381	19.04	1.98587	0.930366
19.06	3.23874	0.856049	19.06	2.04861	1.04388
19.08	3.17718	0.529098	19.08	2.01841	0.82126
19.1	3.22661	0.877548	19.1	1.99331	0.822134
19.12	3.27416	0.858284	19.12	1.95722	1.0369
19.14	3.15312	0.530688	19.14	1.94839	0.931519
19.16	3.38165	0.545207	19.16	2.02804	0.970905
19.18	3.33257	0.800954	19.18	1.89653	0.841247
19.2	3.38218	0.247305	19.2	1.90804	0.924333
19.22	3.29876	0.655048	19.22	1.95049	0.854338
19.24	3.26039	0.529662	19.24	1.92009	0.887091
19.26	3.38439	0.61326	19.26	1.94534	0.896173
19.28	3.26847	0.514826	19.28	1.95893	0.934048
19.3	3.27873	0.854858	19.3	1.8875	0.955574
19.32	3.25311	0.881236	19.32	1.9526	0.865837
19.34	3.18004	0.826449	19.34	1.90552	1.02043
19.36	3.22669	0.887369	19.36	1.90339	0.861579
19.38	3.14462	0.847388	19.38	1.79509	0.920384
19.4	3.21187	0.787049	19.4	1.84618	0.970014
19.42	3.16786	0.741096	19.42	1.88936	0.917395
19.44	3.31252	0.819217	19.44	1.85815	0.8111
19.46	3.16115	0.515255	19.46	1.8882	0.882161
19.48	3.21319	0.816117	19.48	1.85594	0.871409
19.5	3.26525	0.799639	19.5	1.78971	0.774551
19.52	3.2326	0.832239	19.52	1.88395	0.8871
19.54	3.19613	0.926687	19.54	1.87711	0.875112
19.56	3.20861	0.836782	19.56	1.82165	0.902728
19.58	3.10696	0.500126	19.58	1.83956	1.00948
19.6	3.15202	0.582791	19.6	1.79342	0.583561
19.62	3.21545	0.710624	19.62	1.80801	0.885503
19.64	3.20389	0.928588	19.64	1.87767	0.967532
19.66	3.24396	0.564103	19.66	1.88806	0.878962
19.68	3.19045	0.643557	19.68	1.88399	0.869528
19.7	3.18703	0.563442	19.7	1.84757	0.817756
19.72	3.22175	0.707209	19.72	1.81952	1.05611
19.74	3.173	0.715567	19.74	1.88112	0.865394
19.76	3.19589	0.671035	19.76	1.90064	1.05129
19.78	3.16361	0.697011	19.78	1.88133	0.925491
19.8	3.23144	0.898228	19.8	1.83971	0.903252
19.82	3.20937	0.811168	19.82	1.90221	0.746002
19.84	3.35085	0.70409	19.84	1.78978	0.686086
19.86	3.24206	0.582265	19.86	1.85018	0.799801
19.88	3.20024	0.528792	19.88	1.77037	0.807562
19.9	3.23595	0.532224	19.9	1.90608	0.815387
19.92	3.28685	0.734961	19.92	1.85062	0.910438
19.94	3.28034	0.726114	19.94	1.9269	0.927258
19.96	3.2578	0.760023	19.96	1.85565	0.933453
19.98	3.35676	0.722218	19.98	1.92442	0.986716
20	3.31286	0.589202	20	1.99966	0.655865
20.02	3.22956	0.752373	20.02	1.96917	0.841943
20.04	3.20786	0.745294	20.04	1.97416	0.923269
20.06	3.25191	0.740519	20.06	1.96146	0.86765
20.08	3.178	0.740991	20.08	1.88857	0.895806
20.1	3.24	0.733667	20.1	1.86145	0.88105
20.12	3.2687	0.940976	20.12	1.89041	0.947788
20.14	3.22811	1.02585	20.14	1.90252	0.922383
20.16	3.27933	0.899539	20.16	1.97539	0.935258
20.18	3.20675	0.978333	20.18	1.83559	0.915641
20.2	3.17976	0.956594	20.2	1.92564	0.936223
20.22	3.16811	0.622508	20.22	1.88791	0.956086
20.24	3.179	0.992484	20.24	1.89102	0.994987
20.26	3.21143	0.948193	20.26	1.93972	0.984732
20.28	3.14154	0.719386	20.28	1.9859	0.928665
20.3	3.1148	0.69692	20.3	1.87891	0.764178
20.32	3.17541	0.705528	20.32	1.99815	0.899729
20.34	3.20997	0.828616	20.34	1.94452	0.927396
20.36	3.18592	0.780692	20.36	1.87863	0.895329
20.38	3.20751	0.72284	20.38	1.86836	1.0192
20.4	3.22913	0.965172	20.4	1.90779	0.93482
20.42	3.13339	0.981529	20.42	1.89465	0.968546
20.44	3.15743	0.943649	20.44	1.96283	0.925862
20.46	3.20842	0.704672	20.46	1.90039	1.03048
20.48	3.19321	0.728488	20.48	1.85191	1.05133
20.5	3.09798	0.614652	20.5	1.85544	0.939957
20.52	3.09944	0.530505	20.52	1.79293	1.01806
20.54	3.00401	0.677631	20.54	1.79112	0.906721
20.56	3.13417	0.627266	20.56	1.91598	0.947681
20.58	3.13811	0.741256	20.58	1.81501	0.899687
20.6	3.07582	0.536381	20.6	1.93631	0.920542
20.62	3.18903	1.0221	20.62	1.82845	0.9814
20.64	3.21347	1.11932	20.64	1.91006	0.973499
20.66	3.14435	0.984381	20.66	1.82854	0.877368
20.68	3.24079	0.78931	20.68	1.8323	0.736135
20.7	3.14326	0.932628	20.7	1.93202	0.971083
20.72	3.17492	0.962012	20.72	1.83949	0.925642
20.74	3.19926	0.841632	20.74	1.85092	0.937137
20.76	3.08696	0.5256	20.76	1.78871	0.762057
20.78	3.1577	0.810625	20.78	1.7985	0.738754
20.8	3.21183	0.540258	20.8	1.90189	0.968982
20.82	3.22494	0.95744	20.82	1.83966	0.820994
20.84	3.18534	0.969681	20.84	1.84695	0.952203
20.86	3.17314	0.950103	20.86	1.88511	0.873985
20.88	3.08811	1.01902	20.88	1.83757	0.758777
20.9	3.22645	0.93913	20.9	1.90599	0.841773
20.92	3.21404	1.00419	20.92	1.81187	0.873414
20.94	3.16603	0.926847	20.94	1.78374	0.771698
20.96	3.24233	0.99491	20.96	1.84747	0.86456
20.98	3.21806	0.941632	20.98	1.82895	0.864302
21	3.23962	0.914076	21	1.84722	1.00911
21.02	3.25116	1.03816	21.02	1.72476	0.943381
21.04	3.24631	0.857061	21.04	1.794	0.986682
21.06	3.24643	1.04101	21.06	1.78957	0.940077
21.08	3.2171	0.818892	21.08	1.91327	0.996202
21.1	3.19262	0.959641	21.1	1.78783	0.934244
21.12	3.2315	1.0472	21.12	1.75245	1.02775
21.14	3.30686	1.00801	21.14	1.76854	0.906419
21.16	3.25725	0.92586	21.16	1.92152	0.969731
21.18	3.25135	0.985412	21.18	1.95086	0.898284
21.2	3.34023	1.10473	21.2	1.94416	0.969577
21.22	3.34929	1.07487	21.22	1.89388	0.972748
21.24	3.27615	0.716982	21.24	1.83931	0.705785
21.26	3.2963	0.763831	21.26	1.86919	0.936908
21.28	3.27736	0.751591	21.28	1.83062	0.888584
21.3	3.17714	0.516809	21.3	1.78952	0.76569
21.32	3.14252	0.594058	21.32	1.93725	0.824808
21.34	3.18767	0.552244	21.34	1.92423	0.991243
21.36	3.17951	0.585265	21.36	1.89158	0.991347
21.38	3.07322	0.67833	21.38	1.80557	1.12077
21.4	3.19666	0.712291	21.4	1.81333	0.97744
21.42	3.21236	0.791354	21.42	1.77014	0.699865
21.44	3.22075	0.742699	21.44	1.7448	0.768509
21.46	3.2484	0.980937	21.46	1.74067	0.836221
21.48	3.16985	0.949895	21.48	1.91339	0.838759
21.5	3.13549	0.945904	21.5	1.86769	0.998561
21.52	3.22592	0.980534	21.52	1.97586	0.988406
21.54	3.26107	0.818454	21.54	1.86786	1.03085
21.56	3.2126	0.829979	21.56	1.96686	1.03787
21.58	3.17109	0.864887	21.58	1.92804	0.793527
21.6	3.20991	0.797664	21.6	1.83634	0.86261
21.62	3.21282	0.802397	21.62	1.87162	0.99204
21.64	3.25288	0.889311	21.64	1.94306	0.9655
21.66	3.2299	0.890318	21.66	1.99345	0.94193
21.68	3.19589	0.867795	21.68	1.87936	0.931519
21.7	3.19313	0.862763	21.7	1.76979	0.909663
21.72	3.16831	0.594481	21.72	1.8811	0.973619
21.74	3.16416	0.543332	21.74	1.86377	0.901249
21.76	3.17102	0.578836	21.76	1.86576	1.09732
21.78	3.20727	0.558823	21.78	1.93728	0.982793
21.8	3.22014	0.246448	21.8	1.9605	1.02937
21.82	3.22855	0.407379	21.82	1.87097	1.00777
21.84	3.22441	0.567318	21.84	1.83661	0.936168
21.86	3.14355	0.51535	21.86	1.8726	1.01976
21.88	3.15323	0.611911	21.88	1.70903	1.01811
21.9	3.21636	0.745884	21.9	1.8636	0.982475
21.92	3.18895	0.583858	21.92	1.83676	0.850322
21.94	3.21937	0.487235	21.94	1.85944	0.946871
21.96	3.18751	0.519592	21.96	1.91829	0.871321
21.98	3.17424	0.443728	21.98	1.90828	1.00547
22	3.19531	0.526642	22	1.90194	0.959699
22.02	3.15591	0.527089	22.02	1.95246	0.810588
22.04	3.12679	0.18294	22.04	1.84367	1.06046
22.06	3.15917	0.496297	22.06	1.88328	0.823096
22.08	3.24344	0.647063	22.08	1.85685	0.868007
22.1	3.23046	0.674061	22.1	1.83505	0.896559
22.12	3.06053	0.676875	22.12	1.89211	0.96652
22.14	3.19682	0.779136	22.14	1.92802	1.05119
22.16	3.12192	0.711603	22.16	1.79877	0.855174
22.18	3.29055	0.563914	22.18	1.87544	0.984807
22.2	3.19748	0.586528	22.2	1.91957	1.00243
22.22	3.19171	0.771564	22.22	1.89343	0.975539
22.24	3.20192	0.638683	22.24	1.91153	0.941369
22.26	3.245	0.724616	22.26	1.91724	1.00023
22.28	3.18139	0.624904	22.28	1.98195	0.883619
22.3	3.22965	0.654462	22.3	1.9682	0.787585
22.32	3.10045	0.709713	22.32	1.89057	0.886222
22.34	3.07905	0.758663	22.34	1.96665	0.936765
22.36	3.15472	0.748976	22.36	1.98327	0.895671
22.38	3.1602	0.710214	22.38	1.81603	0.884138
22.4	3.14366	0.782719	22.4	1.81265	0.986546
22.42	3.14073	0.571852	22.42	1.83925	1.04232
22.44	3.19465	0.588842	22.44	1.84302	0.848547
22.46	3.24435	0.691494	22.46	1.88378	1.01678
22.48	3.18553	0.538678	22.48	1.83799	0.948245
22.5	3.09772	1.01332	22.5	1.79878	0.971165
22.52	3.21005	0.855503	22.52	1.78697	0.767725
22.54	3.21426	0.698663	22.54	1.89014	0.810688
22.56	3.21283	0.738131	22.56	1.84539	0.892528
22.58	3.21195	0.776428	22.58	1.80132	0.758718
22.6	3.19393	0.706399	22.6	1.83242	0.888402
22.62	3.17499	0.512194	22.62	1.89251	0.982845
22.64	3.15812	0.710181	22.64	1.88467	0.901273
22.66	3.18675	0.599946	22.66	1.88117	1.0692
22.68	3.19542	0.867866	22.68	1.84977	0.886174
22.7	3.24184	0.61276	22.7	1.75139	0.935273
22.72	3.2529	0.722107	22.72	1.8032	1.03211
22.74	3.24837	0.720768	22.74	1.86922	0.878191
22.76	3.16211	0.768241	22.76	1.75797	1.03108
22.78	3.22215	0.764848	22.78	1.86405	0.901494
22.8	3.28592	0.718548	22.8	1.92543	0.966718
22.82	3.26126	0.710956	22.82	1.82391	1.01736
22.84	3.28779	0.554609	22.84	1.85723	1.01042
22.86	3.24099	0.731595	22.86	1.73877	0.793416
22.88	3.19588	0.547543	22.88	1.88721	1.16659
22.9	3.2354	0.737187	22.9	1.83333	0.884788
22.92	3.17896	1.02041	22.92	1.78821	0.943759
22.94	3.17683	0.968849	22.94	1.80597	1.03844
22.96	3.0574	0.848927	22.96	1.75298	0.935112
22.98	3.06035	0.733351	22.98	1.7952	0.938993
23	3.06633	0.708473	23	1.75655	0.975973
23.02	3.1409	0.653138	23.02	1.81862	1.0807
23.04	3.09581	0.72287	23.04	1.74264	1.02878
23.06	3.14388	0.692228	23.06	1.72046	0.82628
23.08	3.15756	0.730278	23.08	1.77526	0.916186
23.1	3.10899	0.713141	23.1	1.72879	1.0626
23.12	3.17599	0.690077	23.12	1.84339	1.02136
23.14	3.0504	0.685486	23.14	1.76193	0.990985
23.16	3.02809	0.731064	23.16	1.78042	1.06213
23.18	3.15218	0.742456	23.18	1.89172	1.04449
23.2	3.1424	0.704112	23.2	1.86404	0.990216
23.22	3.11263	0.736988	23.22	1.94775	0.953614
23.24	3.16633	0.773875	23.24	1.86542	0.850233
23.26	3.19378	0.740498	23.26	1.85644	0.838443
23.28	3.16764	0.887839	23.28	1.7971	0.911438
23.3	3.06429	0.963244	23.3	1.76089	0.964005
23.32	3.13798	0.723516	23.32	1.85021	0.820429
23.34	3.14257	0.676561	23.34	1.90873	0.828788
23.36	3.10891	0.732705	23.36	1.78524	1.02973
23.38	3.14548	0.828273	23.38	1.91202	0.905586
23.4	3.26441	0.750684	23.4	1.84387	0.89227
23.42	3.19242	0.751025	23.42	1.78304	0.892355
23.44	3.12577	0.803201	23.44	1.87004	0.978998
23.46	3.13576	0.723096	23.46	1.72633	0.963649
23.48	3.13974	0.745452	23.48	1.84957	0.895837
23.5	3.27136	0.707799	23.5	1.70912	0.903752
23.52	3.17861	0.535988	23.52	1.73265	0.943772
23.54	3.15714	0.625562	23.54	1.6633	0.995104
23.56	3.13221	0.68155	23.56	1.76144	0.935797
23.58	3.17445	0.739678	23.58	1.73037	0.838558
23.6	3.13822	0.746805	23.6	1.77394	0.591979
23.62	3.18887	0.562924	23.62	1.84837	0.882664
23.64	3.21968	0.728452	23.64	1.79743	0.92742
23.66	3.17786	0.708577	23.66	1.72131	0.89471
23.68	3.25825	0.768751	23.68	1.81098	0.979144
23.7	3.19522	0.771465	23.7	1.68973	0.832379
23.72	3.175	0.680161	23.72	1.74454	0.892236
23.74	3.1836	0.985821	23.74	1.84145	0.888807
23.76	3.20647	0.956775	23.76	1.86499	0.967249
23.78	3.26523	0.939799	23.78	1.87933	0.940543
23.8	3.22085	0.909326	23.8	1.80322	0.885427
23.82	3.14888	0.540923	23.82	1.77078	0.807021
23.84	3.17981	0.73554	23.84	1.84574	1.01792
23.86	3.16681	0.562731	23.86	1.81686	0.803107
23.88	3.17959	0.566692	23.88	1.88325	0.926626
23.9	3.19772	0.511843	23.9	1.84863	0.997569
23.92	3.25058	0.692814	23.92	1.86147	0.889687
23.94	3.21964	0.707771	23.94	1.84557	0.97206
23.96	3.19973	0.586281	23.96	1.84793	0.867213
23.98	3.17575	0.730105	23.98	1.72229	0.74762
24	3.20299	0.537304	24	1.75929	0.84563
24.02	3.21216	0.746607	24.02	1.85925	0.985202
24.04	3.19547	0.682076	24.04	1.8278	0.924217
24.06	3.23603	0.722857	24.06	1.79187	1.10036
24.08	3.20813	0.697698	24.08	1.86197	0.984519
24.1	3.11873	0.574532	24.1	1.97752	0.696224
24.12	3.22075	0.730306	24.12	1.76694	1.00927
24.14	3.26178	0.520303	24.14	1.91652	1.16532
24.16	3.22117	0.645928	24.16	1.90078	0.997539
24.18	3.19173	0.774174	24.18	1.90128	1.00909
24.2	3.14855	0.752996	24.2	1.88664	0.934819
24.22	3.13135	0.557628	24.22	1.74299	0.851688
24.24	3.1674	0.745702	24.24	1.88963	0.833917
24.26	3.1967	0.538298	24.26	1.79951	0.827897
24.28	3.19393	0.857811	24.28	1.9205	0.906936
24.3	3.1475	0.869902	24.3	1.78757	0.912997
24.32	3.20485	0.719234	24.32	1.84863	0.924257
24.34	3.19588	0.742398	24.34	1.82219	1.06612
24.36	3.31305	0.556128	24.36	1.8307	0.902377
24.38	3.21595	0.606221	24.38	1.78931	0.973697
24.4	3.29216	0.759136	24.4	1.8132	0.997633
24.42	3.31231	0.718638	24.42	1.85103	1.04958
24.44	3.27432	0.784827	24.44	1.82404	1.03963
24.46	3.27603	0.723595	24.46	1.80464	1.0062
24.48	3.27126	0.734727	24.48	1.85196	1.01296
24.5	3.26311	1.03915	24.5	1.77198	0.922222
24.52	3.16787	0.860031	24.52	1.80923	0.973547
24.54	3.25039	0.716046	24.54	1.8154	0.965807
24.56	3.17263	0.74918	24.56	1.84361	0.954452
24.58	3.23666	0.576564	24.58	1.8406	1.02751
24.6	3.28893	0.551993	24.6	1.9427	0.792538
24.62	3.24717	0.80108	24.62	1.81849	0.775525
24.64	3.27502	0.719335	24.64	1.83409	0.949896
24.66	3.23296	0.799557	24.66	1.86872	0.933973
24.68	3.32862	0.822132	24.68	1.84811	0.959298
24.7	3.22647	0.604491	24.7	1.91049	1.04497
24.72	3.30951	0.711804	24.72	1.951	0.88887
24.74	3.24633	0.506276	24.74	1.98251	1.00741
24.76	3.15392	0.724267	24.76	2.01164	1.00728
24.78	3.12699	0.744296	24.78	1.91449	0.942518
24.8	3.08799	0.742583	24.8	1.98705	0.803922
24.82	3.09085	0.597602	24.82	1.93654	0.870059
24.84	3.18699	0.508873	24.84	1.93802	0.930661
24.86	3.15923	0.733366	24.86	2.0414	0.949071
24.88	3.19611	0.689637	24.88	2.09585	0.947214
24.9	3.13621	0.724575	24.9	2.07952	1.04749
24.92	3.22181	0.711263	24.92	1.90194	1.07608
24.94	3.11983	0.72524	24.94	1.8444	0.997012
24.96	3.16304	0.565161	24.96	1.76409	0.858493
24.98	3.18304	0.734599	24.98	1.77652	1.01508
25	3.1826	0.782458	25	1.85304	0.97897
25.02	3.21359	0.776658	25.02	1.87016	0.993585
25.04	3.23121	0.72523	25.04	1.87057	0.890712
25.06	3.19883	0.5582	25.06	1.77455	0.83909
25.08	3.14623	0.746689	25.08	1.89297	0.803973
25.1	3.17997	0.505922	25.1	1.84086	0.793363
25.12	3.11092	0.798488	25.12	1.90025	0.95695
25.14	3.16301	0.701057	25.14	1.93885	0.854089
25.16	3.1205	0.593305	25.16	1.82732	0.797275
25.18	3.04967	0.541606	25.18	1.80412	0.806148
25.2	3.07701	0.756727	25.2	1.84512	0.642274
25.22	3.10706	0.764486	25.22	1.86839	0.973756
25.24	3.1842	0.734653	25.24	1.82301	0.99089
25.26	3.16183	0.57623	25.26	1.91939	0.857971
25.28	3.17007	0.50655	25.28	1.84571	1.07618
25.3	3.13753	0.98795	25.3	1.90363	0.931933
25.32	3.15014	0.779299	25.32	1.90923	1.01951
25.34	3.14353	0.743271	25.34	1.90245	0.895811
25.36	3.06179	0.69569	25.36	1.772	1.03197
25.38	3.20539	0.665928	25.38	1.82048	1.04938
25.4	3.16132	0.488175	25.4	1.77226	0.932692
25.42	3.13516	0.815948	25.42	1.80385	0.826539
25.44	3.17875	0.70914	25.44	1.69681	0.869577
25.46	3.15733	0.716636	25.46	1.84715	0.945982
25.48	3.18025	0.715611	25.48	1.82678	0.844861
25.5	3.18679	0.483552	25.5	1.77732	0.833601
25.52	3.24108	0.565012	25.52	1.78989	0.902271
25.54	3.21863	0.529829	25.54	1.86331	0.876571
25.56	3.15901	0.761996	25.56	1.86375	0.972923
25.58	3.25274	0.790356	25.58	1.80183	0.868851
25.6	3.3308	0.753395	25.6	1.79393	1.0132
25.62	3.33846	0.697346	25.62	1.91073	0.958534
25.64	3.20499	0.737114	25.64	1.87826	0.991704
25.66	3.1619	0.52792	25.66	1.88956	0.843268
25.68	3.14912	0.550678	25.68	1.8935	0.884997
25.7	3.11806	0.696525	25.7	1.88008	0.863086
25.72	3.14288	0.788997	25.72	2.04713	0.907606
25.74	3.11963	0.723371	25.74	1.92627	0.964776
25.76	3.19354	0.744542	25.76	1.96355	0.898055
25.78	3.16312	0.511794	25.78	1.92063	0.907431
25.8	3.32909	0.545479	25.8	1.91113	1.03397
25.82	3.21037	0.711372	25.82	1.95278	0.913434
25.84	3.21208	0.722906	25.84	2.03545	0.946275
25.86	3.13234	1.0331	25.86	1.97796	0.796911
25.88	3.09958	0.718042	25.88	1.98099	0.829005
25.9	3.1701	0.677819	25.9	1.86994	0.99747
25.92	3.173	0.629906	25.92	1.9416	1.04637
25.94	3.18832	0.684317	25.94	2.08012	0.757182
25.96	3.10187	0.797243	25.96	1.93798	0.793212
25.98	3.0981	0.741941	25.98	1.92646	0.775379
26	3.13229	0.753031	26	1.90402	0.890665
26.02	3.18385	1.02713	26.02	1.88556	0.874978
26.04	3.19883	0.735771	26.04	1.89032	0.87569
26.06	3.1229	0.79828	26.06	1.94418	0.843511
26.08	3.17981	0.738642	26.08	1.97093	0.828006
26.1	3.179	0.700929	26.1	1.81835	0.962592
26.12	3.14827	0.768129	26.12	1.8214	1.10274
26.14	3.19001	0.722615	26.14	1.79527	0.883847
26.16	3.19982	0.721446	26.16	1.80215	1.04988
26.18	3.24878	1.03956	26.18	1.85878	0.913284
26.2	3.31023	1.01526	26.2	1.76564	0.915879
26.22	3.22809	1.01814	26.22	1.84826	0.854431
26.24	3.28607	1.02277	26.24	1.88844	0.794469
26.26	3.27166	0.989323	26.26	1.94433	0.86859
26.28	3.17738	0.723877	26.28	1.75757	0.925831
26.3	3.14625	0.721432	26.3	1.8209	0.98217
26.32	3.2126	0.785776	26.32	1.92747	0.805129
26.34	3.18072	0.729158	26.34	1.80999	1.05991
26.36	3.12132	0.932288	26.36	1.89308	0.962476
26.38	3.2014	0.983907	26.38	1.88602	0.866193
26.4	3.28653	0.948969	26.4	1.85508	1.06419
26.42	3.24898	0.967897	26.42	1.914	0.737155
26.44	3.23612	0.688431	26.44	1.88022	0.798445
26.46	3.27603	0.684683	26.46	1.86737	0.848185
26.48	3.27089	0.570085	26.48	1.794	0.963375
26.5	3.219	0.557409	26.5	1.79092	0.953099
26.52	3.16559	0.989354	26.52	1.84553	0.738426
26.54	3.1886	0.956491	26.54	1.73695	1.09951
26.56	3.13629	0.508869	26.56	1.75395	0.971323
26.58	3.16604	0.540559	26.58	1.73954	1.06639
26.6	3.22075	1.00387	26.6	1.84142	0.93965
26.62	3.16307	0.895794	26.62	1.71588	0.843919
26.64	3.21646	0.816692	26.64	1.74091	0.992317
26.66	3.17315	0.781393	26.66	1.74015	0.903003
26.68	3.13767	0.531921	26.68	1.65964	0.835325
26.7	3.16526	0.515446	26.7	1.74495	0.799488
26.72	3.10915	0.518306	26.72	1.72774	0.879372
26.74	3.10254	0.540967	26.74	1.71755	1.05674
26.76	3.01451	0.767876	26.76	1.71752	0.884484
26.78	3.11524	0.516495	26.78	1.75549	1.0949
26.8	3.08342	0.711776	26.8	1.81111	0.656399
26.82	3.07006	0.744738	26.82	1.80401	0.795602
26.84	3.086	0.76812	26.84	1.79878	0.840371
26.86	3.07278	0.915153	26.86	1.7951	0.849432
26.88	3.05577	0.55478	26.88	1.8812	1.10533
26.9	3.07594	0.73977	26.9	1.90992	0.912246
26.92	3.00717	0.752582	26.92	1.88331	0.872385
26.94	3.09411	0.991509	26.94	1.87812	0.732631
26.96	3.12519	0.937763	26.96	1.96221	0.9034
26.98	3.15372	0.974761	26.98	1.9115	0.818618
27	3.25833	0.95528	27	1.96923	0.797629
27.02	3.20172	0.965152	27.02	1.93494	1.08684
27.04	3.20512	0.967985	27.04	1.87569	0.882658
27.06	3.20173	0.976588	27.06	1.85592	0.847155
27.08	3.15441	1.02304	27.08	1.87713	0.8874
27.1	3.16688	0.986554	27.1	1.9363	0.983699
27.12	3.2134	0.592977	27.12	1.92551	0.997591
27.14	3.18888	0.527918	27.14	1.90063	1.0188
27.16	3.21166	0.564236	27.16	2.01406	0.92568
27.18	3.21384	0.617579	27.18	1.96769	0.98712
27.2	3.15392	1.01321	27.2	1.91299	0.921487
27.22	3.17594	0.964276	27.22	1.86296	0.976069
27.24	3.22164	0.76153	27.24	1.82043	0.947977
27.26	3.22857	0.687938	27.26	1.96401	0.826844
27.28	3.23021	0.776104	27.28	1.95502	0.618199
27.3	3.25046	1.03952	27.3	2.02542	0.8315
27.32	3.12504	0.68804	27.32	1.84395	0.699819
27.34	3.22717	1.04263	27.34	1.94291	1.04864
27.36	3.17388	0.930932	27.36	1.79963	1.00629
27.38	3.20469	0.910048	27.38	1.94761	0.953024
27.4	3.23974	1.02584	27.4	1.99753	1.01172
27.42	3.27924	0.947287	27.42	1.95702	1.03664
27.44	3.20163	0.970554	27.44	1.87556	1.03929
27.46	3.213	0.951181	27.46	1.94946	1.00119
27.48	3.25862	0.967075	27.48	1.79794	0.921555
27.5	3.25668	1.01552	27.5	1.82379	0.964269
27.52	3.15744	0.989094	27.52	1.81478	0.98024
27.54	3.27797	0.887078	27.54	1.88003	0.961501
27.56	3.2699	0.932491	27.56	1.92167	0.907587
27.58	3.14952	1.06695	27.58	1.93679	0.973979
27.6	3.22442	0.672622	27.6	1.83024	0.890225
27.62	3.23068	0.622968	27.62	1.86655	0.917755
27.64	3.30462	0.539534	27.64	1.9495	0.981837
27.66	3.20764	0.568783	27.66	1.82455	0.954655
27.68	3.23281	0.712156	27.68	1.91017	1.03186
27.7	3.18763	0.695146	27.7	1.77148	0.976967
27.72	3.212	0.699092	27.72	1.97984	1.08517
27.74	3.18587	0.569267	27.74	1.83471	1.04739
27.76	3.17957	0.506485	27.76	1.91032	0.895247
27.78	3.13675	0.672994	27.78	1.79532	0.876309
27.8	3.20112	0.72616	27.8	1.8761	0.824537
27.82	3.22954	0.743932	27.82	1.84594	0.832436
27.84	3.28519	0.929853	27.84	1.80827	0.962892
27.86	3.22172	0.968487	27.86	1.85553	0.989676
27.88	3.25385	0.960578	27.88	1.79647	0.938401
27.9	3.29405	1.04183	27.9	1.73904	0.971589
27.92	3.27033	1.0272	27.92	1.81084	0.75766
27.94	3.3185	0.693585	27.94	1.78246	0.864304
27.96	3.26264	0.745704	27.96	1.79311	0.861831
27.98	3.34216	0.576931	27.98	1.86482	0.96372
28	3.2855	0.687638	28	1.84954	1.00231
28.02	3.35077	0.701121	28.02	1.74946	1.03062
28.04	3.35306	0.724309	28.04	1.85332	0.857404
28.06	3.28559	0.957181	28.06	1.76974	1.02312
28.08	3.37703	0.704716	28.08	1.86983	0.993153
28.1	3.32479	0.713178	28.1	1.75373	0.966175
28.12	3.27229	0.736313	28.12	1.80468	0.955253
28.14	3.22866	0.977706	28.14	1.83869	0.981813
28.16	3.30065	1.0078	28.16	1.73702	0.925393
28.18	3.25397	0.959207	28.18	1.86387	0.800457
28.2	3.32474	0.956692	28.2	1.77876	0.706931
28.22	3.28205	0.990964	28.22	1.8772	0.920762
28.24	3.28868	0.979134	28.24	1.8273	1.07909
28.26	3.30882	0.989334	28.26	1.7813	0.831519
28.28	3.29691	0.743734	28.28	1.84579	0.933593
28.3	3.29691	0.781188	28.3	1.80391	0.92162
28.32	3.27791	0.635046	28.32	1.78101	0.892933
28.34	3.32594	0.515638	28.34	1.7929	0.858133
28.36	3.26723	0.651205	28.36	1.76234	1.07181
28.38	3.26632	0.551733	28.38	1.72378	0.938413
28.4	3.29417	0.572004	28.4	1.8546	0.984303
28.42	3.31143	0.927651	28.42	1.77441	0.769626
28.44	3.29383	1.00407	28.44	1.86224	0.86942
28.46	3.29477	0.999176	28.46	1.86023	0.838042
28.48	3.3142	0.922035	28.48	1.78512	0.988241
28.5	3.2933	1.06337	28.5	1.97443	0.926312
28.52	3.22047	0.567669	28.52	1.91713	0.934466
28.54	3.30814	0.571467	28.54	1.77643	0.924873
28.56	3.32737	0.672056	28.56	1.75677	0.955064
28.58	3.23129	0.944367	28.58	1.85151	0.776935
28.6	3.24351	0.948789	28.6	1.85377	0.788139
28.62	3.23825	0.99439	28.62	1.81264	0.817359
28.64	3.29837	0.894658	28.64	1.66662	0.65995
28.66	3.30985	0.563157	28.66	1.81724	0.801692
28.68	3.25668	0.749076	28.68	1.82634	0.843408
28.7	3.2362	0.85747	28.7	1.80183	0.856107
28.72	3.27091	0.657749	28.72	1.8033	0.945277
28.74	3.27726	0.512996	28.74	1.90019	0.873577
28.76	3.27999	0.698435	28.76	1.80416	0.986848
28.78	3.3529	1.02892	28.78	1.84859	0.942324
28.8	3.3338	0.97042	28.8	1.81096	0.890147
28.82	3.28726	0.940561	28.82	1.89889	0.946079
28.84	3.28392	0.723999	28.84	1.86674	0.897608
28.86	3.31188	0.589529	28.86	1.75991	0.911899
28.88	3.30927	0.552688	28.88	1.81324	0.866239
28.9	3.31984	1.05212	28.9	1.86766	0.976609
28.92	3.31871	0.957584	28.92	1.86444	0.991627
28.94	3.28266	0.677693	28.94	1.82794	1.00886
28.96	3.29069	0.564868	28.96	1.75532	1.03646
28.98	3.25795	1.00355	28.98	1.82061	0.846299
29	3.2859	0.958665	29	1.80647	0.799823
29.02	3.27149	0.913136	29.02	1.7797	0.842661
29.04	3.22786	0.976483	29.04	1.87173	1.11351
29.06	3.22204	0.598572	29.06	1.81199	0.998523
29.08	3.28943	0.788137	29.08	1.68812	0.84376
29.1	3.293	0.762765	29.1	1.76279	0.795737
29.12	3.33949	0.598019	29.12	1.82933	0.787921
29.14	3.30212	0.72298	29.14	1.79823	0.812882
29.16	3.27045	0.568908	29.16	1.82423	1.11838
29.18	3.32586	0.529163	29.18	1.73521	1.02739
29.2	3.24196	0.662585	29.2	1.82575	1.05278
29.22	3.25977	1.03535	29.22	1.84138	0.996033
29.24	3.35471	0.802186	29.24	1.84981	0.940083
29.26	3.25093	0.868296	29.26	1.78825	1.12898
29.28	3.27925	0.921854	29.28	1.76245	0.97846
29.3	3.22313	0.996266	29.3	1.8279	1.0822
29.32	3.20232	0.765414	29.32	1.79368	0.933454
29.34	3.16939	0.677924	29.34	1.80513	0.891142
29.36	3.20502	0.974665	29.36	1.81759	0.868173
29.38	3.24595	0.991191	29.38	1.82677	1.11687
29.4	3.32086	0.725877	29.4	1.74765	0.909174
29.42	3.2581	0.729468	29.42	1.7903	0.912887
29.44	3.26153	0.702811	29.44	1.79638	0.855741
29.46	3.32167	0.697325	29.46	1.69918	0.984639
29.48	3.28458	0.931034	29.48	1.72927	0.866829
29.5	3.27207	0.934787	29.5	1.69863	0.916537
29.52	3.30069	0.934766	29.52	1.74049	1.02649
29.54	3.28243	0.794841	29.54	1.71779	0.958741
29.56	3.37479	0.520966	29.56	1.74475	0.735726
29.58	3.31339	0.482512	29.58	1.71262	1.04276
29.6	3.36179	0.703894	29.6	1.76624	0.720524
29.62	3.28447	0.734741	29.62	1.66626	0.84675
29.64	3.28243	0.978586	29.64	1.70898	1.00929
29.66	3.29457	0.962749	29.66	1.70945	0.955473
29.68	3.26726	0.760748	29.68	1.71153	0.998041
29.7	3.21072	0.723578	29.7	1.63514	1.04225
29.72	3.23039	0.785129	29.72	1.67888	0.963832
29.74	3.17679	1.01127	29.74	1.73671	0.917884
29.76	3.14893	0.674924	29.76	1.82659	0.907924
29.78	3.18242	0.825896	29.78	1.76177	0.932462
29.8	3.20401	0.690744	29.8	1.77385	0.934443
29.82	3.1754	0.65722	29.82	1.76892	0.981947
29.84	3.23747	0.723413	29.84	1.82174	0.914189
29.86	3.29538	0.565121	29.86	1.72549	1.06035
29.88	3.26953	1.01343	29.88	1.77875	0.954804
29.9	3.29495	1.0595	29.9	1.7386	0.930886
29.92	3.34698	0.660271	29.92	1.77494	0.89606
29.94	3.3712	0.937051	29.94	1.70956	1.0542
29.96	3.34181	0.967538	29.96	1.72237	0.776099
29.98	3.31777	0.803291	29.98	1.68064	0.892629
30	3.16748	1.07487	30	1.7133	0.895493
30.02	3.20683	0.951044	30.02	1.68035	0.964765
30.04	3.22446	1.02165	30.04	1.66901	0.806269
30.06	3.25684	1.04091	30.06	1.66386	0.958804
30.08	3.27231	0.972681	30.08	1.70495	0.864055
30.1	3.28313	0.780949	30.1	1.73417	0.860303
30.12	3.19461	0.946904	30.12	1.71734	0.841171
30.14	3.29071	0.922973	30.14	1.72753	0.981941
30.16	3.24881	1.01183	30.16	1.67664	0.779847
30.18	3.26424	0.985778	30.18	1.72597	0.91954
30.2	3.27528	0.767121	30.2	1.67039	0.909936
30.22	3.23542	0.952681	30.22	1.70865	0.828467
30.24	3.24005	0.704309	30.24	1.80652	0.888111
30.26	3.33452	0.636567	30.26	1.69257	0.881543
30.28	3.27703	0.507943	30.28	1.75695	0.590995
30.3	3.20557	0.5611	30.3	1.7077	0.967425
30.32	3.25436	0.717512	30.32	1.80086	0.800572
30.34	3.22567	0.962708	30.34	1.71632	0.790505
30.36	3.21791	0.702725	30.36	1.68583	0.671363
30.38	3.25725	0.795098	30.38	1.7145	0.905796
30.4	3.24171	0.715195	30.4	1.74423	0.997542
30.42	3.24511	0.735937	30.42	1.70352	0.893751
30.44	3.30764	0.759221	30.44	1.7789	0.937138
30.46	3.20137	0.756187	30.46	1.86635	0.976168
30.48	3.21491	0.778166	30.48	1.71554	0.935553
30.5	3.26381	0.741082	30.5	1.75665	0.843975
30.52	3.21449	0.728651	30.52	1.71763	0.938147
30.54	3.13004	0.634193	30.54	1.73414	0.876299
30.56	3.19439	0.690507	30.56	1.74275	0.846498
30.58	3.20335	0.652521	30.58	1.7015	1.01514
30.6	3.27965	0.709234	30.6	1.73772	1.00174
30.62	3.19623	0.704593	30.62	1.70753	0.965817
30.64	3.19268	0.88534	30.64	1.76524	0.963911
30.66	3.14931	1.04285	30.66	1.79155	0.932549
30.68	3.07255	0.986842	30.68	1.73817	0.837511
30.7	3.15759	1.04073	30.7	1.79101	0.893488
30.72	3.20289	0.952655	30.72	1.73746	0.916321
30.74	3.25172	0.949509	30.74	1.76059	0.866471
30.76	3.22435	0.657212	30.76	1.80176	0.800654
30.78	3.18794	0.903862	30.78	1.70742	0.985834
30.8	3.20871	0.97624	30.8	1.75356	0.937977
30.82	3.22368	0.965504	30.82	1.73799	0.99644
30.84	3.22958	0.966936	30.84	1.68233	0.939727
30.86	3.20905	1.03153	30.86	1.73436	1.03396
30.88	3.14756	0.983343	30.88	1.67997	0.834319
30.9	3.17763	0.546572	30.9	1.80133	1.00341
30.92	3.22488	0.519543	30.92	1.72222	0.86941
30.94	3.0913	0.665604	30.94	1.79522	1.09285
30.96	3.16704	0.731317	30.96	1.75658	0.905159
30.98	3.15556	0.727482	30.98	1.7932	1.01978
31	3.12755	0.739876	31	1.77816	0.935585
31.02	3.09456	0.944214	31.02	1.72788	0.94542
31.04	3.11016	0.988268	31.04	1.76268	0.953448
31.06	3.22945	0.971366	31.06	1.785	0.9296
31.08	3.1799	1.02625	31.08	1.75165	0.901762
31.1	3.17775	0.721834	31.1	1.84917	1.05799
31.12	3.2614	0.708024	31.12	1.76828	1.03511
31.14	3.22909	0.980974	31.14	1.79378	0.943936
31.16	3.3035	0.727651	31.16	1.79013	0.930245
31.18	3.13943	0.980754	31.18	1.77063	0.902421
31.2	3.21355	0.993972	31.2	1.731	0.938918
31.22	3.25087	0.867178	31.22	1.80205	0.886242
31.24	3.27872	1.01451	31.24	1.63232	0.790604
31.26	3.23381	0.944078	31.26	1.65185	0.884891
31.28	3.19654	0.952308	31.28	1.70011	0.84604
31.3	3.24451	0.73758	31.3	1.63224	0.863266
31.32	3.11312	0.981214	31.32	1.81708	0.920978
31.34	3.14721	0.955188	31.34	1.68185	0.878994
31.36	3.16657	0.775803	31.36	1.70083	1.05587
31.38	3.29877	0.987214	31.38	1.74536	0.922488
31.4	3.16239	0.90739	31.4	1.7186	0.979325
31.42	3.14127	1.02398	31.42	1.80174	0.908679
31.44	3.22139	0.98574	31.44	1.74219	1.11452
31.46	3.14913	0.755726	31.46	1.75951	0.827317
31.48	3.23298	0.701485	31.48	1.75698	0.980982
31.5	3.25356	0.762061	31.5	1.72352	1.01677
31.52	3.25536	0.68089	31.52	1.7199	0.886623
31.54	3.18925	0.729859	31.54	1.732	0.912556
31.56	3.19096	0.721676	31.56	1.83964	0.767963
31.58	3.25083	0.960194	31.58	1.90811	1.03254
31.6	3.2078	0.730867	31.6	1.88012	0.911972
31.62	3.20632	0.740279	31.62	1.89326	0.944509
31.64	3.19199	0.846391	31.64	1.86388	1.14385
31.66	3.2174	0.980195	31.66	1.91101	0.928573
31.68	3.26754	0.938296	31.68	1.93761	0.880254
31.7	3.16694	0.750778	31.7	1.84504	0.852623
31.72	3.26222	0.541027	31.72	2.01697	0.949709
31.74	3.33031	0.555463	31.74	1.95083	0.983328
31.76	3.25351	0.647784	31.76	1.90899	1.01632
31.78	3.22693	0.972281	31.78	1.81129	0.881497
31.8	3.28553	0.96201	31.8	1.92052	0.921709
31.82	3.28908	0.976239	31.82	1.87849	1.06981
31.84	3.38457	0.969686	31.84	1.93716	0.90348
31.86	3.33278	0.993989	31.86	1.73829	0.894209
31.88	3.37654	0.952984	31.88	1.8487	0.949301
31.9	3.2564	0.552053	31.9	1.80619	0.886691
31.92	3.38839	0.551193	31.92	1.82445	0.803421
31.94	3.34147	1.00331	31.94	1.77074	0.963055
31.96	3.33722	0.840653	31.96	1.84262	0.93765
31.98	3.32026	0.507891	31.98	1.94824	0.84298
32	3.39891	0.621089	32	1.85398	1.01055
32.02	3.35918	0.807096	32.02	1.86505	0.862168
32.04	3.28672	0.554553	32.04	1.95143	1.08271
32.06	3.25524	0.673237	32.06	1.92886	0.891803
32.08	3.28351	0.974482	32.08	1.93186	0.915131
32.1	3.35679	0.715108	32.1	1.79591	0.878338
32.12	3.25189	0.962312	32.12	1.88704	0.796135
32.14	3.27452	0.659115	32.14	1.87577	0.950687
32.16	3.25433	1.029	32.16	1.87856	0.885747
32.18	3.2928	0.995502	32.18	1.87968	0.885132
32.2	3.32694	1.00046	32.2	1.90923	0.9749
32.22	3.29052	0.71811	32.22	1.92183	0.916785
32.24	3.36165	0.614506	32.24	1.75758	0.828859
32.26	3.30553	0.700872	32.26	1.77508	1.06554
32.28	3.25106	0.710714	32.28	1.83063	0.801231
32.3	3.27377	0.717324	32.3	1.87673	0.903347
32.32	3.21798	0.710524	32.32	1.88603	0.897765
32.34	3.14831	0.796119	32.34	1.93988	0.750726
32.36	3.1847	1.04475	32.36	1.89233	0.803193
32.38	3.16638	0.88755	32.38	1.87193	0.873527
32.4	3.18073	0.881131	32.4	1.86944	1.16106
32.42	3.33358	0.873165	32.42	1.8222	0.998843
32.44	3.29252	0.693943	32.44	1.96791	0.806478
32.46	3.34466	0.684022	32.46	1.94911	1.00651
32.48	3.39372	0.721398	32.48	1.87546	0.866247
32.5	3.43794	0.953104	32.5	1.8626	0.598848
32.52	3.35213	1.0075	32.52	1.86637	0.749291
32.54	3.31092	0.661985	32.54	1.95559	0.722896
32.56	3.2467	1.01206	32.56	2.00984	0.953132
32.58	3.26738	0.885085	32.58	1.92814	0.888137
32.6	3.33721	1.03036	32.6	1.94523	0.57445
32.62	3.3733	1.08438	32.62	2.01474	0.740896
32.64	3.2206	0.563617	32.64	1.90562	1.09352
32.66	3.31173	1.03411	32.66	1.91225	1.00625
32.68	3.29317	0.69285	32.68	1.84678	0.980067
32.7	3.36428	0.485592	32.7	1.82389	0.856184
32.72	3.38203	0.520088	32.72	1.90502	0.846966
32.74	3.37656	0.616362	32.74	1.87678	0.827073
32.76	3.43005	0.721972	32.76	1.89577	0.858794
32.78	3.40227	0.735676	32.78	1.90802	0.867035
32.8	3.40653	0.717047	32.8	1.90721	0.884435
32.82	3.36044	0.702689	32.82	1.86283	0.747492
32.84	3.27866	0.992375	32.84	1.82374	0.867647
32.86	3.27644	1.01756	32.86	1.8617	0.793194
32.88	3.24459	0.957903	32.88	1.87624	0.78236
32.9	3.23655	0.740372	32.9	1.8297	0.946047
32.92	3.26229	0.729205	32.92	1.83253	0.78963
32.94	3.17876	0.973574	32.94	1.88557	0.77053
32.96	3.21782	0.93321	32.96	1.80509	0.868607
32.98	3.3104	1.02446	32.98	1.82142	0.994266
33	3.20059	1.02561	33	1.8093	1.08444
33.02	3.29092	1.01649	33.02	1.873	0.733257
33.04	3.26315	0.954631	33.04	1.95532	0.905661
33.06	3.28667	1.00291	33.06	1.95448	0.969898
33.08	3.28155	0.993413	33.08	1.84657	0.870088
33.1	3.22489	0.796484	33.1	1.87279	0.850307
33.12	3.24355	1.00767	33.12	1.89562	0.914111
33.14	3.28347	0.944155	33.14	1.93897	0.893836
33.16	3.27066	1.03351	33.16	1.87195	0.923957
33.18	3.16997	0.933127	33.18	1.91282	1.11279
33.2	3.20063	1.03756	33.2	1.77936	0.796241
33.22	3.26737	1.01571	33.22	1.75818	0.727285
33.24	3.26656	0.927642	33.24	1.88224	0.94684
33.26	3.1077	1.03772	33.26	1.92315	0.756172
33.28	3.21934	0.962693	33.28	1.82278	0.917014
33.3	3.14245	0.648879	33.3	1.8292	0.891916
33.32	3.23161	0.704377	33.32	1.83866	0.84546
33.34	3.1972	0.550491	33.34	1.93705	0.962112
33.36	3.25034	0.619735	33.36	1.96909	0.850093
33.38	3.24066	0.652236	33.38	1.93721	0.793379
33.4	3.3321	0.528136	33.4	1.92656	0.731882
33.42	3.23671	0.729133	33.42	1.93536	0.848041
33.44	3.2241	0.817157	33.44	1.92394	0.88277
33.46	3.30608	0.985167	33.46	1.84228	0.713831
33.48	3.35418	0.555779	33.48	1.95429	0.884981
33.5	3.30401	1.05231	33.5	2.01039	0.813853
33.52	3.29233	1.05482	33.52	2.0197	0.949172
33.54	3.24598	0.981341	33.54	1.96246	0.666954
33.56	3.22494	0.985988	33.56	1.91092	0.889717
33.58	3.18464	1.06615	33.58	1.88678	0.54448
33.6	3.35737	0.749313	33.6	1.92476	0.75108
33.62	3.2231	0.806582	33.62	1.86037	0.488504
33.64	3.33804	0.974822	33.64	1.89633	0.830329
33.66	3.23001	0.956966	33.66	1.9596	0.762495
33.68	3.2406	0.994719	33.68	1.9688	0.643387
33.7	3.19739	0.890303	33.7	1.95818	0.540238
33.72	3.16195	0.947984	33.72	1.9364	0.806663
33.74	3.24411	1.0635	33.74	1.97755	0.819008
33.76	3.2029	0.712103	33.76	2.01343	0.832576
33.78	3.275	0.995486	33.78	1.90784	0.802312
33.8	3.2945	0.502822	33.8	1.93734	0.834273
33.82	3.24793	0.488742	33.82	1.85883	0.878208
33.84	3.2878	0.719384	33.84	1.93465	0.785028
33.86	3.32902	0.72277	33.86	1.97912	0.733705
33.88	3.21974	0.95575	33.88	1.95683	0.731659
33.9	3.18781	0.709321	33.9	1.93866	0.749348
33.92	3.19587	0.890392	33.92	1.97831	0.859388
33.94	3.1934	0.970499	33.94	1.85359	0.579443
33.96	3.28187	0.913582	33.96	1.8688	0.555438
33.98	3.23695	1.02918	33.98	1.83717	0.936853
34	3.35114	1.0099	34	1.98306	0.765187
34.02	3.37739	0.673017	34.02	1.89076	0.710457
34.04	3.28046	0.642654	34.04	1.96373	0.414695
34.06	3.34634	0.966164	34.06	1.87433	0.689363
34.08	3.32254	0.967208	34.08	1.9364	0.831156
34.1	3.25006	1.01496	34.1	1.88096	0.8287
34.12	3.30994	1.00971	34.12	1.92253	0.797078
34.14	3.25436	0.94756	34.14	1.93428	0.705517
34.16	3.30412	0.917332	34.16	1.98737	0.740465
34.18	3.32109	0.737849	34.18	1.97725	0.634657
34.2	3.2207	0.571063	34.2	1.9168	0.963125
34.22	3.31199	0.810492	34.22	2.03189	0.915879
34.24	3.25772	0.552487	34.24	1.97933	0.902249
34.26	3.30042	0.578992	34.26	2.0016	0.789002
34.28	3.24051	0.675751	34.28	1.99249	0.819373
34.3	3.25586	0.517119	34.3	2.03647	0.790301
34.32	3.36875	0.954975	34.32	2.05188	0.816288
34.34	3.2429	0.496593	34.34	1.98917	0.895932
34.36	3.31091	0.786274	34.36	1.93332	0.878609
34.38	3.17547	0.539112	34.38	1.95288	0.723147
34.4	3.2375	0.572442	34.4	2.05504	0.806545
34.42	3.08989	0.953201	34.42	2.03062	0.682012
34.44	3.24715	0.702229	34.44	1.99523	0.777022
34.46	3.23817	0.5315	34.46	1.89857	0.689252
34.48	3.27997	0.548457	34.48	1.9553	0.817006
34.5	3.28817	0.551636	34.5	1.91397	0.69888
34.52	3.27955	0.534687	34.52	1.95317	0.930527
34.54	3.17392	0.772791	34.54	1.96203	0.646454
34.56	3.26573	0.656314	34.56	1.83352	0.73095
34.58	3.27087	0.650151	34.58	1.84542	0.740518
34.6	3.25747	0.714037	34.6	1.88004	0.767509
34.62	3.31537	0.984874	34.62	1.97201	0.690217
34.64	3.27887	0.72811	34.64	1.88947	0.596599
34.66	3.23164	0.753974	34.66	1.90005	0.754603
34.68	3.24457	0.982813	34.68	1.85544	0.613119
34.7	3.17383	0.510907	34.7	1.87604	0.607735
34.72	3.06795	0.951071	34.72	1.87355	0.766612
34.74	3.18762	0.9425	34.74	1.94265	0.802367
34.76	3.18102	0.952757	34.76	1.93957	0.799669
34.78	3.08606	0.957113	34.78	1.86992	0.760418
34.8	3.1085	0.989765	34.8	1.91946	0.915111
34.82	3.16209	0.735553	34.82	1.88739	0.805395
34.84	3.2318	0.96593	34.84	1.84091	0.774812
34.86	3.23974	0.929339	34.86	1.94456	0.908322
34.88	3.22008	0.571401	34.88	1.87347	0.689375
34.9	3.24953	0.732833	34.9	1.90085	0.856402
34.92	3.21226	0.55033	34.92	1.95223	0.995021
34.94	3.26754	0.503856	34.94	1.93798	0.841084
34.96	3.17629	0.501052	34.96	1.84279	0.764544
34.98	3.31877	0.629658	34.98	1.89546	0.750646
35	3.2357	0.893783	35	1.87396	0.749651
35.02	3.32711	0.749804	35.02	1.8683	0.837416
35.04	3.28162	1.05127	35.04	1.96127	0.771132
35.06	3.31111	0.995948	35.06	1.97329	0.740069
35.08	3.23711	0.97315	35.08	1.93603	0.716405
35.1	3.25613	0.934978	35.1	1.93886	0.643407
35.12	3.29018	0.793978	35.12	1.88992	0.618954
35.14	3.3014	0.999957	35.14	1.83024	0.799115
35.16	3.21932	0.979543	35.16	1.84493	0.789494
35.18	3.11763	0.915028	35.18	1.81049	0.688815
35.2	3.21463	0.921102	35.2	1.87423	0.775403
35.22	3.27135	0.918503	35.22	1.85296	0.624532
35.24	3.2463	0.913462	35.24	1.79776	0.855062
35.26	3.26756	0.746396	35.26	1.863	0.627588
35.28	3.2281	0.552255	35.28	1.90493	0.67796
35.3	3.27353	0.676395	35.3	1.89152	0.666115
35.32	3.22333	0.976003	35.32	1.90653	0.668647
35.34	3.23767	0.74437	35.34	1.92755	0.857426
35.36	3.22177	0.96185	35.36	1.93263	0.972187
35.38	3.1827	0.962212	35.38	1.84446	0.874277
35.4	3.21486	0.713237	35.4	1.90086	0.855629
35.42	3.14324	0.865587	35.42	1.8201	0.881113
35.44	3.17116	1.02379	35.44	1.94334	0.817984
35.46	3.16514	0.697672	35.46	1.90136	0.876444
35.48	3.19009	0.732042	35.48	1.88144	0.798473
35.5	3.20279	1.00552	35.5	1.95865	0.833573
35.52	3.22913	0.553001	35.52	1.83558	0.870134
35.54	3.23826	0.928858	35.54	1.96296	0.785063
35.56	3.25743	1.03845	35.56	1.83398	0.7774
35.58	3.17624	0.76945	35.58	1.91068	0.797912
35.6	3.31069	0.501639	35.6	1.98287	0.838081
35.62	3.26384	0.823454	35.62	1.90118	0.872915
35.64	3.22863	0.614104	35.64	1.99495	0.733479
35.66	3.18666	0.805912	35.66	1.92983	0.774134
35.68	3.13844	0.75097	35.68	2.0134	0.721616
35.7	3.23054	1.00358	35.7	1.90379	0.773568
35.72	3.25211	0.896889	35.72	1.90359	0.59324
35.74	3.2287	1.02245	35.74	1.937	0.780184
35.76	3.26939	0.551191	35.76	1.89386	0.730706
35.78	3.14833	0.570921	35.78	1.88831	0.898729
35.8	3.08711	0.57691	35.8	1.74521	0.805148
35.82	3.14447	0.947322	35.82	1.86582	0.737762
35.84	3.23417	0.95186	35.84	1.89069	0.95743
35.86	3.24754	0.725797	35.86	1.76989	0.917378
35.88	3.18056	0.701299	35.88	1.88067	0.801513
35.9	3.22253	1.02116	35.9	1.87775	0.746821
35.92	3.14159	0.969299	35.92	1.87468	0.705787
35.94	3.17841	0.960292	35.94	1.84686	0.700226
35.96	3.24881	1.00552	35.96	1.82002	0.747966
35.98	3.2459	0.919547	35.98	1.87351	0.719048
36	3.23269	0.927983	36	1.85698	0.752276
36.02	3.23384	0.737194	36.02	1.76417	0.668985
36.04	3.17678	0.639812	36.04	1.90761	0.967914
36.06	3.2767	0.693623	36.06	1.90533	0.803011
36.08	3.15924	1.01423	36.08	1.83979	0.715311
36.1	3.23901	0.948388	36.1	1.89757	0.758759
36.12	3.1383	0.933189	36.12	1.91228	0.727699
36.14	3.1356	0.979431	36.14	1.88422	0.699877
36.16	3.22598	0.743019	36.16	1.87108	0.810266
36.18	3.27881	0.95616	36.18	1.82641	0.88726
36.2	3.21324	0.960999	36.2	1.88904	0.731491
36.22	3.16912	0.98474	36.22	1.91057	0.835086
36.24	3.24741	1.03062	36.24	1.90224	0.752496
36.26	3.22048	0.985822	36.26	1.8935	0.838843
36.28	3.15028	0.535595	36.28	1.94262	0.814705
36.3	3.21381	0.517116	36.3	1.88961	0.805252
36.32	3.26088	0.998086	36.32	1.8539	0.706022
36.34	3.22818	1.03686	36.34	1.82869	0.789728
36.36	3.31416	0.718044	36.36	1.88717	0.765694
36.38	3.29578	0.543256	36.38	1.88093	0.772346
36.4	3.24778	0.722511	36.4	1.8501	0.730335
36.42	3.22708	0.973463	36.42	1.93119	0.803048
36.44	3.25564	0.488988	36.44	1.88679	0.800839
36.46	3.22708	0.505336	36.46	1.8186	0.726099
36.48	3.27736	1.02293	36.48	1.85152	0.736955
36.5	3.15491	0.601511	36.5	1.79599	0.667885
36.52	3.17555	0.71446	36.52	1.82547	0.87349
36.54	3.21938	0.779558	36.54	1.87236	0.67036
36.56	3.25949	1.00399	36.56	1.84457	0.664812
36.58	3.15428	1.06889	36.58	1.81906	0.669944
36.6	3.24005	0.695502	36.6	1.83858	0.716724
36.62	3.29231	0.703782	36.62	1.79675	0.748368
36.64	3.20687	0.516177	36.64	1.83867	0.793819
36.66	3.2174	0.472701	36.66	1.93531	1.1093
36.68	3.26788	0.735456	36.68	1.8058	0.733168
36.7	3.30172	0.697734	36.7	1.85061	0.805845
36.72	3.24768	0.544403	36.72	1.8694	0.827319
36.74	3.20045	0.956603	36.74	1.90122	0.768945
36.76	3.19309	0.961255	36.76	1.859	0.685397
36.78	3.31442	1.01685	36.78	1.8376	0.737817
36.8	3.19004	1.02103	36.8	1.83545	0.760955
36.82	3.26682	1.03883	36.82	1.86189	0.763825
36.84	3.28591	0.741483	36.84	1.83787	0.757267
36.86	3.32521	0.568027	36.86	1.89692	0.796242
36.88	3.32912	0.566074	36.88	1.87491	0.786217
36.9	3.34949	0.916455	36.9	1.8021	0.732682
36.92	3.30342	0.983403	36.92	1.92971	0.879607
36.94	3.29844	0.518421	36.94	1.94762	0.977657
36.96	3.27445	0.764876	36.96	1.82173	0.894077
36.98	3.24381	0.750347	36.98	1.93158	0.918302
37	3.30679	0.681839	37	1.89154	0.744608
37.02	3.21973	0.746541	37.02	1.80698	0.788191
37.04	3.2037	0.56566	37.04	1.94772	0.758356
37.06	3.28269	0.706124	37.06	1.91968	0.733024
37.08	3.33869	0.984239	37.08	1.91615	0.822637
37.1	3.28117	0.584502	37.1	1.92552	0.839956
37.12	3.2775	0.547689	37.12	1.83418	0.771418
37.14	3.27305	0.616442	37.14	1.88921	0.721418
37.16	3.26189	0.947054	37.16	1.88387	0.651659
37.18	3.24846	1.01765	37.18	1.87591	0.669802
37.2	3.20244	0.743135	37.2	1.81647	0.82694
37.22	3.2238	0.771369	37.22	1.81708	0.767318
37.24	3.21284	0.96571	37.24	1.75817	0.810966
37.26	3.25782	0.963896	37.26	1.83821	0.785505
37.28	3.2905	1.04269	37.28	1.77977	0.719153
37.3	3.26783	1.0159	37.3	1.82981	0.763187
37.32	3.22235	0.94801	37.32	1.78745	0.675213
37.34	3.21371	0.715718	37.34	1.82682	0.793512
37.36	3.29333	0.754517	37.36	1.79714	0.832337
37.38	3.22056	0.672932	37.38	1.72191	0.672706
37.4	3.26167	0.785439	37.4	1.75429	0.710122
37.42	3.2423	0.747223	37.42	1.71424	0.795794
37.44	3.27636	0.760907	37.44	1.80871	0.804047
37.46	3.22832	0.746523	37.46	1.81772	0.707202
37.48	3.34204	0.699208	37.48	1.81352	0.798097
37.5	3.35059	0.753349	37.5	1.77319	0.698175
37.52	3.37401	0.783966	37.52	1.78971	0.742302
37.54	3.24691	1.00603	37.54	1.81617	0.802811
37.56	3.22405	0.521755	37.56	1.7338	0.779275
37.58	3.22073	0.500573	37.58	1.81816	0.611372
37.6	3.22259	0.646894	37.6	1.86492	0.87646
37.62	3.253	0.841311	37.62	1.82763	0.880369
37.64	3.19699	1.01662	37.64	1.78557	0.757375
37.66	3.20174	0.992158	37.66	1.88743	0.815813
37.68	3.18693	0.713557	37.68	1.79699	0.847677
37.7	3.07752	0.683637	37.7	1.85774	0.642958
37.72	3.27484	0.752782	37.72	1.84782	0.740951
37.74	3.30459	1.03103	37.74	1.81753	0.727023
37.76	3.29099	0.990985	37.76	1.86913	0.678647
37.78	3.23676	0.979303	37.78	1.89301	0.897783
37.8	3.16023	0.742804	37.8	1.85796	0.754787
37.82	3.20117	0.829897	37.82	1.74979	0.861804
37.84	3.1161	0.523638	37.84	1.79721	0.671525
37.86	3.21081	0.613345	37.86	1.74156	0.771579
37.88	3.18314	0.525021	37.88	1.80072	0.659194
37.9	3.22503	0.561522	37.9	1.81648	0.788995
37.92	3.14513	0.759398	37.92	1.84047	0.774099
37.94	3.14772	0.999552	37.94	1.82418	0.734649
37.96	3.19702	0.954577	37.96	1.79653	0.839604
37.98	3.26138	1.05289	37.98	1.81582	0.966868
38	3.26951	0.937877	38	1.86586	1.11854
38.02	3.21185	0.99917	38.02	1.81741	0.732842
38.04	3.18394	1.02382	38.04	1.79018	0.650087
38.06	3.22026	0.951966	38.06	1.83807	0.705674
38.08	3.14313	0.960271	38.08	1.88745	0.710913
38.1	3.18591	0.938766	38.1	1.88454	0.679654
38.12	3.28142	0.978529	38.12	1.83543	0.877422
38.14	3.29461	0.784105	38.14	1.87223	0.696331
38.16	3.18137	0.750593	38.16	1.8823	0.830454
38.18	3.26223	0.977903	38.18	1.90305	0.826887
38.2	3.15571	1.01135	38.2	1.96794	0.79771
38.22	3.24019	1.00188	38.22	1.94004	0.719279
38.24	3.16693	1.02457	38.24	1.91659	0.808592
38.26	3.24766	0.553355	38.26	1.96191	0.704519
38.28	3.16907	0.986003	38.28	1.81664	0.815981
38.3	3.17046	0.970569	38.3	1.88719	0.747619
38.32	3.18669	1.01817	38.32	1.90759	0.673348
38.34	3.24202	0.626732	38.34	1.92931	0.745158
38.36	3.20368	0.889506	38.36	1.8849	0.765697
38.38	3.27736	0.723252	38.38	1.95108	0.716613
38.4	3.18923	0.66377	38.4	1.88326	0.699526
38.42	3.1905	0.810902	38.42	1.85225	0.561778
38.44	3.15384	1.04852	38.44	1.90821	0.807661
38.46	3.12923	0.78199	38.46	1.91807	0.786124
38.48	3.21811	0.719258	38.48	1.8514	0.715835
38.5	3.10461	0.988147	38.5	1.88078	0.683194
38.52	3.2108	0.967941	38.52	1.89306	0.863736
38.54	3.16218	0.521779	38.54	1.86993	0.825411
38.56	3.25206	0.997656	38.56	1.88825	0.805317
38.58	3.23281	0.967997	38.58	1.85935	0.863216
38.6	3.25487	0.735294	38.6	1.85641	0.692722
38.62	3.262	0.715126	38.62	1.92785	0.855212
38.64	3.2738	0.533707	38.64	1.93118	0.800156
38.66	3.32631	0.736749	38.66	1.92612	0.771198
38.68	3.35632	0.978235	38.68	1.91263	0.795039
38.7	3.33042	0.984513	38.7	1.94039	0.711939
38.72	3.27565	0.909587	38.72	1.96617	0.833361
38.74	3.26583	0.757869	38.74	1.97828	0.806801
38.76	3.24159	0.607494	38.76	1.84616	0.743421
38.78	3.23214	0.533146	38.78	1.9797	0.792371
38.8	3.23274	0.701703	38.8	1.94487	0.821762
38.82	3.16371	0.914326	38.82	1.97505	0.710615
38.84	3.19634	0.945453	38.84	1.76655	0.687552
38.86	3.22929	0.948888	38.86	1.87187	0.666857
38.88	3.21781	0.717132	38.88	1.86493	0.788895
38.9	3.28337	0.859787	38.9	1.79861	0.608499
38.92	3.18107	0.532521	38.92	1.88442	0.797563
38.94	3.23153	0.71093	38.94	1.95095	0.797113
38.96	3.25641	0.708309	38.96	1.81505	0.843056
38.98	3.21923	0.701781	38.98	1.88522	0.764503
39	3.20968	0.9632	39	1.87328	0.813053
39.02	3.22857	0.741934	39.02	1.96255	0.806845
39.04	3.22043	0.714673	39.04	1.90697	0.749057
39.06	3.25997	0.63272	39.06	1.93876	0.791663
39.08	3.19587	0.6727	39.08	1.85799	0.666936
39.1	3.21551	0.728336	39.1	1.88615	0.807834
39.12	3.226	0.795199	39.12	1.91932	0.711152
39.14	3.12495	0.748954	39.14	1.83592	0.749645
39.16	3.27865	0.482083	39.16	1.86667	0.784562
39.18	3.20537	0.741924	39.18	1.84256	0.603864
39.2	3.15925	0.693466	39.2	1.89972	0.804152
39.22	3.1291	0.736341	39.22	1.90998	0.651116
39.24	3.15269	0.710857	39.24	1.90032	0.782246
39.26	3.24751	0.585359	39.26	1.89614	0.571104
39.28	3.33331	0.659107	39.28	1.9112	0.793377
39.3	3.27011	0.952029	39.3	1.843	0.681564
39.32	3.34118	0.904668	39.32	1.86211	0.758313
39.34	3.34709	1.04244	39.34	1.84788	0.839207
39.36	3.31922	0.97933	39.36	1.86563	0.800924
39.38	3.31134	0.983759	39.38	1.90818	0.831047
39.4	3.26128	0.955402	39.4	1.86872	0.793161
39.42	3.33011	0.752501	39.42	1.87325	0.825125
39.44	3.32326	0.729828	39.44	1.89787	0.943504
39.46	3.34725	0.702091	39.46	1.90165	0.722739
39.48	3.36574	0.999641	39.48	1.93896	0.885592
39.5	3.25556	0.781095	39.5	1.86718	0.697125
39.52	3.31601	0.888552	39.52	1.87802	0.752423
39.54	3.2487	0.70404	39.54	1.85932	1.06174
39.56	3.25659	0.686748	39.56	1.88952	0.855808
39.58	3.2206	0.685956	39.58	1.77198	0.686987
39.6	3.25706	0.70493	39.6	1.85726	0.653634
39.62	3.2589	0.968811	39.62	1.79805	0.576067
39.64	3.20942	1.00861	39.64	1.79375	0.692699
39.66	3.22262	0.731395	39.66	1.78076	0.753293
39.68	3.25131	0.816472	39.68	1.78092	0.754994
39.7	3.22475	1.03995	39.7	1.81743	0.689301
39.72	3.27435	0.957873	39.72	1.78935	0.805141
39.74	3.13925	0.957185	39.74	1.85102	0.821235
39.76	3.24157	0.579949	39.76	1.94583	0.764614
39.78	3.22037	0.712348	39.78	1.87002	0.852567
39.8	3.13358	0.929514	39.8	1.79077	0.88155
39.82	3.20891	0.961966	39.82	1.82031	0.705354
39.84	3.20975	0.994789	39.84	1.80725	0.788017
39.86	3.19435	0.736228	39.86	1.85702	0.830074
39.88	3.18256	0.750092	39.88	1.82403	0.733745
39.9	3.2529	0.865667	39.9	1.8951	0.74991
39.92	3.14564	0.723843	39.92	1.92115	0.685204
39.94	3.21995	0.677064	39.94	1.88712	0.791256
39.96	3.16145	0.719388	39.96	1.85995	0.734191
39.98	3.22532	0.657914	39.98	1.97192	0.81946
[truncated: 502 more rows]

## Sheet: Isavuconazole
Time (ns)	protein_ARG1	LIG_Isavuconazole	Time (ns)	protein_ARG2	LIG_Isavuconazole
0.02	0.722111	0.667688	0.02	0.700892	0.536464
0.04	0.731239	0.380152	0.04	0.819216	0.772957
0.06	0.81984	0.637922	0.06	0.808488	0.463845
0.08	0.901897	0.865619	0.08	0.797651	0.520437
0.1	0.942382	0.662114	0.1	0.768299	0.436647
0.12	0.939387	0.756116	0.12	0.805874	1.0165
0.14	1.16558	1.00363	0.14	0.868515	0.576735
0.16	1.17086	1.36947	0.16	0.787078	0.346414
0.18	1.10658	0.896783	0.18	0.822164	0.906609
0.2	1.21556	0.586877	0.2	0.92027	1.19718
0.22	1.40441	0.946727	0.22	0.804919	1.21199
0.24	1.56453	1.243	0.24	0.899399	1.15527
0.26	1.47792	0.36817	0.26	0.863644	1.13389
0.28	1.43821	0.851824	0.28	0.927812	1.08282
0.3	1.43966	0.844951	0.3	0.969841	1.25499
0.32	1.52755	0.999315	0.32	0.965802	1.03383
0.34	1.66689	0.713159	0.34	0.973507	1.19114
0.36	1.7808	0.601542	0.36	1.06294	0.864566
0.38	1.73964	0.711988	0.38	1.08883	0.843399
0.4	1.86625	0.480106	0.4	1.1263	0.951686
0.42	1.91283	1.51357	0.42	1.14658	1.47312
0.44	1.84341	1.28548	0.44	1.15824	1.3662
0.46	1.59762	1.48956	0.46	1.09829	1.23332
0.48	1.66601	1.43016	0.48	1.08151	1.62992
0.5	1.76734	1.42068	0.5	1.12466	1.35732
0.52	1.70086	1.29812	0.52	1.19943	0.933754
0.54	1.66199	1.42409	0.54	1.10954	1.03603
0.56	1.75485	1.58219	0.56	1.16311	1.49702
0.58	1.66641	1.56011	0.58	1.17547	1.48464
0.6	1.70446	1.4374	0.6	1.16075	1.00582
0.62	1.68494	1.53555	0.62	1.12275	1.68055
0.64	1.76683	1.43993	0.64	1.13568	1.73964
0.66	1.77952	1.38084	0.66	1.10787	1.73002
0.68	1.82037	1.46162	0.68	1.24339	1.7159
0.7	1.92661	1.58952	0.7	1.20689	1.71677
0.72	1.80406	1.54248	0.72	1.25378	1.724
0.74	1.83119	1.59868	0.74	1.27382	1.75318
0.76	1.91154	1.71519	0.76	1.32696	1.71422
0.78	1.66365	1.52396	0.78	1.35502	1.61705
0.8	1.7091	1.39046	0.8	1.34907	1.43021
0.82	1.67663	1.39104	0.82	1.36083	1.39536
0.84	1.67449	1.34025	0.84	1.29851	0.654775
0.86	1.76242	1.52779	0.86	1.37911	0.587392
0.88	1.83098	1.47109	0.88	1.4632	0.429078
0.9	1.92886	1.57607	0.9	1.45082	0.478775
0.92	1.80565	1.17089	0.92	1.31764	0.766273
0.94	1.88119	0.59195	0.94	1.36407	0.692297
0.96	1.90632	0.739262	0.96	1.40431	0.620509
0.98	1.99255	0.806928	0.98	1.37907	1.45456
1	1.9845	0.895374	1	1.41239	1.02957
1.02	2.20974	0.944456	1.02	1.26782	0.993402
1.04	2.34953	0.831755	1.04	1.31342	1.07532
1.06	2.25997	0.857049	1.06	1.38167	0.997801
1.08	2.32039	0.908532	1.08	1.39325	1.43205
1.1	2.23523	0.805421	1.1	1.25014	1.22035
1.12	2.0868	0.670076	1.12	1.24662	1.08218
1.14	2.21549	0.691437	1.14	1.33023	1.64968
1.16	2.12804	0.736811	1.16	1.27522	1.71476
1.18	2.18546	0.94127	1.18	1.32301	1.51687
1.2	2.19949	0.790727	1.2	1.29891	1.41787
1.22	2.33243	0.9172	1.22	1.3685	1.40735
1.24	2.34699	0.630006	1.24	1.46697	1.3222
1.26	2.21129	0.915208	1.26	1.43258	0.58749
1.28	2.18517	0.95869	1.28	1.37476	0.997471
1.3	2.11946	0.690384	1.3	1.56991	0.884836
1.32	2.2932	0.699774	1.32	1.54094	1.023
1.34	2.51543	1.13023	1.34	1.77323	1.03873
1.36	2.28494	1.18805	1.36	1.60566	1.11203
1.38	2.47334	1.16508	1.38	1.5918	0.994478
1.4	2.23588	1.16815	1.4	1.70048	1.09822
1.42	2.24096	1.02026	1.42	1.73788	1.08072
1.44	2.20069	1.03599	1.44	1.80114	1.25655
1.46	2.15179	1.12029	1.46	1.73005	1.8856
1.48	2.31946	0.923365	1.48	1.62667	1.70984
1.5	2.67124	0.754431	1.5	1.52223	1.55237
1.52	2.49844	0.784767	1.52	1.52411	1.19219
1.54	2.49728	0.825211	1.54	1.66779	1.84337
1.56	2.40407	0.953365	1.56	1.68301	2.09124
1.58	2.33134	0.833772	1.58	1.63845	1.96228
1.6	2.42878	1.32084	1.6	1.72539	2.07854
1.62	2.50392	1.47787	1.62	1.64974	2.28724
1.64	2.28297	1.35853	1.64	1.90262	2.23521
1.66	2.42624	1.41105	1.66	1.75992	2.2792
1.68	2.3783	1.49936	1.68	1.74502	2.29138
1.7	2.44604	1.40684	1.7	1.74251	2.22293
1.72	2.52443	1.20398	1.72	1.75934	2.61631
1.74	2.73752	1.48822	1.74	1.73569	2.34632
1.76	2.82641	1.4735	1.76	1.75453	2.49653
1.78	2.67033	1.55465	1.78	1.76214	2.44653
1.8	2.69651	1.57661	1.8	1.64668	2.59711
1.82	2.55952	1.70799	1.82	1.70287	2.40627
1.84	2.60931	1.49166	1.84	1.78089	2.28963
1.86	2.43045	1.49152	1.86	1.61557	2.69421
1.88	2.41834	1.46963	1.88	1.62837	2.82018
1.9	2.53024	0.477258	1.9	1.71692	2.65774
1.92	2.55612	0.753929	1.92	1.78496	2.5986
1.94	2.55525	0.760193	1.94	1.71197	2.61024
1.96	2.8429	0.562778	1.96	1.6743	2.53624
1.98	2.8568	0.733404	1.98	1.59316	2.63183
2	2.87142	0.747771	2	1.62829	2.65999
2.02	2.54322	1.0534	2.02	1.62947	2.52194
2.04	2.5985	0.891894	2.04	1.53373	2.50636
2.06	2.27103	0.796789	2.06	1.66883	2.65546
2.08	2.51117	0.85268	2.08	1.65969	2.58699
2.1	2.18598	0.924962	2.1	1.74785	2.53257
2.12	2.11607	0.561613	2.12	1.7002	2.61295
2.14	2.03697	0.683557	2.14	1.56594	2.72809
2.16	2.14289	0.679753	2.16	1.66185	2.48563
2.18	2.21664	1.57371	2.18	1.71398	2.57722
2.2	2.14019	1.63895	2.2	1.68577	2.5101
2.22	2.14305	1.4244	2.22	1.68528	2.43765
2.24	2.19653	1.60532	2.24	1.57406	2.45146
2.26	2.22073	1.57702	2.26	1.64116	2.47245
2.28	2.12156	0.710763	2.28	1.73981	2.24696
2.3	1.99246	0.725618	2.3	1.84786	2.64911
2.32	2.0308	0.666472	2.32	1.73743	2.34315
2.34	2.21537	0.944189	2.34	1.72593	2.60246
2.36	2.06399	0.782892	2.36	1.77531	2.57948
2.38	2.14188	0.356057	2.38	1.77417	2.44566
2.4	2.12461	0.667045	2.4	1.78526	2.44283
2.42	2.20029	0.611084	2.42	1.74882	2.32649
2.44	1.9513	0.802942	2.44	1.70033	2.41254
2.46	2.04737	0.801827	2.46	1.70432	2.62364
2.48	1.93445	1.46734	2.48	1.67487	2.18105
2.5	2.0218	1.48705	2.5	1.72181	2.39353
2.52	1.93516	1.60863	2.52	1.75613	2.22251
2.54	1.97471	1.41546	2.54	1.87451	2.39695
2.56	2.03452	1.56791	2.56	1.79045	2.22319
2.58	2.0525	1.04504	2.58	1.77363	2.14436
2.6	2.10145	0.613877	2.6	1.77376	2.33835
2.62	2.20596	0.949226	2.62	1.80769	2.71756
2.64	2.17875	1.06308	2.64	1.75497	2.37842
2.66	2.19394	0.662699	2.66	1.69279	2.13372
2.68	2.21569	1.22216	2.68	1.78523	2.57046
2.7	2.12794	0.770907	2.7	1.79429	2.35637
2.72	2.0621	0.938749	2.72	1.74787	2.40258
2.74	1.91159	0.807615	2.74	1.77621	2.24024
2.76	2.00054	1.06191	2.76	1.77429	2.25673
2.78	1.98474	0.819732	2.78	1.78529	2.33027
2.8	1.8174	0.602932	2.8	1.9348	2.35051
2.82	2.00305	0.801526	2.82	1.80626	2.46052
2.84	2.06269	1.63623	2.84	1.89516	2.59172
2.86	2.09862	1.55074	2.86	1.99594	2.57584
2.88	2.01681	1.44163	2.88	1.89589	2.59546
2.9	1.87615	1.67191	2.9	1.82041	2.60566
2.92	1.95348	1.49647	2.92	1.94333	2.61735
2.94	2.00793	1.55962	2.94	2.08042	2.42648
2.96	2.08617	1.44159	2.96	1.82417	2.49523
2.98	2.12107	1.43453	2.98	1.83879	2.64849
3	2.23258	1.47657	3	1.78849	2.54796
3.02	2.14462	1.48271	3.02	1.90948	2.34556
3.04	2.01237	0.87533	3.04	1.96788	2.43489
3.06	1.83188	0.756294	3.06	1.92746	2.50103
3.08	1.78229	1.49044	3.08	1.78854	2.49941
3.1	1.95277	1.41096	3.1	1.93758	2.55783
3.12	1.90309	1.43614	3.12	1.94162	2.42652
3.14	1.9852	1.37546	3.14	1.93462	2.4498
3.16	2.16715	1.49965	3.16	1.87261	2.31202
3.18	2.16658	1.34721	3.18	1.86226	2.56419
3.2	2.04012	1.46947	3.2	1.87194	2.63997
3.22	2.08009	1.30832	3.22	1.91073	2.56733
3.24	2.28312	1.40601	3.24	1.81736	2.36531
3.26	2.34631	1.51531	3.26	1.81281	2.4003
3.28	2.59723	1.41519	3.28	1.91065	2.51846
3.3	2.57595	1.51016	3.3	1.98758	2.44522
3.32	2.80527	1.24072	3.32	1.91385	2.74714
3.34	2.99668	1.29526	3.34	1.92971	2.17634
3.36	3.05927	1.35402	3.36	1.85581	2.43514
3.38	3.14657	0.972346	3.38	1.78487	2.57003
3.4	3.25693	1.18904	3.4	1.90576	2.46563
3.42	2.97318	0.577529	3.42	1.76061	2.53279
3.44	2.95689	1.50664	3.44	1.72861	2.48086
3.46	3.21171	1.54756	3.46	1.76822	2.51625
3.48	3.25899	1.50563	3.48	1.75529	2.55752
3.5	3.1353	1.43653	3.5	1.87504	2.38878
3.52	3.14283	1.44516	3.52	1.79241	2.55547
3.54	3.04723	1.38699	3.54	1.77915	2.4785
3.56	2.94833	1.60978	3.56	1.67968	2.41792
3.58	3.19262	1.5758	3.58	1.69273	2.34887
3.6	3.21962	1.277	3.6	1.59191	2.22197
3.62	3.21287	1.40472	3.62	1.70051	2.67674
3.64	3.07829	1.40188	3.64	1.7937	2.19685
3.66	3.12402	1.43165	3.66	1.66933	2.27194
3.68	3.12997	0.797307	3.68	1.71923	2.78874
3.7	3.26097	0.731312	3.7	1.75573	2.70336
3.72	3.00533	0.635789	3.72	1.76549	2.62487
3.74	2.96141	0.972567	3.74	1.73983	2.39352
3.76	3.00434	1.08531	3.76	1.72887	2.56991
3.78	2.75541	1.78692	3.78	1.83743	2.34701
3.8	2.89188	1.61143	3.8	1.76039	2.81098
3.82	3.0088	1.62074	3.82	1.79218	2.3926
3.84	2.99747	1.43194	3.84	1.6991	2.50408
3.86	3.04281	1.49247	3.86	1.64099	2.61021
3.88	2.83619	0.805518	3.88	1.90281	2.13942
3.9	2.80157	0.820731	3.9	1.6956	2.34469
3.92	2.91839	0.572888	3.92	1.71248	2.33036
3.94	2.84881	0.639354	3.94	1.84915	2.23172
3.96	2.9376	0.812439	3.96	1.91735	2.17976
3.98	2.93593	0.818345	3.98	1.8485	2.09087
4	2.98201	0.693978	4	1.78664	2.05972
4.02	2.95254	1.54802	4.02	1.68865	2.2567
4.04	3.05107	1.53978	4.04	1.69071	2.30087
4.06	2.85769	1.38233	4.06	1.73204	2.25833
4.08	2.73837	2.00904	4.08	1.78365	2.39029
4.1	2.76201	1.36487	4.1	1.84613	2.51079
4.12	2.67518	0.75487	4.12	1.91423	2.25395
4.14	2.80026	0.744184	4.14	1.76113	2.51667
4.16	2.71209	0.836979	4.16	1.84403	2.24834
4.18	2.8192	0.657028	4.18	1.758	2.34347
4.2	2.67176	0.629133	4.2	1.83072	2.32971
4.22	2.80631	0.647295	4.22	1.84378	2.30996
4.24	2.6735	0.774638	4.24	1.72695	2.33546
4.26	2.64478	0.841939	4.26	1.76807	2.30337
4.28	2.59875	0.911978	4.28	1.80477	2.2103
4.3	2.53884	1.06886	4.3	1.72697	2.33051
4.32	2.55324	0.702912	4.32	1.69323	2.30625
4.34	2.48288	1.06331	4.34	1.77329	2.23199
4.36	2.42336	0.92434	4.36	1.74658	2.51692
4.38	2.60005	1.16145	4.38	1.75723	2.37603
4.4	2.50472	0.966326	4.4	1.85664	2.52042
4.42	2.33449	0.927518	4.42	1.78171	2.44774
4.44	2.47123	0.778321	4.44	1.8488	2.57376
4.46	2.37171	0.63577	4.46	1.89064	2.4348
4.48	2.37098	0.841293	4.48	1.94282	2.23875
4.5	2.48466	1.10504	4.5	1.82707	2.02695
4.52	2.36434	0.595782	4.52	1.82594	2.23119
4.54	2.53442	1.03412	4.54	1.80549	2.10524
4.56	2.55547	1.02337	4.56	1.83761	2.27008
4.58	2.43238	1.29137	4.58	1.87007	2.49937
4.6	2.66717	1.10604	4.6	1.8318	2.53142
4.62	2.71919	1.01171	4.62	1.83614	2.52648
4.64	2.58722	0.8872	4.64	1.79644	2.37987
4.66	2.66744	1.03524	4.66	1.85943	2.28778
4.68	2.855	0.904172	4.68	1.94455	2.37297
4.7	2.90614	0.773776	4.7	1.86143	2.16188
4.72	3.00595	1.04103	4.72	2.06545	2.20971
4.74	2.97508	1.30267	4.74	2.0207	2.45012
4.76	2.89914	1.11834	4.76	1.93803	2.38028
4.78	2.81642	1.10093	4.78	1.9372	2.36505
4.8	2.7729	1.01448	4.8	1.82947	2.21718
4.82	2.76216	1.54492	4.82	1.81679	2.16099
4.84	2.91193	1.87706	4.84	1.87779	2.44755
4.86	3.20815	1.80691	4.86	2.0102	2.4043
4.88	3.09167	1.74927	4.88	1.82679	2.18277
4.9	3.02404	1.9867	4.9	1.84034	2.32523
4.92	3.03984	1.79513	4.92	1.88	2.21519
4.94	2.92672	1.26591	4.94	1.91505	2.21333
4.96	2.92162	1.20462	4.96	1.77677	2.08843
4.98	2.89172	1.14517	4.98	1.81939	2.16148
5	2.97506	1.07523	5	1.80619	2.27191
5.02	3.01017	1.79297	5.02	1.78126	2.04324
5.04	2.90496	1.66024	5.04	1.88505	2.15247
5.06	2.97768	1.7368	5.06	1.92258	2.29066
5.08	2.96339	1.61837	5.08	1.99837	2.23927
5.1	2.69122	1.75097	5.1	1.85287	2.19967
5.12	2.82066	1.62592	5.12	1.89045	2.23178
5.14	2.91974	1.49183	5.14	1.96022	2.19805
5.16	2.92986	1.76884	5.16	1.97322	1.87565
5.18	3.20889	1.67902	5.18	1.96875	2.22579
5.2	3.16692	1.44809	5.2	1.8076	2.35649
5.22	3.35229	2.09704	5.22	1.92111	2.081
5.24	3.51345	2.18248	5.24	1.8301	2.07759
5.26	3.62748	2.16623	5.26	1.93445	2.2067
5.28	3.55513	2.32422	5.28	1.73623	2.18554
5.3	3.52924	2.36993	5.3	1.8048	2.20656
5.32	3.43792	2.44853	5.32	1.91602	2.21127
5.34	3.68798	2.47566	5.34	1.94756	2.22025
5.36	3.46087	2.01601	5.36	1.81678	2.08591
5.38	3.28615	2.26536	5.38	1.7782	2.34346
5.4	3.2164	2.21112	5.4	1.84609	2.15769
5.42	3.12358	2.22657	5.42	1.84694	2.28287
5.44	3.28861	2.08342	5.44	1.90316	2.22864
5.46	3.02217	2.24508	5.46	1.84895	2.22533
5.48	3.12409	2.43461	5.48	1.89812	2.06178
5.5	2.98413	2.47589	5.5	1.83664	2.49927
5.52	2.95374	2.08388	5.52	1.8793	2.13762
5.54	3.0828	2.49669	5.54	1.84966	2.0876
5.56	3.00476	2.15914	5.56	1.97204	1.98733
5.58	3.02778	2.32045	5.58	1.95322	2.38548
5.6	3.04923	2.34241	5.6	2.0215	2.01176
5.62	2.94391	2.10135	5.62	2.02456	2.40292
5.64	2.70869	2.30476	5.64	1.95317	1.92509
5.66	2.67044	2.30577	5.66	1.99246	2.12184
5.68	2.67877	2.3561	5.68	2.06586	2.15813
5.7	2.75961	2.25421	5.7	1.94131	2.25077
5.72	2.80259	2.13204	5.72	2.07308	2.40655
5.74	2.53375	2.47514	5.74	2.05518	2.36007
5.76	2.61681	2.33027	5.76	2.1311	2.22236
5.78	2.65467	2.32123	5.78	2.1768	2.29763
5.8	2.73453	2.40523	5.8	2.16965	2.06589
5.82	2.77139	2.39761	5.82	2.05595	2.22015
5.84	2.565	2.28304	5.84	2.01971	2.11108
5.86	2.72532	2.23695	5.86	1.95497	2.1624
5.88	2.75545	2.436	5.88	2.03044	2.25302
5.9	2.78248	2.32777	5.9	2.01817	2.371
5.92	2.82516	2.20217	5.92	1.95708	2.26705
5.94	2.95877	2.31696	5.94	1.81072	2.39295
5.96	2.8462	2.25113	5.96	1.84769	2.39076
5.98	2.94863	2.34699	5.98	1.78553	2.42067
6	2.84547	2.50149	6	1.93338	2.12124
6.02	2.9117	2.46845	6.02	1.78734	2.41583
6.04	2.68863	2.5955	6.04	1.82031	2.35582
6.06	2.68465	2.62411	6.06	1.80516	2.31574
6.08	2.92345	2.55375	6.08	1.89729	2.20794
6.1	2.99271	2.58535	6.1	1.83137	2.26626
6.12	2.88969	2.58187	6.12	1.88958	2.5645
6.14	3.05002	2.58398	6.14	1.81605	2.28962
6.16	3.08164	2.85141	6.16	1.84132	2.33519
6.18	3.12764	2.4705	6.18	1.82537	2.20897
6.2	3.19043	2.64144	6.2	1.85299	2.21557
6.22	3.18716	2.76186	6.22	1.87479	2.55422
6.24	3.15141	2.52226	6.24	1.94054	2.16263
6.26	3.17934	2.42012	6.26	1.87615	2.38986
6.28	3.16193	2.74719	6.28	2.0213	2.41472
6.3	3.27429	2.67542	6.3	1.82671	2.61786
6.32	3.21933	2.11347	6.32	1.7355	2.60402
6.34	3.31697	2.40686	6.34	1.75444	2.31879
6.36	3.09502	2.64057	6.36	1.72339	2.46092
6.38	3.19921	2.29244	6.38	1.74188	2.26888
6.4	3.39004	2.47881	6.4	1.77285	2.16273
6.42	3.29184	2.25928	6.42	1.8896	2.35075
6.44	3.27724	2.44506	6.44	1.86254	2.39157
6.46	3.47631	2.63365	6.46	1.84091	2.07407
6.48	3.30267	2.58155	6.48	1.80866	2.37039
6.5	3.28744	2.46254	6.5	1.83211	2.32725
6.52	3.23739	2.60071	6.52	1.75856	2.38558
6.54	3.28634	2.65782	6.54	1.79983	2.44357
6.56	3.18293	2.42719	6.56	1.76492	2.43648
6.58	2.94143	2.40415	6.58	1.77197	2.31861
6.6	2.99185	2.45653	6.6	1.7995	2.09333
6.62	2.92869	2.28708	6.62	1.78019	2.34203
6.64	2.96295	2.52349	6.64	1.81759	2.17014
6.66	3.00834	2.54729	6.66	1.73233	2.32029
6.68	3.17888	2.3874	6.68	1.71167	2.3763
6.7	3.19623	2.30885	6.7	1.77229	2.33617
6.72	3.2263	2.54047	6.72	1.70675	2.39744
6.74	3.12254	2.40157	6.74	1.73452	2.21756
6.76	3.02816	2.28846	6.76	1.69487	2.21444
6.78	3.1022	2.39313	6.78	1.81031	2.02945
6.8	3.26688	2.52949	6.8	1.71292	2.43314
6.82	3.11704	2.51493	6.82	1.70266	2.22405
6.84	3.06953	2.51697	6.84	1.77702	2.1684
6.86	3.01191	2.52062	6.86	1.80748	2.16771
6.88	2.96652	2.48067	6.88	1.75945	2.2915
6.9	2.99777	2.52741	6.9	1.85981	2.34178
6.92	2.96691	2.22912	6.92	1.78616	2.1437
6.94	2.97419	2.54996	6.94	1.74394	2.39361
6.96	2.79692	2.56849	6.96	1.79054	2.17431
6.98	2.97311	2.54505	6.98	1.76852	2.27183
7	3.06828	2.58339	7	1.82297	2.23326
7.02	2.97308	2.34454	7.02	1.83127	2.17324
7.04	3.02962	2.04246	7.04	1.83503	2.29368
7.06	3.01586	2.29341	7.06	1.79845	2.28908
7.08	2.92635	2.32426	7.08	1.7896	2.39578
7.1	2.98559	2.1737	7.1	1.743	2.45068
7.12	2.7566	2.31884	7.12	1.68715	2.11225
7.14	2.8339	2.11987	7.14	1.5718	2.29133
7.16	2.6804	2.09034	7.16	1.70119	2.19733
7.18	2.54312	2.32731	7.18	1.78954	2.22087
7.2	2.59399	2.02902	7.2	1.78358	2.3006
7.22	2.49602	2.47731	7.22	1.77957	2.20608
7.24	2.48559	2.29963	7.24	1.77948	2.39504
7.26	2.42059	2.36235	7.26	1.76227	2.39612
7.28	2.57069	2.46468	7.28	1.71118	2.1605
7.3	2.43824	2.38893	7.3	1.71872	2.51919
7.32	2.53119	2.16984	7.32	1.80902	2.36691
7.34	2.48815	2.2119	7.34	1.73647	2.44401
7.36	2.49119	2.49982	7.36	1.6848	2.20224
7.38	2.59957	2.45694	7.38	1.79777	2.45236
7.4	2.54816	2.37335	7.4	1.71222	2.08695
7.42	2.6622	2.13498	7.42	1.60225	2.43941
7.44	2.74286	2.18101	7.44	1.70464	2.31965
7.46	2.70963	2.40253	7.46	1.75705	2.22011
7.48	2.96755	2.42651	7.48	1.62559	2.339
7.5	2.52916	2.28091	7.5	1.64195	2.20231
7.52	2.45754	2.36112	7.52	1.70437	2.23935
7.54	2.49981	2.27951	7.54	1.56291	2.43896
7.56	2.59718	2.45273	7.56	1.65253	2.20499
7.58	2.572	2.14616	7.58	1.70158	2.15123
7.6	2.48386	2.29666	7.6	1.70114	2.21804
7.62	2.59217	2.41508	7.62	1.57196	2.26642
7.64	2.65264	2.29201	7.64	1.58801	2.28225
7.66	2.64974	2.07889	7.66	1.63923	2.36256
7.68	2.44971	2.1634	7.68	1.68715	2.04692
7.7	2.34727	2.21266	7.7	1.68528	2.23835
7.72	2.49998	2.51644	7.72	1.69995	2.17916
7.74	2.53303	2.36864	7.74	1.73725	2.47324
7.76	2.58464	2.30116	7.76	1.76166	2.11053
7.78	2.68967	2.10355	7.78	1.70437	2.05564
7.8	2.43191	2.285	7.8	1.77874	2.26497
7.82	2.36915	2.21628	7.82	1.77694	2.2214
7.84	2.38906	2.34395	7.84	1.75728	2.36733
7.86	2.28322	2.58099	7.86	1.7664	2.24817
7.88	2.23418	2.15223	7.88	1.80073	2.60734
7.9	2.35203	2.42648	7.9	1.85049	2.31723
7.92	2.22603	2.37231	7.92	1.80931	2.44476
7.94	2.35228	2.33659	7.94	1.88117	2.21533
7.96	2.48882	2.19616	7.96	1.77972	2.19149
7.98	2.34882	2.18643	7.98	1.84114	2.48242
8	2.37141	2.37185	8	1.8806	2.38238
8.02	2.31954	2.31253	8.02	1.79957	2.57185
8.04	2.16699	2.47401	8.04	1.85751	2.25313
8.06	2.37259	2.22235	8.06	1.70011	2.63209
8.08	2.46907	2.13765	8.08	1.63147	2.50887
8.1	2.46806	2.33734	8.1	1.823	2.27016
8.12	2.41942	2.49999	8.12	1.79994	2.51983
8.14	2.28587	2.42591	8.14	1.73667	2.47078
8.16	2.41743	2.1669	8.16	1.76195	2.31431
8.18	2.37678	2.04291	8.18	1.85464	2.47752
8.2	2.44041	2.46689	8.2	1.71191	2.68512
8.22	2.30648	2.09334	8.22	1.76051	2.39496
8.24	2.51627	2.2083	8.24	1.74697	2.2506
8.26	2.52269	2.2284	8.26	1.75873	2.30703
8.28	2.59183	2.20438	8.28	1.71412	2.2042
8.3	2.59753	2.52066	8.3	1.66842	2.13211
8.32	2.48261	2.49397	8.32	1.70979	2.46401
8.34	2.67115	2.36525	8.34	1.69651	2.48241
8.36	2.68047	2.39216	8.36	1.74868	2.48714
8.38	2.76293	2.26746	8.38	1.79078	2.54343
8.4	2.78649	2.13139	8.4	1.87663	2.74443
8.42	2.98262	2.31017	8.42	1.80611	2.37793
8.44	2.97085	2.25556	8.44	1.92434	2.45171
8.46	2.80026	2.24653	8.46	1.80267	2.49314
8.48	2.78604	2.39331	8.48	1.74417	2.42655
8.5	2.71676	2.22846	8.5	1.76378	2.6958
8.52	2.847	2.50444	8.52	1.7624	2.48749
8.54	2.97378	2.08418	8.54	1.92689	2.56603
8.56	2.90733	2.08585	8.56	1.77699	2.44164
8.58	2.76639	2.36273	8.58	1.88473	2.68432
8.6	2.66833	2.18393	8.6	1.87088	2.37046
8.62	2.57452	2.20902	8.62	1.83553	2.36897
8.64	2.70707	2.11756	8.64	1.8514	2.62532
8.66	2.72043	2.12709	8.66	1.92173	2.68351
8.68	2.74054	2.3593	8.68	1.81034	2.28988
8.7	2.68228	2.08536	8.7	1.74721	2.52285
8.72	2.65984	2.2605	8.72	1.79072	2.29592
8.74	2.57277	2.28376	8.74	1.89161	2.56091
8.76	2.50237	2.13287	8.76	1.84135	2.39431
8.78	2.57811	2.16746	8.78	1.76846	2.30682
8.8	2.50138	2.40021	8.8	1.90309	2.15314
8.82	2.70184	2.22741	8.82	1.76047	2.17218
8.84	2.7512	2.2984	8.84	1.88047	2.22437
8.86	2.55222	2.61557	8.86	1.87979	2.29069
8.88	2.76126	2.54753	8.88	1.82787	2.2714
8.9	2.88739	2.38823	8.9	1.85317	2.13365
8.92	2.83257	2.32174	8.92	1.8489	2.33193
8.94	2.74503	2.17926	8.94	1.84551	2.26193
8.96	2.83408	2.38493	8.96	1.83478	2.35219
8.98	2.60592	2.14627	8.98	1.83557	2.14639
9	2.9009	2.38456	9	1.87139	2.22037
9.02	2.76016	2.50626	9.02	1.82466	2.30238
9.04	2.77002	2.35503	9.04	1.75892	2.18104
9.06	2.87998	2.76354	9.06	1.71901	2.10677
9.08	2.84221	2.40056	9.08	1.76391	1.98662
9.1	2.82366	2.31122	9.1	1.70494	2.15287
9.12	2.73031	2.55348	9.12	1.73894	2.42514
9.14	2.90006	2.44087	9.14	1.74497	2.28902
9.16	2.90759	2.19402	9.16	1.77468	1.84156
9.18	2.89138	2.37632	9.18	1.74511	2.19304
9.2	2.97467	2.43513	9.2	1.73247	2.27193
9.22	2.82996	2.48279	9.22	1.79185	2.33406
9.24	2.76408	2.15177	9.24	1.87615	2.23036
9.26	2.51616	2.18531	9.26	1.83028	2.32552
9.28	2.63786	2.37715	9.28	1.81891	2.27267
9.3	2.51147	2.44006	9.3	1.78578	2.29623
9.32	2.47189	2.36643	9.32	1.83588	2.18446
9.34	2.60083	2.35035	9.34	1.73237	2.46459
9.36	2.56237	2.57062	9.36	1.83554	2.00365
9.38	2.70621	2.21677	9.38	1.93711	2.27625
9.4	2.58797	2.52351	9.4	1.77349	2.33542
9.42	2.56849	2.46702	9.42	1.90463	2.27859
9.44	2.41349	2.29851	9.44	1.86001	2.61486
9.46	2.76818	2.33062	9.46	1.89204	2.53353
9.48	2.72025	2.34722	9.48	1.84992	2.18557
9.5	2.66124	2.14897	9.5	1.81332	2.40457
9.52	2.52649	2.50917	9.52	1.83323	2.55559
9.54	2.50235	2.12744	9.54	1.85367	2.46765
9.56	2.62825	2.38145	9.56	1.89505	2.26354
9.58	2.78648	2.30902	9.58	1.93836	2.66527
9.6	2.63242	2.2858	9.6	1.89879	2.49197
9.62	2.63713	2.36426	9.62	1.87078	2.5758
9.64	2.55422	2.27461	9.64	1.86424	2.53298
9.66	2.62825	2.22395	9.66	1.87446	2.39871
9.68	2.49046	2.3217	9.68	1.8721	2.62193
9.7	2.5698	2.27874	9.7	1.85948	2.60336
9.72	2.6148	2.40042	9.72	1.77902	2.64544
9.74	2.64464	2.10891	9.74	1.81046	2.49264
9.76	2.5893	2.19415	9.76	1.78077	2.57297
9.78	2.64077	2.40966	9.78	1.70987	2.59266
9.8	2.68923	2.30324	9.8	1.83425	2.35612
9.82	2.59657	2.4391	9.82	1.84884	2.50092
9.84	2.58045	2.46292	9.84	1.78238	2.45168
9.86	2.77031	2.3234	9.86	1.70891	2.47175
9.88	2.66329	2.42602	9.88	1.73243	2.49452
9.9	2.67247	2.18494	9.9	1.76618	2.50554
9.92	2.69443	2.43885	9.92	1.7291	2.41459
9.94	2.5499	2.54078	9.94	1.77024	2.45498
9.96	2.69459	2.38149	9.96	1.75816	2.46405
9.98	2.7588	2.4563	9.98	1.64689	2.40858
10	2.7676	2.51805	10	1.71342	2.65451
10.02	2.90195	2.46267	10.02	1.68397	2.73492
10.04	2.65367	2.70757	10.04	1.72308	2.48017
10.06	2.5631	2.53788	10.06	1.67699	2.49624
10.08	2.52622	2.58203	10.08	1.70922	2.65736
10.1	2.53857	2.53646	10.1	1.58924	2.47137
10.12	2.59141	2.4619	10.12	1.61187	2.53858
10.14	2.81663	2.56995	10.14	1.67211	2.46466
10.16	2.89731	2.34961	10.16	1.57936	2.34802
10.18	3.03515	2.65987	10.18	1.65583	2.105
10.2	2.93216	2.49428	10.2	1.65231	2.0803
10.22	3.14738	2.63572	10.22	1.65467	1.97837
10.24	3.1568	2.58507	10.24	1.67637	2.11646
10.26	3.03883	2.48249	10.26	1.60502	2.24125
10.28	3.16933	2.36807	10.28	1.69416	2.35795
10.3	3.31495	2.2197	10.3	1.68557	2.2947
10.32	3.23441	2.50301	10.32	1.76121	2.19909
10.34	3.33227	2.13888	10.34	1.72396	2.25684
10.36	3.22253	2.27971	10.36	1.78259	2.24126
10.38	3.19873	2.41218	10.38	1.82458	2.16403
10.4	3.08128	2.16059	10.4	1.77651	2.30382
10.42	2.89577	2.19413	10.42	1.7544	2.36669
10.44	2.89425	2.30603	10.44	1.74016	2.20131
10.46	3.02319	2.20266	10.46	1.71653	2.11535
10.48	2.90803	2.23796	10.48	1.74915	2.1308
10.5	2.94018	2.45284	10.5	1.67309	2.21
10.52	3.1247	2.08028	10.52	1.67566	2.41345
10.54	3.09344	2.33435	10.54	1.7744	2.19598
10.56	3.04449	2.22173	10.56	1.70159	1.89685
10.58	2.96959	2.53828	10.58	1.8435	2.21446
10.6	2.9364	2.35222	10.6	1.82634	2.24109
10.62	3.02457	2.4033	10.62	1.7887	2.43321
10.64	3.17219	2.56923	10.64	1.86274	2.40002
10.66	3.14195	2.20376	10.66	1.76021	2.57198
10.68	3.20472	2.17661	10.68	1.78616	2.06948
10.7	3.02696	2.37477	10.7	1.7583	2.43715
10.72	3.22039	2.04811	10.72	1.8097	2.54937
10.74	3.09066	2.1639	10.74	1.8112	2.36785
10.76	3.17303	2.29151	10.76	1.87962	2.09651
10.78	3.15617	2.29663	10.78	1.82729	2.27582
10.8	3.04373	2.18386	10.8	1.77635	2.31461
10.82	2.97065	2.59111	10.82	1.88689	2.20821
10.84	2.90016	2.27137	10.84	1.83988	2.34686
10.86	2.9431	2.15266	10.86	1.86609	2.45463
10.88	2.81679	2.37455	10.88	1.87055	2.35787
10.9	2.74192	2.374	10.9	1.83126	2.32083
10.92	2.70648	2.34307	10.92	1.73085	2.32708
10.94	2.68342	2.33376	10.94	1.73891	2.20832
10.96	2.57334	2.40719	10.96	1.71659	2.14443
10.98	2.61016	2.20065	10.98	1.74398	2.3638
11	2.7093	2.57026	11	1.76624	2.14838
11.02	2.68156	2.31079	11.02	1.80854	2.2418
11.04	2.77502	2.2945	11.04	1.82994	2.40424
11.06	2.81049	2.3439	11.06	1.89492	2.13155
11.08	2.73436	2.28256	11.08	1.78811	2.21893
11.1	2.65614	2.22181	11.1	1.76915	2.17394
11.12	2.7201	2.30335	11.12	1.85489	2.21295
11.14	2.67516	2.27771	11.14	1.79123	1.99118
11.16	2.69331	2.12668	11.16	1.79106	2.12503
11.18	2.75422	2.21569	11.18	1.75946	2.27358
11.2	2.66964	2.39222	11.2	1.8222	2.25643
11.22	2.62953	2.34169	11.22	1.75045	2.27904
11.24	2.65528	2.15998	11.24	1.78849	2.19107
11.26	2.49541	2.322	11.26	1.70008	2.33373
11.28	2.46007	2.27475	11.28	1.71949	2.47502
11.3	2.5016	2.17609	11.3	1.7098	2.33229
11.32	2.52059	2.25652	11.32	1.70092	2.2813
11.34	2.51805	2.1608	11.34	1.75093	2.45004
11.36	2.50618	2.21816	11.36	1.65398	2.56103
11.38	2.53754	2.01649	11.38	1.86572	2.20985
11.4	2.69121	2.19594	11.4	1.83953	2.66009
11.42	2.73137	2.23822	11.42	1.87604	2.41459
11.44	2.60408	2.16942	11.44	1.84752	2.4715
11.46	2.8036	2.39995	11.46	1.84044	2.25189
11.48	2.94358	2.12795	11.48	1.83941	2.16941
11.5	2.79163	2.27587	11.5	1.87246	2.38358
11.52	2.69279	2.5306	11.52	1.84603	2.34293
11.54	2.70159	2.23565	11.54	1.81242	2.22133
11.56	2.6647	2.30298	11.56	1.72538	2.4006
11.58	2.92158	2.35026	11.58	1.81513	2.36042
11.6	2.98002	2.39445	11.6	1.76185	2.48033
11.62	2.99658	2.64254	11.62	1.78189	2.74484
11.64	2.99228	2.45719	11.64	1.88582	2.5917
11.66	3.02657	2.43944	11.66	1.86697	2.46578
11.68	3.01244	2.5118	11.68	1.65171	2.42012
11.7	3.03441	2.41027	11.7	1.6928	2.23841
11.72	3.16238	2.38461	11.72	1.78865	2.33005
11.74	3.08934	2.56147	11.74	1.75458	2.25656
11.76	3.12861	2.56767	11.76	1.76861	2.44256
11.78	3.16489	2.52378	11.78	1.74774	2.4109
11.8	3.03181	2.23465	11.8	1.69562	2.31066
11.82	3.14924	2.1286	11.82	1.77934	2.59443
11.84	2.96047	2.40482	11.84	1.83475	2.56674
11.86	2.8609	2.17973	11.86	1.66641	2.48572
11.88	2.94197	2.21201	11.88	1.70765	2.49339
11.9	2.87999	2.35682	11.9	1.77838	2.42894
11.92	2.78001	2.33598	11.92	1.78725	2.61551
11.94	2.98862	2.38571	11.94	1.77659	2.39131
11.96	3.09211	2.423	11.96	1.85899	2.64796
11.98	3.06795	2.41356	11.98	1.90937	2.68308
12	2.98007	2.07724	12	1.81009	2.54421
12.02	3.21097	2.2755	12.02	1.78913	2.58916
12.04	3.1522	2.44956	12.04	1.94685	2.64484
12.06	3.18475	2.29107	12.06	1.87564	2.48812
12.08	3.22056	2.11575	12.08	1.89361	2.42927
12.1	3.13035	2.24245	12.1	1.92727	2.57704
12.12	3.2091	2.27521	12.12	1.82964	2.47519
12.14	3.15116	2.19409	12.14	1.72463	2.22959
12.16	3.32899	2.22443	12.16	1.70899	2.29664
12.18	3.28567	2.3322	12.18	1.68769	2.27159
12.2	3.51207	2.27365	12.2	1.64804	2.50234
12.22	3.32466	2.38367	12.22	1.72105	2.63015
12.24	3.17428	2.24331	12.24	1.67143	2.63224
12.26	3.13451	2.36439	12.26	1.72684	2.59502
12.28	3.12908	2.37905	12.28	1.69751	2.55888
12.3	3.33778	2.30208	12.3	1.60929	2.47511
12.32	3.2489	2.1768	12.32	1.68886	2.63542
12.34	3.22208	2.44399	12.34	1.74169	2.45327
12.36	3.36441	2.48793	12.36	1.62987	2.59356
12.38	3.43128	2.50519	12.38	1.69945	2.44072
12.4	3.52984	2.33681	12.4	1.71734	2.42749
12.42	3.45076	2.4522	12.42	1.67823	2.57153
12.44	3.31219	2.54898	12.44	1.69687	2.32734
12.46	3.31134	2.37908	12.46	1.68668	2.71342
12.48	3.36597	2.63827	12.48	1.70847	2.58133
12.5	3.31488	2.4544	12.5	1.58503	2.57606
12.52	3.35679	2.11115	12.52	1.7241	2.47019
12.54	3.35323	2.33937	12.54	1.74148	2.67349
12.56	3.4722	2.37988	12.56	1.64762	2.43328
12.58	3.34838	2.42483	12.58	1.7587	2.53547
12.6	3.4037	2.46919	12.6	1.6918	2.58673
12.62	3.38443	2.38953	12.62	1.66068	2.34009
12.64	3.45046	2.43862	12.64	1.70298	2.62113
12.66	3.46316	2.42213	12.66	1.79961	2.61697
12.68	3.42504	2.55282	12.68	1.71041	2.48734
12.7	3.31586	2.54904	12.7	1.77114	2.41932
12.72	3.37529	2.48291	12.72	1.88856	2.76682
12.74	3.45964	2.60973	12.74	1.83419	2.53376
12.76	3.55339	2.39014	12.76	1.79277	2.66132
12.78	3.31565	2.56644	12.78	1.7905	2.66403
12.8	3.41023	2.33012	12.8	1.86604	2.59652
12.82	3.51742	2.13149	12.82	1.93287	2.25342
12.84	3.56999	2.23034	12.84	1.81389	2.6362
12.86	3.52208	2.4736	12.86	1.77757	2.43953
12.88	3.6599	2.6022	12.88	1.77618	2.69779
12.9	3.69633	2.53043	12.9	1.87196	2.5174
12.92	3.6824	2.13509	12.92	1.91347	2.45541
12.94	3.73453	2.34921	12.94	1.77198	2.30173
12.96	3.82829	2.25194	12.96	1.81935	2.31362
12.98	3.80686	2.52795	12.98	1.69328	2.54124
13	3.73876	2.52611	13	1.69738	2.44545
13.02	3.53271	2.53309	13.02	1.82683	2.50357
13.04	3.60647	2.46463	13.04	1.82504	2.49599
13.06	3.47323	2.4594	13.06	1.75918	2.46404
13.08	3.66756	2.52448	13.08	1.79468	2.49332
13.1	3.61266	2.26204	13.1	1.76921	2.50909
13.12	3.5105	2.2411	13.12	1.7464	2.31995
13.14	3.21399	2.39076	13.14	1.64986	2.41384
13.16	3.09892	2.16052	13.16	1.69125	2.5904
13.18	3.20644	2.28344	13.18	1.73228	2.48267
13.2	3.07981	2.12784	13.2	1.61215	2.34897
13.22	2.97599	2.37522	13.22	1.75453	2.44997
13.24	2.95723	2.3542	13.24	1.72422	2.41873
13.26	3.00559	2.46645	13.26	1.63986	2.38291
13.28	3.03777	2.35241	13.28	1.70019	2.66619
13.3	2.91513	2.5746	13.3	1.79637	2.53747
13.32	3.0322	2.64371	13.32	1.702	2.50071
13.34	3.06837	2.4669	13.34	1.69044	2.5776
13.36	3.00548	2.39601	13.36	1.81312	2.57113
13.38	3.15509	2.37917	13.38	1.8191	2.44444
13.4	3.20488	2.60471	13.4	1.77222	2.62467
13.42	3.20357	2.45902	13.42	1.77709	2.58341
13.44	3.24524	2.73189	13.44	1.68742	2.34158
13.46	3.21467	2.549	13.46	1.70439	2.50749
13.48	3.29868	2.61362	13.48	1.82134	2.51295
13.5	3.36627	2.52393	13.5	1.76746	2.67238
13.52	3.71118	2.52087	13.52	1.81017	2.53251
13.54	3.4416	2.47231	13.54	1.73059	2.5033
13.56	3.56391	2.09531	13.56	1.69086	2.54002
13.58	3.22874	2.03995	13.58	1.72423	2.63867
13.6	3.40525	2.36017	13.6	1.76068	2.71017
13.62	3.47532	2.10857	13.62	1.63014	2.64752
13.64	3.46458	2.4218	13.64	1.66582	2.67579
13.66	3.35677	2.18033	13.66	1.71924	2.14611
13.68	3.36581	2.08284	13.68	1.69463	2.30776
13.7	3.40099	2.16175	13.7	1.66381	2.50771
13.72	3.56823	2.12648	13.72	1.61265	2.49212
13.74	3.54563	2.21371	13.74	1.70031	2.50653
13.76	3.61641	2.24612	13.76	1.73345	2.47556
13.78	3.68976	2.58244	13.78	1.69176	2.51837
13.8	3.59387	2.20463	13.8	1.63259	2.38484
13.82	3.67986	2.14534	13.82	1.63244	2.60098
13.84	3.56568	2.28973	13.84	1.61629	2.24175
13.86	3.38102	2.32609	13.86	1.64015	2.44559
13.88	3.38017	2.07998	13.88	1.61239	2.3502
13.9	3.20444	2.2593	13.9	1.60043	2.34929
13.92	3.02738	2.37246	13.92	1.63039	2.6558
13.94	2.9775	2.30431	13.94	1.62858	2.39761
13.96	2.93102	2.23784	13.96	1.67447	2.2658
13.98	3.15793	2.16659	13.98	1.70004	2.35447
14	3.29753	2.18248	14	1.66244	2.31386
14.02	3.43293	2.43577	14.02	1.61393	2.30734
14.04	3.54544	2.40817	14.04	1.64446	2.19322
14.06	3.39068	2.34768	14.06	1.7039	2.20605
14.08	3.55634	2.36412	14.08	1.68236	2.32517
14.1	3.4364	2.44387	14.1	1.65845	2.20134
14.12	3.33667	2.27676	14.12	1.74882	2.05941
14.14	3.40546	2.59578	14.14	1.68213	2.38755
14.16	3.40955	2.49435	14.16	1.68254	2.29021
14.18	3.38086	2.40623	14.18	1.66828	2.44066
14.2	3.68028	2.54982	14.2	1.75	2.49108
14.22	3.60945	2.31099	14.22	1.78557	2.36881
14.24	3.51959	2.59765	14.24	1.78225	2.29695
14.26	3.39328	2.48772	14.26	1.71034	2.40913
14.28	3.53447	2.54411	14.28	1.81863	2.49801
14.3	3.67062	2.58245	14.3	1.75578	2.44978
14.32	3.45982	2.3417	14.32	1.73683	2.30303
14.34	3.32589	2.31493	14.34	1.73769	2.47283
14.36	3.35725	2.45274	14.36	1.7521	2.3406
14.38	3.3447	2.49574	14.38	1.80437	2.26211
14.4	3.3776	2.36233	14.4	1.74262	2.3881
14.42	3.27101	2.60169	14.42	1.83667	2.37286
14.44	3.40192	2.39517	14.44	1.71887	2.29993
14.46	3.21407	2.48939	14.46	1.78984	2.24857
14.48	3.11669	2.70799	14.48	1.74976	2.4903
14.5	3.27388	2.35053	14.5	1.78436	2.3953
14.52	3.26114	2.4759	14.52	1.75115	2.20119
14.54	3.14287	2.63711	14.54	1.69163	2.32105
14.56	3.29762	2.57519	14.56	1.6144	2.37261
14.58	3.48317	2.53529	14.58	1.66604	2.44937
14.6	3.41997	2.39291	14.6	1.61188	2.3242
14.62	3.37562	2.46121	14.62	1.68123	2.28171
14.64	3.37355	2.43411	14.64	1.61604	2.38164
14.66	3.47571	2.43694	14.66	1.62577	2.31973
14.68	3.2717	2.51006	14.68	1.69278	2.47985
14.7	3.38803	2.07299	14.7	1.63041	2.39958
14.72	3.21491	2.14056	14.72	1.60406	2.35476
14.74	3.39886	2.22149	14.74	1.67331	2.35331
14.76	3.34929	2.28162	14.76	1.6876	2.43219
14.78	3.25868	2.3602	14.78	1.83307	2.58377
14.8	3.29079	2.09571	14.8	1.77317	2.2539
14.82	3.12239	2.30412	14.82	1.67149	2.4199
14.84	3.30978	2.00798	14.84	1.72578	2.34959
14.86	3.35739	2.53623	14.86	1.70414	2.53152
14.88	3.1316	2.45955	14.88	1.71401	2.44717
14.9	3.33985	2.15607	14.9	1.75603	2.25755
14.92	3.4481	2.44927	14.92	1.74038	2.47421
14.94	3.36034	2.41003	14.94	1.72015	2.28377
14.96	3.31004	2.54687	14.96	1.60723	2.52219
14.98	3.40612	2.41988	14.98	1.72139	2.43655
15	3.40211	2.52986	15	1.71028	2.47187
15.02	3.38787	2.47385	15.02	1.82025	2.2094
15.04	3.35847	2.42296	15.04	1.73533	2.30763
15.06	3.11759	2.38179	15.06	1.73122	2.33425
15.08	3.0414	2.38388	15.08	1.65044	2.23767
15.1	3.23392	2.49199	15.1	1.71426	2.22944
15.12	3.14418	2.49286	15.12	1.75029	2.34643
15.14	3.16864	2.35714	15.14	1.7096	2.25944
15.16	2.93643	2.57475	15.16	1.71735	2.46255
15.18	2.85793	2.39225	15.18	1.85867	2.52546
15.2	2.95873	2.46818	15.2	1.86764	2.29201
15.22	2.96638	2.54975	15.22	1.82769	2.26459
15.24	2.99149	2.39726	15.24	1.71518	2.41055
15.26	2.86927	2.45114	15.26	1.66794	2.44713
15.28	2.86669	2.38867	15.28	1.63621	2.45371
15.3	2.81836	2.38134	15.3	1.71314	2.24384
15.32	2.84303	2.20901	15.32	1.70357	2.28475
15.34	2.91615	2.14585	15.34	1.80433	2.38866
15.36	2.95019	2.45318	15.36	1.73702	2.53865
15.38	2.92742	2.59817	15.38	1.7133	2.5791
15.4	2.81068	2.53168	15.4	1.79156	2.29763
15.42	2.57041	2.42739	15.42	1.71165	2.39139
15.44	2.45082	2.56359	15.44	1.75404	2.44629
15.46	2.40003	2.58907	15.46	1.86731	2.52052
15.48	2.43885	2.28155	15.48	1.88393	2.36371
15.5	2.40855	2.47754	15.5	1.80254	2.2936
15.52	2.52776	2.46279	15.52	1.83843	2.46033
15.54	2.58978	2.46432	15.54	1.87823	2.38185
15.56	2.43778	2.60532	15.56	1.95236	2.64737
15.58	2.56514	2.54198	15.58	1.87275	2.50955
15.6	2.76325	2.48606	15.6	1.95928	2.54922
15.62	2.65416	2.48974	15.62	1.98091	2.44396
15.64	2.63083	2.44472	15.64	1.87133	2.56186
15.66	2.76043	2.39323	15.66	1.95726	2.47683
15.68	2.86093	2.31668	15.68	1.92631	2.5667
15.7	2.81816	2.64037	15.7	1.9713	2.67785
15.72	2.93978	2.31101	15.72	1.97875	2.47177
15.74	2.86445	2.32147	15.74	1.97974	2.45081
15.76	3.12235	2.14655	15.76	1.94725	2.16456
15.78	3.18769	2.22089	15.78	1.9153	2.40721
15.8	3.07073	2.47112	15.8	1.94953	2.7597
15.82	3.02366	2.35768	15.82	1.99266	2.59231
15.84	3.2403	2.49949	15.84	1.96053	2.48418
15.86	3.26355	2.55747	15.86	1.90482	2.61951
15.88	3.32812	2.54255	15.88	1.8476	2.42047
15.9	3.40648	2.37191	15.9	1.84135	2.44076
15.92	3.40015	2.30587	15.92	1.94465	2.43836
15.94	3.34384	2.34121	15.94	1.86851	2.65745
15.96	3.50172	2.42963	15.96	1.89202	2.46135
15.98	3.56754	2.17134	15.98	1.796	2.22911
16	3.47044	2.14604	16	1.78628	2.31756
16.02	3.46	2.08651	16.02	1.83395	2.21339
16.04	3.4003	2.26255	16.04	1.78996	2.16996
16.06	3.49861	2.1614	16.06	1.81419	2.3696
16.08	3.40548	2.39218	16.08	1.88301	2.30383
16.1	3.43969	2.32613	16.1	1.91087	2.10035
16.12	3.52671	2.17939	16.12	1.84808	2.18987
16.14	3.34161	2.23048	16.14	1.92892	2.12272
16.16	3.11065	2.35348	16.16	1.84039	2.06074
16.18	3.26914	2.17565	16.18	1.81843	2.10315
16.2	3.2921	2.1614	16.2	1.77482	2.16139
16.22	3.21263	2.43468	16.22	1.83874	2.15891
16.24	3.16111	2.52812	16.24	1.78473	2.19588
16.26	3.05983	2.48491	16.26	1.88214	2.32659
16.28	3.09647	2.41333	16.28	1.79463	2.40776
16.3	3.07194	2.32164	16.3	1.82197	2.52492
16.32	2.94821	2.20811	16.32	1.8649	2.50377
16.34	2.82353	2.32446	16.34	1.71372	2.46454
16.36	2.91882	2.12517	16.36	1.71351	2.37356
16.38	3.0939	2.52624	16.38	1.76649	2.32703
16.4	3.03277	2.51687	16.4	1.80963	2.70033
16.42	2.96545	2.63409	16.42	1.84711	2.56894
16.44	2.77209	2.46872	16.44	1.85418	2.71313
16.46	2.87654	2.36954	16.46	1.89371	2.5082
16.48	2.90034	2.57298	16.48	1.85075	2.69618
16.5	2.99946	2.38989	16.5	1.79547	2.50725
16.52	3.16136	2.40263	16.52	1.78042	2.50516
16.54	3.29991	2.64492	16.54	1.7604	2.6841
16.56	3.27359	2.44892	16.56	1.77121	2.52907
16.58	3.21861	2.40524	16.58	1.73118	2.51351
16.6	3.22734	2.43472	16.6	1.79098	2.58228
16.62	3.30396	2.3955	16.62	1.7422	2.54283
16.64	3.27539	2.51467	16.64	1.72508	2.47964
16.66	3.34179	2.49908	16.66	1.78991	2.49023
16.68	3.49271	2.36877	16.68	1.63938	2.52342
16.7	3.38829	2.33048	16.7	1.78932	2.32351
16.72	3.43167	2.27436	16.72	1.74182	2.56663
16.74	3.46314	2.28128	16.74	1.77452	2.52283
16.76	3.34666	2.40543	16.76	1.83139	2.3068
16.78	3.60272	2.26374	16.78	1.7686	2.34899
16.8	3.5464	2.44893	16.8	1.77373	2.36319
16.82	3.54167	2.38031	16.82	1.82845	2.11649
16.84	3.38882	2.42444	16.84	1.90088	2.05789
16.86	3.18992	2.31844	16.86	1.77791	2.41368
16.88	3.09543	2.76475	16.88	1.87771	2.4238
16.9	2.98471	2.45815	16.9	1.90437	2.32648
16.92	2.99582	2.46947	16.92	1.80945	2.33753
16.94	3.22218	2.47809	16.94	1.7661	2.24728
16.96	3.17561	2.55591	16.96	1.73551	2.05309
16.98	3.3651	2.47757	16.98	1.71354	2.21877
17	3.51169	2.55922	17	1.73091	2.45849
17.02	3.42809	2.57995	17.02	1.75139	2.24461
17.04	3.32093	2.45931	17.04	1.73736	2.22212
17.06	3.60269	2.62614	17.06	1.75958	2.27558
17.08	3.63512	2.53857	17.08	1.71189	2.25164
17.1	3.66052	2.42649	17.1	1.70377	2.75235
17.12	3.67637	2.22826	17.12	1.78014	2.84376
17.14	3.70639	2.39983	17.14	1.74456	2.58241
17.16	3.6981	2.59688	17.16	1.81919	2.42937
17.18	3.66485	2.44228	17.18	1.76072	2.47956
17.2	3.75597	2.3789	17.2	1.82729	2.46669
17.22	3.68247	2.23101	17.22	1.8004	2.46592
17.24	3.75059	2.4743	17.24	1.78147	2.2848
17.26	3.82578	2.53969	17.26	1.77849	2.16948
17.28	3.75482	2.26703	17.28	1.66553	2.41612
17.3	3.82841	2.16584	17.3	1.70778	2.32405
17.32	3.93829	2.20655	17.32	1.79045	2.11898
17.34	3.97731	2.20855	17.34	1.72886	2.42007
17.36	3.66879	2.07349	17.36	1.82219	2.49814
17.38	3.6564	1.97273	17.38	1.71739	2.32605
17.4	3.88305	2.3112	17.4	1.78255	2.49124
17.42	3.90132	2.10418	17.42	1.78549	2.46026
17.44	3.81665	2.17312	17.44	1.84573	2.57595
17.46	3.84835	2.17405	17.46	1.85895	2.56925
17.48	3.55317	2.12738	17.48	1.88391	2.11615
17.5	3.56836	2.19943	17.5	1.91405	2.13992
17.52	3.70531	2.13509	17.52	1.73941	2.15633
17.54	3.64863	2.33219	17.54	1.80177	2.39159
17.56	3.54703	2.3035	17.56	1.79308	2.2426
17.58	3.57758	2.28605	17.58	1.83179	2.38869
17.6	3.54564	2.34398	17.6	1.89491	2.22615
17.62	3.6704	2.12058	17.62	1.9761	2.22469
17.64	3.81892	2.12189	17.64	1.92036	2.13076
17.66	3.64491	2.30675	17.66	1.8249	2.0893
17.68	3.77797	2.2601	17.68	1.82078	2.27598
17.7	3.9049	2.16292	17.7	1.85662	2.15591
17.72	3.66641	2.32652	17.72	1.88994	2.32417
17.74	3.77007	2.56132	17.74	1.95569	2.41822
17.76	3.87691	2.4419	17.76	1.86984	2.20647
17.78	3.73158	2.41021	17.78	1.90002	2.1481
17.8	3.68067	2.43676	17.8	1.81177	2.51258
17.82	3.54613	2.2158	17.82	1.89409	2.2351
17.84	3.69075	2.33203	17.84	1.8941	2.50769
17.86	3.81028	2.38931	17.86	1.90854	2.25983
17.88	3.80965	2.42887	17.88	1.93806	2.40457
17.9	3.70513	2.58134	17.9	1.85771	2.31242
17.92	3.7881	2.36739	17.92	1.87844	2.2549
17.94	3.67826	2.52806	17.94	1.84129	2.33535
17.96	3.62762	2.43597	17.96	1.88709	2.45703
17.98	3.66094	2.43826	17.98	1.98358	2.12141
18	3.79419	2.37528	18	1.94088	2.0748
18.02	3.57017	2.5269	18.02	1.95937	2.26475
18.04	3.33271	2.27975	18.04	1.89383	2.0749
18.06	3.25616	2.41726	18.06	1.94807	2.08551
18.08	3.31529	2.51193	18.08	1.94878	2.04352
18.1	3.37187	2.53251	18.1	1.93365	2.03523
18.12	3.40673	2.61431	18.12	1.91972	2.13923
18.14	3.52938	2.48582	18.14	2.02656	2.3964
18.16	3.61572	2.82221	18.16	2.04387	1.99485
18.18	3.61643	2.40887	18.18	1.97496	2.04105
18.2	3.59422	2.50512	18.2	2.00497	2.06192
18.22	3.46202	2.49796	18.22	1.90789	2.28553
18.24	3.45087	2.49752	18.24	1.87528	2.13996
18.26	3.4608	2.3725	18.26	1.82647	2.13525
18.28	3.66389	2.72594	18.28	1.79324	2.19204
18.3	3.74926	2.19422	18.3	1.83109	2.14396
18.32	4.06214	2.21423	18.32	1.79258	2.14027
18.34	3.97888	2.58391	18.34	1.76554	2.04661
18.36	3.84163	2.41136	18.36	1.86252	2.42371
18.38	3.73936	2.25057	18.38	1.84165	2.25523
18.4	3.6739	2.22925	18.4	1.84581	2.25651
18.42	3.60484	2.42315	18.42	1.95423	2.10493
18.44	3.74902	2.50497	18.44	1.97183	2.16273
18.46	3.73303	2.61397	18.46	2.0084	2.20433
18.48	3.84955	2.7167	18.48	1.96879	2.27557
18.5	3.66028	2.42175	18.5	1.90379	2.28195
18.52	3.6244	2.12093	18.52	1.91445	2.46019
18.54	3.84281	2.21364	18.54	1.8239	2.32961
18.56	3.68155	2.4848	18.56	1.83071	2.12269
18.58	3.79724	2.29552	18.58	1.94798	2.25974
18.6	3.79319	2.19982	18.6	1.88131	2.14225
18.62	3.81439	2.15346	18.62	1.82815	2.087
18.64	3.84225	2.18471	18.64	1.77137	2.29812
18.66	3.85585	2.24991	18.66	1.76603	2.05699
18.68	3.80773	2.0966	18.68	1.78894	1.98789
18.7	3.69575	2.41397	18.7	1.82728	2.22088
18.72	3.72442	2.03614	18.72	1.781	2.30848
18.74	3.69046	2.23428	18.74	1.67633	2.28749
18.76	3.6732	2.23406	18.76	1.80535	2.34238
18.78	3.81364	2.36912	18.78	1.71699	2.24614
18.8	3.75348	2.48225	18.8	1.76918	2.29181
18.82	3.65986	2.23568	18.82	1.72853	2.26023
18.84	3.65179	2.26388	18.84	1.77604	2.43689
18.86	3.7791	2.16912	18.86	1.77939	2.62898
18.88	3.69789	2.22839	18.88	1.77593	2.35634
18.9	3.49516	2.11855	18.9	1.72587	2.57975
18.92	3.68919	2.07066	18.92	1.74727	2.38654
18.94	3.57542	2.35872	18.94	1.82291	2.40521
18.96	3.5154	2.31287	18.96	1.78948	2.58357
18.98	3.51181	2.28147	18.98	1.82176	2.3681
19	3.47342	2.32486	19	1.79235	2.16821
19.02	3.3863	2.5159	19.02	1.78708	2.20493
19.04	3.2656	2.39179	19.04	1.72637	2.21567
19.06	3.381	2.29665	19.06	1.69707	2.46875
19.08	3.47879	2.44039	19.08	1.61281	2.32849
19.1	3.36495	2.2966	19.1	1.73041	2.55701
19.12	3.48003	2.3762	19.12	1.79965	2.58955
19.14	3.3229	2.52331	19.14	1.7112	2.40225
19.16	3.59394	2.34406	19.16	1.5842	2.39254
19.18	3.71045	2.03719	19.18	1.67204	2.47296
19.2	3.80152	1.99144	19.2	1.69971	2.0409
19.22	4.01247	2.26616	19.22	1.87232	2.20711
19.24	4.00432	2.34196	19.24	1.72385	2.25041
19.26	4.00203	2.29777	19.26	1.65124	2.09928
19.28	3.97819	2.40675	19.28	1.70237	2.41267
19.3	3.91903	2.28985	19.3	1.7086	2.30905
19.32	3.85805	2.34877	19.32	1.6707	2.39392
19.34	3.9126	2.26123	19.34	1.68433	2.41475
19.36	4.01594	2.19445	19.36	1.72017	2.34224
19.38	3.862	2.41294	19.38	1.74387	2.47246
19.4	3.89114	2.29768	19.4	1.75069	2.34006
19.42	3.93206	2.41615	19.42	1.8671	2.58281
19.44	3.82243	2.11859	19.44	1.7898	2.55841
19.46	3.65007	2.15336	19.46	1.77489	2.55347
19.48	3.76044	2.15902	19.48	1.79068	2.53517
19.5	3.6809	2.27246	19.5	1.69396	2.48763
19.52	3.4514	2.29478	19.52	1.62177	2.36431
19.54	3.21246	2.21486	19.54	1.64373	2.5233
19.56	3.28377	2.36186	19.56	1.78446	2.55332
19.58	3.24254	2.29348	19.58	1.86287	2.60534
19.6	3.39216	2.29129	19.6	1.79468	2.55892
19.62	3.39129	2.40093	19.62	1.76536	2.43968
19.64	3.23137	2.24326	19.64	1.76723	2.5804
19.66	3.15506	2.32424	19.66	1.7969	2.57801
19.68	3.13218	2.21518	19.68	1.7975	2.58359
19.7	3.05269	2.29017	19.7	1.74935	2.42284
19.72	3.06172	2.26495	19.72	1.8436	2.36627
19.74	3.01348	2.14364	19.74	1.77956	2.32719
19.76	3.17616	2.2242	19.76	1.8487	2.18721
19.78	3.18844	2.13825	19.78	1.75825	1.90874
19.8	3.15354	2.36914	19.8	1.77998	2.14162
19.82	3.3213	2.4241	19.82	1.76674	2.59008
19.84	3.2195	1.99587	19.84	1.88334	2.49426
19.86	3.12027	2.3587	19.86	1.72953	2.2336
19.88	3.21948	2.26693	19.88	1.81601	2.26451
19.9	2.98989	2.22864	19.9	1.70961	2.1391
19.92	2.89233	2.20971	19.92	1.69297	2.20019
19.94	2.97254	2.12515	19.94	1.8088	2.08584
19.96	3.03532	2.40637	19.96	1.68998	2.16054
19.98	2.99226	1.9616	19.98	1.71576	2.2408
20	2.99673	2.15502	20	1.74076	2.19435
20.02	2.80212	1.97462	20.02	1.74254	2.31551
20.04	2.9253	2.03329	20.04	1.76023	2.41845
20.06	3.1523	2.04296	20.06	1.79137	2.57707
20.08	3.0638	1.89451	20.08	1.7505	2.61446
20.1	2.93555	1.86697	20.1	1.76568	2.44683
20.12	2.89279	1.7611	20.12	1.68462	2.43171
20.14	2.77237	2.46926	20.14	1.67919	2.5445
20.16	2.62604	2.26007	20.16	1.64612	2.31967
20.18	2.77775	2.55877	20.18	1.62547	2.31872
20.2	2.80326	2.50226	20.2	1.61997	2.57471
20.22	2.90189	2.28995	20.22	1.67215	2.38408
20.24	2.94923	2.44972	20.24	1.78657	2.5747
20.26	2.99934	2.45278	20.26	1.76681	2.60163
20.28	2.77739	2.25633	20.28	1.86709	2.56622
20.3	2.88139	2.09014	20.3	1.75277	2.47846
20.32	3.06363	2.0403	20.32	1.67663	2.49634
20.34	3.08048	2.30456	20.34	1.63462	2.51957
20.36	3.07726	2.15089	20.36	1.67265	2.41856
20.38	3.00955	2.22655	20.38	1.79313	2.70356
20.4	3.16876	2.20803	20.4	1.76592	2.49821
20.42	3.06345	2.2574	20.42	1.74386	2.71992
20.44	3.15644	2.27525	20.44	1.64912	2.79631
20.46	3.17296	2.47135	20.46	1.63557	2.5485
20.48	3.31387	2.43876	20.48	1.64056	2.53134
20.5	3.30424	2.70312	20.5	1.77485	2.69488
20.52	3.19067	2.42692	20.52	1.79376	2.44333
20.54	3.30232	2.36703	20.54	1.69709	2.30094
20.56	3.30566	2.36602	20.56	1.69589	2.44588
20.58	3.45959	2.44275	20.58	1.7925	2.61469
20.6	3.53011	2.11162	20.6	1.7438	2.5837
20.62	3.60855	2.11138	20.62	1.75287	2.66052
20.64	3.44669	2.02404	20.64	1.77317	2.63506
20.66	3.40508	2.10356	20.66	1.78904	2.45629
20.68	3.51232	2.30553	20.68	1.82265	2.58333
20.7	3.42825	2.25381	20.7	1.76531	2.50291
20.72	3.56625	2.43558	20.72	1.70815	2.50274
20.74	3.76198	2.21874	20.74	1.72837	2.33108
20.76	3.65837	2.36109	20.76	1.67238	2.45265
20.78	3.7172	2.6635	20.78	1.69543	2.42214
20.8	3.53195	2.30634	20.8	1.73317	2.69469
20.82	3.6441	2.27842	20.82	1.798	2.10392
20.84	3.62926	2.42642	20.84	1.78911	2.25148
20.86	3.67175	2.45117	20.86	1.9433	2.33862
20.88	3.87069	2.32874	20.88	1.89514	2.5186
20.9	3.91675	2.36066	20.9	1.69497	2.47845
20.92	3.7208	2.51315	20.92	1.7469	2.35296
20.94	3.87665	2.40423	20.94	1.69846	2.50814
20.96	3.73563	2.51173	20.96	1.70125	2.3811
20.98	3.74284	2.54773	20.98	1.7882	2.54776
21	3.77613	2.50193	21	1.87401	2.2151
21.02	3.98191	2.30097	21.02	1.85574	2.46068
21.04	3.9251	2.42018	21.04	1.75244	2.45795
21.06	3.63094	2.65391	21.06	1.7419	2.37653
21.08	3.6659	2.5677	21.08	1.68558	2.34578
21.1	3.80637	2.3409	21.1	1.65966	2.28844
21.12	3.66002	2.37343	21.12	1.72758	2.17272
21.14	3.70387	2.01731	21.14	1.69367	2.29016
21.16	3.72811	2.03953	21.16	1.70058	2.23437
21.18	3.88719	2.17579	21.18	1.81164	2.53404
21.2	3.94096	2.29766	21.2	1.67121	2.46208
21.22	4.02102	2.11311	21.22	1.75853	2.29033
21.24	3.81716	2.2901	21.24	1.64907	2.33824
21.26	3.75457	2.60803	21.26	1.71579	2.35079
21.28	3.5785	2.21112	21.28	1.74052	2.38058
21.3	3.4979	2.24733	21.3	1.79516	2.30465
21.32	3.48511	2.09121	21.32	1.77324	2.1979
21.34	3.56222	2.36008	21.34	1.61496	2.52023
21.36	3.51183	2.16716	21.36	1.71611	1.95915
21.38	3.44922	2.36415	21.38	1.72221	2.31332
21.4	3.47599	2.44298	21.4	1.72794	2.14247
21.42	3.32681	2.31976	21.42	1.71337	2.12677
21.44	3.23609	2.13079	21.44	1.6797	2.43692
21.46	3.22548	2.23428	21.46	1.76717	2.28232
21.48	3.1719	2.32102	21.48	1.79104	2.15837
21.5	3.01416	2.50045	21.5	1.69248	2.35416
21.52	2.98771	2.28938	21.52	1.725	2.22454
21.54	2.948	2.40233	21.54	1.81982	2.13573
21.56	2.86692	2.2929	21.56	1.8533	2.09414
21.58	2.81497	2.24646	21.58	1.79036	2.28279
21.6	3.06599	2.23589	21.6	1.79225	2.13492
21.62	3.03308	2.39986	21.62	1.71317	2.05835
21.64	3.11451	2.29031	21.64	1.78125	2.4963
21.66	3.08064	2.17903	21.66	1.68326	2.27394
21.68	2.99418	2.26531	21.68	1.74607	2.45911
21.7	2.88698	2.04531	21.7	1.85716	2.28638
21.72	2.83911	2.23888	21.72	1.80356	2.29515
21.74	2.95118	2.23353	21.74	1.78029	2.26955
21.76	2.75396	2.50371	21.76	1.65736	2.36948
21.78	2.83717	2.22831	21.78	1.62658	2.02637
21.8	2.80327	2.30621	21.8	1.79389	2.26043
21.82	2.80869	2.14228	21.82	1.77106	2.24262
21.84	2.68745	2.35171	21.84	1.69345	2.75303
21.86	2.52113	2.63806	21.86	1.7116	2.3622
21.88	2.58819	2.48411	21.88	1.77317	2.3343
21.9	2.49474	2.27909	21.9	1.7491	2.19306
21.92	2.37386	2.32103	21.92	1.7891	2.38107
21.94	2.52149	2.32994	21.94	1.76639	2.28044
21.96	2.48093	2.52283	21.96	1.74426	2.25972
21.98	2.4139	2.29684	21.98	1.67789	2.25284
22	2.57494	2.15811	22	1.93416	2.29863
22.02	2.72439	2.30682	22.02	1.86295	2.51916
22.04	2.61963	2.35302	22.04	1.67079	2.51582
22.06	2.50405	2.68833	22.06	1.68248	2.48496
22.08	2.6101	2.2691	22.08	1.62193	2.26716
22.1	2.69969	2.40032	22.1	1.69282	2.34789
22.12	2.71968	2.41555	22.12	1.70154	2.40384
22.14	2.6631	2.28603	22.14	1.64386	2.50781
22.16	2.68177	2.29071	22.16	1.73713	2.26512
22.18	2.66777	2.54042	22.18	1.73893	2.28152
22.2	2.59033	2.3442	22.2	1.72496	2.30164
22.22	2.52398	2.39193	22.22	1.64194	2.49565
22.24	2.51286	2.5302	22.24	1.63468	2.35445
22.26	2.46386	2.39757	22.26	1.70705	2.34024
22.28	2.38221	2.45609	22.28	1.76549	2.48357
22.3	2.33977	2.33826	22.3	1.74763	2.34198
22.32	2.22054	2.35433	22.32	1.69412	2.34814
22.34	2.17345	2.27445	22.34	1.75802	2.28951
22.36	2.28865	2.39678	22.36	1.78929	2.37941
22.38	2.28558	2.25402	22.38	1.77721	2.30032
22.4	2.23102	2.32404	22.4	1.74908	2.44455
22.42	2.20497	2.36055	22.42	1.7224	2.1893
22.44	2.19326	2.43687	22.44	1.73023	2.35538
22.46	2.15379	2.44635	22.46	1.81133	2.28243
22.48	2.33643	2.4601	22.48	1.84544	2.40163
22.5	2.34427	2.40742	22.5	1.74539	2.36369
22.52	2.34204	2.41009	22.52	1.81113	2.30761
22.54	2.28781	2.42466	22.54	1.77665	2.23052
22.56	2.3645	2.50028	22.56	1.70875	2.43457
22.58	2.39901	2.18842	22.58	1.69513	2.166
22.6	2.37002	2.33491	22.6	1.78408	2.18525
22.62	2.4139	2.13795	22.62	1.76025	2.39913
22.64	2.44092	2.2418	22.64	1.69587	2.39429
22.66	2.39197	2.35833	22.66	1.83892	2.19643
22.68	2.41774	2.36666	22.68	1.7905	2.52197
22.7	2.56316	2.25221	22.7	1.81433	2.46659
22.72	2.44233	2.38338	22.72	1.76098	2.37465
22.74	2.4855	2.34029	22.74	1.68853	2.25551
22.76	2.47038	2.28161	22.76	1.73223	2.19169
22.78	2.42832	2.50812	22.78	1.84393	2.52578
22.8	2.43831	2.65362	22.8	1.76777	2.37079
22.82	2.35971	2.68349	22.82	1.76197	2.45705
22.84	2.39557	2.37676	22.84	1.8684	2.62109
22.86	2.50844	2.33827	22.86	1.73673	2.37152
22.88	2.33504	2.61314	22.88	1.79044	2.47356
22.9	2.45324	2.5511	22.9	1.83252	2.29274
22.92	2.40345	2.40909	22.92	1.66166	2.24583
22.94	2.44328	2.44037	22.94	1.77469	2.36694
22.96	2.38584	2.45674	22.96	1.68404	2.21733
22.98	2.3644	2.31228	22.98	1.70116	2.20483
23	2.37304	2.20659	23	1.7735	2.23638
23.02	2.51265	2.54863	23.02	1.79908	2.27825
23.04	2.48131	2.60598	23.04	1.7818	2.37942
23.06	2.58373	2.38588	23.06	1.64992	2.03202
23.08	2.33602	2.38444	23.08	1.75758	2.17922
23.1	2.33649	2.38076	23.1	1.77434	2.20788
23.12	2.28755	2.36774	23.12	1.76464	2.20861
23.14	2.38187	2.43497	23.14	1.7643	2.48326
23.16	2.43794	2.18701	23.16	1.71522	2.39552
23.18	2.43855	2.61024	23.18	1.69044	2.37953
23.2	2.27683	2.41375	23.2	1.76896	2.3024
23.22	2.35454	2.35996	23.22	1.72724	2.05225
23.24	2.2971	2.43043	23.24	1.84552	2.38493
23.26	2.4192	2.33286	23.26	1.85187	2.00683
23.28	2.44477	2.3304	23.28	1.67479	2.53614
23.3	2.38594	2.28768	23.3	1.7168	2.27733
23.32	2.42863	2.01563	23.32	1.71291	2.35095
23.34	2.48348	2.21933	23.34	1.76111	2.29073
23.36	2.43259	2.31777	23.36	1.74312	2.38872
23.38	2.39831	2.33602	23.38	1.7519	2.39319
23.4	2.37103	2.22546	23.4	1.71163	2.48045
23.42	2.35874	2.3795	23.42	1.77782	2.40901
23.44	2.41667	2.16192	23.44	1.68824	2.22236
23.46	2.60178	2.38321	23.46	1.76342	2.61983
23.48	2.58753	2.36854	23.48	1.74525	2.4617
23.5	2.56944	2.36204	23.5	1.70624	2.51566
23.52	2.57682	2.18532	23.52	1.69357	2.49651
23.54	2.5778	2.2661	23.54	1.69739	2.54227
23.56	2.52452	2.28848	23.56	1.78209	2.47279
23.58	2.63348	2.3087	23.58	1.71379	2.48553
23.6	2.61225	2.28181	23.6	1.76906	2.38953
23.62	2.57901	2.24812	23.62	1.78789	2.33417
23.64	2.67991	2.41703	23.64	1.83278	2.39693
23.66	2.58406	2.16555	23.66	1.84377	2.54034
23.68	2.62338	2.33874	23.68	1.772	2.23233
23.7	2.5078	2.28836	23.7	1.71514	2.44171
23.72	2.50181	2.2988	23.72	1.69673	2.48537
23.74	2.45239	2.4287	23.74	1.74246	2.35056
23.76	2.41681	2.2802	23.76	1.76918	2.47366
23.78	2.42599	2.35891	23.78	1.83488	2.46368
23.8	2.56218	2.17329	23.8	1.73161	2.4383
23.82	2.60301	2.10284	23.82	1.77697	2.23539
23.84	2.65684	2.32316	23.84	1.75622	2.24878
23.86	2.7567	2.08971	23.86	1.67657	2.25531
23.88	2.68893	2.16093	23.88	1.62499	2.49123
23.9	2.63603	2.16656	23.9	1.74032	2.25784
23.92	2.58538	2.21754	23.92	1.74167	2.51739
23.94	2.59834	2.37565	23.94	1.74342	2.57412
23.96	2.71161	2.16737	23.96	1.69975	2.56589
23.98	2.91478	2.16561	23.98	1.78604	2.50822
24	2.75898	2.1051	24	1.67801	2.42338
24.02	2.78903	2.04899	24.02	1.70452	2.24823
24.04	2.85244	2.19583	24.04	1.73432	2.57507
24.06	2.79143	2.01807	24.06	1.73516	2.40248
24.08	2.81363	1.98793	24.08	1.6961	2.29612
24.1	2.92361	2.39328	24.1	1.81302	2.30423
24.12	2.80783	1.97748	24.12	1.72057	2.42616
24.14	2.80447	2.12426	24.14	1.7791	2.35827
24.16	2.77944	2.10059	24.16	1.73467	2.35097
24.18	2.83762	2.23646	24.18	1.72944	2.46815
24.2	2.83721	2.43629	24.2	1.77275	2.37262
24.22	2.7343	2.22475	24.22	1.77033	2.40145
24.24	2.77292	2.19241	24.24	1.75768	2.51092
24.26	2.8648	2.21914	24.26	1.7531	2.40825
24.28	2.90477	2.24575	24.28	1.78728	2.25969
24.3	2.93701	2.12639	24.3	1.72793	2.53769
24.32	2.91656	2.3794	24.32	1.70836	2.39654
24.34	2.93638	2.32056	24.34	1.73477	2.27054
24.36	2.85463	2.31241	24.36	1.64242	2.39692
24.38	2.89374	2.25117	24.38	1.66971	2.35904
24.4	2.87864	2.17837	24.4	1.67027	2.29137
24.42	2.84733	2.27785	24.42	1.7354	2.33738
24.44	2.91743	2.15957	24.44	1.65318	2.30774
24.46	2.91766	2.16639	24.46	1.71349	2.38422
24.48	2.98942	2.15649	24.48	1.8337	2.25121
24.5	3.04586	2.07611	24.5	1.66421	2.07972
24.52	2.98729	2.24006	24.52	1.77552	2.05805
24.54	3.11734	2.13115	24.54	1.70242	2.12543
24.56	3.069	2.23023	24.56	1.74038	2.40874
24.58	3.08304	2.04194	24.58	1.66101	2.35516
24.6	2.99354	2.28694	24.6	1.58071	2.33721
24.62	3.03266	2.28185	24.62	1.67151	2.33202
24.64	2.92455	2.05667	24.64	1.66928	2.62684
24.66	2.76743	1.98015	24.66	1.70873	2.39319
24.68	2.9341	2.25118	24.68	1.6512	2.39877
24.7	2.70594	2.34212	24.7	1.63576	2.4896
24.72	2.73488	2.19012	24.72	1.70858	2.48895
24.74	2.71787	2.33004	24.74	1.66845	2.50751
24.76	2.62135	2.22829	24.76	1.72126	2.51038
24.78	2.92077	2.19385	24.78	1.70151	2.54738
24.8	2.68958	2.24741	24.8	1.7974	2.65937
24.82	2.76141	2.03103	24.82	1.75669	2.32397
24.84	2.74445	2.07463	24.84	1.75927	2.64082
24.86	2.57035	2.34246	24.86	1.77225	2.48953
24.88	2.5933	2.32468	24.88	1.77815	2.29641
24.9	2.49525	2.12485	24.9	1.7634	2.45911
24.92	2.49867	1.95956	24.92	1.74698	2.29611
24.94	2.43965	2.07566	24.94	1.77426	2.28878
24.96	2.51381	2.0086	24.96	1.68903	2.26487
24.98	2.50647	2.17828	24.98	1.734	2.1738
25	2.56885	2.24884	25	1.79445	2.07767
25.02	2.37854	2.36712	25.02	1.76222	2.52149
25.04	2.47044	2.02976	25.04	1.7927	2.37152
25.06	2.61282	2.11235	25.06	1.68381	2.1864
25.08	2.59648	2.15368	25.08	1.55995	2.32228
25.1	2.47426	2.23497	25.1	1.66804	2.40754
25.12	2.43467	2.03557	25.12	1.63917	2.27003
25.14	2.4739	2.03052	25.14	1.69243	2.56888
25.16	2.56639	1.99463	25.16	1.70436	2.4441
25.18	2.54271	2.1269	25.18	1.79844	2.40251
25.2	2.52589	2.11839	25.2	1.66457	2.32198
25.22	2.62209	2.30125	25.22	1.71889	2.58154
25.24	2.64941	1.94908	25.24	1.74164	2.60137
25.26	2.79292	2.24483	25.26	1.7509	2.39038
25.28	2.78218	2.438	25.28	1.72554	2.27737
25.3	2.93999	2.11666	25.3	1.71267	2.06453
25.32	2.84758	2.18679	25.32	1.64055	2.07273
25.34	2.70935	2.11602	25.34	1.83833	2.3519
25.36	2.74139	2.20731	25.36	1.84057	2.43953
25.38	2.91397	2.21137	25.38	1.88712	2.06629
25.4	2.80185	2.18393	25.4	1.87664	2.17875
25.42	2.64732	2.3327	25.42	1.7706	2.2201
25.44	2.68407	2.22746	25.44	1.8436	2.33304
25.46	2.56181	2.20411	25.46	1.9514	2.11408
25.48	2.62718	2.04046	25.48	1.85989	2.26604
25.5	2.56682	2.23222	25.5	1.9179	2.15033
25.52	2.50454	2.32214	25.52	1.87024	2.10939
25.54	2.502	2.08436	25.54	1.87891	2.23159
25.56	2.4774	2.16744	25.56	1.84349	2.42743
25.58	2.47647	2.26207	25.58	1.82601	2.47934
25.6	2.56663	2.27938	25.6	1.80471	2.1052
25.62	2.65905	2.28508	25.62	1.8771	2.56401
25.64	2.62184	2.30145	25.64	1.85457	2.48215
25.66	2.61554	2.41377	25.66	1.73713	2.45752
25.68	2.51941	2.11944	25.68	1.94022	2.53634
25.7	2.4941	2.40835	25.7	1.78073	2.38587
25.72	2.71022	2.38403	25.72	1.86252	2.49376
25.74	2.69214	2.43603	25.74	1.87329	2.54346
25.76	2.78119	2.10381	25.76	1.85176	2.28658
25.78	2.8833	2.28169	25.78	1.88449	2.16826
25.8	2.74915	2.32853	25.8	1.91231	2.40498
25.82	2.7347	2.54616	25.82	1.92838	2.35638
25.84	2.90825	2.48483	25.84	1.86974	2.24809
25.86	2.92736	2.38269	25.86	1.83198	2.07738
25.88	2.7481	2.57113	25.88	1.7309	2.12817
25.9	2.80093	2.44716	25.9	1.76	2.14767
25.92	2.85401	2.32996	25.92	1.75645	2.18972
25.94	2.78167	2.50644	25.94	1.8021	2.33412
25.96	2.91379	2.44028	25.96	1.79552	2.59631
25.98	2.88851	2.30225	25.98	1.79012	2.44067
26	2.94319	2.3288	26	1.84463	2.4484
26.02	2.90467	2.53473	26.02	1.84445	2.23652
26.04	2.88055	2.39981	26.04	1.88679	2.44717
26.06	2.81726	2.29523	26.06	1.76681	2.33927
26.08	2.9434	2.26198	26.08	1.8542	2.76417
26.1	2.82053	2.44586	26.1	1.87813	2.07712
26.12	2.86015	2.30164	26.12	1.87095	2.23873
26.14	2.80028	2.47131	26.14	1.84323	2.32177
26.16	2.73615	2.45783	26.16	1.86495	2.51913
26.18	2.94854	2.59119	26.18	1.86996	2.48766
26.2	2.98005	2.43807	26.2	1.85554	2.38747
26.22	3.14002	2.39075	26.22	1.87155	2.4887
26.24	3.13292	2.20001	26.24	1.77249	2.21348
26.26	3.23268	2.39312	26.26	1.85055	2.31357
26.28	3.27152	2.59187	26.28	1.82252	2.21406
26.3	3.30158	2.40209	26.3	1.72035	2.22825
26.32	3.53909	2.52414	26.32	1.82152	2.45055
26.34	3.60969	2.47701	26.34	1.7131	2.29525
26.36	3.4112	2.39193	26.36	1.66841	2.46775
26.38	3.38031	2.39314	26.38	1.7072	2.39703
26.4	3.41839	2.43225	26.4	1.78356	2.45514
26.42	3.37248	2.46851	26.42	1.75514	2.6686
26.44	3.35679	2.36716	26.44	1.72032	2.47859
26.46	3.37878	2.51472	26.46	1.81232	2.44434
26.48	3.43879	2.42027	26.48	1.7996	2.35611
26.5	3.43249	2.3533	26.5	1.84778	2.43325
26.52	3.59533	2.48976	26.52	1.88252	2.49292
26.54	3.63802	2.34809	26.54	1.92182	2.5465
26.56	3.55745	2.52192	26.56	1.86288	2.35697
26.58	3.62158	2.53018	26.58	1.69864	2.23639
26.6	3.72726	2.39488	26.6	1.70698	2.48444
26.62	3.54635	2.24464	26.62	1.78688	2.41161
26.64	3.44475	2.1085	26.64	1.78359	2.31391
26.66	3.48923	2.20994	26.66	1.82226	2.36865
26.68	3.53085	2.00233	26.68	1.83199	2.47694
26.7	3.7016	2.10864	26.7	1.78135	2.35434
26.72	3.55057	2.15991	26.72	1.94606	2.51959
26.74	3.45998	2.07226	26.74	1.88474	2.44601
26.76	3.25526	2.05114	26.76	1.87315	2.63723
26.78	3.31184	2.36068	26.78	1.90255	2.63223
26.8	3.22663	2.36995	26.8	1.808	2.44476
26.82	3.17221	2.15039	26.82	1.94792	2.55868
26.84	3.18976	2.15515	26.84	1.8482	2.39286
26.86	3.10382	2.23437	26.86	1.88264	2.52527
26.88	3.15881	2.32693	26.88	1.82021	2.61089
26.9	2.83885	2.26716	26.9	1.78348	2.35894
26.92	2.86315	2.23357	26.92	1.81599	2.33363
26.94	2.81065	2.19984	26.94	1.87893	2.36845
26.96	2.76761	2.51193	26.96	1.90606	2.53637
26.98	2.91182	2.15545	26.98	1.90405	2.4114
27	3.03605	2.15629	27	1.8547	2.51233
27.02	2.87981	2.33678	27.02	1.88386	2.58655
27.04	2.88005	2.0496	27.04	1.98028	2.47646
27.06	3.04845	2.28918	27.06	1.94267	2.49273
27.08	2.99124	2.32928	27.08	1.89827	2.57347
27.1	2.81752	2.28468	27.1	1.98541	2.55285
27.12	2.86981	2.29957	27.12	2.0347	2.60123
27.14	3.01571	2.37432	27.14	1.98682	2.32682
27.16	3.03736	2.08179	27.16	1.91774	2.09043
27.18	2.92114	2.28463	27.18	1.80999	2.29377
27.2	2.94029	2.3102	27.2	1.88998	2.61724
27.22	2.94605	2.29159	27.22	1.92963	2.34165
27.24	3.01523	2.33815	27.24	1.8643	2.46215
27.26	3.12872	2.31257	27.26	1.84864	2.38995
27.28	3.05753	2.34959	27.28	1.88063	2.48539
27.3	3.09105	2.11805	27.3	2.0436	2.39555
27.32	3.19752	2.19401	27.32	1.91689	2.55638
27.34	3.14626	2.30815	27.34	1.82192	2.64116
27.36	3.14081	2.25049	27.36	1.88052	2.13676
27.38	3.29283	2.29313	27.38	1.80797	2.23362
27.4	3.34457	2.06658	27.4	1.7733	2.26213
27.42	3.3075	2.29836	27.42	1.74794	2.49316
27.44	3.28288	2.06898	27.44	1.80563	2.31696
27.46	3.23023	2.03163	27.46	1.7869	2.45995
27.48	3.27207	2.10968	27.48	1.91128	2.48454
27.5	3.08734	2.22831	27.5	1.82685	2.32595
27.52	3.13046	2.26072	27.52	1.8135	2.41633
27.54	3.15052	2.38764	27.54	1.80958	2.54224
27.56	3.24814	2.32424	27.56	1.72721	2.18332
27.58	3.32091	2.16628	27.58	1.88934	2.49331
27.6	3.35241	2.22454	27.6	1.72802	2.18988
27.62	3.35226	2.37616	27.62	1.75885	2.5546
27.64	3.38928	2.23842	27.64	1.73038	2.22717
27.66	3.59689	2.29627	27.66	1.70415	2.28745
27.68	3.4616	2.30853	27.68	1.70454	2.27174
27.7	3.33923	2.31056	27.7	1.66903	1.96023
27.72	3.29791	2.29731	27.72	1.69084	2.34193
27.74	3.09669	2.48	27.74	1.76369	2.30318
27.76	3.06907	2.44485	27.76	1.72101	2.51858
27.78	3.17325	2.26786	27.78	1.71923	2.24516
27.8	3.12691	2.53206	27.8	1.74433	2.26409
27.82	2.86736	2.39554	27.82	1.72786	2.12461
27.84	3.06474	2.26789	27.84	1.62202	2.11691
27.86	2.88495	2.33814	27.86	1.75956	2.34961
27.88	2.98636	2.40867	27.88	1.77646	2.56378
27.9	2.96212	2.34154	27.9	1.71772	2.38515
27.92	2.92444	2.43655	27.92	1.77408	2.38702
27.94	3.00027	2.33946	27.94	1.729	2.31203
27.96	2.99523	2.39528	27.96	1.73023	2.16331
27.98	3.09146	2.43053	27.98	1.67329	2.56272
28	3.13019	2.49383	28	1.6981	2.15635
28.02	3.0933	2.46789	28.02	1.82155	2.27754
28.04	3.10129	2.47129	28.04	1.77476	2.26643
28.06	3.13207	2.54267	28.06	1.83751	2.29095
28.08	3.11022	2.39027	28.08	1.89249	2.18492
28.1	3.10111	2.50319	28.1	1.87275	2.38638
28.12	3.13209	2.39081	28.12	1.78595	2.43417
28.14	3.13605	2.45027	28.14	1.7496	2.15795
28.16	3.14923	2.5697	28.16	1.77325	2.39749
28.18	3.1998	2.40423	28.18	1.84465	2.44483
28.2	3.32107	2.35583	28.2	1.74653	2.17526
28.22	3.28668	2.44453	28.22	1.74515	2.45713
28.24	3.32534	2.45514	28.24	1.8224	2.20751
28.26	3.16489	2.40551	28.26	1.74874	2.38498
28.28	3.11286	2.51136	28.28	1.80197	2.33751
28.3	3.34224	2.5949	28.3	1.73933	2.5465
28.32	3.27564	2.5535	28.32	1.73267	2.30597
28.34	3.19353	2.23451	28.34	1.90335	2.28131
28.36	3.25858	2.37689	28.36	1.8974	2.40195
28.38	3.21373	2.00497	28.38	1.90756	2.28488
28.4	3.22359	2.12621	28.4	1.82265	2.01343
28.42	3.21119	2.23918	28.42	1.78468	2.39015
28.44	3.34611	2.32789	28.44	1.80266	1.97164
28.46	3.34091	2.35302	28.46	1.76017	2.09604
28.48	3.31741	2.1214	28.48	1.83096	2.34279
28.5	3.20278	2.06516	28.5	1.8166	2.2471
28.52	3.25952	2.15943	28.52	1.8664	2.36842
28.54	3.16244	2.3695	28.54	1.78482	2.36484
28.56	3.18089	2.1118	28.56	1.7436	2.37952
28.58	3.313	1.98064	28.58	1.79483	2.28722
28.6	3.36035	2.20892	28.6	1.76489	2.2374
28.62	3.40709	2.35188	28.62	1.76176	2.33465
28.64	3.43239	2.35026	28.64	1.72401	2.16533
28.66	3.64753	2.62006	28.66	1.71622	2.41858
28.68	3.50139	2.32911	28.68	1.78668	2.6197
28.7	3.45987	2.37372	28.7	1.82512	2.52653
28.72	3.44531	2.14796	28.72	1.86033	2.33901
28.74	3.40154	2.34186	28.74	1.8398	2.59112
28.76	3.47808	2.51791	28.76	1.69182	2.58743
28.78	3.47543	2.41531	28.78	1.75038	2.35112
28.8	3.37282	2.28705	28.8	1.79201	2.32582
28.82	3.40016	2.2257	28.82	1.66637	2.20375
28.84	3.38469	1.91028	28.84	1.78528	2.75845
28.86	3.48474	2.54004	28.86	1.96469	2.67253
28.88	3.39803	2.40605	28.88	1.8198	2.57667
28.9	3.43827	2.10003	28.9	1.86772	2.26137
28.92	3.32473	2.53716	28.92	1.87272	2.30419
28.94	3.46558	2.59432	28.94	1.85915	2.43204
28.96	3.42423	2.33831	28.96	1.7887	2.26494
28.98	3.3207	2.27778	28.98	1.6807	2.4545
29	3.26794	2.48984	29	1.77164	2.31494
29.02	3.28152	2.25438	29.02	1.77963	2.60735
29.04	3.4145	2.50486	29.04	1.72092	2.49994
29.06	3.4325	2.2717	29.06	1.81324	2.38628
29.08	3.40069	2.74162	29.08	1.84714	2.40937
29.1	3.42282	2.48079	29.1	1.76507	2.33488
29.12	3.40734	2.5067	29.12	1.85971	2.2197
29.14	3.35236	2.17307	29.14	1.87898	2.28933
29.16	3.41485	2.38638	29.16	1.81633	2.39137
29.18	3.51258	2.28816	29.18	1.78946	2.56037
29.2	3.5081	2.24229	29.2	1.85483	2.36599
29.22	3.45319	2.17586	29.22	1.83106	2.20429
29.24	3.4511	2.22203	29.24	1.80857	2.13284
29.26	3.44787	2.2418	29.26	1.85623	2.19707
29.28	3.55113	2.51851	29.28	1.84959	2.20687
29.3	3.43321	2.50948	29.3	1.83083	2.14026
29.32	3.40939	2.42387	29.32	1.89155	2.14461
29.34	3.38648	2.26001	29.34	1.91747	2.36873
29.36	3.36288	2.39412	29.36	1.91557	2.1544
29.38	3.33234	2.56779	29.38	1.82276	2.40492
29.4	3.40708	2.53025	29.4	1.90658	2.51745
29.42	3.4595	2.54825	29.42	1.95123	2.34262
29.44	3.38517	2.41513	29.44	1.93475	2.66529
29.46	3.48261	2.32374	29.46	1.90062	2.39291
29.48	3.44975	2.24073	29.48	1.84786	2.33291
29.5	3.53104	2.08663	29.5	1.89593	2.37157
29.52	3.40213	2.21291	29.52	1.93545	2.52395
29.54	3.41083	2.19438	29.54	1.85945	2.32677
29.56	3.53589	2.19693	29.56	1.85658	2.56411
29.58	3.47452	2.16123	29.58	1.81139	2.33982
29.6	3.45994	2.17008	29.6	1.7456	2.31369
29.62	3.43129	2.2443	29.62	1.76864	2.2533
29.64	3.38378	2.16925	29.64	1.80654	2.35455
29.66	3.45555	2.22852	29.66	1.7982	2.21165
29.68	3.40503	2.23739	29.68	1.84668	2.3286
29.7	3.37837	2.26387	29.7	1.81396	2.49952
29.72	3.38003	2.36361	29.72	1.98138	2.57324
29.74	3.42389	2.19829	29.74	1.8056	2.57987
29.76	3.46917	2.41365	29.76	1.79767	2.54138
29.78	3.31252	1.99631	29.78	1.82054	2.66185
29.8	3.34633	2.21806	29.8	1.78291	2.44009
29.82	3.34283	2.11671	29.82	1.92268	2.37606
29.84	3.37306	2.1289	29.84	1.84272	2.54035
29.86	3.38432	2.29722	29.86	1.83383	2.7553
29.88	3.33729	2.23695	29.88	1.8409	2.38119
29.9	3.35135	2.11482	29.9	1.80668	2.36013
29.92	3.25357	2.42551	29.92	1.77314	2.23637
29.94	3.38295	2.20849	29.94	1.73956	2.3418
29.96	3.37411	2.10329	29.96	1.75688	2.3574
29.98	3.35221	2.26812	29.98	1.78066	2.43095
30	3.42105	2.20163	30	1.83008	2.30874
30.02	3.34212	2.25487	30.02	1.83415	2.41347
30.04	3.38523	1.90283	30.04	1.91135	2.52619
30.06	3.41052	2.11453	30.06	1.78577	2.37523
30.08	3.31017	2.15353	30.08	1.8287	2.39538
30.1	3.36554	2.29476	30.1	1.79982	2.41448
30.12	3.21751	2.40301	30.12	1.82744	2.34686
30.14	3.27643	1.96292	30.14	1.91881	2.11991
30.16	3.28137	2.39966	30.16	1.8862	2.4348
30.18	3.35057	2.31691	30.18	1.91498	2.37609
30.2	3.36607	2.54474	30.2	1.82622	2.46984
30.22	3.35689	2.36316	30.22	1.8189	2.36469
30.24	3.29999	2.50406	30.24	1.83334	2.24691
30.26	3.44578	2.33655	30.26	1.85634	2.41361
30.28	3.39144	2.42705	30.28	1.83606	2.22749
30.3	3.30961	2.37307	30.3	1.81236	2.36367
30.32	3.38136	2.43907	30.32	1.80124	2.35525
30.34	3.28639	2.35102	30.34	1.6894	2.38019
30.36	3.34835	2.364	30.36	1.7753	2.24396
30.38	3.27714	2.23345	30.38	1.78882	2.3155
30.4	3.22353	2.36399	30.4	1.79974	2.46025
30.42	3.09391	2.28507	30.42	1.85485	2.28284
30.44	3.14058	2.28591	30.44	1.92874	2.28413
30.46	3.06502	2.21116	30.46	1.92736	2.39644
30.48	3.04584	2.19812	30.48	1.77008	2.55989
30.5	3.1113	2.19853	30.5	1.83912	2.22737
30.52	3.08665	2.27014	30.52	1.86464	2.29044
30.54	3.12665	2.13844	30.54	1.82121	2.31561
30.56	3.01793	2.13088	30.56	1.8412	2.44683
30.58	3.07942	2.07643	30.58	1.80392	2.39859
30.6	3.12708	2.15928	30.6	1.78891	2.28173
30.62	3.21138	2.09976	30.62	1.94528	2.29528
30.64	3.15488	2.43929	30.64	1.80069	2.50476
30.66	3.0917	2.25241	30.66	1.73656	2.03565
30.68	3.24996	2.35704	30.68	1.74023	2.30594
30.7	3.221	2.00146	30.7	1.8094	2.29109
30.72	3.15646	2.17878	30.72	1.81574	2.57475
30.74	3.19085	2.0268	30.74	1.82635	2.43433
30.76	3.19329	2.1031	30.76	1.91439	2.58496
30.78	3.18866	2.11887	30.78	1.79193	2.35267
30.8	3.22334	2.07823	30.8	1.88638	2.41318
30.82	3.14025	2.2042	30.82	1.77637	2.44306
30.84	2.95153	2.1289	30.84	1.81188	2.42658
30.86	3.03438	2.1823	30.86	1.73452	2.43227
30.88	3.12816	2.17055	30.88	1.7825	2.42698
30.9	3.14651	2.05726	30.9	1.87263	2.09102
30.92	3.1342	2.18779	30.92	1.92313	2.38691
30.94	3.15634	2.16877	30.94	1.82015	2.49575
30.96	3.07501	2.24751	30.96	1.92273	2.42865
30.98	3.08227	2.23368	30.98	1.96539	2.38117
31	3.02412	2.17114	31	1.89591	2.4064
31.02	3.04565	2.03121	31.02	1.83166	2.46084
31.04	3.12707	2.04323	31.04	1.7985	2.48878
31.06	3.23836	2.12092	31.06	1.8094	2.41901
31.08	3.22208	2.15733	31.08	1.71771	2.19403
31.1	3.21465	2.08789	31.1	1.72019	2.30394
31.12	3.13585	2.15055	31.12	1.75668	2.19304
31.14	3.12097	2.07349	31.14	1.80597	2.58949
31.16	3.13383	2.10988	31.16	1.81025	2.66537
31.18	3.15318	2.03801	31.18	1.85843	2.60874
31.2	3.00419	2.00036	31.2	1.78877	2.25732
31.22	3.07489	2.35578	31.22	1.75718	2.23225
31.24	3.05373	2.23781	31.24	1.79077	2.30798
31.26	3.17514	2.10977	31.26	1.78445	2.3646
31.28	3.08471	2.14538	31.28	1.78365	2.34889
31.3	3.14604	2.22475	31.3	1.75065	2.41151
31.32	3.13217	2.09698	31.32	1.87855	2.28642
31.34	3.07116	2.32667	31.34	1.83426	2.452
31.36	3.08339	2.34557	31.36	1.76313	2.66312
31.38	3.04473	2.08302	31.38	1.80079	2.31242
31.4	3.17825	2.18683	31.4	1.85467	2.47213
31.42	3.10628	2.10591	31.42	1.85682	2.407
31.44	3.08398	2.02078	31.44	1.8145	2.32629
31.46	3.27588	2.13822	31.46	1.84944	2.42146
31.48	3.20402	2.05862	31.48	1.7373	2.64093
31.5	3.1153	2.13812	31.5	1.86918	2.37944
31.52	3.19605	2.21522	31.52	1.86103	2.27137
31.54	3.10491	2.11871	31.54	1.82706	2.38918
31.56	3.09813	2.09161	31.56	1.85328	2.23937
31.58	3.20797	2.19808	31.58	1.80432	2.37762
31.6	3.21222	2.12795	31.6	1.88312	2.33372
31.62	3.20765	2.10458	31.62	1.81262	2.18059
31.64	3.20538	2.04366	31.64	1.92483	2.49708
31.66	3.29004	2.06507	31.66	1.85475	2.58992
31.68	3.24885	2.10558	31.68	1.81752	2.4581
31.7	3.17375	2.32054	31.7	1.86629	2.29698
31.72	3.16271	2.06818	31.72	1.83053	2.48327
31.74	3.1628	1.98822	31.74	1.81102	2.62198
31.76	3.13471	2.06834	31.76	1.86526	2.20522
31.78	3.14742	2.23707	31.78	1.79751	2.21397
31.8	3.15578	2.1163	31.8	1.86667	2.45589
31.82	3.18588	2.08494	31.82	1.92496	2.49122
31.84	3.19594	2.03051	31.84	1.86202	2.42628
31.86	3.26302	2.21757	31.86	1.92322	2.34674
31.88	3.2252	2.04398	31.88	1.86462	2.32985
31.9	3.32602	2.0214	31.9	1.82939	2.24468
31.92	3.36061	2.15918	31.92	1.85223	2.33192
31.94	3.3434	2.10047	31.94	1.91544	2.37919
31.96	3.35306	2.16753	31.96	1.86464	2.36681
31.98	3.39555	2.16054	31.98	1.93607	2.33233
32	3.2916	2.27473	32	1.84697	2.66234
32.02	3.28143	2.10663	32.02	1.88577	2.39465
32.04	3.38931	2.11724	32.04	1.87663	2.3455
32.06	3.36213	2.24327	32.06	1.88521	2.4826
32.08	3.37874	2.19116	32.08	1.9557	2.48714
32.1	3.35242	2.18187	32.1	1.98203	2.49341
32.12	3.35816	2.0188	32.12	1.88451	2.45842
32.14	3.3891	2.31373	32.14	1.93409	2.31539
32.16	3.3994	2.1114	32.16	1.98219	2.30524
32.18	3.3253	2.15312	32.18	1.96383	1.98597
32.2	3.17368	1.92335	32.2	1.9255	2.44227
32.22	3.22873	2.32126	32.22	1.875	2.32517
32.24	3.20596	2.14947	32.24	1.91227	2.45296
32.26	3.28081	2.30879	32.26	1.82538	2.65721
32.28	3.26681	2.20145	32.28	1.81237	2.50795
32.3	3.24105	2.17685	32.3	1.89992	2.45009
32.32	3.3068	2.42577	32.32	1.8451	2.56663
32.34	3.26797	2.26004	32.34	1.80194	2.46227
32.36	3.20504	2.42211	32.36	1.78636	2.58798
32.38	3.20409	2.38134	32.38	1.88944	2.35551
32.4	3.16628	2.35492	32.4	1.84214	2.24806
32.42	3.28588	2.36922	32.42	1.86491	2.49625
32.44	3.18662	2.27562	32.44	1.85074	2.37816
32.46	3.33088	2.2094	32.46	1.86686	2.53183
32.48	3.22595	2.22572	32.48	1.78074	2.41267
32.5	3.23493	2.22681	32.5	1.77773	2.26383
32.52	3.16712	2.48353	32.52	1.83734	2.53655
32.54	3.1661	2.46591	32.54	1.82142	2.14024
32.56	3.14325	2.3999	32.56	1.88187	2.31813
32.58	3.23973	2.47792	32.58	1.82005	2.29946
32.6	3.23259	2.104	32.6	1.84813	2.11393
32.62	3.29369	2.45557	32.62	1.80981	2.24494
32.64	3.32333	2.3015	32.64	1.82882	2.4116
32.66	3.19941	2.19451	32.66	1.89971	2.56195
32.68	3.23731	2.14713	32.68	1.84301	2.55919
32.7	3.23384	1.97992	32.7	1.91434	2.70336
32.72	3.23903	2.49137	32.72	1.75893	2.38755
32.74	3.12724	2.0894	32.74	1.86098	2.3932
32.76	3.12624	2.24903	32.76	1.94024	2.49719
32.78	3.13575	2.52878	32.78	1.92821	2.70044
32.8	3.13119	2.33827	32.8	1.97007	2.50855
32.82	3.12162	2.52603	32.82	1.9852	2.27739
32.84	3.13949	2.51432	32.84	1.89202	2.09008
32.86	3.16394	2.5027	32.86	1.95519	2.40195
32.88	3.12706	2.41617	32.88	1.87564	2.48681
32.9	3.03223	2.16008	32.9	1.96096	2.11046
32.92	3.04944	2.40003	32.92	2.03982	2.37525
32.94	2.99072	2.44191	32.94	1.92948	2.57621
32.96	2.97047	2.40641	32.96	1.86785	2.26021
32.98	2.9693	2.0505	32.98	1.89224	2.23332
33	3.13749	2.29417	33	1.96078	2.5415
33.02	3.18567	2.34768	33.02	1.93354	2.58606
33.04	3.1144	2.1311	33.04	1.9532	2.17771
33.06	3.04283	2.07743	33.06	1.86715	2.32349
33.08	3.06171	2.21609	33.08	1.97575	2.20493
33.1	3.0692	2.33305	33.1	1.90295	2.36697
33.12	3.2256	2.44565	33.12	1.86841	2.14261
33.14	3.08803	2.5115	33.14	1.94028	2.24772
33.16	3.01443	2.51739	33.16	1.91954	2.65006
33.18	2.97165	2.3572	33.18	1.83508	2.63966
33.2	2.94221	2.33014	33.2	1.89342	2.39046
33.22	2.96508	2.60245	33.22	1.89352	2.37166
33.24	2.90624	2.43949	33.24	1.8844	2.40521
33.26	2.85524	2.33717	33.26	1.91574	2.29392
33.28	2.91167	2.42349	33.28	1.90948	2.15773
33.3	3.05939	2.30397	33.3	1.92457	2.26992
33.32	3.22682	2.46587	33.32	1.85551	2.54158
33.34	3.12144	2.19392	33.34	1.85308	2.39047
33.36	3.26167	2.51794	33.36	1.87949	2.18589
33.38	3.25218	2.17407	33.38	1.84035	2.53478
33.4	3.25088	2.38183	33.4	1.95034	2.44576
33.42	3.23738	2.37079	33.42	1.96722	2.39194
33.44	3.20108	2.51743	33.44	1.99206	2.51585
33.46	3.18797	2.28015	33.46	1.95553	2.51836
33.48	3.30742	2.22941	33.48	1.9014	2.2348
33.5	3.36433	2.27963	33.5	1.89636	2.47623
33.52	3.27833	2.41332	33.52	1.90254	2.38642
33.54	3.30451	2.44144	33.54	1.99046	2.45379
33.56	3.24024	2.43908	33.56	1.93582	2.52002
33.58	3.10359	2.56833	33.58	1.99867	2.34679
33.6	3.04386	2.51969	33.6	1.97785	2.22338
33.62	3.0119	2.36815	33.62	1.98923	2.32047
33.64	3.12488	2.414	33.64	1.95256	2.28653
33.66	3.08076	2.45472	33.66	1.9176	2.14208
33.68	3.15877	2.57842	33.68	1.93918	2.48956
33.7	3.21473	2.40651	33.7	1.83711	2.45869
33.72	3.37587	2.59572	33.72	1.88408	2.43291
33.74	3.34679	2.46008	33.74	1.83663	2.34251
33.76	3.20421	2.18367	33.76	1.87493	2.23895
33.78	3.08653	2.42526	33.78	1.82844	2.56473
33.8	3.06093	2.63716	33.8	1.86377	2.32726
33.82	3.01962	2.58629	33.82	1.88845	2.15697
33.84	3.05003	2.50308	33.84	1.90266	2.63322
33.86	2.93175	2.53477	33.86	1.89046	2.39106
33.88	2.96126	2.69275	33.88	1.99624	2.36961
33.9	2.95567	2.4805	33.9	1.92622	2.30043
33.92	2.9037	2.46207	33.92	1.98897	2.33403
33.94	3.02991	2.36078	33.94	1.87455	2.30192
33.96	2.96501	2.15132	33.96	1.95592	2.31352
33.98	2.93847	2.48252	33.98	1.92963	2.15398
34	2.84882	2.31125	34	1.94492	2.3049
34.02	2.94584	2.1932	34.02	1.92735	2.23888
34.04	2.96871	2.24003	34.04	1.92077	2.29167
34.06	2.87034	2.25544	34.06	1.84357	2.54743
34.08	2.98919	2.05029	34.08	1.82142	2.61622
34.1	2.97522	1.9856	34.1	1.75231	2.31803
34.12	3.08757	2.11216	34.12	1.79776	2.35491
34.14	3.0397	2.05104	34.14	1.86237	2.52699
34.16	2.96665	2.29256	34.16	1.85288	2.43876
34.18	2.92006	2.48255	34.18	1.85575	2.56358
34.2	3.0122	2.1973	34.2	1.84158	2.54965
34.22	2.92198	2.21833	34.22	1.74352	2.50032
34.24	3.0152	2.03731	34.24	1.80928	2.38806
34.26	2.9297	2.00793	34.26	1.76594	2.27934
34.28	2.88289	1.98556	34.28	1.81401	2.52004
34.3	2.9084	2.35075	34.3	1.86728	2.41741
34.32	2.98445	2.28506	34.32	1.84043	2.24151
34.34	3.01925	2.13914	34.34	1.95567	2.28845
34.36	2.98462	2.22307	34.36	1.91411	2.63902
34.38	3.02112	2.28989	34.38	1.82616	2.29412
34.4	2.91983	2.00109	34.4	1.70257	2.43485
34.42	2.99041	2.30182	34.42	1.76208	2.11727
34.44	2.88603	2.49722	34.44	1.75084	2.61619
34.46	2.97089	2.46656	34.46	1.80217	2.56038
34.48	2.95347	2.26786	34.48	1.88825	2.28292
34.5	3.01924	2.14924	34.5	1.91921	2.45682
34.52	2.97139	2.40957	34.52	1.94721	2.29304
34.54	3.15565	2.35175	34.54	1.93573	2.25505
34.56	3.11128	2.1494	34.56	2.03581	2.45272
34.58	3.2186	2.26837	34.58	1.92938	2.26459
34.6	3.107	2.65828	34.6	1.89507	2.36029
34.62	2.93737	2.60956	34.62	1.95438	2.40303
34.64	3.07777	2.56836	34.64	1.83782	2.36287
34.66	3.0826	2.5376	34.66	1.91567	2.32147
34.68	2.98904	2.27586	34.68	1.79283	2.37811
34.7	3.09071	2.5857	34.7	1.8158	2.36046
34.72	3.0472	2.53205	34.72	1.85192	2.21642
34.74	3.03782	2.18549	34.74	1.78359	2.26079
34.76	3.1527	2.32228	34.76	1.98221	2.30295
34.78	3.05326	2.44472	34.78	1.81112	2.368
34.8	3.08986	2.33901	34.8	1.81741	2.46535
34.82	3.30791	2.4289	34.82	1.93151	2.49618
34.84	3.16305	2.45248	34.84	1.85909	2.50402
34.86	3.16657	2.47405	34.86	1.84436	2.37153
34.88	3.13549	2.18098	34.88	1.83549	2.47246
34.9	3.02479	2.1872	34.9	1.85367	2.36897
34.92	3.01563	2.17682	34.92	1.98284	2.62836
34.94	3.10407	2.38955	34.94	1.9356	2.45871
34.96	3.15696	2.41773	34.96	1.94061	2.34999
34.98	3.06115	2.60424	34.98	1.95994	2.49101
35	3.01886	2.4028	35	1.94846	2.27971
35.02	3.06647	2.35041	35.02	1.99122	2.34341
35.04	3.03292	2.34746	35.04	1.96621	2.03851
35.06	3.03224	2.47864	35.06	2.07913	2.24236
35.08	3.25162	2.45906	35.08	2.08598	2.54019
35.1	3.31596	2.60771	35.1	2.12352	2.45764
35.12	3.21126	2.30594	35.12	1.94753	2.4476
35.14	3.24154	2.46314	35.14	2.04426	2.39342
35.16	3.14054	2.25476	35.16	2.04218	2.33431
35.18	3.27908	2.57917	35.18	2.10548	2.47337
35.2	3.21023	2.51739	35.2	2.00965	2.36879
35.22	3.15737	2.39938	35.22	1.98684	2.3078
35.24	3.17988	2.25604	35.24	1.95596	2.30724
35.26	3.12335	2.26485	35.26	2.08664	2.29583
35.28	3.15507	2.21068	35.28	2.06404	2.34786
35.3	3.02608	2.33884	35.3	2.0259	2.46451
35.32	3.0781	2.38083	35.32	2.00682	2.46257
35.34	3.15183	2.3693	35.34	1.98941	2.25864
35.36	3.18698	2.46867	35.36	1.95543	2.38624
35.38	3.20128	2.34203	35.38	1.99117	2.36514
35.4	3.31617	2.41593	35.4	2.03689	2.27625
35.42	3.21605	2.36395	35.42	2.00034	2.3505
35.44	3.28733	2.39694	35.44	2.01868	2.27409
35.46	3.26017	2.60102	35.46	2.07196	2.30807
35.48	3.34212	2.4146	35.48	1.97845	2.25781
35.5	3.30793	2.09225	35.5	2.04766	2.42998
35.52	3.31732	2.50915	35.52	2.10752	2.39719
35.54	3.26031	2.30182	35.54	2.14997	2.3802
35.56	3.52435	2.50322	35.56	2.05874	2.34456
35.58	3.43565	2.03419	35.58	1.89939	2.3979
35.6	3.42459	2.24808	35.6	1.88916	2.08082
35.62	3.35242	2.41422	35.62	1.80704	2.43902
35.64	3.32949	2.48092	35.64	1.90664	2.42993
35.66	3.37763	2.60063	35.66	1.88947	2.30101
35.68	3.22862	2.2571	35.68	1.92802	2.07332
35.7	3.33236	2.33742	35.7	1.82847	2.3508
35.72	3.40829	2.33714	35.72	1.93125	2.47671
35.74	3.48609	2.17184	35.74	1.85499	2.38728
35.76	3.49263	2.4399	35.76	1.89502	2.35372
35.78	3.34122	2.46418	35.78	1.87187	2.24638
35.8	3.27443	2.57506	35.8	2.01566	2.19843
35.82	3.30617	2.47265	35.82	2.02695	2.19276
35.84	3.2072	2.35424	35.84	2.00755	2.26302
35.86	3.22584	2.31279	35.86	2.01036	2.29668
35.88	3.35426	2.2571	35.88	1.90212	2.61331
35.9	3.39991	2.31157	35.9	1.87559	2.5765
35.92	3.54193	2.11782	35.92	1.8988	2.19343
35.94	3.52529	2.42001	35.94	1.92116	2.61269
35.96	3.48874	2.36763	35.96	1.89884	2.40848
35.98	3.37288	2.11376	35.98	1.96251	2.22167
36	3.45706	1.87199	36	1.98886	2.35713
36.02	3.4843	2.3857	36.02	1.97698	2.40523
36.04	3.44313	2.30204	36.04	1.80507	2.42659
36.06	3.30588	2.42359	36.06	1.88764	2.4957
36.08	3.51487	2.52499	36.08	1.90863	2.43556
36.1	3.41112	2.32703	36.1	1.95927	2.18261
36.12	3.42915	2.53975	36.12	1.93179	2.31916
36.14	3.43968	2.1643	36.14	1.89874	2.53726
36.16	3.32311	2.44809	36.16	1.85253	2.37495
36.18	3.41364	2.40158	36.18	1.86657	2.37465
36.2	3.40083	2.54782	36.2	1.93602	2.35161
36.22	3.35443	2.41061	36.22	1.89646	2.37727
36.24	3.28626	2.17701	36.24	1.8772	2.45411
36.26	3.34666	2.37405	36.26	1.77647	2.44084
36.28	3.45707	2.24516	36.28	1.83077	2.69921
36.3	3.43954	2.35838	36.3	1.89802	2.37461
36.32	3.32804	2.19138	36.32	1.95403	2.4035
36.34	3.29986	2.29945	36.34	1.88429	2.41177
36.36	3.39426	2.56956	36.36	1.96574	2.57426
36.38	3.24178	2.12812	36.38	1.96283	2.57245
36.4	3.33766	2.40701	36.4	1.85247	2.47808
36.42	3.45926	2.28165	36.42	1.9355	2.38255
36.44	3.52353	2.56896	36.44	1.91873	2.29528
36.46	3.47934	2.37281	36.46	1.91444	2.61013
36.48	3.46717	2.22752	36.48	1.9618	2.37479
36.5	3.45035	2.40574	36.5	1.9108	2.52371
36.52	3.39317	2.41807	36.52	1.95312	2.59649
36.54	3.30464	2.3691	36.54	1.91756	2.42211
36.56	3.2013	2.39258	36.56	1.85602	2.45584
36.58	3.16779	2.48184	36.58	2.02199	2.55955
36.6	3.23747	2.18539	36.6	1.9406	2.55112
36.62	3.17048	2.27979	36.62	1.93086	2.56435
36.64	3.12957	2.39256	36.64	1.93712	2.33817
36.66	3.17741	2.18212	36.66	1.88441	2.55524
36.68	3.26813	2.49028	36.68	1.89059	2.52869
36.7	3.15614	2.50097	36.7	1.92119	2.547
36.72	3.15542	2.54071	36.72	1.82736	2.40904
36.74	3.20803	2.35149	36.74	1.90171	2.34356
36.76	3.20873	2.49873	36.76	1.98355	2.40185
36.78	3.17833	2.50401	36.78	2.0186	2.30666
36.8	3.08671	2.31412	36.8	2.05414	2.42832
36.82	3.11654	2.63608	36.82	1.9205	2.32415
36.84	3.05508	2.48851	36.84	2.10996	2.25435
36.86	3.10841	2.52701	36.86	2.00974	2.2496
36.88	3.0968	2.39402	36.88	1.9552	2.4256
36.9	3.18788	2.46994	36.9	1.80574	2.31979
36.92	3.18495	2.35583	36.92	1.97052	2.37804
36.94	3.05229	2.15437	36.94	1.97233	2.37094
36.96	3.03393	2.24271	36.96	2.03091	2.43494
36.98	3.05861	2.38612	36.98	1.8199	2.51974
37	3.16392	1.96707	37	1.8978	2.2987
37.02	3.14159	2.09358	37.02	1.8966	2.28158
37.04	3.12107	2.21249	37.04	1.966	2.54404
37.06	3.18033	2.42889	37.06	2.04667	2.46441
37.08	3.18766	2.33413	37.08	1.91858	2.47693
37.1	3.17679	2.38067	37.1	2.00082	2.27783
37.12	3.21785	2.30445	37.12	1.8576	2.26254
37.14	3.12577	2.50378	37.14	1.91119	2.16224
37.16	3.11404	2.33873	37.16	1.91904	2.2477
37.18	3.08304	2.2887	37.18	1.85198	2.51184
37.2	3.05031	2.41892	37.2	1.94147	2.3445
37.22	3.20271	1.97838	37.22	1.90669	2.52544
37.24	3.16559	2.31972	37.24	1.95935	2.4991
37.26	3.08696	2.56983	37.26	1.93731	2.03541
37.28	3.18712	2.03171	37.28	1.95085	2.14203
37.3	3.16249	2.22086	37.3	1.98961	2.33476
37.32	3.0733	2.45591	37.32	1.91316	2.28595
37.34	3.1772	2.37607	37.34	1.94011	2.645
37.36	3.12938	2.51608	37.36	1.84327	2.32545
37.38	3.07965	2.41584	37.38	1.85058	2.2913
37.4	3.07161	2.4749	37.4	1.8715	2.43101
37.42	3.27069	2.37525	37.42	1.85939	2.41729
37.44	3.37986	2.37355	37.44	1.81739	2.38783
37.46	3.38082	2.39517	37.46	1.87925	1.97362
37.48	3.37326	2.38719	37.48	1.88461	2.25242
37.5	3.28103	2.45872	37.5	1.92828	2.42576
37.52	3.42274	2.52684	37.52	1.93783	2.15948
37.54	3.38355	2.53938	37.54	1.85285	2.1788
37.56	3.32015	2.24115	37.56	1.9662	2.41727
37.58	3.27308	2.27719	37.58	1.92011	2.33799
37.6	3.33186	2.18387	37.6	1.90836	2.35216
37.62	3.27169	2.04087	37.62	1.82751	2.35238
37.64	3.15942	2.20588	37.64	1.8678	2.0831
37.66	3.03942	2.13311	37.66	1.87984	2.33028
37.68	3.06836	2.21845	37.68	1.94175	2.40784
37.7	3.11917	2.70405	37.7	1.93438	2.18937
37.72	3.05074	2.54159	37.72	1.90063	2.34872
37.74	3.11134	2.46241	37.74	2.00485	2.30978
37.76	3.06006	2.691	37.76	1.85689	2.44839
37.78	3.1263	2.6525	37.78	1.9114	1.99
37.8	3.15489	2.41383	37.8	1.90142	2.10944
37.82	3.18551	2.46119	37.82	1.8438	2.16489
37.84	3.24421	2.30556	37.84	1.82976	2.07691
37.86	3.32261	2.14691	37.86	1.93114	2.40802
37.88	3.32575	2.02625	37.88	1.95732	2.33389
37.9	3.32959	2.28254	37.9	1.90282	2.2629
37.92	3.2358	2.18362	37.92	1.83239	2.33972
37.94	3.22667	2.46203	37.94	1.98689	2.20384
37.96	3.27674	2.32116	37.96	1.92191	1.87362
37.98	3.30829	2.13103	37.98	2.07157	2.36561
38	3.25469	2.44474	38	1.97072	2.42586
38.02	3.28615	2.24384	38.02	1.94361	2.21565
38.04	3.43054	2.52148	38.04	1.94889	2.18373
38.06	3.3874	2.59384	38.06	1.96898	2.45388
38.08	3.37679	2.4752	38.08	1.92063	2.3493
38.1	3.38351	2.49473	38.1	1.96789	2.44421
38.12	3.26387	2.22116	38.12	1.99452	2.19542
38.14	3.2429	2.19548	38.14	1.98177	2.25738
38.16	3.27206	2.24064	38.16	1.94563	2.13556
38.18	3.31943	2.33799	38.18	1.87938	2.21844
38.2	3.37073	2.38205	38.2	1.92569	2.41432
38.22	3.36412	2.25003	38.22	2.05173	2.37644
38.24	3.36408	2.43838	38.24	1.99547	2.35781
38.26	3.40819	2.01554	38.26	2.0467	2.40556
38.28	3.53507	2.13042	38.28	2.01585	2.30089
38.3	3.34042	2.02466	38.3	1.92063	2.22684
38.32	3.34837	2.25006	38.32	1.98826	2.26381
38.34	3.27919	2.23168	38.34	1.91898	2.41791
38.36	3.28641	2.34659	38.36	2.00382	2.26966
38.38	3.22755	2.5483	38.38	1.95817	2.51049
38.4	3.19825	2.54168	38.4	1.99053	2.25802
38.42	3.22034	2.58887	38.42	1.95592	2.25476
38.44	3.21235	2.54379	38.44	2.09094	2.32535
38.46	3.27766	2.58338	38.46	2.04571	2.21919
38.48	3.34606	2.65655	38.48	2.02448	2.53239
38.5	3.19888	2.5605	38.5	2.13445	2.44495
38.52	3.17325	2.53141	38.52	2.01469	2.23466
38.54	3.27588	2.51068	38.54	2.02837	2.44728
38.56	3.28038	2.44766	38.56	1.99667	2.45282
38.58	3.22155	2.50681	38.58	1.99145	2.28755
38.6	3.18827	2.46298	38.6	2.01849	2.30618
38.62	3.19381	2.37388	38.62	2.0557	2.64014
38.64	3.15101	2.55014	38.64	2.01541	2.53345
38.66	3.18236	2.42176	38.66	2.01932	2.48499
38.68	3.13748	2.53887	38.68	2.01002	2.52747
38.7	3.20226	2.48041	38.7	2.0249	2.51604
38.72	3.298	2.44723	38.72	2.02622	2.56149
38.74	3.26905	2.55548	38.74	2.00346	2.2579
38.76	3.16032	2.42753	38.76	2.00256	2.20248
38.78	3.10857	2.53317	38.78	1.96794	2.41584
38.8	3.17386	2.48989	38.8	1.98772	2.2159
38.82	3.27596	2.45605	38.82	2.00781	2.27968
38.84	3.24469	2.36762	38.84	2.03411	2.5374
38.86	3.20903	2.61001	38.86	2.02115	2.48713
38.88	3.1572	2.69097	38.88	1.99484	2.62409
38.9	3.09992	2.3847	38.9	2.04557	2.31057
38.92	3.1616	2.46912	38.92	2.16421	2.37014
38.94	3.05493	2.57627	38.94	2.01834	2.52789
38.96	3.06546	2.40559	38.96	1.95919	2.44583
38.98	3.06455	2.4669	38.98	2.03841	2.48471
39	3.09388	2.41391	39	2.05784	2.37673
39.02	3.10559	2.68133	39.02	2.0482	2.20026
39.04	3.13553	2.49521	39.04	2.03152	2.16085
39.06	3.08859	2.55029	39.06	1.93729	2.20637
39.08	3.11687	2.34625	39.08	1.92268	2.35076
39.1	3.19304	2.33781	39.1	2.00407	2.2685
39.12	3.19422	1.56454	39.12	1.99361	2.26893
39.14	3.25531	1.22312	39.14	1.96147	2.15292
39.16	3.25459	0.702263	39.16	1.97589	2.41972
39.18	3.26149	1.3822	39.18	2.0177	2.45748
39.2	3.2583	1.48456	39.2	1.93707	2.35414
39.22	3.25159	1.26777	39.22	2.00923	2.37521
39.24	3.19989	1.76878	39.24	1.95446	2.3512
39.26	3.23333	1.73139	39.26	1.96332	2.45015
39.28	3.17869	1.77436	39.28	2.01856	2.60434
39.3	3.22678	1.60362	39.3	1.88438	2.54326
39.32	3.1689	1.82523	39.32	1.99114	2.64799
39.34	3.2028	1.72795	39.34	1.94766	2.34595
39.36	3.16073	1.73884	39.36	1.83865	2.47647
39.38	3.21937	1.58812	39.38	1.9523	2.34031
39.4	3.1504	1.71145	39.4	1.94691	2.63997
39.42	3.05567	1.75867	39.42	1.8781	2.52271
39.44	2.99939	1.87345	39.44	1.93097	2.19453
39.46	3.08128	1.64251	39.46	1.93239	2.1543
39.48	3.11902	1.72774	39.48	1.99777	2.15579
39.5	3.01415	1.55844	39.5	2.07731	2.39732
39.52	3.0452	2.00124	39.52	2.03648	2.72106
39.54	3.07761	1.99536	39.54	2.07981	2.41612
39.56	3.0752	1.73219	39.56	1.88055	2.22
39.58	3.20463	1.86004	39.58	1.85582	2.53198
39.6	3.11139	1.85165	39.6	1.89589	2.51839
39.62	3.15004	1.8463	39.62	2.00097	2.42497
39.64	3.17692	1.74898	39.64	2.12545	2.43518
39.66	3.12005	1.43232	39.66	2.1778	1.87097
39.68	3.09868	1.46916	39.68	2.11098	2.21816
39.7	3.07151	1.63716	39.7	2.01138	2.35206
39.72	3.06932	1.49747	39.72	2.09913	2.23669
39.74	2.97831	1.66384	39.74	2.07104	2.39983
39.76	3.01541	1.79712	39.76	2.11981	2.35712
39.78	2.99674	1.77648	39.78	2.07296	2.21954
39.8	3.03971	1.07677	39.8	2.07097	2.20134
39.82	3.13389	0.894389	39.82	2.15219	2.02262
39.84	3.03228	1.02698	39.84	2.17794	2.18777
39.86	3.00072	0.816734	39.86	2.25086	2.14234
39.88	3.02847	1.07144	39.88	2.1381	2.09264
39.9	3.08355	1.04204	39.9	2.31414	2.06641
39.92	3.06882	0.827583	39.92	2.18976	2.10794
39.94	3.14151	1.40706	39.94	2.28877	2.12243
39.96	3.06212	1.35588	39.96	2.18802	2.30233
39.98	3.04979	1.03119	39.98	2.20714	2.28086
[truncated: 502 more rows]

## Sheet: Metformin
Time (ns)	Protein_ARG1	LIG_Metformin	Time (ns)	Protein_ARG2	LIG_Metformin
0.02	0.750556	0.572865	0.02	0.690923	0.952811
0.04	0.861862	1.0112	0.04	0.763856	1.02289
0.06	1.02152	0.810896	0.06	0.835572	1.0545
0.08	1.07033	0.827028	0.08	0.904904	1.01876
0.1	1.17196	0.71486	0.1	0.86001	0.991123
0.12	1.12047	0.933026	0.12	0.839222	1.03369
0.14	1.1519	0.761171	0.14	0.831953	1.13945
0.16	1.37478	1.12561	0.16	0.840939	1.01483
0.18	1.22512	1.24793	0.18	0.785706	1.37489
0.2	1.631	1.29829	0.2	0.826182	1.30216
0.22	1.56906	1.24521	0.22	0.7938	1.13602
0.24	1.5692	1.42339	0.24	0.914727	1.04815
0.26	1.53411	1.40658	0.26	0.891319	1.01853
0.28	1.69244	1.17988	0.28	0.776275	1.10671
0.3	1.75492	1.17076	0.3	0.933547	1.16655
0.32	1.88591	1.29878	0.32	0.8521	1.11539
0.34	1.86763	1.3454	0.34	0.829076	0.997574
0.36	1.79314	1.41919	0.36	0.829972	1.31667
0.38	1.82668	1.277	0.38	0.946391	0.842848
0.4	1.62572	1.25621	0.4	0.829521	0.874711
0.42	1.59842	1.19428	0.42	0.882021	0.817291
0.44	1.49294	1.20258	0.44	0.877934	0.666196
0.46	1.41598	1.49252	0.46	0.943891	0.978792
0.48	1.43022	1.3178	0.48	0.911909	0.842698
0.5	1.48735	1.27711	0.5	0.896177	0.750983
0.52	1.4697	1.36115	0.52	0.851009	0.855743
0.54	1.56056	1.48852	0.54	0.915237	0.925343
0.56	1.48468	1.30742	0.56	0.917399	1.13787
0.58	1.62469	1.24631	0.58	0.875541	1.205
0.6	1.43338	1.11659	0.6	0.886692	0.932086
0.62	1.52229	1.32498	0.62	0.85457	0.971113
0.64	1.59789	1.41825	0.64	0.948213	1.01624
0.66	1.65901	1.33092	0.66	0.852195	1.06747
0.68	1.52803	1.40098	0.68	0.871521	0.950592
0.7	1.71354	1.50492	0.7	0.811256	1.31739
0.72	1.63988	1.2404	0.72	0.865295	1.0331
0.74	1.65613	1.50024	0.74	0.926253	1.05713
0.76	1.85292	1.45954	0.76	0.827889	0.83241
0.78	1.74131	1.44859	0.78	0.86861	1.10364
0.8	1.62035	1.28062	0.8	0.905988	0.979141
0.82	1.6071	1.35291	0.82	0.875624	1.39508
0.84	1.61816	1.23135	0.84	0.960895	1.35235
0.86	1.51064	1.00195	0.86	0.974059	1.05554
0.88	1.55081	1.35217	0.88	0.894381	1.14397
0.9	1.60716	1.32017	0.9	0.940766	1.26522
0.92	1.52293	1.49148	0.92	0.992572	1.0149
0.94	1.5119	1.45887	0.94	0.882696	1.05598
0.96	1.46721	1.39	0.96	0.839965	1.28211
0.98	1.61577	1.45865	0.98	0.877579	0.92212
1	1.49802	1.30568	1	0.868643	0.936676
1.02	1.51784	1.4833	1.02	0.897267	1.06685
1.04	1.53776	1.42112	1.04	0.892215	1.1787
1.06	1.55355	1.17575	1.06	0.959901	0.949915
1.08	1.54827	1.15139	1.08	0.839879	1.09997
1.1	1.61374	1.49412	1.1	0.836958	0.957006
1.12	1.71541	1.37006	1.12	0.889057	0.852721
1.14	1.60032	1.35204	1.14	0.860191	1.29857
1.16	1.59009	1.34906	1.16	0.911075	1.07198
1.18	1.56967	1.25871	1.18	0.897834	0.807828
1.2	1.65308	1.26492	1.2	0.878886	1.11415
1.22	1.73915	1.51764	1.22	0.936506	1.09145
1.24	1.62906	1.26811	1.24	0.967357	0.76971
1.26	1.76498	1.18045	1.26	0.859576	0.789753
1.28	1.91752	1.10627	1.28	0.942668	0.64174
1.3	1.82286	1.51589	1.3	0.97396	0.999031
1.32	1.95472	1.32037	1.32	0.973376	1.09504
1.34	2.16522	1.48252	1.34	1.1325	0.903606
1.36	2.0841	1.38348	1.36	1.08746	0.865845
1.38	2.21501	1.26929	1.38	1.15949	0.901026
1.4	2.30372	1.30537	1.4	1.1219	0.906625
1.42	2.17159	1.18026	1.42	1.14622	0.702334
1.44	2.17142	1.48383	1.44	1.14551	0.896036
1.46	2.17571	1.22075	1.46	1.04611	0.890554
1.48	2.2623	1.27702	1.48	1.20835	0.784129
1.5	2.28507	1.37947	1.5	1.19765	1.01762
1.52	2.4261	1.39237	1.52	1.06646	0.538781
1.54	2.582	1.48063	1.54	1.1058	0.871296
1.56	2.5309	1.27999	1.56	1.21474	0.70883
1.58	2.72962	1.40823	1.58	1.15097	1.10666
1.6	2.74973	1.18637	1.6	1.17449	0.756548
1.62	2.70644	1.23148	1.62	1.26169	0.938586
1.64	2.69421	1.56916	1.64	1.25478	1.03714
1.66	2.60818	1.38891	1.66	1.11576	1.03516
1.68	2.4232	1.1552	1.68	1.17088	0.778034
1.7	2.34615	1.50356	1.7	1.2072	0.49525
1.72	2.42024	1.27836	1.72	1.1752	0.969415
1.74	2.4179	1.41991	1.74	1.11871	0.886021
1.76	2.40567	1.32714	1.76	1.05096	0.70623
1.78	2.5184	1.23253	1.78	1.14903	0.715268
1.8	2.25261	1.25563	1.8	1.14547	0.945222
1.82	2.42493	1.3926	1.82	1.0975	0.920921
1.84	2.52443	1.43487	1.84	1.18777	0.952191
1.86	2.62934	1.33494	1.86	1.22244	0.948648
1.88	2.52661	1.46086	1.88	1.14226	0.627069
1.9	2.39621	1.48549	1.9	1.1005	0.741346
1.92	2.30089	1.29048	1.92	1.15933	0.649503
1.94	2.29685	1.26728	1.94	1.28455	0.809843
1.96	2.24914	1.37074	1.96	1.21645	1.03839
1.98	2.07106	1.39806	1.98	1.17091	0.708726
2	1.99075	1.43457	2	1.20794	0.954868
2.02	2.03798	1.19222	2.02	1.23412	0.725413
2.04	2.00156	1.35897	2.04	1.14143	0.762983
2.06	1.84912	1.43703	2.06	1.16753	0.773073
2.08	1.7572	1.20487	2.08	1.14278	0.713313
2.1	1.70816	1.1438	2.1	1.12649	0.597737
2.12	1.84553	1.34934	2.12	1.18487	0.995084
2.14	1.90817	1.5767	2.14	1.1139	0.94933
2.16	1.92682	1.37522	2.16	1.06657	0.799106
2.18	1.87146	1.41733	2.18	1.18577	0.955242
2.2	1.82438	1.49524	2.2	1.14717	1.1463
2.22	1.7583	1.25842	2.22	1.10977	0.91553
2.24	2.01805	1.39244	2.24	1.14583	1.01141
2.26	1.94706	1.26865	2.26	1.14998	0.70447
2.28	1.97681	1.18108	2.28	1.17083	0.62789
2.3	2.04585	1.41316	2.3	1.25132	0.321437
2.32	2.13195	1.34045	2.32	1.15757	1.13802
2.34	2.03234	1.38424	2.34	1.11241	0.897402
2.36	2.08628	1.41529	2.36	1.06015	0.929791
2.38	2.23465	1.29631	2.38	1.06689	0.764207
2.4	2.15145	1.41744	2.4	1.04688	0.925979
2.42	2.10258	1.4771	2.42	1.1234	1.04392
2.44	2.22851	1.60645	2.44	1.04748	0.946726
2.46	2.11945	1.46688	2.46	1.00742	0.987617
2.48	2.11818	1.40299	2.48	1.07055	0.714427
2.5	2.15708	1.50858	2.5	1.06667	0.810208
2.52	2.25605	1.49533	2.52	1.17109	0.660155
2.54	2.27353	1.53947	2.54	1.11034	1.19378
2.56	2.11176	1.49334	2.56	1.16858	0.80009
2.58	2.33975	1.50824	2.58	1.18437	0.922477
2.6	2.30634	1.20299	2.6	1.15242	0.86169
2.62	2.22246	1.60248	2.62	1.16302	0.8209
2.64	2.17288	1.37195	2.64	1.14395	0.684352
2.66	2.21968	1.12841	2.66	1.20399	0.805503
2.68	2.21055	1.53908	2.68	1.08464	0.664395
2.7	2.21382	1.4446	2.7	1.24071	1.14146
2.72	2.32826	1.29683	2.72	1.08425	0.451815
2.74	2.33538	1.4453	2.74	1.0672	1.08026
2.76	2.39137	1.42933	2.76	1.12013	1.04841
2.78	2.28717	1.36547	2.78	1.13145	0.893651
2.8	2.22411	1.54394	2.8	1.17142	1.03254
2.82	2.27188	1.26203	2.82	1.1866	0.802759
2.84	2.31326	1.33335	2.84	1.15762	0.791117
2.86	2.34843	1.33235	2.86	1.17171	1.14041
2.88	2.17693	1.41759	2.88	1.13278	0.919283
2.9	2.18574	1.23342	2.9	1.2095	1.16927
2.92	2.16116	1.45192	2.92	1.17435	0.509831
2.94	2.21849	1.49385	2.94	1.12328	0.589988
2.96	2.14694	1.34622	2.96	1.16772	0.887132
2.98	2.24352	1.05136	2.98	1.22736	0.751448
3	2.13681	1.18585	3	1.15881	0.525363
3.02	2.09307	1.27951	3.02	1.18204	0.727926
3.04	2.35023	1.48938	3.04	1.31907	0.574181
3.06	2.52928	1.28612	3.06	1.16555	0.84951
3.08	2.2791	1.28531	3.08	1.18861	1.08303
3.1	2.36197	1.38304	3.1	1.15539	0.720869
3.12	2.33936	1.39728	3.12	1.13571	0.91624
3.14	2.27066	1.48962	3.14	1.24392	1.12775
3.16	2.17178	1.42689	3.16	1.16456	0.748678
3.18	2.32635	1.38407	3.18	1.26717	0.886749
3.2	2.2797	1.46946	3.2	1.20782	0.599652
3.22	2.33006	1.0833	3.22	1.23633	0.714581
3.24	2.21503	1.22691	3.24	1.25814	0.978526
3.26	2.11599	1.19348	3.26	1.23652	1.04453
3.28	2.27437	1.44687	3.28	1.28781	1.07544
3.3	2.30275	1.28992	3.3	1.22706	1.04359
3.32	2.30993	1.12125	3.32	1.31374	0.834101
3.34	2.13267	1.37105	3.34	1.24996	1.00478
3.36	2.11191	1.1161	3.36	1.20387	0.792441
3.38	2.03483	1.08007	3.38	1.25388	1.13869
3.4	1.94548	1.42724	3.4	1.26395	0.938978
3.42	2.05414	1.04788	3.42	1.32256	0.912474
3.44	2.13048	1.39985	3.44	1.33522	0.880005
3.46	1.98535	0.971222	3.46	1.35666	1.0694
3.48	2.02734	0.955817	3.48	1.4419	0.747516
3.5	2.12667	1.17584	3.5	1.26598	0.864829
3.52	1.99348	1.31545	3.52	1.16473	0.763885
3.54	2.02063	1.39714	3.54	1.32443	1.1431
3.56	2.12905	1.09081	3.56	1.37765	1.00931
3.58	2.05124	1.26271	3.58	1.299	0.563238
3.6	2.10728	1.25235	3.6	1.23412	0.904414
3.62	2.06389	1.18519	3.62	1.25698	0.820118
3.64	1.90256	1.29197	3.64	1.1908	0.970273
3.66	1.99107	1.27824	3.66	1.22286	0.963597
3.68	2.04526	1.03579	3.68	1.23268	0.937658
3.7	2.10319	1.12381	3.7	1.22359	0.523298
3.72	2.10217	1.45269	3.72	1.38967	1.18632
3.74	2.14837	1.04419	3.74	1.2911	1.06413
3.76	1.97637	1.35209	3.76	1.27547	0.852547
3.78	2.0834	1.34076	3.78	1.3798	1.17151
3.8	2.01356	1.21483	3.8	1.3593	0.598265
3.82	2.13072	1.35682	3.82	1.36363	0.653092
3.84	2.17155	1.30265	3.84	1.46006	1.19311
3.86	2.199	1.07275	3.86	1.43481	0.895472
3.88	2.25592	1.27026	3.88	1.51752	1.04741
3.9	2.06465	1.16721	3.9	1.45157	1.19092
3.92	2.23343	1.23766	3.92	1.37963	1.21155
3.94	2.29121	1.42558	3.94	1.38445	0.813059
3.96	2.36379	1.23417	3.96	1.2262	1.11339
3.98	2.46766	1.40167	3.98	1.37324	1.06129
4	2.37927	1.41387	4	1.44311	0.699791
4.02	2.39744	1.13844	4.02	1.29566	0.617065
4.04	2.21059	1.13188	4.04	1.15958	0.751912
4.06	2.18357	1.34139	4.06	1.33464	0.878827
4.08	2.04785	1.43656	4.08	1.31056	0.907113
4.1	2.16934	1.148	4.1	1.24315	0.800106
4.12	2.18837	1.2118	4.12	1.28489	0.871754
4.14	2.21595	1.12171	4.14	1.20512	1.15015
4.16	2.16392	1.28141	4.16	1.2964	1.03925
4.18	2.32436	1.22121	4.18	1.22318	1.02707
4.2	2.42454	1.54292	4.2	1.31867	0.916708
4.22	2.16016	1.31435	4.22	1.23572	0.833383
4.24	2.10388	1.30758	4.24	1.38663	0.945422
4.26	2.11065	1.2092	4.26	1.31434	0.599838
4.28	2.1449	1.32271	4.28	1.38647	1.16416
4.3	2.07428	1.35756	4.3	1.32349	0.946589
4.32	2.1244	1.44708	4.32	1.38515	0.975684
4.34	2.18105	1.31478	4.34	1.42293	0.70704
4.36	2.21483	1.33254	4.36	1.48582	0.802871
4.38	2.29136	1.13713	4.38	1.39819	0.919141
4.4	2.12203	1.32162	4.4	1.51745	1.01174
4.42	2.05437	1.29137	4.42	1.37053	0.888405
4.44	1.99052	1.54187	4.44	1.34779	1.0529
4.46	2.09421	1.29321	4.46	1.49547	1.16505
4.48	2.07293	1.46548	4.48	1.2513	0.904549
4.5	2.08625	1.36876	4.5	1.33656	0.822347
4.52	2.06672	1.43721	4.52	1.34228	0.934298
4.54	2.09153	1.3058	4.54	1.48335	0.701424
4.56	2.16772	1.00463	4.56	1.40524	0.927255
4.58	2.18582	1.26776	4.58	1.40989	1.02485
4.6	2.21938	1.50737	4.6	1.38424	1.18074
4.62	2.25498	1.31457	4.62	1.39107	1.2062
4.64	2.34676	1.56457	4.64	1.4272	0.880122
4.66	2.35739	1.39348	4.66	1.33635	0.768205
4.68	2.39644	1.30557	4.68	1.39347	0.646319
4.7	2.2717	1.27886	4.7	1.48229	0.743773
4.72	2.31618	1.30316	4.72	1.42885	0.645721
4.74	2.36233	1.3718	4.74	1.30131	1.03601
4.76	2.40618	1.19563	4.76	1.27175	0.809222
4.78	2.24642	1.1175	4.78	1.33232	0.741687
4.8	2.39048	1.47104	4.8	1.39742	1.18814
4.82	2.38629	1.06493	4.82	1.41699	0.713473
4.84	2.53761	1.36737	4.84	1.36526	0.838747
4.86	2.49742	1.4781	4.86	1.51411	1.33115
4.88	2.4925	1.16363	4.88	1.5128	0.890611
4.9	2.61044	1.37221	4.9	1.43517	1.08564
4.92	2.6333	1.27976	4.92	1.28247	0.966474
4.94	2.73297	1.46712	4.94	1.48838	1.22958
4.96	2.76387	1.39323	4.96	1.4114	0.905266
4.98	2.63574	1.39947	4.98	1.46091	0.807072
5	2.65792	1.28083	5	1.50185	0.994757
5.02	2.75573	1.38761	5.02	1.49638	0.685651
5.04	2.93713	1.23455	5.04	1.65179	0.626943
5.06	2.90556	1.42374	5.06	1.52515	0.910832
5.08	2.93494	1.36698	5.08	1.44808	0.966675
5.1	2.96427	1.45108	5.1	1.44319	1.07083
5.12	2.99973	1.44399	5.12	1.41702	0.836584
5.14	3.05838	1.347	5.14	1.32701	1.08485
5.16	2.87175	1.33105	5.16	1.42811	1.16987
5.18	2.94623	1.17977	5.18	1.46924	0.58365
5.2	2.89357	0.979095	5.2	1.36128	0.893134
5.22	3.03171	1.34157	5.22	1.26498	0.842419
5.24	3.04386	1.41056	5.24	1.2435	0.876563
5.26	3.22536	1.20771	5.26	1.42915	0.921105
5.28	3.25781	1.40158	5.28	1.48744	0.557062
5.3	3.23212	1.22887	5.3	1.33374	0.803589
5.32	3.5128	1.06451	5.32	1.34527	0.698685
5.34	3.47543	1.30138	5.34	1.31046	1.01923
5.36	3.53594	1.48088	5.36	1.36793	0.966782
5.38	3.26756	1.38651	5.38	1.33498	0.607266
5.4	3.44483	1.32862	5.4	1.27943	0.780741
5.42	3.40501	1.36277	5.42	1.38449	0.997443
5.44	3.42365	1.32867	5.44	1.31988	1.028
5.46	3.57456	1.43513	5.46	1.40098	0.905618
5.48	3.76791	1.50765	5.48	1.30826	0.898
5.5	3.61453	1.4991	5.5	1.31552	0.988852
5.52	3.69267	1.3419	5.52	1.33402	1.07805
5.54	3.67266	1.11978	5.54	1.32816	0.940965
5.56	3.64843	1.28076	5.56	1.45923	1.09787
5.58	3.80837	1.42879	5.58	1.36762	0.795827
5.6	3.81495	1.26744	5.6	1.35445	1.1745
5.62	3.58109	1.32153	5.62	1.38071	1.02438
5.64	3.60846	1.29924	5.64	1.29911	0.77562
5.66	3.73915	1.35468	5.66	1.3122	1.00559
5.68	3.76775	1.30731	5.68	1.47588	1.06235
5.7	3.61447	1.1888	5.7	1.33586	1.25602
5.72	3.65052	1.31915	5.72	1.48596	0.889066
5.74	3.59521	1.29315	5.74	1.48958	0.79561
5.76	3.70082	1.20627	5.76	1.39885	0.769718
5.78	3.952	1.48446	5.78	1.28134	0.772879
5.8	3.78152	0.995862	5.8	1.26596	1.18505
5.82	3.85283	1.44442	5.82	1.33155	0.681357
5.84	3.92946	1.34292	5.84	1.25	0.723889
5.86	3.59148	1.24928	5.86	1.33404	0.815045
5.88	3.3662	1.26744	5.88	1.26478	0.920237
5.9	3.3091	1.27775	5.9	1.33095	0.796434
5.92	3.29644	1.49554	5.92	1.39066	1.12602
5.94	3.30885	1.31187	5.94	1.40752	1.05182
5.96	3.40297	1.28622	5.96	1.42922	1.06817
5.98	3.29163	1.41813	5.98	1.33275	1.22774
6	3.08429	1.45072	6	1.3333	0.879843
6.02	2.90338	1.31152	6.02	1.4087	1.09981
6.04	3.09974	1.21604	6.04	1.39482	1.01234
6.06	3.05566	1.54323	6.06	1.28237	1.03654
6.08	3.02747	1.3384	6.08	1.14854	0.926903
6.1	3.25965	1.31859	6.1	1.23413	1.00164
6.12	3.3055	1.45659	6.12	1.25383	0.872006
6.14	3.3347	1.47594	6.14	1.26926	0.991995
6.16	3.24161	1.54139	6.16	1.22725	1.04646
6.18	3.12615	1.24978	6.18	1.32597	0.865542
6.2	3.35192	1.27945	6.2	1.31518	1.02619
6.22	3.39694	1.32385	6.22	1.21562	0.973752
6.24	3.36294	1.4272	6.24	1.19158	0.884033
6.26	3.31996	1.24864	6.26	1.21155	1.01984
6.28	3.3164	1.36849	6.28	1.34086	0.800269
6.3	3.3604	1.39973	6.3	1.3006	1.00765
6.32	3.57786	1.51736	6.32	1.25667	1.04523
6.34	3.49504	1.47626	6.34	1.42198	0.907558
6.36	3.44347	1.19508	6.36	1.39422	1.01408
6.38	3.4071	1.39709	6.38	1.36978	1.12156
6.4	3.2759	1.38246	6.4	1.25397	1.07222
6.42	3.2764	1.29848	6.42	1.43039	1.11039
6.44	3.4773	1.35721	6.44	1.52148	0.567439
6.46	3.43177	1.39987	6.46	1.40559	1.2177
6.48	3.44134	1.41239	6.48	1.43913	1.04256
6.5	3.4121	1.37765	6.5	1.37038	1.08895
6.52	3.49782	1.27073	6.52	1.27735	0.854713
6.54	3.40582	1.45648	6.54	1.40325	1.16257
6.56	3.25189	1.40019	6.56	1.42418	1.15191
6.58	3.35094	1.29449	6.58	1.41588	1.03166
6.6	3.48608	1.3794	6.6	1.3211	0.719263
6.62	3.52311	1.44403	6.62	1.34295	1.12782
6.64	3.57711	1.46344	6.64	1.47345	0.755312
6.66	3.64646	1.01665	6.66	1.50733	1.23901
6.68	3.29545	1.23802	6.68	1.37278	0.974937
6.7	3.35534	1.23968	6.7	1.45588	0.80225
6.72	3.54793	1.22654	6.72	1.46893	0.578646
6.74	3.71088	1.12294	6.74	1.63297	0.811692
6.76	3.80349	1.34802	6.76	1.54011	1.00136
6.78	3.80342	1.21687	6.78	1.40741	1.0349
6.8	3.78683	1.40431	6.8	1.43787	1.00788
6.82	3.82205	1.5546	6.82	1.52565	1.15453
6.84	3.7998	1.23595	6.84	1.50623	0.742523
6.86	3.60127	1.35724	6.86	1.49019	1.11493
6.88	3.4974	1.38176	6.88	1.54463	0.427163
6.9	3.50616	1.48767	6.9	1.57094	0.997602
6.92	3.73838	1.20625	6.92	1.52371	1.26334
6.94	3.92474	1.2694	6.94	1.42242	0.953151
6.96	3.75166	1.20544	6.96	1.42002	1.16265
6.98	3.93209	1.41584	6.98	1.57074	1.06999
7	3.87101	1.51237	7	1.47282	0.470148
7.02	3.68561	1.38513	7.02	1.49624	0.956804
7.04	3.92476	1.38435	7.04	1.38927	1.04262
7.06	4.13392	1.34321	7.06	1.35489	0.756781
7.08	4.08023	1.32981	7.08	1.41562	1.0174
7.1	4.0781	1.16358	7.1	1.50328	0.911958
7.12	4.0183	1.56171	7.12	1.51263	0.992188
7.14	3.91839	1.32324	7.14	1.53077	1.10936
7.16	3.9586	1.58748	7.16	1.51924	0.672649
7.18	3.81338	1.31713	7.18	1.40716	1.1437
7.2	3.89966	1.37642	7.2	1.46864	0.793884
7.22	3.70322	1.19479	7.22	1.44844	0.9827
7.24	3.60057	1.38986	7.24	1.44258	0.775733
7.26	3.69024	1.1513	7.26	1.53388	0.942499
7.28	3.66855	1.47221	7.28	1.46224	1.03628
7.3	3.59695	1.32613	7.3	1.54158	1.0182
7.32	3.42588	1.33464	7.32	1.51441	0.834445
7.34	3.35083	1.24815	7.34	1.55336	0.991884
7.36	3.34078	1.1835	7.36	1.53665	0.8448
7.38	3.71889	1.26017	7.38	1.57557	0.772644
7.4	3.97665	1.45037	7.4	1.549	0.814416
7.42	3.7693	1.4627	7.42	1.5065	1.05875
7.44	3.59227	1.49516	7.44	1.56804	1.04547
7.46	3.56565	1.3165	7.46	1.60042	0.952156
7.48	3.41332	1.39537	7.48	1.60582	0.912837
7.5	3.54032	1.25422	7.5	1.62833	1.08572
7.52	3.89581	1.28475	7.52	1.61695	1.15329
7.54	3.96825	1.11833	7.54	1.57269	1.15694
7.56	3.56293	1.27384	7.56	1.62636	0.782294
7.58	3.91849	1.39273	7.58	1.76127	0.766457
7.6	4.06145	1.49728	7.6	1.72418	0.884187
7.62	3.95618	1.53571	7.62	1.58769	0.947905
7.64	4.10276	1.19419	7.64	1.68592	1.10284
7.66	4.06514	1.26619	7.66	1.64337	1.03625
7.68	4.21494	1.6703	7.68	1.61939	0.739095
7.7	4.20898	1.26654	7.7	1.74158	1.21823
7.72	4.2655	1.25689	7.72	1.65856	1.06822
7.74	4.06781	1.4127	7.74	1.64575	1.53661
7.76	3.9384	1.48108	7.76	1.58713	1.13003
7.78	3.97779	1.26167	7.78	1.61118	1.44301
7.8	3.8092	1.38003	7.8	1.64405	1.30261
7.82	3.93814	1.24945	7.82	1.64304	1.2345
7.84	3.93942	1.38641	7.84	1.66043	0.935221
7.86	3.72917	1.57191	7.86	1.68674	1.10324
7.88	3.80408	1.2326	7.88	1.57892	1.31076
7.9	3.99202	1.46187	7.9	1.58219	0.902144
7.92	3.94313	1.40249	7.92	1.58536	1.06899
7.94	3.9064	1.33749	7.94	1.52192	0.872676
7.96	4.00809	1.39696	7.96	1.52876	1.1355
7.98	3.80366	1.47833	7.98	1.54862	1.10983
8	4.10771	1.39515	8	1.46821	0.97223
8.02	3.99313	1.26047	8.02	1.54174	0.994163
8.04	3.98375	1.44766	8.04	1.64948	1.04226
8.06	3.70353	0.883829	8.06	1.74748	1.08713
8.08	3.6821	1.3676	8.08	1.8245	1.34894
8.1	3.50271	1.14423	8.1	1.6123	1.31672
8.12	3.40715	1.32789	8.12	1.69955	1.27317
8.14	3.57453	1.5025	8.14	1.62562	1.20611
8.16	3.64765	1.41124	8.16	1.6064	1.13716
8.18	3.28904	1.41343	8.18	1.57024	1.20786
8.2	3.35662	1.37571	8.2	1.61797	1.10328
8.22	3.38695	1.51585	8.22	1.6574	1.21526
8.24	3.413	1.27309	8.24	1.66704	0.851012
8.26	3.48238	1.44428	8.26	1.70956	1.14225
8.28	3.46711	1.36848	8.28	1.67175	0.796623
8.3	3.3186	1.41595	8.3	1.74866	1.19223
8.32	3.39603	1.4334	8.32	1.61251	0.759027
8.34	3.13991	1.55439	8.34	1.60168	1.0612
8.36	3.32797	1.26841	8.36	1.65512	1.27075
8.38	3.32135	1.46019	8.38	1.71143	1.08241
8.4	3.28488	1.41918	8.4	1.68488	1.03977
8.42	3.20852	1.45326	8.42	1.61175	1.20748
8.44	3.15439	1.4258	8.44	1.61327	1.31436
8.46	3.16839	1.28091	8.46	1.55096	1.18921
8.48	3.26395	1.36088	8.48	1.64648	1.1838
8.5	3.39202	1.43437	8.5	1.569	0.951924
8.52	3.46649	1.49648	8.52	1.66742	1.12759
8.54	3.30072	1.33086	8.54	1.62038	1.09826
8.56	3.45329	1.41712	8.56	1.74792	1.3418
8.58	3.37936	1.39731	8.58	1.64646	1.24306
8.6	3.20256	1.18842	8.6	1.63366	1.23581
8.62	3.26412	1.37277	8.62	1.64597	1.31814
8.64	3.18132	1.48093	8.64	1.63403	1.07096
8.66	3.18451	1.38296	8.66	1.6692	1.0671
8.68	3.23181	1.32465	8.68	1.69105	1.29607
8.7	3.28282	1.3695	8.7	1.90054	1.28239
8.72	3.24938	1.3662	8.72	1.75163	1.29555
8.74	3.09894	1.2973	8.74	1.73079	1.27749
8.76	3.13125	1.4013	8.76	1.69851	1.2501
8.78	3.30042	1.43369	8.78	1.6896	0.862747
8.8	3.21758	1.49092	8.8	1.74877	0.726128
8.82	3.18865	1.33471	8.82	1.70004	1.05764
8.84	3.22242	1.29702	8.84	1.65415	1.19614
8.86	3.30343	1.58148	8.86	1.73021	1.33642
8.88	3.18314	1.3995	8.88	1.74009	1.25573
8.9	3.23296	1.09084	8.9	1.67192	1.28042
8.92	3.20372	1.47123	8.92	1.64221	1.26671
8.94	3.10277	1.23699	8.94	1.61937	1.39043
8.96	3.14284	1.44313	8.96	1.54565	0.924546
8.98	3.11106	1.35625	8.98	1.59463	0.947276
9	3.23541	1.45208	9	1.45843	0.950389
9.02	3.15812	1.31259	9.02	1.51275	0.928739
9.04	3.27711	1.38443	9.04	1.62097	1.01074
9.06	3.21404	1.34596	9.06	1.65274	1.17903
9.08	3.15104	1.35864	9.08	1.77483	1.13269
9.1	3.23862	1.31292	9.1	1.52953	1.33831
9.12	3.55056	1.22754	9.12	1.51147	1.12932
9.14	3.79268	1.50899	9.14	1.47206	0.990883
9.16	3.72292	1.24593	9.16	1.49038	0.959444
9.18	3.97945	1.21277	9.18	1.41334	0.755777
9.2	4.09362	1.24696	9.2	1.56274	1.11851
9.22	3.99401	1.25275	9.22	1.67974	1.24019
9.24	3.9309	1.31655	9.24	1.63351	1.29526
9.26	3.91914	1.17064	9.26	1.5536	1.2077
9.28	3.90054	1.3739	9.28	1.58833	1.2181
9.3	3.76386	1.26767	9.3	1.61103	1.0582
9.32	3.81809	1.43465	9.32	1.64953	1.07341
9.34	3.77209	1.33393	9.34	1.54626	1.11002
9.36	3.82708	1.04178	9.36	1.5897	1.22347
9.38	3.61506	1.35489	9.38	1.54495	0.980614
9.4	3.74226	1.24465	9.4	1.65757	1.03655
9.42	3.63762	1.44783	9.42	1.71081	0.562601
9.44	3.89224	1.13906	9.44	1.66308	1.26576
9.46	3.67752	1.45748	9.46	1.76839	1.32055
9.48	3.69178	1.3986	9.48	1.7973	1.04016
9.5	3.55503	1.29647	9.5	1.69358	1.22427
9.52	3.47677	1.3425	9.52	1.66843	1.22182
9.54	3.46534	1.46554	9.54	1.60348	0.944739
9.56	3.56506	1.19983	9.56	1.66439	1.03462
9.58	3.58117	1.30719	9.58	1.612	1.17659
9.6	3.44628	1.25749	9.6	1.63454	1.17198
9.62	3.2219	1.17319	9.62	1.62997	1.19739
9.64	3.11766	1.23862	9.64	1.60763	1.06613
9.66	3.04402	1.18505	9.66	1.74311	1.35987
9.68	3.20825	1.4203	9.68	1.71191	1.33686
9.7	2.94084	1.29086	9.7	1.64383	1.12222
9.72	3.03683	1.36558	9.72	1.67818	1.22235
9.74	3.13085	1.449	9.74	1.7951	1.34506
9.76	3.19377	1.5036	9.76	1.76229	1.36691
9.78	3.15675	1.13514	9.78	1.89411	1.09042
9.8	3.23548	1.36832	9.8	1.85787	1.26969
9.82	3.45143	1.34686	9.82	1.7284	1.26961
9.84	3.47401	1.40613	9.84	1.67048	1.20744
9.86	3.32633	1.42319	9.86	1.78409	1.13396
9.88	3.41356	1.21064	9.88	1.85127	1.09141
9.9	3.68026	1.2816	9.9	1.67657	0.931464
9.92	3.42414	1.31318	9.92	1.71894	1.28716
9.94	3.40777	1.40335	9.94	1.8076	1.33806
9.96	3.37571	1.39048	9.96	1.8659	1.22869
9.98	3.30099	1.2241	9.98	1.66179	1.37682
10	3.46796	1.32528	10	1.59172	1.07729
10.02	3.59851	1.3319	10.02	1.67504	1.38063
10.04	3.59039	1.24933	10.04	1.82594	0.843603
10.06	3.72291	1.41125	10.06	1.79777	1.24359
10.08	3.92141	1.33409	10.08	1.69855	1.18152
10.1	3.92914	1.48601	10.1	1.76228	0.904112
10.12	3.57329	1.32989	10.12	1.94134	1.15575
10.14	3.53284	1.50041	10.14	1.75889	1.00957
10.16	3.64864	1.37058	10.16	1.67883	0.861668
10.18	3.67986	1.41784	10.18	1.90004	1.18235
10.2	3.85607	1.39182	10.2	1.98512	1.1902
10.22	3.71246	1.31302	10.22	1.97504	1.465
10.24	3.67632	1.47668	10.24	1.89652	1.11766
10.26	3.63302	1.46039	10.26	2.11425	1.1858
10.28	3.38752	1.44636	10.28	2.00127	1.14028
10.3	3.49256	1.39759	10.3	1.9915	1.09285
10.32	3.35137	1.50656	10.32	1.83929	1.33837
10.34	3.61015	1.51985	10.34	1.91827	1.36458
10.36	3.61194	1.3526	10.36	1.85479	1.01627
10.38	3.54022	1.34942	10.38	1.81641	1.33934
10.4	3.57222	1.37553	10.4	1.91059	1.23046
10.42	3.56127	1.08479	10.42	1.81329	0.850852
10.44	3.44502	1.33124	10.44	1.74286	1.12356
10.46	3.3339	1.44726	10.46	1.85202	1.26318
10.48	3.43424	1.42401	10.48	1.72163	1.02211
10.5	3.59166	1.51831	10.5	1.65707	1.13408
10.52	3.59719	1.45812	10.52	1.79583	1.16773
10.54	3.87045	1.38179	10.54	1.57333	1.12007
10.56	3.69371	1.52225	10.56	1.70912	1.27215
10.58	3.74083	1.40833	10.58	1.69852	1.0343
10.6	3.77271	1.35864	10.6	1.74889	1.35355
10.62	3.81901	1.51963	10.62	1.75657	0.9398
10.64	3.97504	1.60277	10.64	1.64715	1.14498
10.66	3.84488	1.31392	10.66	1.68711	1.22131
10.68	3.84913	1.32363	10.68	1.62021	1.21079
10.7	3.95402	1.23891	10.7	1.59783	0.925697
10.72	4.01424	1.23114	10.72	1.60592	0.808113
10.74	4.00341	1.34889	10.74	1.6182	0.907502
10.76	4.0773	1.45537	10.76	1.60389	1.19104
10.78	3.82687	1.49644	10.78	1.73721	1.29304
10.8	3.9812	1.3802	10.8	1.70955	1.26309
10.82	3.96787	1.43715	10.82	1.75801	1.32097
10.84	3.86801	1.18601	10.84	1.77578	1.18767
10.86	3.77472	1.42277	10.86	1.70825	1.22854
10.88	3.68479	1.17715	10.88	1.69275	1.37859
10.9	3.66198	1.49558	10.9	1.63328	1.29231
10.92	3.56789	1.3437	10.92	1.59275	1.18961
10.94	3.4839	1.15965	10.94	1.67395	1.43609
10.96	3.55463	1.27053	10.96	1.67415	1.33338
10.98	3.60851	1.38786	10.98	1.61602	0.980714
11	3.31569	1.35635	11	1.70917	1.25612
11.02	3.31375	1.52414	11.02	1.70285	1.39301
11.04	3.48153	1.14778	11.04	1.74391	1.36168
11.06	3.33514	1.38524	11.06	1.77277	1.05468
11.08	3.46042	1.27223	11.08	1.64835	1.04603
11.1	3.45684	1.31288	11.1	1.81611	1.294
11.12	3.72089	1.35771	11.12	1.87845	1.12685
11.14	3.62612	1.3794	11.14	1.80105	1.23286
11.16	3.86011	1.40276	11.16	1.80905	1.33912
11.18	3.80359	1.43814	11.18	1.66039	1.09015
11.2	3.76843	1.52496	11.2	1.68526	1.34113
11.22	4.09679	1.412	11.22	1.63346	1.34738
11.24	4.11761	1.24011	11.24	1.80569	1.2676
11.26	4.00143	1.24285	11.26	1.81699	1.48081
11.28	3.83024	1.44778	11.28	1.79212	1.31594
11.3	3.75858	1.35762	11.3	1.75104	1.3004
11.32	3.61698	1.14806	11.32	1.68738	1.46665
11.34	3.50978	1.06084	11.34	1.60866	1.40753
11.36	3.66756	1.4096	11.36	1.52871	1.14188
11.38	3.45895	1.46774	11.38	1.54098	1.13852
11.4	3.26449	1.38548	11.4	1.62984	1.2001
11.42	3.1886	1.51806	11.42	1.52451	1.1499
11.44	2.93581	1.32032	11.44	1.6007	1.3295
11.46	3.0906	1.30143	11.46	1.6429	1.28575
11.48	3.11153	1.48373	11.48	1.63033	1.14462
11.5	3.27406	1.15149	11.5	1.59676	1.3178
11.52	3.22829	1.34387	11.52	1.57238	1.09931
11.54	3.13094	1.48294	11.54	1.751	1.29677
11.56	3.03892	1.65882	11.56	1.51115	1.36775
11.58	3.10045	1.46986	11.58	1.56499	1.20708
11.6	3.19788	1.32701	11.6	1.60223	1.45172
11.62	3.22575	1.17118	11.62	1.55483	1.15045
11.64	3.24928	1.35931	11.64	1.62842	1.36747
11.66	3.17596	1.28874	11.66	1.55856	1.13123
11.68	3.18014	1.52293	11.68	1.54934	1.30555
11.7	3.10625	1.42137	11.7	1.70808	1.21782
11.72	2.97614	1.54871	11.72	1.59473	0.994553
11.74	3.17684	1.27469	11.74	1.57416	1.23565
11.76	3.25516	1.46292	11.76	1.608	1.01789
11.78	3.26735	1.37156	11.78	1.60722	1.46366
11.8	3.23828	1.26209	11.8	1.51114	1.50251
11.82	3.20079	1.3904	11.82	1.61811	1.47892
11.84	3.05742	1.48879	11.84	1.5882	1.07646
11.86	3.04254	1.04015	11.86	1.56245	1.28259
11.88	3.10126	1.26265	11.88	1.57583	1.37951
11.9	3.05404	1.14001	11.9	1.61424	1.3075
11.92	3.2275	1.43092	11.92	1.48307	1.04861
11.94	3.16857	1.31898	11.94	1.51787	1.1655
11.96	3.32225	1.55093	11.96	1.57392	1.56186
11.98	3.38882	1.48853	11.98	1.50783	1.20674
12	3.35	1.42962	12	1.66601	1.37668
12.02	3.37709	1.01222	12.02	1.66921	1.1903
12.04	3.39109	1.32962	12.04	1.4999	1.38237
12.06	3.46114	1.2871	12.06	1.50342	1.33111
12.08	3.46663	1.22116	12.08	1.4876	1.21356
12.1	3.40724	1.28803	12.1	1.50041	1.31098
12.12	3.47487	1.52118	12.12	1.61681	1.26199
12.14	3.50118	1.31747	12.14	1.59913	1.24989
12.16	3.46596	1.4594	12.16	1.54419	1.08783
12.18	3.61965	1.42536	12.18	1.67674	1.0741
12.2	3.54953	1.51602	12.2	1.64382	1.29845
12.22	3.72586	1.2967	12.22	1.6655	1.06302
12.24	3.533	1.31636	12.24	1.64004	1.28114
12.26	3.81503	1.28605	12.26	1.61474	1.21648
12.28	3.75194	1.43426	12.28	1.68114	1.22997
12.3	3.64072	1.29123	12.3	1.53196	1.08677
12.32	3.9701	1.33706	12.32	1.62679	1.15695
12.34	4.02778	1.55443	12.34	1.58783	1.4056
12.36	4.19334	1.23866	12.36	1.53622	1.33777
12.38	4.06808	1.49548	12.38	1.556	1.42728
12.4	4.12364	1.14728	12.4	1.53045	1.25478
12.42	3.95503	1.26964	12.42	1.56391	1.08251
12.44	3.99801	1.42821	12.44	1.50824	1.14556
12.46	3.78611	1.37195	12.46	1.5939	1.25213
12.48	3.79693	1.34659	12.48	1.5078	1.28586
12.5	3.91972	1.44612	12.5	1.52975	1.26524
12.52	3.91569	1.24691	12.52	1.41954	1.24859
12.54	3.91379	1.12987	12.54	1.48847	1.25295
12.56	3.7262	1.36951	12.56	1.42745	1.31887
12.58	3.94304	1.342	12.58	1.50838	1.42494
12.6	3.88897	1.43519	12.6	1.53092	1.31762
12.62	3.90751	1.55752	12.62	1.50498	1.48672
12.64	3.77088	1.33012	12.64	1.56199	1.22356
12.66	4.02168	1.43079	12.66	1.5165	1.276
12.68	4.14865	1.42375	12.68	1.61441	1.36183
12.7	4.37583	1.41773	12.7	1.43004	1.31627
12.72	4.18026	1.41635	12.72	1.40898	1.16074
12.74	4.28105	1.44634	12.74	1.56358	1.31653
12.76	4.22886	1.41998	12.76	1.61943	1.50847
12.78	4.22868	1.17536	12.78	1.58069	1.51037
12.8	4.20818	1.4164	12.8	1.52818	1.35493
12.82	4.26193	1.32455	12.82	1.6366	1.17958
12.84	4.02486	1.47479	12.84	1.60937	1.0723
12.86	4.22362	1.33999	12.86	1.62625	1.35999
12.88	4.20502	1.20586	12.88	1.53397	1.34411
12.9	4.25006	1.34328	12.9	1.57039	1.22672
12.92	4.30187	1.43004	12.92	1.50799	1.21974
12.94	4.21039	1.40783	12.94	1.59884	1.22555
12.96	4.25456	1.22295	12.96	1.67608	1.29523
12.98	4.16677	1.40909	12.98	1.75907	1.26711
13	4.15875	1.36507	13	1.63574	1.06907
13.02	3.87004	1.21139	13.02	1.69144	1.01377
13.04	3.84828	1.18905	13.04	1.58769	1.21579
13.06	3.74835	1.57382	13.06	1.70964	1.27708
13.08	3.95233	1.45184	13.08	1.59233	1.27027
13.1	4.04889	1.5925	13.1	1.61709	1.08227
13.12	4.12675	1.27679	13.12	1.57272	1.24294
13.14	4.14365	1.36893	13.14	1.66241	1.30531
13.16	4.16271	1.33487	13.16	1.70878	1.29515
13.18	3.96091	1.42379	13.18	1.64927	1.3063
13.2	4.11123	1.52301	13.2	1.70454	1.33025
13.22	4.31912	1.33084	13.22	1.66241	1.16707
13.24	4.21617	1.2686	13.24	1.68957	1.4109
13.26	4.12248	1.32779	13.26	1.64636	1.29552
13.28	4.18329	1.43484	13.28	1.67828	1.1853
13.3	4.15994	1.53238	13.3	1.72497	1.36213
13.32	4.18165	1.50377	13.32	1.67703	1.09983
13.34	4.17986	1.19111	13.34	1.55633	1.42461
13.36	4.21592	1.30824	13.36	1.49994	1.18245
13.38	4.03509	1.29439	13.38	1.66345	1.13084
13.4	4.11571	1.3204	13.4	1.66047	1.16737
13.42	4.12757	1.39571	13.42	1.57345	1.49699
13.44	4.12019	1.28072	13.44	1.63677	1.15943
13.46	3.98697	1.40935	13.46	1.69241	1.49992
13.48	4.00147	1.47228	13.48	1.70131	1.39311
13.5	4.16766	1.35242	13.5	1.71152	1.52445
13.52	4.24369	1.40162	13.52	1.5658	1.27336
13.54	4.40383	1.33325	13.54	1.66692	1.23154
13.56	4.31982	1.27177	13.56	1.63238	1.17892
13.58	4.4081	1.44066	13.58	1.62779	1.21488
13.6	4.39733	1.38792	13.6	1.52723	1.12221
13.62	4.54528	1.38726	13.62	1.59982	1.28861
13.64	4.65264	1.41351	13.64	1.54115	1.42035
13.66	4.60446	1.36019	13.66	1.64578	1.16347
13.68	4.60154	1.31363	13.68	1.56179	0.676123
13.7	4.6199	1.40696	13.7	1.49732	1.2794
13.72	4.41948	1.25618	13.72	1.6758	1.00308
13.74	4.18838	1.4225	13.74	1.55137	1.33602
13.76	4.39473	1.3274	13.76	1.67137	1.28541
13.78	4.35034	1.48388	13.78	1.55909	1.20867
13.8	4.39476	1.53225	13.8	1.52786	1.2815
13.82	4.28361	1.52249	13.82	1.54991	0.735187
13.84	4.27981	1.46654	13.84	1.58135	0.98593
13.86	4.33664	1.32486	13.86	1.53371	1.13242
13.88	4.28412	1.43869	13.88	1.54683	1.07469
13.9	4.27008	1.30429	13.9	1.5992	1.41804
13.92	4.18064	1.46666	13.92	1.63543	0.935537
13.94	4.28583	1.4231	13.94	1.64576	0.963668
13.96	4.31106	1.2697	13.96	1.5625	1.18216
13.98	4.28712	1.16753	13.98	1.47108	1.08033
14	4.09897	1.6116	14	1.53483	1.12305
14.02	4.24325	1.27749	14.02	1.5342	1.52626
14.04	4.31201	1.46683	14.04	1.43155	1.20543
14.06	4.19851	1.43723	14.06	1.52248	1.20263
14.08	3.97477	1.1237	14.08	1.55341	1.12702
14.1	3.94495	1.20862	14.1	1.7823	1.2023
14.12	3.87958	1.34319	14.12	1.74266	1.34358
14.14	3.93196	1.18409	14.14	1.58195	1.26892
14.16	3.86929	1.28594	14.16	1.65819	1.14304
14.18	4.02238	1.44594	14.18	1.6853	1.08169
14.2	4.28837	1.13404	14.2	1.68372	1.10549
14.22	4.17406	1.30778	14.22	1.64467	1.36948
14.24	4.11425	1.19785	14.24	1.66687	1.35522
14.26	4.07644	1.3326	14.26	1.62105	0.992523
14.28	3.9423	1.33696	14.28	1.57254	1.04292
14.3	3.95031	1.4851	14.3	1.70386	1.3177
14.32	4.11634	1.33862	14.32	1.6644	1.11507
14.34	4.22718	1.37808	14.34	1.68425	1.18325
14.36	4.09951	1.35121	14.36	1.71875	1.39588
14.38	4.05586	1.35199	14.38	1.60164	1.04212
14.4	4.07286	1.42553	14.4	1.63564	0.981811
14.42	4.12366	1.45754	14.42	1.58038	1.42017
14.44	3.99397	1.31247	14.44	1.60584	1.31834
14.46	4.02889	1.32834	14.46	1.7085	1.33745
14.48	4.21174	1.49881	14.48	1.73644	0.922584
14.5	4.11272	1.34423	14.5	1.7026	1.23424
14.52	3.97883	1.28043	14.52	1.68741	1.27264
14.54	3.85869	1.38625	14.54	1.71018	1.02509
14.56	3.8194	1.18669	14.56	1.59284	1.17034
14.58	3.68108	1.20961	14.58	1.64387	1.30925
14.6	3.72912	1.38218	14.6	1.69187	1.36905
14.62	3.9216	1.26291	14.62	1.6964	1.25166
14.64	4.01864	1.25013	14.64	1.68965	0.979991
14.66	4.03181	1.50841	14.66	1.61435	1.26402
14.68	4.10795	1.21241	14.68	1.59508	1.27656
14.7	4.0305	1.47433	14.7	1.6385	0.977362
14.72	4.21804	1.39679	14.72	1.58877	1.19407
14.74	4.19629	1.56254	14.74	1.67081	1.18969
14.76	4.01227	1.45244	14.76	1.58403	1.32298
14.78	3.85817	1.33753	14.78	1.643	1.25528
14.8	3.89027	1.36252	14.8	1.64635	1.42542
14.82	3.95226	1.19746	14.82	1.54274	1.14686
14.84	4.04478	1.37563	14.84	1.55766	1.25565
14.86	3.93145	1.28675	14.86	1.49874	1.18945
14.88	3.75508	1.17199	14.88	1.67604	1.48047
14.9	3.84678	1.39672	14.9	1.59754	1.29589
14.92	3.73634	1.52516	14.92	1.53856	1.20382
14.94	3.63023	1.4406	14.94	1.49218	1.08361
14.96	3.66615	1.33879	14.96	1.6475	1.31536
14.98	3.71232	1.20197	14.98	1.64659	1.16411
15	3.85945	1.18797	15	1.55954	1.24739
15.02	3.731	1.41362	15.02	1.57327	1.23953
15.04	3.79187	1.52524	15.04	1.60757	1.10082
15.06	3.83883	1.43229	15.06	1.6981	1.34665
15.08	3.77562	1.37877	15.08	1.58353	1.12934
15.1	3.77841	1.41651	15.1	1.62343	1.26888
15.12	3.99005	1.38324	15.12	1.65845	1.30783
15.14	3.99296	1.2053	15.14	1.67998	1.17409
15.16	3.91975	1.43586	15.16	1.57439	1.2471
15.18	3.75745	1.18644	15.18	1.59005	1.42874
15.2	4.10373	1.40772	15.2	1.6064	1.4388
15.22	4.19025	1.26342	15.22	1.52651	1.36684
15.24	4.14867	1.33921	15.24	1.46679	1.18956
15.26	4.23533	1.287	15.26	1.54107	1.41109
15.28	4.26134	1.59739	15.28	1.61709	1.34563
15.3	4.03623	1.40425	15.3	1.44791	1.27714
15.32	4.27069	1.28765	15.32	1.4986	1.44838
15.34	4.27491	1.51101	15.34	1.58584	1.46681
15.36	4.39364	1.05413	15.36	1.40895	1.15589
15.38	4.50247	1.4807	15.38	1.46604	1.34537
15.4	4.59585	1.14403	15.4	1.53825	1.32997
15.42	4.38174	1.41181	15.42	1.43696	1.35782
15.44	4.58448	1.25509	15.44	1.41327	1.2149
15.46	4.51431	1.05833	15.46	1.50358	1.39253
15.48	4.38337	1.38416	15.48	1.53988	1.3731
15.5	4.33921	1.18099	15.5	1.60989	1.41254
15.52	4.43243	1.31338	15.52	1.56027	1.13555
15.54	4.52224	1.65901	15.54	1.55944	1.20196
15.56	4.26491	1.41235	15.56	1.63	1.42453
15.58	4.04329	1.40591	15.58	1.52602	0.908963
15.6	4.04113	1.38297	15.6	1.53722	1.13243
15.62	4.04245	1.51099	15.62	1.5773	1.03848
15.64	4.11387	1.57321	15.64	1.51576	1.22303
15.66	4.11653	1.09944	15.66	1.51572	0.998876
15.68	3.90898	1.43456	15.68	1.47725	1.26897
15.7	3.93148	1.24914	15.7	1.59769	1.03184
15.72	3.84746	1.41092	15.72	1.56576	1.30514
15.74	3.98438	1.57168	15.74	1.54464	1.16535
15.76	3.96684	1.32398	15.76	1.63008	1.3944
15.78	3.98301	1.28508	15.78	1.59727	1.45884
15.8	3.97709	1.18412	15.8	1.4753	1.3802
15.82	3.83177	1.33414	15.82	1.5153	0.964612
15.84	3.91068	1.3304	15.84	1.53429	1.31962
15.86	3.75849	1.46178	15.86	1.52649	1.23547
15.88	3.80058	1.36757	15.88	1.51184	1.14651
15.9	3.85312	1.57633	15.9	1.52218	1.54983
15.92	3.70518	1.42721	15.92	1.60915	1.43185
15.94	3.81652	1.14506	15.94	1.52667	1.38821
15.96	3.87196	1.42927	15.96	1.49202	1.29116
15.98	3.86788	1.32971	15.98	1.54738	1.15127
16	3.8452	1.28893	16	1.58161	1.2182
16.02	3.89311	1.35622	16.02	1.62566	1.14571
16.04	3.95283	1.10913	16.04	1.67215	1.55383
16.06	3.912	1.32309	16.06	1.61713	1.22685
16.08	4.06594	1.45797	16.08	1.52326	1.2561
16.1	4.1443	1.50057	16.1	1.63827	1.36464
16.12	4.03598	1.3237	16.12	1.49718	1.3116
16.14	3.98212	1.28603	16.14	1.55533	0.991493
16.16	4.03199	1.41146	16.16	1.56853	1.33676
16.18	4.18814	1.35771	16.18	1.55963	1.2959
16.2	4.12137	1.25659	16.2	1.45704	1.16414
16.22	4.02955	1.39538	16.22	1.57129	1.24987
16.24	4.10683	1.40315	16.24	1.60081	1.39864
16.26	4.2425	1.40096	16.26	1.55984	0.99974
16.28	4.35832	1.40234	16.28	1.44875	1.06977
16.3	4.46328	1.38429	16.3	1.50254	1.25435
16.32	4.50225	1.27767	16.32	1.51281	1.38065
16.34	4.59147	1.4661	16.34	1.52777	1.1847
16.36	4.55078	1.1435	16.36	1.5363	1.26087
16.38	4.57422	1.30866	16.38	1.49231	1.36288
16.4	4.6005	1.33617	16.4	1.61403	1.21485
16.42	4.52901	1.37763	16.42	1.54609	1.24103
16.44	4.6302	1.44241	16.44	1.57407	1.24218
16.46	4.38285	1.33305	16.46	1.61025	1.15887
16.48	4.3154	1.26469	16.48	1.57171	1.30169
16.5	4.318	1.49116	16.5	1.50078	1.46004
16.52	4.40406	1.52466	16.52	1.60654	1.23099
16.54	4.3195	1.37664	16.54	1.70164	1.39742
16.56	4.35842	1.50448	16.56	1.57176	1.26184
16.58	4.31508	1.37593	16.58	1.68868	1.39344
16.6	4.40985	1.44734	16.6	1.56768	1.49735
16.62	4.33266	1.14907	16.62	1.60312	1.3578
16.64	4.38174	1.43541	16.64	1.55312	1.40902
16.66	4.34223	1.32907	16.66	1.47433	1.28037
16.68	4.17098	1.46764	16.68	1.53549	1.1787
16.7	4.06469	1.34065	16.7	1.49103	1.37728
16.72	4.27515	1.23408	16.72	1.49391	0.943203
16.74	4.36713	1.25687	16.74	1.5143	1.29534
16.76	4.3704	1.23879	16.76	1.54383	1.27193
16.78	4.40244	1.29685	16.78	1.57826	1.39224
16.8	4.36546	1.22808	16.8	1.58373	1.24395
16.82	4.41324	1.35819	16.82	1.63279	1.34909
16.84	4.50829	1.25946	16.84	1.64356	1.04792
16.86	4.39248	1.49595	16.86	1.65986	1.04455
16.88	4.38782	1.29932	16.88	1.53737	1.35058
16.9	4.42815	1.50549	16.9	1.55209	1.21689
16.92	4.26147	1.20159	16.92	1.6018	0.989972
16.94	4.4764	1.21969	16.94	1.56149	1.06517
16.96	4.2345	1.46827	16.96	1.52436	1.35337
16.98	4.35812	1.53518	16.98	1.51405	1.20291
17	4.48809	1.40746	17	1.54749	1.16202
17.02	4.38304	1.30812	17.02	1.58584	1.07843
17.04	4.33807	1.47516	17.04	1.71631	1.04221
17.06	4.27032	1.26857	17.06	1.52025	1.34713
17.08	4.39857	1.47791	17.08	1.50052	1.16833
17.1	4.40694	1.38284	17.1	1.58765	1.21681
17.12	4.54153	1.46463	17.12	1.61279	1.38299
17.14	4.41039	1.25042	17.14	1.61831	1.45045
17.16	4.41904	1.6341	17.16	1.66334	1.13136
17.18	4.60034	1.25023	17.18	1.5787	1.38995
17.2	4.51943	1.47429	17.2	1.6231	1.32296
17.22	4.56058	1.25812	17.22	1.61139	1.09188
17.24	4.66197	1.26558	17.24	1.61836	1.00183
17.26	4.62133	1.36431	17.26	1.6987	1.51823
17.28	4.68718	1.53559	17.28	1.6462	1.08115
17.3	4.74825	1.47789	17.3	1.54761	1.21055
17.32	4.56539	1.33243	17.32	1.593	1.19405
17.34	4.75927	1.4691	17.34	1.55533	1.19541
17.36	4.71727	1.30155	17.36	1.5433	1.1856
17.38	4.74129	1.24566	17.38	1.50354	1.40496
17.4	4.75458	1.57147	17.4	1.47144	0.98666
17.42	4.60505	1.55612	17.42	1.50685	0.857957
17.44	4.47362	1.43493	17.44	1.55577	1.00215
17.46	4.66699	1.23625	17.46	1.67042	1.09622
17.48	4.68627	1.32247	17.48	1.70988	1.13474
17.5	4.60792	1.46729	17.5	1.79434	1.16325
17.52	4.60317	1.31648	17.52	1.6555	1.36435
17.54	4.63081	1.33874	17.54	1.57096	1.38967
17.56	4.59079	1.32307	17.56	1.75331	1.05034
17.58	4.4176	1.32811	17.58	1.65231	1.40328
17.6	4.5144	1.49681	17.6	1.70731	1.19476
17.62	4.65861	1.26752	17.62	1.63392	1.21272
17.64	4.58287	1.41136	17.64	1.56783	1.33996
17.66	4.513	1.50872	17.66	1.56361	1.37036
17.68	4.6009	1.4661	17.68	1.78362	1.23035
17.7	4.53772	1.30937	17.7	1.59789	1.03501
17.72	4.5808	1.21261	17.72	1.47729	1.20521
17.74	4.62391	1.48213	17.74	1.61028	1.37788
17.76	4.71429	1.47181	17.76	1.54349	1.44459
17.78	4.80762	1.46271	17.78	1.63351	1.37523
17.8	4.7033	1.39812	17.8	1.70108	1.40156
17.82	4.61226	1.5275	17.82	1.65267	1.37242
17.84	4.58069	1.52624	17.84	1.71326	0.984592
17.86	4.56541	1.28943	17.86	1.52882	1.36295
17.88	4.59039	1.21914	17.88	1.57373	1.51849
17.9	4.52637	1.31169	17.9	1.59473	1.27364
17.92	4.55334	1.20497	17.92	1.66408	0.32896
17.94	4.56341	1.31026	17.94	1.79635	1.3326
17.96	4.59697	1.43196	17.96	1.80218	0.714257
17.98	4.51009	1.28197	17.98	1.62969	1.2787
18	4.4609	1.35337	18	1.59121	1.44659
18.02	4.52839	1.30803	18.02	1.55147	1.50126
18.04	4.39024	1.38373	18.04	1.5854	1.4521
18.06	4.60679	1.45139	18.06	1.60717	0.978976
18.08	4.52659	1.42215	18.08	1.67778	0.898156
18.1	4.44021	1.65483	18.1	1.68844	1.48078
18.12	4.6182	1.49738	18.12	1.60881	1.04153
18.14	4.73311	1.26969	18.14	1.65848	1.1499
18.16	4.64784	1.12012	18.16	1.59395	0.970131
18.18	4.65024	1.40665	18.18	1.70653	1.49759
18.2	4.68859	1.06423	18.2	1.64028	1.4621
18.22	4.68847	1.43063	18.22	1.58909	1.46075
18.24	4.62509	1.34253	18.24	1.66995	1.48451
18.26	4.61337	1.24577	18.26	1.63223	1.40097
18.28	4.62957	1.45121	18.28	1.57799	1.31775
18.3	4.67197	1.49743	18.3	1.69109	1.50614
18.32	4.56522	1.53007	18.32	1.69087	1.25141
18.34	4.59498	1.31838	18.34	1.7525	1.47845
18.36	4.60901	1.41525	18.36	1.48282	1.53337
18.38	4.62208	1.39518	18.38	1.62841	1.25487
18.4	4.66	1.48962	18.4	1.53005	1.43359
18.42	4.57136	1.61833	18.42	1.65445	1.05306
18.44	4.52711	1.5041	18.44	1.61187	1.33398
18.46	4.49036	1.12672	18.46	1.66827	1.48767
18.48	4.62116	1.29042	18.48	1.58385	1.2312
18.5	4.54851	1.4247	18.5	1.67982	1.14237
18.52	4.55953	1.50176	18.52	1.59948	1.34583
18.54	4.59419	1.4869	18.54	1.65787	0.91525
18.56	4.64729	1.41271	18.56	1.54681	1.16514
18.58	4.62975	1.2538	18.58	1.5931	1.02248
18.6	4.66855	1.54841	18.6	1.59956	1.38828
18.62	4.63656	1.42573	18.62	1.5325	1.37694
18.64	4.59961	1.23436	18.64	1.60877	1.32056
18.66	4.55839	1.33209	18.66	1.55194	1.244
18.68	4.62657	1.49813	18.68	1.68406	1.35294
18.7	4.53455	1.40159	18.7	1.60742	1.42569
18.72	4.53068	1.52201	18.72	1.64045	1.31831
18.74	4.47944	1.4003	18.74	1.64098	1.37588
18.76	4.58628	1.3968	18.76	1.6243	1.26405
18.78	4.56643	1.36166	18.78	1.60249	1.45555
18.8	4.55825	1.46329	18.8	1.5849	1.39279
18.82	4.53344	1.07995	18.82	1.54753	1.3678
18.84	4.54417	1.3371	18.84	1.52162	1.57882
18.86	4.53101	1.43494	18.86	1.46397	1.48486
18.88	4.52215	1.4381	18.88	1.48224	1.61335
18.9	4.45644	1.15994	18.9	1.46774	1.31444
18.92	4.53362	1.2765	18.92	1.55492	1.20028
18.94	4.5474	1.18915	18.94	1.58898	1.35308
18.96	4.51596	1.37847	18.96	1.54379	1.27894
18.98	4.46232	1.56204	18.98	1.58083	1.30266
19	4.53021	1.37926	19	1.56198	1.25445
19.02	4.57772	1.43035	19.02	1.58968	1.62213
19.04	4.60721	1.33495	19.04	1.61391	1.37511
19.06	4.5826	1.15631	19.06	1.70057	1.40679
19.08	4.55555	1.4262	19.08	1.62564	1.52346
19.1	4.55197	1.48705	19.1	1.686	1.19389
19.12	4.54161	1.46981	19.12	1.81241	1.13477
19.14	4.57439	1.47167	19.14	1.56846	1.20954
19.16	4.66039	1.35706	19.16	1.52625	1.12658
19.18	4.67472	1.23834	19.18	1.45536	1.12528
19.2	4.61052	1.46596	19.2	1.37725	1.32203
19.22	4.60188	1.29038	19.22	1.44982	1.44134
19.24	4.53141	1.47764	19.24	1.58155	1.20178
19.26	4.52634	1.36964	19.26	1.5042	1.16344
19.28	4.62232	1.42585	19.28	1.54734	1.44857
19.3	4.59219	1.35167	19.3	1.5839	1.46565
19.32	4.66686	1.37114	19.32	1.53816	1.24729
19.34	4.71667	1.35196	19.34	1.50595	1.21294
19.36	4.67958	1.30749	19.36	1.54978	1.23956
19.38	4.64365	1.34478	19.38	1.42132	1.30446
19.4	4.63455	1.36964	19.4	1.38119	1.52781
19.42	4.61494	1.24817	19.42	1.49572	1.34295
19.44	4.65381	1.25252	19.44	1.51304	1.26258
19.46	4.68736	1.4411	19.46	1.56927	1.1166
19.48	4.69092	1.17361	19.48	1.62559	1.30502
19.5	4.6759	1.16885	19.5	1.60573	1.16537
19.52	4.75621	1.45578	19.52	1.72757	1.11984
19.54	4.81334	1.45028	19.54	1.6487	1.29375
19.56	4.78021	1.17725	19.56	1.73462	1.31563
19.58	4.80412	1.50869	19.58	1.63381	1.4565
19.6	4.90292	1.37235	19.6	1.69138	1.06284
19.62	4.80028	1.42089	19.62	1.77743	1.4457
19.64	4.73517	1.17761	19.64	1.61741	1.35701
19.66	4.7705	1.60003	19.66	1.59626	1.47399
19.68	4.70843	1.39528	19.68	1.61269	1.25423
19.7	4.71319	1.36731	19.7	1.66697	1.15112
19.72	4.76409	1.41022	19.72	1.6802	1.11624
19.74	4.72993	1.43187	19.74	1.67486	1.46788
19.76	4.77223	1.46077	19.76	1.68304	1.34198
19.78	4.70264	1.45771	19.78	1.61989	1.10118
19.8	4.75768	1.41868	19.8	1.69536	1.15343
19.82	4.6549	1.43598	19.82	1.69326	1.43951
19.84	4.64717	1.32778	19.84	1.77433	1.06787
19.86	4.68167	1.44359	19.86	1.72003	0.882986
19.88	4.6635	1.41574	19.88	1.7587	1.31908
19.9	4.59406	1.54786	19.9	1.79901	1.09047
19.92	4.68989	1.43894	19.92	1.73079	1.27603
19.94	4.54282	1.5204	19.94	1.84218	1.15299
19.96	4.66064	1.35952	19.96	1.7573	1.45897
19.98	4.72089	1.49885	19.98	1.76664	1.23859
20	4.71406	1.31425	20	1.84599	0.990825
20.02	4.61156	1.20803	20.02	1.71658	1.43898
20.04	4.56633	1.25797	20.04	1.69691	0.933
20.06	4.59462	1.36767	20.06	1.62585	1.16004
20.08	4.66139	1.24536	20.08	1.577	1.01304
20.1	4.64906	1.38368	20.1	1.79881	1.09956
20.12	4.64328	1.51063	20.12	1.79163	0.972998
20.14	4.70268	1.44318	20.14	1.71107	1.00338
20.16	4.67372	1.61268	20.16	1.68722	1.08103
20.18	4.67383	1.3069	20.18	1.61918	1.16754
20.2	4.62874	1.10741	20.2	1.67185	1.33045
20.22	4.65033	1.29518	20.22	1.60393	1.34712
20.24	4.62247	1.16376	20.24	1.799	1.0673
20.26	4.66993	1.43317	20.26	1.68765	1.24691
20.28	4.69389	1.38965	20.28	1.76976	1.29781
20.3	4.75392	1.31649	20.3	1.78112	1.28521
20.32	4.75776	1.14921	20.32	1.67892	1.17041
20.34	4.74973	1.18313	20.34	1.73177	1.3502
20.36	4.74408	1.18471	20.36	1.7335	0.993188
20.38	4.70861	1.2621	20.38	1.86045	1.1695
20.4	4.71079	1.12901	20.4	1.84195	1.41413
20.42	4.63086	1.1186	20.42	1.66946	1.28951
20.44	4.73313	1.56678	20.44	1.65254	1.2907
20.46	4.54547	1.43754	20.46	1.56248	1.32249
20.48	4.59165	1.40229	20.48	1.79014	1.0342
20.5	4.57973	1.16925	20.5	1.74993	1.24472
20.52	4.58339	1.14497	20.52	1.77556	1.18326
20.54	4.61766	1.30734	20.54	1.75772	1.36502
20.56	4.60722	1.34667	20.56	1.86123	1.03236
20.58	4.61035	1.41434	20.58	1.77798	1.15996
20.6	4.5579	1.54125	20.6	1.68309	1.29075
20.62	4.49342	1.34183	20.62	1.65284	1.08447
20.64	4.5845	1.19726	20.64	1.69087	1.38572
20.66	4.56156	1.38325	20.66	1.87946	1.22867
20.68	4.5845	1.34889	20.68	1.76864	1.31629
20.7	4.59056	1.34695	20.7	1.78012	1.42116
20.72	4.63505	1.31166	20.72	1.74348	1.36439
20.74	4.55953	1.52271	20.74	1.78648	1.35234
20.76	4.64631	1.54787	20.76	1.77737	1.46488
20.78	4.58606	1.47305	20.78	1.61029	1.6087
20.8	4.62351	1.45402	20.8	1.78253	1.45695
20.82	4.49648	1.54249	20.82	1.71951	1.50314
20.84	4.45074	1.41906	20.84	1.64421	1.29214
20.86	4.56727	1.25262	20.86	1.61598	1.48872
20.88	4.61915	1.29656	20.88	1.57669	1.45125
20.9	4.59661	1.51724	20.9	1.7229	1.45971
20.92	4.57595	1.15447	20.92	1.67837	1.43406
20.94	4.50236	1.25073	20.94	1.73126	1.38305
20.96	4.65299	1.38891	20.96	1.62238	1.25136
20.98	4.66947	1.17041	20.98	1.55114	1.45359
21	4.43375	1.19927	21	1.61996	1.32839
21.02	4.4217	1.42106	21.02	1.74221	1.38666
21.04	4.51433	1.38911	21.04	1.64718	1.21445
21.06	4.57384	1.26416	21.06	1.59476	1.48113
21.08	4.57807	1.31938	21.08	1.64078	1.37868
21.1	4.51719	1.29351	21.1	1.4331	1.41493
21.12	4.64264	1.28185	21.12	1.57141	1.31096
21.14	4.62483	1.40336	21.14	1.60538	1.41756
21.16	4.65402	1.21029	21.16	1.59725	1.41409
21.18	4.65507	1.38851	21.18	1.60738	1.38312
21.2	4.61388	1.18899	21.2	1.6878	1.21648
21.22	4.59925	1.21499	21.22	1.71704	1.2864
21.24	4.59914	1.33031	21.24	1.80414	1.43008
21.26	4.61408	1.43676	21.26	1.68513	1.35952
21.28	4.54885	1.3007	21.28	1.58883	1.19673
21.3	4.47825	1.30836	21.3	1.59866	1.28058
21.32	4.58805	1.14294	21.32	1.62193	1.48026
21.34	4.48137	1.49191	21.34	1.65421	1.29665
21.36	4.64922	1.21241	21.36	1.5421	1.55289
21.38	4.56318	1.44654	21.38	1.59653	1.48178
21.4	4.69524	1.34778	21.4	1.65334	1.35159
21.42	4.67254	1.25972	21.42	1.64849	1.27832
21.44	4.64427	1.34749	21.44	1.65597	1.43483
21.46	4.6347	1.46751	21.46	1.58626	1.24522
21.48	4.58349	1.20295	21.48	1.50073	1.14145
21.5	4.56562	1.08092	21.5	1.58882	1.22716
21.52	4.64447	1.4642	21.52	1.57271	1.54836
21.54	4.65794	1.34838	21.54	1.49359	1.13586
21.56	4.56077	1.35974	21.56	1.61476	1.0534
21.58	4.65628	1.32558	21.58	1.57323	1.22207
21.6	4.71875	1.33709	21.6	1.56888	1.24519
21.62	4.66598	1.1096	21.62	1.61676	1.2613
21.64	4.60073	1.41249	21.64	1.6815	1.53052
21.66	4.66814	1.21958	21.66	1.65583	1.4298
21.68	4.60383	1.44066	21.68	1.69643	1.22859
21.7	4.63765	1.32109	21.7	1.65409	1.1968
21.72	4.61839	1.34248	21.72	1.67807	1.53073
21.74	4.67496	1.29887	21.74	1.65522	1.2967
21.76	4.62034	1.35979	21.76	1.56159	1.40652
21.78	4.7312	1.26043	21.78	1.57528	1.30275
21.8	4.83462	1.31437	21.8	1.65813	1.28624
21.82	4.72799	1.57238	21.82	1.61606	1.20903
21.84	4.77855	1.35626	21.84	1.68034	1.67586
21.86	4.75838	1.27954	21.86	1.66293	1.49569
21.88	4.82514	1.26815	21.88	1.69111	1.40178
21.9	4.90482	1.16752	21.9	1.64761	1.22055
21.92	4.72567	1.38242	21.92	1.75546	1.28574
21.94	4.66946	1.47263	21.94	1.6501	1.19229
21.96	4.57902	1.4858	21.96	1.77422	1.12598
21.98	4.65063	1.42711	21.98	1.72803	1.41725
22	4.64171	1.21555	22	1.77014	1.2592
22.02	4.68419	1.34457	22.02	1.69689	1.1619
22.04	4.67006	1.62157	22.04	1.68363	1.01287
22.06	4.69475	1.38717	22.06	1.82981	1.19986
22.08	4.61004	1.49198	22.08	1.69261	1.38069
22.1	4.71498	1.31817	22.1	1.64941	1.14631
22.12	4.76601	1.38888	22.12	1.73771	1.39513
22.14	4.83641	1.53143	22.14	1.67613	1.18174
22.16	4.76002	1.58256	22.16	1.58206	1.3225
22.18	4.70089	1.31423	22.18	1.82515	0.914872
22.2	4.71991	1.13254	22.2	1.71582	1.22491
22.22	4.77679	1.57853	22.22	1.66818	1.17086
22.24	4.73108	1.2501	22.24	1.70362	1.33462
22.26	4.71239	1.16558	22.26	1.60341	1.27878
22.28	4.60956	1.27714	22.28	1.64111	1.1866
22.3	4.65632	1.28692	22.3	1.56879	1.40079
22.32	4.74305	1.26331	22.32	1.59118	1.04943
22.34	4.60912	1.32717	22.34	1.61461	1.27859
22.36	4.54815	1.38964	22.36	1.58366	1.18317
22.38	4.65459	1.3495	22.38	1.63006	1.12241
22.4	4.71774	1.49358	22.4	1.61843	1.11946
22.42	4.72917	1.28721	22.42	1.80183	1.19919
22.44	4.65737	1.53808	22.44	1.74812	1.34861
22.46	4.64709	1.3017	22.46	1.72532	1.41399
22.48	4.68472	1.18928	22.48	1.74029	1.07407
22.5	4.69397	1.52699	22.5	1.59334	1.04174
22.52	4.65917	1.13214	22.52	1.65572	0.958705
22.54	4.74887	1.4669	22.54	1.67402	1.35796
22.56	4.62763	1.51667	22.56	1.59943	1.18713
22.58	4.73812	1.52949	22.58	1.5887	1.4737
22.6	4.74758	1.45629	22.6	1.60297	1.29158
22.62	4.71903	1.42692	22.62	1.57551	0.981352
22.64	4.65453	1.3681	22.64	1.61035	1.13306
22.66	4.71604	1.56589	22.66	1.57839	1.25972
22.68	4.73145	1.38609	22.68	1.57646	1.32708
22.7	4.67593	1.43616	22.7	1.63134	1.43533
22.72	4.75323	1.42865	22.72	1.72711	1.30599
22.74	4.74535	1.33244	22.74	1.85313	1.03384
22.76	4.78256	1.31608	22.76	1.72304	1.36991
22.78	4.7825	1.37091	22.78	1.7039	1.05987
22.8	4.70993	1.38605	22.8	1.77201	1.0355
22.82	4.81921	1.39887	22.82	1.64101	1.26122
22.84	4.70624	1.50883	22.84	1.65813	1.2435
22.86	4.66854	0.99419	22.86	1.63724	1.25854
22.88	4.60647	1.15719	22.88	1.72391	1.2758
22.9	4.60835	1.14436	22.9	1.65713	1.20935
22.92	4.60055	1.25343	22.92	1.50409	1.08905
22.94	4.54162	0.968045	22.94	1.67187	0.902705
22.96	4.43694	0.966625	22.96	1.71718	0.947134
22.98	4.47596	0.997319	22.98	1.68089	1.36062
23	4.49354	0.709809	23	1.60687	0.952017
23.02	4.56545	0.83635	23.02	1.58297	1.17958
23.04	4.64523	0.835871	23.04	1.61997	1.11604
23.06	4.57062	1.29379	23.06	1.6484	1.38284
23.08	4.63233	1.05712	23.08	1.69519	1.42063
23.1	4.63846	1.33087	23.1	1.60653	1.24961
23.12	4.61343	1.0695	23.12	1.47318	1.29571
23.14	4.64904	0.822573	23.14	1.49753	0.927715
23.16	4.71932	0.868203	23.16	1.57719	1.04341
23.18	4.67883	1.10481	23.18	1.55962	1.12729
23.2	4.54607	1.09093	23.2	1.56623	1.16302
23.22	4.51004	1.19065	23.22	1.62022	1.3165
23.24	4.54828	0.967553	23.24	1.6351	1.15435
23.26	4.68124	0.984606	23.26	1.50458	1.26181
23.28	4.75954	0.917718	23.28	1.63523	1.37845
23.3	4.60681	1.09885	23.3	1.65173	1.30555
23.32	4.4762	1.13775	23.32	1.58299	0.984619
23.34	4.51944	1.32123	23.34	1.75062	1.08873
23.36	4.48341	1.30778	23.36	1.60618	1.18994
23.38	4.61755	0.942028	23.38	1.77971	1.36669
23.4	4.52246	0.84818	23.4	1.68622	1.23762
23.42	4.38191	0.977014	23.42	1.70018	1.05443
23.44	4.45145	0.900215	23.44	1.65929	1.18101
23.46	4.515	0.985713	23.46	1.69252	1.38336
23.48	4.41006	1.00422	23.48	1.60249	0.91026
23.5	4.43781	1.00493	23.5	1.60838	1.233
23.52	4.47649	1.01079	23.52	1.60053	1.40277
23.54	4.48773	0.886708	23.54	1.45685	1.14748
23.56	4.40641	1.05969	23.56	1.57901	1.32882
23.58	4.37769	1.02577	23.58	1.66555	1.18515
23.6	4.45904	1.15195	23.6	1.56402	1.38208
23.62	4.55879	0.756548	23.62	1.56795	1.3656
23.64	4.45537	0.91716	23.64	1.66186	1.13923
23.66	4.49225	0.706373	23.66	1.53676	1.0582
23.68	4.48995	1.03699	23.68	1.48368	1.36607
23.7	4.49774	1.03908	23.7	1.55158	1.28117
23.72	4.50622	0.763994	23.72	1.62659	1.22165
23.74	4.46961	0.924262	23.74	1.4826	1.19974
23.76	4.63093	0.733609	23.76	1.54781	1.46256
23.78	4.56511	0.976023	23.78	1.59641	1.1655
23.8	4.58218	0.882225	23.8	1.6708	1.03605
23.82	4.55376	1.1684	23.82	1.71072	1.249
23.84	4.56368	0.873931	23.84	1.60046	1.06438
23.86	4.55228	0.983357	23.86	1.56398	1.13378
23.88	4.58695	1.11903	23.88	1.63306	1.11534
23.9	4.60166	1.1287	23.9	1.53093	0.909841
23.92	4.56232	1.26034	23.92	1.5009	1.16708
[truncated: 1,305 more rows]
