# Supplementary material for: Virtual Screening for FDA-Approved Drugs That Selectively Inhibit Arginase Type 1 and 2
Source: Molecules. 2022 Aug 12;27(16):5134. doi: 10.3390/molecules27165134 (PMC9416497; doi:10.3390/molecules27165134)
Supplement: Supplementary file 1 [file molecules-27-05134-s001.zip › Table S10.xlsx]

## Sheet: H-bonds_statistics_3_sets
Set A		Protein		Ligand			Protein		Ligand
	3SJT (ARG1)	Average_RMSD	SD(+/-)	Average_RMSD	SD(+/-)	4HZE (ARG2)	Average_RMSD	SD(+/-)	Average_RMSD	SD(+/-)
	Candesartan	3.42428	0.332327	3.45355	0.475374	Candesartan	1.86234	0.225392	2.14133	0.552708
	Irbesartan	3.03458	0.629533	2.27606	0.660224	Irbesartan	2.00044	0.400335	2.80591	0.547698
	Codeine	4.21874	1.37692	0.8669	0.167464	Codeine	1.78042	0.223046	0.917098	0.153677
	Isavucanazole	3.28215	0.650515	2.27643	0.468899	Isavucanazole	1.73948	0.263383	1.89595	0.69177
	Metformin	3.78223	0.547313	1.01471	0.185544	Metformin	1.59719	0.203266	1.19665	0.186046
Set B		Protein		Ligand			Protein		Ligand
	3SJT (ARG1)	Average_RMSD	SD(+/-)	Average_RMSD	SD(+/-)	4HZE (ARG2)	Average_RMSD	SD(+/-)	Average_RMSD	SD(+/-)
	Candesartan	3.16582	0.639563	3.08149	0.839791	Candesartan	1.53875	0.173073	2.5414	0.540319
	Irbesartan	3.11043	0.543023	2.76597	0.640321	Irbesartan	1.93005	0.19292	3.09948	0.496336
	Codeine	3.19818	0.558234	0.997651	0.163715	Codeine	1.99142	0.314997	0.820827	0.155879
	Isavucanazole	3.16485	0.69895	2.24502	0.372696	Isavucanazole	1.69361	0.213373	2.09305	0.544166
	Metformin	3.07899	0.716153	0.886345	0.175503	Metformin	1.35955	0.162503	1.17631	0.152897
Set C		Protein		Ligand			Protein		Ligand
	3SJT (ARG1)	Average_RMSD	SD(+/-)	Average_RMSD	SD(+/-)	4HZE (ARG2)	Average_RMSD	SD(+/-)	Average_RMSD	SD(+/-)
	Candesartan	3.06158	0.508986	2.45427	0.842526	Candesartan	1.45901	0.280402	2.21568	0.667468
	Irbesartan	3.12392	0.672503	2.5536	0.480619	Irbesartan	1.46019	0.130389	2.68296	0.595324
	Codeine	3.04659	0.39054	0.745367	0.198485	Codeine	1.84124	0.158889	0.861233	0.120424
	Isavucanazole	3.02373	0.420544	2.07917	0.525393	Isavucanazole	1.87857	0.252669	2.37335	0.298323
	Metformin	4.17653	0.842348	1.21654	0.187471	Metformin	1.59529	0.203509	1.21519	0.198653
