# Supplementary material for: Virtual Screening for FDA-Approved Drugs That Selectively Inhibit Arginase Type 1 and 2
Source: Molecules. 2022 Aug 12;27(16):5134. doi: 10.3390/molecules27165134 (PMC9416497; doi:10.3390/molecules27165134)
Supplement: Supplementary file 1 [file molecules-27-05134-s001.zip › Table S11.xlsx]

## Sheet: rmsd_3_pose_fda_ligand
Ligand	ARG1_rmsd			ARG2_rmsd
	3sjt_4hxq	3sjt_4hww	4hww_4hxq	4hze_4ixu	4hze_4i06	4ixu_4i06
amiloride	0.979	0.688	0.457	0.162	0.284	0.344
candesartan	1.059	0.834	1.509	0.555	1.443	1.497
Irbesartan	0.723	0.883	0.849	0.438	1.41	1.515
budesonide	1.371	0.489	1.244	1.537	1.149	0.532
codeine	0.25	0.494	0.444	0.282	0.251	0.385
Indapamide	0.841	0.778	0.479	1.256	0.7	1.359
Isavuconazole	0.946	0.938	1.184	0.883	1.229	0.649
Ivabridine	1.632	1.155	1.274	1.571	0.811	1.393
Metformin	0.115	0.485	0.506	0.356	0.477	0.598
Rolapitant	2.084	2.229	1.084	0.897	1.212	1.68
